# Supplementary material for: Characterization of the binding process between gallic acid and trivalent chromium in tannery wastewater: a spectroscopic perspective
Source: Royal Society of Chemistry journal article supplement (doi:10.1039/d4em00621f), 2025-01-01
Supplement: d4em00621f1.log [file d4em00621f1.log]

 Entering Gaussian System, Link 0=g16
 Input=149-91-7-meta13-Cr.gjf
 Output=149-91-7-meta13-Cr.log
 Initial command:
 /home/xut/apps/g16/l1.exe "/home/xut/apps/g16/scratch/xut/661.master/Gau-11294.inp" -scrdir="/home/xut/apps/g16/scratch/xut/661.master/"
 Entering Link 1 = /home/xut/apps/g16/l1.exe PID=     11315.
  
 Copyright (c) 1988,1990,1992,1993,1995,1998,2003,2009,2016,
            Gaussian, Inc.  All Rights Reserved.
  
 This is part of the Gaussian(R) 16 program.  It is based on
 the Gaussian(R) 09 system (copyright 2009, Gaussian, Inc.),
 the Gaussian(R) 03 system (copyright 2003, Gaussian, Inc.),
 the Gaussian(R) 98 system (copyright 1998, Gaussian, Inc.),
 the Gaussian(R) 94 system (copyright 1995, Gaussian, Inc.),
 the Gaussian 92(TM) system (copyright 1992, Gaussian, Inc.),
 the Gaussian 90(TM) system (copyright 1990, Gaussian, Inc.),
 the Gaussian 88(TM) system (copyright 1988, Gaussian, Inc.),
 the Gaussian 86(TM) system (copyright 1986, Carnegie Mellon
 University), and the Gaussian 82(TM) system (copyright 1983,
 Carnegie Mellon University). Gaussian is a federally registered
 trademark of Gaussian, Inc.
  
 This software contains proprietary and confidential information,
 including trade secrets, belonging to Gaussian, Inc.
  
 This software is provided under written license and may be
 used, copied, transmitted, or stored only in accord with that
 written license.
  
 The following legend is applicable only to US Government
 contracts under FAR:
  
                    RESTRICTED RIGHTS LEGEND
  
 Use, reproduction and disclosure by the US Government is
 subject to restrictions as set forth in subparagraphs (a)
 and (c) of the Commercial Computer Software - Restricted
 Rights clause in FAR 52.227-19.
  
 Gaussian, Inc.
 340 Quinnipiac St., Bldg. 40, Wallingford CT 06492
  
  
 ---------------------------------------------------------------
 Warning -- This program may not be used in any manner that
 competes with the business of Gaussian, Inc. or will provide
 assistance to any competitor of Gaussian, Inc.  The licensee
 of this program is prohibited from giving any competitor of
 Gaussian, Inc. access to this program.  By using this program,
 the user acknowledges that Gaussian, Inc. is engaged in the
 business of creating and licensing software in the field of
 computational chemistry and represents and warrants to the
 licensee that it is not a competitor of Gaussian, Inc. and that
 it will not use this program in any manner prohibited above.
 ---------------------------------------------------------------
  

 Cite this work as:
 Gaussian 16, Revision A.03,
 M. J. Frisch, G. W. Trucks, H. B. Schlegel, G. E. Scuseria, 
 M. A. Robb, J. R. Cheeseman, G. Scalmani, V. Barone, 
 G. A. Petersson, H. Nakatsuji, X. Li, M. Caricato, A. V. Marenich, 
 J. Bloino, B. G. Janesko, R. Gomperts, B. Mennucci, H. P. Hratchian, 
 J. V. Ortiz, A. F. Izmaylov, J. L. Sonnenberg, D. Williams-Young, 
 F. Ding, F. Lipparini, F. Egidi, J. Goings, B. Peng, A. Petrone, 
 T. Henderson, D. Ranasinghe, V. G. Zakrzewski, J. Gao, N. Rega, 
 G. Zheng, W. Liang, M. Hada, M. Ehara, K. Toyota, R. Fukuda, 
 J. Hasegawa, M. Ishida, T. Nakajima, Y. Honda, O. Kitao, H. Nakai, 
 T. Vreven, K. Throssell, J. A. Montgomery, Jr., J. E. Peralta, 
 F. Ogliaro, M. J. Bearpark, J. J. Heyd, E. N. Brothers, K. N. Kudin, 
 V. N. Staroverov, T. A. Keith, R. Kobayashi, J. Normand, 
 K. Raghavachari, A. P. Rendell, J. C. Burant, S. S. Iyengar, 
 J. Tomasi, M. Cossi, J. M. Millam, M. Klene, C. Adamo, R. Cammi, 
 J. W. Ochterski, R. L. Martin, K. Morokuma, O. Farkas, 
 J. B. Foresman, and D. J. Fox, Gaussian, Inc., Wallingford CT, 2016.
 
 ******************************************
 Gaussian 16:  ES64L-G16RevA.03 25-Dec-2016
                27-May-2023 
 ******************************************
 %chk=149-91-7-meta13-Cr.chk
 %nprocshared=10
 Will use up to   10 processors via shared memory.
 %mem=20GB
 ----------------------------------------------------------------------
 #p opt m062x/genecp scrf=(smd,solvent=water) iop(7/127=-99) scf=conver
 =6
 ----------------------------------------------------------------------
 1/18=20,19=15,26=3,38=1/1,3;
 2/9=110,12=2,17=6,18=5,40=1/2;
 3/5=7,11=2,16=1,17=8,25=1,30=1,70=32201,71=1,72=1,74=-55/1,2,3;
 4//1;
 5/5=2,6=6,38=5,53=1/2;
 6/7=2,8=2,9=2,10=2,28=1/1;
 7/127=-99/1,2,3,16;
 1/18=20,19=15,26=3/3(2);
 2/9=110/2;
 99//99;
 2/9=110/2;
 3/5=7,6=1,11=2,16=1,17=8,25=1,30=1,70=32205,71=1,72=1,74=-55,82=7/1,2,3;
 4/5=5,16=3,69=1/1;
 5/5=2,6=6,38=5,53=1/2;
 7/127=-99/1,2,3,16;
 1/18=20,19=15,26=3/3(-5);
 2/9=110/2;
 6/7=2,8=2,9=2,10=2,19=2,28=1/1;
 99/9=1/99;
 Leave Link    1 at Sat May 27 00:43:11 2023, MaxMem=  2684354560 cpu:               0.3 elap:               0.0
 (Enter /home/xut/apps/g16/l101.exe)
 -------------------
 Title Card Required
 -------------------
 Symbolic Z-matrix:
 Charge =  3 Multiplicity = 4
 C                    -1.56363   1.69561   0.07269 
 C                    -2.17762   0.48404   0.08476 
 C                    -1.41985  -0.69669   0.08984 
 C                    -0.02155  -0.63102   0.08246 
 C                     0.6105    0.61619   0.07004 
 C                    -0.16337   1.78268   0.06514 
 H                    -3.24623   0.42977   0.09043 
 H                     0.55978  -1.52932   0.08631 
 C                    -2.12636  -2.06499   0.10354 
 O                    -1.42352  -3.16015   0.10826 
 H                    -0.46459  -3.11511   0.1032 
 O                    -3.38336  -2.12404   0.11018 
 O                     2.03805   0.69954   0.06238 
 H                     2.31402   1.50405   0.50758 
 O                     0.47333   3.06305   0.05244 
 H                    -0.08826   3.69521  -0.40208 
 O                    -2.34962   2.89022   0.06763 
 H                    -3.18254   2.72336  -0.37959 
 Cr                    3.37857  -0.84766  -0.08041 
 
 ITRead=  0  0  0  0  0  0  0  0  0  0  0  0  0  0  0  0  0  0  0
 MicOpt= -1 -1 -1 -1 -1 -1 -1 -1 -1 -1 -1 -1 -1 -1 -1 -1 -1 -1 -1
 NAtoms=     19 NQM=       19 NQMF=       0 NMMI=      0 NMMIF=      0
                NMic=       0 NMicF=      0.
                    Isotopes and Nuclear Properties:
 (Nuclear quadrupole moments (NQMom) in fm**2, nuclear magnetic moments (NMagM)
  in nuclear magnetons)

  Atom         1           2           3           4           5           6           7           8           9          10
 IAtWgt=          12          12          12          12          12          12           1           1          12          16
 AtmWgt=  12.0000000  12.0000000  12.0000000  12.0000000  12.0000000  12.0000000   1.0078250   1.0078250  12.0000000  15.9949146
 NucSpn=           0           0           0           0           0           0           1           1           0           0
 AtZEff=  -0.0000000  -0.0000000  -0.0000000  -0.0000000  -0.0000000  -0.0000000  -0.0000000  -0.0000000  -0.0000000  -0.0000000
 NQMom=    0.0000000   0.0000000   0.0000000   0.0000000   0.0000000   0.0000000   0.0000000   0.0000000   0.0000000   0.0000000
 NMagM=    0.0000000   0.0000000   0.0000000   0.0000000   0.0000000   0.0000000   2.7928460   2.7928460   0.0000000   0.0000000
 AtZNuc=   6.0000000   6.0000000   6.0000000   6.0000000   6.0000000   6.0000000   1.0000000   1.0000000   6.0000000   8.0000000

  Atom        11          12          13          14          15          16          17          18          19
 IAtWgt=           1          16          16           1          16           1          16           1          52
 AtmWgt=   1.0078250  15.9949146  15.9949146   1.0078250  15.9949146   1.0078250  15.9949146   1.0078250  51.9405097
 NucSpn=           1           0           0           1           0           1           0           1           0
 AtZEff=  -0.0000000  -0.0000000  -0.0000000  -0.0000000  -0.0000000  -0.0000000  -0.0000000  -0.0000000  -0.0000000
 NQMom=    0.0000000   0.0000000   0.0000000   0.0000000   0.0000000   0.0000000   0.0000000   0.0000000   0.0000000
 NMagM=    2.7928460   0.0000000   0.0000000   2.7928460   0.0000000   2.7928460   0.0000000   2.7928460   0.0000000
 AtZNuc=   1.0000000   8.0000000   8.0000000   1.0000000   8.0000000   1.0000000   8.0000000   1.0000000  24.0000000
 Leave Link  101 at Sat May 27 00:43:11 2023, MaxMem=  2684354560 cpu:               4.7 elap:               0.5
 (Enter /home/xut/apps/g16/l103.exe)

 GradGradGradGradGradGradGradGradGradGradGradGradGradGradGradGradGradGrad
 Berny optimization.
 Initialization pass.
                           ----------------------------
                           !    Initial Parameters    !
                           ! (Angstroms and Degrees)  !
 --------------------------                            --------------------------
 ! Name  Definition              Value          Derivative Info.                !
 --------------------------------------------------------------------------------
 ! R1    R(1,2)                  1.3583         estimate D2E/DX2                !
 ! R2    R(1,6)                  1.403          estimate D2E/DX2                !
 ! R3    R(1,17)                 1.43           estimate D2E/DX2                !
 ! R4    R(2,3)                  1.403          estimate D2E/DX2                !
 ! R5    R(2,7)                  1.07           estimate D2E/DX2                !
 ! R6    R(3,4)                  1.3999         estimate D2E/DX2                !
 ! R7    R(3,9)                  1.54           estimate D2E/DX2                !
 ! R8    R(4,5)                  1.3983         estimate D2E/DX2                !
 ! R9    R(4,8)                  1.07           estimate D2E/DX2                !
 ! R10   R(5,6)                  1.3999         estimate D2E/DX2                !
 ! R11   R(5,13)                 1.43           estimate D2E/DX2                !
 ! R12   R(6,15)                 1.43           estimate D2E/DX2                !
 ! R13   R(9,10)                 1.3013         estimate D2E/DX2                !
 ! R14   R(9,12)                 1.2584         estimate D2E/DX2                !
 ! R15   R(10,11)                0.96           estimate D2E/DX2                !
 ! R16   R(13,14)                0.96           estimate D2E/DX2                !
 ! R17   R(13,19)                2.0521         estimate D2E/DX2                !
 ! R18   R(15,16)                0.96           estimate D2E/DX2                !
 ! R19   R(17,18)                0.96           estimate D2E/DX2                !
 ! A1    A(2,1,6)              120.4341         estimate D2E/DX2                !
 ! A2    A(2,1,17)             119.7829         estimate D2E/DX2                !
 ! A3    A(6,1,17)             119.7829         estimate D2E/DX2                !
 ! A4    A(1,2,3)              120.4341         estimate D2E/DX2                !
 ! A5    A(1,2,7)              119.7829         estimate D2E/DX2                !
 ! A6    A(3,2,7)              119.7829         estimate D2E/DX2                !
 ! A7    A(2,3,4)              120.0009         estimate D2E/DX2                !
 ! A8    A(2,3,9)              119.9995         estimate D2E/DX2                !
 ! A9    A(4,3,9)              119.9995         estimate D2E/DX2                !
 ! A10   A(3,4,5)              119.5649         estimate D2E/DX2                !
 ! A11   A(3,4,8)              120.2175         estimate D2E/DX2                !
 ! A12   A(5,4,8)              120.2175         estimate D2E/DX2                !
 ! A13   A(4,5,6)              119.5649         estimate D2E/DX2                !
 ! A14   A(4,5,13)             120.2175         estimate D2E/DX2                !
 ! A15   A(6,5,13)             120.2175         estimate D2E/DX2                !
 ! A16   A(1,6,5)              120.0009         estimate D2E/DX2                !
 ! A17   A(1,6,15)             119.9995         estimate D2E/DX2                !
 ! A18   A(5,6,15)             119.9995         estimate D2E/DX2                !
 ! A19   A(3,9,10)             120.0            estimate D2E/DX2                !
 ! A20   A(3,9,12)             120.0            estimate D2E/DX2                !
 ! A21   A(10,9,12)            120.0            estimate D2E/DX2                !
 ! A22   A(9,10,11)            120.0            estimate D2E/DX2                !
 ! A23   A(5,13,14)            109.4712         estimate D2E/DX2                !
 ! A24   A(5,13,19)            127.4842         estimate D2E/DX2                !
 ! A25   A(14,13,19)           118.4457         estimate D2E/DX2                !
 ! A26   A(6,15,16)            109.4712         estimate D2E/DX2                !
 ! A27   A(1,17,18)            109.4712         estimate D2E/DX2                !
 ! D1    D(6,1,2,3)             -0.0003         estimate D2E/DX2                !
 ! D2    D(6,1,2,7)            179.9998         estimate D2E/DX2                !
 ! D3    D(17,1,2,3)           179.9997         estimate D2E/DX2                !
 ! D4    D(17,1,2,7)            -0.0002         estimate D2E/DX2                !
 ! D5    D(2,1,6,5)              0.0003         estimate D2E/DX2                !
 ! D6    D(2,1,6,15)          -179.9998         estimate D2E/DX2                !
 ! D7    D(17,1,6,5)          -179.9997         estimate D2E/DX2                !
 ! D8    D(17,1,6,15)            0.0002         estimate D2E/DX2                !
 ! D9    D(2,1,17,18)          -30.0            estimate D2E/DX2                !
 ! D10   D(6,1,17,18)          150.0            estimate D2E/DX2                !
 ! D11   D(1,2,3,4)              0.0001         estimate D2E/DX2                !
 ! D12   D(1,2,3,9)           -179.9999         estimate D2E/DX2                !
 ! D13   D(7,2,3,4)           -180.0            estimate D2E/DX2                !
 ! D14   D(7,2,3,9)              0.0            estimate D2E/DX2                !
 ! D15   D(2,3,4,5)              0.0            estimate D2E/DX2                !
 ! D16   D(2,3,4,8)            179.9999         estimate D2E/DX2                !
 ! D17   D(9,3,4,5)           -179.9999         estimate D2E/DX2                !
 ! D18   D(9,3,4,8)             -0.0001         estimate D2E/DX2                !
 ! D19   D(2,3,9,10)          -179.9999         estimate D2E/DX2                !
 ! D20   D(2,3,9,12)             0.0001         estimate D2E/DX2                !
 ! D21   D(4,3,9,10)             0.0            estimate D2E/DX2                !
 ! D22   D(4,3,9,12)           180.0            estimate D2E/DX2                !
 ! D23   D(3,4,5,6)              0.0            estimate D2E/DX2                !
 ! D24   D(3,4,5,13)           180.0            estimate D2E/DX2                !
 ! D25   D(8,4,5,6)           -179.9999         estimate D2E/DX2                !
 ! D26   D(8,4,5,13)             0.0001         estimate D2E/DX2                !
 ! D27   D(4,5,6,1)             -0.0001         estimate D2E/DX2                !
 ! D28   D(4,5,6,15)           179.9999         estimate D2E/DX2                !
 ! D29   D(13,5,6,1)           179.9999         estimate D2E/DX2                !
 ! D30   D(13,5,6,15)           -0.0001         estimate D2E/DX2                !
 ! D31   D(4,5,13,14)         -150.0            estimate D2E/DX2                !
 ! D32   D(4,5,13,19)            5.2054         estimate D2E/DX2                !
 ! D33   D(6,5,13,14)           30.0            estimate D2E/DX2                !
 ! D34   D(6,5,13,19)         -174.7946         estimate D2E/DX2                !
 ! D35   D(1,6,15,16)          -30.0            estimate D2E/DX2                !
 ! D36   D(5,6,15,16)          150.0            estimate D2E/DX2                !
 ! D37   D(3,9,10,11)            0.0001         estimate D2E/DX2                !
 ! D38   D(12,9,10,11)        -179.9999         estimate D2E/DX2                !
 --------------------------------------------------------------------------------
 Trust Radius=3.00D-01 FncErr=1.00D-07 GrdErr=1.00D-06 EigMax=2.50D+02 EigMin=1.00D-04
 Number of steps in this run=     94 maximum allowed number of steps=    114.
 GradGradGradGradGradGradGradGradGradGradGradGradGradGradGradGradGradGrad

 Leave Link  103 at Sat May 27 00:43:11 2023, MaxMem=  2684354560 cpu:               0.1 elap:               0.0
 (Enter /home/xut/apps/g16/l202.exe)
                          Input orientation:                          
 ---------------------------------------------------------------------
 Center     Atomic      Atomic             Coordinates (Angstroms)
 Number     Number       Type             X           Y           Z
 ---------------------------------------------------------------------
      1          6           0       -1.563626    1.695610    0.072685
      2          6           0       -2.177620    0.484035    0.084760
      3          6           0       -1.419846   -0.696691    0.089844
      4          6           0       -0.021549   -0.631021    0.082464
      5          6           0        0.610503    0.616187    0.070037
      6          6           0       -0.163368    1.782679    0.065139
      7          1           0       -3.246228    0.429773    0.090431
      8          1           0        0.559775   -1.529324    0.086310
      9          6           0       -2.126361   -2.064993    0.103544
     10          8           0       -1.423517   -3.160150    0.108261
     11          1           0       -0.464588   -3.115107    0.103203
     12          8           0       -3.383358   -2.124037    0.110178
     13          8           0        2.038051    0.699537    0.062382
     14          1           0        2.314015    1.504050    0.507581
     15          8           0        0.473330    3.063052    0.052444
     16          1           0       -0.088265    3.695208   -0.402077
     17          8           0       -2.349620    2.890218    0.067632
     18          1           0       -3.182539    2.723360   -0.379586
     19         24           0        3.378566   -0.847659   -0.080414
 ---------------------------------------------------------------------
                    Distance matrix (angstroms):
                    1          2          3          4          5
     1  C    0.000000
     2  C    1.358325   0.000000
     3  C    2.396679   1.402983   0.000000
     4  C    2.791292   2.427344   1.399858   0.000000
     5  C    2.427344   2.791292   2.417925   1.398275   0.000000
     6  C    1.402983   2.396679   2.779681   2.417925   1.399858
     7  H    2.105661   1.070000   2.145831   3.394687   3.861287
     8  H    3.861245   3.398080   2.147601   1.070000   2.146172
     9  C    3.802599   2.549613   1.540000   2.546950   3.831484
    10  O    4.857911   3.721466   2.463531   2.891829   4.289455
    11  H    4.934756   3.986056   2.600275   2.523370   3.883230
    12  O    4.231138   2.873411   2.427572   3.678535   4.843693
    13  O    3.736890   4.221235   3.729244   2.452089   1.430000
    14  H    3.906652   4.625364   4.354250   3.192822   1.970203
    15  O    2.453467   3.698636   4.209654   3.727195   2.450769
    16  H    2.529918   3.861871   4.615612   4.353791   3.192419
    17  O    1.430000   2.412383   3.705521   4.221286   3.732767
    18  H    1.970203   2.498011   3.876107   4.632194   4.362282
    19  Cr   5.560298   5.715933   4.803805   3.410901   3.134909
                    6          7          8          9         10
     6  C    0.000000
     7  H    3.366752   0.000000
     8  H    3.390095   4.280623   0.000000
     9  C    4.319652   2.734617   2.739081   0.000000
    10  O    5.101117   4.026182   2.567786   1.301300   0.000000
    11  H    4.907187   4.505980   1.887939   1.965764   0.960000
    12  O    5.062884   2.557565   3.987800   1.258400   2.216869
    13  O    2.453457   5.291235   2.674639   4.998665   5.184761
    14  H    2.531959   5.678415   3.529332   5.711239   5.990273
    15  O    1.430000   4.557490   4.593314   5.749595   6.506104
    16  H    1.970203   4.569285   5.287174   6.131020   7.002806
    17  O    2.450785   2.618819   5.291245   4.960368   6.120970
    18  H    3.193440   2.342118   5.683951   4.927195   6.160183
    19  Cr   4.414200   6.748994   2.904831   5.640919   5.333218
                   11         12         13         14         15
    11  H    0.000000
    12  O    3.082448   0.000000
    13  O    4.562497   6.112817   0.000000
    14  H    5.405624   6.766166   0.960000   0.000000
    15  O    6.249153   6.463998   2.834546   2.454742   0.000000
    16  H    6.839395   6.706986   3.702835   3.376330   0.960000
    17  O    6.294326   5.119881   4.904158   4.885132   2.828277
    18  H    6.458176   4.876214   5.616561   5.699640   3.696948
    19  Cr   4.465968   6.883972   2.052117   2.647554   4.873572
                   16         17         18         19
    16  H    0.000000
    17  O    2.445887   0.000000
    18  H    3.243383   0.960000   0.000000
    19  Cr   5.723637   6.841473   7.475947   0.000000
 Stoichiometry    C7H6CrO5(3+,4)
 Framework group  C1[X(C7H6CrO5)]
 Deg. of freedom    51
 Full point group                 C1      NOp   1
 Largest Abelian subgroup         C1      NOp   1
 Largest concise Abelian subgroup C1      NOp   1
                         Standard orientation:                         
 ---------------------------------------------------------------------
 Center     Atomic      Atomic             Coordinates (Angstroms)
 Number     Number       Type             X           Y           Z
 ---------------------------------------------------------------------
      1          6           0        1.571453    1.664547   -0.006448
      2          6           0        2.171323    0.445883    0.001272
      3          6           0        1.400048   -0.725984   -0.013745
      4          6           0        0.002780   -0.644056   -0.036854
      5          6           0       -0.614732    0.610451   -0.044804
      6          6           0        0.172472    1.767896   -0.029548
      7          1           0        3.239097    0.379196    0.018923
      8          1           0       -0.588815   -1.535562   -0.048361
      9          6           0        2.090609   -2.102445   -0.004808
     10          8           0        1.375242   -3.189385   -0.018739
     11          1           0        0.417019   -3.133192   -0.034588
     12          8           0        3.346679   -2.176104    0.015965
     13          8           0       -2.041041    0.710397   -0.068363
     14          1           0       -2.297929    1.515522   -0.523755
     15          8           0       -0.449302    3.055619   -0.037509
     16          1           0        0.109769    3.683784    0.425577
     17          8           0        2.371103    2.849966    0.009072
     18          1           0        3.192210    2.675994    0.475031
     19         24           0       -3.402355   -0.820310    0.053890
 ---------------------------------------------------------------------
 Rotational constants (GHZ):           0.6838242           0.4342170           0.2658540
 Leave Link  202 at Sat May 27 00:43:11 2023, MaxMem=  2684354560 cpu:               0.1 elap:               0.0
 (Enter /home/xut/apps/g16/l301.exe)
 General basis read from cards:  (5D, 7F)
 Centers:      19
 LanL2DZ
 ****
 Centers:       1      2      3      4      5      6      9      7      8     11
 Centers:      14     16     18     10     12     13     15     17
 6-311++g(d,p)
 ****
 ======================================================================================================
                                       Pseudopotential Parameters
 ======================================================================================================
  Center     Atomic      Valence      Angular      Power
  Number     Number     Electrons     Momentum     of R      Exponent        Coefficient   SO-Coeffient
 ======================================================================================================
    1          6
                                   No pseudopotential on this center.
    2          6
                                   No pseudopotential on this center.
    3          6
                                   No pseudopotential on this center.
    4          6
                                   No pseudopotential on this center.
    5          6
                                   No pseudopotential on this center.
    6          6
                                   No pseudopotential on this center.
    7          1
                                   No pseudopotential on this center.
    8          1
                                   No pseudopotential on this center.
    9          6
                                   No pseudopotential on this center.
   10          8
                                   No pseudopotential on this center.
   11          1
                                   No pseudopotential on this center.
   12          8
                                   No pseudopotential on this center.
   13          8
                                   No pseudopotential on this center.
   14          1
                                   No pseudopotential on this center.
   15          8
                                   No pseudopotential on this center.
   16          1
                                   No pseudopotential on this center.
   17          8
                                   No pseudopotential on this center.
   18          1
                                   No pseudopotential on this center.
   19         24           14
                                      D and up 
                                                     1      329.2720539      -10.00000000    0.00000000
                                                     2       59.5487597      -57.94093980    0.00000000
                                                     2       14.8265966      -10.26232850    0.00000000
                                      S - D
                                                     0      100.0260653        3.00000000    0.00000000
                                                     1       67.8468124       25.25345990    0.00000000
                                                     2       34.6771006      210.64723660    0.00000000
                                                     2        7.6757005      235.28195870    0.00000000
                                                     2        7.2077427     -152.53434610    0.00000000
                                      P - D
                                                     0       47.9723321        5.00000000    0.00000000
                                                     1       59.6224873        5.63902660    0.00000000
                                                     2       26.0432600      164.83621980    0.00000000
                                                     2        6.5582692      106.01680180    0.00000000
                                                     2        6.1268236      -69.85854680    0.00000000
 ======================================================================================================
 Ernie: Thresh=  0.10000D-02 Tol=  0.10000D-05 Strict=F.
 Ernie:  1 primitive shells out of 216 were deleted.
 There are   342 symmetry adapted cartesian basis functions of A   symmetry.
 There are   328 symmetry adapted basis functions of A   symmetry.
   328 basis functions,   538 primitive gaussians,   342 cartesian basis functions
    51 alpha electrons       48 beta electrons
       nuclear repulsion energy       829.2659916196 Hartrees.
 IExCor= 4336 DFT=T Ex+Corr=M062X ExCW=0 ScaHFX=  0.540000
 ScaDFX=  1.000000  1.000000  1.000000  1.000000 ScalE2=  1.000000  1.000000
 IRadAn=      5 IRanWt=     -1 IRanGd=            0 ICorTp=0 IEmpDi=  4
 NAtoms=   19 NActive=   19 NUniq=   19 SFac= 1.00D+00 NAtFMM=   60 NAOKFM=F Big=F
 Integral buffers will be    131072 words long.
 Raffenetti 2 integral format.
 Two-electron integral symmetry is turned on.
 ------------------------------------------------------------------------------
 Polarizable Continuum Model (PCM)
 =================================
 Model                : PCM.
 Atomic radii         : SMD-Coulomb.
 Polarization charges : Total charges.
 Charge compensation  : None.
 Solution method      : On-the-fly selection.
 Cavity type          : VdW (van der Waals Surface) (Alpha=1.000).
 Cavity algorithm     : GePol (No added spheres)
                        Default sphere list used, NSphG=   19.
                        Lebedev-Laikov grids with approx.  5.0 points / Ang**2.
                        Smoothing algorithm: York/Karplus (Gamma=1.0000).
                        Polarization charges: spherical gaussians, with
                                              point-specific exponents (IZeta= 3).
                        Self-potential: point-specific (ISelfS= 7).
                        Self-field    : sphere-specific E.n sum rule (ISelfD= 2).
 1st derivatives      : Analytical E(r).r(x)/FMM algorithm (CHGder, D1EAlg=3).
                        Cavity 1st derivative terms included.
 Solvent              : Water, Eps=  78.355300 Eps(inf)=   1.777849
 ------------------------------------------------------------------------------
 Spheres list:
 ISph  on   Nord     Re0    Alpha      Xe            Ye            Ze
    1   C      1    1.8500  1.000      1.571453      1.664547     -0.006448
    2   C      2    1.8500  1.000      2.171323      0.445883      0.001272
    3   C      3    1.8500  1.000      1.400048     -0.725984     -0.013745
    4   C      4    1.8500  1.000      0.002780     -0.644056     -0.036854
    5   C      5    1.8500  1.000     -0.614732      0.610451     -0.044804
    6   C      6    1.8500  1.000      0.172472      1.767896     -0.029548
    7   H      7    1.2000  1.000      3.239097      0.379196      0.018923
    8   H      8    1.2000  1.000     -0.588815     -1.535562     -0.048361
    9   C      9    1.8500  1.000      2.090609     -2.102445     -0.004808
   10   O     10    1.5200  1.000      1.375242     -3.189385     -0.018739
   11   H     11    1.2000  1.000      0.417019     -3.133192     -0.034588
   12   O     12    1.5200  1.000      3.346679     -2.176104      0.015965
   13   O     13    1.5200  1.000     -2.041041      0.710397     -0.068363
   14   H     14    1.2000  1.000     -2.297929      1.515522     -0.523755
   15   O     15    1.5200  1.000     -0.449302      3.055619     -0.037509
   16   H     16    1.2000  1.000      0.109769      3.683784      0.425577
   17   O     17    1.5200  1.000      2.371103      2.849966      0.009072
   18   H     18    1.2000  1.000      3.192210      2.675994      0.475031
   19  Cr     19    1.5115  1.000     -3.402355     -0.820310      0.053890
 ------------------------------------------------------------------------------
 GePol: Number of generator spheres                  =      19
 GePol: Total number of spheres                      =      19
 GePol: Number of exposed spheres                    =      19 (100.00%)
 GePol: Number of points                             =    1488
 GePol: Average weight of points                     =       0.13
 GePol: Minimum weight of points                     =   0.15D-07
 GePol: Maximum weight of points                     =    0.21991
 GePol: Number of points with low weight             =      77
 GePol: Fraction of low-weight points (<1% of avg)   =       5.17%
 GePol: Cavity surface area                          =    191.977 Ang**2
 GePol: Cavity volume                                =    157.601 Ang**3
 ------------------------------------------------------------------------------
 Atomic radii for non-electrostatic terms: SMD-CDS.
 ------------------------------------------------------------------------------
 PCM non-electrostatic energy =         0.0090419382 Hartrees.
 Nuclear repulsion after PCM non-electrostatic terms =      829.2750335577 Hartrees.
 Leave Link  301 at Sat May 27 00:43:11 2023, MaxMem=  2684354560 cpu:               0.8 elap:               0.1
 (Enter /home/xut/apps/g16/l302.exe)
 NPDir=0 NMtPBC=     1 NCelOv=     1 NCel=       1 NClECP=     1 NCelD=      1
         NCelK=      1 NCelE2=     1 NClLst=     1 CellRange=     0.0.
 One-electron integrals computed using PRISM.
 One-electron integral symmetry used in STVInt
   1 Symmetry operations used in ECPInt.
 ECPInt:  NShTT=    6105 NPrTT=   23469 LenC2=    5802 LenP2D=   15807.
 LDataN:  DoStor=T MaxTD1= 4 Len=   56
 NBasis=   328 RedAO= T EigKep=  1.37D-06  NBF=   328
 NBsUse=   327 1.00D-06 EigRej=  7.31D-07 NBFU=   327
 Precomputing XC quadrature grid using
 IXCGrd= 4 IRadAn=           5 IRanWt=          -1 IRanGd=           0 AccXCQ= 0.00D+00.
 Generated NRdTot=       0 NPtTot=           0 NUsed=           0 NTot=          32
 NSgBfM=   342   342   342   342   342 MxSgAt=    19 MxSgA2=    19.
 Leave Link  302 at Sat May 27 00:43:12 2023, MaxMem=  2684354560 cpu:               2.8 elap:               0.3
 (Enter /home/xut/apps/g16/l303.exe)
 DipDrv:  MaxL=1.
 Leave Link  303 at Sat May 27 00:43:12 2023, MaxMem=  2684354560 cpu:               0.4 elap:               0.1
 (Enter /home/xut/apps/g16/l401.exe)
 ExpMin= 1.90D-02 ExpMax= 8.59D+03 ExpMxC= 1.30D+03 IAcc=3 IRadAn=         5 AccDes= 0.00D+00
 Harris functional with IExCor= 1009 and IRadAn=       5 diagonalized for initial guess.
 HarFok:  IExCor= 1009 AccDes= 0.00D+00 IRadAn=         5 IDoV= 1 UseB2=F ITyADJ=14
 ICtDFT=  3500011 ScaDFX=  1.000000  1.000000  1.000000  1.000000
 FoFCou: FMM=F IPFlag=           0 FMFlag=      100000 FMFlg1=           0
         NFxFlg=           0 DoJE=T BraDBF=F KetDBF=T FulRan=T
         wScrn=  0.000000 ICntrl=       500 IOpCl=  0 I1Cent=   200000004 NGrid=           0
         NMat0=    1 NMatS0=      1 NMatT0=    0 NMatD0=    1 NMtDS0=    0 NMtDT0=    0
 Petite list used in FoFCou.
 Harris En= -732.136929598285    
 JPrj=0 DoOrth=F DoCkMO=F.
 Initial guess <Sx>= 0.0000 <Sy>= 0.0000 <Sz>= 1.5000 <S**2>= 3.7500 S= 1.5000
 Leave Link  401 at Sat May 27 00:43:13 2023, MaxMem=  2684354560 cpu:              10.7 elap:               1.1
 (Enter /home/xut/apps/g16/l502.exe)
 Integral symmetry usage will be decided dynamically.
 UHF open shell SCF:
 Using DIIS extrapolation, IDIIS=  1040.
 NGot=  2684354560 LenX=  2684113999 LenY=  2683996594
 Requested convergence on RMS density matrix=1.00D-06 within 128 cycles.
 Requested convergence on MAX density matrix=1.00D-04.
 Requested convergence on             energy=1.00D-04.
 No special actions if energy rises.
 Fock matrices will be formed incrementally for  20 cycles.

 Cycle   1  Pass 1  IDiag  1:
 FoFJK:  IHMeth= 1 ICntrl=       0 DoSepK=F KAlg= 0 I1Cent=           0 FoldK=F
 IRaf= 910000000 NMat=       1 IRICut=       1 DoRegI=T DoRafI=F ISym2E= 0 IDoP0=0 IntGTp=1.
 FoFCou: FMM=F IPFlag=           0 FMFlag=      100000 FMFlg1=           0
         NFxFlg=           0 DoJE=F BraDBF=F KetDBF=F FulRan=T
         wScrn=  0.000000 ICntrl=         0 IOpCl=  1 I1Cent=           0 NGrid=           0
         NMat0=    1 NMatS0=      1 NMatT0=    0 NMatD0=    1 NMtDS0=    0 NMtDT0=    0
 Symmetry not used in FoFCou.
 Inv3:  Mode=1 IEnd=     6642432.
 Iteration    1 A*A^-1 deviation from unit magnitude is 3.33D-15 for    730.
 Iteration    1 A*A^-1 deviation from orthogonality  is 2.09D-15 for    829    481.
 Iteration    1 A^-1*A deviation from unit magnitude is 3.11D-15 for    617.
 Iteration    1 A^-1*A deviation from orthogonality  is 1.45D-15 for    545    320.
 E= -728.314340743226    
 DIIS: error= 4.01D-02 at cycle   1 NSaved=   1.
 NSaved= 1 IEnMin= 1 EnMin= -728.314340743226     IErMin= 1 ErrMin= 4.01D-02
 ErrMax= 4.01D-02  0.00D+00 EMaxC= 1.00D-01 BMatC= 4.47D+00 BMatP= 4.47D+00
 IDIUse=3 WtCom= 5.99D-01 WtEn= 4.01D-01
 Coeff-Com:  0.100D+01
 Coeff-En:   0.100D+01
 Coeff:      0.100D+01
 Gap=     0.353 Goal=   None    Shift=    0.000
 Gap=     0.290 Goal=   None    Shift=    0.000
 GapD=    0.290 DampG=1.000 DampE=0.250 DampFc=0.2500 IDamp=-1.
 Damping current iteration by 2.50D-01
 RMSDP=1.27D+00 MaxDP=1.38D+02              OVMax= 1.00D+00

 Cycle   2  Pass 1  IDiag  1:
 RMSU=  2.65D-01    CP:  2.08D+00
 E= -730.558392725999     Delta-E=       -2.244051982773 Rises=F Damp=T
 DIIS: error= 1.32D-02 at cycle   2 NSaved=   2.
 NSaved= 2 IEnMin= 2 EnMin= -730.558392725999     IErMin= 2 ErrMin= 1.32D-02
 ErrMax= 1.32D-02  0.00D+00 EMaxC= 1.00D-01 BMatC= 6.15D-01 BMatP= 4.47D+00
 IDIUse=3 WtCom= 8.68D-01 WtEn= 1.32D-01
 Coeff-Com: -0.218D+00 0.122D+01
 Coeff-En:   0.000D+00 0.100D+01
 Coeff:     -0.190D+00 0.119D+01
 Gap=     0.120 Goal=   None    Shift=    0.000
 Gap=    -0.175 Goal=   None    Shift=    0.000
 RMSDP=3.43D-01 MaxDP=4.68D+01 DE=-2.24D+00 OVMax= 9.69D-01

 Cycle   3  Pass 1  IDiag  1:
 RMSU=  4.68D-02    CP:  6.27D-01  6.92D-02
 E= -731.970206213775     Delta-E=       -1.411813487777 Rises=F Damp=F
 DIIS: error= 1.96D-02 at cycle   3 NSaved=   3.
 NSaved= 3 IEnMin= 3 EnMin= -731.970206213775     IErMin= 2 ErrMin= 1.32D-02
 ErrMax= 1.96D-02  0.00D+00 EMaxC= 1.00D-01 BMatC= 7.81D-01 BMatP= 6.15D-01
 IDIUse=2 WtCom= 0.00D+00 WtEn= 1.00D+00
 Coeff-En:   0.000D+00 0.000D+00 0.100D+01
 Coeff:      0.000D+00 0.000D+00 0.100D+01
 Gap=     0.359 Goal=   None    Shift=    0.000
 Gap=     0.079 Goal=   None    Shift=    0.000
 RMSDP=3.10D-02 MaxDP=3.37D+00 DE=-1.41D+00 OVMax= 9.97D-01

 Cycle   4  Pass 1  IDiag  1:
 RMSU=  2.70D-02    CP:  6.09D-01  9.67D-02  7.20D-01
 E= -727.988186396289     Delta-E=        3.982019817487 Rises=F Damp=F
 DIIS: error= 1.11D-01 at cycle   4 NSaved=   4.
 NSaved= 4 IEnMin= 3 EnMin= -731.970206213775     IErMin= 2 ErrMin= 1.32D-02
 ErrMax= 1.11D-01  0.00D+00 EMaxC= 1.00D-01 BMatC= 8.87D+00 BMatP= 6.15D-01
 IDIUse=2 WtCom= 0.00D+00 WtEn= 1.00D+00
 Coeff-En:   0.000D+00 0.000D+00 0.930D+00 0.705D-01
 Coeff:      0.000D+00 0.000D+00 0.930D+00 0.705D-01
 Gap=     0.020 Goal=   None    Shift=    0.000
 Gap=     0.017 Goal=   None    Shift=    0.000
 RMSDP=2.60D-02 MaxDP=3.56D+00 DE= 3.98D+00 OVMax= 9.98D-01

 Cycle   5  Pass 1  IDiag  1:
 RMSU=  1.04D-02    CP:  5.56D-01  6.08D-02  8.06D-01  2.69D-01
 E= -732.051348874809     Delta-E=       -4.063162478520 Rises=F Damp=F
 DIIS: error= 1.34D-02 at cycle   5 NSaved=   5.
 NSaved= 5 IEnMin= 5 EnMin= -732.051348874809     IErMin= 2 ErrMin= 1.32D-02
 ErrMax= 1.34D-02  0.00D+00 EMaxC= 1.00D-01 BMatC= 6.30D-01 BMatP= 6.15D-01
 IDIUse=3 WtCom= 8.66D-01 WtEn= 1.34D-01
 Coeff-Com: -0.703D-01 0.184D+00 0.468D+00 0.220D-01 0.396D+00
 Coeff-En:   0.000D+00 0.000D+00 0.357D+00 0.000D+00 0.643D+00
 Coeff:     -0.609D-01 0.160D+00 0.453D+00 0.190D-01 0.429D+00
 Gap=     0.077 Goal=   None    Shift=    0.000
 Gap=     0.123 Goal=   None    Shift=    0.000
 RMSDP=8.72D-03 MaxDP=1.24D+00 DE=-4.06D+00 OVMax= 1.19D-01

 Cycle   6  Pass 1  IDiag  1:
 RMSU=  4.69D-03    CP:  5.91D-01  6.00D-02  8.32D-01  1.82D-01  6.09D-01
 E= -732.158968863121     Delta-E=       -0.107619988312 Rises=F Damp=F
 DIIS: error= 6.54D-03 at cycle   6 NSaved=   6.
 NSaved= 6 IEnMin= 6 EnMin= -732.158968863121     IErMin= 6 ErrMin= 6.54D-03
 ErrMax= 6.54D-03  0.00D+00 EMaxC= 1.00D-01 BMatC= 3.56D-02 BMatP= 6.15D-01
 IDIUse=3 WtCom= 9.35D-01 WtEn= 6.54D-02
 Coeff-Com: -0.362D-01 0.644D-01-0.758D-01 0.146D-01 0.337D-01 0.999D+00
 Coeff-En:   0.000D+00 0.000D+00 0.000D+00 0.000D+00 0.000D+00 0.100D+01
 Coeff:     -0.339D-01 0.602D-01-0.709D-01 0.137D-01 0.315D-01 0.999D+00
 Gap=     0.056 Goal=   None    Shift=    0.000
 Gap=     0.123 Goal=   None    Shift=    0.000
 RMSDP=3.69D-03 MaxDP=6.85D-01 DE=-1.08D-01 OVMax= 1.90D-01

 Cycle   7  Pass 1  IDiag  1:
 RMSU=  2.01D-03    CP:  6.00D-01  5.87D-02  7.94D-01  2.51D-01  6.09D-01
                    CP:  1.17D+00
 E= -732.179551583211     Delta-E=       -0.020582720090 Rises=F Damp=F
 DIIS: error= 4.39D-03 at cycle   7 NSaved=   7.
 NSaved= 7 IEnMin= 7 EnMin= -732.179551583211     IErMin= 7 ErrMin= 4.39D-03
 ErrMax= 4.39D-03  0.00D+00 EMaxC= 1.00D-01 BMatC= 8.54D-03 BMatP= 3.56D-02
 IDIUse=3 WtCom= 9.56D-01 WtEn= 4.39D-02
 Coeff-Com: -0.723D-02 0.920D-02-0.115D+00 0.657D-02-0.253D-01 0.506D+00
 Coeff-Com:  0.626D+00
 Coeff-En:   0.000D+00 0.000D+00 0.000D+00 0.000D+00 0.000D+00 0.000D+00
 Coeff-En:   0.100D+01
 Coeff:     -0.691D-02 0.880D-02-0.110D+00 0.628D-02-0.242D-01 0.484D+00
 Coeff:      0.642D+00
 Gap=     0.051 Goal=   None    Shift=    0.000
 Gap=     0.146 Goal=   None    Shift=    0.000
 RMSDP=2.89D-03 MaxDP=4.13D-01 DE=-2.06D-02 OVMax= 2.25D-01

 Cycle   8  Pass 1  IDiag  1:
 RMSU=  1.54D-03    CP:  5.88D-01  5.65D-02  7.89D-01  2.23D-01  6.97D-01
                    CP:  1.16D+00  6.48D-01
 E= -732.195937252486     Delta-E=       -0.016385669275 Rises=F Damp=F
 DIIS: error= 4.41D-03 at cycle   8 NSaved=   8.
 NSaved= 8 IEnMin= 8 EnMin= -732.195937252486     IErMin= 7 ErrMin= 4.39D-03
 ErrMax= 4.41D-03  0.00D+00 EMaxC= 1.00D-01 BMatC= 1.46D-02 BMatP= 8.54D-03
 IDIUse=3 WtCom= 9.56D-01 WtEn= 4.39D-02
 Coeff-Com:  0.199D-02 0.189D-04-0.512D-01 0.159D-02 0.265D-01 0.430D+00
 Coeff-Com:  0.205D+00 0.387D+00
 Coeff-En:   0.000D+00 0.000D+00 0.000D+00 0.000D+00 0.000D+00 0.000D+00
 Coeff-En:   0.000D+00 0.100D+01
 Coeff:      0.190D-02 0.181D-04-0.490D-01 0.152D-02 0.253D-01 0.411D+00
 Coeff:      0.196D+00 0.414D+00
 Gap=     0.055 Goal=   None    Shift=    0.000
 Gap=     0.168 Goal=   None    Shift=    0.000
 RMSDP=2.69D-03 MaxDP=3.97D-01 DE=-1.64D-02 OVMax= 1.48D-01

 Cycle   9  Pass 1  IDiag  1:
 RMSU=  7.12D-04    CP:  5.79D-01  5.43D-02  7.94D-01  1.74D-01  7.62D-01
                    CP:  1.22D+00  1.54D-01  1.63D+00
 E= -732.204814595990     Delta-E=       -0.008877343504 Rises=F Damp=F
 DIIS: error= 6.30D-03 at cycle   9 NSaved=   9.
 NSaved= 9 IEnMin= 9 EnMin= -732.204814595990     IErMin= 7 ErrMin= 4.39D-03
 ErrMax= 6.30D-03  0.00D+00 EMaxC= 1.00D-01 BMatC= 2.69D-02 BMatP= 8.54D-03
 IDIUse=3 WtCom= 9.56D-01 WtEn= 4.39D-02
 Coeff-Com:  0.274D-02-0.199D-02-0.558D-01 0.128D-02 0.249D-01 0.475D+00
 Coeff-Com:  0.200D+00 0.155D+00 0.199D+00
 Coeff-En:   0.000D+00 0.000D+00 0.000D+00 0.000D+00 0.000D+00 0.000D+00
 Coeff-En:   0.000D+00 0.000D+00 0.100D+01
 Coeff:      0.262D-02-0.190D-02-0.534D-01 0.123D-02 0.238D-01 0.454D+00
 Coeff:      0.191D+00 0.148D+00 0.234D+00
 Gap=     0.058 Goal=   None    Shift=    0.000
 Gap=     0.176 Goal=   None    Shift=    0.000
 RMSDP=1.01D-03 MaxDP=1.12D-01 DE=-8.88D-03 OVMax= 2.78D-02

 Cycle  10  Pass 1  IDiag  1:
 RMSU=  1.48D-04    CP:  5.77D-01  5.34D-02  7.95D-01  1.53D-01  7.80D-01
                    CP:  1.30D+00 -3.47D-02  1.81D+00  1.48D+00
 E= -732.207187274729     Delta-E=       -0.002372678739 Rises=F Damp=F
 DIIS: error= 6.43D-03 at cycle  10 NSaved=  10.
 NSaved=10 IEnMin=10 EnMin= -732.207187274729     IErMin= 7 ErrMin= 4.39D-03
 ErrMax= 6.43D-03  0.00D+00 EMaxC= 1.00D-01 BMatC= 2.74D-02 BMatP= 8.54D-03
 IDIUse=3 WtCom= 9.56D-01 WtEn= 4.39D-02
 Coeff-Com:  0.311D-02-0.297D-02-0.642D-01 0.117D-02 0.186D-01 0.505D+00
 Coeff-Com:  0.264D+00-0.627D-01-0.109D+01 0.143D+01
 Coeff-En:   0.000D+00 0.000D+00 0.000D+00 0.000D+00 0.000D+00 0.000D+00
 Coeff-En:   0.000D+00 0.000D+00 0.000D+00 0.100D+01
 Coeff:      0.297D-02-0.284D-02-0.614D-01 0.112D-02 0.178D-01 0.482D+00
 Coeff:      0.253D+00-0.600D-01-0.104D+01 0.141D+01
 Gap=     0.058 Goal=   None    Shift=    0.000
 Gap=     0.190 Goal=   None    Shift=    0.000
 RMSDP=1.71D-03 MaxDP=1.61D-01 DE=-2.37D-03 OVMax= 5.27D-02

 Cycle  11  Pass 1  IDiag  1:
 RMSU=  9.94D-05    CP:  5.74D-01  5.20D-02  7.97D-01  1.18D-01  8.03D-01
                    CP:  1.45D+00 -3.50D-01  2.10D+00  2.39D+00  2.88D+00
 E= -732.211401245880     Delta-E=       -0.004213971152 Rises=F Damp=F
 DIIS: error= 6.77D-03 at cycle  11 NSaved=  11.
 NSaved=11 IEnMin=11 EnMin= -732.211401245880     IErMin= 7 ErrMin= 4.39D-03
 ErrMax= 6.77D-03  0.00D+00 EMaxC= 1.00D-01 BMatC= 2.96D-02 BMatP= 8.54D-03
 IDIUse=3 WtCom= 9.56D-01 WtEn= 4.39D-02
 Coeff-Com:  0.294D-02-0.274D-02-0.595D-01 0.109D-02 0.221D-01 0.482D+00
 Coeff-Com:  0.260D+00 0.804D-01-0.982D+00 0.760D+00 0.436D+00
 Coeff-En:   0.000D+00 0.000D+00 0.000D+00 0.000D+00 0.000D+00 0.000D+00
 Coeff-En:   0.000D+00 0.000D+00 0.000D+00 0.000D+00 0.100D+01
 Coeff:      0.281D-02-0.262D-02-0.569D-01 0.104D-02 0.211D-01 0.461D+00
 Coeff:      0.248D+00 0.768D-01-0.939D+00 0.727D+00 0.460D+00
 Gap=     0.059 Goal=   None    Shift=    0.000
 Gap=     0.192 Goal=   None    Shift=    0.000
 RMSDP=3.33D-04 MaxDP=3.59D-02 DE=-4.21D-03 OVMax= 1.88D-02

 Cycle  12  Pass 1  IDiag  1:
 RMSU=  5.24D-05    CP:  5.74D-01  5.18D-02  7.98D-01  1.12D-01  8.08D-01
                    CP:  1.48D+00 -4.21D-01  2.16D+00  2.55D+00  3.00D+00
                    CP:  1.43D+00
 E= -732.212185057811     Delta-E=       -0.000783811931 Rises=F Damp=F
 DIIS: error= 6.80D-03 at cycle  12 NSaved=  12.
 NSaved=12 IEnMin=12 EnMin= -732.212185057811     IErMin= 7 ErrMin= 4.39D-03
 ErrMax= 6.80D-03  0.00D+00 EMaxC= 1.00D-01 BMatC= 2.97D-02 BMatP= 8.54D-03
 IDIUse=3 WtCom= 9.56D-01 WtEn= 4.39D-02
 Coeff-Com:  0.285D-02-0.263D-02-0.593D-01 0.106D-02 0.218D-01 0.481D+00
 Coeff-Com:  0.257D+00 0.825D-01-0.708D+00 0.516D+00-0.323D+00 0.731D+00
 Coeff-En:   0.000D+00 0.000D+00 0.000D+00 0.000D+00 0.000D+00 0.000D+00
 Coeff-En:   0.000D+00 0.000D+00 0.000D+00 0.000D+00 0.000D+00 0.100D+01
 Coeff:      0.273D-02-0.252D-02-0.567D-01 0.102D-02 0.208D-01 0.460D+00
 Coeff:      0.246D+00 0.789D-01-0.677D+00 0.494D+00-0.309D+00 0.743D+00
 Gap=     0.059 Goal=   None    Shift=    0.000
 Gap=     0.192 Goal=   None    Shift=    0.000
 RMSDP=7.48D-05 MaxDP=9.63D-03 DE=-7.84D-04 OVMax= 1.61D-02

 Cycle  13  Pass 1  IDiag  1:
 RMSU=  3.22D-05    CP:  5.74D-01  5.19D-02  7.98D-01  1.13D-01  8.07D-01
                    CP:  1.48D+00 -4.21D-01  2.15D+00  2.55D+00  3.00D+00
                    CP:  1.77D+00  1.57D+00
 E= -732.212114926167     Delta-E=        0.000070131644 Rises=F Damp=F
 DIIS: error= 6.82D-03 at cycle  13 NSaved=  13.
 NSaved=13 IEnMin=12 EnMin= -732.212185057811     IErMin= 7 ErrMin= 4.39D-03
 ErrMax= 6.82D-03  0.00D+00 EMaxC= 1.00D-01 BMatC= 2.99D-02 BMatP= 8.54D-03
 IDIUse=3 WtCom= 9.56D-01 WtEn= 4.39D-02
 Rare condition: small coef for last iteration:  0.000D+00
 Coeff-Com:  0.295D-02-0.206D-02-0.412D-01 0.579D-03 0.359D-01 0.390D+00
 Coeff-Com:  0.189D+00 0.721D+00-0.650D+00-0.170D+01 0.528D+00 0.922D+01
 Coeff-Com: -0.770D+01
 Coeff-En:   0.000D+00 0.000D+00 0.000D+00 0.000D+00 0.000D+00 0.000D+00
 Coeff-En:   0.000D+00 0.000D+00 0.000D+00 0.000D+00 0.000D+00 0.000D+00
 Coeff-En:   0.100D+01
 Coeff:      0.295D-02-0.206D-02-0.412D-01 0.579D-03 0.359D-01 0.390D+00
 Coeff:      0.189D+00 0.721D+00-0.650D+00-0.170D+01 0.528D+00 0.922D+01
 Coeff:     -0.770D+01
 Gap=     0.061 Goal=   None    Shift=    0.000
 Gap=     0.195 Goal=   None    Shift=    0.000
 RMSDP=6.68D-04 MaxDP=5.46D-02 DE= 7.01D-05 OVMax= 1.18D-01

 Cycle  14  Pass 1  IDiag  1:
 RMSU=  2.69D-04    CP:  5.72D-01  5.13D-02  7.98D-01  1.01D-01  8.17D-01
                    CP:  1.49D+00 -4.34D-01  2.22D+00  2.72D+00  3.00D+00
                    CP:  1.53D-01 -3.00D+00 -3.00D+00
 E= -732.214081790057     Delta-E=       -0.001966863891 Rises=F Damp=F
 DIIS: error= 7.27D-03 at cycle  14 NSaved=  14.
 NSaved=14 IEnMin=14 EnMin= -732.214081790057     IErMin= 7 ErrMin= 4.39D-03
 ErrMax= 7.27D-03  0.00D+00 EMaxC= 1.00D-01 BMatC= 3.36D-02 BMatP= 8.54D-03
 IDIUse=3 WtCom= 9.56D-01 WtEn= 4.39D-02
 Large coefficients: NSaved= 14 BigCof=   18.00 CofMax=   10.00 Det=-4.40D-07
 Inversion failed.  Reducing to 13 matrices.
 Large coefficients: NSaved= 13 BigCof=   18.08 CofMax=   10.00 Det=-4.41D-07
 Inversion failed.  Reducing to 12 matrices.
 Large coefficients: NSaved= 12 BigCof=   17.30 CofMax=   10.00 Det=-4.56D-07
 Inversion failed.  Reducing to 11 matrices.
 Large coefficients: NSaved= 11 BigCof=   17.26 CofMax=   10.00 Det=-4.56D-07
 Inversion failed.  Reducing to 10 matrices.
 Large coefficients: NSaved= 10 BigCof=   19.56 CofMax=   10.00 Det=-4.62D-07
 Inversion failed.  Reducing to  9 matrices.
 Large coefficients: NSaved=  9 BigCof=   35.16 CofMax=   10.00 Det=-5.17D-07
 Inversion failed.  Reducing to  8 matrices.
 Large coefficients: NSaved=  8 BigCof=   35.35 CofMax=   10.00 Det=-5.80D-07
 Inversion failed.  Reducing to  7 matrices.
 Large coefficients: NSaved=  7 BigCof=   43.22 CofMax=   10.00 Det=-7.02D-07
 Inversion failed.  Reducing to  6 matrices.
 Large coefficients: NSaved=  6 BigCof=   18.08 CofMax=   10.00 Det=-7.58D-07
 Inversion failed.  Reducing to  5 matrices.
 Large coefficients: NSaved=  5 BigCof=   13.80 CofMax=   10.00 Det=-1.18D-06
 Inversion failed.  Reducing to  4 matrices.
 Large coefficients: NSaved=  4 BigCof=   25.48 CofMax=   10.00 Det=-1.23D-06
 Inversion failed.  Reducing to  3 matrices.
 Large coefficients: NSaved=  3 BigCof=   40.93 CofMax=   10.00 Det=-3.18D-06
 Inversion failed.  Reducing to  2 matrices.
 Coeff-Com:  0.697D+01-0.597D+01
 Coeff-En:   0.000D+00 0.100D+01
 Coeff:      0.666D+01-0.566D+01
 Gap=     0.054 Goal=   None    Shift=    0.000
 Gap=     0.282 Goal=   None    Shift=    0.000
 RMSDP=1.13D-02 MaxDP=1.33D+00 DE=-1.97D-03 OVMax= 4.54D-01

 Cycle  15  Pass 1  IDiag  1:
 RMSU=  5.53D-03    CP:  5.47D-01  4.56D-02  8.24D-01 -7.92D-02  1.03D+00
                    CP:  2.14D+00 -2.96D+00  3.00D+00  3.00D+00  3.00D+00
                    CP:  3.00D+00  3.00D+00  3.00D+00 -3.00D+00
 E= -732.223360190155     Delta-E=       -0.009278400098 Rises=F Damp=F
 DIIS: error= 5.78D-03 at cycle  15 NSaved=   3.
 NSaved= 3 IEnMin= 3 EnMin= -732.223360190155     IErMin= 3 ErrMin= 5.78D-03
 ErrMax= 5.78D-03  0.00D+00 EMaxC= 1.00D-01 BMatC= 3.99D-02 BMatP= 2.99D-02
 IDIUse=3 WtCom= 9.56D-01 WtEn= 4.39D-02
 Coeff-Com:  0.741D+01-0.688D+01 0.462D+00
 Coeff-En:   0.000D+00 0.000D+00 0.100D+01
 Coeff:      0.709D+01-0.657D+01 0.486D+00
 Gap=     0.185 Goal=   None    Shift=    0.000
 Gap=     0.257 Goal=   None    Shift=    0.000
 RMSDP=3.36D-03 MaxDP=4.62D-01 DE=-9.28D-03 OVMax= 1.66D-01

 Cycle  16  Pass 1  IDiag  1:
 RMSU=  1.57D-03    CP:  5.61D-01  4.60D-02  8.28D-01 -8.77D-02  9.14D-01
                    CP:  2.45D+00 -3.00D+00  3.00D+00  3.00D+00  3.00D+00
                    CP:  3.00D+00  3.00D+00  3.00D+00 -3.00D+00  1.14D+00
 E= -732.226150661821     Delta-E=       -0.002790471665 Rises=F Damp=F
 DIIS: error= 6.92D-03 at cycle  16 NSaved=   4.
 NSaved= 4 IEnMin= 4 EnMin= -732.226150661821     IErMin= 3 ErrMin= 5.78D-03
 ErrMax= 6.92D-03  0.00D+00 EMaxC= 1.00D-01 BMatC= 4.26D-02 BMatP= 2.99D-02
 IDIUse=3 WtCom= 9.56D-01 WtEn= 4.39D-02
 Coeff-Com:  0.770D+01-0.721D+01 0.362D+00 0.151D+00
 Coeff-En:   0.000D+00 0.000D+00 0.000D+00 0.100D+01
 Coeff:      0.736D+01-0.690D+01 0.346D+00 0.189D+00
 Gap=     0.203 Goal=   None    Shift=    0.000
 Gap=     0.256 Goal=   None    Shift=    0.000
 RMSDP=7.72D-04 MaxDP=7.50D-02 DE=-2.79D-03 OVMax= 4.96D-02

 Cycle  17  Pass 1  IDiag  1:
 RMSU=  2.71D-04    CP:  5.63D-01  4.58D-02  8.27D-01 -9.40D-02  9.00D-01
                    CP:  2.52D+00 -3.00D+00  3.00D+00  3.00D+00  3.00D+00
                    CP:  3.00D+00  3.00D+00  3.00D+00 -3.00D+00  1.21D+00
                    CP:  1.25D+00
 E= -732.225529573407     Delta-E=        0.000621088414 Rises=F Damp=F
 DIIS: error= 7.02D-03 at cycle  17 NSaved=   5.
 NSaved= 5 IEnMin= 4 EnMin= -732.226150661821     IErMin= 3 ErrMin= 5.78D-03
 ErrMax= 7.02D-03  0.00D+00 EMaxC= 1.00D-01 BMatC= 4.63D-02 BMatP= 2.99D-02
 IDIUse=3 WtCom= 9.56D-01 WtEn= 4.39D-02
 Rare condition: small coef for last iteration:  0.000D+00
 Coeff-Com:  0.719D+01-0.680D+01 0.428D+00 0.156D+01-0.138D+01
 Coeff-En:   0.000D+00 0.000D+00 0.000D+00 0.000D+00 0.100D+01
 Coeff:      0.719D+01-0.680D+01 0.428D+00 0.156D+01-0.138D+01
 Gap=     0.207 Goal=   None    Shift=    0.000
 Gap=     0.255 Goal=   None    Shift=    0.000
 RMSDP=8.50D-04 MaxDP=1.03D-01 DE= 6.21D-04 OVMax= 7.29D-02

 Cycle  18  Pass 1  IDiag  1:
 RMSU=  3.25D-04    CP:  5.61D-01  4.61D-02  8.30D-01 -8.90D-02  9.19D-01
                    CP:  2.46D+00 -3.00D+00  3.00D+00  3.00D+00  3.00D+00
                    CP:  3.00D+00  3.00D+00  3.00D+00 -3.00D+00  1.16D+00
                    CP:  1.02D+00 -4.92D-01
 E= -732.225249301498     Delta-E=        0.000280271908 Rises=F Damp=F
 DIIS: error= 7.04D-03 at cycle  18 NSaved=   6.
 NSaved= 6 IEnMin= 4 EnMin= -732.226150661821     IErMin= 3 ErrMin= 5.78D-03
 ErrMax= 7.04D-03  0.00D+00 EMaxC= 1.00D-01 BMatC= 4.86D-02 BMatP= 2.99D-02
 IDIUse=3 WtCom= 9.56D-01 WtEn= 4.39D-02
 Rare condition: small coef for last iteration:  0.000D+00
 Coeff-Com:  0.685D+01-0.649D+01 0.490D+00 0.149D+01-0.256D-01-0.132D+01
 Coeff-En:   0.000D+00 0.000D+00 0.000D+00 0.000D+00 0.000D+00 0.100D+01
 Coeff:      0.685D+01-0.649D+01 0.490D+00 0.149D+01-0.256D-01-0.132D+01
 Gap=     0.202 Goal=   None    Shift=    0.000
 Gap=     0.259 Goal=   None    Shift=    0.000
 RMSDP=1.69D-03 MaxDP=2.13D-01 DE= 2.80D-04 OVMax= 1.10D-01

 Cycle  19  Pass 1  IDiag  1:
 RMSU=  2.54D-04    CP:  5.65D-01  4.52D-02  8.24D-01 -1.05D-01  8.89D-01
                    CP:  2.61D+00 -3.00D+00  3.00D+00  3.00D+00  3.00D+00
                    CP:  3.00D+00  3.00D+00  3.00D+00 -3.00D+00  1.27D+00
                    CP:  1.41D+00  2.17D+00 -4.70D-01
 E= -732.226208708821     Delta-E=       -0.000959407322 Rises=F Damp=F
 DIIS: error= 6.81D-03 at cycle  19 NSaved=   7.
 NSaved= 7 IEnMin= 7 EnMin= -732.226208708821     IErMin= 3 ErrMin= 5.78D-03
 ErrMax= 6.81D-03  0.00D+00 EMaxC= 1.00D-01 BMatC= 4.62D-02 BMatP= 2.99D-02
 IDIUse=3 WtCom= 9.56D-01 WtEn= 4.39D-02
 Coeff-Com:  0.265D+01-0.269D+01 0.982D+00 0.674D+01-0.375D+01-0.795D+01
 Coeff-Com:  0.503D+01
 Coeff-En:   0.000D+00 0.000D+00 0.000D+00 0.000D+00 0.000D+00 0.000D+00
 Coeff-En:   0.100D+01
 Coeff:      0.253D+01-0.257D+01 0.939D+00 0.644D+01-0.359D+01-0.760D+01
 Coeff:      0.485D+01
 Gap=     0.182 Goal=   None    Shift=    0.000
 Gap=     0.286 Goal=   None    Shift=    0.000
 RMSDP=9.49D-03 MaxDP=1.45D+00 DE=-9.59D-04 OVMax= 1.96D-01

 Cycle  20  Pass 1  IDiag  1:
 RMSU=  4.83D-03    CP:  5.92D-01  3.87D-02  7.71D-01 -2.31D-01  8.83D-01
                    CP:  3.00D+00 -3.00D+00  3.00D+00  3.00D+00  3.00D+00
                    CP:  3.00D+00  3.00D+00 -3.00D+00 -3.00D+00  1.81D+00
                    CP:  2.52D+00  3.00D+00 -3.00D+00  3.00D+00
 E= -732.238807316770     Delta-E=       -0.012598607949 Rises=F Damp=F
 DIIS: error= 4.81D-03 at cycle  20 NSaved=   8.
 NSaved= 8 IEnMin= 8 EnMin= -732.238807316770     IErMin= 8 ErrMin= 4.81D-03
 ErrMax= 4.81D-03  0.00D+00 EMaxC= 1.00D-01 BMatC= 1.19D-02 BMatP= 2.99D-02
 IDIUse=3 WtCom= 9.56D-01 WtEn= 4.39D-02
 Coeff-Com:  0.333D+00-0.365D+00-0.783D-01 0.726D+00-0.435D+01 0.155D+01
 Coeff-Com:  0.142D+01 0.177D+01
 Coeff-En:   0.000D+00 0.000D+00 0.000D+00 0.000D+00 0.000D+00 0.000D+00
 Coeff-En:   0.000D+00 0.100D+01
 Coeff:      0.318D+00-0.349D+00-0.749D-01 0.694D+00-0.416D+01 0.148D+01
 Coeff:      0.135D+01 0.174D+01
 Gap=     0.141 Goal=   None    Shift=    0.000
 Gap=     0.276 Goal=   None    Shift=    0.000
 RMSDP=8.77D-03 MaxDP=1.21D+00 DE=-1.26D-02 OVMax= 1.36D-01

 Cycle  21  Pass 1  IDiag  1:
 Restarting incremental Fock formation.
 E= -732.242893942420     Delta-E=       -0.004086625651 Rises=F Damp=F
 DIIS: error= 7.69D-04 at cycle  21 NSaved=   9.
 NSaved= 9 IEnMin= 9 EnMin= -732.242893942420     IErMin= 9 ErrMin= 7.69D-04
 ErrMax= 7.69D-04  0.00D+00 EMaxC= 1.00D-01 BMatC= 1.47D-03 BMatP= 1.19D-02
 IDIUse=3 WtCom= 9.92D-01 WtEn= 7.69D-03
 Coeff-Com:  0.819D+00-0.625D+00-0.176D+00-0.216D+01 0.637D+00 0.180D+01
 Coeff-Com: -0.611D+00 0.579D+00 0.738D+00
 Coeff-En:   0.000D+00 0.000D+00 0.000D+00 0.000D+00 0.000D+00 0.000D+00
 Coeff-En:   0.000D+00 0.000D+00 0.100D+01
 Coeff:      0.813D+00-0.621D+00-0.175D+00-0.215D+01 0.632D+00 0.179D+01
 Coeff:     -0.607D+00 0.575D+00 0.740D+00
 Gap=     0.135 Goal=   None    Shift=    0.000
 Gap=     0.276 Goal=   None    Shift=    0.000
 RMSDP=2.98D-03 MaxDP=4.74D-01 DE=-4.09D-03 OVMax= 1.89D-02

 Cycle  22  Pass 1  IDiag  1:
 RMSU=  2.33D-03    CP:  9.83D-01
 E= -732.243141401981     Delta-E=       -0.000247459561 Rises=F Damp=F
 DIIS: error= 8.04D-04 at cycle  22 NSaved=  10.
 NSaved=10 IEnMin=10 EnMin= -732.243141401981     IErMin= 9 ErrMin= 7.69D-04
 ErrMax= 8.04D-04  0.00D+00 EMaxC= 1.00D-01 BMatC= 7.56D-04 BMatP= 1.47D-03
 IDIUse=3 WtCom= 9.92D-01 WtEn= 7.69D-03
 Coeff-Com:  0.188D+00-0.121D+00-0.510D-01-0.728D+00 0.111D+01-0.527D-02
 Coeff-Com: -0.318D+00-0.276D+00 0.398D+00 0.799D+00
 Coeff-En:   0.000D+00 0.000D+00 0.000D+00 0.000D+00 0.000D+00 0.000D+00
 Coeff-En:   0.000D+00 0.000D+00 0.000D+00 0.100D+01
 Coeff:      0.187D+00-0.120D+00-0.506D-01-0.723D+00 0.111D+01-0.523D-02
 Coeff:     -0.316D+00-0.274D+00 0.395D+00 0.801D+00
 Gap=     0.132 Goal=   None    Shift=    0.000
 Gap=     0.276 Goal=   None    Shift=    0.000
 RMSDP=5.68D-04 MaxDP=4.97D-02 DE=-2.47D-04 OVMax= 1.22D-02

 Cycle  23  Pass 1  IDiag  1:
 RMSU=  4.73D-04    CP:  9.86D-01  9.90D-01
 E= -732.243453248343     Delta-E=       -0.000311846362 Rises=F Damp=F
 DIIS: error= 7.36D-04 at cycle  23 NSaved=  11.
 NSaved=11 IEnMin=11 EnMin= -732.243453248343     IErMin=11 ErrMin= 7.36D-04
 ErrMax= 7.36D-04  0.00D+00 EMaxC= 1.00D-01 BMatC= 1.45D-04 BMatP= 7.56D-04
 IDIUse=3 WtCom= 9.93D-01 WtEn= 7.36D-03
 Coeff-Com:  0.213D-01-0.459D-02-0.252D-01-0.212D+00 0.402D+00-0.714D-02
 Coeff-Com: -0.102D+00-0.199D+00 0.126D+00 0.279D+00 0.723D+00
 Coeff-En:   0.000D+00 0.000D+00 0.000D+00 0.000D+00 0.000D+00 0.000D+00
 Coeff-En:   0.000D+00 0.000D+00 0.000D+00 0.000D+00 0.100D+01
 Coeff:      0.212D-01-0.455D-02-0.250D-01-0.211D+00 0.399D+00-0.709D-02
 Coeff:     -0.101D+00-0.198D+00 0.125D+00 0.277D+00 0.725D+00
 Gap=     0.133 Goal=   None    Shift=    0.000
 Gap=     0.276 Goal=   None    Shift=    0.000
 RMSDP=4.25D-04 MaxDP=8.42D-02 DE=-3.12D-04 OVMax= 1.29D-02

 Cycle  24  Pass 1  IDiag  1:
 RMSU=  3.85D-04    CP:  9.85D-01  1.01D+00  1.35D+00
 E= -732.243705983242     Delta-E=       -0.000252734899 Rises=F Damp=F
 DIIS: error= 7.22D-04 at cycle  24 NSaved=  12.
 NSaved=12 IEnMin=12 EnMin= -732.243705983242     IErMin=12 ErrMin= 7.22D-04
 ErrMax= 7.22D-04  0.00D+00 EMaxC= 1.00D-01 BMatC= 1.06D-04 BMatP= 1.45D-04
 IDIUse=3 WtCom= 9.93D-01 WtEn= 7.22D-03
 Coeff-Com:  0.497D-01-0.331D-01-0.320D-01-0.187D+00-0.265D-01 0.283D+00
 Coeff-Com: -0.537D-01-0.137D-02-0.530D-02-0.761D-01 0.146D+00 0.936D+00
 Coeff-En:   0.000D+00 0.000D+00 0.000D+00 0.000D+00 0.000D+00 0.000D+00
 Coeff-En:   0.000D+00 0.000D+00 0.000D+00 0.000D+00 0.000D+00 0.100D+01
 Coeff:      0.494D-01-0.329D-01-0.317D-01-0.186D+00-0.263D-01 0.281D+00
 Coeff:     -0.533D-01-0.136D-02-0.526D-02-0.756D-01 0.145D+00 0.937D+00
 Gap=     0.134 Goal=   None    Shift=    0.000
 Gap=     0.276 Goal=   None    Shift=    0.000
 RMSDP=5.27D-04 MaxDP=1.16D-01 DE=-2.53D-04 OVMax= 1.80D-02

 Cycle  25  Pass 1  IDiag  1:
 RMSU=  1.46D-04    CP:  9.83D-01  1.12D+00  1.54D+00  1.89D+00
 E= -732.244037457082     Delta-E=       -0.000331473840 Rises=F Damp=F
 DIIS: error= 7.22D-04 at cycle  25 NSaved=  13.
 NSaved=13 IEnMin=13 EnMin= -732.244037457082     IErMin=13 ErrMin= 7.22D-04
 ErrMax= 7.22D-04  0.00D+00 EMaxC= 1.00D-01 BMatC= 1.03D-04 BMatP= 1.06D-04
 IDIUse=3 WtCom= 9.93D-01 WtEn= 7.22D-03
 Coeff-Com:  0.734D-01-0.528D-01-0.383D-01-0.207D+00-0.900D-01 0.364D+00
 Coeff-Com: -0.712D-01 0.430D-01-0.741D-02-0.997D-01-0.958D-01 0.606D+00
 Coeff-Com:  0.576D+00
 Coeff-En:   0.000D+00 0.000D+00 0.000D+00 0.000D+00 0.000D+00 0.000D+00
 Coeff-En:   0.000D+00 0.000D+00 0.000D+00 0.000D+00 0.000D+00 0.000D+00
 Coeff-En:   0.100D+01
 Coeff:      0.729D-01-0.524D-01-0.380D-01-0.206D+00-0.894D-01 0.362D+00
 Coeff:     -0.707D-01 0.427D-01-0.736D-02-0.990D-01-0.951D-01 0.602D+00
 Coeff:      0.579D+00
 Gap=     0.135 Goal=   None    Shift=    0.000
 Gap=     0.276 Goal=   None    Shift=    0.000
 RMSDP=3.69D-04 MaxDP=8.06D-02 DE=-3.31D-04 OVMax= 1.35D-02

 Cycle  26  Pass 1  IDiag  1:
 RMSU=  4.63D-05    CP:  9.81D-01  1.19D+00  1.63D+00  2.51D+00  1.76D+00
 E= -732.244281039710     Delta-E=       -0.000243582628 Rises=F Damp=F
 DIIS: error= 7.23D-04 at cycle  26 NSaved=  14.
 NSaved=14 IEnMin=14 EnMin= -732.244281039710     IErMin=13 ErrMin= 7.22D-04
 ErrMax= 7.23D-04  0.00D+00 EMaxC= 1.00D-01 BMatC= 1.01D-04 BMatP= 1.03D-04
 IDIUse=3 WtCom= 9.93D-01 WtEn= 7.22D-03
 Coeff-Com:  0.913D-01-0.685D-01-0.408D-01-0.225D+00-0.410D-01 0.360D+00
 Coeff-Com: -0.957D-01 0.263D-01 0.151D-01-0.497D-01-0.896D-01 0.326D+00
 Coeff-Com:  0.624D-01 0.728D+00
 Coeff-En:   0.000D+00 0.000D+00 0.000D+00 0.000D+00 0.000D+00 0.000D+00
 Coeff-En:   0.000D+00 0.000D+00 0.000D+00 0.000D+00 0.000D+00 0.000D+00
 Coeff-En:   0.000D+00 0.100D+01
 Coeff:      0.906D-01-0.680D-01-0.405D-01-0.223D+00-0.407D-01 0.357D+00
 Coeff:     -0.950D-01 0.261D-01 0.150D-01-0.493D-01-0.889D-01 0.324D+00
 Coeff:      0.620D-01 0.730D+00
 Gap=     0.135 Goal=   None    Shift=    0.000
 Gap=     0.276 Goal=   None    Shift=    0.000
 RMSDP=3.21D-04 MaxDP=7.08D-02 DE=-2.44D-04 OVMax= 1.18D-02

 Cycle  27  Pass 1  IDiag  1:
 RMSU=  2.93D-05    CP:  9.80D-01  1.24D+00  1.68D+00  3.00D+00  2.42D+00
                    CP:  2.30D+00
 E= -732.244492481647     Delta-E=       -0.000211441937 Rises=F Damp=F
 DIIS: error= 7.25D-04 at cycle  27 NSaved=  15.
 NSaved=15 IEnMin=15 EnMin= -732.244492481647     IErMin=13 ErrMin= 7.22D-04
 ErrMax= 7.25D-04  0.00D+00 EMaxC= 1.00D-01 BMatC= 1.01D-04 BMatP= 1.01D-04
 IDIUse=3 WtCom= 9.93D-01 WtEn= 7.22D-03
 Coeff-Com:  0.446D-01-0.247D-01-0.327D-01-0.169D+00-0.174D-01 0.289D+00
 Coeff-Com: -0.992D-01-0.143D-01 0.247D-01-0.158D-01 0.982D-01 0.393D+00
 Coeff-Com: -0.791D+00-0.238D+01 0.370D+01
 Coeff-En:   0.000D+00 0.000D+00 0.000D+00 0.000D+00 0.000D+00 0.000D+00
 Coeff-En:   0.000D+00 0.000D+00 0.000D+00 0.000D+00 0.000D+00 0.000D+00
 Coeff-En:   0.000D+00 0.000D+00 0.100D+01
 Coeff:      0.443D-01-0.245D-01-0.325D-01-0.168D+00-0.172D-01 0.287D+00
 Coeff:     -0.985D-01-0.142D-01 0.245D-01-0.156D-01 0.974D-01 0.391D+00
 Coeff:     -0.785D+00-0.237D+01 0.368D+01
 Gap=     0.134 Goal=   None    Shift=    0.000
 Gap=     0.276 Goal=   None    Shift=    0.000
 RMSDP=1.25D-03 MaxDP=2.84D-01 DE=-2.11D-04 OVMax= 4.18D-02

 Cycle  28  Pass 1  IDiag  1:
 RMSU=  8.97D-04    CP:  9.74D-01  1.45D+00  1.81D+00  3.00D+00  3.00D+00
                    CP:  3.00D+00  3.00D+00
 E= -732.245254982661     Delta-E=       -0.000762501014 Rises=F Damp=F
 DIIS: error= 7.20D-04 at cycle  28 NSaved=  16.
 NSaved=16 IEnMin=16 EnMin= -732.245254982661     IErMin=16 ErrMin= 7.20D-04
 ErrMax= 7.20D-04  0.00D+00 EMaxC= 1.00D-01 BMatC= 9.76D-05 BMatP= 1.01D-04
 IDIUse=3 WtCom= 9.93D-01 WtEn= 7.20D-03
 Coeff-Com:  0.338D-01-0.251D-01-0.198D-01-0.132D+00-0.611D-01 0.274D+00
 Coeff-Com: -0.736D-01 0.118D-01-0.262D-01-0.112D+00 0.174D+00 0.973D+00
 Coeff-Com:  0.128D+00-0.583D+01 0.364D+01 0.205D+01
 Coeff-En:   0.000D+00 0.000D+00 0.000D+00 0.000D+00 0.000D+00 0.000D+00
 Coeff-En:   0.000D+00 0.000D+00 0.000D+00 0.000D+00 0.000D+00 0.000D+00
 Coeff-En:   0.000D+00 0.000D+00 0.000D+00 0.100D+01
 Coeff:      0.336D-01-0.249D-01-0.197D-01-0.131D+00-0.607D-01 0.272D+00
 Coeff:     -0.731D-01 0.117D-01-0.260D-01-0.111D+00 0.173D+00 0.966D+00
 Coeff:      0.127D+00-0.579D+01 0.362D+01 0.204D+01
 Gap=     0.134 Goal=   None    Shift=    0.000
 Gap=     0.277 Goal=   None    Shift=    0.000
 RMSDP=2.79D-03 MaxDP=6.34D-01 DE=-7.63D-04 OVMax= 7.98D-02

 Cycle  29  Pass 1  IDiag  1:
 RMSU=  3.73D-04    CP:  9.61D-01  1.97D+00  1.75D+00  3.00D+00  3.00D+00
                    CP:  3.00D+00  3.00D+00  3.00D+00
 E= -732.246717281567     Delta-E=       -0.001462298906 Rises=F Damp=F
 DIIS: error= 7.04D-04 at cycle  29 NSaved=  17.
 NSaved=17 IEnMin=17 EnMin= -732.246717281567     IErMin=17 ErrMin= 7.04D-04
 ErrMax= 7.04D-04  0.00D+00 EMaxC= 1.00D-01 BMatC= 8.72D-05 BMatP= 9.76D-05
 IDIUse=3 WtCom= 9.93D-01 WtEn= 7.04D-03
 Coeff-Com: -0.542D-01 0.539D-01-0.988D-04 0.281D-01-0.223D+00 0.175D+00
 Coeff-Com:  0.105D-01 0.689D-01-0.914D-01-0.190D+00-0.548D-01 0.100D+01
 Coeff-Com:  0.227D+01-0.975D+00-0.358D+01 0.794D+00 0.177D+01
 Coeff-En:   0.000D+00 0.000D+00 0.000D+00 0.000D+00 0.000D+00 0.000D+00
 Coeff-En:   0.000D+00 0.000D+00 0.000D+00 0.000D+00 0.000D+00 0.000D+00
 Coeff-En:   0.000D+00 0.000D+00 0.000D+00 0.000D+00 0.100D+01
 Coeff:     -0.538D-01 0.535D-01-0.981D-04 0.279D-01-0.221D+00 0.174D+00
 Coeff:      0.105D-01 0.684D-01-0.907D-01-0.189D+00-0.544D-01 0.995D+00
 Coeff:      0.225D+01-0.968D+00-0.356D+01 0.789D+00 0.176D+01
 Gap=     0.132 Goal=   None    Shift=    0.000
 Gap=     0.277 Goal=   None    Shift=    0.000
 RMSDP=3.35D-03 MaxDP=7.69D-01 DE=-1.46D-03 OVMax= 8.20D-02

 Cycle  30  Pass 1  IDiag  1:
 RMSU=  1.83D-03    CP:  9.44D-01  2.63D+00  1.27D+00  3.00D+00  3.00D+00
                    CP:  3.00D+00  3.00D+00  3.00D+00  3.00D+00
 E= -732.248024598908     Delta-E=       -0.001307317340 Rises=F Damp=F
 DIIS: error= 6.36D-04 at cycle  30 NSaved=  18.
 NSaved=18 IEnMin=18 EnMin= -732.248024598908     IErMin=18 ErrMin= 6.36D-04
 ErrMax= 6.36D-04  0.00D+00 EMaxC= 1.00D-01 BMatC= 7.46D-05 BMatP= 8.72D-05
 IDIUse=3 WtCom= 9.94D-01 WtEn= 6.36D-03
 Coeff-Com:  0.337D-01-0.353D-01-0.333D-01-0.463D-01-0.519D-01 0.234D+00
 Coeff-Com: -0.961D-01-0.428D-01 0.346D-01 0.706D-01-0.154D+00-0.753D+00
 Coeff-Com: -0.139D+01 0.553D+01 0.570D+00-0.476D+01-0.109D+01 0.298D+01
 Coeff-En:   0.000D+00 0.000D+00 0.000D+00 0.000D+00 0.000D+00 0.000D+00
 Coeff-En:   0.000D+00 0.000D+00 0.000D+00 0.000D+00 0.000D+00 0.000D+00
 Coeff-En:   0.000D+00 0.000D+00 0.000D+00 0.000D+00 0.000D+00 0.100D+01
 Coeff:      0.335D-01-0.351D-01-0.331D-01-0.460D-01-0.515D-01 0.233D+00
 Coeff:     -0.955D-01-0.425D-01 0.344D-01 0.702D-01-0.153D+00-0.748D+00
 Coeff:     -0.138D+01 0.549D+01 0.566D+00-0.473D+01-0.109D+01 0.297D+01
 Gap=     0.134 Goal=   None    Shift=    0.000
 Gap=     0.277 Goal=   None    Shift=    0.000
 RMSDP=5.18D-03 MaxDP=1.17D+00 DE=-1.31D-03 OVMax= 1.02D-01

 Cycle  31  Pass 1  IDiag  1:
 RMSU=  2.24D-03    CP:  9.19D-01  3.00D+00  2.54D-01  3.00D+00  3.00D+00
                    CP:  3.00D+00  3.00D+00  3.00D+00  3.00D+00  2.71D+00
 E= -732.249527576354     Delta-E=       -0.001502977446 Rises=F Damp=F
 DIIS: error= 4.46D-04 at cycle  31 NSaved=  19.
 NSaved=19 IEnMin=19 EnMin= -732.249527576354     IErMin=19 ErrMin= 4.46D-04
 ErrMax= 4.46D-04  0.00D+00 EMaxC= 1.00D-01 BMatC= 5.90D-05 BMatP= 7.46D-05
 IDIUse=3 WtCom= 9.96D-01 WtEn= 4.46D-03
 Coeff-Com: -0.528D-01 0.628D-01-0.989D-02-0.105D+00 0.118D+00 0.548D-01
 Coeff-Com: -0.564D-01-0.918D-01 0.970D-01 0.225D+00 0.138D+00-0.956D+00
 Coeff-Com: -0.347D+01 0.699D+00 0.766D+01-0.492D+01-0.277D+01 0.303D+01
 Coeff-Com:  0.135D+01
 Coeff-En:   0.000D+00 0.000D+00 0.000D+00 0.000D+00 0.000D+00 0.000D+00
 Coeff-En:   0.000D+00 0.000D+00 0.000D+00 0.000D+00 0.000D+00 0.000D+00
 Coeff-En:   0.000D+00 0.000D+00 0.000D+00 0.000D+00 0.000D+00 0.000D+00
 Coeff-En:   0.100D+01
 Coeff:     -0.526D-01 0.625D-01-0.985D-02-0.105D+00 0.118D+00 0.546D-01
 Coeff:     -0.562D-01-0.914D-01 0.966D-01 0.224D+00 0.138D+00-0.951D+00
 Coeff:     -0.346D+01 0.695D+00 0.762D+01-0.490D+01-0.276D+01 0.301D+01
 Coeff:      0.135D+01
 Gap=     0.132 Goal=   None    Shift=    0.000
 Gap=     0.279 Goal=   None    Shift=    0.000
 RMSDP=6.90D-03 MaxDP=1.24D+00 DE=-1.50D-03 OVMax= 2.00D-01

 Cycle  32  Pass 1  IDiag  1:
 RMSU=  2.96D-03    CP:  8.88D-01  3.00D+00 -2.55D+00  3.00D+00  3.00D+00
                    CP:  3.00D+00  3.00D+00  3.00D+00  3.00D+00  3.00D+00
                    CP:  3.00D+00
 E= -732.250856777008     Delta-E=       -0.001329200654 Rises=F Damp=F
 DIIS: error= 1.10D-03 at cycle  32 NSaved=  20.
 NSaved=20 IEnMin=20 EnMin= -732.250856777008     IErMin=19 ErrMin= 4.46D-04
 ErrMax= 1.10D-03  0.00D+00 EMaxC= 1.00D-01 BMatC= 4.07D-04 BMatP= 5.90D-05
 IDIUse=3 WtCom= 9.96D-01 WtEn= 4.46D-03
 Coeff-Com: -0.453D-02 0.126D-01-0.145D-02-0.491D-01 0.169D+00-0.589D-01
 Coeff-Com: -0.355D-01-0.127D+00 0.112D+00 0.240D+00 0.206D+00-0.999D+00
 Coeff-Com: -0.370D+01-0.181D+01 0.914D+01-0.290D+01-0.302D+01 0.224D+01
 Coeff-Com:  0.142D+01 0.153D+00
 Coeff-En:   0.000D+00 0.000D+00 0.000D+00 0.000D+00 0.000D+00 0.000D+00
 Coeff-En:   0.000D+00 0.000D+00 0.000D+00 0.000D+00 0.000D+00 0.000D+00
 Coeff-En:   0.000D+00 0.000D+00 0.000D+00 0.000D+00 0.000D+00 0.000D+00
 Coeff-En:   0.000D+00 0.100D+01
 Coeff:     -0.451D-02 0.125D-01-0.145D-02-0.488D-01 0.168D+00-0.586D-01
 Coeff:     -0.353D-01-0.127D+00 0.112D+00 0.239D+00 0.205D+00-0.995D+00
 Coeff:     -0.368D+01-0.180D+01 0.910D+01-0.288D+01-0.300D+01 0.223D+01
 Coeff:      0.141D+01 0.156D+00
 Gap=     0.136 Goal=   None    Shift=    0.000
 Gap=     0.278 Goal=   None    Shift=    0.000
 RMSDP=2.66D-04 MaxDP=3.05D-02 DE=-1.33D-03 OVMax= 1.06D-02

 Cycle  33  Pass 1  IDiag  1:
 RMSU=  2.44D-04    CP:  8.87D-01  3.00D+00 -2.63D+00  3.00D+00  3.00D+00
                    CP:  3.00D+00  3.00D+00  3.00D+00  3.00D+00  3.00D+00
                    CP:  3.00D+00  1.02D+00
 E= -732.250869781150     Delta-E=       -0.000013004141 Rises=F Damp=F
 DIIS: error= 1.18D-03 at cycle  33 NSaved=  20.
 NSaved=20 IEnMin=20 EnMin= -732.250869781150     IErMin=18 ErrMin= 4.46D-04
 ErrMax= 1.18D-03  0.00D+00 EMaxC= 1.00D-01 BMatC= 4.38D-04 BMatP= 5.90D-05
 IDIUse=3 WtCom= 9.96D-01 WtEn= 4.46D-03
 Coeff-Com:  0.158D-01 0.137D-01-0.513D-01 0.193D+00-0.119D+00-0.312D-01
 Coeff-Com: -0.102D+00 0.108D+00 0.241D+00 0.143D+00-0.936D+00-0.290D+01
 Coeff-Com: -0.113D+00 0.629D+01-0.281D+01-0.272D+01 0.224D+01 0.144D+01
 Coeff-Com: -0.110D+01 0.120D+01
 Coeff-En:   0.000D+00 0.000D+00 0.000D+00 0.000D+00 0.000D+00 0.000D+00
 Coeff-En:   0.000D+00 0.000D+00 0.000D+00 0.000D+00 0.000D+00 0.000D+00
 Coeff-En:   0.000D+00 0.000D+00 0.000D+00 0.000D+00 0.000D+00 0.000D+00
 Coeff-En:   0.000D+00 0.100D+01
 Coeff:      0.157D-01 0.136D-01-0.510D-01 0.192D+00-0.119D+00-0.310D-01
 Coeff:     -0.102D+00 0.107D+00 0.240D+00 0.143D+00-0.932D+00-0.289D+01
 Coeff:     -0.112D+00 0.626D+01-0.279D+01-0.271D+01 0.223D+01 0.143D+01
 Coeff:     -0.110D+01 0.120D+01
 Gap=     0.134 Goal=   None    Shift=    0.000
 Gap=     0.279 Goal=   None    Shift=    0.000
 RMSDP=1.42D-04 MaxDP=1.53D-02 DE=-1.30D-05 OVMax= 9.96D-04

 Cycle  34  Pass 1  IDiag  1:
 RMSU=  9.15D-05    CP:  8.86D-01  3.00D+00 -2.67D+00  3.00D+00  3.00D+00
                    CP:  3.00D+00  3.00D+00  3.00D+00  3.00D+00  3.00D+00
                    CP:  3.00D+00  1.02D+00  1.29D+00
 E= -732.250893878058     Delta-E=       -0.000024096909 Rises=F Damp=F
 DIIS: error= 1.13D-03 at cycle  34 NSaved=  20.
 NSaved=20 IEnMin=20 EnMin= -732.250893878058     IErMin=17 ErrMin= 4.46D-04
 ErrMax= 1.13D-03  0.00D+00 EMaxC= 1.00D-01 BMatC= 3.98D-04 BMatP= 5.90D-05
 IDIUse=3 WtCom= 9.96D-01 WtEn= 4.46D-03
 Coeff-Com:  0.485D-02-0.553D-01 0.127D+00-0.394D-01-0.404D-01-0.583D-01
 Coeff-Com:  0.630D-01 0.148D+00 0.808D-01-0.662D+00-0.172D+01 0.171D+01
 Coeff-Com:  0.244D+01-0.254D+01-0.206D+01 0.212D+01 0.136D+01-0.234D+01
 Coeff-Com:  0.927D+00 0.153D+01
 Coeff-En:   0.000D+00 0.000D+00 0.000D+00 0.000D+00 0.000D+00 0.000D+00
 Coeff-En:   0.000D+00 0.000D+00 0.000D+00 0.000D+00 0.000D+00 0.000D+00
 Coeff-En:   0.000D+00 0.000D+00 0.000D+00 0.000D+00 0.000D+00 0.000D+00
 Coeff-En:   0.000D+00 0.100D+01
 Coeff:      0.483D-02-0.551D-01 0.127D+00-0.392D-01-0.402D-01-0.580D-01
 Coeff:      0.627D-01 0.148D+00 0.804D-01-0.659D+00-0.172D+01 0.171D+01
 Coeff:      0.243D+01-0.253D+01-0.205D+01 0.211D+01 0.136D+01-0.233D+01
 Coeff:      0.923D+00 0.153D+01
 Gap=     0.136 Goal=   None    Shift=    0.000
 Gap=     0.279 Goal=   None    Shift=    0.000
 RMSDP=3.92D-04 MaxDP=5.75D-02 DE=-2.41D-05 OVMax= 1.76D-02

 Cycle  35  Pass 1  IDiag  1:
 RMSU=  1.54D-04    CP:  8.86D-01  3.00D+00 -2.69D+00  3.00D+00  3.00D+00
                    CP:  3.00D+00  3.00D+00  3.00D+00  3.00D+00  3.00D+00
                    CP:  3.00D+00  1.10D+00  2.36D+00  1.50D+00
 E= -732.250922927204     Delta-E=       -0.000029049146 Rises=F Damp=F
 DIIS: error= 1.10D-03 at cycle  35 NSaved=  20.
 NSaved=20 IEnMin=20 EnMin= -732.250922927204     IErMin=16 ErrMin= 4.46D-04
 ErrMax= 1.10D-03  0.00D+00 EMaxC= 1.00D-01 BMatC= 3.85D-04 BMatP= 5.90D-05
 IDIUse=3 WtCom= 9.96D-01 WtEn= 4.46D-03
 Coeff-Com: -0.316D-01 0.704D-01-0.440D-02-0.399D-01-0.509D-01 0.570D-01
 Coeff-Com:  0.154D+00-0.906D-02-0.807D+00-0.167D+01 0.400D+01 0.988D+00
 Coeff-Com: -0.358D+01-0.151D+01 0.215D+01 0.112D+01-0.210D+01-0.583D+00
 Coeff-Com:  0.173D+01 0.112D+01
 Coeff-En:   0.000D+00 0.000D+00 0.000D+00 0.000D+00 0.000D+00 0.000D+00
 Coeff-En:   0.000D+00 0.000D+00 0.000D+00 0.000D+00 0.000D+00 0.000D+00
 Coeff-En:   0.000D+00 0.000D+00 0.000D+00 0.000D+00 0.000D+00 0.000D+00
 Coeff-En:   0.000D+00 0.100D+01
 Coeff:     -0.314D-01 0.701D-01-0.438D-02-0.397D-01-0.507D-01 0.567D-01
 Coeff:      0.153D+00-0.902D-02-0.803D+00-0.167D+01 0.398D+01 0.984D+00
 Coeff:     -0.356D+01-0.151D+01 0.214D+01 0.111D+01-0.209D+01-0.580D+00
 Coeff:      0.173D+01 0.112D+01
 Gap=     0.135 Goal=   None    Shift=    0.000
 Gap=     0.279 Goal=   None    Shift=    0.000
 RMSDP=2.30D-04 MaxDP=3.18D-02 DE=-2.90D-05 OVMax= 8.43D-03

 Cycle  36  Pass 1  IDiag  1:
 RMSU=  8.71D-05    CP:  8.85D-01  3.00D+00 -2.56D+00  3.00D+00  3.00D+00
                    CP:  3.00D+00  3.00D+00  3.00D+00  3.00D+00  3.00D+00
                    CP:  3.00D+00  1.11D+00  2.73D+00  3.00D+00  1.53D+00
 E= -732.250991869486     Delta-E=       -0.000068942282 Rises=F Damp=F
 DIIS: error= 8.58D-04 at cycle  36 NSaved=  20.
 NSaved=20 IEnMin=20 EnMin= -732.250991869486     IErMin=15 ErrMin= 4.46D-04
 ErrMax= 8.58D-04  0.00D+00 EMaxC= 1.00D-01 BMatC= 2.31D-04 BMatP= 5.90D-05
 IDIUse=3 WtCom= 9.96D-01 WtEn= 4.46D-03
 Coeff-Com:  0.217D-01-0.303D-02-0.165D-02-0.502D-01 0.282D-01 0.101D+00
 Coeff-Com:  0.446D-01-0.629D+00-0.136D+01 0.179D+01 0.173D+01-0.176D+01
 Coeff-Com: -0.464D+00 0.392D+00 0.273D+00 0.227D+00-0.157D+01 0.146D-01
 Coeff-Com: -0.118D+01 0.340D+01
 Coeff-En:   0.000D+00 0.000D+00 0.000D+00 0.000D+00 0.000D+00 0.000D+00
 Coeff-En:   0.000D+00 0.000D+00 0.000D+00 0.000D+00 0.000D+00 0.000D+00
 Coeff-En:   0.000D+00 0.000D+00 0.000D+00 0.000D+00 0.000D+00 0.000D+00
 Coeff-En:   0.000D+00 0.100D+01
 Coeff:      0.216D-01-0.302D-02-0.164D-02-0.500D-01 0.281D-01 0.100D+00
 Coeff:      0.444D-01-0.626D+00-0.135D+01 0.178D+01 0.172D+01-0.175D+01
 Coeff:     -0.461D+00 0.390D+00 0.272D+00 0.226D+00-0.157D+01 0.145D-01
 Coeff:     -0.118D+01 0.339D+01
 Gap=     0.133 Goal=   None    Shift=    0.000
 Gap=     0.279 Goal=   None    Shift=    0.000
 RMSDP=1.35D-03 MaxDP=1.95D-01 DE=-6.89D-05 OVMax= 3.14D-02

 Cycle  37  Pass 1  IDiag  1:
 RMSU=  1.07D-03    CP:  8.80D-01  3.00D+00 -2.30D+00  3.00D+00  3.00D+00
                    CP:  3.00D+00  3.00D+00  3.00D+00  3.00D+00  3.00D+00
                    CP:  3.00D+00  1.20D+00  3.00D+00  3.00D+00  3.00D+00
                    CP:  3.00D+00
 E= -732.251148364512     Delta-E=       -0.000156495025 Rises=F Damp=F
 DIIS: error= 1.33D-04 at cycle  37 NSaved=  20.
 NSaved=20 IEnMin=20 EnMin= -732.251148364512     IErMin=20 ErrMin= 1.33D-04
 ErrMax= 1.33D-04  0.00D+00 EMaxC= 1.00D-01 BMatC= 9.49D-06 BMatP= 5.90D-05
 IDIUse=3 WtCom= 9.99D-01 WtEn= 1.33D-03
 Coeff-Com:  0.152D-02 0.768D-02-0.996D-02 0.693D-02 0.542D-02-0.570D-02
 Coeff-Com: -0.207D+00-0.351D-01 0.810D+00-0.313D+00 0.513D+00 0.472D+00
 Coeff-Com: -0.116D+01-0.618D+00 0.144D+01-0.154D+00-0.113D+01-0.144D+01
 Coeff-Com:  0.142D+01 0.140D+01
 Coeff-En:   0.000D+00 0.000D+00 0.000D+00 0.000D+00 0.000D+00 0.000D+00
 Coeff-En:   0.000D+00 0.000D+00 0.000D+00 0.000D+00 0.000D+00 0.000D+00
 Coeff-En:   0.000D+00 0.000D+00 0.000D+00 0.000D+00 0.000D+00 0.000D+00
 Coeff-En:   0.000D+00 0.100D+01
 Coeff:      0.152D-02 0.767D-02-0.994D-02 0.692D-02 0.542D-02-0.570D-02
 Coeff:     -0.207D+00-0.350D-01 0.809D+00-0.312D+00 0.513D+00 0.471D+00
 Coeff:     -0.116D+01-0.617D+00 0.143D+01-0.154D+00-0.112D+01-0.144D+01
 Coeff:      0.142D+01 0.139D+01
 Gap=     0.129 Goal=   None    Shift=    0.000
 Gap=     0.280 Goal=   None    Shift=    0.000
 RMSDP=2.08D-03 MaxDP=2.89D-01 DE=-1.56D-04 OVMax= 2.98D-02

 Cycle  38  Pass 1  IDiag  1:
 RMSU=  4.83D-04    CP:  8.72D-01  3.00D+00 -1.92D+00  3.00D+00  3.00D+00
                    CP:  3.00D+00  3.00D+00  3.00D+00  3.00D+00  3.00D+00
                    CP:  3.00D+00  1.29D+00  3.00D+00  3.00D+00  3.00D+00
                    CP:  3.00D+00  2.67D+00
 E= -732.251073424647     Delta-E=        0.000074939865 Rises=F Damp=F
 DIIS: error= 1.06D-03 at cycle  38 NSaved=  20.
 NSaved=20 IEnMin=19 EnMin= -732.251148364512     IErMin=19 ErrMin= 1.33D-04
 ErrMax= 1.06D-03  0.00D+00 EMaxC= 1.00D-01 BMatC= 3.46D-04 BMatP= 9.49D-06
 IDIUse=3 WtCom= 9.99D-01 WtEn= 1.33D-03
 Rare condition: small coef for last iteration:  0.000D+00
 Coeff-Com:  0.618D-02-0.110D-01 0.520D-02 0.254D-02 0.222D-02-0.706D-01
 Coeff-Com:  0.505D-01 0.459D+00-0.300D+00 0.675D+00 0.405D+00-0.118D+01
 Coeff-Com: -0.543D+00 0.914D+00 0.878D-01-0.767D+00-0.468D+00 0.484D+00
 Coeff-Com:  0.945D+00 0.300D+00
 Coeff-En:   0.000D+00 0.000D+00 0.000D+00 0.000D+00 0.000D+00 0.000D+00
 Coeff-En:   0.000D+00 0.000D+00 0.000D+00 0.000D+00 0.000D+00 0.000D+00
 Coeff-En:   0.000D+00 0.000D+00 0.000D+00 0.000D+00 0.000D+00 0.000D+00
 Coeff-En:   0.000D+00 0.100D+01
 Coeff:      0.618D-02-0.110D-01 0.520D-02 0.254D-02 0.222D-02-0.706D-01
 Coeff:      0.505D-01 0.459D+00-0.300D+00 0.675D+00 0.405D+00-0.118D+01
 Coeff:     -0.543D+00 0.914D+00 0.878D-01-0.767D+00-0.468D+00 0.484D+00
 Coeff:      0.945D+00 0.300D+00
 Gap=     0.117 Goal=   None    Shift=    0.000
 Gap=     0.280 Goal=   None    Shift=    0.000
 RMSDP=2.79D-04 MaxDP=3.37D-02 DE= 7.49D-05 OVMax= 1.36D-02

 Cycle  39  Pass 1  IDiag  1:
 RMSU=  1.35D-04    CP:  8.71D-01  3.00D+00 -2.03D+00  3.00D+00  3.00D+00
                    CP:  3.00D+00  3.00D+00  3.00D+00  3.00D+00  3.00D+00
                    CP:  3.00D+00  1.30D+00  3.00D+00  3.00D+00  3.00D+00
                    CP:  3.00D+00  2.85D+00  1.13D+00
 E= -732.251084694076     Delta-E=       -0.000011269429 Rises=F Damp=F
 DIIS: error= 1.08D-03 at cycle  39 NSaved=  20.
 NSaved=20 IEnMin=18 EnMin= -732.251148364512     IErMin=18 ErrMin= 1.33D-04
 ErrMax= 1.08D-03  0.00D+00 EMaxC= 1.00D-01 BMatC= 3.56D-04 BMatP= 9.49D-06
 IDIUse=3 WtCom= 9.99D-01 WtEn= 1.33D-03
 Coeff-Com: -0.218D-02 0.696D-02 0.252D-02-0.309D-01-0.104D+00 0.125D+00
 Coeff-Com:  0.875D+00-0.735D+00 0.611D+00 0.460D+00-0.115D+01-0.544D+00
 Coeff-Com:  0.740D+00 0.254D+00-0.675D+00-0.332D+00 0.203D+00 0.979D+00
 Coeff-Com:  0.578D+00-0.259D+00
 Coeff-En:   0.000D+00 0.000D+00 0.000D+00 0.000D+00 0.000D+00 0.000D+00
 Coeff-En:   0.000D+00 0.000D+00 0.000D+00 0.000D+00 0.000D+00 0.000D+00
 Coeff-En:   0.000D+00 0.000D+00 0.000D+00 0.000D+00 0.000D+00 0.000D+00
 Coeff-En:   0.000D+00 0.100D+01
 Coeff:     -0.218D-02 0.695D-02 0.252D-02-0.309D-01-0.104D+00 0.125D+00
 Coeff:      0.874D+00-0.734D+00 0.611D+00 0.459D+00-0.115D+01-0.543D+00
 Coeff:      0.739D+00 0.254D+00-0.674D+00-0.331D+00 0.203D+00 0.978D+00
 Coeff:      0.578D+00-0.258D+00
 Gap=     0.118 Goal=   None    Shift=    0.000
 Gap=     0.280 Goal=   None    Shift=    0.000
 RMSDP=3.55D-05 MaxDP=4.44D-03 DE=-1.13D-05 OVMax= 2.83D-03

 Cycle  40  Pass 1  IDiag  1:
 RMSU=  1.51D-05    CP:  8.71D-01  3.00D+00 -2.03D+00  3.00D+00  3.00D+00
                    CP:  3.00D+00  3.00D+00  3.00D+00  3.00D+00  3.00D+00
                    CP:  3.00D+00  1.30D+00  3.00D+00  3.00D+00  3.00D+00
                    CP:  3.00D+00  2.83D+00  1.10D+00  8.65D-01
 E= -732.251087902202     Delta-E=       -0.000003208126 Rises=F Damp=F
 DIIS: error= 1.07D-03 at cycle  40 NSaved=  20.
 NSaved=20 IEnMin=17 EnMin= -732.251148364512     IErMin=17 ErrMin= 1.33D-04
 ErrMax= 1.07D-03  0.00D+00 EMaxC= 1.00D-01 BMatC= 3.44D-04 BMatP= 9.49D-06
 IDIUse=3 WtCom= 9.99D-01 WtEn= 1.33D-03
 Coeff-Com:  0.477D-02-0.258D-02-0.356D-01-0.836D-01 0.192D+00 0.872D+00
 Coeff-Com: -0.846D+00 0.646D+00 0.488D+00-0.118D+01-0.554D+00 0.768D+00
 Coeff-Com:  0.258D+00-0.700D+00-0.354D+00 0.218D+00 0.988D+00 0.573D+00
 Coeff-Com: -0.430D+00 0.176D+00
 Coeff-En:   0.000D+00 0.000D+00 0.000D+00 0.000D+00 0.000D+00 0.000D+00
 Coeff-En:   0.000D+00 0.000D+00 0.000D+00 0.000D+00 0.000D+00 0.000D+00
 Coeff-En:   0.000D+00 0.000D+00 0.000D+00 0.000D+00 0.000D+00 0.000D+00
 Coeff-En:   0.000D+00 0.100D+01
 Coeff:      0.476D-02-0.258D-02-0.356D-01-0.834D-01 0.191D+00 0.871D+00
 Coeff:     -0.845D+00 0.646D+00 0.487D+00-0.118D+01-0.554D+00 0.767D+00
 Coeff:      0.257D+00-0.699D+00-0.354D+00 0.217D+00 0.987D+00 0.572D+00
 Coeff:     -0.429D+00 0.177D+00
 Gap=     0.117 Goal=   None    Shift=    0.000
 Gap=     0.280 Goal=   None    Shift=    0.000
 RMSDP=2.59D-05 MaxDP=2.96D-03 DE=-3.21D-06 OVMax= 5.46D-04

 Cycle  41  Pass 1  IDiag  1:
 Restarting incremental Fock formation.
 E= -732.251082906028     Delta-E=        0.000004996174 Rises=F Damp=F
 DIIS: error= 1.09D-03 at cycle  41 NSaved=  20.
 NSaved=20 IEnMin=16 EnMin= -732.251148364512     IErMin=16 ErrMin= 1.33D-04
 ErrMax= 1.09D-03  0.00D+00 EMaxC= 1.00D-01 BMatC= 3.55D-04 BMatP= 9.49D-06
 IDIUse=3 WtCom= 9.99D-01 WtEn= 1.33D-03
 Large coefficients: NSaved= 20 BigCof=   15.80 CofMax=   10.00 Det=-7.67D-10
 Inversion failed.  Reducing to 19 matrices.
 Large coefficients: NSaved= 19 BigCof=   16.10 CofMax=   10.00 Det=-7.74D-10
 Inversion failed.  Reducing to 18 matrices.
 Large coefficients: NSaved= 18 BigCof=   16.43 CofMax=   10.00 Det=-7.76D-10
 Inversion failed.  Reducing to 17 matrices.
 Large coefficients: NSaved= 17 BigCof=   15.86 CofMax=   10.00 Det=-7.82D-10
 Inversion failed.  Reducing to 16 matrices.
 Large coefficients: NSaved= 16 BigCof=   13.28 CofMax=   10.00 Det=-8.28D-10
 Inversion failed.  Reducing to 15 matrices.
 Large coefficients: NSaved= 15 BigCof=   11.89 CofMax=   10.00 Det=-8.70D-10
 Inversion failed.  Reducing to 14 matrices.
 Large coefficients: NSaved= 14 BigCof=   10.68 CofMax=   10.00 Det=-9.60D-10
 Inversion failed.  Reducing to 13 matrices.
 Large coefficients: NSaved= 13 BigCof=   23.78 CofMax=   10.00 Det=-1.13D-09
 Inversion failed.  Reducing to 12 matrices.
 Large coefficients: NSaved= 12 BigCof=   19.76 CofMax=   10.00 Det=-1.16D-09
 Inversion failed.  Reducing to 11 matrices.
 Large coefficients: NSaved= 11 BigCof=   22.97 CofMax=   10.00 Det=-1.24D-09
 Inversion failed.  Reducing to 10 matrices.
 Large coefficients: NSaved= 10 BigCof=   22.81 CofMax=   10.00 Det=-1.24D-09
 Inversion failed.  Reducing to  9 matrices.
 Large coefficients: NSaved=  9 BigCof=   23.93 CofMax=   10.00 Det=-1.25D-09
 Inversion failed.  Reducing to  8 matrices.
 Large coefficients: NSaved=  8 BigCof=   23.17 CofMax=   10.00 Det=-1.27D-09
 Inversion failed.  Reducing to  7 matrices.
 Large coefficients: NSaved=  7 BigCof=   22.17 CofMax=   10.00 Det=-1.44D-09
 Inversion failed.  Reducing to  6 matrices.
 Large coefficients: NSaved=  6 BigCof=   21.34 CofMax=   10.00 Det=-1.45D-09
 Inversion failed.  Reducing to  5 matrices.
 Large coefficients: NSaved=  5 BigCof=   21.61 CofMax=   10.00 Det=-1.45D-09
 Inversion failed.  Reducing to  4 matrices.
 Large coefficients: NSaved=  4 BigCof=   21.73 CofMax=   10.00 Det=-1.46D-09
 Inversion failed.  Reducing to  3 matrices.
 Large coefficients: NSaved=  3 BigCof=   20.77 CofMax=   10.00 Det=-1.48D-09
 Inversion failed.  Reducing to  2 matrices.
 Large coefficients: NSaved=  2 BigCof=   67.14 CofMax=   10.00 Det=-7.68D-08
 Coeff-Com:  0.671D+02-0.661D+02
 Coeff-En:   0.000D+00 0.100D+01
 Coeff:      0.671D+02-0.661D+02
 Gap=     0.161 Goal=   None    Shift=    0.000
 Gap=     0.279 Goal=   None    Shift=    0.000
 RMSDP=1.57D-03 MaxDP=1.89D-01 DE= 5.00D-06 OVMax= 3.42D-02

 Cycle  42  Pass 1  IDiag  1:
 RMSU=  1.53D-03    CP:  1.00D+00
 E= -732.251225089001     Delta-E=       -0.000142182973 Rises=F Damp=F
 DIIS: error= 8.96D-05 at cycle  42 NSaved=   3.
 NSaved= 3 IEnMin= 3 EnMin= -732.251225089001     IErMin= 3 ErrMin= 8.96D-05
 ErrMax= 8.96D-05  0.00D+00 EMaxC= 1.00D-01 BMatC= 1.02D-05 BMatP= 3.44D-04
 IDIUse=1 WtCom= 1.00D+00 WtEn= 0.00D+00
 Large coefficients: NSaved=  3 BigCof=   36.19 CofMax=   10.00 Det=-5.16D-09
 Inversion failed.  Reducing to  2 matrices.
 Coeff-Com:  0.337D-01 0.966D+00
 Coeff:      0.337D-01 0.966D+00
 Gap=     0.133 Goal=   None    Shift=    0.000
 Gap=     0.279 Goal=   None    Shift=    0.000
 RMSDP=1.05D-04 MaxDP=9.50D-03 DE=-1.42D-04 OVMax= 3.93D-03

 Cycle  43  Pass 1  IDiag  1:
 RMSU=  6.86D-05    CP:  1.00D+00  9.48D-01
 E= -732.251232273990     Delta-E=       -0.000007184989 Rises=F Damp=F
 DIIS: error= 8.78D-05 at cycle  43 NSaved=   3.
 NSaved= 3 IEnMin= 3 EnMin= -732.251232273990     IErMin= 3 ErrMin= 8.78D-05
 ErrMax= 8.78D-05  0.00D+00 EMaxC= 1.00D-01 BMatC= 1.75D-05 BMatP= 1.02D-05
 IDIUse=1 WtCom= 1.00D+00 WtEn= 0.00D+00
 Coeff-Com: -0.158D-02 0.583D+00 0.419D+00
 Coeff:     -0.158D-02 0.583D+00 0.419D+00
 Gap=     0.133 Goal=   None    Shift=    0.000
 Gap=     0.279 Goal=   None    Shift=    0.000
 RMSDP=3.18D-05 MaxDP=4.05D-03 DE=-7.18D-06 OVMax= 1.19D-03

 Cycle  44  Pass 1  IDiag  1:
 RMSU=  2.54D-05    CP:  1.00D+00  9.51D-01  7.78D-01
 E= -732.251236773576     Delta-E=       -0.000004499586 Rises=F Damp=F
 DIIS: error= 8.49D-05 at cycle  44 NSaved=   4.
 NSaved= 4 IEnMin= 4 EnMin= -732.251236773576     IErMin= 4 ErrMin= 8.49D-05
 ErrMax= 8.49D-05  0.00D+00 EMaxC= 1.00D-01 BMatC= 2.43D-06 BMatP= 1.02D-05
 IDIUse=1 WtCom= 1.00D+00 WtEn= 0.00D+00
 Coeff-Com: -0.879D-02 0.143D+00 0.103D+00 0.763D+00
 Coeff:     -0.879D-02 0.143D+00 0.103D+00 0.763D+00
 Gap=     0.133 Goal=   None    Shift=    0.000
 Gap=     0.279 Goal=   None    Shift=    0.000
 RMSDP=3.58D-05 MaxDP=3.09D-03 DE=-4.50D-06 OVMax= 1.85D-03

 Cycle  45  Pass 1  IDiag  1:
 RMSU=  1.19D-05    CP:  1.00D+00  9.38D-01  9.85D-01  1.89D+00
 E= -732.251241181916     Delta-E=       -0.000004408339 Rises=F Damp=F
 DIIS: error= 8.33D-05 at cycle  45 NSaved=   5.
 NSaved= 5 IEnMin= 5 EnMin= -732.251241181916     IErMin= 5 ErrMin= 8.33D-05
 ErrMax= 8.33D-05  0.00D+00 EMaxC= 1.00D-01 BMatC= 2.24D-06 BMatP= 2.43D-06
 IDIUse=1 WtCom= 1.00D+00 WtEn= 0.00D+00
 Coeff-Com: -0.156D-01-0.106D+01-0.807D+00 0.981D-01 0.279D+01
 Coeff:     -0.156D-01-0.106D+01-0.807D+00 0.981D-01 0.279D+01
 Gap=     0.133 Goal=   None    Shift=    0.000
 Gap=     0.279 Goal=   None    Shift=    0.000
 RMSDP=1.92D-04 MaxDP=1.75D-02 DE=-4.41D-06 OVMax= 1.03D-02

 Cycle  46  Pass 1  IDiag  1:
 RMSU=  9.62D-05    CP:  1.00D+00  8.66D-01  2.21D+00  3.00D+00  3.00D+00
 E= -732.251263508777     Delta-E=       -0.000022326861 Rises=F Damp=F
 DIIS: error= 7.24D-05 at cycle  46 NSaved=   6.
 NSaved= 6 IEnMin= 6 EnMin= -732.251263508777     IErMin= 6 ErrMin= 7.24D-05
 ErrMax= 7.24D-05  0.00D+00 EMaxC= 1.00D-01 BMatC= 1.78D-06 BMatP= 2.24D-06
 IDIUse=1 WtCom= 1.00D+00 WtEn= 0.00D+00
 Coeff-Com: -0.382D-02-0.939D+00-0.732D+00-0.145D+01 0.201D+01 0.211D+01
 Coeff:     -0.382D-02-0.939D+00-0.732D+00-0.145D+01 0.201D+01 0.211D+01
 Gap=     0.133 Goal=   None    Shift=    0.000
 Gap=     0.278 Goal=   None    Shift=    0.000
 RMSDP=4.24D-04 MaxDP=4.07D-02 DE=-2.23D-05 OVMax= 2.21D-02

 Cycle  47  Pass 1  IDiag  1:
 RMSU=  1.68D-04    CP:  1.00D+00  7.10D-01  3.00D+00  3.00D+00  3.00D+00
                    CP:  3.00D+00
 E= -732.251301070844     Delta-E=       -0.000037562067 Rises=F Damp=F
 DIIS: error= 4.83D-05 at cycle  47 NSaved=   7.
 NSaved= 7 IEnMin= 7 EnMin= -732.251301070844     IErMin= 7 ErrMin= 4.83D-05
 ErrMax= 4.83D-05  0.00D+00 EMaxC= 1.00D-01 BMatC= 9.24D-07 BMatP= 1.78D-06
 IDIUse=1 WtCom= 1.00D+00 WtEn= 0.00D+00
 Coeff-Com:  0.110D-01 0.371D+00 0.258D+00-0.938D+00-0.129D+01 0.121D+01
 Coeff-Com:  0.138D+01
 Coeff:      0.110D-01 0.371D+00 0.258D+00-0.938D+00-0.129D+01 0.121D+01
 Coeff:      0.138D+01
 Gap=     0.134 Goal=   None    Shift=    0.000
 Gap=     0.278 Goal=   None    Shift=    0.000
 RMSDP=4.52D-04 MaxDP=4.58D-02 DE=-3.76D-05 OVMax= 2.53D-02

 Cycle  48  Pass 1  IDiag  1:
 RMSU=  1.31D-04    CP:  1.00D+00  5.47D-01  3.00D+00  3.00D+00  3.00D+00
                    CP:  3.00D+00  3.00D+00
 E= -732.251322814741     Delta-E=       -0.000021743897 Rises=F Damp=F
 DIIS: error= 2.26D-05 at cycle  48 NSaved=   8.
 NSaved= 8 IEnMin= 8 EnMin= -732.251322814741     IErMin= 8 ErrMin= 2.26D-05
 ErrMax= 2.26D-05  0.00D+00 EMaxC= 1.00D-01 BMatC= 3.67D-07 BMatP= 9.24D-07
 IDIUse=1 WtCom= 1.00D+00 WtEn= 0.00D+00
 Coeff-Com:  0.695D-02-0.105D+00-0.749D-01 0.108D+00 0.520D-01-0.175D+00
 Coeff-Com:  0.145D+00 0.104D+01
 Coeff:      0.695D-02-0.105D+00-0.749D-01 0.108D+00 0.520D-01-0.175D+00
 Coeff:      0.145D+00 0.104D+01
 Gap=     0.134 Goal=   None    Shift=    0.000
 Gap=     0.278 Goal=   None    Shift=    0.000
 RMSDP=1.21D-04 MaxDP=1.24D-02 DE=-2.17D-05 OVMax= 6.70D-03

 Cycle  49  Pass 1  IDiag  1:
 RMSU=  8.64D-05    CP:  1.00D+00  4.97D-01  3.00D+00  3.00D+00  3.00D+00
                    CP:  3.00D+00  3.00D+00  1.28D+00
 E= -732.251325592825     Delta-E=       -0.000002778083 Rises=F Damp=F
 DIIS: error= 1.51D-05 at cycle  49 NSaved=   9.
 NSaved= 9 IEnMin= 9 EnMin= -732.251325592825     IErMin= 9 ErrMin= 1.51D-05
 ErrMax= 1.51D-05  0.00D+00 EMaxC= 1.00D-01 BMatC= 1.57D-07 BMatP= 3.67D-07
 IDIUse=1 WtCom= 1.00D+00 WtEn= 0.00D+00
 Coeff-Com: -0.464D-02-0.371D+00-0.266D+00 0.415D+00 0.969D+00-0.573D+00
 Coeff-Com: -0.745D+00 0.274D+00 0.130D+01
 Coeff:     -0.464D-02-0.371D+00-0.266D+00 0.415D+00 0.969D+00-0.573D+00
 Coeff:     -0.745D+00 0.274D+00 0.130D+01
 Gap=     0.133 Goal=   None    Shift=    0.000
 Gap=     0.278 Goal=   None    Shift=    0.000
 RMSDP=1.28D-04 MaxDP=1.33D-02 DE=-2.78D-06 OVMax= 7.30D-03

 Cycle  50  Pass 1  IDiag  1:
 RMSU=  1.11D-05    CP:  1.00D+00  4.44D-01  3.00D+00  3.00D+00  3.00D+00
                    CP:  3.00D+00  3.00D+00  1.59D+00  2.02D+00
 E= -732.251327083624     Delta-E=       -0.000001490799 Rises=F Damp=F
 DIIS: error= 1.16D-05 at cycle  50 NSaved=  10.
 NSaved=10 IEnMin=10 EnMin= -732.251327083624     IErMin=10 ErrMin= 1.16D-05
 ErrMax= 1.16D-05  0.00D+00 EMaxC= 1.00D-01 BMatC= 6.97D-08 BMatP= 1.57D-07
 IDIUse=1 WtCom= 1.00D+00 WtEn= 0.00D+00
 Coeff-Com: -0.266D-02-0.686D-01-0.442D-01 0.951D-01 0.206D+00-0.134D+00
 Coeff-Com: -0.242D+00-0.105D+00 0.570D+00 0.726D+00
 Coeff:     -0.266D-02-0.686D-01-0.442D-01 0.951D-01 0.206D+00-0.134D+00
 Coeff:     -0.242D+00-0.105D+00 0.570D+00 0.726D+00
 Gap=     0.133 Goal=   None    Shift=    0.000
 Gap=     0.278 Goal=   None    Shift=    0.000
 RMSDP=3.96D-05 MaxDP=4.16D-03 DE=-1.49D-06 OVMax= 2.06D-03

 Cycle  51  Pass 1  IDiag  1:
 RMSU=  7.64D-06    CP:  1.00D+00  4.28D-01  3.00D+00  3.00D+00  3.00D+00
                    CP:  3.00D+00  3.00D+00  1.71D+00  2.32D+00  1.59D+00
 E= -732.251327276354     Delta-E=       -0.000000192730 Rises=F Damp=F
 DIIS: error= 1.24D-05 at cycle  51 NSaved=  11.
 NSaved=11 IEnMin=11 EnMin= -732.251327276354     IErMin=10 ErrMin= 1.16D-05
 ErrMax= 1.24D-05  0.00D+00 EMaxC= 1.00D-01 BMatC= 4.20D-08 BMatP= 6.97D-08
 IDIUse=1 WtCom= 1.00D+00 WtEn= 0.00D+00
 Coeff-Com: -0.196D-03 0.540D-02 0.109D-01 0.138D-02-0.569D-01 0.425D-01
 Coeff-Com:  0.210D-01-0.408D-01-0.579D-01 0.628D-01 0.101D+01
 Coeff:     -0.196D-03 0.540D-02 0.109D-01 0.138D-02-0.569D-01 0.425D-01
 Coeff:      0.210D-01-0.408D-01-0.579D-01 0.628D-01 0.101D+01
 Gap=     0.133 Goal=   None    Shift=    0.000
 Gap=     0.278 Goal=   None    Shift=    0.000
 RMSDP=1.27D-05 MaxDP=1.37D-03 DE=-1.93D-07 OVMax= 4.79D-04

 Cycle  52  Pass 1  IDiag  1:
 RMSU=  4.97D-06    CP:  1.00D+00  4.22D-01  3.00D+00  3.00D+00  3.00D+00
                    CP:  3.00D+00  3.00D+00  1.73D+00  2.37D+00  1.81D+00
                    CP:  1.31D+00
 E= -732.251327420342     Delta-E=       -0.000000143989 Rises=F Damp=F
 DIIS: error= 1.21D-05 at cycle  52 NSaved=  12.
 NSaved=12 IEnMin=12 EnMin= -732.251327420342     IErMin=10 ErrMin= 1.16D-05
 ErrMax= 1.21D-05  0.00D+00 EMaxC= 1.00D-01 BMatC= 3.51D-08 BMatP= 4.20D-08
 IDIUse=1 WtCom= 1.00D+00 WtEn= 0.00D+00
 Coeff-Com:  0.163D-02 0.154D-01 0.189D-01-0.889D-01-0.185D+00 0.217D+00
 Coeff-Com:  0.222D+00 0.496D-01-0.551D+00-0.728D+00 0.310D+00 0.172D+01
 Coeff:      0.163D-02 0.154D-01 0.189D-01-0.889D-01-0.185D+00 0.217D+00
 Coeff:      0.222D+00 0.496D-01-0.551D+00-0.728D+00 0.310D+00 0.172D+01
 Gap=     0.133 Goal=   None    Shift=    0.000
 Gap=     0.278 Goal=   None    Shift=    0.000
 RMSDP=2.90D-05 MaxDP=3.28D-03 DE=-1.44D-07 OVMax= 1.05D-03

 Cycle  53  Pass 1  IDiag  1:
 RMSU=  2.36D-06    CP:  1.00D+00  4.06D-01  3.00D+00  3.00D+00  3.00D+00
                    CP:  3.00D+00  3.00D+00  1.75D+00  2.47D+00  2.34D+00
                    CP:  2.04D+00  3.00D+00
 E= -732.251327728215     Delta-E=       -0.000000307873 Rises=F Damp=F
 DIIS: error= 1.04D-05 at cycle  53 NSaved=  13.
 NSaved=13 IEnMin=13 EnMin= -732.251327728215     IErMin=13 ErrMin= 1.04D-05
 ErrMax= 1.04D-05  0.00D+00 EMaxC= 1.00D-01 BMatC= 2.98D-08 BMatP= 3.51D-08
 IDIUse=1 WtCom= 1.00D+00 WtEn= 0.00D+00
 Coeff-Com: -0.252D-03-0.119D+00-0.795D-01 0.431D-01 0.223D+00 0.128D-01
 Coeff-Com: -0.154D+00-0.459D-01 0.287D+00 0.129D+00-0.158D+01 0.456D+00
 Coeff-Com:  0.183D+01
 Coeff:     -0.252D-03-0.119D+00-0.795D-01 0.431D-01 0.223D+00 0.128D-01
 Coeff:     -0.154D+00-0.459D-01 0.287D+00 0.129D+00-0.158D+01 0.456D+00
 Coeff:      0.183D+01
 Gap=     0.133 Goal=   None    Shift=    0.000
 Gap=     0.278 Goal=   None    Shift=    0.000
 RMSDP=3.35D-05 MaxDP=3.96D-03 DE=-3.08D-07 OVMax= 2.11D-03

 Cycle  54  Pass 1  IDiag  1:
 RMSU=  1.53D-05    CP:  1.00D+00  3.89D-01  3.00D+00  3.00D+00  3.00D+00
                    CP:  3.00D+00  3.00D+00  1.74D+00  2.48D+00  2.78D+00
                    CP:  2.44D+00  3.00D+00  3.00D+00
 E= -732.251328116026     Delta-E=       -0.000000387811 Rises=F Damp=F
 DIIS: error= 8.03D-06 at cycle  54 NSaved=  14.
 NSaved=14 IEnMin=14 EnMin= -732.251328116026     IErMin=14 ErrMin= 8.03D-06
 ErrMax= 8.03D-06  0.00D+00 EMaxC= 1.00D-01 BMatC= 1.84D-08 BMatP= 2.98D-08
 IDIUse=1 WtCom= 1.00D+00 WtEn= 0.00D+00
 Coeff-Com: -0.170D-02-0.773D-01-0.491D-01 0.107D+00 0.164D+00-0.868D-01
 Coeff-Com: -0.225D+00-0.258D-01 0.509D+00 0.487D+00-0.120D+01-0.668D+00
 Coeff-Com:  0.578D+00 0.149D+01
 Coeff:     -0.170D-02-0.773D-01-0.491D-01 0.107D+00 0.164D+00-0.868D-01
 Coeff:     -0.225D+00-0.258D-01 0.509D+00 0.487D+00-0.120D+01-0.668D+00
 Coeff:      0.578D+00 0.149D+01
 Gap=     0.133 Goal=   None    Shift=    0.000
 Gap=     0.278 Goal=   None    Shift=    0.000
 RMSDP=3.85D-05 MaxDP=4.56D-03 DE=-3.88D-07 OVMax= 2.51D-03

 Cycle  55  Pass 1  IDiag  1:
 RMSU=  6.55D-06    CP:  1.00D+00  3.69D-01  3.00D+00  3.00D+00  3.00D+00
                    CP:  3.00D+00  3.00D+00  1.73D+00  2.50D+00  3.00D+00
                    CP:  3.00D+00  3.00D+00  3.00D+00  2.34D+00
 E= -732.251328454725     Delta-E=       -0.000000338699 Rises=F Damp=F
 DIIS: error= 6.20D-06 at cycle  55 NSaved=  15.
 NSaved=15 IEnMin=15 EnMin= -732.251328454725     IErMin=15 ErrMin= 6.20D-06
 ErrMax= 6.20D-06  0.00D+00 EMaxC= 1.00D-01 BMatC= 1.43D-08 BMatP= 1.84D-08
 IDIUse=1 WtCom= 1.00D+00 WtEn= 0.00D+00
 Coeff-Com: -0.704D-03 0.578D-01 0.502D-01 0.472D-01-0.210D+00 0.111D-01
 Coeff-Com:  0.422D-01 0.613D-01-0.566D-01 0.990D-02 0.775D+00-0.246D+00
 Coeff-Com: -0.169D+01 0.932D+00 0.122D+01
 Coeff:     -0.704D-03 0.578D-01 0.502D-01 0.472D-01-0.210D+00 0.111D-01
 Coeff:      0.422D-01 0.613D-01-0.566D-01 0.990D-02 0.775D+00-0.246D+00
 Coeff:     -0.169D+01 0.932D+00 0.122D+01
 Gap=     0.133 Goal=   None    Shift=    0.000
 Gap=     0.278 Goal=   None    Shift=    0.000
 RMSDP=2.78D-05 MaxDP=3.24D-03 DE=-3.39D-07 OVMax= 1.78D-03

 Cycle  56  Pass 1  IDiag  1:
 RMSU=  5.82D-06    CP:  1.00D+00  3.54D-01  3.00D+00  3.00D+00  3.00D+00
                    CP:  3.00D+00  3.00D+00  1.72D+00  2.53D+00  3.00D+00
                    CP:  3.00D+00  3.00D+00  3.00D+00  3.00D+00  2.08D+00
 E= -732.251328625771     Delta-E=       -0.000000171046 Rises=F Damp=F
 DIIS: error= 4.32D-06 at cycle  56 NSaved=  16.
 NSaved=16 IEnMin=16 EnMin= -732.251328625771     IErMin=16 ErrMin= 4.32D-06
 ErrMax= 4.32D-06  0.00D+00 EMaxC= 1.00D-01 BMatC= 7.40D-09 BMatP= 1.43D-08
 IDIUse=1 WtCom= 1.00D+00 WtEn= 0.00D+00
 Coeff-Com:  0.997D-03 0.536D-01 0.443D-01-0.451D-01-0.226D+00 0.138D+00
 Coeff-Com:  0.184D+00 0.265D-01-0.470D+00-0.409D+00 0.137D+01 0.641D+00
 Coeff-Com: -0.180D+01-0.465D+00 0.424D+00 0.153D+01
 Coeff:      0.997D-03 0.536D-01 0.443D-01-0.451D-01-0.226D+00 0.138D+00
 Coeff:      0.184D+00 0.265D-01-0.470D+00-0.409D+00 0.137D+01 0.641D+00
 Coeff:     -0.180D+01-0.465D+00 0.424D+00 0.153D+01
 Gap=     0.133 Goal=   None    Shift=    0.000
 Gap=     0.278 Goal=   None    Shift=    0.000
 RMSDP=3.95D-05 MaxDP=4.59D-03 DE=-1.71D-07 OVMax= 2.73D-03

 Cycle  57  Pass 1  IDiag  1:
 RMSU=  1.53D-05    CP:  1.00D+00  3.33D-01  3.00D+00  3.00D+00  3.00D+00
                    CP:  3.00D+00  3.00D+00  1.69D+00  2.53D+00  3.00D+00
                    CP:  3.00D+00  3.00D+00  3.00D+00  3.00D+00  3.00D+00
                    CP:  3.00D+00
 E= -732.251328758186     Delta-E=       -0.000000132415 Rises=F Damp=F
 DIIS: error= 1.75D-06 at cycle  57 NSaved=  17.
 NSaved=17 IEnMin=17 EnMin= -732.251328758186     IErMin=17 ErrMin= 1.75D-06
 ErrMax= 1.75D-06  0.00D+00 EMaxC= 1.00D-01 BMatC= 1.88D-09 BMatP= 7.40D-09
 IDIUse=1 WtCom= 1.00D+00 WtEn= 0.00D+00
 Coeff-Com:  0.597D-03-0.223D-01-0.152D-01-0.246D-01 0.192D-01 0.610D-01
 Coeff-Com:  0.267D-01-0.276D-01-0.125D+00-0.103D+00 0.140D+00 0.390D+00
 Coeff-Com: -0.885D-01-0.429D+00-0.323D+00 0.539D+00 0.981D+00
 Coeff:      0.597D-03-0.223D-01-0.152D-01-0.246D-01 0.192D-01 0.610D-01
 Coeff:      0.267D-01-0.276D-01-0.125D+00-0.103D+00 0.140D+00 0.390D+00
 Coeff:     -0.885D-01-0.429D+00-0.323D+00 0.539D+00 0.981D+00
 Gap=     0.133 Goal=   None    Shift=    0.000
 Gap=     0.278 Goal=   None    Shift=    0.000
 RMSDP=1.14D-05 MaxDP=1.28D-03 DE=-1.32D-07 OVMax= 7.18D-04

 Cycle  58  Pass 1  IDiag  1:
 RMSU=  2.96D-06    CP:  1.00D+00  3.27D-01  3.00D+00  3.00D+00  3.00D+00
                    CP:  3.00D+00  3.00D+00  1.68D+00  2.53D+00  3.00D+00
                    CP:  3.00D+00  3.00D+00  3.00D+00  3.00D+00  3.00D+00
                    CP:  3.00D+00  1.35D+00
 E= -732.251328770396     Delta-E=       -0.000000012210 Rises=F Damp=F
 DIIS: error= 7.02D-07 at cycle  58 NSaved=  18.
 NSaved=18 IEnMin=18 EnMin= -732.251328770396     IErMin=18 ErrMin= 7.02D-07
 ErrMax= 7.02D-07  0.00D+00 EMaxC= 1.00D-01 BMatC= 4.27D-10 BMatP= 1.88D-09
 IDIUse=1 WtCom= 1.00D+00 WtEn= 0.00D+00
 Coeff-Com: -0.108D-04-0.229D-01-0.170D-01 0.978D-02 0.601D-01-0.126D-01
 Coeff-Com: -0.424D-01-0.121D-01 0.817D-01 0.791D-01-0.375D+00-0.658D-02
 Coeff-Com:  0.455D+00-0.785D-02-0.234D+00-0.243D+00 0.389D+00 0.898D+00
 Coeff:     -0.108D-04-0.229D-01-0.170D-01 0.978D-02 0.601D-01-0.126D-01
 Coeff:     -0.424D-01-0.121D-01 0.817D-01 0.791D-01-0.375D+00-0.658D-02
 Coeff:      0.455D+00-0.785D-02-0.234D+00-0.243D+00 0.389D+00 0.898D+00
 Gap=     0.133 Goal=   None    Shift=    0.000
 Gap=     0.278 Goal=   None    Shift=    0.000
 RMSDP=4.71D-06 MaxDP=5.37D-04 DE=-1.22D-08 OVMax= 3.61D-04

 Cycle  59  Pass 1  IDiag  1:
 RMSU=  3.33D-07    CP:  1.00D+00  3.25D-01  3.00D+00  3.00D+00  3.00D+00
                    CP:  3.00D+00  3.00D+00  1.67D+00  2.53D+00  3.00D+00
                    CP:  3.00D+00  3.00D+00  3.00D+00  3.00D+00  3.00D+00
                    CP:  3.00D+00  1.50D+00  1.51D+00
 E= -732.251328772280     Delta-E=       -0.000000001884 Rises=F Damp=F
 DIIS: error= 2.37D-07 at cycle  59 NSaved=  19.
 NSaved=19 IEnMin=19 EnMin= -732.251328772280     IErMin=19 ErrMin= 2.37D-07
 ErrMax= 2.37D-07  0.00D+00 EMaxC= 1.00D-01 BMatC= 9.67D-11 BMatP= 4.27D-10
 IDIUse=1 WtCom= 1.00D+00 WtEn= 0.00D+00
 Coeff-Com: -0.153D-03 0.179D-02 0.146D-02 0.138D-01 0.187D-02-0.204D-01
 Coeff-Com: -0.184D-01 0.106D-01 0.514D-01 0.415D-01-0.153D+00-0.664D-01
 Coeff-Com:  0.149D+00 0.863D-01-0.314D-02-0.167D+00-0.117D+00 0.179D+00
 Coeff-Com:  0.101D+01
 Coeff:     -0.153D-03 0.179D-02 0.146D-02 0.138D-01 0.187D-02-0.204D-01
 Coeff:     -0.184D-01 0.106D-01 0.514D-01 0.415D-01-0.153D+00-0.664D-01
 Coeff:      0.149D+00 0.863D-01-0.314D-02-0.167D+00-0.117D+00 0.179D+00
 Coeff:      0.101D+01
 Gap=     0.133 Goal=   None    Shift=    0.000
 Gap=     0.278 Goal=   None    Shift=    0.000
 RMSDP=5.60D-07 MaxDP=5.55D-05 DE=-1.88D-09 OVMax= 4.00D-05

 Error on total polarization charges =  0.04429
 SCF Done:  E(UM062X) =  -732.251328772     A.U. after   59 cycles
            NFock= 59  Conv=0.56D-06     -V/T= 2.0649
 <Sx>= 0.0000 <Sy>= 0.0000 <Sz>= 1.5000 <S**2>= 4.7667 S= 1.7398
 <L.S>=  0.00000000000    
 KE= 6.876069640504D+02 PE=-3.316805808915D+03 EE= 1.067672482535D+03
 SMD-CDS (non-electrostatic) energy       (kcal/mol) =       5.67
 (included in total energy above)
 Annihilation of the first spin contaminant:
 S**2 before annihilation     4.7667,   after     3.7778
 Leave Link  502 at Sat May 27 00:48:05 2023, MaxMem=  2684354560 cpu:            2908.1 elap:             291.8
 (Enter /home/xut/apps/g16/l601.exe)
 Copying SCF densities to generalized density rwf, IOpCl= 1 IROHF=0.

 **********************************************************************

            Population analysis using the SCF density.

 **********************************************************************

 Orbital symmetries:
 Alpha Orbitals:
       Occupied  (A) (A) (A) (A) (A) (A) (A) (A) (A) (A) (A) (A)
                 (A) (A) (A) (A) (A) (A) (A) (A) (A) (A) (A) (A)
                 (A) (A) (A) (A) (A) (A) (A) (A) (A) (A) (A) (A)
                 (A) (A) (A) (A) (A) (A) (A) (A) (A) (A) (A) (A)
                 (A) (A) (A)
       Virtual   (A) (A) (A) (A) (A) (A) (A) (A) (A) (A) (A) (A)
                 (A) (A) (A) (A) (A) (A) (A) (A) (A) (A) (A) (A)
                 (A) (A) (A) (A) (A) (A) (A) (A) (A) (A) (A) (A)
                 (A) (A) (A) (A) (A) (A) (A) (A) (A) (A) (A) (A)
                 (A) (A) (A) (A) (A) (A) (A) (A) (A) (A) (A) (A)
                 (A) (A) (A) (A) (A) (A) (A) (A) (A) (A) (A) (A)
                 (A) (A) (A) (A) (A) (A) (A) (A) (A) (A) (A) (A)
                 (A) (A) (A) (A) (A) (A) (A) (A) (A) (A) (A) (A)
                 (A) (A) (A) (A) (A) (A) (A) (A) (A) (A) (A) (A)
                 (A) (A) (A) (A) (A) (A) (A) (A) (A) (A) (A) (A)
                 (A) (A) (A) (A) (A) (A) (A) (A) (A) (A) (A) (A)
                 (A) (A) (A) (A) (A) (A) (A) (A) (A) (A) (A) (A)
                 (A) (A) (A) (A) (A) (A) (A) (A) (A) (A) (A) (A)
                 (A) (A) (A) (A) (A) (A) (A) (A) (A) (A) (A) (A)
                 (A) (A) (A) (A) (A) (A) (A) (A) (A) (A) (A) (A)
                 (A) (A) (A) (A) (A) (A) (A) (A) (A) (A) (A) (A)
                 (A) (A) (A) (A) (A) (A) (A) (A) (A) (A) (A) (A)
                 (A) (A) (A) (A) (A) (A) (A) (A) (A) (A) (A) (A)
                 (A) (A) (A) (A) (A) (A) (A) (A) (A) (A) (A) (A)
                 (A) (A) (A) (A) (A) (A) (A) (A) (A) (A) (A) (A)
                 (A) (A) (A) (A) (A) (A) (A) (A) (A) (A) (A) (A)
                 (A) (A) (A) (A) (A) (A) (A) (A) (A) (A) (A) (A)
                 (A) (A) (A) (A) (A) (A) (A) (A) (A) (A) (A) (A)
 Beta  Orbitals:
       Occupied  (A) (A) (A) (A) (A) (A) (A) (A) (A) (A) (A) (A)
                 (A) (A) (A) (A) (A) (A) (A) (A) (A) (A) (A) (A)
                 (A) (A) (A) (A) (A) (A) (A) (A) (A) (A) (A) (A)
                 (A) (A) (A) (A) (A) (A) (A) (A) (A) (A) (A) (A)
       Virtual   (A) (A) (A) (A) (A) (A) (A) (A) (A) (A) (A) (A)
                 (A) (A) (A) (A) (A) (A) (A) (A) (A) (A) (A) (A)
                 (A) (A) (A) (A) (A) (A) (A) (A) (A) (A) (A) (A)
                 (A) (A) (A) (A) (A) (A) (A) (A) (A) (A) (A) (A)
                 (A) (A) (A) (A) (A) (A) (A) (A) (A) (A) (A) (A)
                 (A) (A) (A) (A) (A) (A) (A) (A) (A) (A) (A) (A)
                 (A) (A) (A) (A) (A) (A) (A) (A) (A) (A) (A) (A)
                 (A) (A) (A) (A) (A) (A) (A) (A) (A) (A) (A) (A)
                 (A) (A) (A) (A) (A) (A) (A) (A) (A) (A) (A) (A)
                 (A) (A) (A) (A) (A) (A) (A) (A) (A) (A) (A) (A)
                 (A) (A) (A) (A) (A) (A) (A) (A) (A) (A) (A) (A)
                 (A) (A) (A) (A) (A) (A) (A) (A) (A) (A) (A) (A)
                 (A) (A) (A) (A) (A) (A) (A) (A) (A) (A) (A) (A)
                 (A) (A) (A) (A) (A) (A) (A) (A) (A) (A) (A) (A)
                 (A) (A) (A) (A) (A) (A) (A) (A) (A) (A) (A) (A)
                 (A) (A) (A) (A) (A) (A) (A) (A) (A) (A) (A) (A)
                 (A) (A) (A) (A) (A) (A) (A) (A) (A) (A) (A) (A)
                 (A) (A) (A) (A) (A) (A) (A) (A) (A) (A) (A) (A)
                 (A) (A) (A) (A) (A) (A) (A) (A) (A) (A) (A) (A)
                 (A) (A) (A) (A) (A) (A) (A) (A) (A) (A) (A) (A)
                 (A) (A) (A) (A) (A) (A) (A) (A) (A) (A) (A) (A)
                 (A) (A) (A) (A) (A) (A) (A) (A) (A) (A) (A) (A)
                 (A) (A) (A) (A) (A) (A) (A) (A) (A) (A) (A) (A)
                 (A) (A) (A)
 The electronic state is 4-A.
 Alpha  occ. eigenvalues --  -19.73803 -19.73265 -19.70866 -19.70571 -19.65160
 Alpha  occ. eigenvalues --  -10.73760 -10.72594 -10.70108 -10.69631 -10.65437
 Alpha  occ. eigenvalues --  -10.62383 -10.60336  -3.14606  -2.08595  -2.07395
 Alpha  occ. eigenvalues --   -2.07343  -1.27509  -1.25029  -1.22966  -1.20610
 Alpha  occ. eigenvalues --   -1.16278  -1.03989  -0.92525  -0.91672  -0.80337
 Alpha  occ. eigenvalues --   -0.78403  -0.76209  -0.71725  -0.68881  -0.65818
 Alpha  occ. eigenvalues --   -0.64347  -0.62109  -0.59007  -0.58274  -0.57463
 Alpha  occ. eigenvalues --   -0.56635  -0.54845  -0.53744  -0.52166  -0.50834
 Alpha  occ. eigenvalues --   -0.49127  -0.48297  -0.46450  -0.43947  -0.41604
 Alpha  occ. eigenvalues --   -0.40262  -0.40027  -0.39728  -0.38675  -0.38668
 Alpha  occ. eigenvalues --   -0.34753
 Alpha virt. eigenvalues --   -0.21416  -0.05229  -0.04364  -0.01771  -0.01382
 Alpha virt. eigenvalues --   -0.00159   0.00310   0.01452   0.01993   0.02352
 Alpha virt. eigenvalues --    0.03533   0.04522   0.05057   0.05120   0.05372
 Alpha virt. eigenvalues --    0.05758   0.06297   0.07495   0.07785   0.09462
 Alpha virt. eigenvalues --    0.09662   0.10316   0.10510   0.10700   0.11274
 Alpha virt. eigenvalues --    0.11564   0.12047   0.12743   0.13212   0.13793
 Alpha virt. eigenvalues --    0.14779   0.14929   0.15325   0.16587   0.16658
 Alpha virt. eigenvalues --    0.17084   0.17420   0.18105   0.18326   0.18639
 Alpha virt. eigenvalues --    0.19124   0.19807   0.20547   0.21435   0.22277
 Alpha virt. eigenvalues --    0.22411   0.22966   0.23657   0.24390   0.24632
 Alpha virt. eigenvalues --    0.25308   0.25389   0.26120   0.26602   0.26772
 Alpha virt. eigenvalues --    0.27332   0.27934   0.29062   0.29358   0.29975
 Alpha virt. eigenvalues --    0.30683   0.31166   0.31926   0.32373   0.33356
 Alpha virt. eigenvalues --    0.33599   0.33826   0.34332   0.34856   0.35259
 Alpha virt. eigenvalues --    0.36673   0.36987   0.37764   0.39107   0.39523
 Alpha virt. eigenvalues --    0.40686   0.41494   0.42912   0.43492   0.43701
 Alpha virt. eigenvalues --    0.48081   0.48902   0.51702   0.52304   0.54169
 Alpha virt. eigenvalues --    0.57751   0.57890   0.58543   0.58949   0.60838
 Alpha virt. eigenvalues --    0.61014   0.61799   0.63918   0.64475   0.64725
 Alpha virt. eigenvalues --    0.65524   0.66917   0.67480   0.67942   0.70030
 Alpha virt. eigenvalues --    0.70036   0.71421   0.72128   0.74502   0.76371
 Alpha virt. eigenvalues --    0.77359   0.78967   0.81749   0.84335   0.85129
 Alpha virt. eigenvalues --    0.85714   0.87463   0.90226   0.90897   0.92529
 Alpha virt. eigenvalues --    0.93317   0.95270   0.97333   0.97957   1.00006
 Alpha virt. eigenvalues --    1.00738   1.02263   1.04631   1.05144   1.07209
 Alpha virt. eigenvalues --    1.07829   1.08240   1.10583   1.10881   1.11428
 Alpha virt. eigenvalues --    1.16032   1.17758   1.17992   1.19335   1.20717
 Alpha virt. eigenvalues --    1.22828   1.23794   1.24978   1.26128   1.26428
 Alpha virt. eigenvalues --    1.27252   1.28528   1.29249   1.31373   1.32072
 Alpha virt. eigenvalues --    1.38786   1.44861   1.46273   1.46920   1.47839
 Alpha virt. eigenvalues --    1.49247   1.50182   1.52770   1.52950   1.54987
 Alpha virt. eigenvalues --    1.57085   1.59922   1.61806   1.62812   1.64776
 Alpha virt. eigenvalues --    1.65753   1.67899   1.70479   1.71118   1.73765
 Alpha virt. eigenvalues --    1.74673   1.76456   1.81318   1.84264   1.85262
 Alpha virt. eigenvalues --    1.86183   1.86819   1.90160   1.90647   1.93566
 Alpha virt. eigenvalues --    1.95893   1.97732   2.01361   2.02777   2.09398
 Alpha virt. eigenvalues --    2.11004   2.12013   2.13144   2.13641   2.16388
 Alpha virt. eigenvalues --    2.17621   2.22595   2.25421   2.28387   2.30744
 Alpha virt. eigenvalues --    2.37816   2.53324   2.54311   2.57988   2.61087
 Alpha virt. eigenvalues --    2.62250   2.62534   2.63575   2.64359   2.70230
 Alpha virt. eigenvalues --    2.71944   2.74457   2.76116   2.77192   2.79868
 Alpha virt. eigenvalues --    2.85989   2.88181   2.92090   2.93306   2.94689
 Alpha virt. eigenvalues --    2.96305   2.98983   3.05737   3.06256   3.07898
 Alpha virt. eigenvalues --    3.08837   3.10552   3.13694   3.15080   3.16480
 Alpha virt. eigenvalues --    3.17299   3.18097   3.18757   3.27250   3.27750
 Alpha virt. eigenvalues --    3.31854   3.34804   3.35176   3.40645   3.41860
 Alpha virt. eigenvalues --    3.45812   3.50483   3.54215   3.59720   3.63172
 Alpha virt. eigenvalues --    3.71215   3.74519   3.86358   3.86962   3.88545
 Alpha virt. eigenvalues --    3.94546   4.06685   4.08815   4.12774   4.14901
 Alpha virt. eigenvalues --    4.17681   4.27726   4.80912   5.04396   5.07416
 Alpha virt. eigenvalues --    5.11131   5.11904   5.13409   5.26180   5.41531
 Alpha virt. eigenvalues --    5.43057   5.44978   5.47608   5.67175   5.69938
 Alpha virt. eigenvalues --    5.75126   5.78573   5.98251   9.13038  23.50180
 Alpha virt. eigenvalues --   23.78928  23.87688  23.90055  23.98906  24.09939
 Alpha virt. eigenvalues --   24.20934  49.92291  49.95495  49.97983  50.01128
 Alpha virt. eigenvalues --   50.09242
  Beta  occ. eigenvalues --  -19.74276 -19.73305 -19.70864 -19.70778 -19.65251
  Beta  occ. eigenvalues --  -10.73728 -10.72793 -10.70122 -10.69726 -10.65599
  Beta  occ. eigenvalues --  -10.62371 -10.60262  -2.93745  -1.88337  -1.82421
  Beta  occ. eigenvalues --   -1.82206  -1.27536  -1.25807  -1.23645  -1.21408
  Beta  occ. eigenvalues --   -1.16497  -1.04803  -0.93856  -0.91846  -0.80747
  Beta  occ. eigenvalues --   -0.78858  -0.76330  -0.71936  -0.69484  -0.66224
  Beta  occ. eigenvalues --   -0.64764  -0.62355  -0.60007  -0.59193  -0.57909
  Beta  occ. eigenvalues --   -0.57250  -0.55474  -0.54477  -0.53057  -0.51877
  Beta  occ. eigenvalues --   -0.50134  -0.49090  -0.48058  -0.46256  -0.42578
  Beta  occ. eigenvalues --   -0.40281  -0.37455  -0.35573
  Beta virt. eigenvalues --   -0.07753  -0.03388  -0.02891  -0.00935   0.00342
  Beta virt. eigenvalues --    0.01949   0.02157   0.02638   0.03031   0.03544
  Beta virt. eigenvalues --    0.03771   0.04063   0.04711   0.05053   0.05204
  Beta virt. eigenvalues --    0.05337   0.05675   0.06015   0.06203   0.06787
  Beta virt. eigenvalues --    0.07758   0.08145   0.09618   0.09720   0.10464
  Beta virt. eigenvalues --    0.10646   0.10823   0.10962   0.11668   0.12210
  Beta virt. eigenvalues --    0.12916   0.12938   0.13663   0.14126   0.14540
  Beta virt. eigenvalues --    0.15113   0.16530   0.16678   0.17114   0.17384
  Beta virt. eigenvalues --    0.17937   0.18120   0.18964   0.19599   0.19817
  Beta virt. eigenvalues --    0.20751   0.21578   0.22006   0.22525   0.23009
  Beta virt. eigenvalues --    0.23841   0.24534   0.24933   0.25550   0.25690
  Beta virt. eigenvalues --    0.26245   0.26781   0.26892   0.27230   0.27825
  Beta virt. eigenvalues --    0.29055   0.29326   0.29946   0.30739   0.31211
  Beta virt. eigenvalues --    0.31988   0.32677   0.33427   0.33752   0.34221
  Beta virt. eigenvalues --    0.34498   0.35096   0.35484   0.36678   0.36834
  Beta virt. eigenvalues --    0.37630   0.38580   0.39418   0.40968   0.41380
  Beta virt. eigenvalues --    0.42833   0.43230   0.43665   0.47876   0.48716
  Beta virt. eigenvalues --    0.51315   0.51768   0.53783   0.57511   0.57892
  Beta virt. eigenvalues --    0.58469   0.58678   0.60427   0.60931   0.61199
  Beta virt. eigenvalues --    0.62661   0.63692   0.64221   0.65231   0.65926
  Beta virt. eigenvalues --    0.66251   0.67376   0.68407   0.69782   0.71115
  Beta virt. eigenvalues --    0.72023   0.73754   0.75130   0.77150   0.77624
  Beta virt. eigenvalues --    0.79861   0.83456   0.84758   0.84893   0.86911
  Beta virt. eigenvalues --    0.89804   0.90670   0.92163   0.93250   0.95029
  Beta virt. eigenvalues --    0.96513   0.97290   0.99532   1.00195   1.02021
  Beta virt. eigenvalues --    1.03899   1.04617   1.06688   1.07550   1.07977
  Beta virt. eigenvalues --    1.10044   1.10401   1.10864   1.15881   1.17300
  Beta virt. eigenvalues --    1.17566   1.19045   1.19690   1.22500   1.23413
  Beta virt. eigenvalues --    1.24228   1.25549   1.26202   1.26956   1.28488
  Beta virt. eigenvalues --    1.28898   1.31356   1.31913   1.38386   1.44586
  Beta virt. eigenvalues --    1.46046   1.46604   1.47432   1.48683   1.49701
  Beta virt. eigenvalues --    1.52305   1.52726   1.54680   1.55931   1.59444
  Beta virt. eigenvalues --    1.61574   1.62475   1.64503   1.65588   1.67484
  Beta virt. eigenvalues --    1.69941   1.70660   1.73512   1.74024   1.75670
  Beta virt. eigenvalues --    1.80756   1.83810   1.84881   1.85485   1.86489
  Beta virt. eigenvalues --    1.89571   1.90277   1.93326   1.95710   1.97261
  Beta virt. eigenvalues --    2.00880   2.02183   2.08984   2.10623   2.11532
  Beta virt. eigenvalues --    2.12456   2.13173   2.15890   2.17188   2.22116
  Beta virt. eigenvalues --    2.24383   2.27533   2.29972   2.37284   2.52770
  Beta virt. eigenvalues --    2.54090   2.56714   2.60503   2.61633   2.62028
  Beta virt. eigenvalues --    2.63405   2.63968   2.69692   2.71861   2.74160
  Beta virt. eigenvalues --    2.75603   2.75996   2.79298   2.84212   2.88234
  Beta virt. eigenvalues --    2.91564   2.92225   2.94263   2.95985   2.98517
  Beta virt. eigenvalues --    3.05393   3.05921   3.06476   3.08305   3.09711
  Beta virt. eigenvalues --    3.13132   3.14381   3.16337   3.16800   3.17584
  Beta virt. eigenvalues --    3.18235   3.27175   3.27439   3.31402   3.34572
  Beta virt. eigenvalues --    3.34804   3.40141   3.41536   3.45472   3.50208
  Beta virt. eigenvalues --    3.53751   3.59382   3.62940   3.71061   3.73795
  Beta virt. eigenvalues --    3.85985   3.86622   3.88232   3.94527   4.06430
  Beta virt. eigenvalues --    4.07928   4.12151   4.14571   4.17085   4.26874
  Beta virt. eigenvalues --    4.78960   5.04358   5.06071   5.10459   5.11517
  Beta virt. eigenvalues --    5.12634   5.26039   5.41454   5.42664   5.44945
  Beta virt. eigenvalues --    5.47484   5.67023   5.69769   5.75021   5.78403
  Beta virt. eigenvalues --    5.98219   9.13041  23.49944  23.78899  23.87359
  Beta virt. eigenvalues --   23.89472  23.98265  24.09757  24.20795  49.92577
  Beta virt. eigenvalues --   49.95535  49.98059  50.01342  50.09326
          Condensed to atoms (all electrons):
               1          2          3          4          5          6
     1  C   21.276677  -5.978980  -1.447524   3.755867  -8.989068  -2.747352
     2  C   -5.978980  29.828434  -1.439082  -9.743551   2.656785  -8.540974
     3  C   -1.447524  -1.439082  18.748562  -6.832248  -3.789572   1.670347
     4  C    3.755867  -9.743551  -6.832248  36.058820  -5.397187 -10.488617
     5  C   -8.989068   2.656785  -3.789572  -5.397187  21.732302   0.425099
     6  C   -2.747352  -8.540974   1.670347 -10.488617   0.425099  24.510351
     7  H   -0.250442   0.765861  -0.073297  -0.037652   0.095606  -0.099152
     8  H    0.096123  -0.070539   0.150536   0.709453  -0.410963  -0.071604
     9  C    0.105368  -1.624927  -1.807655  -0.869609  -0.233665   0.776782
    10  O    0.060362   0.088409  -0.091177  -0.115110  -0.120963   0.005386
    11  H   -0.037088   0.045657  -0.077865  -0.002231   0.151432  -0.004696
    12  O    0.058280   0.065692  -0.195670  -0.137314   0.007258   0.032311
    13  O    0.019140   0.046374  -0.175960   0.187204   0.260345  -0.344511
    14  H   -0.133447   0.031773   0.086713  -0.186514   0.162156   0.046433
    15  O    0.091394  -0.045442   0.003961  -0.068114  -0.596632   0.782097
    16  H   -0.271882  -0.113545   0.009454   0.030593   0.146705   0.200748
    17  O    0.539015   0.264221   0.017451   0.036395  -0.037148  -0.712704
    18  H    0.131969  -0.234889  -0.039703   0.012950   0.003332   0.141686
    19  Cr   0.057922   0.000507  -0.311650   0.217464   0.088000  -0.071478
               7          8          9         10         11         12
     1  C   -0.250442   0.096123   0.105368   0.060362  -0.037088   0.058280
     2  C    0.765861  -0.070539  -1.624927   0.088409   0.045657   0.065692
     3  C   -0.073297   0.150536  -1.807655  -0.091177  -0.077865  -0.195670
     4  C   -0.037652   0.709453  -0.869609  -0.115110  -0.002231  -0.137314
     5  C    0.095606  -0.410963  -0.233665  -0.120963   0.151432   0.007258
     6  C   -0.099152  -0.071604   0.776782   0.005386  -0.004696   0.032311
     7  H    0.398963   0.002606  -0.074249  -0.000556   0.000116   0.001865
     8  H    0.002606   0.493871  -0.039037  -0.005415  -0.021247  -0.001957
     9  C   -0.074249  -0.039037   9.017757   0.310313  -0.063826   0.517148
    10  O   -0.000556  -0.005415   0.310313   7.880198   0.274272  -0.104214
    11  H    0.000116  -0.021247  -0.063826   0.274272   0.343199   0.014849
    12  O    0.001865  -0.001957   0.517148  -0.104214   0.014849   8.112313
    13  O    0.000790  -0.048327  -0.002557   0.000208   0.001237   0.000044
    14  H    0.000694   0.001269   0.002524  -0.000255  -0.000271   0.000117
    15  O    0.000443   0.000721  -0.001482  -0.000022  -0.000151  -0.000028
    16  H   -0.001944   0.000679   0.000227   0.000083  -0.000032   0.000011
    17  O   -0.010396  -0.000922   0.002952   0.000086   0.000147   0.000320
    18  H   -0.011359   0.000201  -0.001113  -0.000114   0.000123  -0.000555
    19  Cr   0.000639  -0.029998  -0.008873  -0.001542   0.004635  -0.000423
              13         14         15         16         17         18
     1  C    0.019140  -0.133447   0.091394  -0.271882   0.539015   0.131969
     2  C    0.046374   0.031773  -0.045442  -0.113545   0.264221  -0.234889
     3  C   -0.175960   0.086713   0.003961   0.009454   0.017451  -0.039703
     4  C    0.187204  -0.186514  -0.068114   0.030593   0.036395   0.012950
     5  C    0.260345   0.162156  -0.596632   0.146705  -0.037148   0.003332
     6  C   -0.344511   0.046433   0.782097   0.200748  -0.712704   0.141686
     7  H    0.000790   0.000694   0.000443  -0.001944  -0.010396  -0.011359
     8  H   -0.048327   0.001269   0.000721   0.000679  -0.000922   0.000201
     9  C   -0.002557   0.002524  -0.001482   0.000227   0.002952  -0.001113
    10  O    0.000208  -0.000255  -0.000022   0.000083   0.000086  -0.000114
    11  H    0.001237  -0.000271  -0.000151  -0.000032   0.000147   0.000123
    12  O    0.000044   0.000117  -0.000028   0.000011   0.000320  -0.000555
    13  O    8.031752   0.265740   0.012989   0.000195  -0.000025   0.000045
    14  H    0.265740   0.332989   0.003655  -0.001301  -0.000106  -0.000524
    15  O    0.012989   0.003655   7.725376   0.266379   0.015565  -0.001323
    16  H    0.000195  -0.001301   0.266379   0.338016   0.005608   0.002111
    17  O   -0.000025  -0.000106   0.015565   0.005608   7.886953   0.274045
    18  H    0.000045  -0.000524  -0.001323   0.002111   0.274045   0.346402
    19  Cr   0.112661  -0.018355  -0.000496  -0.000770   0.000145   0.000148
              19
     1  C    0.057922
     2  C    0.000507
     3  C   -0.311650
     4  C    0.217464
     5  C    0.088000
     6  C   -0.071478
     7  H    0.000639
     8  H   -0.029998
     9  C   -0.008873
    10  O   -0.001542
    11  H    0.004635
    12  O   -0.000423
    13  O    0.112661
    14  H   -0.018355
    15  O   -0.000496
    16  H   -0.000770
    17  O    0.000145
    18  H    0.000148
    19  Cr  12.108929
          Atomic-Atomic Spin Densities.
               1          2          3          4          5          6
     1  C   -0.001719   0.185091  -0.057405  -0.402260  -0.032834   0.049204
     2  C    0.185091   0.821501  -0.143585  -0.167934  -0.022115  -0.432071
     3  C   -0.057405  -0.143585   2.934361  -2.094477  -1.868345   0.566747
     4  C   -0.402260  -0.167934  -2.094477   3.222183   1.008449  -1.225672
     5  C   -0.032834  -0.022115  -1.868345   1.008449   1.537798  -0.481140
     6  C    0.049204  -0.432071   0.566747  -1.225672  -0.481140   1.004778
     7  H    0.004675   0.001463  -0.022046   0.033768   0.009794  -0.014114
     8  H    0.003181  -0.018743   0.216096  -0.107195  -0.152537   0.022709
     9  C    0.066360  -0.125727   0.267290  -0.273432  -0.159266   0.115087
    10  O   -0.000950   0.000297   0.041014  -0.035946  -0.016675   0.002048
    11  H   -0.002540  -0.001778  -0.045761   0.034481   0.026216  -0.001058
    12  O    0.004607   0.000576   0.020355  -0.012818  -0.007204   0.001860
    13  O   -0.007474   0.018407  -0.048928   0.038892   0.036708  -0.041706
    14  H    0.008951  -0.010933   0.007879  -0.006598  -0.025182   0.025805
    15  O   -0.011753  -0.011110   0.005210   0.004637   0.023082   0.082073
    16  H   -0.014278   0.005674   0.006176  -0.013893   0.002417   0.013698
    17  O    0.047999  -0.008407   0.004061   0.006093  -0.000118  -0.002603
    18  H   -0.007723   0.011534  -0.006507  -0.002821   0.005520  -0.000097
    19  Cr   0.005962   0.008526  -0.157192   0.029209   0.127910  -0.013473
               7          8          9         10         11         12
     1  C    0.004675   0.003181   0.066360  -0.000950  -0.002540   0.004607
     2  C    0.001463  -0.018743  -0.125727   0.000297  -0.001778   0.000576
     3  C   -0.022046   0.216096   0.267290   0.041014  -0.045761   0.020355
     4  C    0.033768  -0.107195  -0.273432  -0.035946   0.034481  -0.012818
     5  C    0.009794  -0.152537  -0.159266  -0.016675   0.026216  -0.007204
     6  C   -0.014114   0.022709   0.115087   0.002048  -0.001058   0.001860
     7  H   -0.000329  -0.001159  -0.013274  -0.000153   0.000195  -0.000363
     8  H   -0.001159   0.029822   0.031023   0.004401  -0.006476   0.000263
     9  C   -0.013274   0.031023   0.147308  -0.001101  -0.005293   0.001020
    10  O   -0.000153   0.004401  -0.001101   0.008414  -0.002970  -0.000432
    11  H    0.000195  -0.006476  -0.005293  -0.002970   0.003396  -0.000127
    12  O   -0.000363   0.000263   0.001020  -0.000432  -0.000127  -0.056778
    13  O    0.000277  -0.003026  -0.003336   0.000044  -0.000140   0.000004
    14  H   -0.000213   0.001096   0.000176   0.000032  -0.000015  -0.000011
    15  O   -0.000267  -0.000255   0.000635  -0.000001   0.000019  -0.000001
    16  H    0.000220   0.000090   0.001110   0.000003  -0.000022   0.000015
    17  O   -0.000391   0.000036  -0.000982   0.000008  -0.000006   0.000013
    18  H    0.000828  -0.000148   0.000254  -0.000021   0.000005   0.000016
    19  Cr   0.000437  -0.021493  -0.009991  -0.001320   0.001786  -0.000059
              13         14         15         16         17         18
     1  C   -0.007474   0.008951  -0.011753  -0.014278   0.047999  -0.007723
     2  C    0.018407  -0.010933  -0.011110   0.005674  -0.008407   0.011534
     3  C   -0.048928   0.007879   0.005210   0.006176   0.004061  -0.006507
     4  C    0.038892  -0.006598   0.004637  -0.013893   0.006093  -0.002821
     5  C    0.036708  -0.025182   0.023082   0.002417  -0.000118   0.005520
     6  C   -0.041706   0.025805   0.082073   0.013698  -0.002603  -0.000097
     7  H    0.000277  -0.000213  -0.000267   0.000220  -0.000391   0.000828
     8  H   -0.003026   0.001096  -0.000255   0.000090   0.000036  -0.000148
     9  C   -0.003336   0.000176   0.000635   0.001110  -0.000982   0.000254
    10  O    0.000044   0.000032  -0.000001   0.000003   0.000008  -0.000021
    11  H   -0.000140  -0.000015   0.000019  -0.000022  -0.000006   0.000005
    12  O    0.000004  -0.000011  -0.000001   0.000015   0.000013   0.000016
    13  O   -0.000238  -0.002584  -0.002723  -0.000583   0.000040  -0.000014
    14  H   -0.002584   0.003388   0.000611   0.001194  -0.000016   0.000074
    15  O   -0.002723   0.000611  -0.269523  -0.000634  -0.002570   0.000219
    16  H   -0.000583   0.001194  -0.000634   0.000514   0.000354  -0.000614
    17  O    0.000040  -0.000016  -0.002570   0.000354  -0.116072  -0.001269
    18  H   -0.000014   0.000074   0.000219  -0.000614  -0.001269   0.001464
    19  Cr  -0.007399  -0.000258  -0.000043  -0.000317   0.000017   0.000031
              19
     1  C    0.005962
     2  C    0.008526
     3  C   -0.157192
     4  C    0.029209
     5  C    0.127910
     6  C   -0.013473
     7  H    0.000437
     8  H   -0.021493
     9  C   -0.009991
    10  O   -0.001320
    11  H    0.001786
    12  O   -0.000059
    13  O   -0.007399
    14  H   -0.000258
    15  O   -0.000043
    16  H   -0.000317
    17  O    0.000017
    18  H    0.000031
    19  Cr   4.038044
 Mulliken charges and spin densities:
               1          2
     1  C   -0.336334  -0.162908
     2  C   -0.001781   0.110666
     3  C    1.594377  -0.375056
     4  C   -1.130599   0.034667
     5  C   -0.153823   0.012477
     6  C    0.489847  -0.327924
     7  H    0.291463  -0.000653
     8  H    0.244549  -0.002313
     9  C   -0.006078   0.037862
    10  O   -0.179951  -0.003307
    11  H    0.371740  -0.000088
    12  O   -0.370049  -0.049062
    13  O   -0.367345  -0.023778
    14  H    0.406709   0.003396
    15  O   -0.188889  -0.182396
    16  H    0.388664   0.001123
    17  O   -0.281603  -0.073814
    18  H    0.376567   0.000732
    19  Cr   1.852536   4.000376
 Sum of Mulliken charges =   3.00000   3.00000
 Mulliken charges and spin densities with hydrogens summed into heavy atoms:
               1          2
     1  C   -0.336334  -0.162908
     2  C    0.289682   0.110014
     3  C    1.594377  -0.375056
     4  C   -0.886050   0.032354
     5  C   -0.153823   0.012477
     6  C    0.489847  -0.327924
     9  C   -0.006078   0.037862
    10  O    0.191789  -0.003395
    12  O   -0.370049  -0.049062
    13  O    0.039363  -0.020382
    15  O    0.199775  -0.181273
    17  O    0.094964  -0.073082
    19  Cr   1.852536   4.000376
 Electronic spatial extent (au):  <R**2>=           3046.1586
 Charge=              3.0000 electrons
 Dipole moment (field-independent basis, Debye):
    X=            -30.6628    Y=              0.2320    Z=              1.3108  Tot=             30.6917
 Quadrupole moment (field-independent basis, Debye-Ang):
   XX=             35.2089   YY=            -43.3548   ZZ=            -72.2679
   XY=             48.3229   XZ=              4.6220   YZ=              4.5596
 Traceless Quadrupole moment (field-independent basis, Debye-Ang):
   XX=             62.0135   YY=            -16.5502   ZZ=            -45.4633
   XY=             48.3229   XZ=              4.6220   YZ=              4.5596
 Octapole moment (field-independent basis, Debye-Ang**2):
  XXX=           -491.6764  YYY=             51.7727  ZZZ=              2.3285  XYY=            -90.3812
  XXY=             -3.8122  XXZ=             12.3469  XZZ=            -37.2439  YZZ=             -3.0029
  YYZ=             19.7892  XYZ=             17.0183
 Hexadecapole moment (field-independent basis, Debye-Ang**3):
 XXXX=           -601.3484 YYYY=          -1416.1128 ZZZZ=            -67.3446 XXXY=            700.9325
 XXXZ=             31.4415 YYYX=            278.6164 YYYZ=             75.1207 ZZZX=             -0.0317
 ZZZY=              2.1241 XXYY=           -546.4029 XXZZ=           -315.8391 YYZZ=           -271.5756
 XXYZ=             17.8527 YYXZ=             33.4004 ZZXY=             30.1353
 N-N= 8.292750335577D+02 E-N=-3.316805843581D+03  KE= 6.876069640504D+02
                          Isotropic Fermi Contact Couplings
        Atom                 a.u.       MegaHertz       Gauss      10(-4) cm-1
     1  C(13)             -0.01288      -4.82552      -1.72187      -1.60962
     2  C(13)              0.02431       9.10825       3.25005       3.03819
     3  C(13)             -0.03969     -14.87436      -5.30754      -4.96155
     4  C(13)              0.01112       4.16716       1.48695       1.39002
     5  C(13)              0.01025       3.84064       1.37044       1.28110
     6  C(13)             -0.03814     -14.29153      -5.09957      -4.76714
     7  H(1)              -0.00081      -1.20455      -0.42981      -0.40179
     8  H(1)               0.00073       1.08444       0.38696       0.36173
     9  C(13)              0.01608       6.02672       2.15048       2.01030
    10  O(17)              0.00078      -0.15739      -0.05616      -0.05250
    11  H(1)               0.00005       0.07658       0.02733       0.02554
    12  O(17)             -0.01047       2.11535       0.75481       0.70561
    13  O(17)             -0.01441       2.91136       1.03885       0.97113
    14  H(1)               0.00106       1.58146       0.56430       0.52752
    15  O(17)             -0.05810      11.73997       4.18911       3.91603
    16  H(1)               0.00057       0.85460       0.30494       0.28507
    17  O(17)             -0.02273       4.59271       1.63879       1.53196
    18  H(1)               0.00026       0.38328       0.13676       0.12785
    19  Cr(53)            -0.00001       0.00077       0.00028       0.00026
 --------------------------------------------------------
       Center         ----  Spin Dipole Couplings  ----
                      3XX-RR        3YY-RR        3ZZ-RR
 --------------------------------------------------------
     1   Atom        0.094809      0.105360     -0.200169
     2   Atom       -0.038542     -0.051782      0.090324
     3   Atom        0.171912      0.150477     -0.322389
     4   Atom        0.035944     -0.003505     -0.032439
     5   Atom        0.056369      0.023579     -0.079949
     6   Atom        0.209135      0.200007     -0.409142
     7   Atom        0.004484     -0.007469      0.002985
     8   Atom        0.039199     -0.019372     -0.019827
     9   Atom       -0.008155     -0.014870      0.023025
    10   Atom        0.006237     -0.000135     -0.006102
    11   Atom        0.010389     -0.006283     -0.004106
    12   Atom        0.101815      0.097644     -0.199458
    13   Atom        0.046774      0.039833     -0.086607
    14   Atom       -0.020529      0.041056     -0.020527
    15   Atom        0.386778      0.434401     -0.821179
    16   Atom        0.002474     -0.009895      0.007421
    17   Atom        0.146042      0.212930     -0.358972
    18   Atom       -0.016425      0.012253      0.004172
    19   Atom       -0.408674     -0.497818      0.906492
 --------------------------------------------------------
                        XY            XZ            YZ
 --------------------------------------------------------
     1   Atom       -0.003269      0.001445      0.007121
     2   Atom        0.004836     -0.002737     -0.001738
     3   Atom        0.006259      0.008626      0.009011
     4   Atom        0.005155      0.004017     -0.014189
     5   Atom        0.013038     -0.001533     -0.018780
     6   Atom        0.013707     -0.001878      0.036904
     7   Atom        0.000481     -0.000012      0.000108
     8   Atom       -0.022729     -0.002131      0.000541
     9   Atom        0.001085     -0.000273     -0.000500
    10   Atom       -0.004794     -0.001554     -0.001762
    11   Atom       -0.010550     -0.000334      0.000162
    12   Atom       -0.002991      0.006458     -0.009294
    13   Atom        0.064975      0.004271     -0.014627
    14   Atom        0.032990     -0.011146     -0.017227
    15   Atom       -0.092577      0.329387      0.273220
    16   Atom       -0.023884     -0.010061     -0.016612
    17   Atom        0.035662      0.168371     -0.074344
    18   Atom        0.004993     -0.008946      0.000271
    19   Atom       -1.483008      0.152223      0.160706
 --------------------------------------------------------


 ---------------------------------------------------------------------------------
              Anisotropic Spin Dipole Couplings in Principal Axis System
 ---------------------------------------------------------------------------------

       Atom             a.u.   MegaHertz   Gauss  10(-4) cm-1        Axes

              Baa    -0.2003   -26.884    -9.593    -8.968 -0.0052 -0.0233  0.9997
     1 C(13)  Bbb     0.0939    12.603     4.497     4.204  0.9633  0.2681  0.0112
              Bcc     0.1064    14.281     5.096     4.764 -0.2683  0.9631  0.0211
 
              Baa    -0.0534    -7.161    -2.555    -2.389 -0.3092  0.9510  0.0056
     2 C(13)  Bbb    -0.0370    -4.971    -1.774    -1.658  0.9507  0.3090  0.0246
              Bcc     0.0904    12.132     4.329     4.047 -0.0217 -0.0130  0.9997
 
              Baa    -0.3227   -43.304   -15.452   -14.445 -0.0172 -0.0188  0.9997
     3 C(13)  Bbb     0.1489    19.977     7.128     6.664 -0.2668  0.9636  0.0135
              Bcc     0.1738    23.327     8.324     7.781  0.9636  0.2665  0.0216
 
              Baa    -0.0387    -5.189    -1.852    -1.731 -0.0760  0.3827  0.9207
     4 C(13)  Bbb     0.0020     0.267     0.095     0.089 -0.0932  0.9166 -0.3887
              Bcc     0.0367     4.922     1.756     1.642  0.9927  0.1153  0.0340
 
              Baa    -0.0833   -11.172    -3.986    -3.727 -0.0054  0.1738  0.9848
     5 C(13)  Bbb     0.0219     2.939     1.049     0.980 -0.3553  0.9202 -0.1643
              Bcc     0.0614     8.233     2.938     2.746  0.9347  0.3508 -0.0568
 
              Baa    -0.4114   -55.203   -19.698   -18.414  0.0044 -0.0603  0.9982
     6 C(13)  Bbb     0.1917    25.723     9.179     8.580 -0.6137  0.7880  0.0503
              Bcc     0.2197    29.481    10.519     9.834  0.7896  0.6127  0.0336
 
              Baa    -0.0075    -3.996    -1.426    -1.333 -0.0401  0.9991 -0.0104
     7 H(1)   Bbb     0.0030     1.593     0.569     0.531  0.0047  0.0106  0.9999
              Bcc     0.0045     2.403     0.857     0.801  0.9992  0.0401 -0.0051
 
              Baa    -0.0272   -14.492    -5.171    -4.834  0.3246  0.9455  0.0245
     8 H(1)   Bbb    -0.0199   -10.614    -3.788    -3.541  0.0230 -0.0338  0.9992
              Bcc     0.0471    25.107     8.959     8.375  0.9456 -0.3238 -0.0327
 
              Baa    -0.0150    -2.019    -0.720    -0.673 -0.1550  0.9878  0.0119
     9 C(13)  Bbb    -0.0080    -1.072    -0.382    -0.358  0.9879  0.1549  0.0112
              Bcc     0.0230     3.091     1.103     1.031 -0.0092 -0.0135  0.9999
 
              Baa    -0.0073     0.526     0.188     0.175  0.2380  0.3807  0.8935
    10 O(17)  Bbb    -0.0016     0.113     0.040     0.038  0.4020  0.7989 -0.4474
              Bcc     0.0088    -0.639    -0.228    -0.213  0.8842 -0.4657 -0.0371
 
              Baa    -0.0114    -6.079    -2.169    -2.028  0.4359  0.9000 -0.0000
    11 H(1)   Bbb    -0.0041    -2.195    -0.783    -0.732  0.0170 -0.0082  0.9998
              Bcc     0.0155     8.273     2.952     2.760  0.8998 -0.4358 -0.0189
 
              Baa    -0.1999    14.463     5.161     4.824 -0.0211  0.0310  0.9993
    12 O(17)  Bbb     0.0962    -6.959    -2.483    -2.321  0.4834  0.8753 -0.0170
              Bcc     0.1037    -7.504    -2.678    -2.503  0.8752 -0.4827  0.0334
 
              Baa    -0.0896     6.481     2.312     2.162 -0.1098  0.1659  0.9800
    13 O(17)  Bbb    -0.0191     1.379     0.492     0.460 -0.6824  0.7043 -0.1957
              Bcc     0.1086    -7.860    -2.805    -2.622  0.7227  0.6903 -0.0359
 
              Baa    -0.0359   -19.154    -6.835    -6.389  0.9005 -0.3202  0.2941
    14 H(1)   Bbb    -0.0246   -13.103    -4.676    -4.371 -0.1829  0.3347  0.9244
              Bcc     0.0605    32.258    11.510    10.760  0.3944  0.8863 -0.2428
 
              Baa    -0.9643    69.777    24.898    23.275 -0.2450 -0.2015  0.9484
    15 O(17)  Bbb     0.4576   -33.112   -11.815   -11.045  0.8026  0.5066  0.3150
              Bcc     0.5067   -36.665   -13.083   -12.230 -0.5439  0.8383  0.0376
 
              Baa    -0.0368   -19.642    -7.009    -6.552  0.5487  0.7339  0.4004
    16 H(1)   Bbb     0.0151     8.076     2.882     2.694 -0.4938 -0.1020  0.8636
              Bcc     0.0217    11.567     4.127     3.858  0.6746 -0.6715  0.3064
 
              Baa    -0.4204    30.423    10.856    10.148 -0.2899  0.1277  0.9485
    17 O(17)  Bbb     0.1921   -13.898    -4.959    -4.636  0.8748 -0.3666  0.3168
              Bcc     0.2284   -16.526    -5.897    -5.512  0.3881  0.9216 -0.0054
 
              Baa    -0.0205   -10.919    -3.896    -3.642  0.9296 -0.1447  0.3391
    18 H(1)   Bbb     0.0071     3.810     1.359     1.271 -0.2989  0.2429  0.9229
              Bcc     0.0133     7.110     2.537     2.372  0.2159  0.9592 -0.1826
 
              Baa    -1.9541    59.050    21.070    19.697  0.6943  0.7156 -0.0771
    19 Cr(53) Bbb     0.9236   -27.909    -9.959    -9.309  0.0716  0.0380  0.9967
              Bcc     1.0305   -31.141   -11.112   -10.387  0.7161 -0.6975 -0.0249
 

 ---------------------------------------------------------------------------------

 No NMR shielding tensors so no spin-rotation constants.
 Leave Link  601 at Sat May 27 00:48:05 2023, MaxMem=  2684354560 cpu:               2.1 elap:               0.2
 (Enter /home/xut/apps/g16/l701.exe)
 ... and contract with generalized density number  0.
 Compute integral first derivatives.
   1 Symmetry operations used in ECPInt.
 ECPInt:  NShTT=    6105 NPrTT=   23469 LenC2=    5802 LenP2D=   15807.
 LDataN:  DoStor=T MaxTD1= 5 Len=  102
 D1PCM: PCM CHGder 1st derivatives, ID1Alg=3 FixD1E=F DoIter=F DoCFld=F I1PDM=0.
 GePol: Maximum number of non-zero 1st derivatives   =     190
 Leave Link  701 at Sat May 27 00:48:06 2023, MaxMem=  2684354560 cpu:              10.1 elap:               1.0
 (Enter /home/xut/apps/g16/l702.exe)
 L702 exits ... SP integral derivatives will be done elsewhere.
 Leave Link  702 at Sat May 27 00:48:06 2023, MaxMem=  2684354560 cpu:               0.1 elap:               0.0
 (Enter /home/xut/apps/g16/l703.exe)
 Integral derivatives from FoFJK, PRISM(SPDF).
 Compute integral first derivatives, UseDBF=F ICtDFT=           0.
 Calling FoFJK, ICntrl=      2127 FMM=F ISym2X=0 I1Cent= 0 IOpClX= 1 NMat=1 NMatS=1 NMatT=0.
 FoFJK:  IHMeth= 1 ICntrl=    2127 DoSepK=F KAlg= 0 I1Cent=           0 FoldK=F
 IRaf=         0 NMat=       1 IRICut=       1 DoRegI=T DoRafI=F ISym2E= 0 IDoP0=0 IntGTp=1.
 FoFCou: FMM=F IPFlag=           0 FMFlag=      100000 FMFlg1=         800
         NFxFlg=           0 DoJE=F BraDBF=F KetDBF=F FulRan=T
         wScrn=  0.000000 ICntrl=      2127 IOpCl=  1 I1Cent=           0 NGrid=           0
         NMat0=    1 NMatS0=      1 NMatT0=    0 NMatD0=    1 NMtDS0=    0 NMtDT0=    0
 Symmetry not used in FoFCou.
 Leave Link  703 at Sat May 27 00:48:17 2023, MaxMem=  2684354560 cpu:             107.1 elap:              10.7
 (Enter /home/xut/apps/g16/l716.exe)
 Dipole        =-1.20636815D+01 9.12784907D-02 5.15719446D-01
 ***** Axes restored to original set *****
 -------------------------------------------------------------------
 Center     Atomic                   Forces (Hartrees/Bohr)
 Number     Number              X              Y              Z
 -------------------------------------------------------------------
      1        6          -0.074404469    0.054434316   -0.003809336
      2        6          -0.003506655   -0.026635097   -0.001013673
      3        6          -0.013381682   -0.001556648   -0.001630013
      4        6           0.023838654    0.032552844   -0.001944146
      5        6           0.044039324   -0.039621320    0.007066197
      6        6           0.052853978    0.104489757   -0.001575014
      7        1          -0.009725596   -0.000228553    0.000206076
      8        1           0.011485555   -0.003084183   -0.000278324
      9        6          -0.066274984    0.019481914    0.000801361
     10        8          -0.008560477   -0.012511075    0.000070366
     11        1           0.006974661    0.004336297    0.000089599
     12        8           0.070959558    0.006306192   -0.000512916
     13        8          -0.064559490   -0.001367449   -0.002592368
     14        1           0.007724857    0.011110259    0.003992255
     15        8          -0.022052811   -0.098568119    0.001414066
     16        1          -0.014445039    0.011853131   -0.000804918
     17        8           0.064661322   -0.046646846    0.002895586
     18        1          -0.010543371   -0.005926534   -0.001850088
     19       24           0.004916663   -0.008418884   -0.000524710
 -------------------------------------------------------------------
 Cartesian Forces:  Max     0.104489757 RMS     0.032510936
 Leave Link  716 at Sat May 27 00:48:17 2023, MaxMem=  2684354560 cpu:               0.2 elap:               0.0
 (Enter /home/xut/apps/g16/l103.exe)

 GradGradGradGradGradGradGradGradGradGradGradGradGradGradGradGradGradGrad
 Berny optimization.
 FormGI is forming the generalized inverse of G from B-inverse, IUseBI=4.
 Internal  Forces:  Max     0.093873395 RMS     0.018180534
 Search for a local minimum.
 Step number   1 out of a maximum of   94
 All quantities printed in internal units (Hartrees-Bohrs-Radians)
 RMS Force = .18181D-01 SwitMx=.10000D-02 MixMth= 1
 Mixed Optimization -- RFO/linear search
 Second derivative matrix not updated -- first step.
 ITU=  0
     Eigenvalues ---    0.00237   0.01157   0.01295   0.01295   0.01295
     Eigenvalues ---    0.01513   0.01851   0.01941   0.02053   0.02068
     Eigenvalues ---    0.02094   0.02101   0.02131   0.02294   0.02407
     Eigenvalues ---    0.02997   0.12458   0.16000   0.16000   0.16000
     Eigenvalues ---    0.16000   0.16000   0.16000   0.22334   0.23474
     Eigenvalues ---    0.23493   0.25000   0.25000   0.25000   0.25000
     Eigenvalues ---    0.25000   0.25000   0.25000   0.28519   0.37230
     Eigenvalues ---    0.37230   0.40989   0.40989   0.40989   0.41635
     Eigenvalues ---    0.42526   0.45321   0.45399   0.45745   0.52047
     Eigenvalues ---    0.55473   0.55473   0.55473   0.55473   0.66833
     Eigenvalues ---    0.80209
 RFO step:  Lambda=-5.83817335D-02 EMin= 2.36824181D-03
 Linear search not attempted -- first point.
 Maximum step size (   0.300) exceeded in Quadratic search.
    -- Step size scaled by   0.848
 Iteration  1 RMS(Cart)=  0.05206844 RMS(Int)=  0.00099759
 Iteration  2 RMS(Cart)=  0.00125663 RMS(Int)=  0.00006161
 Iteration  3 RMS(Cart)=  0.00000187 RMS(Int)=  0.00006160
 Iteration  4 RMS(Cart)=  0.00000000 RMS(Int)=  0.00006160
 ITry= 1 IFail=0 DXMaxC= 1.83D-01 DCOld= 1.00D+10 DXMaxT= 3.00D-01 DXLimC= 3.00D+00 Rises=F
 Variable       Old X    -DE/DX   Delta X   Delta X   Delta X     New X
                                 (Linear)    (Quad)   (Total)
    R1        2.56686   0.01159   0.00000   0.01827   0.01828   2.58514
    R2        2.65125   0.02304   0.00000   0.03974   0.03971   2.69097
    R3        2.70231  -0.07365   0.00000  -0.13339  -0.13339   2.56892
    R4        2.65125  -0.00671   0.00000  -0.01065  -0.01060   2.64065
    R5        2.02201   0.00972   0.00000   0.01914   0.01914   2.04114
    R6        2.64535   0.02136   0.00000   0.03382   0.03385   2.67920
    R7        2.91018  -0.01704   0.00000  -0.04207  -0.04207   2.86810
    R8        2.64236  -0.03362   0.00000  -0.05698  -0.05699   2.58536
    R9        2.02201   0.00883   0.00000   0.01739   0.01739   2.03939
   R10        2.64535   0.00989   0.00000   0.01580   0.01575   2.66110
   R11        2.70231  -0.05175   0.00000  -0.09373  -0.09373   2.60858
   R12        2.70231  -0.09387   0.00000  -0.17001  -0.17001   2.53229
   R13        2.45910   0.00593   0.00000   0.00692   0.00692   2.46602
   R14        2.37803  -0.07113   0.00000  -0.07010  -0.07010   2.30793
   R15        1.81414   0.00709   0.00000   0.00981   0.00981   1.82395
   R16        1.81414   0.01331   0.00000   0.01841   0.01841   1.83255
   R17        3.87794   0.00965   0.00000   0.04474   0.04474   3.92268
   R18        1.81414   0.01660   0.00000   0.02296   0.02296   1.83710
   R19        1.81414   0.01097   0.00000   0.01518   0.01518   1.82932
    A1        2.10197  -0.00267   0.00000  -0.00132  -0.00134   2.10063
    A2        2.09061   0.02059   0.00000   0.05361   0.05361   2.14422
    A3        2.09061  -0.01792   0.00000  -0.05229  -0.05228   2.03832
    A4        2.10197  -0.01017   0.00000  -0.02592  -0.02586   2.07611
    A5        2.09061   0.00475   0.00000   0.01169   0.01166   2.10226
    A6        2.09061   0.00541   0.00000   0.01424   0.01420   2.10481
    A7        2.09441   0.00982   0.00000   0.02598   0.02605   2.12047
    A8        2.09439  -0.02029   0.00000  -0.05530  -0.05534   2.03905
    A9        2.09439   0.01047   0.00000   0.02931   0.02927   2.12365
   A10        2.08680   0.00094   0.00000  -0.00281  -0.00279   2.08401
   A11        2.09819   0.00754   0.00000   0.03250   0.03249   2.13068
   A12        2.09819  -0.00848   0.00000  -0.02969  -0.02970   2.06849
   A13        2.08680   0.00285   0.00000   0.00421   0.00413   2.09094
   A14        2.09819  -0.00251   0.00000  -0.00509  -0.00508   2.09311
   A15        2.09819  -0.00034   0.00000   0.00088   0.00089   2.09908
   A16        2.09441  -0.00077   0.00000  -0.00015  -0.00024   2.09417
   A17        2.09439   0.00622   0.00000   0.01612   0.01614   2.11053
   A18        2.09439  -0.00545   0.00000  -0.01598  -0.01595   2.07844
   A19        2.09440   0.00720   0.00000   0.01980   0.01980   2.11420
   A20        2.09440  -0.00721   0.00000  -0.01983  -0.01983   2.07456
   A21        2.09440   0.00001   0.00000   0.00003   0.00003   2.09443
   A22        2.09440  -0.00726   0.00000  -0.02820  -0.02820   2.06619
   A23        1.91063   0.00755   0.00000   0.02806   0.02805   1.93869
   A24        2.22502  -0.00729   0.00000  -0.02091  -0.02092   2.20410
   A25        2.06727  -0.00002   0.00000  -0.00145  -0.00146   2.06581
   A26        1.91063  -0.00255   0.00000  -0.00991  -0.00991   1.90072
   A27        1.91063  -0.00536   0.00000  -0.02082  -0.02082   1.88981
    D1       -0.00000  -0.00007   0.00000  -0.00090  -0.00082  -0.00083
    D2        3.14159  -0.00022   0.00000  -0.00233  -0.00230   3.13929
    D3        3.14159   0.00039   0.00000   0.00402   0.00423  -3.13737
    D4       -0.00000   0.00025   0.00000   0.00259   0.00275   0.00275
    D5        0.00000  -0.00053   0.00000  -0.00586  -0.00586  -0.00585
    D6       -3.14159   0.00042   0.00000   0.00452   0.00458  -3.13701
    D7       -3.14159  -0.00099   0.00000  -0.01078  -0.01061   3.13099
    D8        0.00000  -0.00005   0.00000  -0.00040  -0.00017  -0.00017
    D9       -0.52360   0.00347   0.00000   0.04158   0.04159  -0.48201
   D10        2.61799   0.00393   0.00000   0.04647   0.04647   2.66446
   D11        0.00000   0.00032   0.00000   0.00369   0.00371   0.00371
   D12       -3.14159  -0.00021   0.00000  -0.00246  -0.00237   3.13922
   D13       -3.14159   0.00046   0.00000   0.00513   0.00519  -3.13641
   D14       -0.00000  -0.00007   0.00000  -0.00102  -0.00089  -0.00089
   D15        0.00000   0.00004   0.00000   0.00028   0.00021   0.00021
   D16        3.14159  -0.00006   0.00000  -0.00080  -0.00089   3.14070
   D17       -3.14159   0.00057   0.00000   0.00644   0.00658  -3.13501
   D18       -0.00000   0.00047   0.00000   0.00536   0.00548   0.00548
   D19       -3.14159   0.00047   0.00000   0.00588   0.00585  -3.13574
   D20        0.00000   0.00040   0.00000   0.00507   0.00504   0.00504
   D21        0.00000  -0.00006   0.00000  -0.00027  -0.00024  -0.00024
   D22        3.14159  -0.00013   0.00000  -0.00108  -0.00105   3.14054
   D23       -0.00000  -0.00064   0.00000  -0.00694  -0.00693  -0.00693
   D24        3.14159   0.00041   0.00000   0.00458   0.00461  -3.13698
   D25       -3.14159  -0.00054   0.00000  -0.00586  -0.00586   3.13573
   D26        0.00000   0.00051   0.00000   0.00565   0.00568   0.00568
   D27       -0.00000   0.00088   0.00000   0.00975   0.00978   0.00977
   D28        3.14159  -0.00006   0.00000  -0.00063  -0.00047   3.14112
   D29        3.14159  -0.00016   0.00000  -0.00177  -0.00181   3.13979
   D30       -0.00000  -0.00111   0.00000  -0.01215  -0.01205  -0.01205
   D31       -2.61799  -0.00204   0.00000  -0.02451  -0.02451  -2.64251
   D32        0.09085  -0.00078   0.00000  -0.00811  -0.00811   0.08274
   D33        0.52360  -0.00099   0.00000  -0.01292  -0.01292   0.51068
   D34       -3.05074   0.00027   0.00000   0.00348   0.00348  -3.04726
   D35       -0.52360   0.00668   0.00000   0.07982   0.07984  -0.44376
   D36        2.61799   0.00762   0.00000   0.09020   0.09018   2.70817
   D37        0.00000   0.00010   0.00000   0.00091   0.00090   0.00090
   D38       -3.14159   0.00017   0.00000   0.00172   0.00172  -3.13987
         Item               Value     Threshold  Converged?
 Maximum Force            0.093873     0.000450     NO 
 RMS     Force            0.018181     0.000300     NO 
 Maximum Displacement     0.183383     0.001800     NO 
 RMS     Displacement     0.052144     0.001200     NO 
 Predicted change in Energy=-3.172244D-02
 Lowest energy point so far.  Saving SCF results.
 GradGradGradGradGradGradGradGradGradGradGradGradGradGradGradGradGradGrad

 Leave Link  103 at Sat May 27 00:48:17 2023, MaxMem=  2684354560 cpu:               0.3 elap:               0.1
 (Enter /home/xut/apps/g16/l202.exe)
                          Input orientation:                          
 ---------------------------------------------------------------------
 Center     Atomic      Atomic             Coordinates (Angstroms)
 Number     Number       Type             X           Y           Z
 ---------------------------------------------------------------------
      1          6           0       -1.584368    1.689688    0.060373
      2          6           0       -2.191741    0.464003    0.074984
      3          6           0       -1.396479   -0.684976    0.082564
      4          6           0        0.019086   -0.605984    0.079936
      5          6           0        0.623340    0.621418    0.070005
      6          6           0       -0.163847    1.788933    0.054059
      7          1           0       -3.269097    0.386991    0.081935
      8          1           0        0.642303   -1.487023    0.086550
      9          6           0       -2.120245   -2.018882    0.101957
     10          8           0       -1.460207   -3.144516    0.116688
     11          1           0       -0.495604   -3.110844    0.115749
     12          8           0       -3.341519   -2.026995    0.104511
     13          8           0        2.000820    0.710831    0.061836
     14          1           0        2.299782    1.528537    0.488894
     15          8           0        0.442983    2.983656    0.045030
     16          1           0       -0.156575    3.638450   -0.351015
     17          8           0       -2.280138    2.857551    0.056987
     18          1           0       -3.138716    2.698230   -0.360799
     19         24           0        3.333978   -0.874342   -0.075426
 ---------------------------------------------------------------------
                    Distance matrix (angstroms):
                    1          2          3          4          5
     1  C    0.000000
     2  C    1.367999   0.000000
     3  C    2.382189   1.397373   0.000000
     4  C    2.800278   2.456145   1.417769   0.000000
     5  C    2.452604   2.819483   2.405513   1.368115   0.000000
     6  C    1.423997   2.422443   2.764131   2.402033   1.408194
     7  H    2.129741   1.080127   2.157733   3.434843   3.899508
     8  H    3.879464   3.440703   2.190874   1.079200   2.108591
     9  C    3.747318   2.484061   1.517735   2.563884   3.807817
    10  O    4.836127   3.682158   2.460602   2.938333   4.304138
    11  H    4.922762   3.957028   2.587955   2.557442   3.896654
    12  O    4.111358   2.743708   2.363192   3.648772   4.768164
    13  O    3.716414   4.199840   3.672920   2.379411   1.380403
    14  H    3.911038   4.634472   4.327480   3.150397   1.951612
    15  O    2.405149   3.645726   4.104131   3.614751   2.369245
    16  H    2.450612   3.794797   4.518557   4.269870   3.144520
    17  O    1.359416   2.395248   3.651165   4.157287   3.664784
    18  H    1.900143   2.465450   3.831194   4.591710   4.318774
    19  Cr   5.548227   5.687474   4.736881   3.329364   3.099356
                    6          7          8          9         10
     6  C    0.000000
     7  H    3.407168   0.000000
     8  H    3.373844   4.337165   0.000000
     9  C    4.281267   2.666175   2.813323   0.000000
    10  O    5.101313   3.967976   2.677450   1.304960   0.000000
    11  H    4.911383   4.464107   1.983048   1.957557   0.965190
    12  O    4.966030   2.415178   4.020290   1.221303   2.188227
    13  O    2.418294   5.279895   2.583939   4.943290   5.181256
    14  H    2.515224   5.699223   3.464494   5.680716   6.009448
    15  O    1.340033   4.530294   4.475313   5.621278   6.417302
    16  H    1.893370   4.521860   5.205779   6.005546   6.922920
    17  O    2.370789   2.661264   5.236111   4.879261   6.058107
    18  H    3.138276   2.356870   5.657966   4.847946   6.097793
    19  Cr   4.398248   6.724308   2.765272   5.575840   5.307995
                   11         12         13         14         15
    11  H    0.000000
    12  O    3.045338   0.000000
    13  O    4.565111   6.003173   0.000000
    14  H    5.429298   6.679358   0.969742   0.000000
    15  O    6.166756   6.279540   2.755517   2.400435   0.000000
    16  H    6.773904   6.515261   3.660021   3.345276   0.972150
    17  O    6.229747   4.998758   4.789053   4.788370   2.726066
    18  H    6.399882   4.752410   5.526591   5.627382   3.615901
    19  Cr   4.438940   6.776669   2.075795   2.676163   4.822501
                   16         17         18         19
    16  H    0.000000
    17  O    2.299084   0.000000
    18  H    3.126863   0.968032   0.000000
    19  Cr   5.711848   6.742615   7.398682   0.000000
 Stoichiometry    C7H6CrO5(3+,4)
 Framework group  C1[X(C7H6CrO5)]
 Deg. of freedom    51
 Full point group                 C1      NOp   1
 RotChk:  IX=0 Diff= 2.63D-02
 Largest Abelian subgroup         C1      NOp   1
 Largest concise Abelian subgroup C1      NOp   1
                         Standard orientation:                         
 ---------------------------------------------------------------------
 Center     Atomic      Atomic             Coordinates (Angstroms)
 Number     Number       Type             X           Y           Z
 ---------------------------------------------------------------------
      1          6           0        1.615728    1.630638   -0.000558
      2          6           0        2.186003    0.387188    0.005793
      3          6           0        1.356739   -0.737413   -0.009778
      4          6           0       -0.055565   -0.615927   -0.036381
      5          6           0       -0.622579    0.629108   -0.047359
      6          6           0        0.199008    1.772544   -0.023719
      7          1           0        3.260467    0.277806    0.021209
      8          1           0       -0.704831   -1.477878   -0.049393
      9          6           0        2.040162   -2.092563   -0.005086
     10          8           0        1.346879   -3.197947   -0.025232
     11          1           0        0.383907   -3.135315   -0.044069
     12          8           0        3.260440   -2.137369    0.017155
     13          8           0       -1.996619    0.759908   -0.067724
     14          1           0       -2.262151    1.582925   -0.506515
     15          8           0       -0.371548    2.984986   -0.035421
     16          1           0        0.239445    3.624497    0.368051
     17          8           0        2.346220    2.777070    0.008671
     18          1           0        3.191057    2.595245    0.444877
     19         24           0       -3.379494   -0.783413    0.053699
 ---------------------------------------------------------------------
 Rotational constants (GHZ):           0.7030573           0.4438750           0.2723528
 Leave Link  202 at Sat May 27 00:48:17 2023, MaxMem=  2684354560 cpu:               0.1 elap:               0.0
 (Enter /home/xut/apps/g16/l301.exe)
 Basis read from rwf:  (5D, 7F)
 Pseudo-potential data read from rwf file.
 There are   342 symmetry adapted cartesian basis functions of A   symmetry.
 There are   328 symmetry adapted basis functions of A   symmetry.
   328 basis functions,   538 primitive gaussians,   342 cartesian basis functions
    51 alpha electrons       48 beta electrons
       nuclear repulsion energy       839.6363601126 Hartrees.
 IExCor= 4336 DFT=T Ex+Corr=M062X ExCW=0 ScaHFX=  0.540000
 ScaDFX=  1.000000  1.000000  1.000000  1.000000 ScalE2=  1.000000  1.000000
 IRadAn=      5 IRanWt=     -1 IRanGd=            0 ICorTp=0 IEmpDi=  4
 NAtoms=   19 NActive=   19 NUniq=   19 SFac= 1.00D+00 NAtFMM=   60 NAOKFM=F Big=F
 Integral buffers will be    131072 words long.
 Raffenetti 2 integral format.
 Two-electron integral symmetry is turned on.
 No density basis found on file   724.
 ------------------------------------------------------------------------------
 Polarizable Continuum Model (PCM)
 =================================
 Model                : PCM.
 Atomic radii         : SMD-Coulomb.
 Polarization charges : Total charges.
 Charge compensation  : None.
 Solution method      : On-the-fly selection.
 Cavity type          : VdW (van der Waals Surface) (Alpha=1.000).
 Cavity algorithm     : GePol (No added spheres)
                        Default sphere list used, NSphG=   19.
                        Lebedev-Laikov grids with approx.  5.0 points / Ang**2.
                        Smoothing algorithm: York/Karplus (Gamma=1.0000).
                        Polarization charges: spherical gaussians, with
                                              point-specific exponents (IZeta= 3).
                        Self-potential: point-specific (ISelfS= 7).
                        Self-field    : sphere-specific E.n sum rule (ISelfD= 2).
 1st derivatives      : Analytical E(r).r(x)/FMM algorithm (CHGder, D1EAlg=3).
                        Cavity 1st derivative terms included.
 Solvent              : Water, Eps=  78.355300 Eps(inf)=   1.777849
 ------------------------------------------------------------------------------
 Spheres list:
 ISph  on   Nord     Re0    Alpha      Xe            Ye            Ze
    1   C      1    1.8500  1.000      1.615728      1.630638     -0.000558
    2   C      2    1.8500  1.000      2.186003      0.387188      0.005793
    3   C      3    1.8500  1.000      1.356739     -0.737413     -0.009778
    4   C      4    1.8500  1.000     -0.055565     -0.615927     -0.036381
    5   C      5    1.8500  1.000     -0.622579      0.629108     -0.047359
    6   C      6    1.8500  1.000      0.199008      1.772544     -0.023719
    7   H      7    1.2000  1.000      3.260467      0.277806      0.021209
    8   H      8    1.2000  1.000     -0.704831     -1.477878     -0.049393
    9   C      9    1.8500  1.000      2.040162     -2.092563     -0.005086
   10   O     10    1.5200  1.000      1.346879     -3.197947     -0.025232
   11   H     11    1.2000  1.000      0.383907     -3.135315     -0.044069
   12   O     12    1.5200  1.000      3.260440     -2.137369      0.017155
   13   O     13    1.5200  1.000     -1.996619      0.759908     -0.067724
   14   H     14    1.2000  1.000     -2.262151      1.582925     -0.506515
   15   O     15    1.5200  1.000     -0.371548      2.984986     -0.035421
   16   H     16    1.2000  1.000      0.239445      3.624497      0.368051
   17   O     17    1.5200  1.000      2.346220      2.777070      0.008671
   18   H     18    1.2000  1.000      3.191057      2.595245      0.444877
   19  Cr     19    1.5115  1.000     -3.379494     -0.783413      0.053699
 ------------------------------------------------------------------------------
 GePol: Number of generator spheres                  =      19
 GePol: Total number of spheres                      =      19
 GePol: Number of exposed spheres                    =      19 (100.00%)
 GePol: Number of points                             =    1462
 GePol: Average weight of points                     =       0.13
 GePol: Minimum weight of points                     =   0.19D-10
 GePol: Maximum weight of points                     =    0.21991
 GePol: Number of points with low weight             =      66
 GePol: Fraction of low-weight points (<1% of avg)   =       4.51%
 GePol: Cavity surface area                          =    188.923 Ang**2
 GePol: Cavity volume                                =    155.765 Ang**3
 ------------------------------------------------------------------------------
 Atomic radii for non-electrostatic terms: SMD-CDS.
 ------------------------------------------------------------------------------
 PCM non-electrostatic energy =         0.0101885832 Hartrees.
 Nuclear repulsion after PCM non-electrostatic terms =      839.6465486959 Hartrees.
 Leave Link  301 at Sat May 27 00:48:17 2023, MaxMem=  2684354560 cpu:               0.5 elap:               0.1
 (Enter /home/xut/apps/g16/l302.exe)
 NPDir=0 NMtPBC=     1 NCelOv=     1 NCel=       1 NClECP=     1 NCelD=      1
         NCelK=      1 NCelE2=     1 NClLst=     1 CellRange=     0.0.
 One-electron integrals computed using PRISM.
 One-electron integral symmetry used in STVInt
   1 Symmetry operations used in ECPInt.
 ECPInt:  NShTT=    6105 NPrTT=   23469 LenC2=    5810 LenP2D=   15877.
 LDataN:  DoStor=T MaxTD1= 4 Len=   56
 NBasis=   328 RedAO= T EigKep=  1.33D-06  NBF=   328
 NBsUse=   327 1.00D-06 EigRej=  7.30D-07 NBFU=   327
 Precomputing XC quadrature grid using
 IXCGrd= 4 IRadAn=           5 IRanWt=          -1 IRanGd=           0 AccXCQ= 0.00D+00.
 Generated NRdTot=       0 NPtTot=           0 NUsed=           0 NTot=          32
 NSgBfM=   342   342   342   342   342 MxSgAt=    19 MxSgA2=    19.
 Leave Link  302 at Sat May 27 00:48:17 2023, MaxMem=  2684354560 cpu:               2.3 elap:               0.2
 (Enter /home/xut/apps/g16/l303.exe)
 DipDrv:  MaxL=1.
 Leave Link  303 at Sat May 27 00:48:17 2023, MaxMem=  2684354560 cpu:               0.3 elap:               0.0
 (Enter /home/xut/apps/g16/l401.exe)
 Initial guess from the checkpoint file:  "149-91-7-meta13-Cr.chk"
 B after Tr=    -0.000000    0.000000   -0.000000
         Rot=    0.999980   -0.000182   -0.000051    0.006273 Ang=  -0.72 deg.
 Guess basis will be translated and rotated to current coordinates.
 JPrj=2 DoOrth=T DoCkMO=T.
 Initial guess <Sx>= 0.0000 <Sy>= 0.0000 <Sz>= 1.5000 <S**2>= 4.7669 S= 1.7398
 Generating alternative initial guess.
 ExpMin= 1.90D-02 ExpMax= 8.59D+03 ExpMxC= 1.30D+03 IAcc=3 IRadAn=         5 AccDes= 0.00D+00
 Harris functional with IExCor= 1009 and IRadAn=       5 diagonalized for initial guess.
 HarFok:  IExCor= 1009 AccDes= 0.00D+00 IRadAn=         5 IDoV= 1 UseB2=F ITyADJ=14
 ICtDFT=  3500011 ScaDFX=  1.000000  1.000000  1.000000  1.000000
 FoFCou: FMM=F IPFlag=           0 FMFlag=      100000 FMFlg1=           0
         NFxFlg=           0 DoJE=T BraDBF=F KetDBF=T FulRan=T
         wScrn=  0.000000 ICntrl=       500 IOpCl=  0 I1Cent=   200000004 NGrid=           0
         NMat0=    1 NMatS0=      1 NMatT0=    0 NMatD0=    1 NMtDS0=    0 NMtDT0=    0
 Petite list used in FoFCou.
 Harris En= -732.145276899861    
 Leave Link  401 at Sat May 27 00:48:18 2023, MaxMem=  2684354560 cpu:               9.8 elap:               1.0
 (Enter /home/xut/apps/g16/l502.exe)
 Integral symmetry usage will be decided dynamically.
 UHF open shell SCF:
 Using DIIS extrapolation, IDIIS=  1040.
 NGot=  2684354560 LenX=  2684113999 LenY=  2683996594
 Requested convergence on RMS density matrix=1.00D-06 within 128 cycles.
 Requested convergence on MAX density matrix=1.00D-04.
 Requested convergence on             energy=1.00D-04.
 No special actions if energy rises.
 Fock matrices will be formed incrementally for  20 cycles.

 Cycle   1  Pass 1  IDiag  1:
 FoFJK:  IHMeth= 1 ICntrl=       0 DoSepK=F KAlg= 0 I1Cent=           0 FoldK=F
 IRaf= 910000000 NMat=       1 IRICut=       1 DoRegI=T DoRafI=F ISym2E= 0 IDoP0=0 IntGTp=1.
 FoFCou: FMM=F IPFlag=           0 FMFlag=      100000 FMFlg1=           0
         NFxFlg=           0 DoJE=F BraDBF=F KetDBF=F FulRan=T
         wScrn=  0.000000 ICntrl=         0 IOpCl=  1 I1Cent=           0 NGrid=           0
         NMat0=    1 NMatS0=      1 NMatT0=    0 NMatD0=    1 NMtDS0=    0 NMtDT0=    0
 Symmetry not used in FoFCou.
 Inv3:  Mode=1 IEnd=     6412332.
 Iteration    1 A*A^-1 deviation from unit magnitude is 3.11D-15 for    756.
 Iteration    1 A*A^-1 deviation from orthogonality  is 1.89D-15 for   1247    242.
 Iteration    1 A^-1*A deviation from unit magnitude is 2.66D-15 for     52.
 Iteration    1 A^-1*A deviation from orthogonality  is 2.22D-15 for    776     40.
 E= -732.261882494798    
 DIIS: error= 4.18D-03 at cycle   1 NSaved=   1.
 NSaved= 1 IEnMin= 1 EnMin= -732.261882494798     IErMin= 1 ErrMin= 4.18D-03
 ErrMax= 4.18D-03  0.00D+00 EMaxC= 1.00D-01 BMatC= 7.02D-02 BMatP= 7.02D-02
 IDIUse=3 WtCom= 9.58D-01 WtEn= 4.18D-02
 Coeff-Com:  0.100D+01
 Coeff-En:   0.100D+01
 Coeff:      0.100D+01
 Gap=     0.470 Goal=   None    Shift=    0.000
 Gap=     0.475 Goal=   None    Shift=    0.000
 GapD=    0.470 DampG=2.000 DampE=1.000 DampFc=2.0000 IDamp=-1.
 RMSDP=1.21D-02 MaxDP=1.07D+00              OVMax= 4.07D-02

 Cycle   2  Pass 1  IDiag  1:
 RMSU=  1.19D-02    CP:  9.77D-01
 E= -732.284960978383     Delta-E=       -0.023078483585 Rises=F Damp=F
 DIIS: error= 1.37D-03 at cycle   2 NSaved=   2.
 NSaved= 2 IEnMin= 2 EnMin= -732.284960978383     IErMin= 2 ErrMin= 1.37D-03
 ErrMax= 1.37D-03  0.00D+00 EMaxC= 1.00D-01 BMatC= 4.02D-03 BMatP= 7.02D-02
 IDIUse=3 WtCom= 9.86D-01 WtEn= 1.37D-02
 Coeff-Com:  0.248D-01 0.975D+00
 Coeff-En:   0.000D+00 0.100D+01
 Coeff:      0.244D-01 0.976D+00
 Gap=     0.148 Goal=   None    Shift=    0.000
 Gap=     0.278 Goal=   None    Shift=    0.000
 RMSDP=2.26D-03 MaxDP=2.52D-01 DE=-2.31D-02 OVMax= 1.53D-02

 Cycle   3  Pass 1  IDiag  1:
 RMSU=  1.87D-03    CP:  9.82D-01  1.10D+00
 E= -732.285504900464     Delta-E=       -0.000543922081 Rises=F Damp=F
 DIIS: error= 1.25D-03 at cycle   3 NSaved=   3.
 NSaved= 3 IEnMin= 3 EnMin= -732.285504900464     IErMin= 3 ErrMin= 1.25D-03
 ErrMax= 1.25D-03  0.00D+00 EMaxC= 1.00D-01 BMatC= 3.47D-03 BMatP= 4.02D-03
 IDIUse=3 WtCom= 9.87D-01 WtEn= 1.25D-02
 Coeff-Com: -0.431D-01 0.493D+00 0.550D+00
 Coeff-En:   0.000D+00 0.242D+00 0.758D+00
 Coeff:     -0.425D-01 0.490D+00 0.553D+00
 Gap=     0.147 Goal=   None    Shift=    0.000
 Gap=     0.278 Goal=   None    Shift=    0.000
 RMSDP=1.10D-03 MaxDP=2.17D-01 DE=-5.44D-04 OVMax= 9.48D-03

 Cycle   4  Pass 1  IDiag  1:
 RMSU=  7.94D-04    CP:  9.77D-01  1.06D+00  8.05D-01
 E= -732.286138920402     Delta-E=       -0.000634019938 Rises=F Damp=F
 DIIS: error= 3.18D-04 at cycle   4 NSaved=   4.
 NSaved= 4 IEnMin= 4 EnMin= -732.286138920402     IErMin= 4 ErrMin= 3.18D-04
 ErrMax= 3.18D-04  0.00D+00 EMaxC= 1.00D-01 BMatC= 1.27D-04 BMatP= 3.47D-03
 IDIUse=3 WtCom= 9.97D-01 WtEn= 3.18D-03
 Coeff-Com: -0.142D-01 0.697D-01 0.181D+00 0.763D+00
 Coeff-En:   0.000D+00 0.000D+00 0.000D+00 0.100D+01
 Coeff:     -0.142D-01 0.695D-01 0.181D+00 0.764D+00
 Gap=     0.147 Goal=   None    Shift=    0.000
 Gap=     0.278 Goal=   None    Shift=    0.000
 RMSDP=2.37D-04 MaxDP=1.55D-02 DE=-6.34D-04 OVMax= 5.05D-03

 Cycle   5  Pass 1  IDiag  1:
 RMSU=  1.62D-04    CP:  9.77D-01  1.06D+00  8.28D-01  1.17D+00
 E= -732.286183005350     Delta-E=       -0.000044084948 Rises=F Damp=F
 DIIS: error= 1.18D-04 at cycle   5 NSaved=   5.
 NSaved= 5 IEnMin= 5 EnMin= -732.286183005350     IErMin= 5 ErrMin= 1.18D-04
 ErrMax= 1.18D-04  0.00D+00 EMaxC= 1.00D-01 BMatC= 2.07D-05 BMatP= 1.27D-04
 IDIUse=3 WtCom= 9.99D-01 WtEn= 1.18D-03
 Coeff-Com:  0.257D-04-0.282D-01-0.383D-02 0.272D+00 0.760D+00
 Coeff-En:   0.000D+00 0.000D+00 0.000D+00 0.000D+00 0.100D+01
 Coeff:      0.257D-04-0.282D-01-0.382D-02 0.271D+00 0.761D+00
 Gap=     0.147 Goal=   None    Shift=    0.000
 Gap=     0.278 Goal=   None    Shift=    0.000
 RMSDP=9.39D-05 MaxDP=7.18D-03 DE=-4.41D-05 OVMax= 4.17D-03

 Cycle   6  Pass 1  IDiag  1:
 RMSU=  6.83D-05    CP:  9.77D-01  1.06D+00  8.45D-01  1.20D+00  1.26D+00
 E= -732.286197821606     Delta-E=       -0.000014816256 Rises=F Damp=F
 DIIS: error= 1.12D-04 at cycle   6 NSaved=   6.
 NSaved= 6 IEnMin= 6 EnMin= -732.286197821606     IErMin= 6 ErrMin= 1.12D-04
 ErrMax= 1.12D-04  0.00D+00 EMaxC= 1.00D-01 BMatC= 4.82D-06 BMatP= 2.07D-05
 IDIUse=3 WtCom= 9.99D-01 WtEn= 1.12D-03
 Coeff-Com:  0.225D-02-0.240D-01-0.305D-01 0.432D-02 0.244D+00 0.804D+00
 Coeff-En:   0.000D+00 0.000D+00 0.000D+00 0.000D+00 0.000D+00 0.100D+01
 Coeff:      0.225D-02-0.240D-01-0.304D-01 0.431D-02 0.244D+00 0.804D+00
 Gap=     0.147 Goal=   None    Shift=    0.000
 Gap=     0.279 Goal=   None    Shift=    0.000
 RMSDP=6.71D-05 MaxDP=7.39D-03 DE=-1.48D-05 OVMax= 4.52D-03

 Cycle   7  Pass 1  IDiag  1:
 RMSU=  3.11D-05    CP:  9.77D-01  1.06D+00  8.37D-01  1.23D+00  1.47D+00
                    CP:  1.50D+00
 E= -732.286207174117     Delta-E=       -0.000009352511 Rises=F Damp=F
 DIIS: error= 9.50D-05 at cycle   7 NSaved=   7.
 NSaved= 7 IEnMin= 7 EnMin= -732.286207174117     IErMin= 7 ErrMin= 9.50D-05
 ErrMax= 9.50D-05  0.00D+00 EMaxC= 1.00D-01 BMatC= 3.12D-06 BMatP= 4.82D-06
 IDIUse=1 WtCom= 1.00D+00 WtEn= 0.00D+00
 Coeff-Com:  0.382D-03 0.415D-02-0.223D-02-0.822D-01-0.267D+00 0.335D+00
 Coeff-Com:  0.101D+01
 Coeff:      0.382D-03 0.415D-02-0.223D-02-0.822D-01-0.267D+00 0.335D+00
 Coeff:      0.101D+01
 Gap=     0.147 Goal=   None    Shift=    0.000
 Gap=     0.279 Goal=   None    Shift=    0.000
 RMSDP=6.54D-05 MaxDP=7.86D-03 DE=-9.35D-06 OVMax= 5.78D-03

 Cycle   8  Pass 1  IDiag  1:
 RMSU=  1.95D-05    CP:  9.77D-01  1.05D+00  8.35D-01  1.25D+00  1.68D+00
                    CP:  2.09D+00  1.90D+00
 E= -732.286216877073     Delta-E=       -0.000009702956 Rises=F Damp=F
 DIIS: error= 7.75D-05 at cycle   8 NSaved=   8.
 NSaved= 8 IEnMin= 8 EnMin= -732.286216877073     IErMin= 8 ErrMin= 7.75D-05
 ErrMax= 7.75D-05  0.00D+00 EMaxC= 1.00D-01 BMatC= 1.78D-06 BMatP= 3.12D-06
 IDIUse=1 WtCom= 1.00D+00 WtEn= 0.00D+00
 Coeff-Com: -0.885D-03 0.133D-01 0.172D-01-0.364D-01-0.281D+00-0.911D-01
 Coeff-Com:  0.288D+00 0.109D+01
 Coeff:     -0.885D-03 0.133D-01 0.172D-01-0.364D-01-0.281D+00-0.911D-01
 Coeff:      0.288D+00 0.109D+01
 Gap=     0.147 Goal=   None    Shift=    0.000
 Gap=     0.279 Goal=   None    Shift=    0.000
 RMSDP=6.44D-05 MaxDP=8.13D-03 DE=-9.70D-06 OVMax= 6.30D-03

 Cycle   9  Pass 1  IDiag  1:
 RMSU=  1.12D-05    CP:  9.77D-01  1.05D+00  8.32D-01  1.26D+00  1.86D+00
                    CP:  2.64D+00  2.81D+00  2.45D+00
 E= -732.286225160024     Delta-E=       -0.000008282951 Rises=F Damp=F
 DIIS: error= 7.07D-05 at cycle   9 NSaved=   9.
 NSaved= 9 IEnMin= 9 EnMin= -732.286225160024     IErMin= 9 ErrMin= 7.07D-05
 ErrMax= 7.07D-05  0.00D+00 EMaxC= 1.00D-01 BMatC= 1.06D-06 BMatP= 1.78D-06
 IDIUse=1 WtCom= 1.00D+00 WtEn= 0.00D+00
 Coeff-Com: -0.643D-03 0.269D-02 0.126D-01 0.296D-01 0.984D-02-0.103D+00
 Coeff-Com: -0.624D+00 0.309D+00 0.136D+01
 Coeff:     -0.643D-03 0.269D-02 0.126D-01 0.296D-01 0.984D-02-0.103D+00
 Coeff:     -0.624D+00 0.309D+00 0.136D+01
 Gap=     0.147 Goal=   None    Shift=    0.000
 Gap=     0.279 Goal=   None    Shift=    0.000
 RMSDP=7.85D-05 MaxDP=9.92D-03 DE=-8.28D-06 OVMax= 8.08D-03

 Cycle  10  Pass 1  IDiag  1:
 RMSU=  4.72D-05    CP:  9.77D-01  1.05D+00  8.30D-01  1.27D+00  2.04D+00
                    CP:  3.00D+00  3.00D+00  3.00D+00  2.32D+00
 E= -732.286232953049     Delta-E=       -0.000007793025 Rises=F Damp=F
 DIIS: error= 4.27D-05 at cycle  10 NSaved=  10.
 NSaved=10 IEnMin=10 EnMin= -732.286232953049     IErMin=10 ErrMin= 4.27D-05
 ErrMax= 4.27D-05  0.00D+00 EMaxC= 1.00D-01 BMatC= 7.53D-07 BMatP= 1.06D-06
 IDIUse=1 WtCom= 1.00D+00 WtEn= 0.00D+00
 Coeff-Com:  0.671D-03-0.115D-01-0.789D-02 0.239D-01 0.206D+00 0.209D+00
 Coeff-Com: -0.450D+00-0.103D+01 0.602D+00 0.146D+01
 Coeff:      0.671D-03-0.115D-01-0.789D-02 0.239D-01 0.206D+00 0.209D+00
 Coeff:     -0.450D+00-0.103D+01 0.602D+00 0.146D+01
 Gap=     0.147 Goal=   None    Shift=    0.000
 Gap=     0.279 Goal=   None    Shift=    0.000
 RMSDP=8.84D-05 MaxDP=1.05D-02 DE=-7.79D-06 OVMax= 8.94D-03

 Cycle  11  Pass 1  IDiag  1:
 RMSU=  2.41D-05    CP:  9.77D-01  1.05D+00  8.30D-01  1.28D+00  2.23D+00
                    CP:  3.00D+00  3.00D+00  3.00D+00  3.00D+00  2.63D+00
 E= -732.286238620206     Delta-E=       -0.000005667157 Rises=F Damp=F
 DIIS: error= 2.34D-05 at cycle  11 NSaved=  11.
 NSaved=11 IEnMin=11 EnMin= -732.286238620206     IErMin=11 ErrMin= 2.34D-05
 ErrMax= 2.34D-05  0.00D+00 EMaxC= 1.00D-01 BMatC= 2.67D-07 BMatP= 7.53D-07
 IDIUse=1 WtCom= 1.00D+00 WtEn= 0.00D+00
 Coeff-Com:  0.429D-03-0.380D-02-0.568D-02-0.159D-01 0.215D-01 0.149D+00
 Coeff-Com:  0.158D+00-0.387D+00-0.390D+00 0.221D+00 0.125D+01
 Coeff:      0.429D-03-0.380D-02-0.568D-02-0.159D-01 0.215D-01 0.149D+00
 Coeff:      0.158D+00-0.387D+00-0.390D+00 0.221D+00 0.125D+01
 Gap=     0.147 Goal=   None    Shift=    0.000
 Gap=     0.280 Goal=   None    Shift=    0.000
 RMSDP=5.72D-05 MaxDP=6.11D-03 DE=-5.67D-06 OVMax= 4.87D-03

 Cycle  12  Pass 1  IDiag  1:
 RMSU=  3.02D-05    CP:  9.77D-01  1.05D+00  8.25D-01  1.30D+00  2.36D+00
                    CP:  3.00D+00  3.00D+00  3.00D+00  3.00D+00  3.00D+00
                    CP:  1.78D+00
 E= -732.286240481412     Delta-E=       -0.000001861206 Rises=F Damp=F
 DIIS: error= 1.46D-05 at cycle  12 NSaved=  12.
 NSaved=12 IEnMin=12 EnMin= -732.286240481412     IErMin=12 ErrMin= 1.46D-05
 ErrMax= 1.46D-05  0.00D+00 EMaxC= 1.00D-01 BMatC= 1.36D-07 BMatP= 2.67D-07
 IDIUse=1 WtCom= 1.00D+00 WtEn= 0.00D+00
 Coeff-Com: -0.183D-03 0.491D-02 0.259D-02-0.224D-01-0.112D+00-0.293D-01
 Coeff-Com:  0.325D+00 0.413D+00-0.538D+00-0.802D+00 0.664D+00 0.109D+01
 Coeff:     -0.183D-03 0.491D-02 0.259D-02-0.224D-01-0.112D+00-0.293D-01
 Coeff:      0.325D+00 0.413D+00-0.538D+00-0.802D+00 0.664D+00 0.109D+01
 Gap=     0.147 Goal=   None    Shift=    0.000
 Gap=     0.280 Goal=   None    Shift=    0.000
 RMSDP=4.98D-05 MaxDP=5.54D-03 DE=-1.86D-06 OVMax= 3.53D-03

 Cycle  13  Pass 1  IDiag  1:
 RMSU=  6.34D-06    CP:  9.77D-01  1.05D+00  8.20D-01  1.31D+00  2.46D+00
                    CP:  3.00D+00  3.00D+00  3.00D+00  3.00D+00  3.00D+00
                    CP:  2.50D+00  2.34D+00
 E= -732.286241291233     Delta-E=       -0.000000809821 Rises=F Damp=F
 DIIS: error= 9.03D-06 at cycle  13 NSaved=  13.
 NSaved=13 IEnMin=13 EnMin= -732.286241291233     IErMin=13 ErrMin= 9.03D-06
 ErrMax= 9.03D-06  0.00D+00 EMaxC= 1.00D-01 BMatC= 5.21D-08 BMatP= 1.36D-07
 IDIUse=1 WtCom= 1.00D+00 WtEn= 0.00D+00
 Coeff-Com: -0.150D-03 0.215D-02 0.226D-02-0.160D-02-0.305D-01-0.496D-01
 Coeff-Com:  0.244D-01 0.208D+00-0.199D-01-0.253D+00-0.176D+00 0.270D+00
 Coeff-Com:  0.102D+01
 Coeff:     -0.150D-03 0.215D-02 0.226D-02-0.160D-02-0.305D-01-0.496D-01
 Coeff:      0.244D-01 0.208D+00-0.199D-01-0.253D+00-0.176D+00 0.270D+00
 Coeff:      0.102D+01
 Gap=     0.147 Goal=   None    Shift=    0.000
 Gap=     0.280 Goal=   None    Shift=    0.000
 RMSDP=2.83D-05 MaxDP=3.47D-03 DE=-8.10D-07 OVMax= 1.14D-03

 Cycle  14  Pass 1  IDiag  1:
 RMSU=  4.62D-06    CP:  9.77D-01  1.05D+00  8.16D-01  1.32D+00  2.53D+00
                    CP:  3.00D+00  3.00D+00  3.00D+00  3.00D+00  3.00D+00
                    CP:  2.87D+00  3.00D+00  1.93D+00
 E= -732.286241508240     Delta-E=       -0.000000217007 Rises=F Damp=F
 DIIS: error= 8.11D-06 at cycle  14 NSaved=  14.
 NSaved=14 IEnMin=14 EnMin= -732.286241508240     IErMin=14 ErrMin= 8.11D-06
 ErrMax= 8.11D-06  0.00D+00 EMaxC= 1.00D-01 BMatC= 3.66D-08 BMatP= 5.21D-08
 IDIUse=1 WtCom= 1.00D+00 WtEn= 0.00D+00
 Coeff-Com:  0.147D-04-0.991D-03-0.896D-04 0.681D-02 0.294D-01-0.819D-02
 Coeff-Com: -0.945D-01-0.632D-01 0.156D+00 0.188D+00-0.272D+00-0.255D+00
 Coeff-Com:  0.294D+00 0.102D+01
 Coeff:      0.147D-04-0.991D-03-0.896D-04 0.681D-02 0.294D-01-0.819D-02
 Coeff:     -0.945D-01-0.632D-01 0.156D+00 0.188D+00-0.272D+00-0.255D+00
 Coeff:      0.294D+00 0.102D+01
 Gap=     0.147 Goal=   None    Shift=    0.000
 Gap=     0.280 Goal=   None    Shift=    0.000
 RMSDP=1.95D-05 MaxDP=2.56D-03 DE=-2.17D-07 OVMax= 4.92D-04

 Cycle  15  Pass 1  IDiag  1:
 RMSU=  1.18D-05    CP:  9.77D-01  1.05D+00  8.12D-01  1.32D+00  2.56D+00
                    CP:  3.00D+00  3.00D+00  3.00D+00  3.00D+00  3.00D+00
                    CP:  3.00D+00  3.00D+00  2.74D+00  2.28D+00
 E= -732.286241641187     Delta-E=       -0.000000132947 Rises=F Damp=F
 DIIS: error= 7.45D-06 at cycle  15 NSaved=  15.
 NSaved=15 IEnMin=15 EnMin= -732.286241641187     IErMin=15 ErrMin= 7.45D-06
 ErrMax= 7.45D-06  0.00D+00 EMaxC= 1.00D-01 BMatC= 2.97D-08 BMatP= 3.66D-08
 IDIUse=1 WtCom= 1.00D+00 WtEn= 0.00D+00
 Coeff-Com:  0.919D-04-0.126D-02-0.152D-02 0.194D-03 0.188D-01 0.238D-01
 Coeff-Com: -0.101D-01-0.120D+00-0.957D-02 0.175D+00 0.994D-01-0.175D+00
 Coeff-Com: -0.616D+00-0.513D-01 0.167D+01
 Coeff:      0.919D-04-0.126D-02-0.152D-02 0.194D-03 0.188D-01 0.238D-01
 Coeff:     -0.101D-01-0.120D+00-0.957D-02 0.175D+00 0.994D-01-0.175D+00
 Coeff:     -0.616D+00-0.513D-01 0.167D+01
 Gap=     0.147 Goal=   None    Shift=    0.000
 Gap=     0.280 Goal=   None    Shift=    0.000
 RMSDP=3.09D-05 MaxDP=4.38D-03 DE=-1.33D-07 OVMax= 8.13D-04

 Cycle  16  Pass 1  IDiag  1:
 RMSU=  1.03D-05    CP:  9.77D-01  1.05D+00  8.06D-01  1.33D+00  2.62D+00
                    CP:  3.00D+00  3.00D+00  3.00D+00  3.00D+00  3.00D+00
                    CP:  3.00D+00  3.00D+00  3.00D+00  3.00D+00  2.60D+00
 E= -732.286241838774     Delta-E=       -0.000000197587 Rises=F Damp=F
 DIIS: error= 6.44D-06 at cycle  16 NSaved=  16.
 NSaved=16 IEnMin=16 EnMin= -732.286241838774     IErMin=16 ErrMin= 6.44D-06
 ErrMax= 6.44D-06  0.00D+00 EMaxC= 1.00D-01 BMatC= 2.44D-08 BMatP= 2.97D-08
 IDIUse=1 WtCom= 1.00D+00 WtEn= 0.00D+00
 Coeff-Com:  0.533D-05 0.115D-02-0.494D-03-0.883D-02-0.353D-01 0.118D-01
 Coeff-Com:  0.146D+00 0.657D-01-0.262D+00-0.194D+00 0.421D+00 0.298D+00
 Coeff-Com: -0.514D+00-0.155D+01 0.567D+00 0.205D+01
 Coeff:      0.533D-05 0.115D-02-0.494D-03-0.883D-02-0.353D-01 0.118D-01
 Coeff:      0.146D+00 0.657D-01-0.262D+00-0.194D+00 0.421D+00 0.298D+00
 Coeff:     -0.514D+00-0.155D+01 0.567D+00 0.205D+01
 Gap=     0.147 Goal=   None    Shift=    0.000
 Gap=     0.280 Goal=   None    Shift=    0.000
 RMSDP=5.67D-05 MaxDP=8.12D-03 DE=-1.98D-07 OVMax= 1.53D-03

 Cycle  17  Pass 1  IDiag  1:
 RMSU=  2.98D-05    CP:  9.77D-01  1.05D+00  7.92D-01  1.35D+00  2.71D+00
                    CP:  3.00D+00  3.00D+00  3.00D+00  3.00D+00  3.00D+00
                    CP:  3.00D+00  3.00D+00  3.00D+00  3.00D+00  3.00D+00
                    CP:  3.00D+00
 E= -732.286242154621     Delta-E=       -0.000000315846 Rises=F Damp=F
 DIIS: error= 4.58D-06 at cycle  17 NSaved=  17.
 NSaved=17 IEnMin=17 EnMin= -732.286242154621     IErMin=17 ErrMin= 4.58D-06
 ErrMax= 4.58D-06  0.00D+00 EMaxC= 1.00D-01 BMatC= 1.54D-08 BMatP= 2.44D-08
 IDIUse=1 WtCom= 1.00D+00 WtEn= 0.00D+00
 Coeff-Com: -0.112D-03 0.239D-02 0.125D-02-0.585D-02-0.474D-01-0.318D-01
 Coeff-Com:  0.113D+00 0.203D+00-0.175D+00-0.327D+00 0.135D+00 0.382D+00
 Coeff-Com:  0.549D+00-0.104D+01-0.178D+01 0.140D+01 0.162D+01
 Coeff:     -0.112D-03 0.239D-02 0.125D-02-0.585D-02-0.474D-01-0.318D-01
 Coeff:      0.113D+00 0.203D+00-0.175D+00-0.327D+00 0.135D+00 0.382D+00
 Coeff:      0.549D+00-0.104D+01-0.178D+01 0.140D+01 0.162D+01
 Gap=     0.147 Goal=   None    Shift=    0.000
 Gap=     0.280 Goal=   None    Shift=    0.000
 RMSDP=8.45D-05 MaxDP=1.24D-02 DE=-3.16D-07 OVMax= 2.31D-03

 Cycle  18  Pass 1  IDiag  1:
 RMSU=  2.86D-05    CP:  9.76D-01  1.05D+00  7.73D-01  1.38D+00  2.85D+00
                    CP:  3.00D+00  3.00D+00  3.00D+00  3.00D+00  3.00D+00
                    CP:  3.00D+00  3.00D+00  3.00D+00  3.00D+00  3.00D+00
                    CP:  3.00D+00  2.91D+00
 E= -732.286242447770     Delta-E=       -0.000000293149 Rises=F Damp=F
 DIIS: error= 2.15D-06 at cycle  18 NSaved=  18.
 NSaved=18 IEnMin=18 EnMin= -732.286242447770     IErMin=18 ErrMin= 2.15D-06
 ErrMax= 2.15D-06  0.00D+00 EMaxC= 1.00D-01 BMatC= 4.57D-09 BMatP= 1.54D-08
 IDIUse=1 WtCom= 1.00D+00 WtEn= 0.00D+00
 Coeff-Com: -0.255D-05-0.359D-03-0.419D-04 0.411D-02 0.125D-01-0.902D-02
 Coeff-Com: -0.491D-01-0.140D-01 0.875D-01 0.705D-01-0.166D+00-0.116D+00
 Coeff-Com:  0.314D+00 0.525D+00-0.378D+00-0.787D+00 0.991D-01 0.141D+01
 Coeff:     -0.255D-05-0.359D-03-0.419D-04 0.411D-02 0.125D-01-0.902D-02
 Coeff:     -0.491D-01-0.140D-01 0.875D-01 0.705D-01-0.166D+00-0.116D+00
 Coeff:      0.314D+00 0.525D+00-0.378D+00-0.787D+00 0.991D-01 0.141D+01
 Gap=     0.147 Goal=   None    Shift=    0.000
 Gap=     0.280 Goal=   None    Shift=    0.000
 RMSDP=4.55D-05 MaxDP=6.87D-03 DE=-2.93D-07 OVMax= 1.24D-03

 Cycle  19  Pass 1  IDiag  1:
 RMSU=  2.77D-05    CP:  9.76D-01  1.05D+00  7.63D-01  1.39D+00  2.91D+00
                    CP:  3.00D+00  3.00D+00  3.00D+00  3.00D+00  3.00D+00
                    CP:  3.00D+00  3.00D+00  3.00D+00  3.00D+00  3.00D+00
                    CP:  3.00D+00  3.00D+00  1.54D+00
 E= -732.286242517323     Delta-E=       -0.000000069552 Rises=F Damp=F
 DIIS: error= 1.09D-06 at cycle  19 NSaved=  19.
 NSaved=19 IEnMin=19 EnMin= -732.286242517323     IErMin=19 ErrMin= 1.09D-06
 ErrMax= 1.09D-06  0.00D+00 EMaxC= 1.00D-01 BMatC= 1.87D-09 BMatP= 4.57D-09
 IDIUse=1 WtCom= 1.00D+00 WtEn= 0.00D+00
 Coeff-Com:  0.270D-04-0.774D-03-0.411D-03 0.360D-02 0.178D-01 0.354D-02
 Coeff-Com: -0.518D-01-0.608D-01 0.854D-01 0.123D+00-0.114D+00-0.163D+00
 Coeff-Com:  0.122D-02 0.527D+00 0.371D+00-0.801D+00-0.433D+00 0.687D+00
 Coeff-Com:  0.805D+00
 Coeff:      0.270D-04-0.774D-03-0.411D-03 0.360D-02 0.178D-01 0.354D-02
 Coeff:     -0.518D-01-0.608D-01 0.854D-01 0.123D+00-0.114D+00-0.163D+00
 Coeff:      0.122D-02 0.527D+00 0.371D+00-0.801D+00-0.433D+00 0.687D+00
 Coeff:      0.805D+00
 Gap=     0.147 Goal=   None    Shift=    0.000
 Gap=     0.280 Goal=   None    Shift=    0.000
 RMSDP=1.37D-05 MaxDP=2.10D-03 DE=-6.96D-08 OVMax= 3.68D-04

 Cycle  20  Pass 1  IDiag  1:
 RMSU=  5.05D-07    CP:  9.76D-01  1.05D+00  7.59D-01  1.40D+00  2.93D+00
                    CP:  3.00D+00  3.00D+00  3.00D+00  3.00D+00  3.00D+00
                    CP:  3.00D+00  3.00D+00  3.00D+00  3.00D+00  3.00D+00
                    CP:  3.00D+00  3.00D+00  1.70D+00  1.33D+00
 E= -732.286242526101     Delta-E=       -0.000000008779 Rises=F Damp=F
 DIIS: error= 9.46D-07 at cycle  20 NSaved=  20.
 NSaved=20 IEnMin=20 EnMin= -732.286242526101     IErMin=20 ErrMin= 9.46D-07
 ErrMax= 9.46D-07  0.00D+00 EMaxC= 1.00D-01 BMatC= 5.80D-10 BMatP= 1.87D-09
 IDIUse=1 WtCom= 1.00D+00 WtEn= 0.00D+00
 Coeff-Com:  0.656D-05 0.122D-04-0.106D-03-0.869D-03-0.229D-02 0.422D-02
 Coeff-Com:  0.126D-01-0.489D-02-0.203D-01-0.721D-02 0.452D-01 0.168D-01
 Coeff-Com: -0.998D-01-0.136D+00 0.204D+00 0.136D+00-0.580D-01-0.395D+00
 Coeff-Com:  0.228D-01 0.128D+01
 Coeff:      0.656D-05 0.122D-04-0.106D-03-0.869D-03-0.229D-02 0.422D-02
 Coeff:      0.126D-01-0.489D-02-0.203D-01-0.721D-02 0.452D-01 0.168D-01
 Coeff:     -0.998D-01-0.136D+00 0.204D+00 0.136D+00-0.580D-01-0.395D+00
 Coeff:      0.228D-01 0.128D+01
 Gap=     0.147 Goal=   None    Shift=    0.000
 Gap=     0.280 Goal=   None    Shift=    0.000
 RMSDP=4.82D-06 MaxDP=8.12D-04 DE=-8.78D-09 OVMax= 1.13D-04

 Cycle  21  Pass 1  IDiag  1:
 Restarting incremental Fock formation.
 E= -732.286242528807     Delta-E=       -0.000000002706 Rises=F Damp=F
 DIIS: error= 8.87D-07 at cycle  21 NSaved=  20.
 NSaved=20 IEnMin=20 EnMin= -732.286242528807     IErMin=20 ErrMin= 8.87D-07
 ErrMax= 8.87D-07  0.00D+00 EMaxC= 1.00D-01 BMatC= 3.29D-10 BMatP= 5.80D-10
 IDIUse=1 WtCom= 1.00D+00 WtEn= 0.00D+00
 Coeff-Com:  0.160D-03 0.126D-04-0.121D-02-0.481D-02 0.102D-02 0.172D-01
 Coeff-Com:  0.933D-02-0.273D-01-0.305D-01 0.465D-01 0.419D-01-0.409D-01
 Coeff-Com: -0.184D+00 0.305D-03 0.234D+00 0.907D-01-0.300D+00-0.177D+00
 Coeff-Com:  0.402D+00 0.922D+00
 Coeff:      0.160D-03 0.126D-04-0.121D-02-0.481D-02 0.102D-02 0.172D-01
 Coeff:      0.933D-02-0.273D-01-0.305D-01 0.465D-01 0.419D-01-0.409D-01
 Coeff:     -0.184D+00 0.305D-03 0.234D+00 0.907D-01-0.300D+00-0.177D+00
 Coeff:      0.402D+00 0.922D+00
 Gap=     0.147 Goal=   None    Shift=    0.000
 Gap=     0.280 Goal=   None    Shift=    0.000
 RMSDP=1.37D-06 MaxDP=2.04D-04 DE=-2.71D-09 OVMax= 4.23D-05

 Cycle  22  Pass 1  IDiag  1:
 RMSU=  1.28D-06    CP:  1.00D+00
 E= -732.286242529875     Delta-E=       -0.000000001067 Rises=F Damp=F
 DIIS: error= 8.49D-07 at cycle  22 NSaved=  20.
 NSaved=20 IEnMin=20 EnMin= -732.286242529875     IErMin=20 ErrMin= 8.49D-07
 ErrMax= 8.49D-07  0.00D+00 EMaxC= 1.00D-01 BMatC= 2.53D-10 BMatP= 3.29D-10
 IDIUse=1 WtCom= 1.00D+00 WtEn= 0.00D+00
 Coeff-Com:  0.346D-04 0.201D-03 0.536D-03-0.138D-02-0.300D-02 0.219D-02
 Coeff-Com:  0.652D-02-0.159D-02-0.125D-01-0.864D-03 0.393D-01 0.316D-01
 Coeff-Com: -0.905D-01-0.296D-01 0.456D-01 0.123D+00-0.426D-01-0.538D+00
 Coeff-Com:  0.245D+00 0.123D+01
 Coeff:      0.346D-04 0.201D-03 0.536D-03-0.138D-02-0.300D-02 0.219D-02
 Coeff:      0.652D-02-0.159D-02-0.125D-01-0.864D-03 0.393D-01 0.316D-01
 Coeff:     -0.905D-01-0.296D-01 0.456D-01 0.123D+00-0.426D-01-0.538D+00
 Coeff:      0.245D+00 0.123D+01
 Gap=     0.147 Goal=   None    Shift=    0.000
 Gap=     0.280 Goal=   None    Shift=    0.000
 RMSDP=8.94D-07 MaxDP=1.06D-04 DE=-1.07D-09 OVMax= 4.84D-05

 Cycle  23  Pass 1  IDiag  1:
 RMSU=  6.59D-07    CP:  1.00D+00  1.41D+00
 E= -732.286242531043     Delta-E=       -0.000000001168 Rises=F Damp=F
 DIIS: error= 8.04D-07 at cycle  23 NSaved=  20.
 NSaved=20 IEnMin=20 EnMin= -732.286242531043     IErMin=20 ErrMin= 8.04D-07
 ErrMax= 8.04D-07  0.00D+00 EMaxC= 1.00D-01 BMatC= 2.06D-10 BMatP= 2.53D-10
 IDIUse=1 WtCom= 1.00D+00 WtEn= 0.00D+00
 Coeff-Com:  0.679D-04 0.275D-03-0.206D-03-0.147D-02 0.917D-03 0.135D-02
 Coeff-Com:  0.312D-02-0.931D-02-0.401D-02 0.492D-02 0.430D-01 0.843D-02
 Coeff-Com: -0.538D-01-0.416D-01 0.832D-01 0.717D-01-0.321D-02-0.529D+00
 Coeff-Com: -0.256D+00 0.168D+01
 Coeff:      0.679D-04 0.275D-03-0.206D-03-0.147D-02 0.917D-03 0.135D-02
 Coeff:      0.312D-02-0.931D-02-0.401D-02 0.492D-02 0.430D-01 0.843D-02
 Coeff:     -0.538D-01-0.416D-01 0.832D-01 0.717D-01-0.321D-02-0.529D+00
 Coeff:     -0.256D+00 0.168D+01
 Gap=     0.147 Goal=   None    Shift=    0.000
 Gap=     0.280 Goal=   None    Shift=    0.000
 RMSDP=1.07D-06 MaxDP=1.25D-04 DE=-1.17D-09 OVMax= 5.76D-05

 Cycle  24  Pass 1  IDiag  1:
 RMSU=  4.36D-07    CP:  1.00D+00  1.58D+00  2.45D+00
 E= -732.286242532353     Delta-E=       -0.000000001310 Rises=F Damp=F
 DIIS: error= 7.37D-07 at cycle  24 NSaved=  20.
 NSaved=20 IEnMin=20 EnMin= -732.286242532353     IErMin=20 ErrMin= 7.37D-07
 ErrMax= 7.37D-07  0.00D+00 EMaxC= 1.00D-01 BMatC= 1.76D-10 BMatP= 2.06D-10
 IDIUse=1 WtCom= 1.00D+00 WtEn= 0.00D+00
 Coeff-Com: -0.239D-05 0.982D-03-0.565D-03-0.227D-02-0.228D-02 0.925D-02
 Coeff-Com:  0.476D-02-0.611D-02-0.454D-01 0.870D-02 0.119D+00-0.984D-02
 Coeff-Com: -0.105D+00-0.935D-01 0.115D+00 0.715D+00-0.753D+00-0.180D+01
 Coeff-Com:  0.883D+00 0.197D+01
 Coeff:     -0.239D-05 0.982D-03-0.565D-03-0.227D-02-0.228D-02 0.925D-02
 Coeff:      0.476D-02-0.611D-02-0.454D-01 0.870D-02 0.119D+00-0.984D-02
 Coeff:     -0.105D+00-0.935D-01 0.115D+00 0.715D+00-0.753D+00-0.180D+01
 Coeff:      0.883D+00 0.197D+01
 Gap=     0.147 Goal=   None    Shift=    0.000
 Gap=     0.280 Goal=   None    Shift=    0.000
 RMSDP=2.51D-06 MaxDP=2.81D-04 DE=-1.31D-09 OVMax= 1.31D-04

 Cycle  25  Pass 1  IDiag  1:
 RMSU=  2.03D-06    CP:  1.00D+00  1.83D+00  3.00D+00  2.53D+00
 E= -732.286242534876     Delta-E=       -0.000000002523 Rises=F Damp=F
 DIIS: error= 5.79D-07 at cycle  25 NSaved=  20.
 NSaved=20 IEnMin=20 EnMin= -732.286242534876     IErMin=20 ErrMin= 5.79D-07
 ErrMax= 5.79D-07  0.00D+00 EMaxC= 1.00D-01 BMatC= 1.15D-10 BMatP= 1.76D-10
 IDIUse=1 WtCom= 1.00D+00 WtEn= 0.00D+00
 Coeff-Com:  0.636D-03 0.195D-02-0.156D-02-0.366D-02-0.424D-02 0.143D-01
 Coeff-Com:  0.104D-02-0.118D-01-0.487D-01 0.799D-02 0.727D-01 0.274D-01
 Coeff-Com: -0.137D+00-0.406D-01 0.221D+00 0.462D+00-0.345D-01-0.253D+01
 Coeff-Com:  0.578D+00 0.243D+01
 Coeff:      0.636D-03 0.195D-02-0.156D-02-0.366D-02-0.424D-02 0.143D-01
 Coeff:      0.104D-02-0.118D-01-0.487D-01 0.799D-02 0.727D-01 0.274D-01
 Coeff:     -0.137D+00-0.406D-01 0.221D+00 0.462D+00-0.345D-01-0.253D+01
 Coeff:      0.578D+00 0.243D+01
 Gap=     0.147 Goal=   None    Shift=    0.000
 Gap=     0.280 Goal=   None    Shift=    0.000
 RMSDP=5.24D-06 MaxDP=5.72D-04 DE=-2.52D-09 OVMax= 2.65D-04

 Cycle  26  Pass 1  IDiag  1:
 RMSU=  1.83D-06    CP:  1.00D+00  2.21D+00  3.00D+00  3.00D+00  3.00D+00
 E= -732.286242538091     Delta-E=       -0.000000003215 Rises=F Damp=F
 DIIS: error= 2.53D-07 at cycle  26 NSaved=  20.
 NSaved=20 IEnMin=20 EnMin= -732.286242538091     IErMin=20 ErrMin= 2.53D-07
 ErrMax= 2.53D-07  0.00D+00 EMaxC= 1.00D-01 BMatC= 3.18D-11 BMatP= 1.15D-10
 IDIUse=1 WtCom= 1.00D+00 WtEn= 0.00D+00
 Coeff-Com: -0.255D-03 0.496D-04 0.126D-02-0.359D-02 0.133D-02 0.250D-04
 Coeff-Com:  0.144D-01-0.915D-02-0.428D-01 0.157D-01 0.486D-01 0.190D-02
 Coeff-Com: -0.535D-01-0.240D+00 0.369D+00 0.776D+00-0.777D+00-0.865D+00
 Coeff-Com:  0.519D+00 0.124D+01
 Coeff:     -0.255D-03 0.496D-04 0.126D-02-0.359D-02 0.133D-02 0.250D-04
 Coeff:      0.144D-01-0.915D-02-0.428D-01 0.157D-01 0.486D-01 0.190D-02
 Coeff:     -0.535D-01-0.240D+00 0.369D+00 0.776D+00-0.777D+00-0.865D+00
 Coeff:      0.519D+00 0.124D+01
 Gap=     0.147 Goal=   None    Shift=    0.000
 Gap=     0.280 Goal=   None    Shift=    0.000
 RMSDP=2.55D-06 MaxDP=2.77D-04 DE=-3.22D-09 OVMax= 1.29D-04

 Cycle  27  Pass 1  IDiag  1:
 RMSU=  1.71D-06    CP:  1.00D+00  2.41D+00  3.00D+00  3.00D+00  3.00D+00
                    CP:  2.02D+00
 E= -732.286242538689     Delta-E=       -0.000000000598 Rises=F Damp=F
 DIIS: error= 9.80D-08 at cycle  27 NSaved=  20.
 NSaved=20 IEnMin=20 EnMin= -732.286242538689     IErMin=20 ErrMin= 9.80D-08
 ErrMax= 9.80D-08  0.00D+00 EMaxC= 1.00D-01 BMatC= 1.17D-11 BMatP= 3.18D-11
 IDIUse=1 WtCom= 1.00D+00 WtEn= 0.00D+00
 Coeff-Com:  0.174D-03 0.632D-03-0.126D-02-0.172D-02-0.577D-04 0.104D-01
 Coeff-Com:  0.955D-02-0.261D-01-0.149D-01 0.211D-01 0.430D-01-0.193D-01
 Coeff-Com: -0.203D+00 0.574D-01 0.454D+00 0.375D+00-0.679D+00-0.433D+00
 Coeff-Com:  0.582D+00 0.825D+00
 Coeff:      0.174D-03 0.632D-03-0.126D-02-0.172D-02-0.577D-04 0.104D-01
 Coeff:      0.955D-02-0.261D-01-0.149D-01 0.211D-01 0.430D-01-0.193D-01
 Coeff:     -0.203D+00 0.574D-01 0.454D+00 0.375D+00-0.679D+00-0.433D+00
 Coeff:      0.582D+00 0.825D+00
 Gap=     0.147 Goal=   None    Shift=    0.000
 Gap=     0.280 Goal=   None    Shift=    0.000
 RMSDP=7.69D-07 MaxDP=8.22D-05 DE=-5.98D-10 OVMax= 3.86D-05

 Error on total polarization charges =  0.04355
 SCF Done:  E(UM062X) =  -732.286242539     A.U. after   27 cycles
            NFock= 27  Conv=0.77D-06     -V/T= 2.0643
 <Sx>= 0.0000 <Sy>= 0.0000 <Sz>= 1.5000 <S**2>= 4.7670 S= 1.7399
 <L.S>=  0.00000000000    
 KE= 6.880761566447D+02 PE=-3.337975525155D+03 EE= 1.077966577276D+03
 SMD-CDS (non-electrostatic) energy       (kcal/mol) =       6.39
 (included in total energy above)
 Annihilation of the first spin contaminant:
 S**2 before annihilation     4.7670,   after     3.7768
 Leave Link  502 at Sat May 27 00:50:25 2023, MaxMem=  2684354560 cpu:            1264.4 elap:             126.9
 (Enter /home/xut/apps/g16/l701.exe)
 ... and contract with generalized density number  0.
 Compute integral first derivatives.
   1 Symmetry operations used in ECPInt.
 ECPInt:  NShTT=    6105 NPrTT=   23469 LenC2=    5810 LenP2D=   15877.
 LDataN:  DoStor=T MaxTD1= 5 Len=  102
 D1PCM: PCM CHGder 1st derivatives, ID1Alg=3 FixD1E=F DoIter=F DoCFld=F I1PDM=0.
 GePol: Maximum number of non-zero 1st derivatives   =     188
 Leave Link  701 at Sat May 27 00:50:26 2023, MaxMem=  2684354560 cpu:              11.3 elap:               1.2
 (Enter /home/xut/apps/g16/l702.exe)
 L702 exits ... SP integral derivatives will be done elsewhere.
 Leave Link  702 at Sat May 27 00:50:26 2023, MaxMem=  2684354560 cpu:               0.1 elap:               0.0
 (Enter /home/xut/apps/g16/l703.exe)
 Integral derivatives from FoFJK, PRISM(SPDF).
 Compute integral first derivatives, UseDBF=F ICtDFT=           0.
 Calling FoFJK, ICntrl=      2127 FMM=F ISym2X=0 I1Cent= 0 IOpClX= 1 NMat=1 NMatS=1 NMatT=0.
 FoFJK:  IHMeth= 1 ICntrl=    2127 DoSepK=F KAlg= 0 I1Cent=           0 FoldK=F
 IRaf=         0 NMat=       1 IRICut=       1 DoRegI=T DoRafI=F ISym2E= 0 IDoP0=0 IntGTp=1.
 FoFCou: FMM=F IPFlag=           0 FMFlag=      100000 FMFlg1=         800
         NFxFlg=           0 DoJE=F BraDBF=F KetDBF=F FulRan=T
         wScrn=  0.000000 ICntrl=      2127 IOpCl=  1 I1Cent=           0 NGrid=           0
         NMat0=    1 NMatS0=      1 NMatT0=    0 NMatD0=    1 NMtDS0=    0 NMtDT0=    0
 Symmetry not used in FoFCou.
 Leave Link  703 at Sat May 27 00:50:37 2023, MaxMem=  2684354560 cpu:             106.0 elap:              10.6
 (Enter /home/xut/apps/g16/l716.exe)
 Dipole        =-1.18109886D+01 7.42809131D-01 4.51256240D-01
 ***** Axes restored to original set *****
 -------------------------------------------------------------------
 Center     Atomic                   Forces (Hartrees/Bohr)
 Number     Number              X              Y              Z
 -------------------------------------------------------------------
      1        6          -0.030875686    0.028402834   -0.001037008
      2        6           0.001168095   -0.023460196   -0.001808359
      3        6          -0.004563761    0.003569727   -0.001207084
      4        6          -0.000108403    0.009550719   -0.001181539
      5        6           0.017632601   -0.020466760    0.006143006
      6        6           0.027172149    0.046201915    0.002903825
      7        1          -0.001454114    0.000299478    0.000035962
      8        1           0.004419850   -0.002411331   -0.000273898
      9        6          -0.029343250    0.017261070    0.000248878
     10        8           0.003565793   -0.014084147    0.000105684
     11        1           0.001434996    0.004278713    0.000092905
     12        8           0.020782399   -0.001599959   -0.000142904
     13        8          -0.024013494    0.008973110    0.001602476
     14        1           0.004607579    0.002874519   -0.000764286
     15        8          -0.013572548   -0.039858982   -0.008412630
     16        1          -0.003204723    0.008679913    0.006049898
     17        8           0.027609245   -0.023899712   -0.005749872
     18        1          -0.007511495    0.001956403    0.003673962
     19       24           0.006254768   -0.006267313   -0.000279017
 -------------------------------------------------------------------
 Cartesian Forces:  Max     0.046201915 RMS     0.014581770
 Leave Link  716 at Sat May 27 00:50:37 2023, MaxMem=  2684354560 cpu:               0.2 elap:               0.0
 (Enter /home/xut/apps/g16/l103.exe)

 GradGradGradGradGradGradGradGradGradGradGradGradGradGradGradGradGradGrad
 Berny optimization.
 Using GEDIIS/GDIIS optimizer.
 FormGI is forming the generalized inverse of G from B-inverse, IUseBI=4.
 Internal  Forces:  Max     0.035360993 RMS     0.007223934
 Search for a local minimum.
 Step number   2 out of a maximum of   94
 All quantities printed in internal units (Hartrees-Bohrs-Radians)
 RMS Force = .72239D-02 SwitMx=.10000D-02 MixMth= 1
 Mixed Optimization -- RFO/linear search
 Update second derivatives using D2CorX and points    1    2
 DE= -3.49D-02 DEPred=-3.17D-02 R= 1.10D+00
 TightC=F SS=  1.41D+00  RLast= 3.31D-01 DXNew= 5.0454D-01 9.9410D-01
 Trust test= 1.10D+00 RLast= 3.31D-01 DXMaxT set to 5.05D-01
 ITU=  1  0
 Use linear search instead of GDIIS.
     Eigenvalues ---    0.00237   0.01171   0.01260   0.01295   0.01297
     Eigenvalues ---    0.01529   0.01852   0.01942   0.02001   0.02068
     Eigenvalues ---    0.02094   0.02101   0.02142   0.02290   0.02407
     Eigenvalues ---    0.02997   0.12202   0.15328   0.16000   0.16000
     Eigenvalues ---    0.16000   0.16000   0.16315   0.22352   0.23182
     Eigenvalues ---    0.23543   0.23612   0.24998   0.24999   0.24999
     Eigenvalues ---    0.25000   0.25000   0.25999   0.28769   0.35896
     Eigenvalues ---    0.37268   0.37438   0.40989   0.41158   0.42221
     Eigenvalues ---    0.43944   0.45198   0.45356   0.46287   0.52710
     Eigenvalues ---    0.55419   0.55473   0.55473   0.55648   0.67031
     Eigenvalues ---    0.80212
 RFO step:  Lambda=-1.03267116D-02 EMin= 2.36827967D-03
 Quartic linear search produced a step of  0.47181.
 Iteration  1 RMS(Cart)=  0.05756996 RMS(Int)=  0.00796679
 Iteration  2 RMS(Cart)=  0.00805737 RMS(Int)=  0.00031595
 Iteration  3 RMS(Cart)=  0.00015537 RMS(Int)=  0.00027621
 Iteration  4 RMS(Cart)=  0.00000006 RMS(Int)=  0.00027621
 ITry= 1 IFail=0 DXMaxC= 2.84D-01 DCOld= 1.00D+10 DXMaxT= 5.05D-01 DXLimC= 3.00D+00 Rises=F
 Variable       Old X    -DE/DX   Delta X   Delta X   Delta X     New X
                                 (Linear)    (Quad)   (Total)
    R1        2.58514   0.01243   0.00862   0.02542   0.03403   2.61917
    R2        2.69097   0.01285   0.01874   0.02275   0.04147   2.73243
    R3        2.56892  -0.02911  -0.06293  -0.03246  -0.09540   2.47353
    R4        2.64065  -0.00914  -0.00500  -0.02443  -0.02943   2.61122
    R5        2.04114   0.00142   0.00903  -0.00464   0.00439   2.04553
    R6        2.67920   0.00686   0.01597   0.00250   0.01849   2.69768
    R7        2.86810  -0.00342  -0.01985   0.00730  -0.01255   2.85555
    R8        2.58536  -0.00476  -0.02689   0.01236  -0.01451   2.57085
    R9        2.03939   0.00452   0.00820   0.00801   0.01622   2.05561
   R10        2.66110   0.00820   0.00743   0.01866   0.02608   2.68718
   R11        2.60858  -0.01276  -0.04422   0.00375  -0.04047   2.56812
   R12        2.53229  -0.03536  -0.08021  -0.03536  -0.11558   2.41672
   R13        2.46602   0.01092   0.00326   0.02020   0.02346   2.48948
   R14        2.30793  -0.02073  -0.03308  -0.00634  -0.03942   2.26851
   R15        1.82395   0.00152   0.00463  -0.00071   0.00391   1.82786
   R16        1.83255   0.00344   0.00869   0.00014   0.00883   1.84138
   R17        3.92268   0.00887   0.02111   0.05834   0.07945   4.00214
   R18        1.83710   0.00533   0.01083   0.00286   0.01369   1.85079
   R19        1.82932   0.00469   0.00716   0.00489   0.01205   1.84136
    A1        2.10063  -0.00134  -0.00063  -0.00118  -0.00185   2.09879
    A2        2.14422   0.01130   0.02529   0.02790   0.05318   2.19739
    A3        2.03832  -0.00996  -0.02467  -0.02676  -0.05143   1.98689
    A4        2.07611  -0.00151  -0.01220   0.00692  -0.00528   2.07083
    A5        2.10226   0.00030   0.00550  -0.00643  -0.00093   2.10133
    A6        2.10481   0.00121   0.00670  -0.00049   0.00621   2.11102
    A7        2.12047   0.00349   0.01229  -0.00189   0.01043   2.13090
    A8        2.03905  -0.00567  -0.02611   0.00454  -0.02159   2.01745
    A9        2.12365   0.00218   0.01381  -0.00267   0.01111   2.13477
   A10        2.08401   0.00264  -0.00132   0.01176   0.01049   2.09450
   A11        2.13068   0.00090   0.01533  -0.00964   0.00566   2.13634
   A12        2.06849  -0.00354  -0.01401  -0.00211  -0.01615   2.05235
   A13        2.09094  -0.00039   0.00195  -0.00507  -0.00316   2.08778
   A14        2.09311   0.00689  -0.00240   0.04161   0.03915   2.13226
   A15        2.09908  -0.00651   0.00042  -0.03665  -0.03627   2.06281
   A16        2.09417  -0.00289  -0.00011  -0.01057  -0.01073   2.08344
   A17        2.11053   0.00345   0.00762   0.00676   0.01435   2.12488
   A18        2.07844  -0.00056  -0.00753   0.00374  -0.00380   2.07463
   A19        2.11420  -0.00521   0.00934  -0.04094  -0.03159   2.08260
   A20        2.07456   0.00455  -0.00936   0.03729   0.02794   2.10250
   A21        2.09443   0.00066   0.00001   0.00364   0.00366   2.09808
   A22        2.06619  -0.00770  -0.01331  -0.04502  -0.05832   2.00787
   A23        1.93869   0.00421   0.01324   0.02507   0.03706   1.97575
   A24        2.20410  -0.00003  -0.00987   0.01861   0.00751   2.21161
   A25        2.06581  -0.00305  -0.00069  -0.01445  -0.01644   2.04937
   A26        1.90072   0.00880  -0.00468   0.08218   0.07750   1.97822
   A27        1.88981   0.00783  -0.00982   0.08188   0.07205   1.96186
    D1       -0.00083  -0.00002  -0.00039   0.00018  -0.00015  -0.00098
    D2        3.13929  -0.00016  -0.00109  -0.00230  -0.00342   3.13587
    D3       -3.13737   0.00048   0.00200   0.00962   0.01207  -3.12530
    D4        0.00275   0.00033   0.00130   0.00714   0.00880   0.01154
    D5       -0.00585  -0.00035  -0.00276  -0.00312  -0.00587  -0.01172
    D6       -3.13701   0.00034   0.00216   0.00491   0.00714  -3.12987
    D7        3.13099  -0.00076  -0.00501  -0.01185  -0.01641   3.11458
    D8       -0.00017  -0.00006  -0.00008  -0.00382  -0.00340  -0.00357
    D9       -0.48201   0.00480   0.01962   0.17399   0.19358  -0.28843
   D10        2.66446   0.00526   0.02192   0.18305   0.20501   2.86947
   D11        0.00371   0.00021   0.00175   0.00164   0.00342   0.00712
   D12        3.13922  -0.00014  -0.00112  -0.00143  -0.00245   3.13677
   D13       -3.13641   0.00035   0.00245   0.00413   0.00671  -3.12969
   D14       -0.00089   0.00000  -0.00042   0.00107   0.00084  -0.00005
   D15        0.00021   0.00000   0.00010  -0.00045  -0.00041  -0.00020
   D16        3.14070   0.00005  -0.00042   0.00426   0.00386  -3.13863
   D17       -3.13501   0.00039   0.00311   0.00274   0.00597  -3.12904
   D18        0.00548   0.00044   0.00258   0.00745   0.01024   0.01572
   D19       -3.13574   0.00034   0.00276   0.00503   0.00776  -3.12798
   D20        0.00504   0.00029   0.00238   0.00449   0.00684   0.01188
   D21       -0.00024  -0.00001  -0.00011   0.00195   0.00187   0.00163
   D22        3.14054  -0.00006  -0.00050   0.00142   0.00095   3.14149
   D23       -0.00693  -0.00041  -0.00327  -0.00253  -0.00584  -0.01277
   D24       -3.13698   0.00045   0.00218   0.00881   0.01134  -3.12564
   D25        3.13573  -0.00046  -0.00277  -0.00707  -0.00992   3.12581
   D26        0.00568   0.00040   0.00268   0.00427   0.00726   0.01294
   D27        0.00977   0.00056   0.00461   0.00422   0.00881   0.01859
   D28        3.14112  -0.00010  -0.00022  -0.00364  -0.00371   3.13741
   D29        3.13979  -0.00021  -0.00085  -0.00663  -0.00719   3.13260
   D30       -0.01205  -0.00087  -0.00568  -0.01450  -0.01971  -0.03176
   D31       -2.64251  -0.00257  -0.01157  -0.06995  -0.08173  -2.72424
   D32        0.08274  -0.00015  -0.00383   0.00426   0.00057   0.08331
   D33        0.51068  -0.00176  -0.00609  -0.05877  -0.06500   0.44568
   D34       -3.04726   0.00066   0.00164   0.01544   0.01730  -3.02996
   D35       -0.44376   0.00692   0.03767   0.18866   0.22630  -0.21746
   D36        2.70817   0.00763   0.04255   0.19671   0.23929   2.94746
   D37        0.00090   0.00010   0.00043   0.00173   0.00216   0.00306
   D38       -3.13987   0.00015   0.00081   0.00225   0.00306  -3.13680
         Item               Value     Threshold  Converged?
 Maximum Force            0.035361     0.000450     NO 
 RMS     Force            0.007224     0.000300     NO 
 Maximum Displacement     0.283613     0.001800     NO 
 RMS     Displacement     0.062343     0.001200     NO 
 Predicted change in Energy=-1.373583D-02
 Lowest energy point so far.  Saving SCF results.
 GradGradGradGradGradGradGradGradGradGradGradGradGradGradGradGradGradGrad

 Leave Link  103 at Sat May 27 00:50:37 2023, MaxMem=  2684354560 cpu:               0.2 elap:               0.0
 (Enter /home/xut/apps/g16/l202.exe)
                          Input orientation:                          
 ---------------------------------------------------------------------
 Center     Atomic      Atomic             Coordinates (Angstroms)
 Number     Number       Type             X           Y           Z
 ---------------------------------------------------------------------
      1          6           0       -1.596237    1.677742    0.009440
      2          6           0       -2.207770    0.434217    0.035662
      3          6           0       -1.411907   -0.694897    0.068416
      4          6           0        0.013475   -0.617888    0.084596
      5          6           0        0.629520    0.594953    0.067486
      6          6           0       -0.153981    1.780582    0.017709
      7          1           0       -3.287288    0.354612    0.034887
      8          1           0        0.644852   -1.503381    0.107650
      9          6           0       -2.150055   -2.013002    0.102194
     10          8           0       -1.463153   -3.136097    0.150133
     11          1           0       -0.502042   -3.027970    0.163157
     12          8           0       -3.350126   -2.039070    0.087395
     13          8           0        1.982818    0.719117    0.063453
     14          1           0        2.290916    1.574222    0.414671
     15          8           0        0.439941    2.913123    0.006860
     16          1           0       -0.156128    3.661946   -0.200933
     17          8           0       -2.209034    2.834274   -0.005492
     18          1           0       -3.148076    2.753882   -0.252889
     19         24           0        3.398031   -0.851640   -0.059576
 ---------------------------------------------------------------------
                    Distance matrix (angstroms):
                    1          2          3          4          5
     1  C    0.000000
     2  C    1.386007   0.000000
     3  C    2.380520   1.381799   0.000000
     4  C    2.804771   2.458301   1.427552   0.000000
     5  C    2.475843   2.842017   2.414775   1.360436   0.000000
     6  C    1.445942   2.455823   2.777219   2.405238   1.421994
     7  H    2.147317   1.082449   2.149336   3.441404   3.924309
     8  H    3.892515   3.449191   2.210304   1.087781   2.098774
     9  C    3.733217   2.448803   1.511093   2.574396   3.811649
    10  O    4.817733   3.648931   2.443104   2.919949   4.278649
    11  H    4.833696   3.861670   2.506004   2.465852   3.796729
    12  O    4.110584   2.724849   2.358782   3.651517   4.772426
    13  O    3.705606   4.200353   3.677447   2.380408   1.358988
    14  H    3.909589   4.656332   4.356568   3.178212   1.959526
    15  O    2.381637   3.627144   4.055976   3.557520   2.326699
    16  H    2.460739   3.831899   4.542204   4.292700   3.177379
    17  O    1.308934   2.400411   3.618829   4.106712   3.616251
    18  H    1.906593   2.519580   3.874480   4.634450   4.362779
    19  Cr   5.598683   5.752174   4.814193   3.395681   3.126249
                    6          7          8          9         10
     6  C    0.000000
     7  H    3.442571   0.000000
     8  H    3.380922   4.349616   0.000000
     9  C    4.287508   2.627437   2.840995   0.000000
    10  O    5.089714   3.940279   2.666693   1.317374   0.000000
    11  H    4.823326   4.383595   1.908617   1.936446   0.967262
    12  O    4.980958   2.395083   4.030785   1.200445   2.183591
    13  O    2.386359   5.282773   2.594533   4.954454   5.171547
    14  H    2.485495   5.722590   3.503630   5.717345   6.029105
    15  O    1.278871   4.520951   4.422403   5.566316   6.343134
    16  H    1.894028   4.560507   5.236163   6.022679   6.931446
    17  O    2.309556   2.704253   5.193527   4.848831   6.018794
    18  H    3.159927   2.420473   5.713194   4.883166   6.139482
    19  Cr   4.421692   6.793928   2.834206   5.670643   5.375298
                   11         12         13         14         15
    11  H    0.000000
    12  O    3.015832   0.000000
    13  O    4.497236   6.004037   0.000000
    14  H    5.389252   6.707036   0.974414   0.000000
    15  O    6.017337   6.236611   2.682785   2.320576   0.000000
    16  H    6.708740   6.541127   3.647634   3.274994   0.979394
    17  O    6.108042   5.006017   4.695771   4.691888   2.650177
    18  H    6.372158   4.809263   5.528690   5.605342   3.600930
    19  Cr   4.471755   6.853409   2.117839   2.708398   4.788334
                   16         17         18         19
    16  H    0.000000
    17  O    2.222085   0.000000
    18  H    3.127144   0.974406   0.000000
    19  Cr   5.746694   6.710296   7.475873   0.000000
 Stoichiometry    C7H6CrO5(3+,4)
 Framework group  C1[X(C7H6CrO5)]
 Deg. of freedom    51
 Full point group                 C1      NOp   1
 RotChk:  IX=2 Diff= 3.21D-02
 Largest Abelian subgroup         C1      NOp   1
 Largest concise Abelian subgroup C1      NOp   1
                         Standard orientation:                         
 ---------------------------------------------------------------------
 Center     Atomic      Atomic             Coordinates (Angstroms)
 Number     Number       Type             X           Y           Z
 ---------------------------------------------------------------------
      1          6           0        1.607187    1.655561    0.017527
      2          6           0        2.206020    0.405602    0.021471
      3          6           0        1.398974   -0.715739   -0.003860
      4          6           0       -0.025137   -0.624496   -0.042411
      5          6           0       -0.628669    0.594674   -0.055009
      6          6           0        0.166358    1.772936   -0.013802
      7          1           0        3.284521    0.315025    0.039554
      8          1           0       -0.665322   -1.503774   -0.059750
      9          6           0        2.123734   -2.041682   -0.004331
     10          8           0        1.425916   -3.158375   -0.043335
     11          1           0        0.466279   -3.040699   -0.072398
     12          8           0        3.323123   -2.079722    0.028643
     13          8           0       -1.980512    0.732674   -0.073088
     14          1           0       -2.274502    1.584730   -0.443294
     15          8           0       -0.415802    2.911490   -0.030971
     16          1           0        0.184956    3.657652    0.172861
     17          8           0        2.231743    2.805874    0.021869
     18          1           0        3.166181    2.720168    0.284448
     19         24           0       -3.413695   -0.821240    0.055672
 ---------------------------------------------------------------------
 Rotational constants (GHZ):           0.7146719           0.4364527           0.2711719
 Leave Link  202 at Sat May 27 00:50:37 2023, MaxMem=  2684354560 cpu:               0.0 elap:               0.0
 (Enter /home/xut/apps/g16/l301.exe)
 Basis read from rwf:  (5D, 7F)
 Pseudo-potential data read from rwf file.
 There are   342 symmetry adapted cartesian basis functions of A   symmetry.
 There are   328 symmetry adapted basis functions of A   symmetry.
   328 basis functions,   538 primitive gaussians,   342 cartesian basis functions
    51 alpha electrons       48 beta electrons
       nuclear repulsion energy       842.1403073320 Hartrees.
 IExCor= 4336 DFT=T Ex+Corr=M062X ExCW=0 ScaHFX=  0.540000
 ScaDFX=  1.000000  1.000000  1.000000  1.000000 ScalE2=  1.000000  1.000000
 IRadAn=      5 IRanWt=     -1 IRanGd=            0 ICorTp=0 IEmpDi=  4
 NAtoms=   19 NActive=   19 NUniq=   19 SFac= 1.00D+00 NAtFMM=   60 NAOKFM=F Big=F
 Integral buffers will be    131072 words long.
 Raffenetti 2 integral format.
 Two-electron integral symmetry is turned on.
 No density basis found on file   724.
 ------------------------------------------------------------------------------
 Polarizable Continuum Model (PCM)
 =================================
 Model                : PCM.
 Atomic radii         : SMD-Coulomb.
 Polarization charges : Total charges.
 Charge compensation  : None.
 Solution method      : On-the-fly selection.
 Cavity type          : VdW (van der Waals Surface) (Alpha=1.000).
 Cavity algorithm     : GePol (No added spheres)
                        Default sphere list used, NSphG=   19.
                        Lebedev-Laikov grids with approx.  5.0 points / Ang**2.
                        Smoothing algorithm: York/Karplus (Gamma=1.0000).
                        Polarization charges: spherical gaussians, with
                                              point-specific exponents (IZeta= 3).
                        Self-potential: point-specific (ISelfS= 7).
                        Self-field    : sphere-specific E.n sum rule (ISelfD= 2).
 1st derivatives      : Analytical E(r).r(x)/FMM algorithm (CHGder, D1EAlg=3).
                        Cavity 1st derivative terms included.
 Solvent              : Water, Eps=  78.355300 Eps(inf)=   1.777849
 ------------------------------------------------------------------------------
 Spheres list:
 ISph  on   Nord     Re0    Alpha      Xe            Ye            Ze
    1   C      1    1.8500  1.000      1.607187      1.655561      0.017527
    2   C      2    1.8500  1.000      2.206020      0.405602      0.021471
    3   C      3    1.8500  1.000      1.398974     -0.715739     -0.003860
    4   C      4    1.8500  1.000     -0.025137     -0.624496     -0.042411
    5   C      5    1.8500  1.000     -0.628669      0.594674     -0.055009
    6   C      6    1.8500  1.000      0.166358      1.772936     -0.013802
    7   H      7    1.2000  1.000      3.284521      0.315025      0.039554
    8   H      8    1.2000  1.000     -0.665322     -1.503774     -0.059750
    9   C      9    1.8500  1.000      2.123734     -2.041682     -0.004331
   10   O     10    1.5200  1.000      1.425916     -3.158375     -0.043335
   11   H     11    1.2000  1.000      0.466279     -3.040699     -0.072398
   12   O     12    1.5200  1.000      3.323123     -2.079722      0.028643
   13   O     13    1.5200  1.000     -1.980512      0.732674     -0.073088
   14   H     14    1.2000  1.000     -2.274502      1.584730     -0.443294
   15   O     15    1.5200  1.000     -0.415802      2.911490     -0.030971
   16   H     16    1.2000  1.000      0.184956      3.657652      0.172861
   17   O     17    1.5200  1.000      2.231743      2.805874      0.021869
   18   H     18    1.2000  1.000      3.166181      2.720168      0.284448
   19  Cr     19    1.5115  1.000     -3.413695     -0.821240      0.055672
 ------------------------------------------------------------------------------
 GePol: Number of generator spheres                  =      19
 GePol: Total number of spheres                      =      19
 GePol: Number of exposed spheres                    =      19 (100.00%)
 GePol: Number of points                             =    1460
 GePol: Average weight of points                     =       0.13
 GePol: Minimum weight of points                     =   0.69D-08
 GePol: Maximum weight of points                     =    0.21991
 GePol: Number of points with low weight             =      74
 GePol: Fraction of low-weight points (<1% of avg)   =       5.07%
 GePol: Cavity surface area                          =    187.079 Ang**2
 GePol: Cavity volume                                =    154.813 Ang**3
 ------------------------------------------------------------------------------
 Atomic radii for non-electrostatic terms: SMD-CDS.
 ------------------------------------------------------------------------------
 PCM non-electrostatic energy =         0.0108839973 Hartrees.
 Nuclear repulsion after PCM non-electrostatic terms =      842.1511913293 Hartrees.
 Leave Link  301 at Sat May 27 00:50:37 2023, MaxMem=  2684354560 cpu:               0.6 elap:               0.1
 (Enter /home/xut/apps/g16/l302.exe)
 NPDir=0 NMtPBC=     1 NCelOv=     1 NCel=       1 NClECP=     1 NCelD=      1
         NCelK=      1 NCelE2=     1 NClLst=     1 CellRange=     0.0.
 One-electron integrals computed using PRISM.
 One-electron integral symmetry used in STVInt
   1 Symmetry operations used in ECPInt.
 ECPInt:  NShTT=    6105 NPrTT=   23469 LenC2=    5813 LenP2D=   15882.
 LDataN:  DoStor=T MaxTD1= 4 Len=   56
 NBasis=   328 RedAO= T EigKep=  1.23D-06  NBF=   328
 NBsUse=   327 1.00D-06 EigRej=  7.00D-07 NBFU=   327
 Precomputing XC quadrature grid using
 IXCGrd= 4 IRadAn=           5 IRanWt=          -1 IRanGd=           0 AccXCQ= 0.00D+00.
 Generated NRdTot=       0 NPtTot=           0 NUsed=           0 NTot=          32
 NSgBfM=   342   342   342   342   342 MxSgAt=    19 MxSgA2=    19.
 Leave Link  302 at Sat May 27 00:50:37 2023, MaxMem=  2684354560 cpu:               2.3 elap:               0.2
 (Enter /home/xut/apps/g16/l303.exe)
 DipDrv:  MaxL=1.
 Leave Link  303 at Sat May 27 00:50:37 2023, MaxMem=  2684354560 cpu:               0.3 elap:               0.0
 (Enter /home/xut/apps/g16/l401.exe)
 Initial guess from the checkpoint file:  "149-91-7-meta13-Cr.chk"
 B after Tr=     0.000000    0.000000    0.000000
         Rot=    0.999961    0.000140    0.000168   -0.008797 Ang=   1.01 deg.
 Guess basis will be translated and rotated to current coordinates.
 JPrj=2 DoOrth=T DoCkMO=T.
 Initial guess <Sx>= 0.0000 <Sy>= 0.0000 <Sz>= 1.5000 <S**2>= 4.7671 S= 1.7399
 Generating alternative initial guess.
 ExpMin= 1.90D-02 ExpMax= 8.59D+03 ExpMxC= 1.30D+03 IAcc=3 IRadAn=         5 AccDes= 0.00D+00
 Harris functional with IExCor= 1009 and IRadAn=       5 diagonalized for initial guess.
 HarFok:  IExCor= 1009 AccDes= 0.00D+00 IRadAn=         5 IDoV= 1 UseB2=F ITyADJ=14
 ICtDFT=  3500011 ScaDFX=  1.000000  1.000000  1.000000  1.000000
 FoFCou: FMM=F IPFlag=           0 FMFlag=      100000 FMFlg1=           0
         NFxFlg=           0 DoJE=T BraDBF=F KetDBF=T FulRan=T
         wScrn=  0.000000 ICntrl=       500 IOpCl=  0 I1Cent=   200000004 NGrid=           0
         NMat0=    1 NMatS0=      1 NMatT0=    0 NMatD0=    1 NMtDS0=    0 NMtDT0=    0
 Petite list used in FoFCou.
 Harris En= -732.136354134267    
 Leave Link  401 at Sat May 27 00:50:39 2023, MaxMem=  2684354560 cpu:              10.8 elap:               1.1
 (Enter /home/xut/apps/g16/l502.exe)
 Integral symmetry usage will be decided dynamically.
 UHF open shell SCF:
 Using DIIS extrapolation, IDIIS=  1040.
 NGot=  2684354560 LenX=  2684113999 LenY=  2683996594
 Requested convergence on RMS density matrix=1.00D-06 within 128 cycles.
 Requested convergence on MAX density matrix=1.00D-04.
 Requested convergence on             energy=1.00D-04.
 No special actions if energy rises.
 Fock matrices will be formed incrementally for  20 cycles.

 Cycle   1  Pass 1  IDiag  1:
 FoFJK:  IHMeth= 1 ICntrl=       0 DoSepK=F KAlg= 0 I1Cent=           0 FoldK=F
 IRaf= 920000000 NMat=       1 IRICut=       1 DoRegI=T DoRafI=F ISym2E= 0 IDoP0=0 IntGTp=1.
 FoFCou: FMM=F IPFlag=           0 FMFlag=      100000 FMFlg1=           0
         NFxFlg=           0 DoJE=F BraDBF=F KetDBF=F FulRan=T
         wScrn=  0.000000 ICntrl=         0 IOpCl=  1 I1Cent=           0 NGrid=           0
         NMat0=    1 NMatS0=      1 NMatT0=    0 NMatD0=    1 NMtDS0=    0 NMtDT0=    0
 Symmetry not used in FoFCou.
 Inv3:  Mode=1 IEnd=     6394800.
 Iteration    1 A*A^-1 deviation from unit magnitude is 2.66D-15 for    746.
 Iteration    1 A*A^-1 deviation from orthogonality  is 1.49D-15 for   1114    935.
 Iteration    1 A^-1*A deviation from unit magnitude is 3.00D-15 for    377.
 Iteration    1 A^-1*A deviation from orthogonality  is 1.56D-15 for    546    215.
 E= -732.275191398103    
 DIIS: error= 4.47D-03 at cycle   1 NSaved=   1.
 NSaved= 1 IEnMin= 1 EnMin= -732.275191398103     IErMin= 1 ErrMin= 4.47D-03
 ErrMax= 4.47D-03  0.00D+00 EMaxC= 1.00D-01 BMatC= 6.88D-02 BMatP= 6.88D-02
 IDIUse=3 WtCom= 9.55D-01 WtEn= 4.47D-02
 Coeff-Com:  0.100D+01
 Coeff-En:   0.100D+01
 Coeff:      0.100D+01
 Gap=     0.465 Goal=   None    Shift=    0.000
 Gap=     0.469 Goal=   None    Shift=    0.000
 GapD=    0.465 DampG=2.000 DampE=1.000 DampFc=2.0000 IDamp=-1.
 RMSDP=1.64D-02 MaxDP=2.10D+00              OVMax= 2.93D-02

 Cycle   2  Pass 1  IDiag  1:
 RMSU=  1.45D-02    CP:  9.20D-01
 E= -732.296506894372     Delta-E=       -0.021315496269 Rises=F Damp=F
 DIIS: error= 1.10D-03 at cycle   2 NSaved=   2.
 NSaved= 2 IEnMin= 2 EnMin= -732.296506894372     IErMin= 2 ErrMin= 1.10D-03
 ErrMax= 1.10D-03  0.00D+00 EMaxC= 1.00D-01 BMatC= 2.84D-03 BMatP= 6.88D-02
 IDIUse=3 WtCom= 9.89D-01 WtEn= 1.10D-02
 Coeff-Com: -0.736D-01 0.107D+01
 Coeff-En:   0.000D+00 0.100D+01
 Coeff:     -0.728D-01 0.107D+01
 Gap=     0.159 Goal=   None    Shift=    0.000
 Gap=     0.276 Goal=   None    Shift=    0.000
 RMSDP=1.55D-03 MaxDP=1.61D-01 DE=-2.13D-02 OVMax= 9.95D-03

 Cycle   3  Pass 1  IDiag  1:
 RMSU=  1.02D-03    CP:  9.21D-01  1.08D+00
 E= -732.297227879276     Delta-E=       -0.000720984903 Rises=F Damp=F
 DIIS: error= 9.91D-04 at cycle   3 NSaved=   3.
 NSaved= 3 IEnMin= 3 EnMin= -732.297227879276     IErMin= 3 ErrMin= 9.91D-04
 ErrMax= 9.91D-04  0.00D+00 EMaxC= 1.00D-01 BMatC= 2.04D-03 BMatP= 2.84D-03
 IDIUse=3 WtCom= 9.90D-01 WtEn= 9.91D-03
 Coeff-Com: -0.657D-01 0.519D+00 0.547D+00
 Coeff-En:   0.000D+00 0.000D+00 0.100D+01
 Coeff:     -0.651D-01 0.514D+00 0.551D+00
 Gap=     0.157 Goal=   None    Shift=    0.000
 Gap=     0.275 Goal=   None    Shift=    0.000
 RMSDP=3.30D-04 MaxDP=2.54D-02 DE=-7.21D-04 OVMax= 8.72D-03

 Cycle   4  Pass 1  IDiag  1:
 RMSU=  3.08D-04    CP:  9.22D-01  1.09D+00  9.29D-01
 E= -732.297632282999     Delta-E=       -0.000404403724 Rises=F Damp=F
 DIIS: error= 3.14D-04 at cycle   4 NSaved=   4.
 NSaved= 4 IEnMin= 4 EnMin= -732.297632282999     IErMin= 4 ErrMin= 3.14D-04
 ErrMax= 3.14D-04  0.00D+00 EMaxC= 1.00D-01 BMatC= 1.35D-04 BMatP= 2.04D-03
 IDIUse=3 WtCom= 9.97D-01 WtEn= 3.14D-03
 Coeff-Com: -0.753D-02 0.521D-03 0.184D+00 0.823D+00
 Coeff-En:   0.000D+00 0.000D+00 0.000D+00 0.100D+01
 Coeff:     -0.750D-02 0.519D-03 0.184D+00 0.823D+00
 Gap=     0.157 Goal=   None    Shift=    0.000
 Gap=     0.275 Goal=   None    Shift=    0.000
 RMSDP=1.73D-04 MaxDP=1.18D-02 DE=-4.04D-04 OVMax= 7.15D-03

 Cycle   5  Pass 1  IDiag  1:
 RMSU=  1.18D-04    CP:  9.22D-01  1.08D+00  9.88D-01  8.35D-01
 E= -732.297692373514     Delta-E=       -0.000060090515 Rises=F Damp=F
 DIIS: error= 2.44D-04 at cycle   5 NSaved=   5.
 NSaved= 5 IEnMin= 5 EnMin= -732.297692373514     IErMin= 5 ErrMin= 2.44D-04
 ErrMax= 2.44D-04  0.00D+00 EMaxC= 1.00D-01 BMatC= 1.89D-05 BMatP= 1.35D-04
 IDIUse=3 WtCom= 9.98D-01 WtEn= 2.44D-03
 Coeff-Com:  0.415D-02-0.553D-01 0.107D-01 0.250D+00 0.790D+00
 Coeff-En:   0.000D+00 0.000D+00 0.000D+00 0.000D+00 0.100D+01
 Coeff:      0.414D-02-0.551D-01 0.107D-01 0.249D+00 0.791D+00
 Gap=     0.158 Goal=   None    Shift=    0.000
 Gap=     0.275 Goal=   None    Shift=    0.000
 RMSDP=9.21D-05 MaxDP=7.53D-03 DE=-6.01D-05 OVMax= 5.91D-03

 Cycle   6  Pass 1  IDiag  1:
 RMSU=  7.23D-05    CP:  9.22D-01  1.08D+00  1.01D+00  7.70D-01  1.17D+00
 E= -732.297715666594     Delta-E=       -0.000023293080 Rises=F Damp=F
 DIIS: error= 1.98D-04 at cycle   6 NSaved=   6.
 NSaved= 6 IEnMin= 6 EnMin= -732.297715666594     IErMin= 6 ErrMin= 1.98D-04
 ErrMax= 1.98D-04  0.00D+00 EMaxC= 1.00D-01 BMatC= 7.30D-06 BMatP= 1.89D-05
 IDIUse=3 WtCom= 9.98D-01 WtEn= 1.98D-03
 Coeff-Com:  0.327D-02-0.229D-01-0.272D-01-0.829D-01 0.226D+00 0.904D+00
 Coeff-En:   0.000D+00 0.000D+00 0.000D+00 0.000D+00 0.000D+00 0.100D+01
 Coeff:      0.327D-02-0.228D-01-0.271D-01-0.827D-01 0.225D+00 0.904D+00
 Gap=     0.158 Goal=   None    Shift=    0.000
 Gap=     0.275 Goal=   None    Shift=    0.000
 RMSDP=7.66D-05 MaxDP=1.17D-02 DE=-2.33D-05 OVMax= 6.49D-03

 Cycle   7  Pass 1  IDiag  1:
 RMSU=  3.13D-05    CP:  9.23D-01  1.08D+00  1.01D+00  7.55D-01  1.28D+00
                    CP:  1.79D+00
 E= -732.297733540509     Delta-E=       -0.000017873914 Rises=F Damp=F
 DIIS: error= 1.72D-04 at cycle   7 NSaved=   7.
 NSaved= 7 IEnMin= 7 EnMin= -732.297733540509     IErMin= 7 ErrMin= 1.72D-04
 ErrMax= 1.72D-04  0.00D+00 EMaxC= 1.00D-01 BMatC= 4.84D-06 BMatP= 7.30D-06
 IDIUse=3 WtCom= 9.98D-01 WtEn= 1.72D-03
 Coeff-Com: -0.140D-02 0.214D-01-0.262D-03-0.140D+00-0.379D+00 0.352D+00
 Coeff-Com:  0.115D+01
 Coeff-En:   0.000D+00 0.000D+00 0.000D+00 0.000D+00 0.000D+00 0.000D+00
 Coeff-En:   0.100D+01
 Coeff:     -0.140D-02 0.213D-01-0.262D-03-0.139D+00-0.379D+00 0.351D+00
 Coeff:      0.115D+01
 Gap=     0.158 Goal=   None    Shift=    0.000
 Gap=     0.275 Goal=   None    Shift=    0.000
 RMSDP=1.05D-04 MaxDP=1.39D-02 DE=-1.79D-05 OVMax= 8.50D-03

 Cycle   8  Pass 1  IDiag  1:
 RMSU=  1.93D-05    CP:  9.23D-01  1.07D+00  1.00D+00  6.83D-01  1.42D+00
                    CP:  2.92D+00  2.07D+00
 E= -732.297751447593     Delta-E=       -0.000017907085 Rises=F Damp=F
 DIIS: error= 1.12D-04 at cycle   8 NSaved=   8.
 NSaved= 8 IEnMin= 8 EnMin= -732.297751447593     IErMin= 8 ErrMin= 1.12D-04
 ErrMax= 1.12D-04  0.00D+00 EMaxC= 1.00D-01 BMatC= 2.64D-06 BMatP= 4.84D-06
 IDIUse=3 WtCom= 9.99D-01 WtEn= 1.12D-03
 Coeff-Com: -0.241D-02 0.228D-01 0.226D-01-0.195D-01-0.346D+00-0.252D+00
 Coeff-Com:  0.521D+00 0.105D+01
 Coeff-En:   0.000D+00 0.000D+00 0.000D+00 0.000D+00 0.000D+00 0.000D+00
 Coeff-En:   0.000D+00 0.100D+01
 Coeff:     -0.241D-02 0.228D-01 0.225D-01-0.195D-01-0.345D+00-0.252D+00
 Coeff:      0.521D+00 0.105D+01
 Gap=     0.158 Goal=   None    Shift=    0.000
 Gap=     0.276 Goal=   None    Shift=    0.000
 RMSDP=1.10D-04 MaxDP=1.84D-02 DE=-1.79D-05 OVMax= 7.90D-03

 Cycle   9  Pass 1  IDiag  1:
 RMSU=  7.76D-05    CP:  9.24D-01  1.07D+00  9.86D-01  6.32D-01  1.48D+00
                    CP:  3.00D+00  3.00D+00  2.11D+00
 E= -732.297763540067     Delta-E=       -0.000012092474 Rises=F Damp=F
 DIIS: error= 7.60D-05 at cycle   9 NSaved=   9.
 NSaved= 9 IEnMin= 9 EnMin= -732.297763540067     IErMin= 9 ErrMin= 7.60D-05
 ErrMax= 7.60D-05  0.00D+00 EMaxC= 1.00D-01 BMatC= 1.22D-06 BMatP= 2.64D-06
 IDIUse=1 WtCom= 1.00D+00 WtEn= 0.00D+00
 Coeff-Com:  0.398D-03-0.931D-02 0.925D-02 0.767D-01 0.146D+00-0.191D+00
 Coeff-Com: -0.619D+00 0.108D+00 0.148D+01
 Coeff:      0.398D-03-0.931D-02 0.925D-02 0.767D-01 0.146D+00-0.191D+00
 Coeff:     -0.619D+00 0.108D+00 0.148D+01
 Gap=     0.158 Goal=   None    Shift=    0.000
 Gap=     0.276 Goal=   None    Shift=    0.000
 RMSDP=1.30D-04 MaxDP=2.27D-02 DE=-1.21D-05 OVMax= 7.88D-03

 Cycle  10  Pass 1  IDiag  1:
 RMSU=  3.70D-05    CP:  9.24D-01  1.07D+00  9.62D-01  5.77D-01  1.51D+00
                    CP:  3.00D+00  3.00D+00  3.00D+00  2.32D+00
 E= -732.297771917306     Delta-E=       -0.000008377238 Rises=F Damp=F
 DIIS: error= 2.97D-05 at cycle  10 NSaved=  10.
 NSaved=10 IEnMin=10 EnMin= -732.297771917306     IErMin=10 ErrMin= 2.97D-05
 ErrMax= 2.97D-05  0.00D+00 EMaxC= 1.00D-01 BMatC= 6.61D-07 BMatP= 1.22D-06
 IDIUse=1 WtCom= 1.00D+00 WtEn= 0.00D+00
 Coeff-Com:  0.108D-02-0.120D-01-0.602D-02 0.212D-01 0.168D+00 0.898D-01
 Coeff-Com: -0.389D+00-0.456D+00 0.383D+00 0.120D+01
 Coeff:      0.108D-02-0.120D-01-0.602D-02 0.212D-01 0.168D+00 0.898D-01
 Coeff:     -0.389D+00-0.456D+00 0.383D+00 0.120D+01
 Gap=     0.158 Goal=   None    Shift=    0.000
 Gap=     0.276 Goal=   None    Shift=    0.000
 RMSDP=1.02D-04 MaxDP=1.69D-02 DE=-8.38D-06 OVMax= 4.86D-03

 Cycle  11  Pass 1  IDiag  1:
 RMSU=  3.03D-05    CP:  9.25D-01  1.07D+00  9.38D-01  5.36D-01  1.55D+00
                    CP:  3.00D+00  3.00D+00  3.00D+00  3.00D+00  1.92D+00
 E= -732.297775700904     Delta-E=       -0.000003783598 Rises=F Damp=F
 DIIS: error= 2.59D-05 at cycle  11 NSaved=  11.
 NSaved=11 IEnMin=11 EnMin= -732.297775700904     IErMin=11 ErrMin= 2.59D-05
 ErrMax= 2.59D-05  0.00D+00 EMaxC= 1.00D-01 BMatC= 3.69D-07 BMatP= 6.61D-07
 IDIUse=1 WtCom= 1.00D+00 WtEn= 0.00D+00
 Coeff-Com: -0.127D-03 0.369D-02-0.398D-02-0.337D-01-0.582D-01 0.105D+00
 Coeff-Com:  0.250D+00-0.482D-01-0.644D+00 0.324D-01 0.140D+01
 Coeff:     -0.127D-03 0.369D-02-0.398D-02-0.337D-01-0.582D-01 0.105D+00
 Coeff:      0.250D+00-0.482D-01-0.644D+00 0.324D-01 0.140D+01
 Gap=     0.157 Goal=   None    Shift=    0.000
 Gap=     0.276 Goal=   None    Shift=    0.000
 RMSDP=7.83D-05 MaxDP=1.19D-02 DE=-3.78D-06 OVMax= 2.59D-03

 Cycle  12  Pass 1  IDiag  1:
 RMSU=  2.20D-05    CP:  9.25D-01  1.07D+00  9.16D-01  5.05D-01  1.60D+00
                    CP:  3.00D+00  3.00D+00  3.00D+00  3.00D+00  2.66D+00
                    CP:  2.93D+00
 E= -732.297777745737     Delta-E=       -0.000002044833 Rises=F Damp=F
 DIIS: error= 2.35D-05 at cycle  12 NSaved=  12.
 NSaved=12 IEnMin=12 EnMin= -732.297777745737     IErMin=12 ErrMin= 2.35D-05
 ErrMax= 2.35D-05  0.00D+00 EMaxC= 1.00D-01 BMatC= 2.75D-07 BMatP= 3.69D-07
 IDIUse=1 WtCom= 1.00D+00 WtEn= 0.00D+00
 Coeff-Com: -0.475D-03 0.611D-02 0.856D-03-0.200D-01-0.847D-01-0.127D-01
 Coeff-Com:  0.233D+00 0.178D+00-0.359D+00-0.429D+00 0.423D+00 0.107D+01
 Coeff:     -0.475D-03 0.611D-02 0.856D-03-0.200D-01-0.847D-01-0.127D-01
 Coeff:      0.233D+00 0.178D+00-0.359D+00-0.429D+00 0.423D+00 0.107D+01
 Gap=     0.157 Goal=   None    Shift=    0.000
 Gap=     0.276 Goal=   None    Shift=    0.000
 RMSDP=5.79D-05 MaxDP=8.72D-03 DE=-2.04D-06 OVMax= 1.94D-03

 Cycle  13  Pass 1  IDiag  1:
 RMSU=  4.14D-05    CP:  9.25D-01  1.07D+00  9.00D-01  4.86D-01  1.64D+00
                    CP:  3.00D+00  3.00D+00  3.00D+00  3.00D+00  3.00D+00
                    CP:  3.00D+00  1.85D+00
 E= -732.297779033901     Delta-E=       -0.000001288164 Rises=F Damp=F
 DIIS: error= 2.12D-05 at cycle  13 NSaved=  13.
 NSaved=13 IEnMin=13 EnMin= -732.297779033901     IErMin=13 ErrMin= 2.12D-05
 ErrMax= 2.12D-05  0.00D+00 EMaxC= 1.00D-01 BMatC= 2.23D-07 BMatP= 2.75D-07
 IDIUse=1 WtCom= 1.00D+00 WtEn= 0.00D+00
 Coeff-Com:  0.773D-04-0.243D-02 0.249D-02 0.246D-01 0.455D-01-0.919D-01
 Coeff-Com: -0.159D+00 0.478D-01 0.403D+00-0.158D-02-0.106D+01 0.863D-01
 Coeff-Com:  0.170D+01
 Coeff:      0.773D-04-0.243D-02 0.249D-02 0.246D-01 0.455D-01-0.919D-01
 Coeff:     -0.159D+00 0.478D-01 0.403D+00-0.158D-02-0.106D+01 0.863D-01
 Coeff:      0.170D+01
 Gap=     0.157 Goal=   None    Shift=    0.000
 Gap=     0.276 Goal=   None    Shift=    0.000
 RMSDP=9.37D-05 MaxDP=1.42D-02 DE=-1.29D-06 OVMax= 3.11D-03

 Cycle  14  Pass 1  IDiag  1:
 RMSU=  2.17D-05    CP:  9.25D-01  1.07D+00  8.74D-01  4.54D-01  1.69D+00
                    CP:  3.00D+00  3.00D+00  3.00D+00  3.00D+00  3.00D+00
                    CP:  3.00D+00  3.00D+00  2.78D+00
 E= -732.297780868573     Delta-E=       -0.000001834672 Rises=F Damp=F
 DIIS: error= 1.81D-05 at cycle  14 NSaved=  14.
 NSaved=14 IEnMin=14 EnMin= -732.297780868573     IErMin=14 ErrMin= 1.81D-05
 ErrMax= 1.81D-05  0.00D+00 EMaxC= 1.00D-01 BMatC= 1.75D-07 BMatP= 2.23D-07
 IDIUse=1 WtCom= 1.00D+00 WtEn= 0.00D+00
 Coeff-Com:  0.550D-03-0.736D-02-0.159D-02 0.268D-01 0.105D+00-0.797D-02
 Coeff-Com: -0.288D+00-0.175D+00 0.476D+00 0.570D+00-0.742D+00-0.128D+01
 Coeff-Com:  0.346D+00 0.198D+01
 Coeff:      0.550D-03-0.736D-02-0.159D-02 0.268D-01 0.105D+00-0.797D-02
 Coeff:     -0.288D+00-0.175D+00 0.476D+00 0.570D+00-0.742D+00-0.128D+01
 Coeff:      0.346D+00 0.198D+01
 Gap=     0.157 Goal=   None    Shift=    0.000
 Gap=     0.276 Goal=   None    Shift=    0.000
 RMSDP=1.38D-04 MaxDP=1.93D-02 DE=-1.83D-06 OVMax= 4.69D-03

 Cycle  15  Pass 1  IDiag  1:
 RMSU=  1.06D-04    CP:  9.26D-01  1.07D+00  8.34D-01  4.06D-01  1.79D+00
                    CP:  3.00D+00  3.00D+00  3.00D+00  3.00D+00  3.00D+00
                    CP:  3.00D+00  3.00D+00  3.00D+00  3.00D+00
 E= -732.297783185203     Delta-E=       -0.000002316630 Rises=F Damp=F
 DIIS: error= 1.31D-05 at cycle  15 NSaved=  15.
 NSaved=15 IEnMin=15 EnMin= -732.297783185203     IErMin=15 ErrMin= 1.31D-05
 ErrMax= 1.31D-05  0.00D+00 EMaxC= 1.00D-01 BMatC= 1.05D-07 BMatP= 1.75D-07
 IDIUse=1 WtCom= 1.00D+00 WtEn= 0.00D+00
 Coeff-Com:  0.263D-03-0.168D-02-0.509D-02-0.117D-01 0.125D-01 0.100D+00
 Coeff-Com:  0.102D-01-0.184D+00-0.248D+00 0.407D+00 0.802D+00-0.921D+00
 Coeff-Com: -0.178D+01 0.114D+01 0.168D+01
 Coeff:      0.263D-03-0.168D-02-0.509D-02-0.117D-01 0.125D-01 0.100D+00
 Coeff:      0.102D-01-0.184D+00-0.248D+00 0.407D+00 0.802D+00-0.921D+00
 Coeff:     -0.178D+01 0.114D+01 0.168D+01
 Gap=     0.157 Goal=   None    Shift=    0.000
 Gap=     0.276 Goal=   None    Shift=    0.000
 RMSDP=2.29D-04 MaxDP=3.39D-02 DE=-2.32D-06 OVMax= 7.62D-03

 Cycle  16  Pass 1  IDiag  1:
 RMSU=  7.15D-05    CP:  9.27D-01  1.07D+00  7.70D-01  3.31D-01  1.94D+00
                    CP:  3.00D+00  3.00D+00  3.00D+00  3.00D+00  3.00D+00
                    CP:  3.00D+00  3.00D+00  3.00D+00  3.00D+00  2.78D+00
 E= -732.297785399215     Delta-E=       -0.000002214012 Rises=F Damp=F
 DIIS: error= 6.16D-06 at cycle  16 NSaved=  16.
 NSaved=16 IEnMin=16 EnMin= -732.297785399215     IErMin=16 ErrMin= 6.16D-06
 ErrMax= 6.16D-06  0.00D+00 EMaxC= 1.00D-01 BMatC= 3.41D-08 BMatP= 1.05D-07
 IDIUse=1 WtCom= 1.00D+00 WtEn= 0.00D+00
 Coeff-Com: -0.191D-03 0.333D-02-0.100D-02-0.176D-01-0.520D-01 0.367D-01
 Coeff-Com:  0.165D+00 0.388D-01-0.336D+00-0.159D+00 0.672D+00 0.411D+00
 Coeff-Com: -0.791D+00-0.816D+00 0.645D+00 0.120D+01
 Coeff:     -0.191D-03 0.333D-02-0.100D-02-0.176D-01-0.520D-01 0.367D-01
 Coeff:      0.165D+00 0.388D-01-0.336D+00-0.159D+00 0.672D+00 0.411D+00
 Coeff:     -0.791D+00-0.816D+00 0.645D+00 0.120D+01
 Gap=     0.157 Goal=   None    Shift=    0.000
 Gap=     0.276 Goal=   None    Shift=    0.000
 RMSDP=1.23D-04 MaxDP=1.73D-02 DE=-2.21D-06 OVMax= 4.17D-03

 Cycle  17  Pass 1  IDiag  1:
 RMSU=  7.93D-05    CP:  9.27D-01  1.07D+00  7.34D-01  2.88D-01  2.03D+00
                    CP:  3.00D+00  3.00D+00  3.00D+00  3.00D+00  3.00D+00
                    CP:  3.00D+00  3.00D+00  3.00D+00  3.00D+00  3.00D+00
                    CP:  1.54D+00
 E= -732.297785864351     Delta-E=       -0.000000465136 Rises=F Damp=F
 DIIS: error= 2.78D-06 at cycle  17 NSaved=  17.
 NSaved=17 IEnMin=17 EnMin= -732.297785864351     IErMin=17 ErrMin= 2.78D-06
 ErrMax= 2.78D-06  0.00D+00 EMaxC= 1.00D-01 BMatC= 4.55D-09 BMatP= 3.41D-08
 IDIUse=1 WtCom= 1.00D+00 WtEn= 0.00D+00
 Coeff-Com: -0.921D-04 0.110D-02 0.638D-03-0.227D-02-0.145D-01-0.976D-02
 Coeff-Com:  0.382D-01 0.390D-01-0.428D-01-0.108D+00 0.146D-01 0.251D+00
 Coeff-Com:  0.151D+00-0.416D+00-0.114D+00 0.282D+00 0.930D+00
 Coeff:     -0.921D-04 0.110D-02 0.638D-03-0.227D-02-0.145D-01-0.976D-02
 Coeff:      0.382D-01 0.390D-01-0.428D-01-0.108D+00 0.146D-01 0.251D+00
 Coeff:      0.151D+00-0.416D+00-0.114D+00 0.282D+00 0.930D+00
 Gap=     0.157 Goal=   None    Shift=    0.000
 Gap=     0.276 Goal=   None    Shift=    0.000
 RMSDP=2.53D-05 MaxDP=3.67D-03 DE=-4.65D-07 OVMax= 8.53D-04

 Cycle  18  Pass 1  IDiag  1:
 RMSU=  1.51D-06    CP:  9.27D-01  1.07D+00  7.27D-01  2.79D-01  2.04D+00
                    CP:  3.00D+00  3.00D+00  3.00D+00  3.00D+00  3.00D+00
                    CP:  3.00D+00  3.00D+00  3.00D+00  3.00D+00  3.00D+00
                    CP:  1.65D+00  1.26D+00
 E= -732.297785888593     Delta-E=       -0.000000024242 Rises=F Damp=F
 DIIS: error= 1.16D-06 at cycle  18 NSaved=  18.
 NSaved=18 IEnMin=18 EnMin= -732.297785888593     IErMin=18 ErrMin= 1.16D-06
 ErrMax= 1.16D-06  0.00D+00 EMaxC= 1.00D-01 BMatC= 1.36D-09 BMatP= 4.55D-09
 IDIUse=1 WtCom= 1.00D+00 WtEn= 0.00D+00
 Coeff-Com:  0.272D-04-0.564D-03 0.378D-03 0.375D-02 0.941D-02-0.114D-01
 Coeff-Com: -0.328D-01 0.108D-02 0.751D-01 0.111D-01-0.163D+00-0.412D-01
 Coeff-Com:  0.254D+00 0.761D-01-0.183D+00-0.253D+00 0.265D+00 0.989D+00
 Coeff:      0.272D-04-0.564D-03 0.378D-03 0.375D-02 0.941D-02-0.114D-01
 Coeff:     -0.328D-01 0.108D-02 0.751D-01 0.111D-01-0.163D+00-0.412D-01
 Coeff:      0.254D+00 0.761D-01-0.183D+00-0.253D+00 0.265D+00 0.989D+00
 Gap=     0.157 Goal=   None    Shift=    0.000
 Gap=     0.276 Goal=   None    Shift=    0.000
 RMSDP=7.10D-06 MaxDP=9.66D-04 DE=-2.42D-08 OVMax= 2.43D-04

 Cycle  19  Pass 1  IDiag  1:
 RMSU=  6.77D-07    CP:  9.27D-01  1.07D+00  7.26D-01  2.76D-01  2.05D+00
                    CP:  3.00D+00  3.00D+00  3.00D+00  3.00D+00  3.00D+00
                    CP:  3.00D+00  3.00D+00  3.00D+00  3.00D+00  3.00D+00
                    CP:  1.68D+00  1.34D+00  1.13D+00
 E= -732.297785892315     Delta-E=       -0.000000003723 Rises=F Damp=F
 DIIS: error= 7.76D-07 at cycle  19 NSaved=  19.
 NSaved=19 IEnMin=19 EnMin= -732.297785892315     IErMin=19 ErrMin= 7.76D-07
 ErrMax= 7.76D-07  0.00D+00 EMaxC= 1.00D-01 BMatC= 4.41D-10 BMatP= 1.36D-09
 IDIUse=1 WtCom= 1.00D+00 WtEn= 0.00D+00
 Coeff-Com:  0.125D-04-0.168D-03-0.362D-04 0.613D-03 0.243D-02 0.628D-03
 Coeff-Com: -0.714D-02-0.449D-02 0.112D-01 0.132D-01-0.168D-01-0.355D-01
 Coeff-Com:  0.132D-01 0.475D-01 0.138D-02-0.637D-01-0.622D-01 0.121D+00
 Coeff-Com:  0.979D+00
 Coeff:      0.125D-04-0.168D-03-0.362D-04 0.613D-03 0.243D-02 0.628D-03
 Coeff:     -0.714D-02-0.449D-02 0.112D-01 0.132D-01-0.168D-01-0.355D-01
 Coeff:      0.132D-01 0.475D-01 0.138D-02-0.637D-01-0.622D-01 0.121D+00
 Coeff:      0.979D+00
 Gap=     0.157 Goal=   None    Shift=    0.000
 Gap=     0.276 Goal=   None    Shift=    0.000
 RMSDP=1.03D-06 MaxDP=1.76D-04 DE=-3.72D-09 OVMax= 3.11D-05

 Cycle  20  Pass 1  IDiag  1:
 RMSU=  3.49D-07    CP:  9.27D-01  1.07D+00  7.25D-01  2.76D-01  2.05D+00
                    CP:  3.00D+00  3.00D+00  3.00D+00  3.00D+00  3.00D+00
                    CP:  3.00D+00  3.00D+00  3.00D+00  3.00D+00  3.00D+00
                    CP:  1.68D+00  1.35D+00  1.16D+00  1.55D+00
 E= -732.297785893442     Delta-E=       -0.000000001127 Rises=F Damp=F
 DIIS: error= 7.69D-07 at cycle  20 NSaved=  20.
 NSaved=20 IEnMin=20 EnMin= -732.297785893442     IErMin=20 ErrMin= 7.69D-07
 ErrMax= 7.69D-07  0.00D+00 EMaxC= 1.00D-01 BMatC= 3.54D-10 BMatP= 4.41D-10
 IDIUse=1 WtCom= 1.00D+00 WtEn= 0.00D+00
 Coeff-Com: -0.283D-05 0.926D-04-0.140D-03-0.854D-03-0.169D-02 0.327D-02
 Coeff-Com:  0.630D-02-0.259D-02-0.167D-01 0.353D-02 0.408D-01-0.383D-02
 Coeff-Com: -0.726D-01-0.129D-02 0.613D-01 0.473D-01-0.120D+00-0.280D+00
 Coeff-Com:  0.385D+00 0.952D+00
 Coeff:     -0.283D-05 0.926D-04-0.140D-03-0.854D-03-0.169D-02 0.327D-02
 Coeff:      0.630D-02-0.259D-02-0.167D-01 0.353D-02 0.408D-01-0.383D-02
 Coeff:     -0.726D-01-0.129D-02 0.613D-01 0.473D-01-0.120D+00-0.280D+00
 Coeff:      0.385D+00 0.952D+00
 Gap=     0.157 Goal=   None    Shift=    0.000
 Gap=     0.276 Goal=   None    Shift=    0.000
 RMSDP=7.41D-07 MaxDP=1.13D-04 DE=-1.13D-09 OVMax= 3.29D-05

 Cycle  21  Pass 1  IDiag  1:
 Restarting incremental Fock formation.
 E= -732.297785894572     Delta-E=       -0.000000001130 Rises=F Damp=F
 DIIS: error= 7.42D-07 at cycle  21 NSaved=  20.
 NSaved=20 IEnMin=20 EnMin= -732.297785894572     IErMin=20 ErrMin= 7.42D-07
 ErrMax= 7.42D-07  0.00D+00 EMaxC= 1.00D-01 BMatC= 2.89D-10 BMatP= 3.54D-10
 IDIUse=1 WtCom= 1.00D+00 WtEn= 0.00D+00
 Coeff-Com:  0.265D-04-0.147D-04-0.202D-03-0.450D-03 0.124D-03 0.278D-02
 Coeff-Com: -0.431D-05-0.436D-02-0.207D-02 0.806D-02 0.100D-01-0.122D-01
 Coeff-Com: -0.131D-01 0.432D-02 0.247D-01 0.122D-01-0.739D-01-0.429D+00
 Coeff-Com:  0.838D-01 0.139D+01
 Coeff:      0.265D-04-0.147D-04-0.202D-03-0.450D-03 0.124D-03 0.278D-02
 Coeff:     -0.431D-05-0.436D-02-0.207D-02 0.806D-02 0.100D-01-0.122D-01
 Coeff:     -0.131D-01 0.432D-02 0.247D-01 0.122D-01-0.739D-01-0.429D+00
 Coeff:      0.838D-01 0.139D+01
 Gap=     0.157 Goal=   None    Shift=    0.000
 Gap=     0.276 Goal=   None    Shift=    0.000
 RMSDP=9.07D-07 MaxDP=1.02D-04 DE=-1.13D-09 OVMax= 4.63D-05

 Cycle  22  Pass 1  IDiag  1:
 RMSU=  8.88D-07    CP:  1.00D+00
 E= -732.297785896072     Delta-E=       -0.000000001500 Rises=F Damp=F
 DIIS: error= 7.02D-07 at cycle  22 NSaved=  20.
 NSaved=20 IEnMin=20 EnMin= -732.297785896072     IErMin=20 ErrMin= 7.02D-07
 ErrMax= 7.02D-07  0.00D+00 EMaxC= 1.00D-01 BMatC= 2.48D-10 BMatP= 2.89D-10
 IDIUse=1 WtCom= 1.00D+00 WtEn= 0.00D+00
 Coeff-Com:  0.505D-04 0.173D-03 0.990D-04-0.132D-02-0.145D-02 0.214D-02
 Coeff-Com:  0.445D-02-0.381D-02-0.138D-01 0.535D-02 0.274D-01-0.106D-02
 Coeff-Com: -0.246D-01-0.196D-01 0.486D-01 0.137D+00-0.182D+00-0.601D+00
 Coeff-Com: -0.155D+00 0.178D+01
 Coeff:      0.505D-04 0.173D-03 0.990D-04-0.132D-02-0.145D-02 0.214D-02
 Coeff:      0.445D-02-0.381D-02-0.138D-01 0.535D-02 0.274D-01-0.106D-02
 Coeff:     -0.246D-01-0.196D-01 0.486D-01 0.137D+00-0.182D+00-0.601D+00
 Coeff:     -0.155D+00 0.178D+01
 Gap=     0.157 Goal=   None    Shift=    0.000
 Gap=     0.276 Goal=   None    Shift=    0.000
 RMSDP=1.40D-06 MaxDP=1.66D-04 DE=-1.50D-09 OVMax= 6.95D-05

 Cycle  23  Pass 1  IDiag  1:
 RMSU=  2.64D-07    CP:  1.00D+00  2.51D+00
 E= -732.297785898126     Delta-E=       -0.000000002054 Rises=F Damp=F
 DIIS: error= 6.30D-07 at cycle  23 NSaved=  20.
 NSaved=20 IEnMin=20 EnMin= -732.297785898126     IErMin=20 ErrMin= 6.30D-07
 ErrMax= 6.30D-07  0.00D+00 EMaxC= 1.00D-01 BMatC= 2.10D-10 BMatP= 2.48D-10
 IDIUse=1 WtCom= 1.00D+00 WtEn= 0.00D+00
 Coeff-Com:  0.108D-04-0.447D-04 0.146D-02-0.287D-02 0.499D-03 0.183D-02
 Coeff-Com:  0.364D-02-0.232D-02-0.201D-01 0.197D-02 0.279D-01 0.361D-02
 Coeff-Com: -0.375D-01-0.472D-01 0.126D+00 0.921D+00-0.376D+00-0.305D+01
 Coeff-Com:  0.129D+01 0.216D+01
 Coeff:      0.108D-04-0.447D-04 0.146D-02-0.287D-02 0.499D-03 0.183D-02
 Coeff:      0.364D-02-0.232D-02-0.201D-01 0.197D-02 0.279D-01 0.361D-02
 Coeff:     -0.375D-01-0.472D-01 0.126D+00 0.921D+00-0.376D+00-0.305D+01
 Coeff:      0.129D+01 0.216D+01
 Gap=     0.157 Goal=   None    Shift=    0.000
 Gap=     0.276 Goal=   None    Shift=    0.000
 RMSDP=3.22D-06 MaxDP=3.42D-04 DE=-2.05D-09 OVMax= 1.61D-04

 Cycle  24  Pass 1  IDiag  1:
 RMSU=  2.69D-06    CP:  1.00D+00  3.00D+00  2.86D+00
 E= -732.297785902005     Delta-E=       -0.000000003879 Rises=F Damp=F
 DIIS: error= 4.79D-07 at cycle  24 NSaved=  20.
 NSaved=20 IEnMin=20 EnMin= -732.297785902005     IErMin=20 ErrMin= 4.79D-07
 ErrMax= 4.79D-07  0.00D+00 EMaxC= 1.00D-01 BMatC= 1.22D-10 BMatP= 2.10D-10
 IDIUse=1 WtCom= 1.00D+00 WtEn= 0.00D+00
 Coeff-Com: -0.162D-04 0.834D-03-0.397D-03-0.161D-02-0.126D-02 0.340D-02
 Coeff-Com:  0.112D-01-0.108D-01-0.235D-01 0.149D-01 0.165D-01 0.104D-01
 Coeff-Com: -0.777D-01-0.117D+00 0.511D+00 0.476D+00-0.375D+00-0.170D+01
 Coeff-Com:  0.228D+00 0.204D+01
 Coeff:     -0.162D-04 0.834D-03-0.397D-03-0.161D-02-0.126D-02 0.340D-02
 Coeff:      0.112D-01-0.108D-01-0.235D-01 0.149D-01 0.165D-01 0.104D-01
 Coeff:     -0.777D-01-0.117D+00 0.511D+00 0.476D+00-0.375D+00-0.170D+01
 Coeff:      0.228D+00 0.204D+01
 Gap=     0.157 Goal=   None    Shift=    0.000
 Gap=     0.276 Goal=   None    Shift=    0.000
 RMSDP=4.25D-06 MaxDP=4.52D-04 DE=-3.88D-09 OVMax= 2.13D-04

 Cycle  25  Pass 1  IDiag  1:
 RMSU=  7.99D-07    CP:  1.00D+00  3.00D+00  3.00D+00  2.52D+00
 E= -732.297785905278     Delta-E=       -0.000000003273 Rises=F Damp=F
 DIIS: error= 2.46D-07 at cycle  25 NSaved=  20.
 NSaved=20 IEnMin=20 EnMin= -732.297785905278     IErMin=20 ErrMin= 2.46D-07
 ErrMax= 2.46D-07  0.00D+00 EMaxC= 1.00D-01 BMatC= 5.21D-11 BMatP= 1.22D-10
 IDIUse=1 WtCom= 1.00D+00 WtEn= 0.00D+00
 Coeff-Com: -0.164D-03 0.164D-02-0.137D-02-0.217D-02-0.731D-03 0.799D-02
 Coeff-Com:  0.342D-02-0.150D-01-0.246D-02 0.553D-02 0.292D-01-0.229D-01
 Coeff-Com: -0.150D+00-0.168D+00 0.471D+00 0.151D+01-0.174D+01-0.117D+01
 Coeff-Com:  0.117D+01 0.107D+01
 Coeff:     -0.164D-03 0.164D-02-0.137D-02-0.217D-02-0.731D-03 0.799D-02
 Coeff:      0.342D-02-0.150D-01-0.246D-02 0.553D-02 0.292D-01-0.229D-01
 Coeff:     -0.150D+00-0.168D+00 0.471D+00 0.151D+01-0.174D+01-0.117D+01
 Coeff:      0.117D+01 0.107D+01
 Gap=     0.157 Goal=   None    Shift=    0.000
 Gap=     0.276 Goal=   None    Shift=    0.000
 RMSDP=3.09D-06 MaxDP=3.50D-04 DE=-3.27D-09 OVMax= 1.52D-04

 Cycle  26  Pass 1  IDiag  1:
 RMSU=  1.65D-06    CP:  1.00D+00  3.00D+00  3.00D+00  3.00D+00  1.85D+00
 E= -732.297785906285     Delta-E=       -0.000000001007 Rises=F Damp=F
 DIIS: error= 9.34D-08 at cycle  26 NSaved=  20.
 NSaved=20 IEnMin=20 EnMin= -732.297785906285     IErMin=20 ErrMin= 9.34D-08
 ErrMax= 9.34D-08  0.00D+00 EMaxC= 1.00D-01 BMatC= 9.08D-12 BMatP= 5.21D-11
 IDIUse=1 WtCom= 1.00D+00 WtEn= 0.00D+00
 Coeff-Com:  0.245D-03-0.887D-04 0.283D-03-0.522D-03-0.718D-03 0.118D-02
 Coeff-Com:  0.220D-02-0.653D-03-0.435D-02 0.155D-02 0.101D-01-0.629D-02
 Coeff-Com: -0.108D+00-0.435D-01 0.351D+00 0.123D+00-0.332D+00-0.320D+00
 Coeff-Com:  0.305D+00 0.102D+01
 Coeff:      0.245D-03-0.887D-04 0.283D-03-0.522D-03-0.718D-03 0.118D-02
 Coeff:      0.220D-02-0.653D-03-0.435D-02 0.155D-02 0.101D-01-0.629D-02
 Coeff:     -0.108D+00-0.435D-01 0.351D+00 0.123D+00-0.332D+00-0.320D+00
 Coeff:      0.305D+00 0.102D+01
 Gap=     0.157 Goal=   None    Shift=    0.000
 Gap=     0.276 Goal=   None    Shift=    0.000
 RMSDP=1.00D-06 MaxDP=1.03D-04 DE=-1.01D-09 OVMax= 5.08D-05

 Cycle  27  Pass 1  IDiag  1:
 RMSU=  8.36D-08    CP:  1.00D+00  3.00D+00  3.00D+00  3.00D+00  2.08D+00
                    CP:  1.59D+00
 E= -732.297785906376     Delta-E=       -0.000000000092 Rises=F Damp=F
 DIIS: error= 4.08D-08 at cycle  27 NSaved=  20.
 NSaved=20 IEnMin=20 EnMin= -732.297785906376     IErMin=20 ErrMin= 4.08D-08
 ErrMax= 4.08D-08  0.00D+00 EMaxC= 1.00D-01 BMatC= 2.18D-12 BMatP= 9.08D-12
 IDIUse=1 WtCom= 1.00D+00 WtEn= 0.00D+00
 Coeff-Com: -0.966D-05-0.308D-04-0.259D-03 0.461D-04 0.241D-03 0.977D-03
 Coeff-Com: -0.461D-03-0.119D-02-0.151D-03 0.555D-02 0.507D-02-0.213D-01
 Coeff-Com: -0.598D-01-0.555D-02 0.223D+00-0.113D-01-0.245D+00-0.920D-02
 Coeff-Com:  0.320D+00 0.799D+00
 Coeff:     -0.966D-05-0.308D-04-0.259D-03 0.461D-04 0.241D-03 0.977D-03
 Coeff:     -0.461D-03-0.119D-02-0.151D-03 0.555D-02 0.507D-02-0.213D-01
 Coeff:     -0.598D-01-0.555D-02 0.223D+00-0.113D-01-0.245D+00-0.920D-02
 Coeff:      0.320D+00 0.799D+00
 Gap=     0.157 Goal=   None    Shift=    0.000
 Gap=     0.276 Goal=   None    Shift=    0.000
 RMSDP=1.29D-07 MaxDP=1.58D-05 DE=-9.19D-11 OVMax= 6.58D-06

 Error on total polarization charges =  0.04314
 SCF Done:  E(UM062X) =  -732.297785906     A.U. after   27 cycles
            NFock= 27  Conv=0.13D-06     -V/T= 2.0639
 <Sx>= 0.0000 <Sy>= 0.0000 <Sz>= 1.5000 <S**2>= 4.7663 S= 1.7397
 <L.S>=  0.00000000000    
 KE= 6.882974781556D+02 PE=-3.343557333769D+03 EE= 1.080810878378D+03
 SMD-CDS (non-electrostatic) energy       (kcal/mol) =       6.83
 (included in total energy above)
 Annihilation of the first spin contaminant:
 S**2 before annihilation     4.7663,   after     3.7749
 Leave Link  502 at Sat May 27 00:52:47 2023, MaxMem=  2684354560 cpu:            1275.5 elap:             128.0
 (Enter /home/xut/apps/g16/l701.exe)
 ... and contract with generalized density number  0.
 Compute integral first derivatives.
   1 Symmetry operations used in ECPInt.
 ECPInt:  NShTT=    6105 NPrTT=   23469 LenC2=    5813 LenP2D=   15882.
 LDataN:  DoStor=T MaxTD1= 5 Len=  102
 D1PCM: PCM CHGder 1st derivatives, ID1Alg=3 FixD1E=F DoIter=F DoCFld=F I1PDM=0.
 GePol: Maximum number of non-zero 1st derivatives   =     187
 Leave Link  701 at Sat May 27 00:52:48 2023, MaxMem=  2684354560 cpu:              11.7 elap:               1.2
 (Enter /home/xut/apps/g16/l702.exe)
 L702 exits ... SP integral derivatives will be done elsewhere.
 Leave Link  702 at Sat May 27 00:52:48 2023, MaxMem=  2684354560 cpu:               0.1 elap:               0.0
 (Enter /home/xut/apps/g16/l703.exe)
 Integral derivatives from FoFJK, PRISM(SPDF).
 Compute integral first derivatives, UseDBF=F ICtDFT=           0.
 Calling FoFJK, ICntrl=      2127 FMM=F ISym2X=0 I1Cent= 0 IOpClX= 1 NMat=1 NMatS=1 NMatT=0.
 FoFJK:  IHMeth= 1 ICntrl=    2127 DoSepK=F KAlg= 0 I1Cent=           0 FoldK=F
 IRaf=         0 NMat=       1 IRICut=       1 DoRegI=T DoRafI=F ISym2E= 0 IDoP0=0 IntGTp=1.
 FoFCou: FMM=F IPFlag=           0 FMFlag=      100000 FMFlg1=         800
         NFxFlg=           0 DoJE=F BraDBF=F KetDBF=F FulRan=T
         wScrn=  0.000000 ICntrl=      2127 IOpCl=  1 I1Cent=           0 NGrid=           0
         NMat0=    1 NMatS0=      1 NMatT0=    0 NMatD0=    1 NMtDS0=    0 NMtDT0=    0
 Symmetry not used in FoFCou.
 Leave Link  703 at Sat May 27 00:52:59 2023, MaxMem=  2684354560 cpu:             106.3 elap:              10.7
 (Enter /home/xut/apps/g16/l716.exe)
 Dipole        =-1.17535682D+01 1.42044469D+00 2.03185366D-01
 ***** Axes restored to original set *****
 -------------------------------------------------------------------
 Center     Atomic                   Forces (Hartrees/Bohr)
 Number     Number              X              Y              Z
 -------------------------------------------------------------------
      1        6          -0.001610116    0.004422949    0.000710544
      2        6           0.000810597   -0.009464442   -0.001676992
      3        6          -0.001011640    0.003575208   -0.000784616
      4        6           0.003030848   -0.000940747   -0.001532833
      5        6          -0.000808218   -0.002134130    0.002263819
      6        6          -0.005215863   -0.009196988    0.004075500
      7        1           0.000192734    0.000950965   -0.000147819
      8        1           0.000572907    0.002350041    0.000203570
      9        6           0.003073601    0.008420256   -0.000078727
     10        8           0.005626970   -0.008218063    0.000321794
     11        1          -0.001412563   -0.001235695    0.000399987
     12        8          -0.008651849   -0.001512527   -0.000184347
     13        8          -0.000209641    0.001824460    0.001827486
     14        1          -0.000741775   -0.001101330   -0.002313973
     15        8           0.007656105    0.013317235   -0.006388009
     16        1           0.000516675   -0.000507075    0.004542259
     17        8          -0.000888614    0.000234270   -0.006561475
     18        1           0.000371201   -0.000074917    0.004701413
     19       24          -0.001301360   -0.000709470    0.000622417
 -------------------------------------------------------------------
 Cartesian Forces:  Max     0.013317235 RMS     0.004037403
 Leave Link  716 at Sat May 27 00:52:59 2023, MaxMem=  2684354560 cpu:               0.2 elap:               0.0
 (Enter /home/xut/apps/g16/l103.exe)

 GradGradGradGradGradGradGradGradGradGradGradGradGradGradGradGradGradGrad
 Berny optimization.
 Using GEDIIS/GDIIS optimizer.
 FormGI is forming the generalized inverse of G from B-inverse, IUseBI=4.
 Internal  Forces:  Max     0.015200986 RMS     0.002856549
 Search for a local minimum.
 Step number   3 out of a maximum of   94
 All quantities printed in internal units (Hartrees-Bohrs-Radians)
 RMS Force = .28565D-02 SwitMx=.10000D-02 MixMth= 1
 Mixed Optimization -- RFO/linear search
 Update second derivatives using D2CorX and points    2    3
 DE= -1.15D-02 DEPred=-1.37D-02 R= 8.40D-01
 TightC=F SS=  1.41D+00  RLast= 5.17D-01 DXNew= 8.4853D-01 1.5509D+00
 Trust test= 8.40D-01 RLast= 5.17D-01 DXMaxT set to 8.49D-01
 ITU=  1  1  0
 Use linear search instead of GDIIS.
     Eigenvalues ---    0.00237   0.01154   0.01233   0.01296   0.01349
     Eigenvalues ---    0.01535   0.01746   0.01859   0.01944   0.02068
     Eigenvalues ---    0.02094   0.02102   0.02155   0.02290   0.02409
     Eigenvalues ---    0.02997   0.12415   0.15162   0.16000   0.16000
     Eigenvalues ---    0.16000   0.16113   0.16349   0.22178   0.23343
     Eigenvalues ---    0.23538   0.24068   0.24992   0.24996   0.24998
     Eigenvalues ---    0.24999   0.25329   0.27016   0.28709   0.36869
     Eigenvalues ---    0.37264   0.37478   0.41118   0.41861   0.43378
     Eigenvalues ---    0.44668   0.45343   0.45841   0.46347   0.52840
     Eigenvalues ---    0.55454   0.55473   0.55484   0.56141   0.66889
     Eigenvalues ---    0.83092
 RFO step:  Lambda=-4.95585050D-03 EMin= 2.36719703D-03
 Quartic linear search produced a step of  0.08545.
 Iteration  1 RMS(Cart)=  0.06277388 RMS(Int)=  0.00682640
 Iteration  2 RMS(Cart)=  0.00663638 RMS(Int)=  0.00011356
 Iteration  3 RMS(Cart)=  0.00010559 RMS(Int)=  0.00002918
 Iteration  4 RMS(Cart)=  0.00000003 RMS(Int)=  0.00002918
 ITry= 1 IFail=0 DXMaxC= 2.90D-01 DCOld= 1.00D+10 DXMaxT= 8.49D-01 DXLimC= 3.00D+00 Rises=F
 Variable       Old X    -DE/DX   Delta X   Delta X   Delta X     New X
                                 (Linear)    (Quad)   (Total)
    R1        2.61917   0.00607   0.00291   0.01144   0.01435   2.63352
    R2        2.73243   0.00292   0.00354   0.00720   0.01075   2.74318
    R3        2.47353   0.00045  -0.00815  -0.00077  -0.00893   2.46460
    R4        2.61122  -0.00272  -0.00251  -0.00555  -0.00807   2.60315
    R5        2.04553  -0.00027   0.00037  -0.00007   0.00031   2.04584
    R6        2.69768   0.00094   0.00158   0.00232   0.00389   2.70157
    R7        2.85555   0.00294  -0.00107   0.00917   0.00810   2.86365
    R8        2.57085  -0.00170  -0.00124  -0.00618  -0.00742   2.56343
    R9        2.05561  -0.00158   0.00139  -0.00426  -0.00287   2.05273
   R10        2.68718   0.00141   0.00223   0.00288   0.00512   2.69230
   R11        2.56812  -0.00224  -0.00346  -0.00812  -0.01158   2.55654
   R12        2.41672   0.01520  -0.00988   0.03541   0.02553   2.44225
   R13        2.48948   0.01015   0.00200   0.01499   0.01700   2.50647
   R14        2.26851   0.00876  -0.00337   0.00979   0.00642   2.27493
   R15        1.82786  -0.00164   0.00033  -0.00278  -0.00244   1.82542
   R16        1.84138  -0.00213   0.00075  -0.00351  -0.00275   1.83862
   R17        4.00214  -0.00030   0.00679  -0.00418   0.00261   4.00474
   R18        1.85079  -0.00175   0.00117  -0.00279  -0.00162   1.84917
   R19        1.84136  -0.00165   0.00103  -0.00290  -0.00187   1.83950
    A1        2.09879  -0.00132  -0.00016  -0.00375  -0.00390   2.09489
    A2        2.19739   0.00039   0.00454   0.00088   0.00541   2.20281
    A3        1.98689   0.00093  -0.00439   0.00292  -0.00148   1.98541
    A4        2.07083   0.00171  -0.00045   0.00740   0.00694   2.07777
    A5        2.10133  -0.00190  -0.00008  -0.01019  -0.01027   2.09106
    A6        2.11102   0.00019   0.00053   0.00278   0.00331   2.11432
    A7        2.13090  -0.00094   0.00089  -0.00447  -0.00361   2.12729
    A8        2.01745  -0.00148  -0.00185  -0.00696  -0.00882   2.00864
    A9        2.13477   0.00242   0.00095   0.01132   0.01226   2.14702
   A10        2.09450   0.00029   0.00090  -0.00138  -0.00049   2.09401
   A11        2.13634   0.00166   0.00048   0.01301   0.01350   2.14983
   A12        2.05235  -0.00195  -0.00138  -0.01163  -0.01301   2.03934
   A13        2.08778   0.00301  -0.00027   0.01185   0.01159   2.09936
   A14        2.13226  -0.00456   0.00334  -0.02030  -0.01697   2.11529
   A15        2.06281   0.00155  -0.00310   0.00833   0.00522   2.06802
   A16        2.08344  -0.00275  -0.00092  -0.00968  -0.01058   2.07286
   A17        2.12488   0.00330   0.00123   0.01302   0.01424   2.13912
   A18        2.07463  -0.00054  -0.00032  -0.00328  -0.00362   2.07101
   A19        2.08260   0.00289  -0.00270   0.01411   0.01140   2.09401
   A20        2.10250  -0.00005   0.00239  -0.00236   0.00002   2.10252
   A21        2.09808  -0.00284   0.00031  -0.01176  -0.01146   2.08662
   A22        2.00787   0.00197  -0.00498   0.01384   0.00885   2.01672
   A23        1.97575   0.00206   0.00317   0.00979   0.01286   1.98860
   A24        2.21161  -0.00424   0.00064  -0.02038  -0.01984   2.19177
   A25        2.04937   0.00204  -0.00140   0.01076   0.00925   2.05863
   A26        1.97822   0.00097   0.00662   0.00201   0.00864   1.98686
   A27        1.96186   0.00075   0.00616   0.00038   0.00654   1.96840
    D1       -0.00098   0.00018  -0.00001   0.00551   0.00553   0.00455
    D2        3.13587   0.00005  -0.00029   0.00124   0.00099   3.13686
    D3       -3.12530   0.00009   0.00103   0.00174   0.00282  -3.12249
    D4        0.01154  -0.00004   0.00075  -0.00252  -0.00172   0.00982
    D5       -0.01172  -0.00015  -0.00050  -0.00608  -0.00657  -0.01829
    D6       -3.12987  -0.00021   0.00061  -0.00903  -0.00843  -3.13829
    D7        3.11458  -0.00007  -0.00140  -0.00276  -0.00411   3.11047
    D8       -0.00357  -0.00013  -0.00029  -0.00571  -0.00597  -0.00954
    D9       -0.28843   0.00388   0.01654   0.20911   0.22566  -0.06277
   D10        2.86947   0.00382   0.01752   0.20562   0.22313   3.09260
   D11        0.00712  -0.00007   0.00029  -0.00151  -0.00123   0.00590
   D12        3.13677  -0.00027  -0.00021  -0.01182  -0.01197   3.12480
   D13       -3.12969   0.00006   0.00057   0.00282   0.00341  -3.12629
   D14       -0.00005  -0.00013   0.00007  -0.00749  -0.00734  -0.00739
   D15       -0.00020  -0.00004  -0.00003  -0.00200  -0.00204  -0.00223
   D16       -3.13863  -0.00013   0.00033  -0.00552  -0.00524   3.13932
   D17       -3.12904   0.00020   0.00051   0.00914   0.00972  -3.11932
   D18        0.01572   0.00011   0.00087   0.00562   0.00652   0.02224
   D19       -3.12798   0.00048   0.00066   0.05161   0.05230  -3.07568
   D20        0.01188   0.00035   0.00058   0.04368   0.04427   0.05615
   D21        0.00163   0.00026   0.00016   0.04115   0.04130   0.04294
   D22        3.14149   0.00013   0.00008   0.03322   0.03327  -3.10842
   D23       -0.01277   0.00001  -0.00050   0.00121   0.00070  -0.01207
   D24       -3.12564   0.00012   0.00097   0.00592   0.00689  -3.11875
   D25        3.12581   0.00010  -0.00085   0.00461   0.00375   3.12956
   D26        0.01294   0.00021   0.00062   0.00932   0.00994   0.02288
   D27        0.01859   0.00007   0.00075   0.00268   0.00344   0.02203
   D28        3.13741   0.00018  -0.00032   0.00577   0.00548  -3.14030
   D29        3.13260  -0.00014  -0.00061  -0.00232  -0.00296   3.12964
   D30       -0.03176  -0.00003  -0.00168   0.00077  -0.00092  -0.03268
   D31       -2.72424  -0.00124  -0.00698  -0.06921  -0.07619  -2.80043
   D32        0.08331  -0.00117   0.00005  -0.06573  -0.06565   0.01765
   D33        0.44568  -0.00116  -0.00555  -0.06462  -0.07021   0.37547
   D34       -3.02996  -0.00109   0.00148  -0.06115  -0.05967  -3.08964
   D35       -0.21746   0.00365   0.01934   0.19535   0.21470  -0.00276
   D36        2.94746   0.00362   0.02045   0.19250   0.21294  -3.12278
   D37        0.00306   0.00021   0.00018   0.00418   0.00438   0.00744
   D38       -3.13680   0.00034   0.00026   0.01208   0.01233  -3.12448
         Item               Value     Threshold  Converged?
 Maximum Force            0.015201     0.000450     NO 
 RMS     Force            0.002857     0.000300     NO 
 Maximum Displacement     0.289537     0.001800     NO 
 RMS     Displacement     0.065894     0.001200     NO 
 Predicted change in Energy=-3.079561D-03
 Lowest energy point so far.  Saving SCF results.
 GradGradGradGradGradGradGradGradGradGradGradGradGradGradGradGradGradGrad

 Leave Link  103 at Sat May 27 00:52:59 2023, MaxMem=  2684354560 cpu:               0.2 elap:               0.0
 (Enter /home/xut/apps/g16/l202.exe)
                          Input orientation:                          
 ---------------------------------------------------------------------
 Center     Atomic      Atomic             Coordinates (Angstroms)
 Number     Number       Type             X           Y           Z
 ---------------------------------------------------------------------
      1          6           0       -1.597783    1.681950   -0.029365
      2          6           0       -2.198651    0.424807   -0.003526
      3          6           0       -1.400576   -0.697228    0.037630
      4          6           0        0.026086   -0.608675    0.061739
      5          6           0        0.630259    0.605692    0.041530
      6          6           0       -0.150665    1.795788   -0.018539
      7          1           0       -3.278248    0.344151   -0.007260
      8          1           0        0.675174   -1.478993    0.096282
      9          6           0       -2.146977   -2.015141    0.086201
     10          8           0       -1.475679   -3.153038    0.203684
     11          1           0       -0.515222   -3.066298    0.259325
     12          8           0       -3.349237   -2.038170    0.028939
     13          8           0        1.978473    0.717639    0.037137
     14          1           0        2.303107    1.590002    0.320407
     15          8           0        0.457537    2.935949   -0.037783
     16          1           0       -0.146021    3.705777   -0.062570
     17          8           0       -2.215026    2.830690   -0.048677
     18          1           0       -3.182663    2.737830   -0.099672
     19         24           0        3.349867   -0.898004    0.029337
 ---------------------------------------------------------------------
                    Distance matrix (angstroms):
                    1          2          3          4          5
     1  C    0.000000
     2  C    1.393599   0.000000
     3  C    2.388277   1.377527   0.000000
     4  C    2.809309   2.453936   1.429611   0.000000
     5  C    2.475384   2.835044   2.412862   1.356510   0.000000
     6  C    1.451629   2.464561   2.789366   2.412287   1.424703
     7  H    2.148059   1.082612   2.147589   3.439660   3.917551
     8  H    3.895341   3.448664   2.218858   1.086260   2.085887
     9  C    3.739445   2.442145   1.515377   2.588619   3.818874
    10  O    4.842141   3.656036   2.462563   2.957909   4.311533
    11  H    4.878641   3.884693   2.538797   2.524275   3.852671
    12  O    4.112211   2.718669   2.365477   3.665697   4.777714
    13  O    3.704582   4.187573   3.663308   2.360409   1.352862
    14  H    3.917619   4.661377   4.362184   3.175833   1.960882
    15  O    2.407681   3.655454   4.081452   3.572173   2.337995
    16  H    2.490902   3.870599   4.579345   4.319673   3.197495
    17  O    1.304211   2.406362   3.621738   4.106581   3.613087
    18  H    1.905694   2.515472   3.872249   4.639098   4.370849
    19  Cr   5.580220   5.704118   4.754691   3.336507   3.107655
                    6          7          8          9         10
     6  C    0.000000
     7  H    3.448065   0.000000
     8  H    3.379257   4.354781   0.000000
     9  C    4.303419   2.618161   2.872645   0.000000
    10  O    5.127955   3.940061   2.727660   1.326368   0.000000
    11  H    4.883645   4.397333   1.990770   1.948724   0.965970
    12  O    4.993231   2.383653   4.063631   1.203843   2.187163
    13  O    2.387202   5.270159   2.554854   4.948720   5.190477
    14  H    2.485604   5.728091   3.481254   5.731941   6.065416
    15  O    1.292381   4.546915   4.422335   5.595727   6.393074
    16  H    1.910502   4.595044   5.251803   6.062579   6.991582
    17  O    2.309441   2.704632   5.191111   4.848186   6.034511
    18  H    3.176010   2.397369   5.718645   4.868052   6.140696
    19  Cr   4.417299   6.743604   2.737885   5.609503   5.329303
                   11         12         13         14         15
    11  H    0.000000
    12  O    3.023535   0.000000
    13  O    4.537187   5.998254   0.000000
    14  H    5.443146   6.722914   0.972957   0.000000
    15  O    6.087816   6.264012   2.690680   2.312142   0.000000
    16  H    6.789766   6.577377   3.667750   3.259050   0.978536
    17  O    6.144808   4.999826   4.696572   4.699899   2.674658
    18  H    6.397814   4.780635   5.544115   5.620289   3.646113
    19  Cr   4.437715   6.795438   2.119218   2.714886   4.803048
                   16         17         18         19
    16  H    0.000000
    17  O    2.246497   0.000000
    18  H    3.187395   0.973419   0.000000
    19  Cr   5.781391   6.699051   7.477291   0.000000
 Stoichiometry    C7H6CrO5(3+,4)
 Framework group  C1[X(C7H6CrO5)]
 Deg. of freedom    51
 Full point group                 C1      NOp   1
 RotChk:  IX=2 Diff= 3.16D-02
 Largest Abelian subgroup         C1      NOp   1
 Largest concise Abelian subgroup C1      NOp   1
                         Standard orientation:                         
 ---------------------------------------------------------------------
 Center     Atomic      Atomic             Coordinates (Angstroms)
 Number     Number       Type             X           Y           Z
 ---------------------------------------------------------------------
      1          6           0        1.618241    1.651912    0.012832
      2          6           0        2.192763    0.382287    0.022488
      3          6           0        1.371437   -0.723578    0.014295
      4          6           0       -0.053108   -0.606016   -0.010982
      5          6           0       -0.631833    0.620768   -0.025036
      6          6           0        0.173792    1.795550    0.000127
      7          1           0        3.270451    0.279272    0.027503
      8          1           0       -0.720228   -1.463239   -0.019927
      9          6           0        2.090160   -2.057622    0.002833
     10          8           0        1.395134   -3.184169   -0.081323
     11          1           0        0.436606   -3.079047   -0.138511
     12          8           0        3.291767   -2.104071    0.059583
     13          8           0       -1.977416    0.760890   -0.022568
     14          1           0       -2.284256    1.631358   -0.330433
     15          8           0       -0.410509    2.948232   -0.012759
     16          1           0        0.208985    3.705698   -0.010640
     17          8           0        2.259297    2.787610   -0.001403
     18          1           0        3.224869    2.676089    0.051310
     19         24           0       -3.382138   -0.824912    0.032881
 ---------------------------------------------------------------------
 Rotational constants (GHZ):           0.7059698           0.4428851           0.2722636
 Leave Link  202 at Sat May 27 00:52:59 2023, MaxMem=  2684354560 cpu:               0.1 elap:               0.0
 (Enter /home/xut/apps/g16/l301.exe)
 Basis read from rwf:  (5D, 7F)
 Pseudo-potential data read from rwf file.
 There are   342 symmetry adapted cartesian basis functions of A   symmetry.
 There are   328 symmetry adapted basis functions of A   symmetry.
   328 basis functions,   538 primitive gaussians,   342 cartesian basis functions
    51 alpha electrons       48 beta electrons
       nuclear repulsion energy       841.4096021324 Hartrees.
 IExCor= 4336 DFT=T Ex+Corr=M062X ExCW=0 ScaHFX=  0.540000
 ScaDFX=  1.000000  1.000000  1.000000  1.000000 ScalE2=  1.000000  1.000000
 IRadAn=      5 IRanWt=     -1 IRanGd=            0 ICorTp=0 IEmpDi=  4
 NAtoms=   19 NActive=   19 NUniq=   19 SFac= 1.00D+00 NAtFMM=   60 NAOKFM=F Big=F
 Integral buffers will be    131072 words long.
 Raffenetti 2 integral format.
 Two-electron integral symmetry is turned on.
 No density basis found on file   724.
 ------------------------------------------------------------------------------
 Polarizable Continuum Model (PCM)
 =================================
 Model                : PCM.
 Atomic radii         : SMD-Coulomb.
 Polarization charges : Total charges.
 Charge compensation  : None.
 Solution method      : On-the-fly selection.
 Cavity type          : VdW (van der Waals Surface) (Alpha=1.000).
 Cavity algorithm     : GePol (No added spheres)
                        Default sphere list used, NSphG=   19.
                        Lebedev-Laikov grids with approx.  5.0 points / Ang**2.
                        Smoothing algorithm: York/Karplus (Gamma=1.0000).
                        Polarization charges: spherical gaussians, with
                                              point-specific exponents (IZeta= 3).
                        Self-potential: point-specific (ISelfS= 7).
                        Self-field    : sphere-specific E.n sum rule (ISelfD= 2).
 1st derivatives      : Analytical E(r).r(x)/FMM algorithm (CHGder, D1EAlg=3).
                        Cavity 1st derivative terms included.
 Solvent              : Water, Eps=  78.355300 Eps(inf)=   1.777849
 ------------------------------------------------------------------------------
 Spheres list:
 ISph  on   Nord     Re0    Alpha      Xe            Ye            Ze
    1   C      1    1.8500  1.000      1.618241      1.651912      0.012832
    2   C      2    1.8500  1.000      2.192763      0.382287      0.022488
    3   C      3    1.8500  1.000      1.371437     -0.723578      0.014295
    4   C      4    1.8500  1.000     -0.053108     -0.606016     -0.010982
    5   C      5    1.8500  1.000     -0.631833      0.620768     -0.025036
    6   C      6    1.8500  1.000      0.173792      1.795550      0.000127
    7   H      7    1.2000  1.000      3.270451      0.279272      0.027503
    8   H      8    1.2000  1.000     -0.720228     -1.463239     -0.019927
    9   C      9    1.8500  1.000      2.090160     -2.057622      0.002833
   10   O     10    1.5200  1.000      1.395134     -3.184169     -0.081323
   11   H     11    1.2000  1.000      0.436606     -3.079047     -0.138511
   12   O     12    1.5200  1.000      3.291767     -2.104071      0.059583
   13   O     13    1.5200  1.000     -1.977416      0.760890     -0.022568
   14   H     14    1.2000  1.000     -2.284256      1.631358     -0.330433
   15   O     15    1.5200  1.000     -0.410509      2.948232     -0.012759
   16   H     16    1.2000  1.000      0.208985      3.705698     -0.010640
   17   O     17    1.5200  1.000      2.259297      2.787610     -0.001403
   18   H     18    1.2000  1.000      3.224869      2.676089      0.051310
   19  Cr     19    1.5115  1.000     -3.382138     -0.824912      0.032881
 ------------------------------------------------------------------------------
 GePol: Number of generator spheres                  =      19
 GePol: Total number of spheres                      =      19
 GePol: Number of exposed spheres                    =      19 (100.00%)
 GePol: Number of points                             =    1463
 GePol: Average weight of points                     =       0.13
 GePol: Minimum weight of points                     =   0.98D-10
 GePol: Maximum weight of points                     =    0.21991
 GePol: Number of points with low weight             =      74
 GePol: Fraction of low-weight points (<1% of avg)   =       5.06%
 GePol: Cavity surface area                          =    187.971 Ang**2
 GePol: Cavity volume                                =    155.178 Ang**3
 ------------------------------------------------------------------------------
 Atomic radii for non-electrostatic terms: SMD-CDS.
 ------------------------------------------------------------------------------
 PCM non-electrostatic energy =         0.0108573965 Hartrees.
 Nuclear repulsion after PCM non-electrostatic terms =      841.4204595290 Hartrees.
 Leave Link  301 at Sat May 27 00:52:59 2023, MaxMem=  2684354560 cpu:               0.6 elap:               0.1
 (Enter /home/xut/apps/g16/l302.exe)
 NPDir=0 NMtPBC=     1 NCelOv=     1 NCel=       1 NClECP=     1 NCelD=      1
         NCelK=      1 NCelE2=     1 NClLst=     1 CellRange=     0.0.
 One-electron integrals computed using PRISM.
 One-electron integral symmetry used in STVInt
   1 Symmetry operations used in ECPInt.
 ECPInt:  NShTT=    6105 NPrTT=   23469 LenC2=    5814 LenP2D=   15874.
 LDataN:  DoStor=T MaxTD1= 4 Len=   56
 NBasis=   328 RedAO= T EigKep=  1.16D-06  NBF=   328
 NBsUse=   327 1.00D-06 EigRej=  6.90D-07 NBFU=   327
 Precomputing XC quadrature grid using
 IXCGrd= 4 IRadAn=           5 IRanWt=          -1 IRanGd=           0 AccXCQ= 0.00D+00.
 Generated NRdTot=       0 NPtTot=           0 NUsed=           0 NTot=          32
 NSgBfM=   342   342   342   342   342 MxSgAt=    19 MxSgA2=    19.
 Leave Link  302 at Sat May 27 00:52:59 2023, MaxMem=  2684354560 cpu:               2.3 elap:               0.2
 (Enter /home/xut/apps/g16/l303.exe)
 DipDrv:  MaxL=1.
 Leave Link  303 at Sat May 27 00:52:59 2023, MaxMem=  2684354560 cpu:               0.3 elap:               0.0
 (Enter /home/xut/apps/g16/l401.exe)
 Initial guess from the checkpoint file:  "149-91-7-meta13-Cr.chk"
 B after Tr=    -0.000000   -0.000000   -0.000000
         Rot=    0.999996   -0.000141   -0.000109    0.002797 Ang=  -0.32 deg.
 Guess basis will be translated and rotated to current coordinates.
 JPrj=2 DoOrth=T DoCkMO=T.
 Initial guess <Sx>= 0.0000 <Sy>= 0.0000 <Sz>= 1.5000 <S**2>= 4.7665 S= 1.7398
 Generating alternative initial guess.
 ExpMin= 1.90D-02 ExpMax= 8.59D+03 ExpMxC= 1.30D+03 IAcc=3 IRadAn=         5 AccDes= 0.00D+00
 Harris functional with IExCor= 1009 and IRadAn=       5 diagonalized for initial guess.
 HarFok:  IExCor= 1009 AccDes= 0.00D+00 IRadAn=         5 IDoV= 1 UseB2=F ITyADJ=14
 ICtDFT=  3500011 ScaDFX=  1.000000  1.000000  1.000000  1.000000
 FoFCou: FMM=F IPFlag=           0 FMFlag=      100000 FMFlg1=           0
         NFxFlg=           0 DoJE=T BraDBF=F KetDBF=T FulRan=T
         wScrn=  0.000000 ICntrl=       500 IOpCl=  0 I1Cent=   200000004 NGrid=           0
         NMat0=    1 NMatS0=      1 NMatT0=    0 NMatD0=    1 NMtDS0=    0 NMtDT0=    0
 Petite list used in FoFCou.
 Harris En= -732.135226430997    
 Leave Link  401 at Sat May 27 00:53:00 2023, MaxMem=  2684354560 cpu:              10.9 elap:               1.1
 (Enter /home/xut/apps/g16/l502.exe)
 Integral symmetry usage will be decided dynamically.
 UHF open shell SCF:
 Using DIIS extrapolation, IDIIS=  1040.
 NGot=  2684354560 LenX=  2684113999 LenY=  2683996594
 Requested convergence on RMS density matrix=1.00D-06 within 128 cycles.
 Requested convergence on MAX density matrix=1.00D-04.
 Requested convergence on             energy=1.00D-04.
 No special actions if energy rises.
 Fock matrices will be formed incrementally for  20 cycles.

 Cycle   1  Pass 1  IDiag  1:
 FoFJK:  IHMeth= 1 ICntrl=       0 DoSepK=F KAlg= 0 I1Cent=           0 FoldK=F
 IRaf= 910000000 NMat=       1 IRICut=       1 DoRegI=T DoRafI=F ISym2E= 0 IDoP0=0 IntGTp=1.
 FoFCou: FMM=F IPFlag=           0 FMFlag=      100000 FMFlg1=           0
         NFxFlg=           0 DoJE=F BraDBF=F KetDBF=F FulRan=T
         wScrn=  0.000000 ICntrl=         0 IOpCl=  1 I1Cent=           0 NGrid=           0
         NMat0=    1 NMatS0=      1 NMatT0=    0 NMatD0=    1 NMtDS0=    0 NMtDT0=    0
 Symmetry not used in FoFCou.
 Inv3:  Mode=1 IEnd=     6421107.
 Iteration    1 A*A^-1 deviation from unit magnitude is 3.22D-15 for    197.
 Iteration    1 A*A^-1 deviation from orthogonality  is 1.55D-15 for   1391    778.
 Iteration    1 A^-1*A deviation from unit magnitude is 3.22D-15 for    197.
 Iteration    1 A^-1*A deviation from orthogonality  is 2.04D-15 for    555    428.
 E= -732.283429642135    
 DIIS: error= 5.47D-03 at cycle   1 NSaved=   1.
 NSaved= 1 IEnMin= 1 EnMin= -732.283429642135     IErMin= 1 ErrMin= 5.47D-03
 ErrMax= 5.47D-03  0.00D+00 EMaxC= 1.00D-01 BMatC= 4.93D-02 BMatP= 4.93D-02
 IDIUse=3 WtCom= 9.45D-01 WtEn= 5.47D-02
 Coeff-Com:  0.100D+01
 Coeff-En:   0.100D+01
 Coeff:      0.100D+01
 Gap=     0.463 Goal=   None    Shift=    0.000
 Gap=     0.463 Goal=   None    Shift=    0.000
 GapD=    0.463 DampG=2.000 DampE=1.000 DampFc=2.0000 IDamp=-1.
 RMSDP=1.34D-02 MaxDP=1.99D+00              OVMax= 2.93D-02

 Cycle   2  Pass 1  IDiag  1:
 RMSU=  1.25D-02    CP:  1.05D+00
 E= -732.299605040491     Delta-E=       -0.016175398356 Rises=F Damp=F
 DIIS: error= 1.00D-03 at cycle   2 NSaved=   2.
 NSaved= 2 IEnMin= 2 EnMin= -732.299605040491     IErMin= 2 ErrMin= 1.00D-03
 ErrMax= 1.00D-03  0.00D+00 EMaxC= 1.00D-01 BMatC= 1.39D-03 BMatP= 4.93D-02
 IDIUse=3 WtCom= 9.90D-01 WtEn= 1.00D-02
 Coeff-Com: -0.102D+00 0.110D+01
 Coeff-En:   0.000D+00 0.100D+01
 Coeff:     -0.101D+00 0.110D+01
 Gap=     0.156 Goal=   None    Shift=    0.000
 Gap=     0.275 Goal=   None    Shift=    0.000
 RMSDP=1.54D-03 MaxDP=1.95D-01 DE=-1.62D-02 OVMax= 1.01D-02

 Cycle   3  Pass 1  IDiag  1:
 RMSU=  1.22D-03    CP:  1.06D+00  1.04D+00
 E= -732.300201647766     Delta-E=       -0.000596607275 Rises=F Damp=F
 DIIS: error= 4.15D-04 at cycle   3 NSaved=   3.
 NSaved= 3 IEnMin= 3 EnMin= -732.300201647766     IErMin= 3 ErrMin= 4.15D-04
 ErrMax= 4.15D-04  0.00D+00 EMaxC= 1.00D-01 BMatC= 5.30D-04 BMatP= 1.39D-03
 IDIUse=3 WtCom= 9.96D-01 WtEn= 4.15D-03
 Coeff-Com: -0.594D-01 0.449D+00 0.610D+00
 Coeff-En:   0.000D+00 0.000D+00 0.100D+01
 Coeff:     -0.592D-01 0.447D+00 0.612D+00
 Gap=     0.158 Goal=   None    Shift=    0.000
 Gap=     0.274 Goal=   None    Shift=    0.000
 RMSDP=4.22D-04 MaxDP=7.59D-02 DE=-5.97D-04 OVMax= 4.82D-03

 Cycle   4  Pass 1  IDiag  1:
 RMSU=  2.69D-04    CP:  1.06D+00  1.03D+00  9.33D-01
 E= -732.300322448018     Delta-E=       -0.000120800252 Rises=F Damp=F
 DIIS: error= 1.39D-04 at cycle   4 NSaved=   4.
 NSaved= 4 IEnMin= 4 EnMin= -732.300322448018     IErMin= 4 ErrMin= 1.39D-04
 ErrMax= 1.39D-04  0.00D+00 EMaxC= 1.00D-01 BMatC= 5.20D-05 BMatP= 5.30D-04
 IDIUse=3 WtCom= 9.99D-01 WtEn= 1.39D-03
 Coeff-Com:  0.419D-03-0.618D-01 0.177D+00 0.884D+00
 Coeff-En:   0.000D+00 0.000D+00 0.000D+00 0.100D+01
 Coeff:      0.419D-03-0.617D-01 0.177D+00 0.884D+00
 Gap=     0.158 Goal=   None    Shift=    0.000
 Gap=     0.274 Goal=   None    Shift=    0.000
 RMSDP=1.18D-04 MaxDP=1.11D-02 DE=-1.21D-04 OVMax= 2.55D-03

 Cycle   5  Pass 1  IDiag  1:
 RMSU=  9.37D-05    CP:  1.06D+00  1.03D+00  9.62D-01  8.54D-01
 E= -732.300346322101     Delta-E=       -0.000023874083 Rises=F Damp=F
 DIIS: error= 1.25D-04 at cycle   5 NSaved=   5.
 NSaved= 5 IEnMin= 5 EnMin= -732.300346322101     IErMin= 5 ErrMin= 1.25D-04
 ErrMax= 1.25D-04  0.00D+00 EMaxC= 1.00D-01 BMatC= 7.22D-06 BMatP= 5.20D-05
 IDIUse=3 WtCom= 9.99D-01 WtEn= 1.25D-03
 Coeff-Com:  0.528D-02-0.601D-01 0.898D-02 0.284D+00 0.762D+00
 Coeff-En:   0.000D+00 0.000D+00 0.000D+00 0.000D+00 0.100D+01
 Coeff:      0.527D-02-0.600D-01 0.897D-02 0.284D+00 0.762D+00
 Gap=     0.157 Goal=   None    Shift=    0.000
 Gap=     0.274 Goal=   None    Shift=    0.000
 RMSDP=8.55D-05 MaxDP=1.44D-02 DE=-2.39D-05 OVMax= 2.41D-03

 Cycle   6  Pass 1  IDiag  1:
 RMSU=  4.64D-05    CP:  1.06D+00  1.03D+00  9.36D-01  9.77D-01  1.32D+00
 E= -732.300353918039     Delta-E=       -0.000007595938 Rises=F Damp=F
 DIIS: error= 8.01D-05 at cycle   6 NSaved=   6.
 NSaved= 6 IEnMin= 6 EnMin= -732.300353918039     IErMin= 6 ErrMin= 8.01D-05
 ErrMax= 8.01D-05  0.00D+00 EMaxC= 1.00D-01 BMatC= 3.45D-06 BMatP= 7.22D-06
 IDIUse=1 WtCom= 1.00D+00 WtEn= 0.00D+00
 Coeff-Com:  0.141D-02-0.734D-02-0.238D-01-0.807D-01 0.292D+00 0.819D+00
 Coeff:      0.141D-02-0.734D-02-0.238D-01-0.807D-01 0.292D+00 0.819D+00
 Gap=     0.157 Goal=   None    Shift=    0.000
 Gap=     0.274 Goal=   None    Shift=    0.000
 RMSDP=6.68D-05 MaxDP=9.79D-03 DE=-7.60D-06 OVMax= 2.21D-03

 Cycle   7  Pass 1  IDiag  1:
 RMSU=  1.99D-05    CP:  1.06D+00  1.03D+00  9.17D-01  1.03D+00  1.69D+00
                    CP:  1.79D+00
 E= -732.300359994504     Delta-E=       -0.000006076466 Rises=F Damp=F
 DIIS: error= 7.32D-05 at cycle   7 NSaved=   7.
 NSaved= 7 IEnMin= 7 EnMin= -732.300359994504     IErMin= 7 ErrMin= 7.32D-05
 ErrMax= 7.32D-05  0.00D+00 EMaxC= 1.00D-01 BMatC= 1.96D-06 BMatP= 3.45D-06
 IDIUse=1 WtCom= 1.00D+00 WtEn= 0.00D+00
 Coeff-Com: -0.149D-02 0.191D-01-0.424D-02-0.134D+00-0.129D+00 0.660D-01
 Coeff-Com:  0.118D+01
 Coeff:     -0.149D-02 0.191D-01-0.424D-02-0.134D+00-0.129D+00 0.660D-01
 Coeff:      0.118D+01
 Gap=     0.157 Goal=   None    Shift=    0.000
 Gap=     0.274 Goal=   None    Shift=    0.000
 RMSDP=8.53D-05 MaxDP=1.03D-02 DE=-6.08D-06 OVMax= 2.95D-03

 Cycle   8  Pass 1  IDiag  1:
 RMSU=  1.34D-05    CP:  1.06D+00  1.03D+00  8.93D-01  1.08D+00  2.20D+00
                    CP:  2.89D+00  2.39D+00
 E= -732.300367221055     Delta-E=       -0.000007226551 Rises=F Damp=F
 DIIS: error= 6.95D-05 at cycle   8 NSaved=   8.
 NSaved= 8 IEnMin= 8 EnMin= -732.300367221055     IErMin= 8 ErrMin= 6.95D-05
 ErrMax= 6.95D-05  0.00D+00 EMaxC= 1.00D-01 BMatC= 1.59D-06 BMatP= 1.96D-06
 IDIUse=1 WtCom= 1.00D+00 WtEn= 0.00D+00
 Coeff-Com: -0.965D-03 0.626D-02 0.192D-01 0.193D-01-0.151D+00-0.606D+00
 Coeff-Com:  0.299D+00 0.142D+01
 Coeff:     -0.965D-03 0.626D-02 0.192D-01 0.193D-01-0.151D+00-0.606D+00
 Coeff:      0.299D+00 0.142D+01
 Gap=     0.157 Goal=   None    Shift=    0.000
 Gap=     0.274 Goal=   None    Shift=    0.000
 RMSDP=1.30D-04 MaxDP=1.86D-02 DE=-7.23D-06 OVMax= 3.96D-03

 Cycle   9  Pass 1  IDiag  1:
 RMSU=  7.86D-05    CP:  1.06D+00  1.02D+00  8.58D-01  1.16D+00  2.90D+00
                    CP:  3.00D+00  3.00D+00  2.19D+00
 E= -732.300376194339     Delta-E=       -0.000008973284 Rises=F Damp=F
 DIIS: error= 6.43D-05 at cycle   9 NSaved=   9.
 NSaved= 9 IEnMin= 9 EnMin= -732.300376194339     IErMin= 9 ErrMin= 6.43D-05
 ErrMax= 6.43D-05  0.00D+00 EMaxC= 1.00D-01 BMatC= 1.18D-06 BMatP= 1.59D-06
 IDIUse=1 WtCom= 1.00D+00 WtEn= 0.00D+00
 Coeff-Com:  0.101D-02-0.157D-01 0.154D-01 0.132D+00 0.828D-01-0.397D+00
 Coeff-Com: -0.956D+00 0.667D+00 0.147D+01
 Coeff:      0.101D-02-0.157D-01 0.154D-01 0.132D+00 0.828D-01-0.397D+00
 Coeff:     -0.956D+00 0.667D+00 0.147D+01
 Gap=     0.157 Goal=   None    Shift=    0.000
 Gap=     0.274 Goal=   None    Shift=    0.000
 RMSDP=1.85D-04 MaxDP=2.54D-02 DE=-8.97D-06 OVMax= 5.93D-03

 Cycle  10  Pass 1  IDiag  1:
 RMSU=  8.55D-05    CP:  1.06D+00  1.02D+00  8.08D-01  1.28D+00  3.00D+00
                    CP:  3.00D+00  3.00D+00  3.00D+00  2.62D+00
 E= -732.300386581722     Delta-E=       -0.000010387383 Rises=F Damp=F
 DIIS: error= 5.59D-05 at cycle  10 NSaved=  10.
 NSaved=10 IEnMin=10 EnMin= -732.300386581722     IErMin=10 ErrMin= 5.59D-05
 ErrMax= 5.59D-05  0.00D+00 EMaxC= 1.00D-01 BMatC= 8.15D-07 BMatP= 1.18D-06
 IDIUse=1 WtCom= 1.00D+00 WtEn= 0.00D+00
 Coeff-Com:  0.109D-02-0.113D-01-0.596D-02 0.467D-01 0.131D+00 0.223D+00
 Coeff-Com: -0.619D+00-0.629D+00 0.660D+00 0.120D+01
 Coeff:      0.109D-02-0.113D-01-0.596D-02 0.467D-01 0.131D+00 0.223D+00
 Coeff:     -0.619D+00-0.629D+00 0.660D+00 0.120D+01
 Gap=     0.157 Goal=   None    Shift=    0.000
 Gap=     0.274 Goal=   None    Shift=    0.000
 RMSDP=1.67D-04 MaxDP=2.40D-02 DE=-1.04D-05 OVMax= 5.43D-03

 Cycle  11  Pass 1  IDiag  1:
 RMSU=  8.44D-05    CP:  1.06D+00  1.02D+00  7.62D-01  1.38D+00  3.00D+00
                    CP:  3.00D+00  3.00D+00  3.00D+00  3.00D+00  1.99D+00
 E= -732.300393802762     Delta-E=       -0.000007221040 Rises=F Damp=F
 DIIS: error= 4.87D-05 at cycle  11 NSaved=  11.
 NSaved=11 IEnMin=11 EnMin= -732.300393802762     IErMin=11 ErrMin= 4.87D-05
 ErrMax= 4.87D-05  0.00D+00 EMaxC= 1.00D-01 BMatC= 6.10D-07 BMatP= 8.15D-07
 IDIUse=1 WtCom= 1.00D+00 WtEn= 0.00D+00
 Coeff-Com: -0.291D-03 0.590D-02-0.116D-01-0.566D-01-0.329D-01 0.314D+00
 Coeff-Com:  0.304D+00-0.485D+00-0.633D+00 0.257D+00 0.134D+01
 Coeff:     -0.291D-03 0.590D-02-0.116D-01-0.566D-01-0.329D-01 0.314D+00
 Coeff:      0.304D+00-0.485D+00-0.633D+00 0.257D+00 0.134D+01
 Gap=     0.157 Goal=   None    Shift=    0.000
 Gap=     0.274 Goal=   None    Shift=    0.000
 RMSDP=1.46D-04 MaxDP=2.19D-02 DE=-7.22D-06 OVMax= 4.77D-03

 Cycle  12  Pass 1  IDiag  1:
 RMSU=  6.99D-06    CP:  1.06D+00  1.02D+00  7.19D-01  1.48D+00  3.00D+00
                    CP:  3.00D+00  3.00D+00  3.00D+00  3.00D+00  2.77D+00
                    CP:  2.19D+00
 E= -732.300399055674     Delta-E=       -0.000005252912 Rises=F Damp=F
 DIIS: error= 4.22D-05 at cycle  12 NSaved=  12.
 NSaved=12 IEnMin=12 EnMin= -732.300399055674     IErMin=12 ErrMin= 4.22D-05
 ErrMax= 4.22D-05  0.00D+00 EMaxC= 1.00D-01 BMatC= 5.13D-07 BMatP= 6.10D-07
 IDIUse=1 WtCom= 1.00D+00 WtEn= 0.00D+00
 Coeff-Com: -0.129D-02 0.152D-01-0.217D-02-0.751D-01-0.183D+00 0.308D-02
 Coeff-Com:  0.755D+00 0.435D+00-0.103D+01-0.115D+01 0.825D+00 0.140D+01
 Coeff:     -0.129D-02 0.152D-01-0.217D-02-0.751D-01-0.183D+00 0.308D-02
 Coeff:      0.755D+00 0.435D+00-0.103D+01-0.115D+01 0.825D+00 0.140D+01
 Gap=     0.157 Goal=   None    Shift=    0.000
 Gap=     0.274 Goal=   None    Shift=    0.000
 RMSDP=1.75D-04 MaxDP=2.69D-02 DE=-5.25D-06 OVMax= 5.76D-03

 Cycle  13  Pass 1  IDiag  1:
 RMSU=  7.70D-05    CP:  1.06D+00  1.01D+00  6.67D-01  1.59D+00  3.00D+00
                    CP:  3.00D+00  3.00D+00  3.00D+00  3.00D+00  3.00D+00
                    CP:  3.00D+00  2.84D+00
 E= -732.300404549098     Delta-E=       -0.000005493424 Rises=F Damp=F
 DIIS: error= 3.44D-05 at cycle  13 NSaved=  13.
 NSaved=13 IEnMin=13 EnMin= -732.300404549098     IErMin=13 ErrMin= 3.44D-05
 ErrMax= 3.44D-05  0.00D+00 EMaxC= 1.00D-01 BMatC= 3.32D-07 BMatP= 5.13D-07
 IDIUse=1 WtCom= 1.00D+00 WtEn= 0.00D+00
 Coeff-Com:  0.417D-03-0.842D-02 0.139D-01 0.909D-01 0.121D-01-0.359D+00
 Coeff-Com: -0.573D+00 0.675D+00 0.100D+01-0.355D+00-0.180D+01-0.319D+00
 Coeff-Com:  0.261D+01
 Coeff:      0.417D-03-0.842D-02 0.139D-01 0.909D-01 0.121D-01-0.359D+00
 Coeff:     -0.573D+00 0.675D+00 0.100D+01-0.355D+00-0.180D+01-0.319D+00
 Coeff:      0.261D+01
 Gap=     0.157 Goal=   None    Shift=    0.000
 Gap=     0.274 Goal=   None    Shift=    0.000
 RMSDP=3.29D-04 MaxDP=5.06D-02 DE=-5.49D-06 OVMax= 1.09D-02

 Cycle  14  Pass 1  IDiag  1:
 RMSU=  1.29D-04    CP:  1.05D+00  1.01D+00  5.67D-01  1.83D+00  3.00D+00
                    CP:  3.00D+00  3.00D+00  3.00D+00  3.00D+00  3.00D+00
                    CP:  3.00D+00  3.00D+00  3.00D+00
 E= -732.300411931971     Delta-E=       -0.000007382873 Rises=F Damp=F
 DIIS: error= 1.95D-05 at cycle  14 NSaved=  14.
 NSaved=14 IEnMin=14 EnMin= -732.300411931971     IErMin=14 ErrMin= 1.95D-05
 ErrMax= 1.95D-05  0.00D+00 EMaxC= 1.00D-01 BMatC= 1.45D-07 BMatP= 3.32D-07
 IDIUse=1 WtCom= 1.00D+00 WtEn= 0.00D+00
 Coeff-Com:  0.868D-03-0.116D-01 0.574D-02 0.801D-01 0.107D+00-0.138D+00
 Coeff-Com: -0.646D+00 0.753D-01 0.960D+00 0.404D+00-0.113D+01-0.988D+00
 Coeff-Com:  0.109D+01 0.119D+01
 Coeff:      0.868D-03-0.116D-01 0.574D-02 0.801D-01 0.107D+00-0.138D+00
 Coeff:     -0.646D+00 0.753D-01 0.960D+00 0.404D+00-0.113D+01-0.988D+00
 Coeff:      0.109D+01 0.119D+01
 Gap=     0.157 Goal=   None    Shift=    0.000
 Gap=     0.274 Goal=   None    Shift=    0.000
 RMSDP=2.03D-04 MaxDP=3.10D-02 DE=-7.38D-06 OVMax= 6.96D-03

 Cycle  15  Pass 1  IDiag  1:
 RMSU=  5.71D-05    CP:  1.05D+00  1.00D+00  5.07D-01  1.97D+00  3.00D+00
                    CP:  3.00D+00  3.00D+00  3.00D+00  3.00D+00  3.00D+00
                    CP:  3.00D+00  3.00D+00  3.00D+00  2.20D+00
 E= -732.300414430392     Delta-E=       -0.000002498422 Rises=F Damp=F
 DIIS: error= 9.93D-06 at cycle  15 NSaved=  15.
 NSaved=15 IEnMin=15 EnMin= -732.300414430392     IErMin=15 ErrMin= 9.93D-06
 ErrMax= 9.93D-06  0.00D+00 EMaxC= 1.00D-01 BMatC= 5.61D-08 BMatP= 1.45D-07
 IDIUse=1 WtCom= 1.00D+00 WtEn= 0.00D+00
 Coeff-Com:  0.140D-03-0.519D-03-0.530D-02-0.118D-01 0.361D-01 0.107D+00
 Coeff-Com:  0.147D-01-0.287D+00-0.931D-01 0.323D+00 0.476D+00-0.274D+00
 Coeff-Com: -0.833D+00 0.471D+00 0.108D+01
 Coeff:      0.140D-03-0.519D-03-0.530D-02-0.118D-01 0.361D-01 0.107D+00
 Coeff:      0.147D-01-0.287D+00-0.931D-01 0.323D+00 0.476D+00-0.274D+00
 Coeff:     -0.833D+00 0.471D+00 0.108D+01
 Gap=     0.157 Goal=   None    Shift=    0.000
 Gap=     0.274 Goal=   None    Shift=    0.000
 RMSDP=9.34D-05 MaxDP=1.48D-02 DE=-2.50D-06 OVMax= 3.32D-03

 Cycle  16  Pass 1  IDiag  1:
 RMSU=  3.57D-06    CP:  1.05D+00  1.00D+00  4.79D-01  2.04D+00  3.00D+00
                    CP:  3.00D+00  3.00D+00  3.00D+00  3.00D+00  3.00D+00
                    CP:  3.00D+00  3.00D+00  3.00D+00  2.75D+00  1.43D+00
 E= -732.300414985378     Delta-E=       -0.000000554986 Rises=F Damp=F
 DIIS: error= 5.32D-06 at cycle  16 NSaved=  16.
 NSaved=16 IEnMin=16 EnMin= -732.300414985378     IErMin=16 ErrMin= 5.32D-06
 ErrMax= 5.32D-06  0.00D+00 EMaxC= 1.00D-01 BMatC= 1.57D-08 BMatP= 5.61D-08
 IDIUse=1 WtCom= 1.00D+00 WtEn= 0.00D+00
 Coeff-Com: -0.196D-03 0.304D-02-0.325D-02-0.251D-01-0.178D-01 0.679D-01
 Coeff-Com:  0.184D+00-0.102D+00-0.286D+00-0.314D-01 0.445D+00 0.177D+00
 Coeff-Com: -0.525D+00-0.175D+00 0.222D+00 0.107D+01
 Coeff:     -0.196D-03 0.304D-02-0.325D-02-0.251D-01-0.178D-01 0.679D-01
 Coeff:      0.184D+00-0.102D+00-0.286D+00-0.314D-01 0.445D+00 0.177D+00
 Coeff:     -0.525D+00-0.175D+00 0.222D+00 0.107D+01
 Gap=     0.157 Goal=   None    Shift=    0.000
 Gap=     0.274 Goal=   None    Shift=    0.000
 RMSDP=3.39D-05 MaxDP=5.24D-03 DE=-5.55D-07 OVMax= 1.38D-03

 Cycle  17  Pass 1  IDiag  1:
 RMSU=  2.02D-06    CP:  1.05D+00  1.00D+00  4.70D-01  2.07D+00  3.00D+00
                    CP:  3.00D+00  3.00D+00  3.00D+00  3.00D+00  3.00D+00
                    CP:  3.00D+00  3.00D+00  3.00D+00  2.95D+00  1.59D+00
                    CP:  1.87D+00
 E= -732.300415099697     Delta-E=       -0.000000114320 Rises=F Damp=F
 DIIS: error= 3.43D-06 at cycle  17 NSaved=  17.
 NSaved=17 IEnMin=17 EnMin= -732.300415099697     IErMin=17 ErrMin= 3.43D-06
 ErrMax= 3.43D-06  0.00D+00 EMaxC= 1.00D-01 BMatC= 9.27D-09 BMatP= 1.57D-08
 IDIUse=1 WtCom= 1.00D+00 WtEn= 0.00D+00
 Coeff-Com: -0.749D-04 0.846D-03 0.400D-03-0.357D-02-0.127D-01-0.741D-02
 Coeff-Com:  0.459D-01 0.363D-01-0.463D-01-0.844D-01 0.660D-02 0.103D+00
 Coeff-Com:  0.639D-01-0.154D+00-0.251D+00 0.374D+00 0.929D+00
 Coeff:     -0.749D-04 0.846D-03 0.400D-03-0.357D-02-0.127D-01-0.741D-02
 Coeff:      0.459D-01 0.363D-01-0.463D-01-0.844D-01 0.660D-02 0.103D+00
 Coeff:      0.639D-01-0.154D+00-0.251D+00 0.374D+00 0.929D+00
 Gap=     0.157 Goal=   None    Shift=    0.000
 Gap=     0.274 Goal=   None    Shift=    0.000
 RMSDP=7.31D-06 MaxDP=1.22D-03 DE=-1.14D-07 OVMax= 4.03D-04

 Cycle  18  Pass 1  IDiag  1:
 RMSU=  9.51D-07    CP:  1.05D+00  1.00D+00  4.68D-01  2.07D+00  3.00D+00
                    CP:  3.00D+00  3.00D+00  3.00D+00  3.00D+00  3.00D+00
                    CP:  3.00D+00  3.00D+00  3.00D+00  2.99D+00  1.61D+00
                    CP:  2.58D+00  1.88D+00
 E= -732.300415131756     Delta-E=       -0.000000032059 Rises=F Damp=F
 DIIS: error= 3.29D-06 at cycle  18 NSaved=  18.
 NSaved=18 IEnMin=18 EnMin= -732.300415131756     IErMin=18 ErrMin= 3.29D-06
 ErrMax= 3.29D-06  0.00D+00 EMaxC= 1.00D-01 BMatC= 5.97D-09 BMatP= 9.27D-09
 IDIUse=1 WtCom= 1.00D+00 WtEn= 0.00D+00
 Coeff-Com:  0.445D-04-0.705D-03 0.786D-03 0.581D-02 0.496D-02-0.167D-01
 Coeff-Com: -0.474D-01 0.251D-01 0.722D-01 0.609D-02-0.109D+00-0.492D-01
 Coeff-Com:  0.134D+00 0.617D-01-0.686D-01-0.297D+00-0.233D-01 0.130D+01
 Coeff:      0.445D-04-0.705D-03 0.786D-03 0.581D-02 0.496D-02-0.167D-01
 Coeff:     -0.474D-01 0.251D-01 0.722D-01 0.609D-02-0.109D+00-0.492D-01
 Coeff:      0.134D+00 0.617D-01-0.686D-01-0.297D+00-0.233D-01 0.130D+01
 Gap=     0.157 Goal=   None    Shift=    0.000
 Gap=     0.274 Goal=   None    Shift=    0.000
 RMSDP=4.05D-06 MaxDP=4.85D-04 DE=-3.21D-08 OVMax= 2.34D-04

 Cycle  19  Pass 1  IDiag  1:
 RMSU=  1.44D-06    CP:  1.05D+00  1.00D+00  4.70D-01  2.07D+00  3.00D+00
                    CP:  3.00D+00  3.00D+00  3.00D+00  3.00D+00  3.00D+00
                    CP:  3.00D+00  3.00D+00  3.00D+00  2.99D+00  1.60D+00
                    CP:  3.00D+00  2.96D+00  2.20D+00
 E= -732.300415157876     Delta-E=       -0.000000026120 Rises=F Damp=F
 DIIS: error= 3.15D-06 at cycle  19 NSaved=  19.
 NSaved=19 IEnMin=19 EnMin= -732.300415157876     IErMin=19 ErrMin= 3.15D-06
 ErrMax= 3.15D-06  0.00D+00 EMaxC= 1.00D-01 BMatC= 5.07D-09 BMatP= 5.97D-09
 IDIUse=1 WtCom= 1.00D+00 WtEn= 0.00D+00
 Coeff-Com:  0.453D-04-0.533D-03-0.263D-05 0.267D-02 0.689D-02-0.186D-04
 Coeff-Com: -0.271D-01-0.990D-02 0.293D-01 0.402D-01-0.191D-01-0.539D-01
 Coeff-Com: -0.976D-02 0.747D-01 0.106D+00-0.240D+00-0.452D+00 0.186D+00
 Coeff-Com:  0.137D+01
 Coeff:      0.453D-04-0.533D-03-0.263D-05 0.267D-02 0.689D-02-0.186D-04
 Coeff:     -0.271D-01-0.990D-02 0.293D-01 0.402D-01-0.191D-01-0.539D-01
 Coeff:     -0.976D-02 0.747D-01 0.106D+00-0.240D+00-0.452D+00 0.186D+00
 Coeff:      0.137D+01
 Gap=     0.157 Goal=   None    Shift=    0.000
 Gap=     0.274 Goal=   None    Shift=    0.000
 RMSDP=6.02D-06 MaxDP=6.20D-04 DE=-2.61D-08 OVMax= 2.28D-04

 Cycle  20  Pass 1  IDiag  1:
 RMSU=  3.26D-06    CP:  1.05D+00  1.00D+00  4.72D-01  2.07D+00  3.00D+00
                    CP:  3.00D+00  3.00D+00  3.00D+00  3.00D+00  3.00D+00
                    CP:  3.00D+00  3.00D+00  3.00D+00  2.98D+00  1.58D+00
                    CP:  3.00D+00  3.00D+00  3.00D+00  3.00D+00
 E= -732.300415187569     Delta-E=       -0.000000029693 Rises=F Damp=F
 DIIS: error= 2.87D-06 at cycle  20 NSaved=  20.
 NSaved=20 IEnMin=20 EnMin= -732.300415187569     IErMin=20 ErrMin= 2.87D-06
 ErrMax= 2.87D-06  0.00D+00 EMaxC= 1.00D-01 BMatC= 4.39D-09 BMatP= 5.07D-09
 IDIUse=1 WtCom= 1.00D+00 WtEn= 0.00D+00
 Coeff-Com: -0.498D-04 0.801D-03-0.107D-02-0.701D-02-0.386D-02 0.229D-01
 Coeff-Com:  0.503D-01-0.365D-01-0.871D-01 0.814D-02 0.137D+00 0.455D-01
 Coeff-Com: -0.182D+00-0.431D-01 0.158D+00 0.237D+00-0.158D+00-0.147D+01
 Coeff-Com:  0.697D+00 0.164D+01
 Coeff:     -0.498D-04 0.801D-03-0.107D-02-0.701D-02-0.386D-02 0.229D-01
 Coeff:      0.503D-01-0.365D-01-0.871D-01 0.814D-02 0.137D+00 0.455D-01
 Coeff:     -0.182D+00-0.431D-01 0.158D+00 0.237D+00-0.158D+00-0.147D+01
 Coeff:      0.697D+00 0.164D+01
 Gap=     0.157 Goal=   None    Shift=    0.000
 Gap=     0.274 Goal=   None    Shift=    0.000
 RMSDP=1.08D-05 MaxDP=1.16D-03 DE=-2.97D-08 OVMax= 3.68D-04

 Cycle  21  Pass 1  IDiag  1:
 Restarting incremental Fock formation.
 E= -732.300415231794     Delta-E=       -0.000000044225 Rises=F Damp=F
 DIIS: error= 2.43D-06 at cycle  21 NSaved=  20.
 NSaved=20 IEnMin=20 EnMin= -732.300415231794     IErMin=20 ErrMin= 2.43D-06
 ErrMax= 2.43D-06  0.00D+00 EMaxC= 1.00D-01 BMatC= 3.11D-09 BMatP= 4.39D-09
 IDIUse=1 WtCom= 1.00D+00 WtEn= 0.00D+00
 Coeff-Com:  0.763D-04 0.130D-03-0.276D-03-0.611D-02-0.508D-03 0.145D-01
 Coeff-Com:  0.193D-02-0.393D-02-0.270D-01-0.119D-01 0.550D-01 0.314D-01
 Coeff-Com: -0.100D+00-0.135D+00 0.341D+00 0.789D+00-0.579D+00-0.243D+01
 Coeff-Com:  0.997D-01 0.296D+01
 Coeff:      0.763D-04 0.130D-03-0.276D-03-0.611D-02-0.508D-03 0.145D-01
 Coeff:      0.193D-02-0.393D-02-0.270D-01-0.119D-01 0.550D-01 0.314D-01
 Coeff:     -0.100D+00-0.135D+00 0.341D+00 0.789D+00-0.579D+00-0.243D+01
 Coeff:      0.997D-01 0.296D+01
 Gap=     0.157 Goal=   None    Shift=    0.000
 Gap=     0.274 Goal=   None    Shift=    0.000
 RMSDP=3.03D-05 MaxDP=3.35D-03 DE=-4.42D-08 OVMax= 1.04D-03

 Cycle  22  Pass 1  IDiag  1:
 RMSU=  2.94D-05    CP:  1.00D+00
 E= -732.300415313374     Delta-E=       -0.000000081580 Rises=F Damp=F
 DIIS: error= 1.15D-06 at cycle  22 NSaved=  20.
 NSaved=20 IEnMin=20 EnMin= -732.300415313374     IErMin=20 ErrMin= 1.15D-06
 ErrMax= 1.15D-06  0.00D+00 EMaxC= 1.00D-01 BMatC= 1.19D-09 BMatP= 3.11D-09
 IDIUse=1 WtCom= 1.00D+00 WtEn= 0.00D+00
 Coeff-Com:  0.347D-03 0.838D-03-0.322D-02-0.654D-02 0.127D-02 0.130D-01
 Coeff-Com:  0.168D-01-0.248D-01-0.430D-01 0.250D-01 0.653D-01-0.397D-01
 Coeff-Com: -0.123D+00 0.666D-01 0.479D+00 0.374D+00-0.144D+01-0.906D+00
 Coeff-Com:  0.149D+01 0.105D+01
 Coeff:      0.347D-03 0.838D-03-0.322D-02-0.654D-02 0.127D-02 0.130D-01
 Coeff:      0.168D-01-0.248D-01-0.430D-01 0.250D-01 0.653D-01-0.397D-01
 Coeff:     -0.123D+00 0.666D-01 0.479D+00 0.374D+00-0.144D+01-0.906D+00
 Coeff:      0.149D+01 0.105D+01
 Gap=     0.157 Goal=   None    Shift=    0.000
 Gap=     0.274 Goal=   None    Shift=    0.000
 RMSDP=1.79D-05 MaxDP=2.01D-03 DE=-8.16D-08 OVMax= 6.17D-04

 Cycle  23  Pass 1  IDiag  1:
 RMSU=  5.06D-07    CP:  1.00D+00  1.59D+00
 E= -732.300415334261     Delta-E=       -0.000000020887 Rises=F Damp=F
 DIIS: error= 6.19D-07 at cycle  23 NSaved=  20.
 NSaved=20 IEnMin=20 EnMin= -732.300415334261     IErMin=20 ErrMin= 6.19D-07
 ErrMax= 6.19D-07  0.00D+00 EMaxC= 1.00D-01 BMatC= 2.49D-10 BMatP= 1.19D-09
 IDIUse=1 WtCom= 1.00D+00 WtEn= 0.00D+00
 Coeff-Com:  0.379D-04 0.134D-02-0.129D-02-0.176D-02-0.125D-02 0.184D-02
 Coeff-Com:  0.436D-02 0.203D-02-0.718D-02-0.998D-02 0.231D-01 0.358D-01
 Coeff-Com: -0.985D-01-0.181D+00 0.178D+00 0.712D+00-0.257D+00-0.748D+00
 Coeff-Com:  0.123D+00 0.123D+01
 Coeff:      0.379D-04 0.134D-02-0.129D-02-0.176D-02-0.125D-02 0.184D-02
 Coeff:      0.436D-02 0.203D-02-0.718D-02-0.998D-02 0.231D-01 0.358D-01
 Coeff:     -0.985D-01-0.181D+00 0.178D+00 0.712D+00-0.257D+00-0.748D+00
 Coeff:      0.123D+00 0.123D+01
 Gap=     0.157 Goal=   None    Shift=    0.000
 Gap=     0.274 Goal=   None    Shift=    0.000
 RMSDP=7.50D-06 MaxDP=8.53D-04 DE=-2.09D-08 OVMax= 2.51D-04

 Cycle  24  Pass 1  IDiag  1:
 RMSU=  3.38D-07    CP:  1.00D+00  1.84D+00  1.34D+00
 E= -732.300415337126     Delta-E=       -0.000000002865 Rises=F Damp=F
 DIIS: error= 3.74D-07 at cycle  24 NSaved=  20.
 NSaved=20 IEnMin=20 EnMin= -732.300415337126     IErMin=20 ErrMin= 3.74D-07
 ErrMax= 3.74D-07  0.00D+00 EMaxC= 1.00D-01 BMatC= 6.63D-11 BMatP= 2.49D-10
 IDIUse=1 WtCom= 1.00D+00 WtEn= 0.00D+00
 Coeff-Com:  0.521D-03-0.235D-03 0.283D-03-0.114D-02-0.968D-03 0.309D-02
 Coeff-Com:  0.554D-02-0.302D-02-0.127D-01 0.796D-02 0.233D-01-0.258D-01
 Coeff-Com: -0.101D+00-0.486D-01 0.344D+00 0.109D+00-0.324D+00-0.183D+00
 Coeff-Com:  0.174D+00 0.103D+01
 Coeff:      0.521D-03-0.235D-03 0.283D-03-0.114D-02-0.968D-03 0.309D-02
 Coeff:      0.554D-02-0.302D-02-0.127D-01 0.796D-02 0.233D-01-0.258D-01
 Coeff:     -0.101D+00-0.486D-01 0.344D+00 0.109D+00-0.324D+00-0.183D+00
 Coeff:      0.174D+00 0.103D+01
 Gap=     0.157 Goal=   None    Shift=    0.000
 Gap=     0.274 Goal=   None    Shift=    0.000
 RMSDP=1.29D-06 MaxDP=1.49D-04 DE=-2.87D-09 OVMax= 3.99D-05

 Cycle  25  Pass 1  IDiag  1:
 RMSU=  1.54D-07    CP:  1.00D+00  1.88D+00  1.47D+00  1.12D+00
 E= -732.300415337335     Delta-E=       -0.000000000208 Rises=F Damp=F
 DIIS: error= 3.45D-07 at cycle  25 NSaved=  20.
 NSaved=20 IEnMin=20 EnMin= -732.300415337335     IErMin=20 ErrMin= 3.45D-07
 ErrMax= 3.45D-07  0.00D+00 EMaxC= 1.00D-01 BMatC= 3.75D-11 BMatP= 6.63D-11
 IDIUse=1 WtCom= 1.00D+00 WtEn= 0.00D+00
 Coeff-Com:  0.624D-03 0.707D-03-0.177D-02-0.917D-03 0.117D-02 0.292D-02
 Coeff-Com:  0.403D-03-0.501D-02-0.249D-02 0.371D-02 0.223D-01 0.250D-02
 Coeff-Com: -0.101D+00-0.445D-01 0.148D+00 0.824D-01-0.144D+00-0.333D+00
 Coeff-Com:  0.500D+00 0.868D+00
 Coeff:      0.624D-03 0.707D-03-0.177D-02-0.917D-03 0.117D-02 0.292D-02
 Coeff:      0.403D-03-0.501D-02-0.249D-02 0.371D-02 0.223D-01 0.250D-02
 Coeff:     -0.101D+00-0.445D-01 0.148D+00 0.824D-01-0.144D+00-0.333D+00
 Coeff:      0.500D+00 0.868D+00
 Gap=     0.157 Goal=   None    Shift=    0.000
 Gap=     0.274 Goal=   None    Shift=    0.000
 RMSDP=5.53D-07 MaxDP=6.29D-05 DE=-2.08D-10 OVMax= 1.42D-05

 Error on total polarization charges =  0.04336
 SCF Done:  E(UM062X) =  -732.300415337     A.U. after   25 cycles
            NFock= 25  Conv=0.55D-06     -V/T= 2.0641
 <Sx>= 0.0000 <Sy>= 0.0000 <Sz>= 1.5000 <S**2>= 4.7660 S= 1.7396
 <L.S>=  0.00000000000    
 KE= 6.882097149154D+02 PE=-3.341974117451D+03 EE= 1.080043527669D+03
 SMD-CDS (non-electrostatic) energy       (kcal/mol) =       6.81
 (included in total energy above)
 Annihilation of the first spin contaminant:
 S**2 before annihilation     4.7660,   after     3.7744
 Leave Link  502 at Sat May 27 00:54:59 2023, MaxMem=  2684354560 cpu:            1179.8 elap:             118.4
 (Enter /home/xut/apps/g16/l701.exe)
 ... and contract with generalized density number  0.
 Compute integral first derivatives.
   1 Symmetry operations used in ECPInt.
 ECPInt:  NShTT=    6105 NPrTT=   23469 LenC2=    5814 LenP2D=   15874.
 LDataN:  DoStor=T MaxTD1= 5 Len=  102
 D1PCM: PCM CHGder 1st derivatives, ID1Alg=3 FixD1E=F DoIter=F DoCFld=F I1PDM=0.
 GePol: Maximum number of non-zero 1st derivatives   =     188
 Leave Link  701 at Sat May 27 00:54:59 2023, MaxMem=  2684354560 cpu:               8.9 elap:               0.9
 (Enter /home/xut/apps/g16/l702.exe)
 L702 exits ... SP integral derivatives will be done elsewhere.
 Leave Link  702 at Sat May 27 00:54:59 2023, MaxMem=  2684354560 cpu:               0.1 elap:               0.0
 (Enter /home/xut/apps/g16/l703.exe)
 Integral derivatives from FoFJK, PRISM(SPDF).
 Compute integral first derivatives, UseDBF=F ICtDFT=           0.
 Calling FoFJK, ICntrl=      2127 FMM=F ISym2X=0 I1Cent= 0 IOpClX= 1 NMat=1 NMatS=1 NMatT=0.
 FoFJK:  IHMeth= 1 ICntrl=    2127 DoSepK=F KAlg= 0 I1Cent=           0 FoldK=F
 IRaf=         0 NMat=       1 IRICut=       1 DoRegI=T DoRafI=F ISym2E= 0 IDoP0=0 IntGTp=1.
 FoFCou: FMM=F IPFlag=           0 FMFlag=      100000 FMFlg1=         800
         NFxFlg=           0 DoJE=F BraDBF=F KetDBF=F FulRan=T
         wScrn=  0.000000 ICntrl=      2127 IOpCl=  1 I1Cent=           0 NGrid=           0
         NMat0=    1 NMatS0=      1 NMatT0=    0 NMatD0=    1 NMtDS0=    0 NMtDT0=    0
 Symmetry not used in FoFCou.
 Leave Link  703 at Sat May 27 00:55:10 2023, MaxMem=  2684354560 cpu:             106.9 elap:              10.7
 (Enter /home/xut/apps/g16/l716.exe)
 Dipole        =-1.15450840D+01 1.49239005D+00-2.21033952D-01
 ***** Axes restored to original set *****
 -------------------------------------------------------------------
 Center     Atomic                   Forces (Hartrees/Bohr)
 Number     Number              X              Y              Z
 -------------------------------------------------------------------
      1        6           0.003896747    0.002685325    0.001102643
      2        6           0.000486799   -0.003887532   -0.000739736
      3        6          -0.001116872    0.000159604    0.000628442
      4        6          -0.003119958   -0.002895385   -0.000857893
      5        6          -0.003738184    0.004314283   -0.001248757
      6        6          -0.001909585   -0.001659897    0.002276145
      7        1           0.000254293    0.000538148   -0.000072525
      8        1          -0.001560700   -0.001399315    0.000580398
      9        6           0.001150511    0.002964996    0.000247525
     10        8           0.001054497   -0.001752314   -0.000108768
     11        1           0.000276449    0.001389267   -0.000148474
     12        8          -0.001779198   -0.000710905   -0.000599997
     13        8           0.006007672    0.003280118    0.001737834
     14        1          -0.001079386   -0.000000629   -0.001728811
     15        8           0.000640658    0.000271417   -0.000075239
     16        1           0.000424846   -0.001579865    0.000026801
     17        8          -0.002004849   -0.000083802   -0.001567901
     18        1           0.000221035   -0.000017140    0.000691033
     19       24           0.001895226   -0.001616374   -0.000142720
 -------------------------------------------------------------------
 Cartesian Forces:  Max     0.006007672 RMS     0.001881151
 Leave Link  716 at Sat May 27 00:55:10 2023, MaxMem=  2684354560 cpu:               0.1 elap:               0.0
 (Enter /home/xut/apps/g16/l103.exe)

 GradGradGradGradGradGradGradGradGradGradGradGradGradGradGradGradGradGrad
 Berny optimization.
 Using GEDIIS/GDIIS optimizer.
 FormGI is forming the generalized inverse of G from B-inverse, IUseBI=4.
 Internal  Forces:  Max     0.006939178 RMS     0.001563069
 Search for a local minimum.
 Step number   4 out of a maximum of   94
 All quantities printed in internal units (Hartrees-Bohrs-Radians)
 RMS Force = .15631D-02 SwitMx=.10000D-02 MixMth= 1
 Mixed Optimization -- RFO/linear search
 Update second derivatives using D2CorX and points    3    4
 DE= -2.63D-03 DEPred=-3.08D-03 R= 8.54D-01
 TightC=F SS=  1.41D+00  RLast= 4.73D-01 DXNew= 1.4270D+00 1.4189D+00
 Trust test= 8.54D-01 RLast= 4.73D-01 DXMaxT set to 1.42D+00
 ITU=  1  1  1  0
 Use linear search instead of GDIIS.
     Eigenvalues ---    0.00238   0.01095   0.01180   0.01296   0.01451
     Eigenvalues ---    0.01569   0.01790   0.01867   0.01960   0.02069
     Eigenvalues ---    0.02098   0.02122   0.02194   0.02291   0.02410
     Eigenvalues ---    0.02998   0.12390   0.15462   0.16000   0.16000
     Eigenvalues ---    0.16022   0.16202   0.16540   0.22159   0.23368
     Eigenvalues ---    0.23541   0.24075   0.24964   0.24992   0.24995
     Eigenvalues ---    0.24998   0.25263   0.28402   0.29405   0.36939
     Eigenvalues ---    0.37266   0.37537   0.41111   0.42118   0.44273
     Eigenvalues ---    0.44522   0.45181   0.45778   0.49957   0.52263
     Eigenvalues ---    0.55440   0.55473   0.55606   0.55701   0.66040
     Eigenvalues ---    0.81374
 RFO step:  Lambda=-1.02749211D-03 EMin= 2.38047815D-03
 Quartic linear search produced a step of -0.00304.
 Iteration  1 RMS(Cart)=  0.03441766 RMS(Int)=  0.00106102
 Iteration  2 RMS(Cart)=  0.00110450 RMS(Int)=  0.00019513
 Iteration  3 RMS(Cart)=  0.00000062 RMS(Int)=  0.00019513
 ITry= 1 IFail=0 DXMaxC= 1.71D-01 DCOld= 1.00D+10 DXMaxT= 1.42D+00 DXLimC= 3.00D+00 Rises=F
 Variable       Old X    -DE/DX   Delta X   Delta X   Delta X     New X
                                 (Linear)    (Quad)   (Total)
    R1        2.63352   0.00195  -0.00004   0.00541   0.00538   2.63890
    R2        2.74318  -0.00110  -0.00003  -0.00066  -0.00068   2.74250
    R3        2.46460   0.00078   0.00003  -0.00079  -0.00076   2.46384
    R4        2.60315  -0.00246   0.00002  -0.00617  -0.00614   2.59701
    R5        2.04584  -0.00030  -0.00000  -0.00018  -0.00018   2.04566
    R6        2.70157  -0.00139  -0.00001  -0.00172  -0.00174   2.69983
    R7        2.86365  -0.00200  -0.00002  -0.00641  -0.00643   2.85722
    R8        2.56343   0.00497   0.00002   0.00785   0.00786   2.57130
    R9        2.05273   0.00021   0.00001  -0.00004  -0.00004   2.05270
   R10        2.69230  -0.00187  -0.00002  -0.00343  -0.00345   2.68885
   R11        2.55654   0.00694   0.00004   0.01258   0.01262   2.56916
   R12        2.44225  -0.00064  -0.00008   0.00190   0.00182   2.44407
   R13        2.50647   0.00093  -0.00005   0.00388   0.00383   2.51030
   R14        2.27493   0.00184  -0.00002   0.00257   0.00255   2.27749
   R15        1.82542   0.00037   0.00001   0.00038   0.00039   1.82581
   R16        1.83862  -0.00089   0.00001  -0.00180  -0.00179   1.83683
   R17        4.00474   0.00248  -0.00001   0.01820   0.01819   4.02294
   R18        1.84917  -0.00153   0.00000  -0.00274  -0.00274   1.84643
   R19        1.83950  -0.00028   0.00001  -0.00079  -0.00079   1.83871
    A1        2.09489  -0.00023   0.00001  -0.00195  -0.00197   2.09292
    A2        2.20281  -0.00184  -0.00002  -0.00612  -0.00619   2.19661
    A3        1.98541   0.00207   0.00000   0.00829   0.00823   1.99364
    A4        2.07777   0.00012  -0.00002   0.00041   0.00040   2.07817
    A5        2.09106  -0.00061   0.00003  -0.00479  -0.00476   2.08629
    A6        2.11432   0.00049  -0.00001   0.00437   0.00435   2.11868
    A7        2.12729   0.00045   0.00001   0.00159   0.00153   2.12882
    A8        2.00864   0.00227   0.00003   0.00617   0.00617   2.01481
    A9        2.14702  -0.00271  -0.00004  -0.00742  -0.00748   2.13954
   A10        2.09401   0.00009   0.00000   0.00017   0.00013   2.09414
   A11        2.14983  -0.00221  -0.00004  -0.00996  -0.00998   2.13985
   A12        2.03934   0.00212   0.00004   0.00979   0.00985   2.04919
   A13        2.09936  -0.00153  -0.00004  -0.00293  -0.00300   2.09637
   A14        2.11529   0.00367   0.00005   0.00896   0.00902   2.12431
   A15        2.06802  -0.00214  -0.00002  -0.00605  -0.00606   2.06197
   A16        2.07286   0.00111   0.00003   0.00307   0.00302   2.07588
   A17        2.13912   0.00084  -0.00004   0.00606   0.00593   2.14505
   A18        2.07101  -0.00193   0.00001  -0.00868  -0.00876   2.06226
   A19        2.09401  -0.00367  -0.00003  -0.00992  -0.01015   2.08386
   A20        2.10252   0.00254  -0.00000   0.00805   0.00786   2.11038
   A21        2.08662   0.00113   0.00003   0.00218   0.00202   2.08865
   A22        2.01672  -0.00250  -0.00003  -0.01211  -0.01214   2.00459
   A23        1.98860  -0.00127  -0.00004   0.00322   0.00219   1.99080
   A24        2.19177   0.00160   0.00006   0.00701   0.00609   2.19786
   A25        2.05863   0.00014  -0.00003   0.01273   0.01169   2.07032
   A26        1.98686  -0.00115  -0.00003  -0.00926  -0.00929   1.97757
   A27        1.96840  -0.00003  -0.00002  -0.00304  -0.00306   1.96534
    D1        0.00455   0.00017  -0.00002   0.00956   0.00955   0.01410
    D2        3.13686   0.00016  -0.00000   0.00817   0.00818  -3.13815
    D3       -3.12249  -0.00028  -0.00001  -0.01101  -0.01096  -3.13344
    D4        0.00982  -0.00029   0.00001  -0.01240  -0.01233  -0.00251
    D5       -0.01829   0.00017   0.00002   0.00766   0.00771  -0.01058
    D6       -3.13829  -0.00029   0.00003  -0.01695  -0.01703   3.12786
    D7        3.11047   0.00054   0.00001   0.02569   0.02583   3.13630
    D8       -0.00954   0.00008   0.00002   0.00108   0.00109  -0.00845
    D9       -0.06277   0.00077  -0.00069   0.08103   0.08037   0.01760
   D10        3.09260   0.00036  -0.00068   0.06164   0.06094  -3.12965
   D11        0.00590  -0.00025   0.00000  -0.01375  -0.01374  -0.00784
   D12        3.12480   0.00002   0.00004   0.00247   0.00257   3.12737
   D13       -3.12629  -0.00023  -0.00001  -0.01229  -0.01229  -3.13858
   D14       -0.00739   0.00004   0.00002   0.00393   0.00403  -0.00336
   D15       -0.00223  -0.00004   0.00001  -0.00015  -0.00014  -0.00238
   D16        3.13932   0.00003   0.00002   0.00116   0.00114   3.14046
   D17       -3.11932  -0.00041  -0.00003  -0.01785  -0.01782  -3.13713
   D18        0.02224  -0.00034  -0.00002  -0.01655  -0.01653   0.00570
   D19       -3.07568  -0.00029  -0.00016   0.01286   0.01270  -3.06298
   D20        0.05615   0.00019  -0.00013   0.04914   0.04904   0.10519
   D21        0.04294   0.00003  -0.00013   0.02942   0.02926   0.07220
   D22       -3.10842   0.00051  -0.00010   0.06569   0.06560  -3.04282
   D23       -0.01207   0.00042  -0.00000   0.01805   0.01803   0.00595
   D24       -3.11875   0.00046  -0.00002   0.01913   0.01909  -3.09965
   D25        3.12956   0.00036  -0.00001   0.01682   0.01681  -3.13682
   D26        0.02288   0.00040  -0.00003   0.01791   0.01788   0.04076
   D27        0.02203  -0.00049  -0.00001  -0.02164  -0.02163   0.00040
   D28       -3.14030  -0.00001  -0.00002   0.00218   0.00211  -3.13819
   D29        3.12964  -0.00041   0.00001  -0.02240  -0.02236   3.10728
   D30       -0.03268   0.00006   0.00000   0.00142   0.00137  -0.03131
   D31       -2.80043  -0.00143   0.00023  -0.09566  -0.09553  -2.89596
   D32        0.01765   0.00022   0.00020  -0.01183  -0.01153   0.00612
   D33        0.37547  -0.00140   0.00021  -0.09465  -0.09453   0.28094
   D34       -3.08964   0.00025   0.00018  -0.01082  -0.01054  -3.10017
   D35       -0.00276   0.00018  -0.00065   0.03915   0.03848   0.03572
   D36       -3.12278  -0.00031  -0.00065   0.01442   0.01379  -3.10900
   D37        0.00744   0.00022  -0.00001   0.01902   0.01896   0.02640
   D38       -3.12448  -0.00026  -0.00004  -0.01696  -0.01695  -3.14143
         Item               Value     Threshold  Converged?
 Maximum Force            0.006939     0.000450     NO 
 RMS     Force            0.001563     0.000300     NO 
 Maximum Displacement     0.171342     0.001800     NO 
 RMS     Displacement     0.034360     0.001200     NO 
 Predicted change in Energy=-5.405432D-04
 Lowest energy point so far.  Saving SCF results.
 GradGradGradGradGradGradGradGradGradGradGradGradGradGradGradGradGradGrad

 Leave Link  103 at Sat May 27 00:55:10 2023, MaxMem=  2684354560 cpu:               0.2 elap:               0.0
 (Enter /home/xut/apps/g16/l202.exe)
                          Input orientation:                          
 ---------------------------------------------------------------------
 Center     Atomic      Atomic             Coordinates (Angstroms)
 Number     Number       Type             X           Y           Z
 ---------------------------------------------------------------------
      1          6           0       -1.597603    1.683079   -0.022195
      2          6           0       -2.203081    0.424807   -0.007679
      3          6           0       -1.410825   -0.696873    0.045275
      4          6           0        0.015178   -0.615064    0.076474
      5          6           0        0.627351    0.599853    0.051055
      6          6           0       -0.150476    1.790245    0.000744
      7          1           0       -3.282950    0.351954   -0.028182
      8          1           0        0.651110   -1.494648    0.119386
      9          6           0       -2.151766   -2.014477    0.076697
     10          8           0       -1.467449   -3.144133    0.218900
     11          1           0       -0.512970   -3.031086    0.317316
     12          8           0       -3.349329   -2.054666   -0.052627
     13          8           0        1.981645    0.717452    0.030844
     14          1           0        2.304791    1.612338    0.229736
     15          8           0        0.470519    2.924436   -0.025957
     16          1           0       -0.130932    3.694458   -0.030771
     17          8           0       -2.218387    2.828921   -0.062008
     18          1           0       -3.186334    2.729952   -0.065934
     19         24           0        3.375265   -0.891820    0.023745
 ---------------------------------------------------------------------
                    Distance matrix (angstroms):
                    1          2          3          4          5
     1  C    0.000000
     2  C    1.396447   0.000000
     3  C    2.388223   1.374278   0.000000
     4  C    2.809317   2.451344   1.428688   0.000000
     5  C    2.475716   2.836448   2.415718   1.360671   0.000000
     6  C    1.451271   2.465295   2.788587   2.412195   1.422877
     7  H    2.147632   1.082518   2.147158   3.438564   3.918953
     8  H    3.895473   3.441927   2.212128   1.086241   2.095750
     9  C    3.740161   2.441282   1.511973   2.579536   3.815609
    10  O    4.834982   3.651004   2.454065   2.935074   4.293459
    11  H    4.849233   3.860738   2.515691   2.484776   3.815095
    12  O    4.127979   2.731975   2.368752   3.661834   4.782385
    13  O    3.707596   4.195123   3.675510   2.375852   1.359540
    14  H    3.911158   4.667709   4.378616   3.197989   1.967449
    15  O    2.412076   3.660139   4.081471   3.570138   2.331140
    16  H    2.489346   3.871040   4.574680   4.313331   3.187204
    17  O    1.303806   2.404776   3.618686   4.107191   3.616594
    18  H    1.903135   2.506766   3.861079   4.632396   4.369806
    19  Cr   5.600146   5.731705   4.790107   3.371878   3.126798
                    6          7          8          9         10
     6  C    0.000000
     7  H    3.447014   0.000000
     8  H    3.383362   4.348395   0.000000
     9  C    4.299632   2.624990   2.850993   0.000000
    10  O    5.111761   3.947116   2.686819   1.328396   0.000000
    11  H    4.845292   4.386014   1.937757   1.943462   0.966175
    12  O    5.001884   2.407659   4.043107   1.205195   2.191378
    13  O    2.386992   5.277597   2.582934   4.954859   5.181067
    14  H    2.472332   5.733929   3.521392   5.747879   6.070743
    15  O    1.293344   4.550406   4.425160   5.592833   6.375203
    16  H    1.904574   4.594296   5.249853   6.057001   6.972442
    17  O    2.314960   2.696257   5.192318   4.845842   6.026624
    18  H    3.178668   2.380259   5.710303   4.858012   6.127036
    19  Cr   4.429995   6.773589   2.791697   5.640145   5.344425
                   11         12         13         14         15
    11  H    0.000000
    12  O    3.022447   0.000000
    13  O    4.511841   6.009233   0.000000
    14  H    5.432203   6.745051   0.972009   0.000000
    15  O    6.045935   6.275620   2.675352   2.269700   0.000000
    16  H    6.745374   6.588701   3.650937   3.214939   0.977087
    17  O    6.114901   5.012837   4.701828   4.693009   2.690843
    18  H    6.362650   4.787412   5.546848   5.611500   3.662239
    19  Cr   4.447586   6.824823   2.128846   2.731145   4.796231
                   16         17         18         19
    16  H    0.000000
    17  O    2.260000   0.000000
    18  H    3.204214   0.973001   0.000000
    19  Cr   5.773243   6.718647   7.495323   0.000000
 Stoichiometry    C7H6CrO5(3+,4)
 Framework group  C1[X(C7H6CrO5)]
 Deg. of freedom    51
 Full point group                 C1      NOp   1
 RotChk:  IX=2 Diff= 7.34D-03
 Largest Abelian subgroup         C1      NOp   1
 Largest concise Abelian subgroup C1      NOp   1
                         Standard orientation:                         
 ---------------------------------------------------------------------
 Center     Atomic      Atomic             Coordinates (Angstroms)
 Number     Number       Type             X           Y           Z
 ---------------------------------------------------------------------
      1          6           0        1.618161    1.658237    0.002910
      2          6           0        2.201155    0.389399    0.018204
      3          6           0        1.388910   -0.718950   -0.003249
      4          6           0       -0.035533   -0.612531   -0.031258
      5          6           0       -0.625945    0.613368   -0.034523
      6          6           0        0.173081    1.790586   -0.017408
      7          1           0        3.279637    0.297836    0.036570
      8          1           0       -0.687143   -1.481436   -0.049412
      9          6           0        2.106223   -2.049937   -0.003845
     10          8           0        1.401387   -3.170451   -0.114712
     11          1           0        0.448665   -3.042929   -0.212452
     12          8           0        3.303409   -2.108188    0.122039
     13          8           0       -1.977844    0.755586   -0.012314
     14          1           0       -2.285884    1.650755   -0.232734
     15          8           0       -0.427578    2.935989   -0.017304
     16          1           0        0.187454    3.695031   -0.034318
     17          8           0        2.259336    2.793462    0.011244
     18          1           0        3.225383    2.677371    0.014117
     19         24           0       -3.399755   -0.827868    0.040901
 ---------------------------------------------------------------------
 Rotational constants (GHZ):           0.7078118           0.4390364           0.2711625
 Leave Link  202 at Sat May 27 00:55:10 2023, MaxMem=  2684354560 cpu:               0.1 elap:               0.0
 (Enter /home/xut/apps/g16/l301.exe)
 Basis read from rwf:  (5D, 7F)
 Pseudo-potential data read from rwf file.
 There are   342 symmetry adapted cartesian basis functions of A   symmetry.
 There are   328 symmetry adapted basis functions of A   symmetry.
   328 basis functions,   538 primitive gaussians,   342 cartesian basis functions
    51 alpha electrons       48 beta electrons
       nuclear repulsion energy       840.6175326432 Hartrees.
 IExCor= 4336 DFT=T Ex+Corr=M062X ExCW=0 ScaHFX=  0.540000
 ScaDFX=  1.000000  1.000000  1.000000  1.000000 ScalE2=  1.000000  1.000000
 IRadAn=      5 IRanWt=     -1 IRanGd=            0 ICorTp=0 IEmpDi=  4
 NAtoms=   19 NActive=   19 NUniq=   19 SFac= 1.00D+00 NAtFMM=   60 NAOKFM=F Big=F
 Integral buffers will be    131072 words long.
 Raffenetti 2 integral format.
 Two-electron integral symmetry is turned on.
 No density basis found on file   724.
 ------------------------------------------------------------------------------
 Polarizable Continuum Model (PCM)
 =================================
 Model                : PCM.
 Atomic radii         : SMD-Coulomb.
 Polarization charges : Total charges.
 Charge compensation  : None.
 Solution method      : On-the-fly selection.
 Cavity type          : VdW (van der Waals Surface) (Alpha=1.000).
 Cavity algorithm     : GePol (No added spheres)
                        Default sphere list used, NSphG=   19.
                        Lebedev-Laikov grids with approx.  5.0 points / Ang**2.
                        Smoothing algorithm: York/Karplus (Gamma=1.0000).
                        Polarization charges: spherical gaussians, with
                                              point-specific exponents (IZeta= 3).
                        Self-potential: point-specific (ISelfS= 7).
                        Self-field    : sphere-specific E.n sum rule (ISelfD= 2).
 1st derivatives      : Analytical E(r).r(x)/FMM algorithm (CHGder, D1EAlg=3).
                        Cavity 1st derivative terms included.
 Solvent              : Water, Eps=  78.355300 Eps(inf)=   1.777849
 ------------------------------------------------------------------------------
 Spheres list:
 ISph  on   Nord     Re0    Alpha      Xe            Ye            Ze
    1   C      1    1.8500  1.000      1.618161      1.658237      0.002910
    2   C      2    1.8500  1.000      2.201155      0.389399      0.018204
    3   C      3    1.8500  1.000      1.388910     -0.718950     -0.003249
    4   C      4    1.8500  1.000     -0.035533     -0.612531     -0.031258
    5   C      5    1.8500  1.000     -0.625945      0.613368     -0.034523
    6   C      6    1.8500  1.000      0.173081      1.790586     -0.017408
    7   H      7    1.2000  1.000      3.279637      0.297836      0.036570
    8   H      8    1.2000  1.000     -0.687143     -1.481436     -0.049412
    9   C      9    1.8500  1.000      2.106223     -2.049937     -0.003845
   10   O     10    1.5200  1.000      1.401387     -3.170451     -0.114712
   11   H     11    1.2000  1.000      0.448665     -3.042929     -0.212452
   12   O     12    1.5200  1.000      3.303409     -2.108188      0.122039
   13   O     13    1.5200  1.000     -1.977844      0.755586     -0.012314
   14   H     14    1.2000  1.000     -2.285884      1.650755     -0.232734
   15   O     15    1.5200  1.000     -0.427578      2.935989     -0.017304
   16   H     16    1.2000  1.000      0.187454      3.695031     -0.034318
   17   O     17    1.5200  1.000      2.259336      2.793462      0.011244
   18   H     18    1.2000  1.000      3.225383      2.677371      0.014117
   19  Cr     19    1.5115  1.000     -3.399755     -0.827868      0.040901
 ------------------------------------------------------------------------------
 GePol: Number of generator spheres                  =      19
 GePol: Total number of spheres                      =      19
 GePol: Number of exposed spheres                    =      19 (100.00%)
 GePol: Number of points                             =    1461
 GePol: Average weight of points                     =       0.13
 GePol: Minimum weight of points                     =   0.19D-07
 GePol: Maximum weight of points                     =    0.21991
 GePol: Number of points with low weight             =      68
 GePol: Fraction of low-weight points (<1% of avg)   =       4.65%
 GePol: Cavity surface area                          =    188.098 Ang**2
 GePol: Cavity volume                                =    155.196 Ang**3
 ------------------------------------------------------------------------------
 Atomic radii for non-electrostatic terms: SMD-CDS.
 ------------------------------------------------------------------------------
 PCM non-electrostatic energy =         0.0107787523 Hartrees.
 Nuclear repulsion after PCM non-electrostatic terms =      840.6283113954 Hartrees.
 Leave Link  301 at Sat May 27 00:55:10 2023, MaxMem=  2684354560 cpu:               0.5 elap:               0.1
 (Enter /home/xut/apps/g16/l302.exe)
 NPDir=0 NMtPBC=     1 NCelOv=     1 NCel=       1 NClECP=     1 NCelD=      1
         NCelK=      1 NCelE2=     1 NClLst=     1 CellRange=     0.0.
 One-electron integrals computed using PRISM.
 One-electron integral symmetry used in STVInt
   1 Symmetry operations used in ECPInt.
 ECPInt:  NShTT=    6105 NPrTT=   23469 LenC2=    5814 LenP2D=   15870.
 LDataN:  DoStor=T MaxTD1= 4 Len=   56
 NBasis=   328 RedAO= T EigKep=  1.16D-06  NBF=   328
 NBsUse=   327 1.00D-06 EigRej=  6.82D-07 NBFU=   327
 Precomputing XC quadrature grid using
 IXCGrd= 4 IRadAn=           5 IRanWt=          -1 IRanGd=           0 AccXCQ= 0.00D+00.
 Generated NRdTot=       0 NPtTot=           0 NUsed=           0 NTot=          32
 NSgBfM=   342   342   342   342   342 MxSgAt=    19 MxSgA2=    19.
 Leave Link  302 at Sat May 27 00:55:11 2023, MaxMem=  2684354560 cpu:               2.1 elap:               0.2
 (Enter /home/xut/apps/g16/l303.exe)
 DipDrv:  MaxL=1.
 Leave Link  303 at Sat May 27 00:55:11 2023, MaxMem=  2684354560 cpu:               0.3 elap:               0.0
 (Enter /home/xut/apps/g16/l401.exe)
 Initial guess from the checkpoint file:  "149-91-7-meta13-Cr.chk"
 B after Tr=     0.000000   -0.000000   -0.000000
         Rot=    1.000000   -0.000055    0.000024   -0.000936 Ang=  -0.11 deg.
 Guess basis will be translated and rotated to current coordinates.
 JPrj=2 DoOrth=T DoCkMO=T.
 Initial guess <Sx>= 0.0000 <Sy>= 0.0000 <Sz>= 1.5000 <S**2>= 4.7661 S= 1.7397
 Generating alternative initial guess.
 ExpMin= 1.90D-02 ExpMax= 8.59D+03 ExpMxC= 1.30D+03 IAcc=3 IRadAn=         5 AccDes= 0.00D+00
 Harris functional with IExCor= 1009 and IRadAn=       5 diagonalized for initial guess.
 HarFok:  IExCor= 1009 AccDes= 0.00D+00 IRadAn=         5 IDoV= 1 UseB2=F ITyADJ=14
 ICtDFT=  3500011 ScaDFX=  1.000000  1.000000  1.000000  1.000000
 FoFCou: FMM=F IPFlag=           0 FMFlag=      100000 FMFlg1=           0
         NFxFlg=           0 DoJE=T BraDBF=F KetDBF=T FulRan=T
         wScrn=  0.000000 ICntrl=       500 IOpCl=  0 I1Cent=   200000004 NGrid=           0
         NMat0=    1 NMatS0=      1 NMatT0=    0 NMatD0=    1 NMtDS0=    0 NMtDT0=    0
 Petite list used in FoFCou.
 Harris En= -732.136783115961    
 Leave Link  401 at Sat May 27 00:55:12 2023, MaxMem=  2684354560 cpu:               9.4 elap:               1.0
 (Enter /home/xut/apps/g16/l502.exe)
 Integral symmetry usage will be decided dynamically.
 UHF open shell SCF:
 Using DIIS extrapolation, IDIIS=  1040.
 NGot=  2684354560 LenX=  2684113999 LenY=  2683996594
 Requested convergence on RMS density matrix=1.00D-06 within 128 cycles.
 Requested convergence on MAX density matrix=1.00D-04.
 Requested convergence on             energy=1.00D-04.
 No special actions if energy rises.
 Fock matrices will be formed incrementally for  20 cycles.

 Cycle   1  Pass 1  IDiag  1:
 FoFJK:  IHMeth= 1 ICntrl=       0 DoSepK=F KAlg= 0 I1Cent=           0 FoldK=F
 IRaf= 910000000 NMat=       1 IRICut=       1 DoRegI=T DoRafI=F ISym2E= 0 IDoP0=0 IntGTp=1.
 FoFCou: FMM=F IPFlag=           0 FMFlag=      100000 FMFlg1=           0
         NFxFlg=           0 DoJE=F BraDBF=F KetDBF=F FulRan=T
         wScrn=  0.000000 ICntrl=         0 IOpCl=  1 I1Cent=           0 NGrid=           0
         NMat0=    1 NMatS0=      1 NMatT0=    0 NMatD0=    1 NMtDS0=    0 NMtDT0=    0
 Symmetry not used in FoFCou.
 Inv3:  Mode=1 IEnd=     6403563.
 Iteration    1 A*A^-1 deviation from unit magnitude is 2.66D-15 for     34.
 Iteration    1 A*A^-1 deviation from orthogonality  is 2.41D-15 for   1125    726.
 Iteration    1 A^-1*A deviation from unit magnitude is 2.66D-15 for    952.
 Iteration    1 A^-1*A deviation from orthogonality  is 3.06D-15 for    735      3.
 E= -732.294780590620    
 DIIS: error= 2.23D-03 at cycle   1 NSaved=   1.
 NSaved= 1 IEnMin= 1 EnMin= -732.294780590620     IErMin= 1 ErrMin= 2.23D-03
 ErrMax= 2.23D-03  0.00D+00 EMaxC= 1.00D-01 BMatC= 1.62D-02 BMatP= 1.62D-02
 IDIUse=3 WtCom= 9.78D-01 WtEn= 2.23D-02
 Coeff-Com:  0.100D+01
 Coeff-En:   0.100D+01
 Coeff:      0.100D+01
 Gap=     0.462 Goal=   None    Shift=    0.000
 Gap=     0.465 Goal=   None    Shift=    0.000
 GapD=    0.462 DampG=2.000 DampE=1.000 DampFc=2.0000 IDamp=-1.
 RMSDP=8.25D-03 MaxDP=7.46D-01              OVMax= 1.68D-02

 Cycle   2  Pass 1  IDiag  1:
 RMSU=  7.66D-03    CP:  1.03D+00
 E= -732.300518040004     Delta-E=       -0.005737449384 Rises=F Damp=F
 DIIS: error= 5.31D-04 at cycle   2 NSaved=   2.
 NSaved= 2 IEnMin= 2 EnMin= -732.300518040004     IErMin= 2 ErrMin= 5.31D-04
 ErrMax= 5.31D-04  0.00D+00 EMaxC= 1.00D-01 BMatC= 6.26D-04 BMatP= 1.62D-02
 IDIUse=3 WtCom= 9.95D-01 WtEn= 5.31D-03
 Coeff-Com: -0.115D+00 0.111D+01
 Coeff-En:   0.000D+00 0.100D+01
 Coeff:     -0.114D+00 0.111D+01
 Gap=     0.157 Goal=   None    Shift=    0.000
 Gap=     0.275 Goal=   None    Shift=    0.000
 RMSDP=9.41D-04 MaxDP=4.87D-02 DE=-5.74D-03 OVMax= 5.62D-03

 Cycle   3  Pass 1  IDiag  1:
 RMSU=  6.45D-04    CP:  1.03D+00  1.09D+00
 E= -732.300742086901     Delta-E=       -0.000224046898 Rises=F Damp=F
 DIIS: error= 3.50D-04 at cycle   3 NSaved=   3.
 NSaved= 3 IEnMin= 3 EnMin= -732.300742086901     IErMin= 3 ErrMin= 3.50D-04
 ErrMax= 3.50D-04  0.00D+00 EMaxC= 1.00D-01 BMatC= 3.58D-04 BMatP= 6.26D-04
 IDIUse=3 WtCom= 9.96D-01 WtEn= 3.50D-03
 Coeff-Com: -0.773D-01 0.527D+00 0.550D+00
 Coeff-En:   0.000D+00 0.000D+00 0.100D+01
 Coeff:     -0.771D-01 0.525D+00 0.552D+00
 Gap=     0.157 Goal=   None    Shift=    0.000
 Gap=     0.275 Goal=   None    Shift=    0.000
 RMSDP=6.59D-04 MaxDP=1.32D-01 DE=-2.24D-04 OVMax= 2.64D-03

 Cycle   4  Pass 1  IDiag  1:
 RMSU=  3.64D-04    CP:  1.04D+00  1.09D+00  7.36D-01
 E= -732.300809935687     Delta-E=       -0.000067848786 Rises=F Damp=F
 DIIS: error= 9.89D-05 at cycle   4 NSaved=   4.
 NSaved= 4 IEnMin= 4 EnMin= -732.300809935687     IErMin= 4 ErrMin= 9.89D-05
 ErrMax= 9.89D-05  0.00D+00 EMaxC= 1.00D-01 BMatC= 2.00D-05 BMatP= 3.58D-04
 IDIUse=1 WtCom= 1.00D+00 WtEn= 0.00D+00
 Coeff-Com:  0.273D-04-0.530D-01 0.149D+00 0.904D+00
 Coeff:      0.273D-04-0.530D-01 0.149D+00 0.904D+00
 Gap=     0.157 Goal=   None    Shift=    0.000
 Gap=     0.275 Goal=   None    Shift=    0.000
 RMSDP=9.62D-05 MaxDP=1.47D-02 DE=-6.78D-05 OVMax= 1.62D-03

 Cycle   5  Pass 1  IDiag  1:
 RMSU=  4.90D-05    CP:  1.04D+00  1.09D+00  7.73D-01  9.14D-01
 E= -732.300816414443     Delta-E=       -0.000006478756 Rises=F Damp=F
 DIIS: error= 3.89D-05 at cycle   5 NSaved=   5.
 NSaved= 5 IEnMin= 5 EnMin= -732.300816414443     IErMin= 5 ErrMin= 3.89D-05
 ErrMax= 3.89D-05  0.00D+00 EMaxC= 1.00D-01 BMatC= 2.83D-06 BMatP= 2.00D-05
 IDIUse=1 WtCom= 1.00D+00 WtEn= 0.00D+00
 Coeff-Com:  0.487D-02-0.575D-01 0.265D-01 0.385D+00 0.642D+00
 Coeff:      0.487D-02-0.575D-01 0.265D-01 0.385D+00 0.642D+00
 Gap=     0.157 Goal=   None    Shift=    0.000
 Gap=     0.275 Goal=   None    Shift=    0.000
 RMSDP=2.28D-05 MaxDP=1.42D-03 DE=-6.48D-06 OVMax= 7.96D-04

 Cycle   6  Pass 1  IDiag  1:
 RMSU=  1.93D-05    CP:  1.04D+00  1.09D+00  7.72D-01  9.12D-01  1.06D+00
 E= -732.300817497363     Delta-E=       -0.000001082920 Rises=F Damp=F
 DIIS: error= 3.79D-05 at cycle   6 NSaved=   6.
 NSaved= 6 IEnMin= 6 EnMin= -732.300817497363     IErMin= 6 ErrMin= 3.79D-05
 ErrMax= 3.79D-05  0.00D+00 EMaxC= 1.00D-01 BMatC= 5.60D-07 BMatP= 2.83D-06
 IDIUse=1 WtCom= 1.00D+00 WtEn= 0.00D+00
 Coeff-Com:  0.241D-02-0.192D-01-0.149D-01 0.255D-01 0.277D+00 0.729D+00
 Coeff:      0.241D-02-0.192D-01-0.149D-01 0.255D-01 0.277D+00 0.729D+00
 Gap=     0.157 Goal=   None    Shift=    0.000
 Gap=     0.275 Goal=   None    Shift=    0.000
 RMSDP=2.14D-05 MaxDP=3.69D-03 DE=-1.08D-06 OVMax= 8.07D-04

 Cycle   7  Pass 1  IDiag  1:
 RMSU=  8.25D-06    CP:  1.04D+00  1.09D+00  7.57D-01  9.25D-01  1.31D+00
                    CP:  1.29D+00
 E= -732.300818031897     Delta-E=       -0.000000534534 Rises=F Damp=F
 DIIS: error= 3.05D-05 at cycle   7 NSaved=   7.
 NSaved= 7 IEnMin= 7 EnMin= -732.300818031897     IErMin= 7 ErrMin= 3.05D-05
 ErrMax= 3.05D-05  0.00D+00 EMaxC= 1.00D-01 BMatC= 1.74D-07 BMatP= 5.60D-07
 IDIUse=1 WtCom= 1.00D+00 WtEn= 0.00D+00
 Coeff-Com: -0.281D-03 0.598D-02-0.957D-02-0.629D-01-0.534D-01 0.171D+00
 Coeff-Com:  0.949D+00
 Coeff:     -0.281D-03 0.598D-02-0.957D-02-0.629D-01-0.534D-01 0.171D+00
 Coeff:      0.949D+00
 Gap=     0.157 Goal=   None    Shift=    0.000
 Gap=     0.275 Goal=   None    Shift=    0.000
 RMSDP=1.87D-05 MaxDP=3.42D-03 DE=-5.35D-07 OVMax= 9.36D-04

 Cycle   8  Pass 1  IDiag  1:
 RMSU=  4.64D-06    CP:  1.04D+00  1.09D+00  7.44D-01  9.32D-01  1.48D+00
                    CP:  1.59D+00  1.88D+00
 E= -732.300818484149     Delta-E=       -0.000000452252 Rises=F Damp=F
 DIIS: error= 2.53D-05 at cycle   8 NSaved=   8.
 NSaved= 8 IEnMin= 8 EnMin= -732.300818484149     IErMin= 8 ErrMin= 2.53D-05
 ErrMax= 2.53D-05  0.00D+00 EMaxC= 1.00D-01 BMatC= 1.25D-07 BMatP= 1.74D-07
 IDIUse=1 WtCom= 1.00D+00 WtEn= 0.00D+00
 Coeff-Com: -0.101D-02 0.940D-02 0.190D-02-0.244D-01-0.124D+00-0.239D+00
 Coeff-Com:  0.361D+00 0.102D+01
 Coeff:     -0.101D-02 0.940D-02 0.190D-02-0.244D-01-0.124D+00-0.239D+00
 Coeff:      0.361D+00 0.102D+01
 Gap=     0.157 Goal=   None    Shift=    0.000
 Gap=     0.275 Goal=   None    Shift=    0.000
 RMSDP=2.25D-05 MaxDP=4.15D-03 DE=-4.52D-07 OVMax= 1.03D-03

 Cycle   9  Pass 1  IDiag  1:
 RMSU=  3.08D-06    CP:  1.04D+00  1.09D+00  7.28D-01  9.41D-01  1.66D+00
                    CP:  1.94D+00  3.00D+00  2.09D+00
 E= -732.300818919940     Delta-E=       -0.000000435791 Rises=F Damp=F
 DIIS: error= 1.88D-05 at cycle   9 NSaved=   9.
 NSaved= 9 IEnMin= 9 EnMin= -732.300818919940     IErMin= 9 ErrMin= 1.88D-05
 ErrMax= 1.88D-05  0.00D+00 EMaxC= 1.00D-01 BMatC= 7.93D-08 BMatP= 1.25D-07
 IDIUse=1 WtCom= 1.00D+00 WtEn= 0.00D+00
 Coeff-Com:  0.209D-03-0.517D-02 0.697D-02 0.617D-01 0.395D-01-0.187D+00
 Coeff-Com: -0.817D+00-0.122D+00 0.202D+01
 Coeff:      0.209D-03-0.517D-02 0.697D-02 0.617D-01 0.395D-01-0.187D+00
 Coeff:     -0.817D+00-0.122D+00 0.202D+01
 Gap=     0.157 Goal=   None    Shift=    0.000
 Gap=     0.275 Goal=   None    Shift=    0.000
 RMSDP=4.75D-05 MaxDP=8.94D-03 DE=-4.36D-07 OVMax= 2.04D-03

 Cycle  10  Pass 1  IDiag  1:
 RMSU=  2.14D-05    CP:  1.04D+00  1.09D+00  6.95D-01  9.61D-01  2.04D+00
                    CP:  2.61D+00  3.00D+00  3.00D+00  3.00D+00
 E= -732.300819575193     Delta-E=       -0.000000655254 Rises=F Damp=F
 DIIS: error= 8.03D-06 at cycle  10 NSaved=  10.
 NSaved=10 IEnMin=10 EnMin= -732.300819575193     IErMin=10 ErrMin= 8.03D-06
 ErrMax= 8.03D-06  0.00D+00 EMaxC= 1.00D-01 BMatC= 4.24D-08 BMatP= 7.93D-08
 IDIUse=1 WtCom= 1.00D+00 WtEn= 0.00D+00
 Coeff-Com:  0.601D-03-0.708D-02 0.128D-02 0.390D-01 0.790D-01 0.407D-01
 Coeff-Com: -0.513D+00-0.595D+00 0.924D+00 0.103D+01
 Coeff:      0.601D-03-0.708D-02 0.128D-02 0.390D-01 0.790D-01 0.407D-01
 Coeff:     -0.513D+00-0.595D+00 0.924D+00 0.103D+01
 Gap=     0.157 Goal=   None    Shift=    0.000
 Gap=     0.275 Goal=   None    Shift=    0.000
 RMSDP=3.22D-05 MaxDP=6.14D-03 DE=-6.55D-07 OVMax= 1.18D-03

 Cycle  11  Pass 1  IDiag  1:
 RMSU=  6.46D-06    CP:  1.04D+00  1.09D+00  6.73D-01  9.74D-01  2.27D+00
                    CP:  3.00D+00  3.00D+00  3.00D+00  3.00D+00  1.79D+00
 E= -732.300819849706     Delta-E=       -0.000000274513 Rises=F Damp=F
 DIIS: error= 7.13D-06 at cycle  11 NSaved=  11.
 NSaved=11 IEnMin=11 EnMin= -732.300819849706     IErMin=11 ErrMin= 7.13D-06
 ErrMax= 7.13D-06  0.00D+00 EMaxC= 1.00D-01 BMatC= 2.62D-08 BMatP= 4.24D-08
 IDIUse=1 WtCom= 1.00D+00 WtEn= 0.00D+00
 Coeff-Com:  0.736D-04-0.205D-04-0.185D-02-0.973D-02 0.274D-02 0.638D-01
 Coeff-Com:  0.132D+00-0.107D+00-0.430D+00 0.182D+00 0.117D+01
 Coeff:      0.736D-04-0.205D-04-0.185D-02-0.973D-02 0.274D-02 0.638D-01
 Coeff:      0.132D+00-0.107D+00-0.430D+00 0.182D+00 0.117D+01
 Gap=     0.157 Goal=   None    Shift=    0.000
 Gap=     0.275 Goal=   None    Shift=    0.000
 RMSDP=2.35D-05 MaxDP=4.28D-03 DE=-2.75D-07 OVMax= 7.28D-04

 Cycle  12  Pass 1  IDiag  1:
 RMSU=  5.87D-06    CP:  1.04D+00  1.09D+00  6.57D-01  9.82D-01  2.45D+00
                    CP:  3.00D+00  3.00D+00  3.00D+00  3.00D+00  2.38D+00
                    CP:  1.95D+00
 E= -732.300819998832     Delta-E=       -0.000000149126 Rises=F Damp=F
 DIIS: error= 6.40D-06 at cycle  12 NSaved=  12.
 NSaved=12 IEnMin=12 EnMin= -732.300819998832     IErMin=12 ErrMin= 6.40D-06
 ErrMax= 6.40D-06  0.00D+00 EMaxC= 1.00D-01 BMatC= 2.17D-08 BMatP= 2.62D-08
 IDIUse=1 WtCom= 1.00D+00 WtEn= 0.00D+00
 Coeff-Com: -0.371D-03 0.463D-02-0.126D-02-0.275D-01-0.512D-01-0.389D-02
 Coeff-Com:  0.367D+00 0.375D+00-0.692D+00-0.684D+00 0.476D+00 0.124D+01
 Coeff:     -0.371D-03 0.463D-02-0.126D-02-0.275D-01-0.512D-01-0.389D-02
 Coeff:      0.367D+00 0.375D+00-0.692D+00-0.684D+00 0.476D+00 0.124D+01
 Gap=     0.157 Goal=   None    Shift=    0.000
 Gap=     0.275 Goal=   None    Shift=    0.000
 RMSDP=1.98D-05 MaxDP=3.50D-03 DE=-1.49D-07 OVMax= 6.66D-04

 Cycle  13  Pass 1  IDiag  1:
 RMSU=  2.16D-06    CP:  1.04D+00  1.09D+00  6.44D-01  9.87D-01  2.58D+00
                    CP:  3.00D+00  3.00D+00  3.00D+00  3.00D+00  2.88D+00
                    CP:  2.94D+00  1.96D+00
 E= -732.300820122493     Delta-E=       -0.000000123661 Rises=F Damp=F
 DIIS: error= 5.78D-06 at cycle  13 NSaved=  13.
 NSaved=13 IEnMin=13 EnMin= -732.300820122493     IErMin=13 ErrMin= 5.78D-06
 ErrMax= 5.78D-06  0.00D+00 EMaxC= 1.00D-01 BMatC= 1.67D-08 BMatP= 2.17D-08
 IDIUse=1 WtCom= 1.00D+00 WtEn= 0.00D+00
 Coeff-Com:  0.172D-03-0.310D-02 0.332D-02 0.280D-01 0.328D-01-0.720D-01
 Coeff-Com: -0.428D+00-0.106D+00 0.953D+00 0.169D+00-0.137D+01-0.123D+01
 Coeff-Com:  0.301D+01
 Coeff:      0.172D-03-0.310D-02 0.332D-02 0.280D-01 0.328D-01-0.720D-01
 Coeff:     -0.428D+00-0.106D+00 0.953D+00 0.169D+00-0.137D+01-0.123D+01
 Coeff:      0.301D+01
 Gap=     0.157 Goal=   None    Shift=    0.000
 Gap=     0.275 Goal=   None    Shift=    0.000
 RMSDP=4.58D-05 MaxDP=7.94D-03 DE=-1.24D-07 OVMax= 1.51D-03

 Cycle  14  Pass 1  IDiag  1:
 RMSU=  2.74D-05    CP:  1.04D+00  1.09D+00  6.13D-01  1.00D+00  2.91D+00
                    CP:  3.00D+00  3.00D+00  3.00D+00  3.00D+00  3.00D+00
                    CP:  3.00D+00  3.00D+00  3.00D+00
 E= -732.300820359872     Delta-E=       -0.000000237379 Rises=F Damp=F
 DIIS: error= 4.29D-06 at cycle  14 NSaved=  14.
 NSaved=14 IEnMin=14 EnMin= -732.300820359872     IErMin=14 ErrMin= 4.29D-06
 ErrMax= 4.29D-06  0.00D+00 EMaxC= 1.00D-01 BMatC= 1.13D-08 BMatP= 1.67D-08
 IDIUse=1 WtCom= 1.00D+00 WtEn= 0.00D+00
 Coeff-Com:  0.446D-03-0.617D-02 0.324D-02 0.402D-01 0.695D-01-0.312D-01
 Coeff-Com: -0.609D+00-0.413D+00 0.120D+01 0.742D+00-0.113D+01-0.199D+01
 Coeff-Com:  0.169D+01 0.143D+01
 Coeff:      0.446D-03-0.617D-02 0.324D-02 0.402D-01 0.695D-01-0.312D-01
 Coeff:     -0.609D+00-0.413D+00 0.120D+01 0.742D+00-0.113D+01-0.199D+01
 Coeff:      0.169D+01 0.143D+01
 Gap=     0.157 Goal=   None    Shift=    0.000
 Gap=     0.275 Goal=   None    Shift=    0.000
 RMSDP=5.19D-05 MaxDP=8.97D-03 DE=-2.37D-07 OVMax= 1.70D-03

 Cycle  15  Pass 1  IDiag  1:
 RMSU=  1.61D-05    CP:  1.04D+00  1.10D+00  5.79D-01  1.01D+00  3.00D+00
                    CP:  3.00D+00  3.00D+00  3.00D+00  3.00D+00  3.00D+00
                    CP:  3.00D+00  3.00D+00  3.00D+00  2.31D+00
 E= -732.300820549218     Delta-E=       -0.000000189346 Rises=F Damp=F
 DIIS: error= 2.48D-06 at cycle  15 NSaved=  15.
 NSaved=15 IEnMin=15 EnMin= -732.300820549218     IErMin=15 ErrMin= 2.48D-06
 ErrMax= 2.48D-06  0.00D+00 EMaxC= 1.00D-01 BMatC= 5.30D-09 BMatP= 1.13D-08
 IDIUse=1 WtCom= 1.00D+00 WtEn= 0.00D+00
 Coeff-Com:  0.108D-03-0.774D-03-0.980D-03-0.354D-02 0.122D-01 0.541D-01
 Coeff-Com:  0.430D-01-0.134D+00-0.228D+00 0.301D+00 0.655D+00-0.414D-01
 Coeff-Com: -0.186D+01 0.729D+00 0.147D+01
 Coeff:      0.108D-03-0.774D-03-0.980D-03-0.354D-02 0.122D-01 0.541D-01
 Coeff:      0.430D-01-0.134D+00-0.228D+00 0.301D+00 0.655D+00-0.414D-01
 Coeff:     -0.186D+01 0.729D+00 0.147D+01
 Gap=     0.157 Goal=   None    Shift=    0.000
 Gap=     0.275 Goal=   None    Shift=    0.000
 RMSDP=5.84D-05 MaxDP=9.94D-03 DE=-1.89D-07 OVMax= 1.92D-03

 Cycle  16  Pass 1  IDiag  1:
 RMSU=  2.18D-05    CP:  1.04D+00  1.10D+00  5.40D-01  1.03D+00  3.00D+00
                    CP:  3.00D+00  3.00D+00  3.00D+00  3.00D+00  3.00D+00
                    CP:  3.00D+00  3.00D+00  3.00D+00  3.00D+00  2.42D+00
 E= -732.300820657199     Delta-E=       -0.000000107981 Rises=F Damp=F
 DIIS: error= 1.19D-06 at cycle  16 NSaved=  16.
 NSaved=16 IEnMin=16 EnMin= -732.300820657199     IErMin=16 ErrMin= 1.19D-06
 ErrMax= 1.19D-06  0.00D+00 EMaxC= 1.00D-01 BMatC= 1.10D-09 BMatP= 5.30D-09
 IDIUse=1 WtCom= 1.00D+00 WtEn= 0.00D+00
 Coeff-Com: -0.946D-04 0.145D-02-0.827D-03-0.111D-01-0.141D-01 0.164D-01
 Coeff-Com:  0.164D+00 0.959D-01-0.359D+00-0.120D+00 0.352D+00 0.566D+00
 Coeff-Com: -0.790D+00-0.266D+00 0.291D+00 0.108D+01
 Coeff:     -0.946D-04 0.145D-02-0.827D-03-0.111D-01-0.141D-01 0.164D-01
 Coeff:      0.164D+00 0.959D-01-0.359D+00-0.120D+00 0.352D+00 0.566D+00
 Coeff:     -0.790D+00-0.266D+00 0.291D+00 0.108D+01
 Gap=     0.157 Goal=   None    Shift=    0.000
 Gap=     0.275 Goal=   None    Shift=    0.000
 RMSDP=1.60D-05 MaxDP=2.69D-03 DE=-1.08D-07 OVMax= 5.33D-04

 Cycle  17  Pass 1  IDiag  1:
 RMSU=  7.59D-07    CP:  1.04D+00  1.10D+00  5.30D-01  1.03D+00  3.00D+00
                    CP:  3.00D+00  3.00D+00  3.00D+00  3.00D+00  3.00D+00
                    CP:  3.00D+00  3.00D+00  3.00D+00  3.00D+00  2.82D+00
                    CP:  1.51D+00
 E= -732.300820667540     Delta-E=       -0.000000010341 Rises=F Damp=F
 DIIS: error= 9.60D-07 at cycle  17 NSaved=  17.
 NSaved=17 IEnMin=17 EnMin= -732.300820667540     IErMin=17 ErrMin= 9.60D-07
 ErrMax= 9.60D-07  0.00D+00 EMaxC= 1.00D-01 BMatC= 4.37D-10 BMatP= 1.10D-09
 IDIUse=1 WtCom= 1.00D+00 WtEn= 0.00D+00
 Coeff-Com: -0.617D-04 0.724D-03-0.118D-04-0.342D-02-0.792D-02-0.862D-02
 Coeff-Com:  0.477D-01 0.713D-01-0.848D-01-0.104D+00-0.516D-01 0.246D+00
 Coeff-Com:  0.161D+00-0.285D+00-0.250D+00 0.364D+00 0.904D+00
 Coeff:     -0.617D-04 0.724D-03-0.118D-04-0.342D-02-0.792D-02-0.862D-02
 Coeff:      0.477D-01 0.713D-01-0.848D-01-0.104D+00-0.516D-01 0.246D+00
 Coeff:      0.161D+00-0.285D+00-0.250D+00 0.364D+00 0.904D+00
 Gap=     0.157 Goal=   None    Shift=    0.000
 Gap=     0.275 Goal=   None    Shift=    0.000
 RMSDP=3.69D-06 MaxDP=6.43D-04 DE=-1.03D-08 OVMax= 1.29D-04

 Cycle  18  Pass 1  IDiag  1:
 RMSU=  3.22D-07    CP:  1.04D+00  1.10D+00  5.27D-01  1.04D+00  3.00D+00
                    CP:  3.00D+00  3.00D+00  3.00D+00  3.00D+00  3.00D+00
                    CP:  3.00D+00  3.00D+00  3.00D+00  3.00D+00  2.91D+00
                    CP:  1.63D+00  1.33D+00
 E= -732.300820668999     Delta-E=       -0.000000001460 Rises=F Damp=F
 DIIS: error= 4.50D-07 at cycle  18 NSaved=  18.
 NSaved=18 IEnMin=18 EnMin= -732.300820668999     IErMin=18 ErrMin= 4.50D-07
 ErrMax= 4.50D-07  0.00D+00 EMaxC= 1.00D-01 BMatC= 1.88D-10 BMatP= 4.37D-10
 IDIUse=1 WtCom= 1.00D+00 WtEn= 0.00D+00
 Coeff-Com:  0.276D-04-0.487D-03 0.425D-03 0.419D-02 0.465D-02-0.107D-01
 Coeff-Com: -0.633D-01-0.184D-01 0.144D+00 0.305D-01-0.210D+00-0.172D+00
 Coeff-Com:  0.418D+00 0.295D-01-0.205D+00-0.382D+00 0.297D+00 0.113D+01
 Coeff:      0.276D-04-0.487D-03 0.425D-03 0.419D-02 0.465D-02-0.107D-01
 Coeff:     -0.633D-01-0.184D-01 0.144D+00 0.305D-01-0.210D+00-0.172D+00
 Coeff:      0.418D+00 0.295D-01-0.205D+00-0.382D+00 0.297D+00 0.113D+01
 Gap=     0.157 Goal=   None    Shift=    0.000
 Gap=     0.275 Goal=   None    Shift=    0.000
 RMSDP=1.72D-06 MaxDP=2.85D-04 DE=-1.46D-09 OVMax= 6.56D-05

 Cycle  19  Pass 1  IDiag  1:
 RMSU=  2.53D-07    CP:  1.04D+00  1.10D+00  5.26D-01  1.04D+00  3.00D+00
                    CP:  3.00D+00  3.00D+00  3.00D+00  3.00D+00  3.00D+00
                    CP:  3.00D+00  3.00D+00  3.00D+00  3.00D+00  2.96D+00
                    CP:  1.68D+00  1.68D+00  2.21D+00
 E= -732.300820669768     Delta-E=       -0.000000000769 Rises=F Damp=F
 DIIS: error= 4.48D-07 at cycle  19 NSaved=  19.
 NSaved=19 IEnMin=19 EnMin= -732.300820669768     IErMin=19 ErrMin= 4.48D-07
 ErrMax= 4.48D-07  0.00D+00 EMaxC= 1.00D-01 BMatC= 1.04D-10 BMatP= 1.88D-10
 IDIUse=1 WtCom= 1.00D+00 WtEn= 0.00D+00
 Coeff-Com:  0.146D-04-0.212D-03 0.121D-03 0.148D-02 0.221D-02-0.140D-02
 Coeff-Com: -0.222D-01-0.148D-01 0.466D-01 0.214D-01-0.465D-01-0.743D-01
 Coeff-Com:  0.846D-01 0.462D-01-0.146D-01-0.154D+00-0.613D-01 0.285D+00
 Coeff-Com:  0.902D+00
 Coeff:      0.146D-04-0.212D-03 0.121D-03 0.148D-02 0.221D-02-0.140D-02
 Coeff:     -0.222D-01-0.148D-01 0.466D-01 0.214D-01-0.465D-01-0.743D-01
 Coeff:      0.846D-01 0.462D-01-0.146D-01-0.154D+00-0.613D-01 0.285D+00
 Coeff:      0.902D+00
 Gap=     0.157 Goal=   None    Shift=    0.000
 Gap=     0.275 Goal=   None    Shift=    0.000
 RMSDP=3.83D-07 MaxDP=3.65D-05 DE=-7.69D-10 OVMax= 1.71D-05

 Error on total polarization charges =  0.04334
 SCF Done:  E(UM062X) =  -732.300820670     A.U. after   19 cycles
            NFock= 19  Conv=0.38D-06     -V/T= 2.0641
 <Sx>= 0.0000 <Sy>= 0.0000 <Sz>= 1.5000 <S**2>= 4.7660 S= 1.7396
 <L.S>=  0.00000000000    
 KE= 6.881850750020D+02 PE=-3.340412070220D+03 EE= 1.079297863152D+03
 SMD-CDS (non-electrostatic) energy       (kcal/mol) =       6.76
 (included in total energy above)
 Annihilation of the first spin contaminant:
 S**2 before annihilation     4.7660,   after     3.7741
 Leave Link  502 at Sat May 27 00:56:41 2023, MaxMem=  2684354560 cpu:             888.5 elap:              89.2
 (Enter /home/xut/apps/g16/l701.exe)
 ... and contract with generalized density number  0.
 Compute integral first derivatives.
   1 Symmetry operations used in ECPInt.
 ECPInt:  NShTT=    6105 NPrTT=   23469 LenC2=    5814 LenP2D=   15870.
 LDataN:  DoStor=T MaxTD1= 5 Len=  102
 D1PCM: PCM CHGder 1st derivatives, ID1Alg=3 FixD1E=F DoIter=F DoCFld=F I1PDM=0.
 GePol: Maximum number of non-zero 1st derivatives   =     184
 Leave Link  701 at Sat May 27 00:56:42 2023, MaxMem=  2684354560 cpu:              11.2 elap:               1.1
 (Enter /home/xut/apps/g16/l702.exe)
 L702 exits ... SP integral derivatives will be done elsewhere.
 Leave Link  702 at Sat May 27 00:56:42 2023, MaxMem=  2684354560 cpu:               0.2 elap:               0.0
 (Enter /home/xut/apps/g16/l703.exe)
 Integral derivatives from FoFJK, PRISM(SPDF).
 Compute integral first derivatives, UseDBF=F ICtDFT=           0.
 Calling FoFJK, ICntrl=      2127 FMM=F ISym2X=0 I1Cent= 0 IOpClX= 1 NMat=1 NMatS=1 NMatT=0.
 FoFJK:  IHMeth= 1 ICntrl=    2127 DoSepK=F KAlg= 0 I1Cent=           0 FoldK=F
 IRaf=         0 NMat=       1 IRICut=       1 DoRegI=T DoRafI=F ISym2E= 0 IDoP0=0 IntGTp=1.
 FoFCou: FMM=F IPFlag=           0 FMFlag=      100000 FMFlg1=         800
         NFxFlg=           0 DoJE=F BraDBF=F KetDBF=F FulRan=T
         wScrn=  0.000000 ICntrl=      2127 IOpCl=  1 I1Cent=           0 NGrid=           0
         NMat0=    1 NMatS0=      1 NMatT0=    0 NMatD0=    1 NMtDS0=    0 NMtDT0=    0
 Symmetry not used in FoFCou.
 Leave Link  703 at Sat May 27 00:56:53 2023, MaxMem=  2684354560 cpu:             106.2 elap:              10.7
 (Enter /home/xut/apps/g16/l716.exe)
 Dipole        =-1.15763335D+01 1.55219191D+00-2.95303768D-01
 ***** Axes restored to original set *****
 -------------------------------------------------------------------
 Center     Atomic                   Forces (Hartrees/Bohr)
 Number     Number              X              Y              Z
 -------------------------------------------------------------------
      1        6           0.002536793    0.001391800   -0.000027896
      2        6          -0.000127633   -0.001154531    0.000445243
      3        6          -0.000857605    0.000432653    0.001743542
      4        6           0.002116054   -0.000373331   -0.000430192
      5        6          -0.000215162    0.000858546   -0.001637491
      6        6          -0.001003774   -0.001326850   -0.000116116
      7        1           0.000027770    0.000207687    0.000001521
      8        1           0.000685716    0.000239752   -0.000365821
      9        6          -0.000189943   -0.000059266   -0.004369850
     10        8           0.000002026   -0.000388579    0.000838156
     11        1           0.000146814    0.000763350    0.000594325
     12        8           0.000804430   -0.000026354    0.001513003
     13        8           0.000460399   -0.000727980    0.001962343
     14        1          -0.000885945    0.000557533   -0.000675738
     15        8          -0.001416501    0.000354578    0.000775971
     16        1           0.000617450    0.000151974   -0.000421416
     17        8          -0.000319247   -0.000276342    0.000432051
     18        1          -0.000225447    0.000154242   -0.000303912
     19       24          -0.002156195   -0.000778881    0.000042278
 -------------------------------------------------------------------
 Cartesian Forces:  Max     0.004369850 RMS     0.001065991
 Leave Link  716 at Sat May 27 00:56:53 2023, MaxMem=  2684354560 cpu:               0.2 elap:               0.0
 (Enter /home/xut/apps/g16/l103.exe)

 GradGradGradGradGradGradGradGradGradGradGradGradGradGradGradGradGradGrad
 Berny optimization.
 Using GEDIIS/GDIIS optimizer.
 FormGI is forming the generalized inverse of G from B-inverse, IUseBI=4.
 Internal  Forces:  Max     0.005363561 RMS     0.001242268
 Search for a local minimum.
 Step number   5 out of a maximum of   94
 All quantities printed in internal units (Hartrees-Bohrs-Radians)
 RMS Force = .12423D-02 SwitMx=.10000D-02 MixMth= 1
 Mixed Optimization -- RFO/linear search
 Update second derivatives using D2CorX and points    4    5
 DE= -4.05D-04 DEPred=-5.41D-04 R= 7.50D-01
 TightC=F SS=  1.41D+00  RLast= 2.13D-01 DXNew= 2.3863D+00 6.3771D-01
 Trust test= 7.50D-01 RLast= 2.13D-01 DXMaxT set to 1.42D+00
 ITU=  1  1  1  1  0
 Use linear search instead of GDIIS.
     Eigenvalues ---    0.00212   0.00794   0.01293   0.01375   0.01531
     Eigenvalues ---    0.01587   0.01688   0.01904   0.01972   0.02068
     Eigenvalues ---    0.02098   0.02136   0.02282   0.02298   0.02407
     Eigenvalues ---    0.03037   0.12276   0.15133   0.15689   0.16000
     Eigenvalues ---    0.16099   0.16246   0.16321   0.21948   0.23104
     Eigenvalues ---    0.23443   0.23791   0.24329   0.24997   0.25000
     Eigenvalues ---    0.25201   0.25899   0.28612   0.32792   0.36989
     Eigenvalues ---    0.37266   0.37522   0.41301   0.42267   0.44439
     Eigenvalues ---    0.44714   0.45017   0.45921   0.51309   0.55291
     Eigenvalues ---    0.55464   0.55477   0.55691   0.63731   0.66042
     Eigenvalues ---    0.82079
 RFO step:  Lambda=-8.44934132D-04 EMin= 2.11985464D-03
 Quartic linear search produced a step of -0.15000.
 Iteration  1 RMS(Cart)=  0.06346483 RMS(Int)=  0.00289644
 Iteration  2 RMS(Cart)=  0.00425975 RMS(Int)=  0.00035439
 Iteration  3 RMS(Cart)=  0.00001598 RMS(Int)=  0.00035419
 Iteration  4 RMS(Cart)=  0.00000000 RMS(Int)=  0.00035419
 ITry= 1 IFail=0 DXMaxC= 3.54D-01 DCOld= 1.00D+10 DXMaxT= 1.42D+00 DXLimC= 3.00D+00 Rises=F
 Variable       Old X    -DE/DX   Delta X   Delta X   Delta X     New X
                                 (Linear)    (Quad)   (Total)
    R1        2.63890   0.00123  -0.00081   0.00712   0.00631   2.64521
    R2        2.74250  -0.00146   0.00010  -0.00341  -0.00331   2.73919
    R3        2.46384   0.00016   0.00011  -0.00059  -0.00048   2.46336
    R4        2.59701  -0.00017   0.00092  -0.00635  -0.00542   2.59159
    R5        2.04566  -0.00004   0.00003  -0.00039  -0.00037   2.04529
    R6        2.69983  -0.00036   0.00026  -0.00258  -0.00232   2.69751
    R7        2.85722  -0.00064   0.00096  -0.00851  -0.00754   2.84967
    R8        2.57130  -0.00209  -0.00118   0.00463   0.00345   2.57475
    R9        2.05270   0.00019   0.00001   0.00071   0.00071   2.05341
   R10        2.68885  -0.00036   0.00052  -0.00410  -0.00358   2.68527
   R11        2.56916  -0.00267  -0.00189   0.00797   0.00608   2.57524
   R12        2.44407   0.00007  -0.00027  -0.00013  -0.00040   2.44366
   R13        2.51030  -0.00012  -0.00057   0.00316   0.00258   2.51289
   R14        2.27749  -0.00094  -0.00038   0.00116   0.00078   2.27827
   R15        1.82581   0.00027  -0.00006   0.00089   0.00083   1.82664
   R16        1.83683   0.00005   0.00027  -0.00157  -0.00130   1.83553
   R17        4.02294  -0.00080  -0.00273   0.01402   0.01129   4.03423
   R18        1.84643  -0.00028   0.00041  -0.00301  -0.00260   1.84383
   R19        1.83871   0.00018   0.00012  -0.00032  -0.00020   1.83850
    A1        2.09292  -0.00013   0.00030  -0.00186  -0.00158   2.09134
    A2        2.19661  -0.00033   0.00093  -0.00711  -0.00619   2.19042
    A3        1.99364   0.00045  -0.00124   0.00890   0.00766   2.00130
    A4        2.07817  -0.00017  -0.00006   0.00017   0.00012   2.07828
    A5        2.08629  -0.00015   0.00071  -0.00550  -0.00478   2.08151
    A6        2.11868   0.00032  -0.00065   0.00531   0.00466   2.12333
    A7        2.12882  -0.00016  -0.00023   0.00134   0.00108   2.12989
    A8        2.01481   0.00167  -0.00093   0.01196   0.01099   2.02580
    A9        2.13954  -0.00151   0.00112  -0.01318  -0.01211   2.12744
   A10        2.09414  -0.00027  -0.00002  -0.00100  -0.00101   2.09313
   A11        2.13985   0.00083   0.00150  -0.00657  -0.00507   2.13478
   A12        2.04919  -0.00056  -0.00148   0.00757   0.00609   2.05528
   A13        2.09637   0.00120   0.00045  -0.00021   0.00021   2.09658
   A14        2.12431  -0.00519  -0.00135  -0.00570  -0.00709   2.11722
   A15        2.06197   0.00400   0.00091   0.00635   0.00723   2.06919
   A16        2.07588  -0.00048  -0.00045   0.00149   0.00102   2.07690
   A17        2.14505  -0.00026  -0.00089   0.00443   0.00353   2.14858
   A18        2.06226   0.00075   0.00131  -0.00596  -0.00465   2.05761
   A19        2.08386  -0.00150   0.00152  -0.01561  -0.01578   2.06808
   A20        2.11038   0.00093  -0.00118   0.01237   0.00949   2.11986
   A21        2.08865   0.00062  -0.00030   0.00562   0.00363   2.09227
   A22        2.00459  -0.00128   0.00182  -0.02002  -0.01820   1.98639
   A23        1.99080   0.00176  -0.00033   0.00707   0.00597   1.99677
   A24        2.19786  -0.00536  -0.00091  -0.01233  -0.01402   2.18385
   A25        2.07032   0.00351  -0.00175   0.02448   0.02195   2.09227
   A26        1.97757   0.00113   0.00139  -0.00210  -0.00070   1.97687
   A27        1.96534   0.00038   0.00046   0.00036   0.00082   1.96616
    D1        0.01410  -0.00008  -0.00143   0.00621   0.00479   0.01889
    D2       -3.13815  -0.00007  -0.00123   0.00502   0.00382  -3.13433
    D3       -3.13344   0.00003   0.00164  -0.00835  -0.00668  -3.14012
    D4       -0.00251   0.00004   0.00185  -0.00954  -0.00764  -0.01015
    D5       -0.01058   0.00004  -0.00116   0.00955   0.00839  -0.00220
    D6        3.12786   0.00019   0.00255  -0.00683  -0.00429   3.12357
    D7        3.13630  -0.00005  -0.00387   0.02253   0.01870  -3.12819
    D8       -0.00845   0.00010  -0.00016   0.00616   0.00602  -0.00242
    D9        0.01760  -0.00029  -0.01205   0.05130   0.03925   0.05685
   D10       -3.12965  -0.00019  -0.00914   0.03743   0.02828  -3.10137
   D11       -0.00784  -0.00000   0.00206  -0.01375  -0.01170  -0.01954
   D12        3.12737   0.00007  -0.00039   0.00623   0.00596   3.13333
   D13       -3.13858  -0.00001   0.00184  -0.01247  -0.01065   3.13396
   D14       -0.00336   0.00007  -0.00060   0.00751   0.00700   0.00364
   D15       -0.00238   0.00013   0.00002   0.00502   0.00505   0.00268
   D16        3.14046   0.00006  -0.00017   0.00477   0.00460  -3.13813
   D17       -3.13713   0.00003   0.00267  -0.01648  -0.01371   3.13234
   D18        0.00570  -0.00003   0.00248  -0.01674  -0.01417  -0.00847
   D19       -3.06298   0.00135  -0.00191   0.15590   0.15403  -2.90895
   D20        0.10519  -0.00071  -0.00736   0.05197   0.04459   0.14978
   D21        0.07220   0.00144  -0.00439   0.17607   0.17170   0.24390
   D22       -3.04282  -0.00063  -0.00984   0.07214   0.06227  -2.98056
   D23        0.00595  -0.00016  -0.00270   0.01135   0.00865   0.01461
   D24       -3.09965  -0.00061  -0.00286  -0.00312  -0.00593  -3.10559
   D25       -3.13682  -0.00010  -0.00252   0.01158   0.00908  -3.12774
   D26        0.04076  -0.00055  -0.00268  -0.00289  -0.00550   0.03526
   D27        0.00040   0.00008   0.00324  -0.01832  -0.01508  -0.01468
   D28       -3.13819  -0.00006  -0.00032  -0.00274  -0.00308  -3.14127
   D29        3.10728   0.00033   0.00335  -0.00460  -0.00119   3.10610
   D30       -0.03131   0.00019  -0.00021   0.01097   0.01082  -0.02050
   D31       -2.89596  -0.00018   0.01433  -0.10639  -0.09211  -2.98807
   D32        0.00612  -0.00008   0.00173  -0.00914  -0.00736  -0.00124
   D33        0.28094  -0.00057   0.01418  -0.12046  -0.10634   0.17460
   D34       -3.10017  -0.00047   0.00158  -0.02321  -0.02158  -3.12175
   D35        0.03572  -0.00046  -0.00577   0.00559  -0.00018   0.03554
   D36       -3.10900  -0.00031  -0.00207  -0.01065  -0.01272  -3.12171
   D37        0.02640  -0.00048  -0.00284  -0.03640  -0.03906  -0.01266
   D38       -3.14143   0.00157   0.00254   0.06633   0.06869  -3.07273
         Item               Value     Threshold  Converged?
 Maximum Force            0.005364     0.000450     NO 
 RMS     Force            0.001242     0.000300     NO 
 Maximum Displacement     0.354315     0.001800     NO 
 RMS     Displacement     0.063372     0.001200     NO 
 Predicted change in Energy=-4.999847D-04
 Lowest energy point so far.  Saving SCF results.
 GradGradGradGradGradGradGradGradGradGradGradGradGradGradGradGradGradGrad

 Leave Link  103 at Sat May 27 00:56:53 2023, MaxMem=  2684354560 cpu:               0.2 elap:               0.0
 (Enter /home/xut/apps/g16/l202.exe)
                          Input orientation:                          
 ---------------------------------------------------------------------
 Center     Atomic      Atomic             Coordinates (Angstroms)
 Number     Number       Type             X           Y           Z
 ---------------------------------------------------------------------
      1          6           0       -1.598554    1.684676   -0.010046
      2          6           0       -2.204311    0.422815   -0.022894
      3          6           0       -1.413110   -0.696711    0.014808
      4          6           0        0.011799   -0.616241    0.043199
      5          6           0        0.624172    0.600866    0.036281
      6          6           0       -0.153172    1.790245    0.018808
      7          1           0       -3.284109    0.354596   -0.051305
      8          1           0        0.643091   -1.500264    0.069928
      9          6           0       -2.136424   -2.019889    0.009282
     10          8           0       -1.451557   -3.118488    0.313103
     11          1           0       -0.518185   -2.955975    0.504812
     12          8           0       -3.325334   -2.086259   -0.179345
     13          8           0        1.982456    0.710105    0.020891
     14          1           0        2.313968    1.613576    0.152421
     15          8           0        0.472588    2.921867    0.012447
     16          1           0       -0.125287    3.692924    0.018232
     17          8           0       -2.226910    2.826386   -0.040336
     18          1           0       -3.194073    2.722376   -0.023028
     19         24           0        3.346708   -0.931879    0.007561
 ---------------------------------------------------------------------
                    Distance matrix (angstroms):
                    1          2          3          4          5
     1  C    0.000000
     2  C    1.399786   0.000000
     3  C    2.388726   1.371408   0.000000
     4  C    2.808966   2.448500   1.427462   0.000000
     5  C    2.473317   2.834700   2.415510   1.362497   0.000000
     6  C    1.449519   2.465518   2.787905   2.412257   1.420982
     7  H    2.147536   1.082323   2.147150   3.437218   3.917011
     8  H    3.895537   3.437230   2.208325   1.086619   2.101485
     9  C    3.743458   2.443859   1.507983   2.566367   3.806570
    10  O    4.816265   3.635981   2.440381   2.911271   4.268357
    11  H    4.792485   3.812836   2.478965   2.443016   3.765053
    12  O    4.150949   2.752566   2.371737   3.653346   4.781813
    13  O    3.711385   4.196841   3.675465   2.375538   1.362757
    14  H    3.916538   4.675842   4.387195   3.206867   1.973444
    15  O    2.412628   3.662281   4.080438   3.568119   2.326067
    16  H    2.490858   3.875261   4.574647   4.311417   3.181640
    17  O    1.303553   2.403740   3.616286   4.107368   3.617661
    18  H    1.903332   2.503519   3.855310   4.629078   4.368445
    19  Cr   5.594844   5.714013   4.765630   3.350002   3.124474
                    6          7          8          9         10
     6  C    0.000000
     7  H    3.445108   0.000000
     8  H    3.385867   4.344894   0.000000
     9  C    4.295404   2.637997   2.828320   0.000000
    10  O    5.086066   3.943774   2.658070   1.329763   0.000000
    11  H    4.784980   4.349653   1.912271   1.934039   0.966616
    12  O    5.012899   2.444559   4.019195   1.205608   2.195231
    13  O    2.393244   5.279044   2.584963   4.941475   5.151306
    14  H    2.477063   5.741515   3.534775   5.747047   6.049581
    15  O    1.293130   4.550573   4.425790   5.588193   6.346543
    16  H    1.902883   4.596457   5.249979   6.056482   6.945593
    17  O    2.318938   2.688407   5.193165   4.847373   6.005631
    18  H    3.180833   2.369659   5.706414   4.858882   6.104509
    19  Cr   4.433875   6.754718   2.763421   5.590037   5.281853
                   11         12         13         14         15
    11  H    0.000000
    12  O    3.017377   0.000000
    13  O    4.464026   6.002698   0.000000
    14  H    5.387585   6.752820   0.971319   0.000000
    15  O    5.981060   6.288268   2.677997   2.263161   0.000000
    16  H    6.678247   6.608955   3.652369   3.208061   0.975714
    17  O    6.054141   5.035865   4.711810   4.704001   2.701701
    18  H    6.299417   4.812965   5.554064   5.621275   3.672255
    19  Cr   4.391085   6.773749   2.134823   2.750796   4.807489
                   16         17         18         19
    16  H    0.000000
    17  O    2.274013   0.000000
    18  H    3.218868   0.972894   0.000000
    19  Cr   5.783050   6.722504   7.492418   0.000000
 Stoichiometry    C7H6CrO5(3+,4)
 Framework group  C1[X(C7H6CrO5)]
 Deg. of freedom    51
 Full point group                 C1      NOp   1
 RotChk:  IX=2 Diff= 2.73D-02
 Largest Abelian subgroup         C1      NOp   1
 Largest concise Abelian subgroup C1      NOp   1
                         Standard orientation:                         
 ---------------------------------------------------------------------
 Center     Atomic      Atomic             Coordinates (Angstroms)
 Number     Number       Type             X           Y           Z
 ---------------------------------------------------------------------
      1          6           0        1.645147    1.639923   -0.009782
      2          6           0        2.205706    0.357696    0.022907
      3          6           0        1.374945   -0.733382    0.010892
      4          6           0       -0.046359   -0.602642   -0.010335
      5          6           0       -0.614988    0.635467   -0.022385
      6          6           0        0.204274    1.796463   -0.031813
      7          1           0        3.282560    0.251516    0.046022
      8          1           0       -0.708865   -1.463912   -0.016741
      9          6           0        2.050752   -2.081207    0.036687
     10          8           0        1.325207   -3.160070   -0.242433
     11          1           0        0.396936   -2.967905   -0.431461
     12          8           0        3.237793   -2.186484    0.219289
     13          8           0       -1.968392    0.793380   -0.000779
     14          1           0       -2.268433    1.705533   -0.147112
     15          8           0       -0.380778    2.949624   -0.042746
     16          1           0        0.244095    3.698613   -0.066538
     17          8           0        2.313909    2.758842   -0.004600
     18          1           0        3.276622    2.620077   -0.025844
     19         24           0       -3.390070   -0.798340    0.051450
 ---------------------------------------------------------------------
 Rotational constants (GHZ):           0.7047998           0.4432844           0.2727553
 Leave Link  202 at Sat May 27 00:56:53 2023, MaxMem=  2684354560 cpu:               0.1 elap:               0.0
 (Enter /home/xut/apps/g16/l301.exe)
 Basis read from rwf:  (5D, 7F)
 Pseudo-potential data read from rwf file.
 There are   342 symmetry adapted cartesian basis functions of A   symmetry.
 There are   328 symmetry adapted basis functions of A   symmetry.
   328 basis functions,   538 primitive gaussians,   342 cartesian basis functions
    51 alpha electrons       48 beta electrons
       nuclear repulsion energy       841.1918673251 Hartrees.
 IExCor= 4336 DFT=T Ex+Corr=M062X ExCW=0 ScaHFX=  0.540000
 ScaDFX=  1.000000  1.000000  1.000000  1.000000 ScalE2=  1.000000  1.000000
 IRadAn=      5 IRanWt=     -1 IRanGd=            0 ICorTp=0 IEmpDi=  4
 NAtoms=   19 NActive=   19 NUniq=   19 SFac= 1.00D+00 NAtFMM=   60 NAOKFM=F Big=F
 Integral buffers will be    131072 words long.
 Raffenetti 2 integral format.
 Two-electron integral symmetry is turned on.
 No density basis found on file   724.
 ------------------------------------------------------------------------------
 Polarizable Continuum Model (PCM)
 =================================
 Model                : PCM.
 Atomic radii         : SMD-Coulomb.
 Polarization charges : Total charges.
 Charge compensation  : None.
 Solution method      : On-the-fly selection.
 Cavity type          : VdW (van der Waals Surface) (Alpha=1.000).
 Cavity algorithm     : GePol (No added spheres)
                        Default sphere list used, NSphG=   19.
                        Lebedev-Laikov grids with approx.  5.0 points / Ang**2.
                        Smoothing algorithm: York/Karplus (Gamma=1.0000).
                        Polarization charges: spherical gaussians, with
                                              point-specific exponents (IZeta= 3).
                        Self-potential: point-specific (ISelfS= 7).
                        Self-field    : sphere-specific E.n sum rule (ISelfD= 2).
 1st derivatives      : Analytical E(r).r(x)/FMM algorithm (CHGder, D1EAlg=3).
                        Cavity 1st derivative terms included.
 Solvent              : Water, Eps=  78.355300 Eps(inf)=   1.777849
 ------------------------------------------------------------------------------
 Spheres list:
 ISph  on   Nord     Re0    Alpha      Xe            Ye            Ze
    1   C      1    1.8500  1.000      1.645147      1.639923     -0.009782
    2   C      2    1.8500  1.000      2.205706      0.357696      0.022907
    3   C      3    1.8500  1.000      1.374945     -0.733382      0.010892
    4   C      4    1.8500  1.000     -0.046359     -0.602642     -0.010335
    5   C      5    1.8500  1.000     -0.614988      0.635467     -0.022385
    6   C      6    1.8500  1.000      0.204274      1.796463     -0.031813
    7   H      7    1.2000  1.000      3.282560      0.251516      0.046022
    8   H      8    1.2000  1.000     -0.708865     -1.463912     -0.016741
    9   C      9    1.8500  1.000      2.050752     -2.081207      0.036687
   10   O     10    1.5200  1.000      1.325207     -3.160070     -0.242433
   11   H     11    1.2000  1.000      0.396936     -2.967905     -0.431461
   12   O     12    1.5200  1.000      3.237793     -2.186484      0.219289
   13   O     13    1.5200  1.000     -1.968392      0.793380     -0.000779
   14   H     14    1.2000  1.000     -2.268433      1.705533     -0.147112
   15   O     15    1.5200  1.000     -0.380778      2.949624     -0.042746
   16   H     16    1.2000  1.000      0.244095      3.698613     -0.066538
   17   O     17    1.5200  1.000      2.313909      2.758842     -0.004600
   18   H     18    1.2000  1.000      3.276622      2.620077     -0.025844
   19  Cr     19    1.5115  1.000     -3.390070     -0.798340      0.051450
 ------------------------------------------------------------------------------
 GePol: Number of generator spheres                  =      19
 GePol: Total number of spheres                      =      19
 GePol: Number of exposed spheres                    =      19 (100.00%)
 GePol: Number of points                             =    1467
 GePol: Average weight of points                     =       0.13
 GePol: Minimum weight of points                     =   0.55D-10
 GePol: Maximum weight of points                     =    0.21991
 GePol: Number of points with low weight             =      80
 GePol: Fraction of low-weight points (<1% of avg)   =       5.45%
 GePol: Cavity surface area                          =    187.857 Ang**2
 GePol: Cavity volume                                =    155.071 Ang**3
 ------------------------------------------------------------------------------
 Atomic radii for non-electrostatic terms: SMD-CDS.
 ------------------------------------------------------------------------------
 PCM non-electrostatic energy =         0.0107428723 Hartrees.
 Nuclear repulsion after PCM non-electrostatic terms =      841.2026101975 Hartrees.
 Leave Link  301 at Sat May 27 00:56:53 2023, MaxMem=  2684354560 cpu:               0.7 elap:               0.1
 (Enter /home/xut/apps/g16/l302.exe)
 NPDir=0 NMtPBC=     1 NCelOv=     1 NCel=       1 NClECP=     1 NCelD=      1
         NCelK=      1 NCelE2=     1 NClLst=     1 CellRange=     0.0.
 One-electron integrals computed using PRISM.
 One-electron integral symmetry used in STVInt
   1 Symmetry operations used in ECPInt.
 ECPInt:  NShTT=    6105 NPrTT=   23469 LenC2=    5813 LenP2D=   15876.
 LDataN:  DoStor=T MaxTD1= 4 Len=   56
 NBasis=   328 RedAO= T EigKep=  1.32D-06  NBF=   328
 NBsUse=   327 1.00D-06 EigRej=  6.89D-07 NBFU=   327
 Precomputing XC quadrature grid using
 IXCGrd= 4 IRadAn=           5 IRanWt=          -1 IRanGd=           0 AccXCQ= 0.00D+00.
 Generated NRdTot=       0 NPtTot=           0 NUsed=           0 NTot=          32
 NSgBfM=   342   342   342   342   342 MxSgAt=    19 MxSgA2=    19.
 Leave Link  302 at Sat May 27 00:56:53 2023, MaxMem=  2684354560 cpu:               2.8 elap:               0.3
 (Enter /home/xut/apps/g16/l303.exe)
 DipDrv:  MaxL=1.
 Leave Link  303 at Sat May 27 00:56:53 2023, MaxMem=  2684354560 cpu:               0.4 elap:               0.1
 (Enter /home/xut/apps/g16/l401.exe)
 Initial guess from the checkpoint file:  "149-91-7-meta13-Cr.chk"
 B after Tr=     0.000000    0.000000   -0.000000
         Rot=    0.999970   -0.000388   -0.000035    0.007733 Ang=  -0.89 deg.
 Guess basis will be translated and rotated to current coordinates.
 JPrj=2 DoOrth=T DoCkMO=T.
 Initial guess <Sx>= 0.0000 <Sy>= 0.0000 <Sz>= 1.5000 <S**2>= 4.7660 S= 1.7396
 Generating alternative initial guess.
 ExpMin= 1.90D-02 ExpMax= 8.59D+03 ExpMxC= 1.30D+03 IAcc=3 IRadAn=         5 AccDes= 0.00D+00
 Harris functional with IExCor= 1009 and IRadAn=       5 diagonalized for initial guess.
 HarFok:  IExCor= 1009 AccDes= 0.00D+00 IRadAn=         5 IDoV= 1 UseB2=F ITyADJ=14
 ICtDFT=  3500011 ScaDFX=  1.000000  1.000000  1.000000  1.000000
 FoFCou: FMM=F IPFlag=           0 FMFlag=      100000 FMFlg1=           0
         NFxFlg=           0 DoJE=T BraDBF=F KetDBF=T FulRan=T
         wScrn=  0.000000 ICntrl=       500 IOpCl=  0 I1Cent=   200000004 NGrid=           0
         NMat0=    1 NMatS0=      1 NMatT0=    0 NMatD0=    1 NMtDS0=    0 NMtDT0=    0
 Petite list used in FoFCou.
 Harris En= -732.137308835526    
 Leave Link  401 at Sat May 27 00:56:54 2023, MaxMem=  2684354560 cpu:              10.6 elap:               1.1
 (Enter /home/xut/apps/g16/l502.exe)
 Integral symmetry usage will be decided dynamically.
 UHF open shell SCF:
 Using DIIS extrapolation, IDIIS=  1040.
 NGot=  2684354560 LenX=  2684113999 LenY=  2683996594
 Requested convergence on RMS density matrix=1.00D-06 within 128 cycles.
 Requested convergence on MAX density matrix=1.00D-04.
 Requested convergence on             energy=1.00D-04.
 No special actions if energy rises.
 Fock matrices will be formed incrementally for  20 cycles.

 Cycle   1  Pass 1  IDiag  1:
 FoFJK:  IHMeth= 1 ICntrl=       0 DoSepK=F KAlg= 0 I1Cent=           0 FoldK=F
 IRaf= 910000000 NMat=       1 IRICut=       1 DoRegI=T DoRafI=F ISym2E= 0 IDoP0=0 IntGTp=1.
 FoFCou: FMM=F IPFlag=           0 FMFlag=      100000 FMFlg1=           0
         NFxFlg=           0 DoJE=F BraDBF=F KetDBF=F FulRan=T
         wScrn=  0.000000 ICntrl=         0 IOpCl=  1 I1Cent=           0 NGrid=           0
         NMat0=    1 NMatS0=      1 NMatT0=    0 NMatD0=    1 NMtDS0=    0 NMtDT0=    0
 Symmetry not used in FoFCou.
 Inv3:  Mode=1 IEnd=     6456267.
 Iteration    1 A*A^-1 deviation from unit magnitude is 2.89D-15 for    750.
 Iteration    1 A*A^-1 deviation from orthogonality  is 2.19D-15 for    557    418.
 Iteration    1 A^-1*A deviation from unit magnitude is 2.78D-15 for     64.
 Iteration    1 A^-1*A deviation from orthogonality  is 6.65D-15 for   1135   1117.
 E= -732.284506445069    
 DIIS: error= 4.86D-03 at cycle   1 NSaved=   1.
 NSaved= 1 IEnMin= 1 EnMin= -732.284506445069     IErMin= 1 ErrMin= 4.86D-03
 ErrMax= 4.86D-03  0.00D+00 EMaxC= 1.00D-01 BMatC= 3.87D-02 BMatP= 3.87D-02
 IDIUse=3 WtCom= 9.51D-01 WtEn= 4.86D-02
 Coeff-Com:  0.100D+01
 Coeff-En:   0.100D+01
 Coeff:      0.100D+01
 Gap=     0.462 Goal=   None    Shift=    0.000
 Gap=     0.466 Goal=   None    Shift=    0.000
 GapD=    0.462 DampG=2.000 DampE=1.000 DampFc=2.0000 IDamp=-1.
 RMSDP=1.68D-02 MaxDP=1.15D+00              OVMax= 3.29D-02

 Cycle   2  Pass 1  IDiag  1:
 RMSU=  1.67D-02    CP:  9.92D-01
 E= -732.300066459943     Delta-E=       -0.015560014874 Rises=F Damp=F
 DIIS: error= 1.07D-03 at cycle   2 NSaved=   2.
 NSaved= 2 IEnMin= 2 EnMin= -732.300066459943     IErMin= 2 ErrMin= 1.07D-03
 ErrMax= 1.07D-03  0.00D+00 EMaxC= 1.00D-01 BMatC= 1.32D-03 BMatP= 3.87D-02
 IDIUse=3 WtCom= 9.89D-01 WtEn= 1.07D-02
 Coeff-Com: -0.146D+00 0.115D+01
 Coeff-En:   0.000D+00 0.100D+01
 Coeff:     -0.144D+00 0.114D+01
 Gap=     0.156 Goal=   None    Shift=    0.000
 Gap=     0.276 Goal=   None    Shift=    0.000
 RMSDP=1.58D-03 MaxDP=1.45D-01 DE=-1.56D-02 OVMax= 9.95D-03

 Cycle   3  Pass 1  IDiag  1:
 RMSU=  7.64D-04    CP:  9.90D-01  1.08D+00
 E= -732.300810471207     Delta-E=       -0.000744011264 Rises=F Damp=F
 DIIS: error= 3.23D-04 at cycle   3 NSaved=   3.
 NSaved= 3 IEnMin= 3 EnMin= -732.300810471207     IErMin= 3 ErrMin= 3.23D-04
 ErrMax= 3.23D-04  0.00D+00 EMaxC= 1.00D-01 BMatC= 2.38D-04 BMatP= 1.32D-03
 IDIUse=3 WtCom= 9.97D-01 WtEn= 3.23D-03
 Coeff-Com: -0.576D-01 0.342D+00 0.715D+00
 Coeff-En:   0.000D+00 0.000D+00 0.100D+01
 Coeff:     -0.574D-01 0.341D+00 0.716D+00
 Gap=     0.156 Goal=   None    Shift=    0.000
 Gap=     0.276 Goal=   None    Shift=    0.000
 RMSDP=3.53D-04 MaxDP=6.25D-02 DE=-7.44D-04 OVMax= 2.80D-03

 Cycle   4  Pass 1  IDiag  1:
 RMSU=  2.09D-04    CP:  9.93D-01  1.08D+00  9.76D-01
 E= -732.300860147173     Delta-E=       -0.000049675966 Rises=F Damp=F
 DIIS: error= 2.24D-04 at cycle   4 NSaved=   4.
 NSaved= 4 IEnMin= 4 EnMin= -732.300860147173     IErMin= 4 ErrMin= 2.24D-04
 ErrMax= 2.24D-04  0.00D+00 EMaxC= 1.00D-01 BMatC= 9.40D-05 BMatP= 2.38D-04
 IDIUse=3 WtCom= 9.98D-01 WtEn= 2.24D-03
 Coeff-Com:  0.122D-02-0.647D-01 0.380D+00 0.683D+00
 Coeff-En:   0.000D+00 0.000D+00 0.616D-01 0.938D+00
 Coeff:      0.122D-02-0.645D-01 0.379D+00 0.684D+00
 Gap=     0.156 Goal=   None    Shift=    0.000
 Gap=     0.276 Goal=   None    Shift=    0.000
 RMSDP=2.36D-04 MaxDP=4.39D-02 DE=-4.97D-05 OVMax= 2.08D-03

 Cycle   5  Pass 1  IDiag  1:
 RMSU=  9.50D-05    CP:  9.91D-01  1.08D+00  1.05D+00  5.48D-01
 E= -732.300884849561     Delta-E=       -0.000024702388 Rises=F Damp=F
 DIIS: error= 5.67D-05 at cycle   5 NSaved=   5.
 NSaved= 5 IEnMin= 5 EnMin= -732.300884849561     IErMin= 5 ErrMin= 5.67D-05
 ErrMax= 5.67D-05  0.00D+00 EMaxC= 1.00D-01 BMatC= 3.70D-06 BMatP= 9.40D-05
 IDIUse=1 WtCom= 1.00D+00 WtEn= 0.00D+00
 Coeff-Com:  0.434D-02-0.429D-01 0.478D-01 0.171D+00 0.820D+00
 Coeff:      0.434D-02-0.429D-01 0.478D-01 0.171D+00 0.820D+00
 Gap=     0.156 Goal=   None    Shift=    0.000
 Gap=     0.276 Goal=   None    Shift=    0.000
 RMSDP=5.02D-05 MaxDP=4.56D-03 DE=-2.47D-05 OVMax= 1.11D-03

 Cycle   6  Pass 1  IDiag  1:
 RMSU=  3.25D-05    CP:  9.91D-01  1.08D+00  1.04D+00  5.77D-01  1.34D+00
 E= -732.300887627244     Delta-E=       -0.000002777683 Rises=F Damp=F
 DIIS: error= 4.12D-05 at cycle   6 NSaved=   6.
 NSaved= 6 IEnMin= 6 EnMin= -732.300887627244     IErMin= 6 ErrMin= 4.12D-05
 ErrMax= 4.12D-05  0.00D+00 EMaxC= 1.00D-01 BMatC= 1.53D-06 BMatP= 3.70D-06
 IDIUse=1 WtCom= 1.00D+00 WtEn= 0.00D+00
 Coeff-Com:  0.146D-02-0.645D-02-0.444D-01-0.452D-01 0.364D+00 0.730D+00
 Coeff:      0.146D-02-0.645D-02-0.444D-01-0.452D-01 0.364D+00 0.730D+00
 Gap=     0.156 Goal=   None    Shift=    0.000
 Gap=     0.276 Goal=   None    Shift=    0.000
 RMSDP=4.01D-05 MaxDP=7.01D-03 DE=-2.78D-06 OVMax= 9.98D-04

 Cycle   7  Pass 1  IDiag  1:
 RMSU=  1.71D-05    CP:  9.90D-01  1.08D+00  1.03D+00  5.57D-01  1.61D+00
                    CP:  1.49D+00
 E= -732.300889164321     Delta-E=       -0.000001537077 Rises=F Damp=F
 DIIS: error= 2.92D-05 at cycle   7 NSaved=   7.
 NSaved= 7 IEnMin= 7 EnMin= -732.300889164321     IErMin= 7 ErrMin= 2.92D-05
 ErrMax= 2.92D-05  0.00D+00 EMaxC= 1.00D-01 BMatC= 6.03D-07 BMatP= 1.53D-06
 IDIUse=1 WtCom= 1.00D+00 WtEn= 0.00D+00
 Coeff-Com: -0.698D-03 0.984D-02-0.262D-01-0.632D-01-0.110D+00 0.268D+00
 Coeff-Com:  0.922D+00
 Coeff:     -0.698D-03 0.984D-02-0.262D-01-0.632D-01-0.110D+00 0.268D+00
 Coeff:      0.922D+00
 Gap=     0.156 Goal=   None    Shift=    0.000
 Gap=     0.276 Goal=   None    Shift=    0.000
 RMSDP=5.21D-05 MaxDP=9.90D-03 DE=-1.54D-06 OVMax= 1.28D-03

 Cycle   8  Pass 1  IDiag  1:
 RMSU=  1.34D-05    CP:  9.90D-01  1.08D+00  1.01D+00  5.30D-01  1.91D+00
                    CP:  2.17D+00  2.20D+00
 E= -732.300890506493     Delta-E=       -0.000001342171 Rises=F Damp=F
 DIIS: error= 2.77D-05 at cycle   8 NSaved=   8.
 NSaved= 8 IEnMin= 8 EnMin= -732.300890506493     IErMin= 8 ErrMin= 2.77D-05
 ErrMax= 2.77D-05  0.00D+00 EMaxC= 1.00D-01 BMatC= 3.85D-07 BMatP= 6.03D-07
 IDIUse=1 WtCom= 1.00D+00 WtEn= 0.00D+00
 Coeff-Com: -0.675D-03 0.579D-02 0.211D-02-0.161D-01-0.135D+00-0.496D-01
 Coeff-Com:  0.286D+00 0.908D+00
 Coeff:     -0.675D-03 0.579D-02 0.211D-02-0.161D-01-0.135D+00-0.496D-01
 Coeff:      0.286D+00 0.908D+00
 Gap=     0.156 Goal=   None    Shift=    0.000
 Gap=     0.276 Goal=   None    Shift=    0.000
 RMSDP=4.49D-05 MaxDP=8.04D-03 DE=-1.34D-06 OVMax= 1.24D-03

 Cycle   9  Pass 1  IDiag  1:
 RMSU=  8.80D-06    CP:  9.90D-01  1.08D+00  9.93D-01  5.16D-01  2.14D+00
                    CP:  2.79D+00  3.00D+00  1.85D+00
 E= -732.300891615980     Delta-E=       -0.000001109488 Rises=F Damp=F
 DIIS: error= 2.64D-05 at cycle   9 NSaved=   9.
 NSaved= 9 IEnMin= 9 EnMin= -732.300891615980     IErMin= 9 ErrMin= 2.64D-05
 ErrMax= 2.64D-05  0.00D+00 EMaxC= 1.00D-01 BMatC= 3.17D-07 BMatP= 3.85D-07
 IDIUse=1 WtCom= 1.00D+00 WtEn= 0.00D+00
 Coeff-Com:  0.598D-03-0.805D-02 0.208D-01 0.442D-01 0.873D-01-0.140D+00
 Coeff-Com: -0.732D+00-0.178D+00 0.190D+01
 Coeff:      0.598D-03-0.805D-02 0.208D-01 0.442D-01 0.873D-01-0.140D+00
 Coeff:     -0.732D+00-0.178D+00 0.190D+01
 Gap=     0.156 Goal=   None    Shift=    0.000
 Gap=     0.276 Goal=   None    Shift=    0.000
 RMSDP=1.00D-04 MaxDP=1.81D-02 DE=-1.11D-06 OVMax= 2.75D-03

 Cycle  10  Pass 1  IDiag  1:
 RMSU=  5.12D-05    CP:  9.90D-01  1.08D+00  9.54D-01  4.79D-01  2.61D+00
                    CP:  3.00D+00  3.00D+00  3.00D+00  3.00D+00
 E= -732.300893778893     Delta-E=       -0.000002162913 Rises=F Damp=F
 DIIS: error= 2.35D-05 at cycle  10 NSaved=  10.
 NSaved=10 IEnMin=10 EnMin= -732.300893778893     IErMin=10 ErrMin= 2.35D-05
 ErrMax= 2.35D-05  0.00D+00 EMaxC= 1.00D-01 BMatC= 2.55D-07 BMatP= 3.17D-07
 IDIUse=1 WtCom= 1.00D+00 WtEn= 0.00D+00
 Coeff-Com:  0.114D-02-0.110D-01 0.552D-02 0.369D-01 0.200D+00 0.393D-01
 Coeff-Com: -0.622D+00-0.139D+01 0.759D+00 0.198D+01
 Coeff:      0.114D-02-0.110D-01 0.552D-02 0.369D-01 0.200D+00 0.393D-01
 Coeff:     -0.622D+00-0.139D+01 0.759D+00 0.198D+01
 Gap=     0.156 Goal=   None    Shift=    0.000
 Gap=     0.276 Goal=   None    Shift=    0.000
 RMSDP=2.00D-04 MaxDP=3.54D-02 DE=-2.16D-06 OVMax= 5.49D-03

 Cycle  11  Pass 1  IDiag  1:
 RMSU=  6.97D-05    CP:  9.89D-01  1.08D+00  8.73D-01  4.17D-01  3.00D+00
                    CP:  3.00D+00  3.00D+00  3.00D+00  3.00D+00  3.00D+00
 E= -732.300897176948     Delta-E=       -0.000003398054 Rises=F Damp=F
 DIIS: error= 1.79D-05 at cycle  11 NSaved=  11.
 NSaved=11 IEnMin=11 EnMin= -732.300897176948     IErMin=11 ErrMin= 1.79D-05
 ErrMax= 1.79D-05  0.00D+00 EMaxC= 1.00D-01 BMatC= 1.54D-07 BMatP= 2.55D-07
 IDIUse=1 WtCom= 1.00D+00 WtEn= 0.00D+00
 Coeff-Com: -0.236D-03 0.461D-02-0.186D-01-0.309D-01-0.321D-01 0.121D+00
 Coeff-Com:  0.558D+00-0.207D+00-0.172D+01 0.671D+00 0.166D+01
 Coeff:     -0.236D-03 0.461D-02-0.186D-01-0.309D-01-0.321D-01 0.121D+00
 Coeff:      0.558D+00-0.207D+00-0.172D+01 0.671D+00 0.166D+01
 Gap=     0.156 Goal=   None    Shift=    0.000
 Gap=     0.276 Goal=   None    Shift=    0.000
 RMSDP=2.37D-04 MaxDP=4.15D-02 DE=-3.40D-06 OVMax= 6.52D-03

 Cycle  12  Pass 1  IDiag  1:
 RMSU=  9.65D-05    CP:  9.88D-01  1.07D+00  7.76D-01  3.47D-01  3.00D+00
                    CP:  3.00D+00  3.00D+00  3.00D+00  3.00D+00  3.00D+00
                    CP:  3.00D+00
 E= -732.300899822629     Delta-E=       -0.000002645681 Rises=F Damp=F
 DIIS: error= 1.37D-05 at cycle  12 NSaved=  12.
 NSaved=12 IEnMin=12 EnMin= -732.300899822629     IErMin=12 ErrMin= 1.37D-05
 ErrMax= 1.37D-05  0.00D+00 EMaxC= 1.00D-01 BMatC= 8.66D-08 BMatP= 1.54D-07
 IDIUse=1 WtCom= 1.00D+00 WtEn= 0.00D+00
 Coeff-Com: -0.517D-03 0.598D-02-0.990D-02-0.233D-01-0.827D-01 0.578D-02
 Coeff-Com:  0.464D+00 0.533D+00-0.108D+01-0.380D+00 0.523D+00 0.104D+01
 Coeff:     -0.517D-03 0.598D-02-0.990D-02-0.233D-01-0.827D-01 0.578D-02
 Coeff:      0.464D+00 0.533D+00-0.108D+01-0.380D+00 0.523D+00 0.104D+01
 Gap=     0.156 Goal=   None    Shift=    0.000
 Gap=     0.276 Goal=   None    Shift=    0.000
 RMSDP=1.05D-04 MaxDP=1.82D-02 DE=-2.65D-06 OVMax= 2.88D-03

 Cycle  13  Pass 1  IDiag  1:
 RMSU=  5.68D-05    CP:  9.87D-01  1.07D+00  7.33D-01  3.19D-01  3.00D+00
                    CP:  3.00D+00  3.00D+00  3.00D+00  3.00D+00  3.00D+00
                    CP:  3.00D+00  1.67D+00
 E= -732.300900623529     Delta-E=       -0.000000800900 Rises=F Damp=F
 DIIS: error= 1.57D-05 at cycle  13 NSaved=  13.
 NSaved=13 IEnMin=13 EnMin= -732.300900623529     IErMin=12 ErrMin= 1.37D-05
 ErrMax= 1.57D-05  0.00D+00 EMaxC= 1.00D-01 BMatC= 5.80D-08 BMatP= 8.66D-08
 IDIUse=1 WtCom= 1.00D+00 WtEn= 0.00D+00
 Coeff-Com:  0.192D-03-0.364D-02 0.121D-01 0.284D-01 0.392D-01-0.143D+00
 Coeff-Com: -0.412D+00 0.272D+00 0.105D+01-0.221D+00-0.146D+01-0.707D-01
 Coeff-Com:  0.191D+01
 Coeff:      0.192D-03-0.364D-02 0.121D-01 0.284D-01 0.392D-01-0.143D+00
 Coeff:     -0.412D+00 0.272D+00 0.105D+01-0.221D+00-0.146D+01-0.707D-01
 Coeff:      0.191D+01
 Gap=     0.156 Goal=   None    Shift=    0.000
 Gap=     0.276 Goal=   None    Shift=    0.000
 RMSDP=1.26D-04 MaxDP=2.26D-02 DE=-8.01D-07 OVMax= 3.42D-03

 Cycle  14  Pass 1  IDiag  1:
 RMSU=  5.56D-06    CP:  9.87D-01  1.07D+00  6.83D-01  2.78D-01  3.00D+00
                    CP:  3.00D+00  3.00D+00  3.00D+00  3.00D+00  3.00D+00
                    CP:  3.00D+00  2.47D+00  2.21D+00
 E= -732.300901370364     Delta-E=       -0.000000746835 Rises=F Damp=F
 DIIS: error= 1.20D-05 at cycle  14 NSaved=  14.
 NSaved=14 IEnMin=14 EnMin= -732.300901370364     IErMin=14 ErrMin= 1.20D-05
 ErrMax= 1.20D-05  0.00D+00 EMaxC= 1.00D-01 BMatC= 3.51D-08 BMatP= 5.80D-08
 IDIUse=1 WtCom= 1.00D+00 WtEn= 0.00D+00
 Coeff-Com:  0.392D-03-0.489D-02 0.847D-02 0.249D-01 0.687D-01-0.758D-01
 Coeff-Com: -0.370D+00-0.227D+00 0.802D+00 0.439D+00-0.830D+00-0.803D+00
 Coeff-Com:  0.586D+00 0.138D+01
 Coeff:      0.392D-03-0.489D-02 0.847D-02 0.249D-01 0.687D-01-0.758D-01
 Coeff:     -0.370D+00-0.227D+00 0.802D+00 0.439D+00-0.830D+00-0.803D+00
 Coeff:      0.586D+00 0.138D+01
 Gap=     0.156 Goal=   None    Shift=    0.000
 Gap=     0.276 Goal=   None    Shift=    0.000
 RMSDP=7.61D-05 MaxDP=1.42D-02 DE=-7.47D-07 OVMax= 1.99D-03

 Cycle  15  Pass 1  IDiag  1:
 RMSU=  1.93D-06    CP:  9.86D-01  1.07D+00  6.54D-01  2.48D-01  3.00D+00
                    CP:  3.00D+00  3.00D+00  3.00D+00  3.00D+00  3.00D+00
                    CP:  3.00D+00  2.93D+00  2.94D+00  2.30D+00
 E= -732.300901713564     Delta-E=       -0.000000343200 Rises=F Damp=F
 DIIS: error= 7.99D-06 at cycle  15 NSaved=  15.
 NSaved=15 IEnMin=15 EnMin= -732.300901713564     IErMin=15 ErrMin= 7.99D-06
 ErrMax= 7.99D-06  0.00D+00 EMaxC= 1.00D-01 BMatC= 1.39D-08 BMatP= 3.51D-08
 IDIUse=1 WtCom= 1.00D+00 WtEn= 0.00D+00
 Coeff-Com:  0.644D-04-0.752D-04-0.365D-02-0.407D-02 0.116D-01 0.276D-01
 Coeff-Com:  0.941D-01-0.236D+00-0.384D+00 0.446D+00 0.437D+00-0.331D+00
 Coeff-Com: -0.801D+00 0.582D+00 0.116D+01
 Coeff:      0.644D-04-0.752D-04-0.365D-02-0.407D-02 0.116D-01 0.276D-01
 Coeff:      0.941D-01-0.236D+00-0.384D+00 0.446D+00 0.437D+00-0.331D+00
 Coeff:     -0.801D+00 0.582D+00 0.116D+01
 Gap=     0.156 Goal=   None    Shift=    0.000
 Gap=     0.276 Goal=   None    Shift=    0.000
 RMSDP=6.70D-05 MaxDP=1.24D-02 DE=-3.43D-07 OVMax= 1.78D-03

 Cycle  16  Pass 1  IDiag  1:
 RMSU=  4.67D-05    CP:  9.86D-01  1.07D+00  6.28D-01  2.24D-01  3.00D+00
                    CP:  3.00D+00  3.00D+00  3.00D+00  3.00D+00  3.00D+00
                    CP:  3.00D+00  3.00D+00  3.00D+00  3.00D+00  2.46D+00
 E= -732.300901868750     Delta-E=       -0.000000155186 Rises=F Damp=F
 DIIS: error= 3.38D-06 at cycle  16 NSaved=  16.
 NSaved=16 IEnMin=16 EnMin= -732.300901868750     IErMin=16 ErrMin= 3.38D-06
 ErrMax= 3.38D-06  0.00D+00 EMaxC= 1.00D-01 BMatC= 5.42D-09 BMatP= 1.39D-08
 IDIUse=1 WtCom= 1.00D+00 WtEn= 0.00D+00
 Coeff-Com: -0.148D-03 0.198D-02-0.405D-02-0.103D-01-0.258D-01 0.281D-01
 Coeff-Com:  0.180D+00 0.803D-01-0.447D+00-0.467D-01 0.363D+00 0.297D+00
 Coeff-Com: -0.356D+00-0.611D+00 0.334D+00 0.122D+01
 Coeff:     -0.148D-03 0.198D-02-0.405D-02-0.103D-01-0.258D-01 0.281D-01
 Coeff:      0.180D+00 0.803D-01-0.447D+00-0.467D-01 0.363D+00 0.297D+00
 Coeff:     -0.356D+00-0.611D+00 0.334D+00 0.122D+01
 Gap=     0.156 Goal=   None    Shift=    0.000
 Gap=     0.276 Goal=   None    Shift=    0.000
 RMSDP=2.85D-05 MaxDP=5.63D-03 DE=-1.55D-07 OVMax= 7.24D-04

 Cycle  17  Pass 1  IDiag  1:
 RMSU=  3.78D-06    CP:  9.86D-01  1.07D+00  6.18D-01  2.11D-01  3.00D+00
                    CP:  3.00D+00  3.00D+00  3.00D+00  3.00D+00  3.00D+00
                    CP:  3.00D+00  3.00D+00  3.00D+00  3.00D+00  3.00D+00
                    CP:  1.47D+00
 E= -732.300901904819     Delta-E=       -0.000000036069 Rises=F Damp=F
 DIIS: error= 1.27D-06 at cycle  17 NSaved=  17.
 NSaved=17 IEnMin=17 EnMin= -732.300901904819     IErMin=17 ErrMin= 1.27D-06
 ErrMax= 1.27D-06  0.00D+00 EMaxC= 1.00D-01 BMatC= 1.25D-09 BMatP= 5.42D-09
 IDIUse=1 WtCom= 1.00D+00 WtEn= 0.00D+00
 Coeff-Com: -0.385D-04 0.347D-03 0.805D-04-0.863D-03-0.690D-02-0.295D-02
 Coeff-Com:  0.678D-02 0.854D-01 0.206D-02-0.107D+00-0.616D-01 0.154D+00
 Coeff-Com:  0.134D+00-0.285D+00-0.197D+00 0.195D+00 0.108D+01
 Coeff:     -0.385D-04 0.347D-03 0.805D-04-0.863D-03-0.690D-02-0.295D-02
 Coeff:      0.678D-02 0.854D-01 0.206D-02-0.107D+00-0.616D-01 0.154D+00
 Coeff:      0.134D+00-0.285D+00-0.197D+00 0.195D+00 0.108D+01
 Gap=     0.156 Goal=   None    Shift=    0.000
 Gap=     0.276 Goal=   None    Shift=    0.000
 RMSDP=7.91D-06 MaxDP=1.61D-03 DE=-3.61D-08 OVMax= 1.91D-04

 Cycle  18  Pass 1  IDiag  1:
 RMSU=  8.59D-07    CP:  9.86D-01  1.07D+00  6.16D-01  2.07D-01  3.00D+00
                    CP:  3.00D+00  3.00D+00  3.00D+00  3.00D+00  3.00D+00
                    CP:  3.00D+00  3.00D+00  3.00D+00  3.00D+00  3.00D+00
                    CP:  1.60D+00  1.53D+00
 E= -732.300901910381     Delta-E=       -0.000000005562 Rises=F Damp=F
 DIIS: error= 1.17D-06 at cycle  18 NSaved=  18.
 NSaved=18 IEnMin=18 EnMin= -732.300901910381     IErMin=18 ErrMin= 1.17D-06
 ErrMax= 1.17D-06  0.00D+00 EMaxC= 1.00D-01 BMatC= 6.37D-10 BMatP= 1.25D-09
 IDIUse=1 WtCom= 1.00D+00 WtEn= 0.00D+00
 Coeff-Com:  0.188D-04-0.347D-03 0.108D-02 0.224D-02 0.383D-02-0.899D-02
 Coeff-Com: -0.442D-01 0.176D-01 0.113D+00-0.287D-01-0.133D+00-0.554D-02
 Coeff-Com:  0.163D+00 0.455D-01-0.177D+00-0.266D+00 0.459D+00 0.858D+00
 Coeff:      0.188D-04-0.347D-03 0.108D-02 0.224D-02 0.383D-02-0.899D-02
 Coeff:     -0.442D-01 0.176D-01 0.113D+00-0.287D-01-0.133D+00-0.554D-02
 Coeff:      0.163D+00 0.455D-01-0.177D+00-0.266D+00 0.459D+00 0.858D+00
 Gap=     0.156 Goal=   None    Shift=    0.000
 Gap=     0.276 Goal=   None    Shift=    0.000
 RMSDP=2.46D-06 MaxDP=4.98D-04 DE=-5.56D-09 OVMax= 5.84D-05

 Cycle  19  Pass 1  IDiag  1:
 RMSU=  3.99D-07    CP:  9.86D-01  1.07D+00  6.15D-01  2.06D-01  3.00D+00
                    CP:  3.00D+00  3.00D+00  3.00D+00  3.00D+00  3.00D+00
                    CP:  3.00D+00  3.00D+00  3.00D+00  3.00D+00  3.00D+00
                    CP:  1.64D+00  1.72D+00  1.69D+00
 E= -732.300901912145     Delta-E=       -0.000000001765 Rises=F Damp=F
 DIIS: error= 1.11D-06 at cycle  19 NSaved=  19.
 NSaved=19 IEnMin=19 EnMin= -732.300901912145     IErMin=19 ErrMin= 1.11D-06
 ErrMax= 1.11D-06  0.00D+00 EMaxC= 1.00D-01 BMatC= 3.99D-10 BMatP= 6.37D-10
 IDIUse=1 WtCom= 1.00D+00 WtEn= 0.00D+00
 Coeff-Com:  0.499D-05-0.533D-04 0.739D-04 0.221D-03 0.109D-02-0.277D-04
 Coeff-Com: -0.348D-02-0.923D-02 0.732D-02 0.120D-01-0.186D-02-0.155D-01
 Coeff-Com: -0.112D-01 0.354D-01 0.106D-01-0.376D-01-0.140D+00 0.392D-01
 Coeff-Com:  0.111D+01
 Coeff:      0.499D-05-0.533D-04 0.739D-04 0.221D-03 0.109D-02-0.277D-04
 Coeff:     -0.348D-02-0.923D-02 0.732D-02 0.120D-01-0.186D-02-0.155D-01
 Coeff:     -0.112D-01 0.354D-01 0.106D-01-0.376D-01-0.140D+00 0.392D-01
 Coeff:      0.111D+01
 Gap=     0.156 Goal=   None    Shift=    0.000
 Gap=     0.276 Goal=   None    Shift=    0.000
 RMSDP=1.03D-06 MaxDP=1.52D-04 DE=-1.76D-09 OVMax= 4.31D-05

 Cycle  20  Pass 1  IDiag  1:
 RMSU=  3.93D-07    CP:  9.86D-01  1.07D+00  6.15D-01  2.05D-01  3.00D+00
                    CP:  3.00D+00  3.00D+00  3.00D+00  3.00D+00  3.00D+00
                    CP:  3.00D+00  3.00D+00  3.00D+00  3.00D+00  3.00D+00
                    CP:  1.65D+00  1.89D+00  2.05D+00  1.99D+00
 E= -732.300901913545     Delta-E=       -0.000000001399 Rises=F Damp=F
 DIIS: error= 1.06D-06 at cycle  20 NSaved=  20.
 NSaved=20 IEnMin=20 EnMin= -732.300901913545     IErMin=20 ErrMin= 1.06D-06
 ErrMax= 1.06D-06  0.00D+00 EMaxC= 1.00D-01 BMatC= 3.60D-10 BMatP= 3.99D-10
 IDIUse=1 WtCom= 1.00D+00 WtEn= 0.00D+00
 Coeff-Com: -0.118D-04 0.189D-03-0.503D-03-0.112D-02-0.226D-02 0.425D-02
 Coeff-Com:  0.212D-01-0.455D-02-0.541D-01 0.888D-02 0.576D-01 0.115D-01
 Coeff-Com: -0.681D-01-0.306D-01 0.738D-01 0.140D+00-0.203D+00-0.422D+00
 Coeff-Com:  0.135D+00 0.133D+01
 Coeff:     -0.118D-04 0.189D-03-0.503D-03-0.112D-02-0.226D-02 0.425D-02
 Coeff:      0.212D-01-0.455D-02-0.541D-01 0.888D-02 0.576D-01 0.115D-01
 Coeff:     -0.681D-01-0.306D-01 0.738D-01 0.140D+00-0.203D+00-0.422D+00
 Coeff:      0.135D+00 0.133D+01
 Gap=     0.156 Goal=   None    Shift=    0.000
 Gap=     0.276 Goal=   None    Shift=    0.000
 RMSDP=1.04D-06 MaxDP=1.02D-04 DE=-1.40D-09 OVMax= 5.35D-05

 Cycle  21  Pass 1  IDiag  1:
 Restarting incremental Fock formation.
 E= -732.300901915242     Delta-E=       -0.000000001697 Rises=F Damp=F
 DIIS: error= 1.00D-06 at cycle  21 NSaved=  20.
 NSaved=20 IEnMin=20 EnMin= -732.300901915242     IErMin=20 ErrMin= 1.00D-06
 ErrMax= 1.00D-06  0.00D+00 EMaxC= 1.00D-01 BMatC= 3.19D-10 BMatP= 3.60D-10
 IDIUse=1 WtCom= 1.00D+00 WtEn= 0.00D+00
 Coeff-Com:  0.457D-04-0.133D-03-0.393D-03-0.188D-02 0.875D-03 0.489D-02
 Coeff-Com:  0.204D-01-0.860D-02-0.329D-01 0.694D-02 0.401D-01 0.184D-01
 Coeff-Com: -0.964D-01-0.274D-01 0.132D+00 0.261D+00-0.288D+00-0.243D+01
 Coeff-Com:  0.783D+00 0.262D+01
 Coeff:      0.457D-04-0.133D-03-0.393D-03-0.188D-02 0.875D-03 0.489D-02
 Coeff:      0.204D-01-0.860D-02-0.329D-01 0.694D-02 0.401D-01 0.184D-01
 Coeff:     -0.964D-01-0.274D-01 0.132D+00 0.261D+00-0.288D+00-0.243D+01
 Coeff:      0.783D+00 0.262D+01
 Gap=     0.156 Goal=   None    Shift=    0.000
 Gap=     0.276 Goal=   None    Shift=    0.000
 RMSDP=3.88D-06 MaxDP=3.62D-04 DE=-1.70D-09 OVMax= 1.89D-04

 Cycle  22  Pass 1  IDiag  1:
 RMSU=  3.87D-06    CP:  1.00D+00
 E= -732.300901920438     Delta-E=       -0.000000005197 Rises=F Damp=F
 DIIS: error= 7.86D-07 at cycle  22 NSaved=  20.
 NSaved=20 IEnMin=20 EnMin= -732.300901920438     IErMin=20 ErrMin= 7.86D-07
 ErrMax= 7.86D-07  0.00D+00 EMaxC= 1.00D-01 BMatC= 2.12D-10 BMatP= 3.19D-10
 IDIUse=1 WtCom= 1.00D+00 WtEn= 0.00D+00
 Coeff-Com:  0.165D-03 0.240D-03-0.371D-03-0.278D-02-0.675D-02 0.142D-01
 Coeff-Com:  0.293D-01-0.265D-01-0.328D-01 0.549D-02 0.617D-01-0.871D-02
 Coeff-Com: -0.753D-01-0.819D-01 0.246D+00 0.349D+00-0.221D+00-0.150D+01
 Coeff-Com:  0.228D+00 0.202D+01
 Coeff:      0.165D-03 0.240D-03-0.371D-03-0.278D-02-0.675D-02 0.142D-01
 Coeff:      0.293D-01-0.265D-01-0.328D-01 0.549D-02 0.617D-01-0.871D-02
 Coeff:     -0.753D-01-0.819D-01 0.246D+00 0.349D+00-0.221D+00-0.150D+01
 Coeff:      0.228D+00 0.202D+01
 Gap=     0.156 Goal=   None    Shift=    0.000
 Gap=     0.276 Goal=   None    Shift=    0.000
 RMSDP=5.03D-06 MaxDP=4.73D-04 DE=-5.20D-09 OVMax= 2.46D-04

 Cycle  23  Pass 1  IDiag  1:
 RMSU=  3.96D-07    CP:  1.00D+00  2.29D+00
 E= -732.300901925378     Delta-E=       -0.000000004939 Rises=F Damp=F
 DIIS: error= 4.99D-07 at cycle  23 NSaved=  20.
 NSaved=20 IEnMin=20 EnMin= -732.300901925378     IErMin=20 ErrMin= 4.99D-07
 ErrMax= 4.99D-07  0.00D+00 EMaxC= 1.00D-01 BMatC= 1.20D-10 BMatP= 2.12D-10
 IDIUse=1 WtCom= 1.00D+00 WtEn= 0.00D+00
 Coeff-Com:  0.119D-03 0.998D-03-0.927D-03-0.292D-02-0.891D-02 0.132D-01
 Coeff-Com:  0.562D-02-0.743D-02-0.220D-01 0.157D-01 0.509D-01-0.190D-01
 Coeff-Com: -0.120D+00-0.609D-01 0.344D+00 0.166D+01-0.143D+01-0.166D+01
 Coeff-Com:  0.922D+00 0.132D+01
 Coeff:      0.119D-03 0.998D-03-0.927D-03-0.292D-02-0.891D-02 0.132D-01
 Coeff:      0.562D-02-0.743D-02-0.220D-01 0.157D-01 0.509D-01-0.190D-01
 Coeff:     -0.120D+00-0.609D-01 0.344D+00 0.166D+01-0.143D+01-0.166D+01
 Coeff:      0.922D+00 0.132D+01
 Gap=     0.156 Goal=   None    Shift=    0.000
 Gap=     0.276 Goal=   None    Shift=    0.000
 RMSDP=4.66D-06 MaxDP=4.36D-04 DE=-4.94D-09 OVMax= 2.26D-04

 Cycle  24  Pass 1  IDiag  1:
 RMSU=  1.90D-06    CP:  1.00D+00  3.00D+00  2.18D+00
 E= -732.300901928129     Delta-E=       -0.000000002751 Rises=F Damp=F
 DIIS: error= 2.36D-07 at cycle  24 NSaved=  20.
 NSaved=20 IEnMin=20 EnMin= -732.300901928129     IErMin=20 ErrMin= 2.36D-07
 ErrMax= 2.36D-07  0.00D+00 EMaxC= 1.00D-01 BMatC= 5.02D-11 BMatP= 1.20D-10
 IDIUse=1 WtCom= 1.00D+00 WtEn= 0.00D+00
 Coeff-Com: -0.605D-04 0.912D-03 0.221D-02-0.563D-02-0.724D-02 0.736D-02
 Coeff-Com:  0.131D-01-0.589D-02-0.233D-01 0.403D-02 0.338D-01 0.408D-01
 Coeff-Com: -0.151D+00-0.167D+00 0.476D+00 0.739D+00-0.379D+00-0.151D+01
 Coeff-Com:  0.456D+00 0.148D+01
 Coeff:     -0.605D-04 0.912D-03 0.221D-02-0.563D-02-0.724D-02 0.736D-02
 Coeff:      0.131D-01-0.589D-02-0.233D-01 0.403D-02 0.338D-01 0.408D-01
 Coeff:     -0.151D+00-0.167D+00 0.476D+00 0.739D+00-0.379D+00-0.151D+01
 Coeff:      0.456D+00 0.148D+01
 Gap=     0.156 Goal=   None    Shift=    0.000
 Gap=     0.276 Goal=   None    Shift=    0.000
 RMSDP=3.78D-06 MaxDP=3.47D-04 DE=-2.75D-09 OVMax= 1.80D-04

 Cycle  25  Pass 1  IDiag  1:
 RMSU=  2.35D-07    CP:  1.00D+00  3.00D+00  2.96D+00  2.98D+00
 E= -732.300901929025     Delta-E=       -0.000000000896 Rises=F Damp=F
 DIIS: error= 7.74D-08 at cycle  25 NSaved=  20.
 NSaved=20 IEnMin=20 EnMin= -732.300901929025     IErMin=20 ErrMin= 7.74D-08
 ErrMax= 7.74D-08  0.00D+00 EMaxC= 1.00D-01 BMatC= 6.55D-12 BMatP= 5.02D-11
 IDIUse=1 WtCom= 1.00D+00 WtEn= 0.00D+00
 Coeff-Com:  0.488D-03 0.747D-04 0.115D-03-0.234D-02-0.251D-03 0.273D-02
 Coeff-Com:  0.300D-02-0.463D-02-0.789D-02 0.870D-02 0.314D-01-0.197D-01
 Coeff-Com: -0.106D+00-0.251D+00 0.452D+00 0.299D+00-0.568D+00-0.149D+00
 Coeff-Com:  0.341D+00 0.971D+00
 Coeff:      0.488D-03 0.747D-04 0.115D-03-0.234D-02-0.251D-03 0.273D-02
 Coeff:      0.300D-02-0.463D-02-0.789D-02 0.870D-02 0.314D-01-0.197D-01
 Coeff:     -0.106D+00-0.251D+00 0.452D+00 0.299D+00-0.568D+00-0.149D+00
 Coeff:      0.341D+00 0.971D+00
 Gap=     0.156 Goal=   None    Shift=    0.000
 Gap=     0.276 Goal=   None    Shift=    0.000
 RMSDP=8.05D-07 MaxDP=7.48D-05 DE=-8.96D-10 OVMax= 3.81D-05

 Error on total polarization charges =  0.04337
 SCF Done:  E(UM062X) =  -732.300901929     A.U. after   25 cycles
            NFock= 25  Conv=0.81D-06     -V/T= 2.0641
 <Sx>= 0.0000 <Sy>= 0.0000 <Sz>= 1.5000 <S**2>= 4.7659 S= 1.7396
 <L.S>=  0.00000000000    
 KE= 6.881851608251D+02 PE=-3.341464945558D+03 EE= 1.079776272607D+03
 SMD-CDS (non-electrostatic) energy       (kcal/mol) =       6.74
 (included in total energy above)
 Annihilation of the first spin contaminant:
 S**2 before annihilation     4.7659,   after     3.7740
 Leave Link  502 at Sat May 27 00:58:59 2023, MaxMem=  2684354560 cpu:            1240.7 elap:             124.5
 (Enter /home/xut/apps/g16/l701.exe)
 ... and contract with generalized density number  0.
 Compute integral first derivatives.
   1 Symmetry operations used in ECPInt.
 ECPInt:  NShTT=    6105 NPrTT=   23469 LenC2=    5813 LenP2D=   15876.
 LDataN:  DoStor=T MaxTD1= 5 Len=  102
 D1PCM: PCM CHGder 1st derivatives, ID1Alg=3 FixD1E=F DoIter=F DoCFld=F I1PDM=0.
 GePol: Maximum number of non-zero 1st derivatives   =     184
 Leave Link  701 at Sat May 27 00:59:00 2023, MaxMem=  2684354560 cpu:              10.3 elap:               1.1
 (Enter /home/xut/apps/g16/l702.exe)
 L702 exits ... SP integral derivatives will be done elsewhere.
 Leave Link  702 at Sat May 27 00:59:00 2023, MaxMem=  2684354560 cpu:               0.2 elap:               0.0
 (Enter /home/xut/apps/g16/l703.exe)
 Integral derivatives from FoFJK, PRISM(SPDF).
 Compute integral first derivatives, UseDBF=F ICtDFT=           0.
 Calling FoFJK, ICntrl=      2127 FMM=F ISym2X=0 I1Cent= 0 IOpClX= 1 NMat=1 NMatS=1 NMatT=0.
 FoFJK:  IHMeth= 1 ICntrl=    2127 DoSepK=F KAlg= 0 I1Cent=           0 FoldK=F
 IRaf=         0 NMat=       1 IRICut=       1 DoRegI=T DoRafI=F ISym2E= 0 IDoP0=0 IntGTp=1.
 FoFCou: FMM=F IPFlag=           0 FMFlag=      100000 FMFlg1=         800
         NFxFlg=           0 DoJE=F BraDBF=F KetDBF=F FulRan=T
         wScrn=  0.000000 ICntrl=      2127 IOpCl=  1 I1Cent=           0 NGrid=           0
[truncated: 827,449 more chars]
