# Supplementary material for: Characterization of the binding process between gallic acid and trivalent chromium in tannery wastewater: a spectroscopic perspective
Source: Royal Society of Chemistry journal article supplement (doi:10.1039/d4em00621f), 2025-01-01
Supplement: d4em00621f2.log [file d4em00621f2.log]

 Entering Gaussian System, Link 0=g16
 Input=149-91-7-O12-Cr.gjf
 Output=149-91-7-O12-Cr.log
 Initial command:
 /home/xut/apps/g16/l1.exe "/home/xut/apps/g16/scratch/xut/656.master/Gau-15892.inp" -scrdir="/home/xut/apps/g16/scratch/xut/656.master/"
 Entering Link 1 = /home/xut/apps/g16/l1.exe PID=     15912.
  
 Copyright (c) 1988,1990,1992,1993,1995,1998,2003,2009,2016,
            Gaussian, Inc.  All Rights Reserved.
  
 This is part of the Gaussian(R) 16 program.  It is based on
 the Gaussian(R) 09 system (copyright 2009, Gaussian, Inc.),
 the Gaussian(R) 03 system (copyright 2003, Gaussian, Inc.),
 the Gaussian(R) 98 system (copyright 1998, Gaussian, Inc.),
 the Gaussian(R) 94 system (copyright 1995, Gaussian, Inc.),
 the Gaussian 92(TM) system (copyright 1992, Gaussian, Inc.),
 the Gaussian 90(TM) system (copyright 1990, Gaussian, Inc.),
 the Gaussian 88(TM) system (copyright 1988, Gaussian, Inc.),
 the Gaussian 86(TM) system (copyright 1986, Carnegie Mellon
 University), and the Gaussian 82(TM) system (copyright 1983,
 Carnegie Mellon University). Gaussian is a federally registered
 trademark of Gaussian, Inc.
  
 This software contains proprietary and confidential information,
 including trade secrets, belonging to Gaussian, Inc.
  
 This software is provided under written license and may be
 used, copied, transmitted, or stored only in accord with that
 written license.
  
 The following legend is applicable only to US Government
 contracts under FAR:
  
                    RESTRICTED RIGHTS LEGEND
  
 Use, reproduction and disclosure by the US Government is
 subject to restrictions as set forth in subparagraphs (a)
 and (c) of the Commercial Computer Software - Restricted
 Rights clause in FAR 52.227-19.
  
 Gaussian, Inc.
 340 Quinnipiac St., Bldg. 40, Wallingford CT 06492
  
  
 ---------------------------------------------------------------
 Warning -- This program may not be used in any manner that
 competes with the business of Gaussian, Inc. or will provide
 assistance to any competitor of Gaussian, Inc.  The licensee
 of this program is prohibited from giving any competitor of
 Gaussian, Inc. access to this program.  By using this program,
 the user acknowledges that Gaussian, Inc. is engaged in the
 business of creating and licensing software in the field of
 computational chemistry and represents and warrants to the
 licensee that it is not a competitor of Gaussian, Inc. and that
 it will not use this program in any manner prohibited above.
 ---------------------------------------------------------------
  

 Cite this work as:
 Gaussian 16, Revision A.03,
 M. J. Frisch, G. W. Trucks, H. B. Schlegel, G. E. Scuseria, 
 M. A. Robb, J. R. Cheeseman, G. Scalmani, V. Barone, 
 G. A. Petersson, H. Nakatsuji, X. Li, M. Caricato, A. V. Marenich, 
 J. Bloino, B. G. Janesko, R. Gomperts, B. Mennucci, H. P. Hratchian, 
 J. V. Ortiz, A. F. Izmaylov, J. L. Sonnenberg, D. Williams-Young, 
 F. Ding, F. Lipparini, F. Egidi, J. Goings, B. Peng, A. Petrone, 
 T. Henderson, D. Ranasinghe, V. G. Zakrzewski, J. Gao, N. Rega, 
 G. Zheng, W. Liang, M. Hada, M. Ehara, K. Toyota, R. Fukuda, 
 J. Hasegawa, M. Ishida, T. Nakajima, Y. Honda, O. Kitao, H. Nakai, 
 T. Vreven, K. Throssell, J. A. Montgomery, Jr., J. E. Peralta, 
 F. Ogliaro, M. J. Bearpark, J. J. Heyd, E. N. Brothers, K. N. Kudin, 
 V. N. Staroverov, T. A. Keith, R. Kobayashi, J. Normand, 
 K. Raghavachari, A. P. Rendell, J. C. Burant, S. S. Iyengar, 
 J. Tomasi, M. Cossi, J. M. Millam, M. Klene, C. Adamo, R. Cammi, 
 J. W. Ochterski, R. L. Martin, K. Morokuma, O. Farkas, 
 J. B. Foresman, and D. J. Fox, Gaussian, Inc., Wallingford CT, 2016.
 
 ******************************************
 Gaussian 16:  ES64L-G16RevA.03 25-Dec-2016
                24-May-2023 
 ******************************************
 %chk=149-91-7-O12-Cr.chk
 %nprocshared=10
 Will use up to   10 processors via shared memory.
 %mem=20GB
 ----------------------------------------------------------------------
 #p opt m062x/genecp scrf=(smd,solvent=water) SCF=conver=6 IOp(7/127=-9
 9)
 ----------------------------------------------------------------------
 1/18=20,19=15,26=3,38=1/1,3;
 2/9=110,12=2,17=6,18=5,40=1/2;
 3/5=7,11=2,16=1,17=8,25=1,30=1,70=32201,71=1,72=1,74=-55/1,2,3;
 4//1;
 5/5=2,6=6,38=5,53=1/2;
 6/7=2,8=2,9=2,10=2,28=1/1;
 7/127=-99/1,2,3,16;
 1/18=20,19=15,26=3/3(2);
 2/9=110/2;
 99//99;
 2/9=110/2;
 3/5=7,6=1,11=2,16=1,17=8,25=1,30=1,70=32205,71=1,72=1,74=-55,82=7/1,2,3;
 4/5=5,16=3,69=1/1;
 5/5=2,6=6,38=5,53=1/2;
 7/127=-99/1,2,3,16;
 1/18=20,19=15,26=3/3(-5);
 2/9=110/2;
 6/7=2,8=2,9=2,10=2,19=2,28=1/1;
 99/9=1/99;
 Leave Link    1 at Wed May 24 01:10:16 2023, MaxMem=  2684354560 cpu:               0.3 elap:               0.0
 (Enter /home/xut/apps/g16/l101.exe)
 -------------------
 Title Card Required
 -------------------
 Symbolic Z-matrix:
 Charge =  3 Multiplicity = 4
 C                    -1.29827  -0.80282   0.22433 
 C                     0.08589  -0.83437   0.21074 
 C                     0.79687   0.36626   0.16073 
 C                     0.12851   1.58964   0.10602 
 C                    -1.2587    1.60733   0.11439 
 C                    -1.97793   0.41543   0.17709 
 H                     0.60331  -1.78556   0.24934 
 H                     0.64554   2.53882   0.02351 
 C                     2.28076   0.27479   0.13572 
 O                     2.99228   1.35401   0.49678 
 H                     2.43889   2.06085   0.85708 
 O                     2.87813  -0.72554  -0.19519 
 O                    -1.91082   2.80443   0.05047 
 H                    -2.86624   2.65491   0.06834 
 O                    -3.33535   0.49289   0.18375 
 H                    -3.71437  -0.397     0.21789 
 O                    -2.09133  -1.91233   0.27941 
 H                    -1.54863  -2.71143   0.27656 
 Cr                    3.91095  -2.40262  -0.79395 
 
 ITRead=  0  0  0  0  0  0  0  0  0  0  0  0  0  0  0  0  0  0  0
 MicOpt= -1 -1 -1 -1 -1 -1 -1 -1 -1 -1 -1 -1 -1 -1 -1 -1 -1 -1 -1
 NAtoms=     19 NQM=       19 NQMF=       0 NMMI=      0 NMMIF=      0
                NMic=       0 NMicF=      0.
                    Isotopes and Nuclear Properties:
 (Nuclear quadrupole moments (NQMom) in fm**2, nuclear magnetic moments (NMagM)
  in nuclear magnetons)

  Atom         1           2           3           4           5           6           7           8           9          10
 IAtWgt=          12          12          12          12          12          12           1           1          12          16
 AtmWgt=  12.0000000  12.0000000  12.0000000  12.0000000  12.0000000  12.0000000   1.0078250   1.0078250  12.0000000  15.9949146
 NucSpn=           0           0           0           0           0           0           1           1           0           0
 AtZEff=  -0.0000000  -0.0000000  -0.0000000  -0.0000000  -0.0000000  -0.0000000  -0.0000000  -0.0000000  -0.0000000  -0.0000000
 NQMom=    0.0000000   0.0000000   0.0000000   0.0000000   0.0000000   0.0000000   0.0000000   0.0000000   0.0000000   0.0000000
 NMagM=    0.0000000   0.0000000   0.0000000   0.0000000   0.0000000   0.0000000   2.7928460   2.7928460   0.0000000   0.0000000
 AtZNuc=   6.0000000   6.0000000   6.0000000   6.0000000   6.0000000   6.0000000   1.0000000   1.0000000   6.0000000   8.0000000

  Atom        11          12          13          14          15          16          17          18          19
 IAtWgt=           1          16          16           1          16           1          16           1          52
 AtmWgt=   1.0078250  15.9949146  15.9949146   1.0078250  15.9949146   1.0078250  15.9949146   1.0078250  51.9405097
 NucSpn=           1           0           0           1           0           1           0           1           0
 AtZEff=  -0.0000000  -0.0000000  -0.0000000  -0.0000000  -0.0000000  -0.0000000  -0.0000000  -0.0000000  -0.0000000
 NQMom=    0.0000000   0.0000000   0.0000000   0.0000000   0.0000000   0.0000000   0.0000000   0.0000000   0.0000000
 NMagM=    2.7928460   0.0000000   0.0000000   2.7928460   0.0000000   2.7928460   0.0000000   2.7928460   0.0000000
 AtZNuc=   1.0000000   8.0000000   8.0000000   1.0000000   8.0000000   1.0000000   8.0000000   1.0000000  24.0000000
 Leave Link  101 at Wed May 24 01:10:16 2023, MaxMem=  2684354560 cpu:               4.8 elap:               0.5
 (Enter /home/xut/apps/g16/l103.exe)

 GradGradGradGradGradGradGradGradGradGradGradGradGradGradGradGradGradGrad
 Berny optimization.
 Initialization pass.
                           ----------------------------
                           !    Initial Parameters    !
                           ! (Angstroms and Degrees)  !
 --------------------------                            --------------------------
 ! Name  Definition              Value          Derivative Info.                !
 --------------------------------------------------------------------------------
 ! R1    R(1,2)                  1.3846         estimate D2E/DX2                !
 ! R2    R(1,6)                  1.3958         estimate D2E/DX2                !
 ! R3    R(1,17)                 1.3649         estimate D2E/DX2                !
 ! R4    R(2,3)                  1.3963         estimate D2E/DX2                !
 ! R5    R(2,7)                  1.0835         estimate D2E/DX2                !
 ! R6    R(3,4)                  1.3951         estimate D2E/DX2                !
 ! R7    R(3,9)                  1.4869         estimate D2E/DX2                !
 ! R8    R(4,5)                  1.3873         estimate D2E/DX2                !
 ! R9    R(4,8)                  1.084          estimate D2E/DX2                !
 ! R10   R(5,6)                  1.3935         estimate D2E/DX2                !
 ! R11   R(5,13)                 1.3647         estimate D2E/DX2                !
 ! R12   R(6,15)                 1.3596         estimate D2E/DX2                !
 ! R13   R(9,10)                 1.3421         estimate D2E/DX2                !
 ! R14   R(9,12)                 1.2112         estimate D2E/DX2                !
 ! R15   R(10,11)                0.9673         estimate D2E/DX2                !
 ! R16   R(12,19)                2.0586         estimate D2E/DX2                !
 ! R17   R(13,14)                0.9672         estimate D2E/DX2                !
 ! R18   R(15,16)                0.9678         estimate D2E/DX2                !
 ! R19   R(17,18)                0.966          estimate D2E/DX2                !
 ! A1    A(2,1,6)              120.4201         estimate D2E/DX2                !
 ! A2    A(2,1,17)             124.2443         estimate D2E/DX2                !
 ! A3    A(6,1,17)             115.3354         estimate D2E/DX2                !
 ! A4    A(1,2,3)              119.328          estimate D2E/DX2                !
 ! A5    A(1,2,7)              119.8051         estimate D2E/DX2                !
 ! A6    A(3,2,7)              120.8638         estimate D2E/DX2                !
 ! A7    A(2,3,4)              120.7636         estimate D2E/DX2                !
 ! A8    A(2,3,9)              117.1212         estimate D2E/DX2                !
 ! A9    A(4,3,9)              122.0992         estimate D2E/DX2                !
 ! A10   A(3,4,5)              119.3388         estimate D2E/DX2                !
 ! A11   A(3,4,8)              122.8413         estimate D2E/DX2                !
 ! A12   A(5,4,8)              117.7884         estimate D2E/DX2                !
 ! A13   A(4,5,6)              120.3606         estimate D2E/DX2                !
 ! A14   A(4,5,13)             119.2557         estimate D2E/DX2                !
 ! A15   A(6,5,13)             120.3819         estimate D2E/DX2                !
 ! A16   A(1,6,5)              119.7834         estimate D2E/DX2                !
 ! A17   A(1,6,15)             122.3907         estimate D2E/DX2                !
 ! A18   A(5,6,15)             117.8252         estimate D2E/DX2                !
 ! A19   A(3,9,10)             118.3636         estimate D2E/DX2                !
 ! A20   A(3,9,12)             123.2028         estimate D2E/DX2                !
 ! A21   A(10,9,12)            118.4336         estimate D2E/DX2                !
 ! A22   A(9,10,11)            112.6122         estimate D2E/DX2                !
 ! A23   A(5,13,14)            109.6057         estimate D2E/DX2                !
 ! A24   A(6,15,16)            109.8014         estimate D2E/DX2                !
 ! A25   A(1,17,18)            110.2372         estimate D2E/DX2                !
 ! A26   L(9,12,19,7,-1)       180.8893         estimate D2E/DX2                !
 ! A27   L(9,12,19,7,-2)       179.0491         estimate D2E/DX2                !
 ! D1    D(6,1,2,3)              0.5417         estimate D2E/DX2                !
 ! D2    D(6,1,2,7)            179.9041         estimate D2E/DX2                !
 ! D3    D(17,1,2,3)          -179.6234         estimate D2E/DX2                !
 ! D4    D(17,1,2,7)            -0.2609         estimate D2E/DX2                !
 ! D5    D(2,1,6,5)              0.0694         estimate D2E/DX2                !
 ! D6    D(2,1,6,15)           179.7716         estimate D2E/DX2                !
 ! D7    D(17,1,6,5)          -179.7797         estimate D2E/DX2                !
 ! D8    D(17,1,6,15)           -0.0775         estimate D2E/DX2                !
 ! D9    D(2,1,17,18)           -1.9283         estimate D2E/DX2                !
 ! D10   D(6,1,17,18)          177.9142         estimate D2E/DX2                !
 ! D11   D(1,2,3,4)             -0.8858         estimate D2E/DX2                !
 ! D12   D(1,2,3,9)           -179.4605         estimate D2E/DX2                !
 ! D13   D(7,2,3,4)            179.7586         estimate D2E/DX2                !
 ! D14   D(7,2,3,9)              1.184          estimate D2E/DX2                !
 ! D15   D(2,3,4,5)              0.609          estimate D2E/DX2                !
 ! D16   D(2,3,4,8)           -177.3054         estimate D2E/DX2                !
 ! D17   D(9,3,4,5)            179.1114         estimate D2E/DX2                !
 ! D18   D(9,3,4,8)              1.1971         estimate D2E/DX2                !
 ! D19   D(2,3,9,10)          -159.836          estimate D2E/DX2                !
 ! D20   D(2,3,9,12)            20.2072         estimate D2E/DX2                !
 ! D21   D(4,3,9,10)            21.6098         estimate D2E/DX2                !
 ! D22   D(4,3,9,12)          -158.347          estimate D2E/DX2                !
 ! D23   D(3,4,5,6)              0.0135         estimate D2E/DX2                !
 ! D24   D(3,4,5,13)          -179.5009         estimate D2E/DX2                !
 ! D25   D(8,4,5,6)            178.0328         estimate D2E/DX2                !
 ! D26   D(8,4,5,13)            -1.4816         estimate D2E/DX2                !
 ! D27   D(4,5,6,1)             -0.3507         estimate D2E/DX2                !
 ! D28   D(4,5,6,15)           179.9336         estimate D2E/DX2                !
 ! D29   D(13,5,6,1)           179.1582         estimate D2E/DX2                !
 ! D30   D(13,5,6,15)           -0.5574         estimate D2E/DX2                !
 ! D31   D(4,5,13,14)         -179.8194         estimate D2E/DX2                !
 ! D32   D(6,5,13,14)            0.6662         estimate D2E/DX2                !
 ! D33   D(1,6,15,16)           -0.4279         estimate D2E/DX2                !
 ! D34   D(5,6,15,16)          179.2799         estimate D2E/DX2                !
 ! D35   D(3,9,10,11)            7.7891         estimate D2E/DX2                !
 ! D36   D(12,9,10,11)        -172.2519         estimate D2E/DX2                !
 --------------------------------------------------------------------------------
 Trust Radius=3.00D-01 FncErr=1.00D-07 GrdErr=1.00D-06 EigMax=2.50D+02 EigMin=1.00D-04
 Number of steps in this run=     92 maximum allowed number of steps=    114.
 GradGradGradGradGradGradGradGradGradGradGradGradGradGradGradGradGradGrad

 Leave Link  103 at Wed May 24 01:10:16 2023, MaxMem=  2684354560 cpu:               0.1 elap:               0.0
 (Enter /home/xut/apps/g16/l202.exe)
                          Input orientation:                          
 ---------------------------------------------------------------------
 Center     Atomic      Atomic             Coordinates (Angstroms)
 Number     Number       Type             X           Y           Z
 ---------------------------------------------------------------------
      1          6           0       -1.298269   -0.802817    0.224330
      2          6           0        0.085889   -0.834370    0.210737
      3          6           0        0.796875    0.366264    0.160726
      4          6           0        0.128510    1.589641    0.106022
      5          6           0       -1.258701    1.607335    0.114392
      6          6           0       -1.977931    0.415428    0.177087
      7          1           0        0.603306   -1.785560    0.249342
      8          1           0        0.645543    2.538823    0.023506
      9          6           0        2.280763    0.274788    0.135722
     10          8           0        2.992283    1.354011    0.496780
     11          1           0        2.438888    2.060847    0.857079
     12          8           0        2.878130   -0.725537   -0.195187
     13          8           0       -1.910822    2.804435    0.050467
     14          1           0       -2.866239    2.654906    0.068339
     15          8           0       -3.335350    0.492888    0.183750
     16          1           0       -3.714369   -0.397003    0.217893
     17          8           0       -2.091328   -1.912333    0.279413
     18          1           0       -1.548632   -2.711432    0.276555
     19         24           0        3.910950   -2.402618   -0.793949
 ---------------------------------------------------------------------
                    Distance matrix (angstroms):
                    1          2          3          4          5
     1  C    0.000000
     2  C    1.384584   0.000000
     3  C    2.400088   1.396254   0.000000
     4  C    2.788109   2.426646   1.395118   0.000000
     5  C    2.412983   2.789109   2.401624   1.387349   0.000000
     6  C    1.395813   2.412982   2.775290   2.412658   1.393508
     7  H    2.140653   1.083500   2.162329   3.411445   3.872598
     8  H    3.871084   3.424427   2.182142   1.084010   2.121809
     9  C    3.738790   2.460352   1.486915   2.522283   3.782055
    10  O    4.809883   3.649378   2.430719   2.899898   4.275659
    11  H    4.750504   3.786376   2.460229   2.474665   3.798608
    12  O    4.198128   2.823691   2.377041   3.607102   4.759359
    13  O    3.663020   4.153726   3.645334   2.374381   1.364697
    14  H    3.799830   4.572787   4.320280   3.178794   1.919298
    15  O    2.414580   3.669771   4.134229   3.634176   2.357811
    16  H    2.449952   3.825350   4.575715   4.327469   3.171496
    17  O    1.364918   2.430431   3.680735   4.149888   3.620575
    18  H    1.925674   2.489850   3.871309   4.619645   4.331525
    19  Cr   5.543665   4.254397   4.274994   5.572695   6.605308
                    6          7          8          9         10
     6  C    0.000000
     7  H    3.392986   0.000000
     8  H    3.378611   4.330482   0.000000
     9  C    4.261216   2.659287   2.795066   0.000000
    10  O    5.068152   3.952890   2.671134   1.342142   0.000000
    11  H    4.762151   4.305061   2.034549   1.932710   0.967305
    12  O    5.002171   2.548741   3.960848   1.211197   2.194623
    13  O    2.393301   5.237217   2.570268   4.896506   5.132579
    14  H    2.411676   5.638106   3.513986   5.671079   6.016491
    15  O    1.359644   4.550675   4.478732   5.620552   6.393627
    16  H    1.917531   4.535570   5.259819   6.033213   6.937075
    17  O    2.332767   2.697782   5.231514   4.890739   6.046433
    18  H    3.157759   2.342822   5.695930   4.858149   6.098872
    19  Cr   6.600244   3.522745   5.979043   3.269603   4.077032
                   11         12         13         14         15
    11  H    0.000000
    12  O    3.010670   0.000000
    13  O    4.485925   5.954419   0.000000
    14  H    5.396238   6.670428   0.967212   0.000000
    15  O    6.021104   6.343145   2.718510   2.215334   0.000000
    16  H    6.656738   6.613593   3.678317   3.171094   0.967847
    17  O    6.053323   5.131203   4.725770   4.637317   2.709581
    18  H    6.245956   4.874684   5.532367   5.529650   3.669965
    19  Cr   4.981504   2.058600   7.856174   8.500140   7.864396
                   16         17         18         19
    16  H    0.000000
    17  O    2.221322   0.000000
    18  H    3.170243   0.965964   0.000000
    19  Cr   7.949328   6.117175   5.572108   0.000000
 Stoichiometry    C7H6CrO5(3+,4)
 Framework group  C1[X(C7H6CrO5)]
 Deg. of freedom    51
 Full point group                 C1      NOp   1
 Largest Abelian subgroup         C1      NOp   1
 Largest concise Abelian subgroup C1      NOp   1
                         Standard orientation:                         
 ---------------------------------------------------------------------
 Center     Atomic      Atomic             Coordinates (Angstroms)
 Number     Number       Type             X           Y           Z
 ---------------------------------------------------------------------
      1          6           0       -1.542575   -1.308003    0.189675
      2          6           0       -0.269393   -0.770991    0.277416
      3          6           0       -0.097992    0.608069    0.141990
      4          6           0       -1.189852    1.442706   -0.097963
      5          6           0       -2.459684    0.891452   -0.189526
      6          6           0       -2.643480   -0.482099   -0.043100
      7          1           0        0.577934   -1.421145    0.459932
      8          1           0       -1.090575    2.511287   -0.250799
      9          6           0        1.291166    1.130574    0.232246
     10          8           0        1.466244    2.430203    0.518004
     11          1           0        0.639966    2.873278    0.755969
     12          8           0        2.271733    0.440839    0.059759
     13          8           0       -3.525225    1.708158   -0.434495
     14          1           0       -4.336371    1.182354   -0.467239
     15          8           0       -3.909960   -0.966939   -0.141024
     16          1           0       -3.902097   -1.928719   -0.033110
     17          8           0       -1.825683   -2.637436    0.314015
     18          1           0       -1.011691   -3.142049    0.439992
     19         24           0        3.949034   -0.705994   -0.270802
 ---------------------------------------------------------------------
 Rotational constants (GHZ):           1.1758069           0.2975654           0.2413476
 Leave Link  202 at Wed May 24 01:10:16 2023, MaxMem=  2684354560 cpu:               0.1 elap:               0.0
 (Enter /home/xut/apps/g16/l301.exe)
 General basis read from cards:  (5D, 7F)
 Centers:      19
 LanL2DZ
 ****
 Centers:       1      2      3      4      5      6      9      7      8     11
 Centers:      14     16     18     10     12     13     15     17
 6-311++g(d,p)
 ****
 ======================================================================================================
                                       Pseudopotential Parameters
 ======================================================================================================
  Center     Atomic      Valence      Angular      Power
  Number     Number     Electrons     Momentum     of R      Exponent        Coefficient   SO-Coeffient
 ======================================================================================================
    1          6
                                   No pseudopotential on this center.
    2          6
                                   No pseudopotential on this center.
    3          6
                                   No pseudopotential on this center.
    4          6
                                   No pseudopotential on this center.
    5          6
                                   No pseudopotential on this center.
    6          6
                                   No pseudopotential on this center.
    7          1
                                   No pseudopotential on this center.
    8          1
                                   No pseudopotential on this center.
    9          6
                                   No pseudopotential on this center.
   10          8
                                   No pseudopotential on this center.
   11          1
                                   No pseudopotential on this center.
   12          8
                                   No pseudopotential on this center.
   13          8
                                   No pseudopotential on this center.
   14          1
                                   No pseudopotential on this center.
   15          8
                                   No pseudopotential on this center.
   16          1
                                   No pseudopotential on this center.
   17          8
                                   No pseudopotential on this center.
   18          1
                                   No pseudopotential on this center.
   19         24           14
                                      D and up 
                                                     1      329.2720539      -10.00000000    0.00000000
                                                     2       59.5487597      -57.94093980    0.00000000
                                                     2       14.8265966      -10.26232850    0.00000000
                                      S - D
                                                     0      100.0260653        3.00000000    0.00000000
                                                     1       67.8468124       25.25345990    0.00000000
                                                     2       34.6771006      210.64723660    0.00000000
                                                     2        7.6757005      235.28195870    0.00000000
                                                     2        7.2077427     -152.53434610    0.00000000
                                      P - D
                                                     0       47.9723321        5.00000000    0.00000000
                                                     1       59.6224873        5.63902660    0.00000000
                                                     2       26.0432600      164.83621980    0.00000000
                                                     2        6.5582692      106.01680180    0.00000000
                                                     2        6.1268236      -69.85854680    0.00000000
 ======================================================================================================
 Ernie: Thresh=  0.10000D-02 Tol=  0.10000D-05 Strict=F.
 Ernie:  1 primitive shells out of 216 were deleted.
 There are   342 symmetry adapted cartesian basis functions of A   symmetry.
 There are   328 symmetry adapted basis functions of A   symmetry.
   328 basis functions,   538 primitive gaussians,   342 cartesian basis functions
    51 alpha electrons       48 beta electrons
       nuclear repulsion energy       830.0676671340 Hartrees.
 IExCor= 4336 DFT=T Ex+Corr=M062X ExCW=0 ScaHFX=  0.540000
 ScaDFX=  1.000000  1.000000  1.000000  1.000000 ScalE2=  1.000000  1.000000
 IRadAn=      5 IRanWt=     -1 IRanGd=            0 ICorTp=0 IEmpDi=  4
 NAtoms=   19 NActive=   19 NUniq=   19 SFac= 1.00D+00 NAtFMM=   60 NAOKFM=F Big=F
 Integral buffers will be    131072 words long.
 Raffenetti 2 integral format.
 Two-electron integral symmetry is turned on.
 ------------------------------------------------------------------------------
 Polarizable Continuum Model (PCM)
 =================================
 Model                : PCM.
 Atomic radii         : SMD-Coulomb.
 Polarization charges : Total charges.
 Charge compensation  : None.
 Solution method      : On-the-fly selection.
 Cavity type          : VdW (van der Waals Surface) (Alpha=1.000).
 Cavity algorithm     : GePol (No added spheres)
                        Default sphere list used, NSphG=   19.
                        Lebedev-Laikov grids with approx.  5.0 points / Ang**2.
                        Smoothing algorithm: York/Karplus (Gamma=1.0000).
                        Polarization charges: spherical gaussians, with
                                              point-specific exponents (IZeta= 3).
                        Self-potential: point-specific (ISelfS= 7).
                        Self-field    : sphere-specific E.n sum rule (ISelfD= 2).
 1st derivatives      : Analytical E(r).r(x)/FMM algorithm (CHGder, D1EAlg=3).
                        Cavity 1st derivative terms included.
 Solvent              : Water, Eps=  78.355300 Eps(inf)=   1.777849
 ------------------------------------------------------------------------------
 Spheres list:
 ISph  on   Nord     Re0    Alpha      Xe            Ye            Ze
    1   C      1    1.8500  1.000     -1.542575     -1.308003      0.189675
    2   C      2    1.8500  1.000     -0.269393     -0.770991      0.277416
    3   C      3    1.8500  1.000     -0.097992      0.608069      0.141990
    4   C      4    1.8500  1.000     -1.189852      1.442706     -0.097963
    5   C      5    1.8500  1.000     -2.459684      0.891452     -0.189526
    6   C      6    1.8500  1.000     -2.643480     -0.482099     -0.043100
    7   H      7    1.2000  1.000      0.577934     -1.421145      0.459932
    8   H      8    1.2000  1.000     -1.090575      2.511287     -0.250799
    9   C      9    1.8500  1.000      1.291166      1.130574      0.232246
   10   O     10    1.5200  1.000      1.466244      2.430203      0.518004
   11   H     11    1.2000  1.000      0.639966      2.873278      0.755969
   12   O     12    1.5200  1.000      2.271733      0.440839      0.059759
   13   O     13    1.5200  1.000     -3.525225      1.708158     -0.434495
   14   H     14    1.2000  1.000     -4.336371      1.182354     -0.467239
   15   O     15    1.5200  1.000     -3.909960     -0.966939     -0.141024
   16   H     16    1.2000  1.000     -3.902097     -1.928719     -0.033110
   17   O     17    1.5200  1.000     -1.825683     -2.637436      0.314015
   18   H     18    1.2000  1.000     -1.011691     -3.142049      0.439992
   19  Cr     19    1.5115  1.000      3.949034     -0.705994     -0.270802
 ------------------------------------------------------------------------------
 GePol: Number of generator spheres                  =      19
 GePol: Total number of spheres                      =      19
 GePol: Number of exposed spheres                    =      19 (100.00%)
 GePol: Number of points                             =    1466
 GePol: Average weight of points                     =       0.13
 GePol: Minimum weight of points                     =   0.19D-08
 GePol: Maximum weight of points                     =    0.21991
 GePol: Number of points with low weight             =      67
 GePol: Fraction of low-weight points (<1% of avg)   =       4.57%
 GePol: Cavity surface area                          =    187.126 Ang**2
 GePol: Cavity volume                                =    154.685 Ang**3
 ------------------------------------------------------------------------------
 Atomic radii for non-electrostatic terms: SMD-CDS.
 ------------------------------------------------------------------------------
 PCM non-electrostatic energy =         0.0092153173 Hartrees.
 Nuclear repulsion after PCM non-electrostatic terms =      830.0768824513 Hartrees.
 Leave Link  301 at Wed May 24 01:10:16 2023, MaxMem=  2684354560 cpu:               0.8 elap:               0.1
 (Enter /home/xut/apps/g16/l302.exe)
 NPDir=0 NMtPBC=     1 NCelOv=     1 NCel=       1 NClECP=     1 NCelD=      1
         NCelK=      1 NCelE2=     1 NClLst=     1 CellRange=     0.0.
 One-electron integrals computed using PRISM.
 One-electron integral symmetry used in STVInt
   1 Symmetry operations used in ECPInt.
 ECPInt:  NShTT=    6105 NPrTT=   23469 LenC2=    5788 LenP2D=   15737.
 LDataN:  DoStor=T MaxTD1= 4 Len=   56
 NBasis=   328 RedAO= T EigKep=  1.92D-06  NBF=   328
 NBsUse=   327 1.00D-06 EigRej=  7.33D-07 NBFU=   327
 Precomputing XC quadrature grid using
 IXCGrd= 4 IRadAn=           5 IRanWt=          -1 IRanGd=           0 AccXCQ= 0.00D+00.
 Generated NRdTot=       0 NPtTot=           0 NUsed=           0 NTot=          32
 NSgBfM=   342   342   342   342   342 MxSgAt=    19 MxSgA2=    19.
 Leave Link  302 at Wed May 24 01:10:17 2023, MaxMem=  2684354560 cpu:               2.8 elap:               0.3
 (Enter /home/xut/apps/g16/l303.exe)
 DipDrv:  MaxL=1.
 Leave Link  303 at Wed May 24 01:10:17 2023, MaxMem=  2684354560 cpu:               0.4 elap:               0.1
 (Enter /home/xut/apps/g16/l401.exe)
 ExpMin= 1.90D-02 ExpMax= 8.59D+03 ExpMxC= 1.30D+03 IAcc=3 IRadAn=         5 AccDes= 0.00D+00
 Harris functional with IExCor= 1009 and IRadAn=       5 diagonalized for initial guess.
 HarFok:  IExCor= 1009 AccDes= 0.00D+00 IRadAn=         5 IDoV= 1 UseB2=F ITyADJ=14
 ICtDFT=  3500011 ScaDFX=  1.000000  1.000000  1.000000  1.000000
 FoFCou: FMM=F IPFlag=           0 FMFlag=      100000 FMFlg1=           0
         NFxFlg=           0 DoJE=T BraDBF=F KetDBF=T FulRan=T
         wScrn=  0.000000 ICntrl=       500 IOpCl=  0 I1Cent=   200000004 NGrid=           0
         NMat0=    1 NMatS0=      1 NMatT0=    0 NMatD0=    1 NMtDS0=    0 NMtDT0=    0
 Petite list used in FoFCou.
 Harris En= -732.170839475945    
 JPrj=0 DoOrth=F DoCkMO=F.
 Initial guess <Sx>= 0.0000 <Sy>= 0.0000 <Sz>= 1.5000 <S**2>= 3.7500 S= 1.5000
 Leave Link  401 at Wed May 24 01:10:18 2023, MaxMem=  2684354560 cpu:              11.4 elap:               1.2
 (Enter /home/xut/apps/g16/l502.exe)
 Integral symmetry usage will be decided dynamically.
 UHF open shell SCF:
 Using DIIS extrapolation, IDIIS=  1040.
 NGot=  2684354560 LenX=  2684113999 LenY=  2683996594
 Requested convergence on RMS density matrix=1.00D-06 within 128 cycles.
 Requested convergence on MAX density matrix=1.00D-04.
 Requested convergence on             energy=1.00D-04.
 No special actions if energy rises.
 Fock matrices will be formed incrementally for  20 cycles.

 Cycle   1  Pass 1  IDiag  1:
 FoFJK:  IHMeth= 1 ICntrl=       0 DoSepK=F KAlg= 0 I1Cent=           0 FoldK=F
 IRaf= 910000000 NMat=       1 IRICut=       1 DoRegI=T DoRafI=F ISym2E= 0 IDoP0=0 IntGTp=1.
 FoFCou: FMM=F IPFlag=           0 FMFlag=      100000 FMFlg1=           0
         NFxFlg=           0 DoJE=F BraDBF=F KetDBF=F FulRan=T
         wScrn=  0.000000 ICntrl=         0 IOpCl=  1 I1Cent=           0 NGrid=           0
         NMat0=    1 NMatS0=      1 NMatT0=    0 NMatD0=    1 NMtDS0=    0 NMtDT0=    0
 Symmetry not used in FoFCou.
 Inv3:  Mode=1 IEnd=     6447468.
 Iteration    1 A*A^-1 deviation from unit magnitude is 2.89D-15 for    121.
 Iteration    1 A*A^-1 deviation from orthogonality  is 1.91D-15 for   1123    941.
 Iteration    1 A^-1*A deviation from unit magnitude is 2.89D-15 for    732.
 Iteration    1 A^-1*A deviation from orthogonality  is 1.25D-12 for   1131   1109.
 E= -728.337354309060    
 DIIS: error= 4.73D-02 at cycle   1 NSaved=   1.
 NSaved= 1 IEnMin= 1 EnMin= -728.337354309060     IErMin= 1 ErrMin= 4.73D-02
 ErrMax= 4.73D-02  0.00D+00 EMaxC= 1.00D-01 BMatC= 4.47D+00 BMatP= 4.47D+00
 IDIUse=3 WtCom= 5.27D-01 WtEn= 4.73D-01
 Coeff-Com:  0.100D+01
 Coeff-En:   0.100D+01
 Coeff:      0.100D+01
 Gap=    -0.141 Goal=   None    Shift=    0.000
 Gap=     0.237 Goal=   None    Shift=    0.000
 GapD=   -0.141 DampG=0.250 DampE=0.250 DampFc=0.1250 IDamp=-1.
 Damping current iteration by 1.25D-01
 RMSDP=1.43D+00 MaxDP=1.18D+02              OVMax= 1.00D+00

 Cycle   2  Pass 1  IDiag  1:
 RMSU=  1.70D-01    CP:  1.83D+00
 E= -729.958745475402     Delta-E=       -1.621391166342 Rises=F Damp=T
 DIIS: error= 2.79D-02 at cycle   2 NSaved=   2.
 NSaved= 2 IEnMin= 2 EnMin= -729.958745475402     IErMin= 2 ErrMin= 2.79D-02
 ErrMax= 2.79D-02  0.00D+00 EMaxC= 1.00D-01 BMatC= 1.84D+00 BMatP= 4.47D+00
 IDIUse=3 WtCom= 7.21D-01 WtEn= 2.79D-01
 Coeff-Com: -0.143D+01 0.243D+01
 Coeff-En:   0.000D+00 0.100D+01
 Coeff:     -0.103D+01 0.203D+01
 Gap=     0.032 Goal=   None    Shift=    0.000
 Gap=     0.137 Goal=   None    Shift=    0.000
 RMSDP=1.58D-01 MaxDP=1.27D+01 DE=-1.62D+00 OVMax= 6.98D-01

 Cycle   3  Pass 1  IDiag  1:
 RMSU=  2.93D-02    CP:  1.09D+00  1.35D-01
 E= -721.964124218589     Delta-E=        7.994621256813 Rises=F Damp=F
 DIIS: error= 3.11D-01 at cycle   3 NSaved=   3.
 NSaved= 3 IEnMin= 2 EnMin= -729.958745475402     IErMin= 2 ErrMin= 2.79D-02
 ErrMax= 3.11D-01  0.00D+00 EMaxC= 1.00D-01 BMatC= 2.24D+01 BMatP= 1.84D+00
 IDIUse=2 WtCom= 0.00D+00 WtEn= 1.00D+00
 EnCoef did   100 forward-backward iterations
 Coeff-En:   0.637D+00 0.119D-01 0.351D+00
 Coeff:      0.637D+00 0.119D-01 0.351D+00
 Gap=     0.212 Goal=   None    Shift=    0.000
 Gap=     0.006 Goal=   None    Shift=    0.000
 RMSDP=2.94D-02 MaxDP=2.43D+00 DE= 7.99D+00 OVMax= 9.87D-01

 Cycle   4  Pass 1  IDiag  1:
 RMSU=  1.25D-02    CP:  1.05D+00  2.01D-02  3.91D-01
 E= -731.756546428338     Delta-E=       -9.792422209749 Rises=F Damp=F
 DIIS: error= 4.94D-02 at cycle   4 NSaved=   4.
 NSaved= 4 IEnMin= 4 EnMin= -731.756546428338     IErMin= 2 ErrMin= 2.79D-02
 ErrMax= 4.94D-02  0.00D+00 EMaxC= 1.00D-01 BMatC= 8.62D-01 BMatP= 1.84D+00
 IDIUse=3 WtCom= 5.06D-01 WtEn= 4.94D-01
 EnCoef did   100 forward-backward iterations
 Coeff-Com: -0.653D+00 0.127D+01-0.576D-02 0.388D+00
 Coeff-En:   0.127D+00 0.148D-02 0.000D+00 0.872D+00
 Coeff:     -0.268D+00 0.644D+00-0.292D-02 0.627D+00
 Gap=     0.248 Goal=   None    Shift=    0.000
 Gap=     0.115 Goal=   None    Shift=    0.000
 RMSDP=1.46D-02 MaxDP=8.20D-01 DE=-9.79D+00 OVMax= 9.91D-01

 Cycle   5  Pass 1  IDiag  1:
 RMSU=  1.20D-02    CP:  1.05D+00 -1.24D-02  2.99D-01  5.50D-01
 E= -731.799681394093     Delta-E=       -0.043134965754 Rises=F Damp=F
 DIIS: error= 3.42D-02 at cycle   5 NSaved=   5.
 NSaved= 5 IEnMin= 5 EnMin= -731.799681394093     IErMin= 2 ErrMin= 2.79D-02
 ErrMax= 3.42D-02  0.00D+00 EMaxC= 1.00D-01 BMatC= 1.20D+00 BMatP= 8.62D-01
 IDIUse=2 WtCom= 0.00D+00 WtEn= 1.00D+00
 Coeff-En:   0.000D+00 0.000D+00 0.000D+00 0.477D+00 0.523D+00
 Coeff:      0.000D+00 0.000D+00 0.000D+00 0.477D+00 0.523D+00
 Gap=     0.323 Goal=   None    Shift=    0.000
 Gap=     0.017 Goal=   None    Shift=    0.000
 RMSDP=9.41D-03 MaxDP=6.86D-01 DE=-4.31D-02 OVMax= 2.58D-01

 Cycle   6  Pass 1  IDiag  1:
 RMSU=  5.77D-03    CP:  9.90D-01  8.47D-03  2.96D-01  6.99D-01  5.78D-01
 E= -732.096492795794     Delta-E=       -0.296811401702 Rises=F Damp=F
 DIIS: error= 1.37D-02 at cycle   6 NSaved=   6.
 NSaved= 6 IEnMin= 6 EnMin= -732.096492795794     IErMin= 6 ErrMin= 1.37D-02
 ErrMax= 1.37D-02  0.00D+00 EMaxC= 1.00D-01 BMatC= 2.10D-01 BMatP= 8.62D-01
 IDIUse=3 WtCom= 8.63D-01 WtEn= 1.37D-01
 Coeff-Com: -0.223D+00 0.328D+00 0.610D-02 0.289D+00 0.242D+00 0.358D+00
 Coeff-En:   0.000D+00 0.000D+00 0.000D+00 0.109D+00 0.000D+00 0.891D+00
 Coeff:     -0.193D+00 0.283D+00 0.526D-02 0.265D+00 0.208D+00 0.431D+00
 Gap=     0.181 Goal=   None    Shift=    0.000
 Gap=     0.048 Goal=   None    Shift=    0.000
 RMSDP=2.77D-03 MaxDP=1.66D-01 DE=-2.97D-01 OVMax= 9.48D-02

 Cycle   7  Pass 1  IDiag  1:
 RMSU=  2.06D-03    CP:  9.77D-01  1.23D-02  3.34D-01  6.19D-01  5.67D-01
                    CP:  9.81D-01
 E= -732.112890552373     Delta-E=       -0.016397756579 Rises=F Damp=F
 DIIS: error= 1.17D-02 at cycle   7 NSaved=   7.
 NSaved= 7 IEnMin= 7 EnMin= -732.112890552373     IErMin= 7 ErrMin= 1.17D-02
 ErrMax= 1.17D-02  0.00D+00 EMaxC= 1.00D-01 BMatC= 1.30D-01 BMatP= 2.10D-01
 IDIUse=3 WtCom= 8.83D-01 WtEn= 1.17D-01
 Coeff-Com: -0.138D+00 0.214D+00 0.811D-02 0.106D+00-0.195D+00-0.182D+00
 Coeff-Com:  0.119D+01
 Coeff-En:   0.000D+00 0.000D+00 0.000D+00 0.906D-01 0.000D+00 0.000D+00
 Coeff-En:   0.909D+00
 Coeff:     -0.122D+00 0.189D+00 0.717D-02 0.104D+00-0.173D+00-0.161D+00
 Coeff:      0.116D+01
 Gap=     0.068 Goal=   None    Shift=    0.000
 Gap=     0.032 Goal=   None    Shift=    0.000
 RMSDP=4.98D-03 MaxDP=3.05D-01 DE=-1.64D-02 OVMax= 1.44D-01

 Cycle   8  Pass 1  IDiag  1:
 RMSU=  2.57D-03    CP:  9.34D-01  1.16D-02  3.62D-01  5.40D-01  3.64D-01
                    CP:  9.81D-01  1.79D+00
 E= -732.153737888864     Delta-E=       -0.040847336491 Rises=F Damp=F
 DIIS: error= 4.62D-03 at cycle   8 NSaved=   8.
 NSaved= 8 IEnMin= 8 EnMin= -732.153737888864     IErMin= 8 ErrMin= 4.62D-03
 ErrMax= 4.62D-03  0.00D+00 EMaxC= 1.00D-01 BMatC= 1.78D-02 BMatP= 1.30D-01
 IDIUse=3 WtCom= 9.54D-01 WtEn= 4.62D-02
 Coeff-Com: -0.138D-01 0.364D-01-0.284D-02 0.678D-01-0.764D-01-0.275D+00
 Coeff-Com:  0.293D+00 0.971D+00
 Coeff-En:   0.000D+00 0.000D+00 0.000D+00 0.000D+00 0.000D+00 0.000D+00
 Coeff-En:   0.000D+00 0.100D+01
 Coeff:     -0.131D-01 0.347D-01-0.271D-02 0.647D-01-0.729D-01-0.262D+00
 Coeff:      0.280D+00 0.972D+00
 Gap=     0.038 Goal=   None    Shift=    0.000
 Gap=     0.018 Goal=   None    Shift=    0.000
 RMSDP=4.23D-03 MaxDP=3.03D-01 DE=-4.08D-02 OVMax= 4.98D-01

 Cycle   9  Pass 1  IDiag  1:
 RMSU=  2.20D-03    CP:  8.99D-01  1.22D-02  3.66D-01  5.24D-01  2.18D-01
                    CP:  8.13D-01  2.31D+00  1.63D+00
 E= -732.170331239429     Delta-E=       -0.016593350565 Rises=F Damp=F
 DIIS: error= 5.91D-03 at cycle   9 NSaved=   9.
 NSaved= 9 IEnMin= 9 EnMin= -732.170331239429     IErMin= 8 ErrMin= 4.62D-03
 ErrMax= 5.91D-03  0.00D+00 EMaxC= 1.00D-01 BMatC= 3.99D-02 BMatP= 1.78D-02
 IDIUse=3 WtCom= 9.54D-01 WtEn= 4.62D-02
 Coeff-Com: -0.555D-02 0.187D-01-0.299D-02 0.350D-01-0.658D-01-0.145D+00
 Coeff-Com:  0.297D+00 0.612D+00 0.257D+00
 Coeff-En:   0.000D+00 0.000D+00 0.000D+00 0.000D+00 0.000D+00 0.000D+00
 Coeff-En:   0.000D+00 0.000D+00 0.100D+01
 Coeff:     -0.529D-02 0.179D-01-0.286D-02 0.334D-01-0.628D-01-0.139D+00
 Coeff:      0.283D+00 0.584D+00 0.291D+00
 Gap=     0.078 Goal=   None    Shift=    0.000
 Gap=     0.043 Goal=   None    Shift=    0.000
 RMSDP=1.58D-03 MaxDP=8.96D-02 DE=-1.66D-02 OVMax= 1.61D-01

 Cycle  10  Pass 1  IDiag  1:
 RMSU=  1.03D-03    CP:  9.03D-01  8.95D-03  3.54D-01  5.52D-01  2.37D-01
                    CP:  7.54D-01  2.14D+00  1.47D+00  1.27D+00
 E= -732.178525024668     Delta-E=       -0.008193785239 Rises=F Damp=F
 DIIS: error= 7.58D-03 at cycle  10 NSaved=  10.
 NSaved=10 IEnMin=10 EnMin= -732.178525024668     IErMin= 8 ErrMin= 4.62D-03
 ErrMax= 7.58D-03  0.00D+00 EMaxC= 1.00D-01 BMatC= 4.86D-02 BMatP= 1.78D-02
 IDIUse=3 WtCom= 9.54D-01 WtEn= 4.62D-02
 Coeff-Com: -0.643D-02 0.200D-01-0.306D-02 0.245D-01-0.725D-01-0.125D+00
 Coeff-Com:  0.354D+00 0.511D+00-0.103D+00 0.401D+00
 Coeff-En:   0.000D+00 0.000D+00 0.000D+00 0.000D+00 0.000D+00 0.000D+00
 Coeff-En:   0.000D+00 0.000D+00 0.000D+00 0.100D+01
 Coeff:     -0.614D-02 0.190D-01-0.292D-02 0.234D-01-0.691D-01-0.119D+00
 Coeff:      0.338D+00 0.487D+00-0.984D-01 0.428D+00
 Gap=     0.097 Goal=   None    Shift=    0.000
 Gap=     0.049 Goal=   None    Shift=    0.000
 RMSDP=1.10D-03 MaxDP=6.66D-02 DE=-8.19D-03 OVMax= 1.35D-01

 Cycle  11  Pass 1  IDiag  1:
 RMSU=  2.79D-04    CP:  9.05D-01  7.73D-03  3.47D-01  5.66D-01  2.47D-01
                    CP:  7.11D-01  2.09D+00  1.31D+00  1.48D+00  1.71D+00
 E= -732.184348893625     Delta-E=       -0.005823868957 Rises=F Damp=F
 DIIS: error= 9.70D-03 at cycle  11 NSaved=  11.
 NSaved=11 IEnMin=11 EnMin= -732.184348893625     IErMin= 8 ErrMin= 4.62D-03
 ErrMax= 9.70D-03  0.00D+00 EMaxC= 1.00D-01 BMatC= 5.86D-02 BMatP= 1.78D-02
 IDIUse=3 WtCom= 9.54D-01 WtEn= 4.62D-02
 Coeff-Com: -0.201D-02 0.143D-01-0.201D-02 0.173D-01-0.687D-01-0.105D+00
 Coeff-Com:  0.320D+00 0.396D+00 0.724D-01 0.204D+01-0.168D+01
 Coeff-En:   0.000D+00 0.000D+00 0.000D+00 0.000D+00 0.000D+00 0.000D+00
 Coeff-En:   0.000D+00 0.000D+00 0.000D+00 0.000D+00 0.100D+01
 Coeff:     -0.191D-02 0.136D-01-0.191D-02 0.165D-01-0.655D-01-0.100D+00
 Coeff:      0.305D+00 0.378D+00 0.691D-01 0.194D+01-0.155D+01
 Gap=     0.058 Goal=   None    Shift=    0.000
 Gap=     0.047 Goal=   None    Shift=    0.000
 RMSDP=2.12D-03 MaxDP=1.08D-01 DE=-5.82D-03 OVMax= 2.58D-01

 Cycle  12  Pass 1  IDiag  1:
 RMSU=  2.66D-04    CP:  9.00D-01  9.99D-03  3.56D-01  5.34D-01  2.26D-01
                    CP:  8.09D-01  2.22D+00  1.57D+00  1.05D+00  3.73D-01
                    CP: -8.21D-01
 E= -732.173647656678     Delta-E=        0.010701236946 Rises=F Damp=F
 DIIS: error= 5.93D-03 at cycle  12 NSaved=  12.
 NSaved=12 IEnMin=11 EnMin= -732.184348893625     IErMin= 8 ErrMin= 4.62D-03
 ErrMax= 5.93D-03  0.00D+00 EMaxC= 1.00D-01 BMatC= 3.72D-02 BMatP= 1.78D-02
 IDIUse=3 WtCom= 9.54D-01 WtEn= 4.62D-02
 Rare condition: small coef for last iteration:  0.000D+00
 Coeff-Com:  0.237D-02 0.630D-02-0.183D-02 0.122D-01-0.657D-01-0.107D+00
 Coeff-Com:  0.327D+00 0.306D+00-0.640D+00 0.877D+00-0.138D+01 0.166D+01
 Coeff-En:   0.000D+00 0.000D+00 0.000D+00 0.000D+00 0.000D+00 0.000D+00
 Coeff-En:   0.000D+00 0.000D+00 0.000D+00 0.000D+00 0.000D+00 0.100D+01
 Coeff:      0.237D-02 0.630D-02-0.183D-02 0.122D-01-0.657D-01-0.107D+00
 Coeff:      0.327D+00 0.306D+00-0.640D+00 0.877D+00-0.138D+01 0.166D+01
 Gap=     0.044 Goal=   None    Shift=    0.000
 Gap=     0.052 Goal=   None    Shift=    0.000
 RMSDP=7.53D-04 MaxDP=4.33D-02 DE= 1.07D-02 OVMax= 5.78D-02

 Cycle  13  Pass 1  IDiag  1:
 RMSU=  2.64D-04    CP:  8.97D-01  1.12D-02  3.57D-01  5.17D-01  2.07D-01
                    CP:  8.29D-01  2.31D+00  1.65D+00  1.01D+00  1.16D-01
                    CP: -6.85D-01  2.44D+00
 E= -732.170469951244     Delta-E=        0.003177705434 Rises=F Damp=F
 DIIS: error= 6.10D-03 at cycle  13 NSaved=  13.
 NSaved=13 IEnMin=11 EnMin= -732.184348893625     IErMin= 8 ErrMin= 4.62D-03
 ErrMax= 6.10D-03  0.00D+00 EMaxC= 1.00D-01 BMatC= 4.11D-02 BMatP= 1.78D-02
 IDIUse=3 WtCom= 9.54D-01 WtEn= 4.62D-02
 Rare condition: small coef for last iteration:  0.000D+00
 Coeff-Com:  0.236D-02 0.632D-02-0.182D-02 0.122D-01-0.658D-01-0.108D+00
 Coeff-Com:  0.327D+00 0.306D+00-0.649D+00 0.862D+00-0.137D+01 0.166D+01
 Coeff-Com:  0.178D-01
 Coeff-En:   0.000D+00 0.000D+00 0.000D+00 0.000D+00 0.000D+00 0.000D+00
 Coeff-En:   0.000D+00 0.000D+00 0.000D+00 0.000D+00 0.000D+00 0.000D+00
 Coeff-En:   0.100D+01
 Coeff:      0.236D-02 0.632D-02-0.182D-02 0.122D-01-0.658D-01-0.108D+00
 Coeff:      0.327D+00 0.306D+00-0.649D+00 0.862D+00-0.137D+01 0.166D+01
 Coeff:      0.178D-01
 Gap=     0.044 Goal=   None    Shift=    0.000
 Gap=     0.052 Goal=   None    Shift=    0.000
 RMSDP=1.84D-05 MaxDP=1.27D-03 DE= 3.18D-03 OVMax= 2.12D-03

 Cycle  14  Pass 1  IDiag  1:
 RMSU=  3.45D-06    CP:  8.97D-01  1.12D-02  3.57D-01  5.16D-01  2.06D-01
                    CP:  8.29D-01  2.31D+00  1.65D+00  1.01D+00  1.12D-01
                    CP: -6.82D-01  2.49D+00  1.03D+00
 E= -732.170407169624     Delta-E=        0.000062781620 Rises=F Damp=F
 DIIS: error= 6.10D-03 at cycle  14 NSaved=  14.
 NSaved=14 IEnMin=11 EnMin= -732.184348893625     IErMin= 8 ErrMin= 4.62D-03
 ErrMax= 6.10D-03  0.00D+00 EMaxC= 1.00D-01 BMatC= 4.11D-02 BMatP= 1.78D-02
 IDIUse=3 WtCom= 9.54D-01 WtEn= 4.62D-02
 Large coefficients: NSaved= 14 BigCof=   18.87 CofMax=   10.00 Det=-5.97D-08
 Inversion failed.  Reducing to 13 matrices.
 Large coefficients: NSaved= 13 BigCof=   21.20 CofMax=   10.00 Det=-6.04D-08
 Inversion failed.  Reducing to 12 matrices.
 Large coefficients: NSaved= 12 BigCof=   21.11 CofMax=   10.00 Det=-6.04D-08
 Inversion failed.  Reducing to 11 matrices.
 Large coefficients: NSaved= 11 BigCof=   20.60 CofMax=   10.00 Det=-6.04D-08
 Inversion failed.  Reducing to 10 matrices.
 Large coefficients: NSaved= 10 BigCof=   20.75 CofMax=   10.00 Det=-6.06D-08
 Inversion failed.  Reducing to  9 matrices.
 Large coefficients: NSaved=  9 BigCof=   30.26 CofMax=   10.00 Det=-6.11D-08
 Inversion failed.  Reducing to  8 matrices.
 Large coefficients: NSaved=  8 BigCof=   31.34 CofMax=   10.00 Det=-6.57D-08
 Inversion failed.  Reducing to  7 matrices.
 Rare condition: small coef for last iteration:  0.000D+00
 Coeff-Com:  0.374D+00-0.171D+00 0.101D+01-0.204D+01 0.197D+01 0.848D+01
 Coeff-Com: -0.862D+01
 Coeff-En:   0.000D+00 0.000D+00 0.000D+00 0.000D+00 0.000D+00 0.000D+00
 Coeff-En:   0.100D+01
 Coeff:      0.374D+00-0.171D+00 0.101D+01-0.204D+01 0.197D+01 0.848D+01
 Coeff:     -0.862D+01
 Gap=     0.021 Goal=   None    Shift=    0.000
 Gap=     0.057 Goal=   None    Shift=    0.000
 RMSDP=1.37D-03 MaxDP=1.23D-01 DE= 6.28D-05 OVMax= 1.85D-01

 Cycle  15  Pass 1  IDiag  1:
 RMSU=  3.59D-04    CP:  8.94D-01  1.23D-02  3.57D-01  4.89D-01  1.98D-01
                    CP:  8.95D-01  2.45D+00  1.74D+00  6.92D-01 -7.24D-01
                    CP: -1.07D+00  3.00D+00  6.42D-01  3.00D+00
 E= -732.165437484610     Delta-E=        0.004969685014 Rises=F Damp=F
 DIIS: error= 4.26D-03 at cycle  15 NSaved=   8.
 NSaved= 8 IEnMin= 4 EnMin= -732.184348893625     IErMin= 8 ErrMin= 4.26D-03
 ErrMax= 4.26D-03  0.00D+00 EMaxC= 1.00D-01 BMatC= 2.15D-02 BMatP= 1.78D-02
 IDIUse=3 WtCom= 9.54D-01 WtEn= 4.62D-02
 Large coefficients: NSaved=  8 BigCof=   13.92 CofMax=   10.00 Det=-7.31D-08
 Inversion failed.  Reducing to  7 matrices.
 Large coefficients: NSaved=  7 BigCof=   93.49 CofMax=   10.00 Det=-9.88D-08
 Inversion failed.  Reducing to  6 matrices.
 Large coefficients: NSaved=  6 BigCof=   67.79 CofMax=   10.00 Det=-1.13D-07
 Inversion failed.  Reducing to  5 matrices.
 Rare condition: small coef for last iteration:  0.000D+00
 Coeff-Com:  0.947D+00-0.281D+01 0.299D+01-0.117D+01 0.105D+01
 Coeff-En:   0.000D+00 0.000D+00 0.000D+00 0.000D+00 0.100D+01
 Coeff:      0.947D+00-0.281D+01 0.299D+01-0.117D+01 0.105D+01
 Gap=    -0.044 Goal=   None    Shift=    0.000
 Gap=     0.046 Goal=   None    Shift=    0.000
 RMSDP=6.29D-03 MaxDP=6.41D-01 DE= 4.97D-03 OVMax= 9.99D-01

 Cycle  16  Pass 1  IDiag  1:
 RMSU=  4.99D-03    CP:  8.72D-01  1.99D-02  4.18D-01  3.48D-01  1.16D-01
                    CP:  8.92D-01  2.06D+00  2.09D+00  1.51D-01 -8.80D-01
                    CP: -2.09D+00  3.00D+00  5.19D-02  3.00D+00  3.00D+00
 E= -731.273067621035     Delta-E=        0.892369863575 Rises=F Damp=F
 DIIS: error= 9.26D-02 at cycle  16 NSaved=   6.
 NSaved= 6 IEnMin= 2 EnMin= -732.184348893625     IErMin= 5 ErrMin= 4.26D-03
 ErrMax= 9.26D-02  0.00D+00 EMaxC= 1.00D-01 BMatC= 2.60D+00 BMatP= 2.15D-02
 IDIUse=2 WtCom= 0.00D+00 WtEn= 1.00D+00
 Rare condition: small coef for last iteration:  0.000D+00
 Coeff-En:   0.000D+00 0.000D+00 0.000D+00 0.000D+00 0.000D+00 0.100D+01
 Coeff:      0.000D+00 0.000D+00 0.000D+00 0.000D+00 0.000D+00 0.100D+01
 Gap=    -0.670 Goal=   None    Shift=    0.000
 Gap=     0.875 Goal=   None    Shift=    0.000
 RMSDP=7.49D-02 MaxDP=5.94D+00 DE= 8.92D-01 OVMax= 9.99D-01

 Cycle  17  Pass 1  IDiag  1:
 RMSU=  4.90D-02    CP:  1.60D+00  1.01D-01  1.36D-01 -6.89D-01  1.04D+00
                    CP:  4.68D-01 -3.00D+00  1.41D-01  3.00D+00 -3.00D+00
                    CP:  3.00D+00  3.00D+00 -3.00D+00  3.00D+00  3.00D+00
                    CP: -7.36D-01
 E= -727.333653724142     Delta-E=        3.939413896893 Rises=F Damp=F
 DIIS: error= 9.02D-02 at cycle  17 NSaved=   7.
 NSaved= 7 IEnMin= 2 EnMin= -732.184348893625     IErMin= 5 ErrMin= 4.26D-03
 ErrMax= 9.02D-02  0.00D+00 EMaxC= 1.00D-01 BMatC= 6.90D+00 BMatP= 2.15D-02
 IDIUse=2 WtCom= 0.00D+00 WtEn= 1.00D+00
 Coeff-En:   0.000D+00 0.000D+00 0.000D+00 0.000D+00 0.000D+00 0.763D+00
 Coeff-En:   0.237D+00
 Coeff:      0.000D+00 0.000D+00 0.000D+00 0.000D+00 0.000D+00 0.763D+00
 Coeff:      0.237D+00
 Gap=     0.024 Goal=   None    Shift=    0.000
 Gap=     0.349 Goal=   None    Shift=    0.000
 RMSDP=6.87D-02 MaxDP=6.24D+00 DE= 3.94D+00 OVMax= 9.98D-01

 Cycle  18  Pass 1  IDiag  1:
 RMSU=  8.93D-03    CP:  9.94D-01 -2.14D-02  1.72D-01  5.14D-01  6.17D-01
                    CP:  5.26D-03  6.60D-01  4.22D-02  3.60D-01  2.31D+00
                    CP:  3.00D+00  3.00D+00 -3.00D+00  3.00D+00  1.25D+00
                    CP: -2.35D-01  6.00D-02
 E= -731.970630970094     Delta-E=       -4.636977245952 Rises=F Damp=F
 DIIS: error= 2.58D-02 at cycle  18 NSaved=   8.
 NSaved= 8 IEnMin= 2 EnMin= -732.184348893625     IErMin= 5 ErrMin= 4.26D-03
 ErrMax= 2.58D-02  0.00D+00 EMaxC= 1.00D-01 BMatC= 6.27D-01 BMatP= 2.15D-02
 IDIUse=2 WtCom= 0.00D+00 WtEn= 1.00D+00
 Coeff-En:   0.000D+00 0.000D+00 0.000D+00 0.000D+00 0.000D+00 0.277D+00
 Coeff-En:   0.000D+00 0.723D+00
 Coeff:      0.000D+00 0.000D+00 0.000D+00 0.000D+00 0.000D+00 0.277D+00
 Coeff:      0.000D+00 0.723D+00
 Gap=     0.215 Goal=   None    Shift=    0.000
 Gap=     0.255 Goal=   None    Shift=    0.000
 RMSDP=1.44D-02 MaxDP=2.06D+00 DE=-4.64D+00 OVMax= 9.94D-01

 Cycle  19  Pass 1  IDiag  1:
 RMSU=  2.65D-03    CP:  9.31D-01  4.47D-03  3.31D-01  4.87D-01  4.70D-01
                    CP:  8.74D-01  1.16D+00  5.21D-01  3.63D-01  2.13D+00
                    CP:  2.89D+00  3.00D+00 -2.49D-01  3.00D+00  3.00D+00
                    CP:  8.02D-01 -3.02D-03  6.17D-02
 E= -731.951506747011     Delta-E=        0.019124223084 Rises=F Damp=F
 DIIS: error= 5.21D-02 at cycle  19 NSaved=   9.
 NSaved= 9 IEnMin= 2 EnMin= -732.184348893625     IErMin= 5 ErrMin= 4.26D-03
 ErrMax= 5.21D-02  0.00D+00 EMaxC= 1.00D-01 BMatC= 5.47D-01 BMatP= 2.15D-02
 IDIUse=2 WtCom= 0.00D+00 WtEn= 1.00D+00
 Coeff-En:   0.000D+00 0.000D+00 0.000D+00 0.000D+00 0.000D+00 0.000D+00
 Coeff-En:   0.000D+00 0.513D+00 0.487D+00
 Coeff:      0.000D+00 0.000D+00 0.000D+00 0.000D+00 0.000D+00 0.000D+00
 Coeff:      0.000D+00 0.513D+00 0.487D+00
 Gap=    -0.006 Goal=   None    Shift=    0.000
 Gap=     0.332 Goal=   None    Shift=    0.000
 RMSDP=7.83D-03 MaxDP=1.11D+00 DE= 1.91D-02 OVMax= 8.30D-01

 Cycle  20  Pass 1  IDiag  1:
 RMSU=  2.85D-03    CP:  9.85D-01 -1.19D-03  2.69D-01  5.67D-01  5.59D-01
                    CP:  8.09D-01  1.19D+00 -1.78D-01  6.98D-01  3.00D+00
                    CP:  3.00D+00  3.00D+00  6.24D-01  3.00D+00  1.52D+00
                    CP: -1.96D-02  1.63D-02  4.21D-01  8.12D-01
 E= -732.157381898589     Delta-E=       -0.205875151578 Rises=F Damp=F
 DIIS: error= 1.03D-02 at cycle  20 NSaved=  10.
 NSaved=10 IEnMin= 2 EnMin= -732.184348893625     IErMin= 5 ErrMin= 4.26D-03
 ErrMax= 1.03D-02  0.00D+00 EMaxC= 1.00D-01 BMatC= 9.23D-02 BMatP= 2.15D-02
 IDIUse=2 WtCom= 0.00D+00 WtEn= 1.00D+00
 Coeff-En:   0.000D+00 0.000D+00 0.000D+00 0.000D+00 0.000D+00 0.000D+00
 Coeff-En:   0.000D+00 0.000D+00 0.215D+00 0.785D+00
 Coeff:      0.000D+00 0.000D+00 0.000D+00 0.000D+00 0.000D+00 0.000D+00
 Coeff:      0.000D+00 0.000D+00 0.215D+00 0.785D+00
 Gap=     0.018 Goal=   None    Shift=    0.000
 Gap=     0.263 Goal=   None    Shift=    0.000
 RMSDP=5.85D-03 MaxDP=7.26D-01 DE=-2.06D-01 OVMax= 6.25D-01

 Cycle  21  Pass 1  IDiag  1:
 Restarting incremental Fock formation.
 E= -732.209271141047     Delta-E=       -0.051889242458 Rises=F Damp=F
 DIIS: error= 1.41D-02 at cycle  21 NSaved=  11.
 NSaved=11 IEnMin=11 EnMin= -732.209271141047     IErMin= 5 ErrMin= 4.26D-03
 ErrMax= 1.41D-02  0.00D+00 EMaxC= 1.00D-01 BMatC= 6.98D-02 BMatP= 2.15D-02
 IDIUse=2 WtCom= 0.00D+00 WtEn= 1.00D+00
 Coeff-En:   0.000D+00 0.000D+00 0.000D+00 0.000D+00 0.000D+00 0.000D+00
 Coeff-En:   0.000D+00 0.000D+00 0.000D+00 0.531D-01 0.947D+00
 Coeff:      0.000D+00 0.000D+00 0.000D+00 0.000D+00 0.000D+00 0.000D+00
 Coeff:      0.000D+00 0.000D+00 0.000D+00 0.531D-01 0.947D+00
 Gap=     0.063 Goal=   None    Shift=    0.000
 Gap=     0.442 Goal=   None    Shift=    0.000
 RMSDP=8.02D-03 MaxDP=1.19D+00 DE=-5.19D-02 OVMax= 3.76D-01

 Cycle  22  Pass 1  IDiag  1:
 RMSU=  6.56D-03    CP:  1.07D+00
 E= -732.261381115282     Delta-E=       -0.052109974235 Rises=F Damp=F
 DIIS: error= 6.57D-03 at cycle  22 NSaved=  12.
 NSaved=12 IEnMin=12 EnMin= -732.261381115282     IErMin= 5 ErrMin= 4.26D-03
 ErrMax= 6.57D-03  0.00D+00 EMaxC= 1.00D-01 BMatC= 3.08D-02 BMatP= 2.15D-02
 IDIUse=3 WtCom= 9.54D-01 WtEn= 4.62D-02
 Coeff-Com:  0.976D+00-0.132D+01 0.112D+01-0.777D+00 0.703D+00-0.107D-01
 Coeff-Com:  0.279D-02 0.200D-01 0.275D-01 0.153D+00 0.498D-01 0.513D-01
 Coeff-En:   0.000D+00 0.000D+00 0.000D+00 0.000D+00 0.000D+00 0.000D+00
 Coeff-En:   0.000D+00 0.000D+00 0.000D+00 0.000D+00 0.000D+00 0.100D+01
 Coeff:      0.931D+00-0.126D+01 0.107D+01-0.741D+00 0.671D+00-0.102D-01
 Coeff:      0.266D-02 0.191D-01 0.262D-01 0.146D+00 0.475D-01 0.951D-01
 Gap=     0.020 Goal=   None    Shift=    0.000
 Gap=     0.260 Goal=   None    Shift=    0.000
 RMSDP=1.24D-02 MaxDP=1.62D+00 DE=-5.21D-02 OVMax= 3.67D-01

 Cycle  23  Pass 1  IDiag  1:
 RMSU=  3.82D-03    CP:  9.69D-01 -4.87D-01
 E= -732.202111058131     Delta-E=        0.059270057151 Rises=F Damp=F
 DIIS: error= 1.17D-02 at cycle  23 NSaved=  13.
 NSaved=13 IEnMin=12 EnMin= -732.261381115282     IErMin= 5 ErrMin= 4.26D-03
 ErrMax= 1.17D-02  0.00D+00 EMaxC= 1.00D-01 BMatC= 4.25D-02 BMatP= 2.15D-02
 IDIUse=2 WtCom= 0.00D+00 WtEn= 1.00D+00
 Rare condition: small coef for last iteration:  0.000D+00
 Coeff-En:   0.000D+00 0.000D+00 0.000D+00 0.000D+00 0.000D+00 0.000D+00
 Coeff-En:   0.000D+00 0.000D+00 0.000D+00 0.000D+00 0.000D+00 0.000D+00
 Coeff-En:   0.100D+01
 Coeff:      0.000D+00 0.000D+00 0.000D+00 0.000D+00 0.000D+00 0.000D+00
 Coeff:      0.000D+00 0.000D+00 0.000D+00 0.000D+00 0.000D+00 0.000D+00
 Coeff:      0.100D+01
 Gap=     0.066 Goal=   None    Shift=    0.000
 Gap=     0.283 Goal=   None    Shift=    0.000
 RMSDP=6.76D-03 MaxDP=5.62D-01 DE= 5.93D-02 OVMax= 2.67D-01

 Cycle  24  Pass 1  IDiag  1:
 RMSU=  2.04D-03    CP:  1.01D+00  3.36D-01  4.01D-01
 E= -732.261675378161     Delta-E=       -0.059564320030 Rises=F Damp=F
 DIIS: error= 6.49D-03 at cycle  24 NSaved=  14.
 NSaved=14 IEnMin=14 EnMin= -732.261675378161     IErMin= 5 ErrMin= 4.26D-03
 ErrMax= 6.49D-03  0.00D+00 EMaxC= 1.00D-01 BMatC= 1.04D-02 BMatP= 2.15D-02
 IDIUse=3 WtCom= 9.54D-01 WtEn= 4.62D-02
 Coeff-Com:  0.887D+00-0.115D+01 0.132D+01-0.121D+01 0.793D+00-0.240D-01
 Coeff-Com:  0.354D-02 0.362D-01 0.488D-01 0.811D-01-0.392D-01 0.108D+00
 Coeff-Com:  0.215D+00-0.794D-01
 Coeff-En:   0.000D+00 0.000D+00 0.000D+00 0.000D+00 0.000D+00 0.000D+00
 Coeff-En:   0.000D+00 0.000D+00 0.000D+00 0.000D+00 0.000D+00 0.000D+00
 Coeff-En:   0.000D+00 0.100D+01
 Coeff:      0.846D+00-0.110D+01 0.126D+01-0.115D+01 0.756D+00-0.229D-01
 Coeff:      0.338D-02 0.345D-01 0.466D-01 0.773D-01-0.374D-01 0.103D+00
 Coeff:      0.205D+00-0.295D-01
 Gap=     0.027 Goal=   None    Shift=    0.000
 Gap=     0.249 Goal=   None    Shift=    0.000
 RMSDP=6.61D-03 MaxDP=6.54D-01 DE=-5.96D-02 OVMax= 2.06D-01

 Cycle  25  Pass 1  IDiag  1:
 RMSU=  1.10D-03    CP:  9.65D-01 -4.68D-01  9.46D-01  3.32D-01
 E= -732.215111365095     Delta-E=        0.046564013066 Rises=F Damp=F
 DIIS: error= 1.55D-02 at cycle  25 NSaved=  15.
 NSaved=15 IEnMin=14 EnMin= -732.261675378161     IErMin= 5 ErrMin= 4.26D-03
 ErrMax= 1.55D-02  0.00D+00 EMaxC= 1.00D-01 BMatC= 8.72D-02 BMatP= 1.04D-02
 IDIUse=2 WtCom= 0.00D+00 WtEn= 1.00D+00
 Rare condition: small coef for last iteration:  0.000D+00
 Coeff-En:   0.000D+00 0.000D+00 0.000D+00 0.000D+00 0.000D+00 0.000D+00
 Coeff-En:   0.000D+00 0.000D+00 0.000D+00 0.000D+00 0.000D+00 0.000D+00
 Coeff-En:   0.000D+00 0.000D+00 0.100D+01
 Coeff:      0.000D+00 0.000D+00 0.000D+00 0.000D+00 0.000D+00 0.000D+00
 Coeff:      0.000D+00 0.000D+00 0.000D+00 0.000D+00 0.000D+00 0.000D+00
 Coeff:      0.000D+00 0.000D+00 0.100D+01
 Gap=     0.078 Goal=   None    Shift=    0.000
 Gap=     0.377 Goal=   None    Shift=    0.000
 RMSDP=9.95D-03 MaxDP=1.21D+00 DE= 4.66D-02 OVMax= 2.06D-01

 Cycle  26  Pass 1  IDiag  1:
 RMSU=  7.27D-04    CP:  1.04D+00  7.72D-01  3.47D-01  9.98D-01  1.59D-01
 E= -732.267727302628     Delta-E=       -0.052615937534 Rises=F Damp=F
 DIIS: error= 5.64D-03 at cycle  26 NSaved=  16.
 NSaved=16 IEnMin=16 EnMin= -732.267727302628     IErMin= 5 ErrMin= 4.26D-03
 ErrMax= 5.64D-03  0.00D+00 EMaxC= 1.00D-01 BMatC= 2.05D-02 BMatP= 1.04D-02
 IDIUse=3 WtCom= 9.54D-01 WtEn= 4.62D-02
 Coeff-Com:  0.456D+00-0.851D+00 0.121D+01-0.877D+00 0.691D+00-0.274D-01
 Coeff-Com:  0.242D-02-0.285D-02 0.621D-01 0.209D+00 0.279D-01 0.239D-02
 Coeff-Com: -0.218D-01-0.592D+00 0.215D+00 0.494D+00
 Coeff-En:   0.000D+00 0.000D+00 0.000D+00 0.000D+00 0.000D+00 0.000D+00
 Coeff-En:   0.000D+00 0.000D+00 0.000D+00 0.000D+00 0.000D+00 0.000D+00
 Coeff-En:   0.000D+00 0.000D+00 0.000D+00 0.100D+01
 Coeff:      0.435D+00-0.812D+00 0.116D+01-0.837D+00 0.659D+00-0.262D-01
 Coeff:      0.231D-02-0.271D-02 0.592D-01 0.199D+00 0.266D-01 0.228D-02
 Coeff:     -0.208D-01-0.564D+00 0.205D+00 0.518D+00
 Gap=     0.016 Goal=   None    Shift=    0.000
 Gap=     0.261 Goal=   None    Shift=    0.000
 RMSDP=8.79D-03 MaxDP=1.05D+00 DE=-5.26D-02 OVMax= 2.21D-01

 Cycle  27  Pass 1  IDiag  1:
 RMSU=  4.67D-04    CP:  9.76D-01 -3.38D-01  8.52D-01  3.59D-01  3.89D-01
                    CP:  2.09D-03
 E= -732.227641544813     Delta-E=        0.040085757815 Rises=F Damp=F
 DIIS: error= 1.06D-02 at cycle  27 NSaved=  17.
 NSaved=17 IEnMin=16 EnMin= -732.267727302628     IErMin= 5 ErrMin= 4.26D-03
 ErrMax= 1.06D-02  0.00D+00 EMaxC= 1.00D-01 BMatC= 4.79D-02 BMatP= 1.04D-02
 IDIUse=2 WtCom= 0.00D+00 WtEn= 1.00D+00
 Rare condition: small coef for last iteration:  0.000D+00
 Coeff-En:   0.000D+00 0.000D+00 0.000D+00 0.000D+00 0.000D+00 0.000D+00
 Coeff-En:   0.000D+00 0.000D+00 0.000D+00 0.000D+00 0.000D+00 0.000D+00
 Coeff-En:   0.000D+00 0.000D+00 0.000D+00 0.000D+00 0.100D+01
 Coeff:      0.000D+00 0.000D+00 0.000D+00 0.000D+00 0.000D+00 0.000D+00
 Coeff:      0.000D+00 0.000D+00 0.000D+00 0.000D+00 0.000D+00 0.000D+00
 Coeff:      0.000D+00 0.000D+00 0.000D+00 0.000D+00 0.100D+01
 Gap=     0.093 Goal=   None    Shift=    0.000
 Gap=     0.357 Goal=   None    Shift=    0.000
 RMSDP=7.43D-03 MaxDP=7.55D-01 DE= 4.01D-02 OVMax= 2.55D-01

 Cycle  28  Pass 1  IDiag  1:
 RMSU=  4.96D-04    CP:  1.03D+00  5.76D-01  2.73D-01  1.11D+00  3.72D-01
                    CP:  5.85D-01 -4.17D-01
 E= -732.272742622906     Delta-E=       -0.045101078093 Rises=F Damp=F
 DIIS: error= 4.37D-03 at cycle  28 NSaved=  18.
 NSaved=18 IEnMin=18 EnMin= -732.272742622906     IErMin= 5 ErrMin= 4.26D-03
 ErrMax= 4.37D-03  0.00D+00 EMaxC= 1.00D-01 BMatC= 9.19D-03 BMatP= 1.04D-02
 IDIUse=3 WtCom= 9.56D-01 WtEn= 4.37D-02
 Coeff-Com: -0.609D+00 0.828D-01 0.780D+00-0.549D+00 0.710D+00-0.835D-02
 Coeff-Com:  0.196D-02 0.207D-01 0.254D-01 0.107D+00-0.731D-01 0.213D+00
 Coeff-Com: -0.567D-01-0.106D+01-0.266D+00-0.868D+00 0.607D+00 0.195D+01
 Coeff-En:   0.000D+00 0.000D+00 0.000D+00 0.000D+00 0.000D+00 0.000D+00
 Coeff-En:   0.000D+00 0.000D+00 0.000D+00 0.000D+00 0.000D+00 0.000D+00
 Coeff-En:   0.000D+00 0.000D+00 0.000D+00 0.000D+00 0.000D+00 0.100D+01
 Coeff:     -0.582D+00 0.792D-01 0.746D+00-0.525D+00 0.679D+00-0.798D-02
 Coeff:      0.187D-02 0.198D-01 0.243D-01 0.102D+00-0.699D-01 0.204D+00
 Coeff:     -0.542D-01-0.102D+01-0.254D+00-0.830D+00 0.580D+00 0.190D+01
 Gap=     0.064 Goal=   None    Shift=    0.000
 Gap=     0.261 Goal=   None    Shift=    0.000
 RMSDP=5.01D-03 MaxDP=6.88D-01 DE=-4.51D-02 OVMax= 1.78D-01

 Cycle  29  Pass 1  IDiag  1:
 RMSU=  7.39D-04    CP:  9.86D-01 -2.25D-02  3.98D-01  1.06D+00  1.30D+00
                    CP:  4.31D-01 -5.15D-01  2.65D+00
 E= -732.267260676703     Delta-E=        0.005481946203 Rises=F Damp=F
 DIIS: error= 5.53D-03 at cycle  29 NSaved=  19.
 NSaved=19 IEnMin=18 EnMin= -732.272742622906     IErMin= 5 ErrMin= 4.26D-03
 ErrMax= 5.53D-03  0.00D+00 EMaxC= 1.00D-01 BMatC= 3.82D-02 BMatP= 9.19D-03
 IDIUse=3 WtCom= 9.56D-01 WtEn= 4.37D-02
 Rare condition: small coef for last iteration:  0.000D+00
 Coeff-Com: -0.763D+00 0.212D+00 0.946D+00-0.696D+00 0.551D+00-0.823D-02
 Coeff-Com:  0.103D-02 0.150D-01 0.153D-01 0.723D-01-0.725D-01 0.287D+00
 Coeff-Com:  0.115D+01-0.461D+00-0.325D+00-0.631D+00-0.931D+00 0.101D+01
 Coeff-Com:  0.623D+00
 Coeff-En:   0.000D+00 0.000D+00 0.000D+00 0.000D+00 0.000D+00 0.000D+00
 Coeff-En:   0.000D+00 0.000D+00 0.000D+00 0.000D+00 0.000D+00 0.000D+00
 Coeff-En:   0.000D+00 0.000D+00 0.000D+00 0.666D+00 0.000D+00 0.000D+00
 Coeff-En:   0.334D+00
 Coeff:     -0.763D+00 0.212D+00 0.946D+00-0.696D+00 0.551D+00-0.823D-02
 Coeff:      0.103D-02 0.150D-01 0.153D-01 0.723D-01-0.725D-01 0.287D+00
 Coeff:      0.115D+01-0.461D+00-0.325D+00-0.631D+00-0.931D+00 0.101D+01
 Coeff:      0.623D+00
 Gap=     0.069 Goal=   None    Shift=    0.000
 Gap=     0.218 Goal=   None    Shift=    0.000
 RMSDP=5.26D-04 MaxDP=4.96D-02 DE= 5.48D-03 OVMax= 3.52D-02

 Cycle  30  Pass 1  IDiag  1:
 RMSU=  2.74D-04    CP:  9.82D-01 -4.99D-02  3.80D-01  1.03D+00  1.30D+00
                    CP:  3.74D-01 -9.54D-01  2.89D+00  1.24D+00
 E= -732.266195414123     Delta-E=        0.001065262580 Rises=F Damp=F
 DIIS: error= 5.91D-03 at cycle  30 NSaved=  20.
 NSaved=20 IEnMin=18 EnMin= -732.272742622906     IErMin= 5 ErrMin= 4.26D-03
 ErrMax= 5.91D-03  0.00D+00 EMaxC= 1.00D-01 BMatC= 4.26D-02 BMatP= 9.19D-03
 IDIUse=3 WtCom= 9.56D-01 WtEn= 4.37D-02
 Rare condition: small coef for last iteration:  0.000D+00
 Coeff-Com: -0.770D+00 0.231D+00 0.989D+00-0.753D+00 0.529D+00-0.846D-02
 Coeff-Com:  0.750D-03 0.145D-01 0.154D-01 0.575D-01-0.818D-01 0.286D+00
 Coeff-Com:  0.130D+01-0.530D+00-0.392D+00-0.410D+00-0.994D+00 0.804D+00
 Coeff-Com:  0.333D+00 0.381D+00
 Coeff-En:   0.000D+00 0.000D+00 0.000D+00 0.000D+00 0.000D+00 0.000D+00
 Coeff-En:   0.000D+00 0.000D+00 0.000D+00 0.000D+00 0.000D+00 0.000D+00
 Coeff-En:   0.000D+00 0.000D+00 0.000D+00 0.000D+00 0.000D+00 0.000D+00
 Coeff-En:   0.000D+00 0.100D+01
 Coeff:     -0.770D+00 0.231D+00 0.989D+00-0.753D+00 0.529D+00-0.846D-02
 Coeff:      0.750D-03 0.145D-01 0.154D-01 0.575D-01-0.818D-01 0.286D+00
 Coeff:      0.130D+01-0.530D+00-0.392D+00-0.410D+00-0.994D+00 0.804D+00
 Coeff:      0.333D+00 0.381D+00
 Gap=     0.070 Goal=   None    Shift=    0.000
 Gap=     0.218 Goal=   None    Shift=    0.000
 RMSDP=1.67D-04 MaxDP=1.80D-02 DE= 1.07D-03 OVMax= 1.84D-02

 Cycle  31  Pass 1  IDiag  1:
 RMSU=  8.73D-05    CP:  9.83D-01 -4.02D-02  3.74D-01  1.03D+00  1.26D+00
                    CP:  3.84D-01 -9.84D-01  2.97D+00  1.33D+00  1.26D+00
 E= -732.266724194545     Delta-E=       -0.000528780422 Rises=F Damp=F
 DIIS: error= 6.08D-03 at cycle  31 NSaved=  20.
 NSaved=20 IEnMin=17 EnMin= -732.272742622906     IErMin= 5 ErrMin= 4.26D-03
 ErrMax= 6.08D-03  0.00D+00 EMaxC= 1.00D-01 BMatC= 4.14D-02 BMatP= 9.19D-03
 IDIUse=3 WtCom= 9.56D-01 WtEn= 4.37D-02
 Coeff-Com: -0.879D+00 0.324D+00 0.960D+00-0.739D+00 0.564D+00-0.795D-02
 Coeff-Com:  0.144D-01 0.126D-01 0.597D-01-0.744D-01 0.302D+00 0.113D+01
 Coeff-Com: -0.649D+00-0.357D+00-0.463D+00-0.801D+00 0.967D+00 0.178D+00
 Coeff-Com: -0.585D+00 0.104D+01
 Coeff-En:   0.000D+00 0.000D+00 0.000D+00 0.000D+00 0.000D+00 0.000D+00
 Coeff-En:   0.000D+00 0.000D+00 0.000D+00 0.000D+00 0.000D+00 0.000D+00
 Coeff-En:   0.000D+00 0.000D+00 0.000D+00 0.000D+00 0.000D+00 0.000D+00
 Coeff-En:   0.000D+00 0.100D+01
 Coeff:     -0.841D+00 0.310D+00 0.918D+00-0.707D+00 0.540D+00-0.761D-02
 Coeff:      0.138D-01 0.121D-01 0.571D-01-0.711D-01 0.289D+00 0.108D+01
 Coeff:     -0.620D+00-0.341D+00-0.442D+00-0.766D+00 0.925D+00 0.170D+00
 Coeff:     -0.560D+00 0.104D+01
 Gap=     0.075 Goal=   None    Shift=    0.000
 Gap=     0.232 Goal=   None    Shift=    0.000
 RMSDP=6.39D-04 MaxDP=7.19D-02 DE=-5.29D-04 OVMax= 2.92D-02

 Cycle  32  Pass 1  IDiag  1:
 RMSU=  1.00D-04    CP:  9.88D-01  3.07D-02  3.26D-01  1.03D+00  1.14D+00
                    CP:  4.48D-01 -9.32D-01  3.00D+00  1.36D+00  1.51D+00
                    CP:  2.48D+00
 E= -732.269676805841     Delta-E=       -0.002952611297 Rises=F Damp=F
 DIIS: error= 5.62D-03 at cycle  32 NSaved=  20.
 NSaved=20 IEnMin=16 EnMin= -732.272742622906     IErMin= 5 ErrMin= 4.26D-03
 ErrMax= 5.62D-03  0.00D+00 EMaxC= 1.00D-01 BMatC= 3.30D-02 BMatP= 9.19D-03
 IDIUse=3 WtCom= 9.56D-01 WtEn= 4.37D-02
 Coeff-Com: -0.540D+00 0.107D+00 0.843D+00-0.707D+00 0.545D+00 0.286D-01
 Coeff-Com: -0.264D-02 0.468D-01-0.423D-01 0.286D+00 0.722D+00-0.424D-02
 Coeff-Com: -0.634D-01-0.959D+00-0.697D+00 0.851D+00 0.578D+00-0.108D+01
 Coeff-Com: -0.237D+01 0.346D+01
 Coeff-En:   0.000D+00 0.000D+00 0.000D+00 0.000D+00 0.000D+00 0.000D+00
 Coeff-En:   0.000D+00 0.000D+00 0.000D+00 0.000D+00 0.000D+00 0.000D+00
 Coeff-En:   0.000D+00 0.000D+00 0.000D+00 0.000D+00 0.000D+00 0.000D+00
 Coeff-En:   0.000D+00 0.100D+01
 Coeff:     -0.516D+00 0.102D+00 0.806D+00-0.676D+00 0.521D+00 0.274D-01
 Coeff:     -0.252D-02 0.447D-01-0.404D-01 0.273D+00 0.690D+00-0.405D-02
 Coeff:     -0.606D-01-0.917D+00-0.666D+00 0.814D+00 0.553D+00-0.103D+01
 Coeff:     -0.226D+01 0.335D+01
 Gap=     0.077 Goal=   None    Shift=    0.000
 Gap=     0.237 Goal=   None    Shift=    0.000
 RMSDP=7.48D-04 MaxDP=9.47D-02 DE=-2.95D-03 OVMax= 1.27D-01

 Cycle  33  Pass 1  IDiag  1:
 RMSU=  3.84D-04    CP:  9.92D-01  6.23D-02  2.83D-01  9.25D-01  9.86D-01
                    CP:  6.30D-01 -8.48D-01  3.00D+00  1.49D+00  2.34D+00
                    CP:  3.00D+00  3.00D+00
 E= -732.270789281379     Delta-E=       -0.001112475538 Rises=F Damp=F
 DIIS: error= 6.17D-03 at cycle  33 NSaved=  20.
 NSaved=20 IEnMin=15 EnMin= -732.272742622906     IErMin= 5 ErrMin= 4.26D-03
 ErrMax= 6.17D-03  0.00D+00 EMaxC= 1.00D-01 BMatC= 3.01D-02 BMatP= 9.19D-03
 IDIUse=3 WtCom= 9.56D-01 WtEn= 4.37D-02
 Coeff-Com: -0.539D+00 0.108D+00 0.860D+00-0.718D+00 0.534D+00 0.287D-01
 Coeff-Com:  0.505D-01-0.408D-01 0.283D+00 0.731D+00 0.103D-01-0.621D-01
 Coeff-Com: -0.953D+00-0.717D+00 0.831D+00 0.626D+00-0.770D+00-0.271D+01
 Coeff-Com:  0.331D+01 0.146D+00
 Coeff-En:   0.000D+00 0.000D+00 0.000D+00 0.000D+00 0.000D+00 0.000D+00
 Coeff-En:   0.000D+00 0.000D+00 0.000D+00 0.000D+00 0.000D+00 0.000D+00
 Coeff-En:   0.000D+00 0.000D+00 0.000D+00 0.000D+00 0.000D+00 0.000D+00
 Coeff-En:   0.000D+00 0.100D+01
 Coeff:     -0.516D+00 0.103D+00 0.822D+00-0.687D+00 0.511D+00 0.275D-01
 Coeff:      0.483D-01-0.390D-01 0.271D+00 0.699D+00 0.989D-02-0.594D-01
 Coeff:     -0.912D+00-0.686D+00 0.795D+00 0.598D+00-0.737D+00-0.260D+01
 Coeff:      0.316D+01 0.183D+00
 Gap=     0.077 Goal=   None    Shift=    0.000
 Gap=     0.237 Goal=   None    Shift=    0.000
 RMSDP=1.26D-04 MaxDP=1.67D-02 DE=-1.11D-03 OVMax= 2.81D-02

 Cycle  34  Pass 1  IDiag  1:
 RMSU=  4.76D-05    CP:  9.92D-01  6.57D-02  2.79D-01  9.09D-01  9.57D-01
                    CP:  6.77D-01 -8.02D-01  3.00D+00  1.51D+00  2.42D+00
                    CP:  3.00D+00  3.00D+00  1.22D+00
 E= -732.270961313574     Delta-E=       -0.000172032194 Rises=F Damp=F
 DIIS: error= 6.21D-03 at cycle  34 NSaved=  20.
 NSaved=20 IEnMin=14 EnMin= -732.272742622906     IErMin= 5 ErrMin= 4.26D-03
 ErrMax= 6.21D-03  0.00D+00 EMaxC= 1.00D-01 BMatC= 2.96D-02 BMatP= 9.19D-03
 IDIUse=3 WtCom= 9.56D-01 WtEn= 4.37D-02
 Coeff-Com: -0.656D+00 0.143D+00 0.979D+00-0.749D+00 0.549D+00 0.128D+00
 Coeff-Com:  0.113D-01 0.258D+00 0.320D+00-0.921D-01 0.178D+00-0.593D+00
 Coeff-Com: -0.578D+00 0.417D+00 0.941D+00-0.740D-01-0.511D+01 0.407D+01
 Coeff-Com:  0.809D+01-0.723D+01
 Coeff-En:   0.000D+00 0.000D+00 0.000D+00 0.000D+00 0.000D+00 0.000D+00
 Coeff-En:   0.000D+00 0.000D+00 0.000D+00 0.000D+00 0.000D+00 0.000D+00
 Coeff-En:   0.000D+00 0.000D+00 0.000D+00 0.000D+00 0.000D+00 0.000D+00
 Coeff-En:   0.000D+00 0.100D+01
 Coeff:     -0.627D+00 0.137D+00 0.936D+00-0.716D+00 0.525D+00 0.122D+00
 Coeff:      0.108D-01 0.247D+00 0.306D+00-0.881D-01 0.171D+00-0.567D+00
 Coeff:     -0.552D+00 0.398D+00 0.900D+00-0.708D-01-0.488D+01 0.389D+01
 Coeff:      0.774D+01-0.687D+01
 Gap=     0.082 Goal=   None    Shift=    0.000
 Gap=     0.253 Goal=   None    Shift=    0.000
 RMSDP=8.58D-04 MaxDP=9.28D-02 DE=-1.72D-04 OVMax= 1.27D-01

 Cycle  35  Pass 1  IDiag  1:
 RMSU=  2.51D-04    CP:  9.99D-01  1.45D-01  2.11D-01  8.83D-01  9.70D-01
                    CP:  5.10D-01 -9.15D-01  3.00D+00  1.38D+00  2.29D+00
                    CP:  3.00D+00  3.00D+00  5.30D-01 -2.80D+00
 E= -732.273444802579     Delta-E=       -0.002483489005 Rises=F Damp=F
 DIIS: error= 4.87D-03 at cycle  35 NSaved=  20.
 NSaved=20 IEnMin=20 EnMin= -732.273444802579     IErMin= 5 ErrMin= 4.26D-03
 ErrMax= 4.87D-03  0.00D+00 EMaxC= 1.00D-01 BMatC= 2.29D-02 BMatP= 9.19D-03
 IDIUse=3 WtCom= 9.56D-01 WtEn= 4.37D-02
 Coeff-Com: -0.782D+00 0.118D+00 0.120D+01-0.790D+00 0.458D+00-0.868D-01
 Coeff-Com:  0.290D+00 0.978D+00-0.209D+00-0.312D+00-0.387D+00-0.673D+00
 Coeff-Com:  0.338D+00 0.502D+00 0.736D+00-0.307D+01 0.134D+01 0.651D+01
 Coeff-Com: -0.643D+01 0.127D+01
 Coeff-En:   0.000D+00 0.000D+00 0.000D+00 0.000D+00 0.000D+00 0.000D+00
 Coeff-En:   0.000D+00 0.000D+00 0.000D+00 0.000D+00 0.000D+00 0.000D+00
 Coeff-En:   0.000D+00 0.000D+00 0.000D+00 0.000D+00 0.000D+00 0.000D+00
 Coeff-En:   0.000D+00 0.100D+01
 Coeff:     -0.748D+00 0.113D+00 0.115D+01-0.755D+00 0.438D+00-0.830D-01
 Coeff:      0.277D+00 0.936D+00-0.200D+00-0.298D+00-0.370D+00-0.643D+00
 Coeff:      0.323D+00 0.480D+00 0.704D+00-0.293D+01 0.128D+01 0.622D+01
 Coeff:     -0.614D+01 0.126D+01
 Gap=     0.089 Goal=   None    Shift=    0.000
 Gap=     0.252 Goal=   None    Shift=    0.000
 RMSDP=6.67D-04 MaxDP=7.87D-02 DE=-2.48D-03 OVMax= 1.26D-01

 Cycle  36  Pass 1  IDiag  1:
 RMSU=  2.62D-04    CP:  9.95D-01  1.04D-01  2.44D-01  9.45D-01  9.89D-01
                    CP:  2.92D-01 -1.34D+00  3.00D+00  1.43D+00  2.59D+00
                    CP:  3.00D+00  2.93D+00 -2.48D-01 -3.00D+00  1.60D+00
 E= -732.272375427076     Delta-E=        0.001069375502 Rises=F Damp=F
 DIIS: error= 5.22D-03 at cycle  36 NSaved=  20.
 NSaved=20 IEnMin=19 EnMin= -732.273444802579     IErMin=12 ErrMin= 4.37D-03
 ErrMax= 5.22D-03  0.00D+00 EMaxC= 1.00D-01 BMatC= 2.65D-02 BMatP= 9.19D-03
 IDIUse=3 WtCom= 9.56D-01 WtEn= 4.37D-02
 Rare condition: small coef for last iteration:  0.000D+00
 Coeff-Com: -0.439D+00-0.269D+00 0.105D+01-0.231D+00-0.619D-01 0.193D+00
 Coeff-Com:  0.118D+01-0.466D-01-0.414D+00-0.157D+00-0.917D+00 0.113D+00
 Coeff-Com:  0.643D+00 0.338D+01-0.439D+01-0.112D+01 0.236D+01-0.217D+01
 Coeff-Com:  0.149D+01 0.789D+00
 Coeff-En:   0.000D+00 0.000D+00 0.000D+00 0.000D+00 0.000D+00 0.000D+00
 Coeff-En:   0.000D+00 0.000D+00 0.000D+00 0.000D+00 0.000D+00 0.000D+00
 Coeff-En:   0.000D+00 0.000D+00 0.000D+00 0.000D+00 0.000D+00 0.000D+00
 Coeff-En:   0.000D+00 0.100D+01
 Coeff:     -0.439D+00-0.269D+00 0.105D+01-0.231D+00-0.619D-01 0.193D+00
 Coeff:      0.118D+01-0.466D-01-0.414D+00-0.157D+00-0.917D+00 0.113D+00
 Coeff:      0.643D+00 0.338D+01-0.439D+01-0.112D+01 0.236D+01-0.217D+01
 Coeff:      0.149D+01 0.789D+00
 Gap=     0.093 Goal=   None    Shift=    0.000
 Gap=     0.261 Goal=   None    Shift=    0.000
 RMSDP=5.78D-04 MaxDP=6.75D-02 DE= 1.07D-03 OVMax= 5.44D-02

 Cycle  37  Pass 1  IDiag  1:
 RMSU=  1.53D-04    CP:  9.99D-01  1.51D-01  2.08D-01  8.79D-01  8.57D-01
                    CP:  2.60D-01 -1.24D+00  3.00D+00  1.41D+00  3.00D+00
                    CP:  3.00D+00  3.00D+00 -3.75D-01 -3.00D+00  2.52D+00
                    CP:  1.52D+00
 E= -732.273840625495     Delta-E=       -0.001465198419 Rises=F Damp=F
 DIIS: error= 4.66D-03 at cycle  37 NSaved=  20.
 NSaved=20 IEnMin=20 EnMin= -732.273840625495     IErMin=11 ErrMin= 4.37D-03
 ErrMax= 4.66D-03  0.00D+00 EMaxC= 1.00D-01 BMatC= 2.27D-02 BMatP= 9.19D-03
 IDIUse=3 WtCom= 9.56D-01 WtEn= 4.37D-02
 Coeff-Com: -0.568D+00-0.224D+00 0.910D+00-0.681D-01 0.173D+00 0.100D+01
 Coeff-Com: -0.262D+00-0.416D+00-0.280D+00-0.645D+00 0.504D+00 0.459D+00
 Coeff-Com:  0.193D+01-0.310D+01-0.230D+00 0.310D+01-0.299D+01 0.124D+01
 Coeff-Com: -0.190D+00 0.659D+00
 Coeff-En:   0.000D+00 0.000D+00 0.000D+00 0.000D+00 0.000D+00 0.000D+00
 Coeff-En:   0.000D+00 0.000D+00 0.000D+00 0.000D+00 0.000D+00 0.000D+00
 Coeff-En:   0.000D+00 0.000D+00 0.000D+00 0.000D+00 0.000D+00 0.000D+00
 Coeff-En:   0.000D+00 0.100D+01
 Coeff:     -0.543D+00-0.214D+00 0.870D+00-0.651D-01 0.165D+00 0.960D+00
 Coeff:     -0.251D+00-0.398D+00-0.268D+00-0.617D+00 0.482D+00 0.439D+00
 Coeff:      0.184D+01-0.297D+01-0.220D+00 0.296D+01-0.286D+01 0.118D+01
 Coeff:     -0.182D+00 0.674D+00
 Gap=     0.099 Goal=   None    Shift=    0.000
 Gap=     0.259 Goal=   None    Shift=    0.000
 RMSDP=4.20D-04 MaxDP=5.41D-02 DE=-1.47D-03 OVMax= 9.56D-03

 Cycle  38  Pass 1  IDiag  1:
 RMSU=  8.82D-05    CP:  1.00D+00  2.00D-01  1.87D-01  8.88D-01  7.86D-01
                    CP:  3.10D-01 -1.30D+00  3.00D+00  1.35D+00  3.00D+00
                    CP:  3.00D+00  3.00D+00 -3.91D-01 -3.00D+00  2.65D+00
                    CP:  1.59D+00  9.71D-01
 E= -732.275207720966     Delta-E=       -0.001367095471 Rises=F Damp=F
 DIIS: error= 4.44D-03 at cycle  38 NSaved=  20.
 NSaved=20 IEnMin=20 EnMin= -732.275207720966     IErMin=10 ErrMin= 4.37D-03
 ErrMax= 4.44D-03  0.00D+00 EMaxC= 1.00D-01 BMatC= 1.85D-02 BMatP= 9.19D-03
 IDIUse=3 WtCom= 9.56D-01 WtEn= 4.37D-02
 Coeff-Com:  0.290D+00-0.275D+00-0.435D-01 0.107D+00 0.506D+00-0.428D+00
 Coeff-Com: -0.314D+00-0.571D-01-0.123D+00 0.408D+00 0.845D-01 0.133D+01
 Coeff-Com: -0.166D+01-0.452D+00 0.412D+01-0.378D+01 0.139D+01-0.240D+01
 Coeff-Com: -0.630D+00 0.293D+01
 Coeff-En:   0.000D+00 0.000D+00 0.000D+00 0.000D+00 0.000D+00 0.000D+00
 Coeff-En:   0.000D+00 0.000D+00 0.000D+00 0.000D+00 0.000D+00 0.000D+00
 Coeff-En:   0.000D+00 0.000D+00 0.000D+00 0.000D+00 0.000D+00 0.000D+00
 Coeff-En:   0.000D+00 0.100D+01
 Coeff:      0.278D+00-0.263D+00-0.416D-01 0.102D+00 0.484D+00-0.409D+00
 Coeff:     -0.300D+00-0.546D-01-0.118D+00 0.390D+00 0.808D-01 0.127D+01
 Coeff:     -0.159D+01-0.432D+00 0.394D+01-0.361D+01 0.133D+01-0.230D+01
 Coeff:     -0.603D+00 0.284D+01
 Gap=     0.122 Goal=   None    Shift=    0.000
 Gap=     0.267 Goal=   None    Shift=    0.000
 RMSDP=2.98D-03 MaxDP=4.61D-01 DE=-1.37D-03 OVMax= 4.88D-02

 Cycle  39  Pass 1  IDiag  1:
 RMSU=  4.79D-04    CP:  1.03D+00  5.19D-01  2.88D-02  6.74D-01  3.82D-01
                    CP:  6.45D-01 -1.03D+00  3.00D+00  1.05D+00  3.00D+00
                    CP:  3.00D+00  3.00D+00 -4.61D-03 -3.00D+00  3.00D+00
                    CP:  1.78D+00  1.27D+00  3.00D+00
 E= -732.280731591757     Delta-E=       -0.005523870791 Rises=F Damp=F
 DIIS: error= 1.82D-03 at cycle  39 NSaved=  20.
 NSaved=20 IEnMin=20 EnMin= -732.280731591757     IErMin=20 ErrMin= 1.82D-03
 ErrMax= 1.82D-03  0.00D+00 EMaxC= 1.00D-01 BMatC= 2.52D-03 BMatP= 9.19D-03
 IDIUse=3 WtCom= 9.82D-01 WtEn= 1.82D-02
 Coeff-Com: -0.176D-01-0.380D-01 0.788D-01 0.579D+00-0.179D+00-0.201D+00
 Coeff-Com:  0.106D+00-0.440D+00-0.173D-01 0.179D+00 0.120D+01-0.905D+00
 Coeff-Com: -0.756D+00 0.600D+00-0.553D+00 0.852D+00-0.546D+00-0.477D+00
 Coeff-Com:  0.700D+00 0.831D+00
 Coeff-En:   0.000D+00 0.000D+00 0.000D+00 0.000D+00 0.000D+00 0.000D+00
 Coeff-En:   0.000D+00 0.000D+00 0.000D+00 0.000D+00 0.000D+00 0.000D+00
 Coeff-En:   0.000D+00 0.000D+00 0.000D+00 0.000D+00 0.000D+00 0.000D+00
 Coeff-En:   0.000D+00 0.100D+01
 Coeff:     -0.173D-01-0.373D-01 0.773D-01 0.569D+00-0.176D+00-0.198D+00
 Coeff:      0.104D+00-0.432D+00-0.170D-01 0.176D+00 0.118D+01-0.888D+00
 Coeff:     -0.742D+00 0.589D+00-0.543D+00 0.836D+00-0.536D+00-0.468D+00
 Coeff:      0.687D+00 0.834D+00
 Gap=     0.124 Goal=   None    Shift=    0.000
 Gap=     0.262 Goal=   None    Shift=    0.000
 RMSDP=6.01D-04 MaxDP=1.11D-01 DE=-5.52D-03 OVMax= 2.12D-02

 Cycle  40  Pass 1  IDiag  1:
 RMSU=  1.31D-04    CP:  1.04D+00  5.74D-01  7.34D-03  6.07D-01  3.44D-01
                    CP:  7.99D-01 -9.87D-01  3.00D+00  1.07D+00  3.00D+00
                    CP:  3.00D+00  3.00D+00  1.65D-01 -3.00D+00  3.00D+00
                    CP:  1.57D+00  1.10D+00  3.00D+00  1.10D+00
 E= -732.281205001887     Delta-E=       -0.000473410130 Rises=F Damp=F
 DIIS: error= 1.10D-03 at cycle  40 NSaved=  20.
 NSaved=20 IEnMin=20 EnMin= -732.281205001887     IErMin=20 ErrMin= 1.10D-03
 ErrMax= 1.10D-03  0.00D+00 EMaxC= 1.00D-01 BMatC= 1.15D-03 BMatP= 2.52D-03
 IDIUse=3 WtCom= 9.89D-01 WtEn= 1.10D-02
 Coeff-Com: -0.213D-02 0.516D-04 0.121D-01-0.551D-01 0.835D-03 0.188D+00
 Coeff-Com: -0.178D-01-0.170D+00 0.140D-01 0.163D+00 0.431D+00-0.590D+00
 Coeff-Com: -0.113D+01 0.111D+01-0.143D+00 0.358D+00-0.184D+00-0.426D+00
 Coeff-Com:  0.409D+00 0.104D+01
 Coeff-En:   0.000D+00 0.000D+00 0.000D+00 0.000D+00 0.000D+00 0.000D+00
 Coeff-En:   0.000D+00 0.000D+00 0.000D+00 0.000D+00 0.000D+00 0.000D+00
 Coeff-En:   0.000D+00 0.000D+00 0.000D+00 0.000D+00 0.000D+00 0.000D+00
 Coeff-En:   0.000D+00 0.100D+01
 Coeff:     -0.211D-02 0.511D-04 0.119D-01-0.545D-01 0.826D-03 0.186D+00
 Coeff:     -0.176D-01-0.168D+00 0.138D-01 0.162D+00 0.426D+00-0.583D+00
 Coeff:     -0.112D+01 0.110D+01-0.141D+00 0.354D+00-0.182D+00-0.421D+00
 Coeff:      0.404D+00 0.103D+01
 Gap=     0.131 Goal=   None    Shift=    0.000
 Gap=     0.263 Goal=   None    Shift=    0.000
 RMSDP=1.16D-03 MaxDP=1.99D-01 DE=-4.73D-04 OVMax= 1.58D-02

 Cycle  41  Pass 1  IDiag  1:
 Restarting incremental Fock formation.
 E= -732.281591713842     Delta-E=       -0.000386711955 Rises=F Damp=F
 DIIS: error= 1.24D-04 at cycle  41 NSaved=  20.
 NSaved=20 IEnMin=20 EnMin= -732.281591713842     IErMin=20 ErrMin= 1.24D-04
 ErrMax= 1.24D-04  0.00D+00 EMaxC= 1.00D-01 BMatC= 1.13D-05 BMatP= 1.15D-03
 IDIUse=3 WtCom= 9.99D-01 WtEn= 1.24D-03
 Coeff-Com:  0.309D-02-0.293D-02-0.137D-01-0.128D-01 0.943D-03 0.114D-01
 Coeff-Com:  0.329D-01-0.147D-01-0.835D-02 0.314D+00-0.403D+00-0.694D+00
 Coeff-Com:  0.718D+00-0.108D+00 0.272D+00 0.466D-02-0.135D+00-0.495D-01
 Coeff-Com:  0.145D+00 0.942D+00
 Coeff-En:   0.000D+00 0.000D+00 0.000D+00 0.000D+00 0.000D+00 0.000D+00
 Coeff-En:   0.000D+00 0.000D+00 0.000D+00 0.000D+00 0.000D+00 0.000D+00
 Coeff-En:   0.000D+00 0.000D+00 0.000D+00 0.000D+00 0.000D+00 0.000D+00
 Coeff-En:   0.000D+00 0.100D+01
 Coeff:      0.309D-02-0.293D-02-0.137D-01-0.128D-01 0.942D-03 0.114D-01
 Coeff:      0.329D-01-0.147D-01-0.834D-02 0.313D+00-0.403D+00-0.693D+00
 Coeff:      0.717D+00-0.108D+00 0.271D+00 0.465D-02-0.135D+00-0.495D-01
 Coeff:      0.145D+00 0.942D+00
 Gap=     0.131 Goal=   None    Shift=    0.000
 Gap=     0.263 Goal=   None    Shift=    0.000
 RMSDP=8.25D-05 MaxDP=1.05D-02 DE=-3.87D-04 OVMax= 4.68D-03

 Cycle  42  Pass 1  IDiag  1:
 RMSU=  7.99D-05    CP:  1.00D+00
 E= -732.281612330717     Delta-E=       -0.000020616875 Rises=F Damp=F
 DIIS: error= 1.16D-04 at cycle  42 NSaved=  20.
 NSaved=20 IEnMin=20 EnMin= -732.281612330717     IErMin=20 ErrMin= 1.16D-04
 ErrMax= 1.16D-04  0.00D+00 EMaxC= 1.00D-01 BMatC= 8.90D-06 BMatP= 1.13D-05
 IDIUse=3 WtCom= 9.99D-01 WtEn= 1.16D-03
 Coeff-Com: -0.382D-02-0.198D-01-0.136D-01 0.494D-02 0.121D-01 0.317D-01
 Coeff-Com: -0.125D-01 0.341D-01 0.214D+00-0.360D+00-0.340D+00 0.388D+00
 Coeff-Com: -0.432D-01 0.169D+00-0.202D-01-0.420D-01-0.501D-01 0.683D-01
 Coeff-Com:  0.442D+00 0.542D+00
 Coeff-En:   0.000D+00 0.000D+00 0.000D+00 0.000D+00 0.000D+00 0.000D+00
 Coeff-En:   0.000D+00 0.000D+00 0.000D+00 0.000D+00 0.000D+00 0.000D+00
 Coeff-En:   0.000D+00 0.000D+00 0.000D+00 0.000D+00 0.000D+00 0.000D+00
 Coeff-En:   0.000D+00 0.100D+01
 Coeff:     -0.381D-02-0.198D-01-0.136D-01 0.494D-02 0.121D-01 0.317D-01
 Coeff:     -0.125D-01 0.340D-01 0.214D+00-0.360D+00-0.340D+00 0.387D+00
 Coeff:     -0.432D-01 0.169D+00-0.202D-01-0.419D-01-0.501D-01 0.682D-01
 Coeff:      0.441D+00 0.543D+00
 Gap=     0.131 Goal=   None    Shift=    0.000
 Gap=     0.263 Goal=   None    Shift=    0.000
 RMSDP=3.46D-05 MaxDP=2.10D-03 DE=-2.06D-05 OVMax= 2.41D-03

 Cycle  43  Pass 1  IDiag  1:
 RMSU=  2.41D-05    CP:  1.00D+00  1.30D+00
 E= -732.281622000371     Delta-E=       -0.000009669654 Rises=F Damp=F
 DIIS: error= 1.17D-04 at cycle  43 NSaved=  20.
 NSaved=20 IEnMin=20 EnMin= -732.281622000371     IErMin=19 ErrMin= 1.16D-04
 ErrMax= 1.17D-04  0.00D+00 EMaxC= 1.00D-01 BMatC= 7.68D-06 BMatP= 8.90D-06
 IDIUse=3 WtCom= 9.99D-01 WtEn= 1.16D-03
 Coeff-Com:  0.149D-04-0.603D-02 0.234D-01-0.794D-02-0.128D-01 0.475D-02
 Coeff-Com:  0.892D-01 0.951D-01-0.306D+00-0.231D+00 0.293D+00-0.134D-02
 Coeff-Com:  0.927D-01-0.645D-01 0.214D-01-0.123D-01 0.842D-01 0.119D-02
 Coeff-Com: -0.169D+00 0.111D+01
 Coeff-En:   0.000D+00 0.000D+00 0.000D+00 0.000D+00 0.000D+00 0.000D+00
 Coeff-En:   0.000D+00 0.000D+00 0.000D+00 0.000D+00 0.000D+00 0.000D+00
 Coeff-En:   0.000D+00 0.000D+00 0.000D+00 0.000D+00 0.000D+00 0.000D+00
 Coeff-En:   0.000D+00 0.100D+01
 Coeff:      0.149D-04-0.602D-02 0.234D-01-0.793D-02-0.128D-01 0.474D-02
 Coeff:      0.891D-01 0.950D-01-0.306D+00-0.231D+00 0.293D+00-0.134D-02
 Coeff:      0.926D-01-0.644D-01 0.214D-01-0.122D-01 0.841D-01 0.119D-02
 Coeff:     -0.169D+00 0.111D+01
 Gap=     0.131 Goal=   None    Shift=    0.000
 Gap=     0.263 Goal=   None    Shift=    0.000
 RMSDP=6.16D-05 MaxDP=4.21D-03 DE=-9.67D-06 OVMax= 4.37D-03

 Cycle  44  Pass 1  IDiag  1:
 RMSU=  2.61D-05    CP:  1.00D+00  1.71D+00  2.72D+00
 E= -732.281636590318     Delta-E=       -0.000014589947 Rises=F Damp=F
 DIIS: error= 1.19D-04 at cycle  44 NSaved=  20.
 NSaved=20 IEnMin=20 EnMin= -732.281636590318     IErMin=18 ErrMin= 1.16D-04
 ErrMax= 1.19D-04  0.00D+00 EMaxC= 1.00D-01 BMatC= 8.19D-06 BMatP= 7.68D-06
 IDIUse=3 WtCom= 9.99D-01 WtEn= 1.16D-03
 Coeff-Com: -0.652D-03-0.115D-01 0.184D-01-0.311D-02-0.115D-01-0.170D-02
 Coeff-Com:  0.151D+00-0.234D+00-0.172D+00 0.227D+00-0.475D-02 0.648D-01
 Coeff-Com: -0.491D-01 0.190D-01-0.158D-01 0.885D-01 0.738D-01-0.927D-01
 Coeff-Com:  0.106D+01-0.999D-01
 Coeff-En:   0.000D+00 0.000D+00 0.000D+00 0.000D+00 0.000D+00 0.000D+00
 Coeff-En:   0.000D+00 0.000D+00 0.000D+00 0.000D+00 0.000D+00 0.000D+00
 Coeff-En:   0.000D+00 0.000D+00 0.000D+00 0.000D+00 0.000D+00 0.000D+00
 Coeff-En:   0.000D+00 0.100D+01
 Coeff:     -0.652D-03-0.115D-01 0.184D-01-0.311D-02-0.115D-01-0.170D-02
 Coeff:      0.151D+00-0.234D+00-0.172D+00 0.226D+00-0.474D-02 0.647D-01
 Coeff:     -0.491D-01 0.190D-01-0.158D-01 0.884D-01 0.737D-01-0.926D-01
 Coeff:      0.105D+01-0.987D-01
 Gap=     0.131 Goal=   None    Shift=    0.000
 Gap=     0.263 Goal=   None    Shift=    0.000
 RMSDP=1.86D-05 MaxDP=1.59D-03 DE=-1.46D-05 OVMax= 1.62D-03

 Cycle  45  Pass 1  IDiag  1:
 RMSU=  1.19D-05    CP:  1.00D+00  1.63D+00  2.34D+00  9.52D-01
 E= -732.281631506031     Delta-E=        0.000005084287 Rises=F Damp=F
 DIIS: error= 1.17D-04 at cycle  45 NSaved=  20.
 NSaved=20 IEnMin=19 EnMin= -732.281636590318     IErMin=17 ErrMin= 1.16D-04
 ErrMax= 1.17D-04  0.00D+00 EMaxC= 1.00D-01 BMatC= 7.42D-06 BMatP= 7.68D-06
 IDIUse=3 WtCom= 9.99D-01 WtEn= 1.16D-03
 Rare condition: small coef for last iteration:  0.000D+00
 Coeff-Com: -0.255D-01 0.681D-02 0.207D-01-0.123D-01 0.242D-01 0.112D+00
 Coeff-Com: -0.193D+00-0.217D+00 0.249D+00 0.167D-01 0.487D-02-0.264D-01
 Coeff-Com:  0.582D-01-0.571D-01-0.754D-02 0.521D-01-0.119D+00 0.119D+01
 Coeff-Com: -0.482D+01 0.475D+01
 Coeff-En:   0.000D+00 0.000D+00 0.000D+00 0.000D+00 0.000D+00 0.000D+00
 Coeff-En:   0.000D+00 0.000D+00 0.000D+00 0.000D+00 0.000D+00 0.000D+00
 Coeff-En:   0.000D+00 0.000D+00 0.000D+00 0.000D+00 0.000D+00 0.000D+00
 Coeff-En:   0.000D+00 0.100D+01
 Coeff:     -0.255D-01 0.681D-02 0.207D-01-0.123D-01 0.242D-01 0.112D+00
 Coeff:     -0.193D+00-0.217D+00 0.249D+00 0.167D-01 0.487D-02-0.264D-01
 Coeff:      0.582D-01-0.571D-01-0.754D-02 0.521D-01-0.119D+00 0.119D+01
 Coeff:     -0.482D+01 0.475D+01
 Gap=     0.132 Goal=   None    Shift=    0.000
 Gap=     0.263 Goal=   None    Shift=    0.000
 RMSDP=5.29D-05 MaxDP=5.68D-03 DE= 5.08D-06 OVMax= 6.39D-03

 Cycle  46  Pass 1  IDiag  1:
 RMSU=  3.17D-05    CP:  1.00D+00  1.21D+00  2.16D+00  1.37D+00  2.17D+00
 E= -732.281610583850     Delta-E=        0.000020922180 Rises=F Damp=F
 DIIS: error= 1.21D-04 at cycle  46 NSaved=  20.
 NSaved=20 IEnMin=18 EnMin= -732.281636590318     IErMin=16 ErrMin= 1.16D-04
 ErrMax= 1.21D-04  0.00D+00 EMaxC= 1.00D-01 BMatC= 8.61D-06 BMatP= 7.42D-06
 IDIUse=3 WtCom= 9.99D-01 WtEn= 1.16D-03
 Rare condition: small coef for last iteration:  0.000D+00
 Coeff-Com: -0.135D-01 0.198D-01-0.825D-03 0.103D-01 0.539D-01-0.151D+00
 Coeff-Com: -0.179D+00 0.217D+00 0.735D-02 0.376D-01-0.260D-01 0.488D-01
 Coeff-Com: -0.692D-01-0.118D-01 0.171D+00-0.168D+00 0.889D+00-0.381D+01
 Coeff-Com:  0.386D+01 0.109D+00
 Coeff-En:   0.000D+00 0.000D+00 0.000D+00 0.000D+00 0.000D+00 0.000D+00
 Coeff-En:   0.000D+00 0.000D+00 0.000D+00 0.000D+00 0.000D+00 0.000D+00
 Coeff-En:   0.000D+00 0.000D+00 0.000D+00 0.000D+00 0.000D+00 0.000D+00
 Coeff-En:   0.000D+00 0.100D+01
 Coeff:     -0.135D-01 0.198D-01-0.825D-03 0.103D-01 0.539D-01-0.151D+00
 Coeff:     -0.179D+00 0.217D+00 0.735D-02 0.376D-01-0.260D-01 0.488D-01
 Coeff:     -0.692D-01-0.118D-01 0.171D+00-0.168D+00 0.889D+00-0.381D+01
 Coeff:      0.386D+01 0.109D+00
 Gap=     0.131 Goal=   None    Shift=    0.000
 Gap=     0.263 Goal=   None    Shift=    0.000
 RMSDP=2.78D-05 MaxDP=4.00D-03 DE= 2.09D-05 OVMax= 1.23D-03

 Cycle  47  Pass 1  IDiag  1:
 RMSU=  8.24D-06    CP:  1.00D+00  1.42D+00  2.13D+00  1.49D+00  3.00D+00
                    CP:  7.57D-01
 E= -732.281614387362     Delta-E=       -0.000003803511 Rises=F Damp=F
 DIIS: error= 1.20D-04 at cycle  47 NSaved=  20.
 NSaved=20 IEnMin=17 EnMin= -732.281636590318     IErMin=15 ErrMin= 1.16D-04
 ErrMax= 1.20D-04  0.00D+00 EMaxC= 1.00D-01 BMatC= 7.66D-06 BMatP= 7.42D-06
 IDIUse=3 WtCom= 9.99D-01 WtEn= 1.16D-03
 Coeff-Com: -0.176D-01 0.243D-01-0.664D-02 0.636D-01-0.126D+00-0.314D+00
 Coeff-Com:  0.332D+00 0.781D-02 0.304D-01-0.101D-01 0.466D-01-0.678D-01
 Coeff-Com: -0.907D-02-0.324D-01-0.347D-01 0.115D+01-0.540D+01 0.613D+01
 Coeff-Com:  0.205D+01-0.281D+01
 Coeff-En:   0.000D+00 0.000D+00 0.000D+00 0.000D+00 0.000D+00 0.000D+00
 Coeff-En:   0.000D+00 0.000D+00 0.000D+00 0.000D+00 0.000D+00 0.000D+00
 Coeff-En:   0.000D+00 0.000D+00 0.000D+00 0.000D+00 0.000D+00 0.000D+00
 Coeff-En:   0.000D+00 0.100D+01
 Coeff:     -0.176D-01 0.243D-01-0.663D-02 0.636D-01-0.126D+00-0.313D+00
 Coeff:      0.331D+00 0.780D-02 0.304D-01-0.101D-01 0.465D-01-0.678D-01
 Coeff:     -0.906D-02-0.324D-01-0.347D-01 0.114D+01-0.539D+01 0.613D+01
 Coeff:      0.205D+01-0.281D+01
 Gap=     0.131 Goal=   None    Shift=    0.000
 Gap=     0.263 Goal=   None    Shift=    0.000
 RMSDP=3.79D-05 MaxDP=4.04D-03 DE=-3.80D-06 OVMax= 4.44D-03

 Cycle  48  Pass 1  IDiag  1:
 RMSU=  1.07D-05    CP:  1.00D+00  1.27D+00  1.61D+00  6.22D-01  1.89D+00
                    CP:  3.02D-01 -1.26D-01
 E= -732.281615834616     Delta-E=       -0.000001447254 Rises=F Damp=F
 DIIS: error= 1.19D-04 at cycle  48 NSaved=  20.
 NSaved=20 IEnMin=16 EnMin= -732.281636590318     IErMin=14 ErrMin= 1.16D-04
 ErrMax= 1.19D-04  0.00D+00 EMaxC= 1.00D-01 BMatC= 7.55D-06 BMatP= 7.42D-06
 IDIUse=3 WtCom= 9.99D-01 WtEn= 1.16D-03
 Coeff-Com: -0.296D-01 0.385D-01-0.102D-01-0.403D-01-0.196D+00 0.211D+00
 Coeff-Com:  0.745D-02-0.178D-01 0.242D-01 0.659D-01-0.881D-01-0.598D-01
 Coeff-Com: -0.183D+00 0.214D+00 0.987D+00-0.641D+01 0.752D+01 0.211D+01
 Coeff-Com: -0.780D+01 0.465D+01
 Coeff-En:   0.000D+00 0.000D+00 0.000D+00 0.000D+00 0.000D+00 0.000D+00
 Coeff-En:   0.000D+00 0.000D+00 0.000D+00 0.000D+00 0.000D+00 0.000D+00
 Coeff-En:   0.000D+00 0.000D+00 0.000D+00 0.000D+00 0.000D+00 0.000D+00
 Coeff-En:   0.000D+00 0.100D+01
 Coeff:     -0.296D-01 0.385D-01-0.102D-01-0.402D-01-0.196D+00 0.211D+00
 Coeff:      0.745D-02-0.178D-01 0.242D-01 0.658D-01-0.880D-01-0.597D-01
 Coeff:     -0.182D+00 0.214D+00 0.986D+00-0.640D+01 0.751D+01 0.211D+01
 Coeff:     -0.779D+01 0.465D+01
 Gap=     0.131 Goal=   None    Shift=    0.000
 Gap=     0.263 Goal=   None    Shift=    0.000
 RMSDP=1.70D-04 MaxDP=1.98D-02 DE=-1.45D-06 OVMax= 2.22D-02

 Cycle  49  Pass 1  IDiag  1:
 RMSU=  4.39D-05    CP:  1.00D+00  7.19D-01  7.25D-03 -3.00D+00 -3.00D+00
                    CP: -1.86D+00 -3.00D+00  3.00D+00
 E= -732.281626099930     Delta-E=       -0.000010265314 Rises=F Damp=F
 DIIS: error= 1.12D-04 at cycle  49 NSaved=  20.
 NSaved=20 IEnMin=15 EnMin= -732.281636590318     IErMin=20 ErrMin= 1.12D-04
 ErrMax= 1.12D-04  0.00D+00 EMaxC= 1.00D-01 BMatC= 6.89D-06 BMatP= 7.42D-06
 IDIUse=3 WtCom= 9.99D-01 WtEn= 1.12D-03
 Coeff-Com: -0.303D-01 0.452D-01-0.210D-01-0.322D+00 0.342D+00-0.879D-01
 Coeff-Com:  0.441D-01 0.934D-01-0.446D-01-0.844D-01-0.257D-01 0.343D+00
 Coeff-Com: -0.156D+00-0.970D+00 0.759D+00 0.100D+00-0.356D+01-0.807D+01
 Coeff-Com:  0.915D+01 0.349D+01
 Coeff-En:   0.000D+00 0.000D+00 0.000D+00 0.000D+00 0.000D+00 0.000D+00
 Coeff-En:   0.000D+00 0.000D+00 0.000D+00 0.000D+00 0.000D+00 0.000D+00
 Coeff-En:   0.000D+00 0.000D+00 0.000D+00 0.000D+00 0.000D+00 0.000D+00
 Coeff-En:   0.000D+00 0.100D+01
 Coeff:     -0.303D-01 0.451D-01-0.210D-01-0.322D+00 0.342D+00-0.878D-01
 Coeff:      0.440D-01 0.933D-01-0.445D-01-0.843D-01-0.257D-01 0.342D+00
 Coeff:     -0.156D+00-0.969D+00 0.758D+00 0.100D+00-0.355D+01-0.806D+01
 Coeff:      0.914D+01 0.349D+01
 Gap=     0.131 Goal=   None    Shift=    0.000
 Gap=     0.263 Goal=   None    Shift=    0.000
 RMSDP=7.46D-04 MaxDP=8.51D-02 DE=-1.03D-05 OVMax= 1.02D-01

 Cycle  50  Pass 1  IDiag  1:
 RMSU=  6.46D-04    CP:  9.99D-01 -1.42D+00 -3.00D+00 -3.00D+00 -3.00D+00
                    CP: -3.00D+00 -3.00D+00  3.00D+00  3.00D+00
 E= -732.281676985016     Delta-E=       -0.000050885085 Rises=F Damp=F
 DIIS: error= 9.75D-05 at cycle  50 NSaved=  20.
 NSaved=20 IEnMin=20 EnMin= -732.281676985016     IErMin=20 ErrMin= 9.75D-05
 ErrMax= 9.75D-05  0.00D+00 EMaxC= 1.00D-01 BMatC= 7.31D-06 BMatP= 6.89D-06
 IDIUse=1 WtCom= 1.00D+00 WtEn= 0.00D+00
 Coeff-Com:  0.495D-02-0.362D-01-0.414D-01 0.101D+00-0.657D-01 0.328D-02
 Coeff-Com:  0.307D-01 0.175D-01-0.491D-01-0.275D-02 0.235D+00 0.584D-01
 Coeff-Com: -0.313D+00 0.258D+01-0.246D+01-0.328D+01-0.492D+01 0.622D+01
 Coeff-Com:  0.259D+01 0.328D+00
 Coeff:      0.495D-02-0.362D-01-0.414D-01 0.101D+00-0.657D-01 0.328D-02
 Coeff:      0.307D-01 0.175D-01-0.491D-01-0.275D-02 0.235D+00 0.584D-01
 Coeff:     -0.313D+00 0.258D+01-0.246D+01-0.328D+01-0.492D+01 0.622D+01
 Coeff:      0.259D+01 0.328D+00
 Gap=     0.132 Goal=   None    Shift=    0.000
 Gap=     0.263 Goal=   None    Shift=    0.000
 RMSDP=6.35D-05 MaxDP=6.65D-03 DE=-5.09D-05 OVMax= 8.82D-03

 Cycle  51  Pass 1  IDiag  1:
 RMSU=  2.26D-05    CP:  9.99D-01 -1.43D+00 -3.00D+00 -3.00D+00 -3.00D+00
                    CP: -3.00D+00 -3.00D+00  3.00D+00  3.00D+00  1.09D+00
 E= -732.281684804319     Delta-E=       -0.000007819303 Rises=F Damp=F
 DIIS: error= 8.61D-05 at cycle  51 NSaved=  20.
 NSaved=20 IEnMin=20 EnMin= -732.281684804319     IErMin=20 ErrMin= 8.61D-05
 ErrMax= 8.61D-05  0.00D+00 EMaxC= 1.00D-01 BMatC= 6.37D-06 BMatP= 6.89D-06
 IDIUse=1 WtCom= 1.00D+00 WtEn= 0.00D+00
 Coeff-Com:  0.111D-02-0.406D+00 0.390D+00-0.157D-01 0.223D-01 0.743D-01
 Coeff-Com: -0.386D-01-0.647D-01-0.906D-01 0.148D+00 0.900D+00 0.103D+01
 Coeff-Com: -0.302D+01-0.410D+00-0.695D+00-0.106D+01 0.275D+01 0.281D+00
 Coeff-Com: -0.562D+01 0.682D+01
 Coeff:      0.111D-02-0.406D+00 0.390D+00-0.157D-01 0.223D-01 0.743D-01
 Coeff:     -0.386D-01-0.647D-01-0.906D-01 0.148D+00 0.900D+00 0.103D+01
 Coeff:     -0.302D+01-0.410D+00-0.695D+00-0.106D+01 0.275D+01 0.281D+00
 Coeff:     -0.562D+01 0.682D+01
 Gap=     0.131 Goal=   None    Shift=    0.000
 Gap=     0.263 Goal=   None    Shift=    0.000
 RMSDP=6.43D-04 MaxDP=6.85D-02 DE=-7.82D-06 OVMax= 9.25D-02

 Cycle  52  Pass 1  IDiag  1:
 RMSU=  1.92D-04    CP:  9.98D-01 -3.00D+00 -3.00D+00 -3.00D+00 -3.00D+00
                    CP: -3.00D+00 -3.00D+00  3.00D+00  3.00D+00  1.98D+00
                    CP:  3.00D+00
 E= -732.281688719680     Delta-E=       -0.000003915361 Rises=F Damp=F
 DIIS: error= 1.25D-04 at cycle  52 NSaved=  20.
 NSaved=20 IEnMin=20 EnMin= -732.281688719680     IErMin=19 ErrMin= 8.61D-05
 ErrMax= 1.25D-04  0.00D+00 EMaxC= 1.00D-01 BMatC= 7.99D-06 BMatP= 6.37D-06
 IDIUse=1 WtCom= 1.00D+00 WtEn= 0.00D+00
 Coeff-Com: -0.862D-03-0.108D-02 0.274D-01-0.573D-01 0.499D-01-0.256D-02
 Coeff-Com: -0.469D-01-0.660D-01-0.215D+00 0.479D+00 0.153D+01-0.375D+01
 Coeff-Com:  0.848D+00-0.540D+00-0.168D+01 0.354D+01-0.649D-01-0.682D+01
 Coeff-Com:  0.701D+01 0.760D+00
 Coeff:     -0.862D-03-0.108D-02 0.274D-01-0.573D-01 0.499D-01-0.256D-02
 Coeff:     -0.469D-01-0.660D-01-0.215D+00 0.479D+00 0.153D+01-0.375D+01
 Coeff:      0.848D+00-0.540D+00-0.168D+01 0.354D+01-0.649D-01-0.682D+01
 Coeff:      0.701D+01 0.760D+00
 Gap=     0.132 Goal=   None    Shift=    0.000
 Gap=     0.262 Goal=   None    Shift=    0.000
 RMSDP=2.73D-04 MaxDP=2.63D-02 DE=-3.92D-06 OVMax= 4.06D-02

 Cycle  53  Pass 1  IDiag  1:
 RMSU=  5.76D-05    CP:  9.97D-01 -3.00D+00 -3.00D+00 -3.00D+00 -3.00D+00
                    CP: -3.00D+00 -3.00D+00  3.00D+00  3.00D+00  2.35D+00
                    CP:  3.00D+00  1.62D+00
 E= -732.281695964192     Delta-E=       -0.000007244513 Rises=F Damp=F
 DIIS: error= 1.33D-04 at cycle  53 NSaved=  20.
 NSaved=20 IEnMin=20 EnMin= -732.281695964192     IErMin=18 ErrMin= 8.61D-05
 ErrMax= 1.33D-04  0.00D+00 EMaxC= 1.00D-01 BMatC= 5.55D-06 BMatP= 6.37D-06
 IDIUse=1 WtCom= 1.00D+00 WtEn= 0.00D+00
 Coeff-Com: -0.178D-02 0.198D-02 0.276D-01 0.586D-01-0.118D+00-0.209D-02
 Coeff-Com:  0.278D-01-0.122D+00-0.149D+00 0.639D+00-0.312D+01 0.207D+01
 Coeff-Com: -0.714D-01-0.411D+01 0.406D+01 0.133D+01-0.355D+01 0.300D+01
 Coeff-Com: -0.556D+00 0.159D+01
 Coeff:     -0.178D-02 0.198D-02 0.276D-01 0.586D-01-0.118D+00-0.209D-02
 Coeff:      0.278D-01-0.122D+00-0.149D+00 0.639D+00-0.312D+01 0.207D+01
 Coeff:     -0.714D-01-0.411D+01 0.406D+01 0.133D+01-0.355D+01 0.300D+01
 Coeff:     -0.556D+00 0.159D+01
 Gap=     0.131 Goal=   None    Shift=    0.000
 Gap=     0.262 Goal=   None    Shift=    0.000
 RMSDP=2.35D-04 MaxDP=1.91D-02 DE=-7.24D-06 OVMax= 3.15D-02

 Cycle  54  Pass 1  IDiag  1:
 RMSU=  3.12D-05    CP:  9.97D-01 -3.00D+00 -3.00D+00 -3.00D+00 -3.00D+00
                    CP: -3.00D+00 -3.00D+00  3.00D+00  3.00D+00  2.62D+00
                    CP:  3.00D+00  2.34D+00  1.97D+00
 E= -732.281695878658     Delta-E=        0.000000085534 Rises=F Damp=F
 DIIS: error= 6.84D-05 at cycle  54 NSaved=  20.
 NSaved=20 IEnMin=19 EnMin= -732.281695964192     IErMin=20 ErrMin= 6.84D-05
 ErrMax= 6.84D-05  0.00D+00 EMaxC= 1.00D-01 BMatC= 2.57D-06 BMatP= 5.55D-06
 IDIUse=1 WtCom= 1.00D+00 WtEn= 0.00D+00
 Coeff-Com: -0.142D-02 0.305D-02 0.122D-01-0.105D-01 0.538D-02-0.194D-01
 Coeff-Com:  0.105D+00-0.104D+00-0.310D+00-0.702D+00-0.192D-02 0.978D+00
 Coeff-Com: -0.739D+00-0.296D+00 0.991D+00 0.174D+01-0.150D+01-0.160D+01
 Coeff-Com:  0.270D+00 0.219D+01
 Coeff:     -0.142D-02 0.305D-02 0.122D-01-0.105D-01 0.538D-02-0.194D-01
 Coeff:      0.105D+00-0.104D+00-0.310D+00-0.702D+00-0.192D-02 0.978D+00
 Coeff:     -0.739D+00-0.296D+00 0.991D+00 0.174D+01-0.150D+01-0.160D+01
 Coeff:      0.270D+00 0.219D+01
 Gap=     0.132 Goal=   None    Shift=    0.000
 Gap=     0.262 Goal=   None    Shift=    0.000
 RMSDP=5.95D-04 MaxDP=5.97D-02 DE= 8.55D-08 OVMax= 8.85D-02

 Cycle  55  Pass 1  IDiag  1:
 RMSU=  3.20D-04    CP:  9.96D-01 -3.00D+00 -3.00D+00 -3.00D+00 -3.00D+00
                    CP: -3.00D+00 -3.00D+00  3.00D+00  3.00D+00  3.00D+00
                    CP:  3.00D+00  3.00D+00  3.00D+00  2.82D-01
 E= -732.281679573584     Delta-E=        0.000016305073 Rises=F Damp=F
 DIIS: error= 2.28D-04 at cycle  55 NSaved=  20.
 NSaved=20 IEnMin=18 EnMin= -732.281695964192     IErMin=19 ErrMin= 6.84D-05
 ErrMax= 2.28D-04  0.00D+00 EMaxC= 1.00D-01 BMatC= 1.15D-05 BMatP= 2.57D-06
 IDIUse=1 WtCom= 1.00D+00 WtEn= 0.00D+00
 Coeff-Com: -0.459D-03 0.162D-01-0.754D-02 0.163D-02-0.254D-01 0.166D+00
 Coeff-Com: -0.449D-01-0.475D+00 0.248D-01-0.726D+00 0.681D+00-0.368D+00
 Coeff-Com: -0.353D+00 0.101D+01 0.203D+01-0.168D+01-0.163D+01 0.463D-01
 Coeff-Com:  0.226D+01 0.842D-01
 Coeff:     -0.459D-03 0.162D-01-0.754D-02 0.163D-02-0.254D-01 0.166D+00
 Coeff:     -0.449D-01-0.475D+00 0.248D-01-0.726D+00 0.681D+00-0.368D+00
 Coeff:     -0.353D+00 0.101D+01 0.203D+01-0.168D+01-0.163D+01 0.463D-01
 Coeff:      0.226D+01 0.842D-01
 Gap=     0.132 Goal=   None    Shift=    0.000
 Gap=     0.262 Goal=   None    Shift=    0.000
 RMSDP=2.08D-05 MaxDP=2.38D-03 DE= 1.63D-05 OVMax= 7.14D-04

 Cycle  56  Pass 1  IDiag  1:
 RMSU=  1.69D-05    CP:  9.96D-01 -3.00D+00 -3.00D+00 -3.00D+00 -3.00D+00
                    CP: -3.00D+00 -3.00D+00  3.00D+00  3.00D+00  3.00D+00
                    CP:  3.00D+00  3.00D+00  3.00D+00  5.86D-01  1.01D+00
 E= -732.281680384945     Delta-E=       -0.000000811361 Rises=F Damp=F
 DIIS: error= 2.04D-04 at cycle  56 NSaved=  20.
 NSaved=20 IEnMin=17 EnMin= -732.281695964192     IErMin=18 ErrMin= 6.84D-05
 ErrMax= 2.04D-04  0.00D+00 EMaxC= 1.00D-01 BMatC= 9.24D-06 BMatP= 2.57D-06
 IDIUse=1 WtCom= 1.00D+00 WtEn= 0.00D+00
 Coeff-Com:  0.170D-01-0.118D-01-0.740D-03-0.144D-01 0.308D+00 0.442D+00
 Coeff-Com: -0.987D-01 0.269D-01-0.154D+01 0.905D+00 0.306D+01-0.332D+01
 Coeff-Com: -0.173D+00 0.205D+01-0.116D+01-0.110D+01-0.584D+00 0.139D+01
 Coeff-Com: -0.464D+01 0.544D+01
 Coeff:      0.170D-01-0.118D-01-0.740D-03-0.144D-01 0.308D+00 0.442D+00
 Coeff:     -0.987D-01 0.269D-01-0.154D+01 0.905D+00 0.306D+01-0.332D+01
 Coeff:     -0.173D+00 0.205D+01-0.116D+01-0.110D+01-0.584D+00 0.139D+01
 Coeff:     -0.464D+01 0.544D+01
 Gap=     0.131 Goal=   None    Shift=    0.000
 Gap=     0.262 Goal=   None    Shift=    0.000
 RMSDP=1.81D-04 MaxDP=1.35D-02 DE=-8.11D-07 OVMax= 1.79D-02

 Cycle  57  Pass 1  IDiag  1:
 RMSU=  8.93D-05    CP:  9.95D-01 -3.00D+00 -3.00D+00 -3.00D+00 -3.00D+00
                    CP: -3.00D+00 -3.00D+00  3.00D+00  3.00D+00  3.00D+00
                    CP:  3.00D+00  3.00D+00  3.00D+00  2.52D+00  1.36D+00
                    CP:  3.00D+00
 E= -732.281679275009     Delta-E=        0.000001109936 Rises=F Damp=F
 DIIS: error= 6.34D-05 at cycle  57 NSaved=  20.
 NSaved=20 IEnMin=16 EnMin= -732.281695964192     IErMin=20 ErrMin= 6.34D-05
 ErrMax= 6.34D-05  0.00D+00 EMaxC= 1.00D-01 BMatC= 1.59D-06 BMatP= 2.57D-06
 IDIUse=1 WtCom= 1.00D+00 WtEn= 0.00D+00
 Coeff-Com:  0.413D-02-0.573D-02-0.398D-02-0.913D-01 0.254D+00 0.101D+01
 Coeff-Com: -0.159D+01 0.239D+00 0.163D+01 0.158D+01-0.244D+01-0.948D+00
 Coeff-Com:  0.304D+00 0.409D+00-0.352D+00-0.364D+00 0.168D+00-0.348D+01
 Coeff-Com:  0.374D+01 0.939D+00
 Coeff:      0.413D-02-0.573D-02-0.398D-02-0.913D-01 0.254D+00 0.101D+01
 Coeff:     -0.159D+01 0.239D+00 0.163D+01 0.158D+01-0.244D+01-0.948D+00
 Coeff:      0.304D+00 0.409D+00-0.352D+00-0.364D+00 0.168D+00-0.348D+01
 Coeff:      0.374D+01 0.939D+00
 Gap=     0.131 Goal=   None    Shift=    0.000
 Gap=     0.262 Goal=   None    Shift=    0.000
 RMSDP=1.40D-04 MaxDP=1.34D-02 DE= 1.11D-06 OVMax= 1.74D-02

 Cycle  58  Pass 1  IDiag  1:
 RMSU=  2.65D-05    CP:  9.95D-01 -3.00D+00 -3.00D+00 -3.00D+00 -3.00D+00
                    CP: -3.00D+00 -3.00D+00  3.00D+00  3.00D+00  3.00D+00
                    CP:  3.00D+00  3.00D+00  3.00D+00  3.00D+00  1.70D+00
                    CP:  3.00D+00  1.85D+00
 E= -732.281677242131     Delta-E=        0.000002032878 Rises=F Damp=F
 DIIS: error= 2.65D-05 at cycle  58 NSaved=  20.
 NSaved=20 IEnMin=15 EnMin= -732.281695964192     IErMin=20 ErrMin= 2.65D-05
 ErrMax= 2.65D-05  0.00D+00 EMaxC= 1.00D-01 BMatC= 6.36D-07 BMatP= 1.59D-06
 IDIUse=1 WtCom= 1.00D+00 WtEn= 0.00D+00
 Coeff-Com:  0.261D-02-0.166D-02 0.505D-01 0.718D-01-0.155D-01-0.181D+00
 Coeff-Com: -0.481D+00 0.316D+00 0.657D+00-0.261D+00-0.187D+00 0.106D+00
 Coeff-Com:  0.157D+00-0.301D+00-0.151D+00 0.212D+00 0.370D+01-0.349D+01
 Coeff-Com: -0.165D+01 0.244D+01
 Coeff:      0.261D-02-0.166D-02 0.505D-01 0.718D-01-0.155D-01-0.181D+00
 Coeff:     -0.481D+00 0.316D+00 0.657D+00-0.261D+00-0.187D+00 0.106D+00
 Coeff:      0.157D+00-0.301D+00-0.151D+00 0.212D+00 0.370D+01-0.349D+01
 Coeff:     -0.165D+01 0.244D+01
 Gap=     0.131 Goal=   None    Shift=    0.000
 Gap=     0.262 Goal=   None    Shift=    0.000
 RMSDP=1.16D-04 MaxDP=7.85D-03 DE= 2.03D-06 OVMax= 8.40D-03

 Cycle  59  Pass 1  IDiag  1:
 RMSU=  4.85D-05    CP:  9.94D-01 -3.00D+00 -3.00D+00 -3.00D+00 -3.00D+00
                    CP: -3.00D+00 -3.00D+00  3.00D+00  3.00D+00  3.00D+00
                    CP:  3.00D+00  3.00D+00  3.00D+00  3.00D+00  1.84D+00
                    CP:  3.00D+00  2.83D+00  1.85D+00
 E= -732.281676451146     Delta-E=        0.000000790985 Rises=F Damp=F
 DIIS: error= 1.05D-04 at cycle  59 NSaved=  20.
 NSaved=20 IEnMin=14 EnMin= -732.281695964192     IErMin=19 ErrMin= 2.65D-05
 ErrMax= 1.05D-04  0.00D+00 EMaxC= 1.00D-01 BMatC= 2.49D-06 BMatP= 6.36D-07
 IDIUse=1 WtCom= 1.00D+00 WtEn= 0.00D+00
 Coeff-Com: -0.477D-02 0.739D-01 0.274D-02-0.272D+00 0.203D+00-0.495D+00
 Coeff-Com: -0.413D+00 0.346D+00 0.583D+00 0.107D+00-0.404D-01 0.527D-01
 Coeff-Com: -0.138D+00-0.169D+00 0.122D+00 0.552D+01-0.511D+01-0.176D+01
 Coeff-Com:  0.157D+01 0.812D+00
 Coeff:     -0.477D-02 0.739D-01 0.274D-02-0.272D+00 0.203D+00-0.495D+00
 Coeff:     -0.413D+00 0.346D+00 0.583D+00 0.107D+00-0.404D-01 0.527D-01
 Coeff:     -0.138D+00-0.169D+00 0.122D+00 0.552D+01-0.511D+01-0.176D+01
 Coeff:      0.157D+01 0.812D+00
 Gap=     0.131 Goal=   None    Shift=    0.000
 Gap=     0.262 Goal=   None    Shift=    0.000
 RMSDP=4.96D-05 MaxDP=3.06D-03 DE= 7.91D-07 OVMax= 7.25D-03

 Cycle  60  Pass 1  IDiag  1:
 RMSU=  2.16D-05    CP:  9.94D-01 -3.00D+00 -3.00D+00 -3.00D+00 -3.00D+00
                    CP: -3.00D+00 -3.00D+00  3.00D+00  3.00D+00  3.00D+00
                    CP:  3.00D+00  3.00D+00  3.00D+00  3.00D+00  1.83D+00
                    CP:  3.00D+00  3.00D+00  1.82D+00  1.69D+00
 E= -732.281676131006     Delta-E=        0.000000320140 Rises=F Damp=F
 DIIS: error= 1.44D-04 at cycle  60 NSaved=  20.
 NSaved=20 IEnMin=13 EnMin= -732.281695964192     IErMin=18 ErrMin= 2.65D-05
 ErrMax= 1.44D-04  0.00D+00 EMaxC= 1.00D-01 BMatC= 3.87D-06 BMatP= 6.36D-07
 IDIUse=1 WtCom= 1.00D+00 WtEn= 0.00D+00
 Coeff-Com:  0.297D-01 0.738D-01-0.178D-01 0.349D+00-0.534D+00-0.269D+00
 Coeff-Com:  0.418D+00 0.725D-01-0.530D-01-0.113D-01 0.420D-01-0.300D-01
 Coeff-Com: -0.285D+00 0.128D-01 0.415D+01-0.360D+01-0.872D+00 0.566D+00
 Coeff-Com:  0.114D+00 0.846D+00
 Coeff:      0.297D-01 0.738D-01-0.178D-01 0.349D+00-0.534D+00-0.269D+00
 Coeff:      0.418D+00 0.725D-01-0.530D-01-0.113D-01 0.420D-01-0.300D-01
 Coeff:     -0.285D+00 0.128D-01 0.415D+01-0.360D+01-0.872D+00 0.566D+00
 Coeff:      0.114D+00 0.846D+00
 Gap=     0.131 Goal=   None    Shift=    0.000
 Gap=     0.262 Goal=   None    Shift=    0.000
 RMSDP=4.87D-05 MaxDP=5.45D-03 DE= 3.20D-07 OVMax= 7.20D-03

 Cycle  61  Pass 1  IDiag  1:
 Restarting incremental Fock formation.
 E= -732.281677025208     Delta-E=       -0.000000894202 Rises=F Damp=F
 DIIS: error= 7.58D-05 at cycle  61 NSaved=  20.
 NSaved=20 IEnMin=12 EnMin= -732.281695964192     IErMin=17 ErrMin= 2.65D-05
 ErrMax= 7.58D-05  0.00D+00 EMaxC= 1.00D-01 BMatC= 1.26D-06 BMatP= 6.36D-07
 IDIUse=1 WtCom= 1.00D+00 WtEn= 0.00D+00
 Coeff-Com:  0.110D+00 0.120D+00-0.450D-01-0.730D-02 0.994D-02 0.678D-01
 Coeff-Com: -0.962D-01-0.107D+00 0.139D+00-0.726D-01 0.294D-01-0.224D+00
 Coeff-Com: -0.187D+00 0.180D+01-0.152D+01-0.310D+00 0.326D+00-0.372D+00
 Coeff-Com: -0.217D+00 0.155D+01
 Coeff:      0.110D+00 0.120D+00-0.450D-01-0.730D-02 0.994D-02 0.678D-01
 Coeff:     -0.962D-01-0.107D+00 0.139D+00-0.726D-01 0.294D-01-0.224D+00
 Coeff:     -0.187D+00 0.180D+01-0.152D+01-0.310D+00 0.326D+00-0.372D+00
 Coeff:     -0.217D+00 0.155D+01
 Gap=     0.131 Goal=   None    Shift=    0.000
 Gap=     0.262 Goal=   None    Shift=    0.000
 RMSDP=8.69D-05 MaxDP=9.69D-03 DE=-8.94D-07 OVMax= 1.22D-02

 Cycle  62  Pass 1  IDiag  1:
 RMSU=  8.60D-05    CP:  1.00D+00
 E= -732.281676912206     Delta-E=        0.000000113002 Rises=F Damp=F
 DIIS: error= 8.61D-05 at cycle  62 NSaved=  20.
 NSaved=20 IEnMin=11 EnMin= -732.281695964192     IErMin=16 ErrMin= 2.65D-05
 ErrMax= 8.61D-05  0.00D+00 EMaxC= 1.00D-01 BMatC= 1.49D-06 BMatP= 6.36D-07
 IDIUse=1 WtCom= 1.00D+00 WtEn= 0.00D+00
 Coeff-Com:  0.497D-01 0.718D-01 0.115D-01-0.152D-02-0.786D-01 0.105D-01
 Coeff-Com: -0.297D-01 0.914D-01-0.611D-02-0.286D-01-0.169D+00-0.767D-01
 Coeff-Com:  0.923D+00-0.754D+00-0.152D+00 0.257D+00-0.419D+00-0.626D+00
 Coeff-Com:  0.126D+01 0.667D+00
 Coeff:      0.497D-01 0.718D-01 0.115D-01-0.152D-02-0.786D-01 0.105D-01
 Coeff:     -0.297D-01 0.914D-01-0.611D-02-0.286D-01-0.169D+00-0.767D-01
 Coeff:      0.923D+00-0.754D+00-0.152D+00 0.257D+00-0.419D+00-0.626D+00
 Coeff:      0.126D+01 0.667D+00
 Gap=     0.131 Goal=   None    Shift=    0.000
 Gap=     0.262 Goal=   None    Shift=    0.000
 RMSDP=2.50D-05 MaxDP=2.99D-03 DE= 1.13D-07 OVMax= 4.10D-03

 Cycle  63  Pass 1  IDiag  1:
 RMSU=  1.46D-05    CP:  1.00D+00  1.24D+00
 E= -732.281677257480     Delta-E=       -0.000000345274 Rises=F Damp=F
 DIIS: error= 6.36D-05 at cycle  63 NSaved=  20.
 NSaved=20 IEnMin=10 EnMin= -732.281695964192     IErMin=15 ErrMin= 2.65D-05
 ErrMax= 6.36D-05  0.00D+00 EMaxC= 1.00D-01 BMatC= 7.63D-07 BMatP= 6.36D-07
 IDIUse=1 WtCom= 1.00D+00 WtEn= 0.00D+00
 Coeff-Com: -0.873D-01-0.828D-01 0.105D+00-0.288D+00 0.400D+00-0.450D-03
 Coeff-Com: -0.204D+00 0.123D+00 0.670D-01 0.476D-01-0.944D-01 0.725D+00
 Coeff-Com: -0.786D+00-0.252D+00 0.555D+00 0.494D-01-0.422D+00 0.921D-01
 Coeff-Com: -0.137D+01 0.242D+01
 Coeff:     -0.873D-01-0.828D-01 0.105D+00-0.288D+00 0.400D+00-0.450D-03
 Coeff:     -0.204D+00 0.123D+00 0.670D-01 0.476D-01-0.944D-01 0.725D+00
 Coeff:     -0.786D+00-0.252D+00 0.555D+00 0.494D-01-0.422D+00 0.921D-01
 Coeff:     -0.137D+01 0.242D+01
 Gap=     0.131 Goal=   None    Shift=    0.000
 Gap=     0.262 Goal=   None    Shift=    0.000
 RMSDP=5.95D-05 MaxDP=7.69D-03 DE=-3.45D-07 OVMax= 1.03D-02

 Cycle  64  Pass 1  IDiag  1:
 RMSU=  2.20D-05    CP:  1.00D+00  1.80D+00  2.86D+00
 E= -732.281677809479     Delta-E=       -0.000000551999 Rises=F Damp=F
 DIIS: error= 1.46D-05 at cycle  64 NSaved=  20.
 NSaved=20 IEnMin= 9 EnMin= -732.281695964192     IErMin=20 ErrMin= 1.46D-05
 ErrMax= 1.46D-05  0.00D+00 EMaxC= 1.00D-01 BMatC= 7.30D-08 BMatP= 6.36D-07
 IDIUse=1 WtCom= 1.00D+00 WtEn= 0.00D+00
 Coeff-Com: -0.291D-01-0.262D-01 0.851D-02 0.771D-01-0.122D-01-0.624D-01
 Coeff-Com:  0.197D-01 0.257D-01 0.361D-02 0.164D-02 0.539D+00-0.526D+00
 Coeff-Com: -0.172D+00 0.165D+00 0.883D-01 0.165D+00-0.170D+00-0.884D+00
 Coeff-Com:  0.733D+00 0.106D+01
 Coeff:     -0.291D-01-0.262D-01 0.851D-02 0.771D-01-0.122D-01-0.624D-01
 Coeff:      0.197D-01 0.257D-01 0.361D-02 0.164D-02 0.539D+00-0.526D+00
 Coeff:     -0.172D+00 0.165D+00 0.883D-01 0.165D+00-0.170D+00-0.884D+00
 Coeff:      0.733D+00 0.106D+01
 Gap=     0.131 Goal=   None    Shift=    0.000
 Gap=     0.262 Goal=   None    Shift=    0.000
 RMSDP=1.38D-05 MaxDP=1.64D-03 DE=-5.52D-07 OVMax= 2.35D-03

 Cycle  65  Pass 1  IDiag  1:
 RMSU=  4.17D-06    CP:  1.00D+00  1.94D+00  3.00D+00  1.08D+00
 E= -732.281677940485     Delta-E=       -0.000000131005 Rises=F Damp=F
 DIIS: error= 9.51D-06 at cycle  65 NSaved=  20.
 NSaved=20 IEnMin= 8 EnMin= -732.281695964192     IErMin=20 ErrMin= 9.51D-06
 ErrMax= 9.51D-06  0.00D+00 EMaxC= 1.00D-01 BMatC= 2.82D-08 BMatP= 7.30D-08
 IDIUse=1 WtCom= 1.00D+00 WtEn= 0.00D+00
 Coeff-Com:  0.309D-01-0.197D-02-0.163D-01-0.472D-02 0.364D-01-0.362D-01
 Coeff-Com: -0.281D-02-0.334D-01 0.287D-02 0.334D+00-0.283D+00-0.545D-01
 Coeff-Com: -0.183D-01-0.161D-01 0.155D+00 0.895D-01-0.573D-01-0.313D+00
 Coeff-Com:  0.333D-01 0.116D+01
 Coeff:      0.309D-01-0.197D-02-0.163D-01-0.472D-02 0.364D-01-0.362D-01
 Coeff:     -0.281D-02-0.334D-01 0.287D-02 0.334D+00-0.283D+00-0.545D-01
 Coeff:     -0.183D-01-0.161D-01 0.155D+00 0.895D-01-0.573D-01-0.313D+00
 Coeff:      0.333D-01 0.116D+01
 Gap=     0.131 Goal=   None    Shift=    0.000
 Gap=     0.262 Goal=   None    Shift=    0.000
 RMSDP=4.45D-06 MaxDP=3.10D-04 DE=-1.31D-07 OVMax= 4.84D-04

 Cycle  66  Pass 1  IDiag  1:
 RMSU=  1.78D-06    CP:  1.00D+00  1.98D+00  3.00D+00  1.14D+00  1.40D+00
 E= -732.281678007865     Delta-E=       -0.000000067380 Rises=F Damp=F
 DIIS: error= 9.46D-06 at cycle  66 NSaved=  20.
 NSaved=20 IEnMin= 7 EnMin= -732.281695964192     IErMin=20 ErrMin= 9.46D-06
 ErrMax= 9.46D-06  0.00D+00 EMaxC= 1.00D-01 BMatC= 2.64D-08 BMatP= 2.82D-08
 IDIUse=1 WtCom= 1.00D+00 WtEn= 0.00D+00
 Coeff-Com: -0.102D-01 0.214D-01 0.486D-02 0.421D-01-0.573D-01 0.280D-02
 Coeff-Com: -0.169D-01-0.997D-02 0.231D+00-0.200D+00-0.455D-01 0.271D-01
 Coeff-Com: -0.124D-01 0.424D-01 0.102D+00-0.137D+00-0.366D-01-0.548D-01
 Coeff-Com:  0.317D-01 0.108D+01
 Coeff:     -0.102D-01 0.214D-01 0.486D-02 0.421D-01-0.573D-01 0.280D-02
 Coeff:     -0.169D-01-0.997D-02 0.231D+00-0.200D+00-0.455D-01 0.271D-01
 Coeff:     -0.124D-01 0.424D-01 0.102D+00-0.137D+00-0.366D-01-0.548D-01
 Coeff:      0.317D-01 0.108D+01
 Gap=     0.131 Goal=   None    Shift=    0.000
 Gap=     0.262 Goal=   None    Shift=    0.000
 RMSDP=5.43D-06 MaxDP=3.41D-04 DE=-6.74D-08 OVMax= 4.53D-04

 Cycle  67  Pass 1  IDiag  1:
 RMSU=  1.84D-06    CP:  1.00D+00  2.03D+00  3.00D+00  1.13D+00  1.28D+00
                    CP:  2.28D+00
 E= -732.281678064802     Delta-E=       -0.000000056938 Rises=F Damp=F
 DIIS: error= 1.16D-05 at cycle  67 NSaved=  20.
 NSaved=20 IEnMin= 6 EnMin= -732.281695964192     IErMin=19 ErrMin= 9.46D-06
 ErrMax= 1.16D-05  0.00D+00 EMaxC= 1.00D-01 BMatC= 4.51D-08 BMatP= 2.64D-08
 IDIUse=1 WtCom= 1.00D+00 WtEn= 0.00D+00
 Coeff-Com: -0.118D-01 0.281D-01 0.387D-01-0.542D-01 0.486D-02-0.171D-01
 Coeff-Com: -0.131D-01 0.227D+00-0.197D+00-0.433D-01 0.304D-01-0.144D-01
 Coeff-Com:  0.302D-01 0.110D+00-0.145D+00-0.151D-01-0.719D-01-0.206D-01
 Coeff-Com:  0.101D+01 0.122D+00
 Coeff:     -0.118D-01 0.281D-01 0.387D-01-0.542D-01 0.486D-02-0.171D-01
 Coeff:     -0.131D-01 0.227D+00-0.197D+00-0.433D-01 0.304D-01-0.144D-01
 Coeff:      0.302D-01 0.110D+00-0.145D+00-0.151D-01-0.719D-01-0.206D-01
 Coeff:      0.101D+01 0.122D+00
 Gap=     0.131 Goal=   None    Shift=    0.000
 Gap=     0.262 Goal=   None    Shift=    0.000
 RMSDP=1.28D-06 MaxDP=7.80D-05 DE=-5.69D-08 OVMax= 1.26D-04

 Cycle  68  Pass 1  IDiag  1:
 RMSU=  7.75D-08    CP:  1.00D+00  2.04D+00  3.00D+00  1.12D+00  1.25D+00
                    CP:  2.52D+00  1.27D+00
 E= -732.281678076065     Delta-E=       -0.000000011262 Rises=F Damp=F
 DIIS: error= 1.26D-05 at cycle  68 NSaved=  20.
 NSaved=20 IEnMin= 5 EnMin= -732.281695964192     IErMin=18 ErrMin= 9.46D-06
 ErrMax= 1.26D-05  0.00D+00 EMaxC= 1.00D-01 BMatC= 5.03D-08 BMatP= 2.64D-08
 IDIUse=1 WtCom= 1.00D+00 WtEn= 0.00D+00
 Coeff-Com:  0.841D-02 0.323D-01-0.342D-01 0.720D-03-0.201D-01-0.683D-02
 Coeff-Com:  0.169D+00-0.144D+00-0.399D-01 0.187D-01-0.261D-01 0.195D-01
 Coeff-Com:  0.102D+00-0.207D-01-0.749D-01-0.892D-01 0.173D+00 0.110D+01
 Coeff-Com:  0.320D+01-0.337D+01
 Coeff:      0.841D-02 0.323D-01-0.342D-01 0.720D-03-0.201D-01-0.683D-02
 Coeff:      0.169D+00-0.144D+00-0.399D-01 0.187D-01-0.261D-01 0.195D-01
 Coeff:      0.102D+00-0.207D-01-0.749D-01-0.892D-01 0.173D+00 0.110D+01
 Coeff:      0.320D+01-0.337D+01
 Gap=     0.131 Goal=   None    Shift=    0.000
 Gap=     0.262 Goal=   None    Shift=    0.000
 RMSDP=6.45D-06 MaxDP=4.34D-04 DE=-1.13D-08 OVMax= 7.40D-04

 Cycle  69  Pass 1  IDiag  1:
 RMSU=  3.45D-07    CP:  1.00D+00  1.98D+00  3.00D+00  1.11D+00  1.20D+00
                    CP:  1.30D+00 -1.58D-01 -5.03D-01
 E= -732.281678005487     Delta-E=        0.000000070578 Rises=F Damp=F
 DIIS: error= 9.33D-06 at cycle  69 NSaved=  20.
 NSaved=20 IEnMin= 4 EnMin= -732.281695964192     IErMin=20 ErrMin= 9.33D-06
 ErrMax= 9.33D-06  0.00D+00 EMaxC= 1.00D-01 BMatC= 3.08D-08 BMatP= 2.64D-08
 IDIUse=1 WtCom= 1.00D+00 WtEn= 0.00D+00
 Large coefficients: NSaved= 20 BigCof=   14.00 CofMax=   10.00 Det=-2.72D-12
 Inversion failed.  Reducing to 19 matrices.
 Large coefficients: NSaved= 19 BigCof=   14.19 CofMax=   10.00 Det=-2.73D-12
 Inversion failed.  Reducing to 18 matrices.
 Large coefficients: NSaved= 18 BigCof=   13.82 CofMax=   10.00 Det=-2.75D-12
 Inversion failed.  Reducing to 17 matrices.
 Large coefficients: NSaved= 17 BigCof=   10.08 CofMax=   10.00 Det=-3.91D-12
 Inversion failed.  Reducing to 16 matrices.
 Large coefficients: NSaved= 16 BigCof=   10.15 CofMax=   10.00 Det=-4.06D-12
 Inversion failed.  Reducing to 15 matrices.
 Coeff-Com:  0.590D-03 0.384D-04 0.962D-02-0.387D-02 0.756D-02-0.132D-01
 Coeff-Com: -0.386D-01 0.358D-01 0.114D+00 0.673D-01-0.128D+00 0.639D+00
 Coeff-Com:  0.697D+01-0.929D+01 0.263D+01
 Coeff:      0.590D-03 0.384D-04 0.962D-02-0.387D-02 0.756D-02-0.132D-01
 Coeff:     -0.386D-01 0.358D-01 0.114D+00 0.673D-01-0.128D+00 0.639D+00
 Coeff:      0.697D+01-0.929D+01 0.263D+01
 Gap=     0.131 Goal=   None    Shift=    0.000
 Gap=     0.262 Goal=   None    Shift=    0.000
 RMSDP=2.83D-05 MaxDP=2.83D-03 DE= 7.06D-08 OVMax= 4.23D-03

 Cycle  70  Pass 1  IDiag  1:
 RMSU=  1.84D-06    CP:  1.00D+00  1.68D+00  3.00D+00  9.00D-01  1.98D-01
                    CP: -1.42D+00 -3.00D+00 -3.00D+00  3.00D+00
 E= -732.281677721686     Delta-E=        0.000000283801 Rises=F Damp=F
 DIIS: error= 9.46D-06 at cycle  70 NSaved=  16.
 NSaved=16 IEnMin= 3 EnMin= -732.281695964192     IErMin=15 ErrMin= 9.33D-06
 ErrMax= 9.46D-06  0.00D+00 EMaxC= 1.00D-01 BMatC= 1.63D-08 BMatP= 2.64D-08
 IDIUse=1 WtCom= 1.00D+00 WtEn= 0.00D+00
 Coeff-Com: -0.290D-01 0.139D-01 0.595D-01-0.210D-01 0.671D-01-0.104D+00
 Coeff-Com: -0.821D-01 0.146D+00 0.213D+00 0.533D+00-0.712D+00-0.225D+01
 Coeff-Com:  0.561D+01-0.838D+01 0.306D+01 0.287D+01
 Coeff:     -0.290D-01 0.139D-01 0.595D-01-0.210D-01 0.671D-01-0.104D+00
 Coeff:     -0.821D-01 0.146D+00 0.213D+00 0.533D+00-0.712D+00-0.225D+01
 Coeff:      0.561D+01-0.838D+01 0.306D+01 0.287D+01
 Gap=     0.131 Goal=   None    Shift=    0.000
 Gap=     0.262 Goal=   None    Shift=    0.000
 RMSDP=1.04D-04 MaxDP=1.08D-02 DE= 2.84D-07 OVMax= 1.62D-02

 Cycle  71  Pass 1  IDiag  1:
 RMSU=  2.30D-05    CP:  1.00D+00  5.44D-01  2.88D+00  3.38D-01 -3.00D+00
                    CP: -3.00D+00 -3.00D+00 -3.00D+00  3.00D+00  3.00D+00
 E= -732.281676794362     Delta-E=        0.000000927324 Rises=F Damp=F
 DIIS: error= 1.17D-05 at cycle  71 NSaved=  17.
 NSaved=17 IEnMin= 3 EnMin= -732.281695964192     IErMin=15 ErrMin= 9.33D-06
 ErrMax= 1.17D-05  0.00D+00 EMaxC= 1.00D-01 BMatC= 2.63D-08 BMatP= 1.63D-08
 IDIUse=1 WtCom= 1.00D+00 WtEn= 0.00D+00
 Coeff-Com: -0.331D-01 0.199D-01 0.628D-01-0.285D-01-0.169D+00 0.120D+00
 Coeff-Com: -0.238D-01 0.119D+00 0.332D+00 0.208D+00-0.203D+01-0.309D+01
 Coeff-Com: -0.258D+00-0.177D+00 0.144D+01 0.293D+01 0.157D+01
 Coeff:     -0.331D-01 0.199D-01 0.628D-01-0.285D-01-0.169D+00 0.120D+00
 Coeff:     -0.238D-01 0.119D+00 0.332D+00 0.208D+00-0.203D+01-0.309D+01
 Coeff:     -0.258D+00-0.177D+00 0.144D+01 0.293D+01 0.157D+01
 Gap=     0.131 Goal=   None    Shift=    0.000
 Gap=     0.262 Goal=   None    Shift=    0.000
 RMSDP=1.96D-04 MaxDP=2.04D-02 DE= 9.27D-07 OVMax= 3.11D-02

 Cycle  72  Pass 1  IDiag  1:
 RMSU=  1.90D-05    CP:  1.00D+00 -1.59D+00  1.81D+00 -9.00D-01 -3.00D+00
                    CP: -3.00D+00 -3.00D+00 -3.00D+00  3.00D+00  3.00D+00
                    CP:  3.00D+00
 E= -732.281675484138     Delta-E=        0.000001310224 Rises=F Damp=F
 DIIS: error= 3.01D-05 at cycle  72 NSaved=  18.
 NSaved=18 IEnMin= 3 EnMin= -732.281695964192     IErMin=15 ErrMin= 9.33D-06
 ErrMax= 3.01D-05  0.00D+00 EMaxC= 1.00D-01 BMatC= 9.92D-08 BMatP= 1.63D-08
 IDIUse=1 WtCom= 1.00D+00 WtEn= 0.00D+00
 Coeff-Com: -0.297D-01 0.168D-01 0.557D-01-0.235D-01-0.187D+00 0.141D+00
 Coeff-Com: -0.163D-01 0.103D+00 0.368D+00 0.136D+00-0.200D+01-0.259D+01
 Coeff-Com:  0.881D+00-0.166D+01 0.164D+01 0.268D+01 0.140D+01 0.912D-01
 Coeff:     -0.297D-01 0.168D-01 0.557D-01-0.235D-01-0.187D+00 0.141D+00
 Coeff:     -0.163D-01 0.103D+00 0.368D+00 0.136D+00-0.200D+01-0.259D+01
 Coeff:      0.881D+00-0.166D+01 0.164D+01 0.268D+01 0.140D+01 0.912D-01
 Gap=     0.131 Goal=   None    Shift=    0.000
 Gap=     0.262 Goal=   None    Shift=    0.000
 RMSDP=1.38D-06 MaxDP=1.59D-04 DE= 1.31D-06 OVMax= 2.33D-04

 Cycle  73  Pass 1  IDiag  1:
 RMSU=  3.43D-07    CP:  1.00D+00 -1.60D+00  1.74D+00 -9.26D-01 -3.00D+00
                    CP: -3.00D+00 -3.00D+00 -3.00D+00  3.00D+00  3.00D+00
                    CP:  3.00D+00  1.00D+00
 E= -732.281675484879     Delta-E=       -0.000000000741 Rises=F Damp=F
 DIIS: error= 2.81D-05 at cycle  73 NSaved=  19.
 NSaved=19 IEnMin= 3 EnMin= -732.281695964192     IErMin=15 ErrMin= 9.33D-06
 ErrMax= 2.81D-05  0.00D+00 EMaxC= 1.00D-01 BMatC= 8.67D-08 BMatP= 1.63D-08
 IDIUse=1 WtCom= 1.00D+00 WtEn= 0.00D+00
 Large coefficients: NSaved= 19 BigCof=   27.14 CofMax=   10.00 Det=-2.40D-12
 Inversion failed.  Reducing to 18 matrices.
 Large coefficients: NSaved= 18 BigCof=   25.15 CofMax=   10.00 Det=-3.67D-12
 Inversion failed.  Reducing to 17 matrices.
 Large coefficients: NSaved= 17 BigCof=   24.77 CofMax=   10.00 Det=-3.71D-12
 Inversion failed.  Reducing to 16 matrices.
 Large coefficients: NSaved= 16 BigCof=   24.33 CofMax=   10.00 Det=-7.72D-12
 Inversion failed.  Reducing to 15 matrices.
 Large coefficients: NSaved= 15 BigCof=   24.56 CofMax=   10.00 Det=-8.21D-12
 Inversion failed.  Reducing to 14 matrices.
 Large coefficients: NSaved= 14 BigCof=   24.52 CofMax=   10.00 Det=-9.13D-12
 Inversion failed.  Reducing to 13 matrices.
 Large coefficients: NSaved= 13 BigCof=   24.72 CofMax=   10.00 Det=-9.15D-12
 Inversion failed.  Reducing to 12 matrices.
 Large coefficients: NSaved= 12 BigCof=   24.58 CofMax=   10.00 Det=-9.15D-12
 Inversion failed.  Reducing to 11 matrices.
 Large coefficients: NSaved= 11 BigCof=   23.92 CofMax=   10.00 Det=-1.06D-11
 Inversion failed.  Reducing to 10 matrices.
 Large coefficients: NSaved= 10 BigCof=   24.01 CofMax=   10.00 Det=-1.06D-11
 Inversion failed.  Reducing to  9 matrices.
 Large coefficients: NSaved=  9 BigCof=   14.20 CofMax=   10.00 Det=-4.06D-11
 Inversion failed.  Reducing to  8 matrices.
 Large coefficients: NSaved=  8 BigCof=   14.27 CofMax=   10.00 Det=-4.09D-11
 Inversion failed.  Reducing to  7 matrices.
 Large coefficients: NSaved=  7 BigCof=   13.93 CofMax=   10.00 Det=-5.05D-11
 Inversion failed.  Reducing to  6 matrices.
 Large coefficients: NSaved=  6 BigCof=   13.95 CofMax=   10.00 Det=-1.01D-10
 Inversion failed.  Reducing to  5 matrices.
 Large coefficients: NSaved=  5 BigCof=   14.26 CofMax=   10.00 Det=-1.40D-10
 Inversion failed.  Reducing to  4 matrices.
 Large coefficients: NSaved=  4 BigCof=   14.15 CofMax=   10.00 Det=-1.50D-10
 Inversion failed.  Reducing to  3 matrices.
 Large coefficients: NSaved=  3 BigCof=   14.22 CofMax=   10.00 Det=-2.14D-10
 Inversion failed.  Reducing to  2 matrices.
 Large coefficients: NSaved=  2 BigCof=   13.91 CofMax=   10.00 Det=-4.67D-10
 Coeff-Com: -0.129D+02 0.139D+02
 Coeff:     -0.129D+02 0.139D+02
 Gap=     0.131 Goal=   None    Shift=    0.000
 Gap=     0.262 Goal=   None    Shift=    0.000
 RMSDP=1.77D-05 MaxDP=2.08D-03 DE=-7.41D-10 OVMax= 2.95D-03

 Cycle  74  Pass 1  IDiag  1:
 RMSU=  4.79D-06    CP:  1.00D+00 -1.70D+00  9.09D-01 -1.27D+00 -3.00D+00
                    CP: -3.00D+00 -3.00D+00 -3.00D+00  3.00D+00  3.00D+00
                    CP:  3.00D+00  9.59D-01  3.00D+00
 E= -732.281675485650     Delta-E=       -0.000000000771 Rises=F Damp=F
 DIIS: error= 8.28D-06 at cycle  74 NSaved=   3.
 NSaved= 3 IEnMin= 3 EnMin= -732.281675485650     IErMin= 3 ErrMin= 8.28D-06
 ErrMax= 8.28D-06  0.00D+00 EMaxC= 1.00D-01 BMatC= 8.68D-09 BMatP= 8.67D-08
 IDIUse=1 WtCom= 1.00D+00 WtEn= 0.00D+00
 Coeff-Com: -0.551D+01 0.596D+01 0.556D+00
 Coeff:     -0.551D+01 0.596D+01 0.556D+00
 Gap=     0.131 Goal=   None    Shift=    0.000
 Gap=     0.262 Goal=   None    Shift=    0.000
 RMSDP=9.58D-07 MaxDP=6.98D-05 DE=-7.71D-10 OVMax= 8.54D-05

 Error on total polarization charges =  0.04300
 SCF Done:  E(UM062X) =  -732.281675486     A.U. after   74 cycles
            NFock= 74  Conv=0.96D-06     -V/T= 2.0642
 <Sx>= 0.0000 <Sy>= 0.0000 <Sz>= 1.5000 <S**2>= 4.7676 S= 1.7400
 <L.S>=  0.00000000000    
 KE= 6.881312100385D+02 PE=-3.321178491429D+03 EE= 1.070688723453D+03
 SMD-CDS (non-electrostatic) energy       (kcal/mol) =       5.78
 (included in total energy above)
 Annihilation of the first spin contaminant:
 S**2 before annihilation     4.7676,   after     3.7780
 Leave Link  502 at Wed May 24 01:16:12 2023, MaxMem=  2684354560 cpu:            3530.5 elap:             354.2
 (Enter /home/xut/apps/g16/l601.exe)
 Copying SCF densities to generalized density rwf, IOpCl= 1 IROHF=0.

 **********************************************************************

            Population analysis using the SCF density.

 **********************************************************************

 Orbital symmetries:
 Alpha Orbitals:
       Occupied  (A) (A) (A) (A) (A) (A) (A) (A) (A) (A) (A) (A)
                 (A) (A) (A) (A) (A) (A) (A) (A) (A) (A) (A) (A)
                 (A) (A) (A) (A) (A) (A) (A) (A) (A) (A) (A) (A)
                 (A) (A) (A) (A) (A) (A) (A) (A) (A) (A) (A) (A)
                 (A) (A) (A)
       Virtual   (A) (A) (A) (A) (A) (A) (A) (A) (A) (A) (A) (A)
                 (A) (A) (A) (A) (A) (A) (A) (A) (A) (A) (A) (A)
                 (A) (A) (A) (A) (A) (A) (A) (A) (A) (A) (A) (A)
                 (A) (A) (A) (A) (A) (A) (A) (A) (A) (A) (A) (A)
                 (A) (A) (A) (A) (A) (A) (A) (A) (A) (A) (A) (A)
                 (A) (A) (A) (A) (A) (A) (A) (A) (A) (A) (A) (A)
                 (A) (A) (A) (A) (A) (A) (A) (A) (A) (A) (A) (A)
                 (A) (A) (A) (A) (A) (A) (A) (A) (A) (A) (A) (A)
                 (A) (A) (A) (A) (A) (A) (A) (A) (A) (A) (A) (A)
                 (A) (A) (A) (A) (A) (A) (A) (A) (A) (A) (A) (A)
                 (A) (A) (A) (A) (A) (A) (A) (A) (A) (A) (A) (A)
                 (A) (A) (A) (A) (A) (A) (A) (A) (A) (A) (A) (A)
                 (A) (A) (A) (A) (A) (A) (A) (A) (A) (A) (A) (A)
                 (A) (A) (A) (A) (A) (A) (A) (A) (A) (A) (A) (A)
                 (A) (A) (A) (A) (A) (A) (A) (A) (A) (A) (A) (A)
                 (A) (A) (A) (A) (A) (A) (A) (A) (A) (A) (A) (A)
                 (A) (A) (A) (A) (A) (A) (A) (A) (A) (A) (A) (A)
                 (A) (A) (A) (A) (A) (A) (A) (A) (A) (A) (A) (A)
                 (A) (A) (A) (A) (A) (A) (A) (A) (A) (A) (A) (A)
                 (A) (A) (A) (A) (A) (A) (A) (A) (A) (A) (A) (A)
                 (A) (A) (A) (A) (A) (A) (A) (A) (A) (A) (A) (A)
                 (A) (A) (A) (A) (A) (A) (A) (A) (A) (A) (A) (A)
                 (A) (A) (A) (A) (A) (A) (A) (A) (A) (A) (A) (A)
 Beta  Orbitals:
       Occupied  (A) (A) (A) (A) (A) (A) (A) (A) (A) (A) (A) (A)
                 (A) (A) (A) (A) (A) (A) (A) (A) (A) (A) (A) (A)
                 (A) (A) (A) (A) (A) (A) (A) (A) (A) (A) (A) (A)
                 (A) (A) (A) (A) (A) (A) (A) (A) (A) (A) (A) (A)
       Virtual   (A) (A) (A) (A) (A) (A) (A) (A) (A) (A) (A) (A)
                 (A) (A) (A) (A) (A) (A) (A) (A) (A) (A) (A) (A)
                 (A) (A) (A) (A) (A) (A) (A) (A) (A) (A) (A) (A)
                 (A) (A) (A) (A) (A) (A) (A) (A) (A) (A) (A) (A)
                 (A) (A) (A) (A) (A) (A) (A) (A) (A) (A) (A) (A)
                 (A) (A) (A) (A) (A) (A) (A) (A) (A) (A) (A) (A)
                 (A) (A) (A) (A) (A) (A) (A) (A) (A) (A) (A) (A)
                 (A) (A) (A) (A) (A) (A) (A) (A) (A) (A) (A) (A)
                 (A) (A) (A) (A) (A) (A) (A) (A) (A) (A) (A) (A)
                 (A) (A) (A) (A) (A) (A) (A) (A) (A) (A) (A) (A)
                 (A) (A) (A) (A) (A) (A) (A) (A) (A) (A) (A) (A)
                 (A) (A) (A) (A) (A) (A) (A) (A) (A) (A) (A) (A)
                 (A) (A) (A) (A) (A) (A) (A) (A) (A) (A) (A) (A)
                 (A) (A) (A) (A) (A) (A) (A) (A) (A) (A) (A) (A)
                 (A) (A) (A) (A) (A) (A) (A) (A) (A) (A) (A) (A)
                 (A) (A) (A) (A) (A) (A) (A) (A) (A) (A) (A) (A)
                 (A) (A) (A) (A) (A) (A) (A) (A) (A) (A) (A) (A)
                 (A) (A) (A) (A) (A) (A) (A) (A) (A) (A) (A) (A)
                 (A) (A) (A) (A) (A) (A) (A) (A) (A) (A) (A) (A)
                 (A) (A) (A) (A) (A) (A) (A) (A) (A) (A) (A) (A)
                 (A) (A) (A) (A) (A) (A) (A) (A) (A) (A) (A) (A)
                 (A) (A) (A) (A) (A) (A) (A) (A) (A) (A) (A) (A)
                 (A) (A) (A) (A) (A) (A) (A) (A) (A) (A) (A) (A)
                 (A) (A) (A)
 The electronic state is 4-A.
 Alpha  occ. eigenvalues --  -19.74290 -19.71513 -19.70514 -19.69937 -19.67526
 Alpha  occ. eigenvalues --  -10.74331 -10.70628 -10.69036 -10.67639 -10.63651
 Alpha  occ. eigenvalues --  -10.59968 -10.59880  -3.14983  -2.08163  -2.08141
 Alpha  occ. eigenvalues --   -2.08021  -1.28106  -1.26815  -1.23321  -1.22024
 Alpha  occ. eigenvalues --   -1.19459  -1.02852  -0.92231  -0.90137  -0.80829
 Alpha  occ. eigenvalues --   -0.78624  -0.74998  -0.71823  -0.69333  -0.65296
 Alpha  occ. eigenvalues --   -0.64116  -0.63812  -0.60385  -0.58373  -0.56678
 Alpha  occ. eigenvalues --   -0.56403  -0.54439  -0.52470  -0.51451  -0.51328
 Alpha  occ. eigenvalues --   -0.48866  -0.48357  -0.48201  -0.44903  -0.43951
 Alpha  occ. eigenvalues --   -0.42614  -0.40749  -0.38705  -0.38185  -0.37243
 Alpha  occ. eigenvalues --   -0.32469
 Alpha virt. eigenvalues --   -0.19326  -0.05402  -0.04698  -0.00905  -0.00148
 Alpha virt. eigenvalues --   -0.00078   0.00559   0.01417   0.01669   0.02295
 Alpha virt. eigenvalues --    0.03643   0.04312   0.04650   0.04950   0.05572
 Alpha virt. eigenvalues --    0.06540   0.07524   0.07675   0.08409   0.09518
 Alpha virt. eigenvalues --    0.10080   0.10167   0.10781   0.11154   0.11370
 Alpha virt. eigenvalues --    0.11761   0.12603   0.13332   0.13882   0.14491
 Alpha virt. eigenvalues --    0.14617   0.15043   0.15349   0.15683   0.16728
 Alpha virt. eigenvalues --    0.17085   0.17355   0.17464   0.19100   0.19265
 Alpha virt. eigenvalues --    0.20168   0.20375   0.20870   0.21504   0.22693
 Alpha virt. eigenvalues --    0.23224   0.23268   0.23769   0.24340   0.25313
 Alpha virt. eigenvalues --    0.25473   0.26428   0.26957   0.27268   0.27661
 Alpha virt. eigenvalues --    0.27940   0.29758   0.29882   0.30076   0.30456
 Alpha virt. eigenvalues --    0.31049   0.31364   0.32207   0.32260   0.33021
 Alpha virt. eigenvalues --    0.33992   0.35309   0.35773   0.36411   0.37295
 Alpha virt. eigenvalues --    0.37767   0.38195   0.39005   0.40115   0.40488
 Alpha virt. eigenvalues --    0.41609   0.42809   0.44366   0.44804   0.46329
 Alpha virt. eigenvalues --    0.46865   0.51165   0.52463   0.53009   0.54016
 Alpha virt. eigenvalues --    0.58212   0.58446   0.59965   0.60073   0.61403
 Alpha virt. eigenvalues --    0.62364   0.63040   0.64108   0.64311   0.64964
 Alpha virt. eigenvalues --    0.65847   0.67669   0.68103   0.69031   0.69153
 Alpha virt. eigenvalues --    0.71024   0.72530   0.74163   0.75327   0.76737
 Alpha virt. eigenvalues --    0.77932   0.78860   0.81279   0.83384   0.85116
 Alpha virt. eigenvalues --    0.86188   0.87840   0.88881   0.90733   0.92723
 Alpha virt. eigenvalues --    0.93957   0.94172   0.95566   0.96175   0.99120
 Alpha virt. eigenvalues --    1.01282   1.02690   1.02912   1.03985   1.09123
 Alpha virt. eigenvalues --    1.09994   1.11892   1.12223   1.14285   1.15852
 Alpha virt. eigenvalues --    1.16200   1.17879   1.19294   1.20181   1.20923
 Alpha virt. eigenvalues --    1.22309   1.23049   1.24260   1.25017   1.25451
 Alpha virt. eigenvalues --    1.25825   1.28325   1.29846   1.30084   1.34809
 Alpha virt. eigenvalues --    1.41760   1.42489   1.44308   1.44433   1.45779
 Alpha virt. eigenvalues --    1.48806   1.51293   1.53047   1.55448   1.55742
 Alpha virt. eigenvalues --    1.59785   1.61024   1.62039   1.62822   1.66075
 Alpha virt. eigenvalues --    1.67725   1.69382   1.72052   1.73592   1.75728
 Alpha virt. eigenvalues --    1.77516   1.78365   1.82624   1.83690   1.86776
 Alpha virt. eigenvalues --    1.88625   1.89192   1.90916   1.93371   1.94562
 Alpha virt. eigenvalues --    1.96322   1.99448   2.02407   2.03021   2.08384
 Alpha virt. eigenvalues --    2.12541   2.14358   2.14813   2.15724   2.17258
 Alpha virt. eigenvalues --    2.19971   2.24986   2.29091   2.31502   2.33701
 Alpha virt. eigenvalues --    2.40313   2.51689   2.58358   2.59485   2.59965
 Alpha virt. eigenvalues --    2.64595   2.66137   2.68683   2.69879   2.71547
 Alpha virt. eigenvalues --    2.73503   2.74628   2.76325   2.77140   2.82484
 Alpha virt. eigenvalues --    2.85450   2.89745   2.92147   2.94862   3.03495
 Alpha virt. eigenvalues --    3.05895   3.08150   3.08538   3.09054   3.09207
 Alpha virt. eigenvalues --    3.09989   3.10993   3.12202   3.16777   3.20430
 Alpha virt. eigenvalues --    3.20839   3.21427   3.23354   3.24066   3.32961
 Alpha virt. eigenvalues --    3.35988   3.37736   3.40204   3.43558   3.47787
 Alpha virt. eigenvalues --    3.49354   3.52630   3.59220   3.61779   3.64896
 Alpha virt. eigenvalues --    3.72615   3.77401   3.90811   3.92683   3.93433
 Alpha virt. eigenvalues --    3.95493   4.08081   4.11552   4.14593   4.17777
 Alpha virt. eigenvalues --    4.20149   4.30527   4.82389   5.02111   5.07999
 Alpha virt. eigenvalues --    5.08501   5.12866   5.13159   5.25951   5.45075
 Alpha virt. eigenvalues --    5.45854   5.51694   5.54506   5.67649   5.74271
 Alpha virt. eigenvalues --    5.83690   5.86696   5.93861  10.94570  23.56590
 Alpha virt. eigenvalues --   23.88343  23.91921  23.93555  24.03426  24.11411
 Alpha virt. eigenvalues --   24.19109  49.93125  49.95957  50.01132  50.03828
 Alpha virt. eigenvalues --   50.09717
  Beta  occ. eigenvalues --  -19.74803 -19.71821 -19.70507 -19.70038 -19.67498
  Beta  occ. eigenvalues --  -10.74288 -10.70813 -10.69143 -10.67663 -10.63786
  Beta  occ. eigenvalues --  -10.59934 -10.59804  -2.94032  -1.86616  -1.86521
  Beta  occ. eigenvalues --   -1.80646  -1.28164  -1.28048  -1.24167  -1.22626
  Beta  occ. eigenvalues --   -1.19424  -1.03629  -0.93418  -0.90358  -0.81255
  Beta  occ. eigenvalues --   -0.78994  -0.75041  -0.72124  -0.69885  -0.65717
  Beta  occ. eigenvalues --   -0.64253  -0.63523  -0.60712  -0.60395  -0.58215
  Beta  occ. eigenvalues --   -0.56820  -0.54835  -0.53389  -0.52576  -0.51942
  Beta  occ. eigenvalues --   -0.51730  -0.48886  -0.48606  -0.45298  -0.44448
  Beta  occ. eigenvalues --   -0.42728  -0.35598  -0.33289
  Beta virt. eigenvalues --   -0.07064  -0.01824  -0.01340  -0.00528   0.00745
  Beta virt. eigenvalues --    0.01710   0.01744   0.02060   0.02582   0.03178
  Beta virt. eigenvalues --    0.03297   0.03825   0.04475   0.04636   0.05236
  Beta virt. eigenvalues --    0.06028   0.06349   0.07003   0.07543   0.08277
  Beta virt. eigenvalues --    0.08576   0.09635   0.09833   0.10204   0.10498
  Beta virt. eigenvalues --    0.10770   0.11064   0.11263   0.11717   0.12268
  Beta virt. eigenvalues --    0.13613   0.13949   0.14207   0.14628   0.14848
  Beta virt. eigenvalues --    0.15045   0.15378   0.16519   0.16798   0.17439
  Beta virt. eigenvalues --    0.17973   0.18872   0.19344   0.20407   0.20698
  Beta virt. eigenvalues --    0.20873   0.21703   0.22703   0.23194   0.23352
  Beta virt. eigenvalues --    0.23999   0.24475   0.25410   0.25523   0.26325
  Beta virt. eigenvalues --    0.26886   0.27515   0.27754   0.27983   0.29670
  Beta virt. eigenvalues --    0.29982   0.30337   0.30532   0.31061   0.31469
  Beta virt. eigenvalues --    0.32160   0.32204   0.33199   0.34392   0.35417
  Beta virt. eigenvalues --    0.35975   0.36600   0.37279   0.37847   0.37985
  Beta virt. eigenvalues --    0.39000   0.40168   0.40692   0.41523   0.42642
  Beta virt. eigenvalues --    0.44215   0.44668   0.46142   0.46584   0.50748
  Beta virt. eigenvalues --    0.52079   0.52429   0.53663   0.58159   0.58310
  Beta virt. eigenvalues --    0.59675   0.59922   0.60438   0.61489   0.62157
  Beta virt. eigenvalues --    0.63521   0.63707   0.64286   0.64537   0.65864
  Beta virt. eigenvalues --    0.67861   0.68132   0.68969   0.70621   0.72570
  Beta virt. eigenvalues --    0.74083   0.75062   0.76479   0.77572   0.78686
  Beta virt. eigenvalues --    0.80659   0.83157   0.84630   0.85917   0.87285
  Beta virt. eigenvalues --    0.88320   0.90479   0.92459   0.93521   0.93866
  Beta virt. eigenvalues --    0.95431   0.96173   0.98517   1.01192   1.01673
  Beta virt. eigenvalues --    1.02700   1.03405   1.08894   1.09538   1.11077
  Beta virt. eigenvalues --    1.11687   1.14039   1.15029   1.15989   1.17183
  Beta virt. eigenvalues --    1.18716   1.20110   1.20780   1.21887   1.22393
  Beta virt. eigenvalues --    1.23646   1.24548   1.25268   1.25538   1.28104
  Beta virt. eigenvalues --    1.29616   1.29933   1.34593   1.41428   1.42131
  Beta virt. eigenvalues --    1.43918   1.44225   1.45511   1.48604   1.50850
  Beta virt. eigenvalues --    1.52778   1.55033   1.55497   1.59384   1.60392
  Beta virt. eigenvalues --    1.61809   1.62046   1.65687   1.67360   1.69201
  Beta virt. eigenvalues --    1.71800   1.72839   1.75197   1.77036   1.77670
  Beta virt. eigenvalues --    1.82352   1.83230   1.86625   1.88004   1.88775
  Beta virt. eigenvalues --    1.90184   1.93158   1.94327   1.96102   1.99133
  Beta virt. eigenvalues --    2.02033   2.02052   2.07717   2.12069   2.14093
  Beta virt. eigenvalues --    2.14432   2.15483   2.16950   2.19475   2.24577
  Beta virt. eigenvalues --    2.28337   2.30586   2.33122   2.39725   2.51295
  Beta virt. eigenvalues --    2.57595   2.58234   2.59365   2.64273   2.65799
  Beta virt. eigenvalues --    2.68571   2.69611   2.70326   2.73220   2.74537
  Beta virt. eigenvalues --    2.75570   2.76938   2.81840   2.84413   2.90015
  Beta virt. eigenvalues --    2.91871   2.94059   3.03106   3.05242   3.06706
  Beta virt. eigenvalues --    3.07728   3.08552   3.08586   3.09314   3.10692
  Beta virt. eigenvalues --    3.11742   3.15822   3.20047   3.20158   3.21047
  Beta virt. eigenvalues --    3.22635   3.23996   3.32585   3.35606   3.37660
  Beta virt. eigenvalues --    3.39829   3.43204   3.47351   3.48935   3.52288
  Beta virt. eigenvalues --    3.58989   3.61748   3.64568   3.72652   3.76587
  Beta virt. eigenvalues --    3.90370   3.92606   3.92792   3.95186   4.08181
  Beta virt. eigenvalues --    4.11359   4.13729   4.16739   4.19657   4.29779
  Beta virt. eigenvalues --    4.80527   5.00422   5.07547   5.08000   5.11727
  Beta virt. eigenvalues --    5.13042   5.26100   5.44790   5.45661   5.51353
  Beta virt. eigenvalues --    5.54355   5.67751   5.74011   5.83511   5.86463
  Beta virt. eigenvalues --    5.94012  10.95172  23.56377  23.88317  23.91589
  Beta virt. eigenvalues --   23.93096  24.02796  24.11372  24.18917  49.93485
  Beta virt. eigenvalues --   49.95980  50.01344  50.04081  50.09773
          Condensed to atoms (all electrons):
               1          2          3          4          5          6
     1  C   17.540378  -3.614266  -0.418820   0.682345  -5.609330  -2.342459
     2  C   -3.614266  22.458820  -2.210796  -4.030844  -0.238784  -5.101929
     3  C   -0.418820  -2.210796  16.841977  -0.315703  -4.335573  -0.201180
     4  C    0.682345  -4.030844  -0.315703  18.974612   0.601384  -8.521872
     5  C   -5.609330  -0.238784  -4.335573   0.601384  16.614129  -1.056528
     6  C   -2.342459  -5.101929  -0.201180  -8.521872  -1.056528  22.094391
     7  H   -0.281868   0.878014  -0.166900  -0.103272   0.082388  -0.040460
     8  H    0.054673   0.065117  -0.087285   0.729228  -0.083851  -0.259853
     9  C   -0.123814  -1.673413  -4.561474  -1.244187   0.420272   0.836592
    10  O    0.004857  -0.035917  -0.028744   0.067963   0.030349   0.015630
    11  H   -0.026053   0.026070   0.002410  -0.111271  -0.003570   0.018810
    12  O   -0.006697  -0.014946   0.029308   0.039141  -0.009543  -0.010191
    13  O   -0.103994   0.016622   0.017204  -0.517310   0.563991   0.114980
    14  H   -0.021317   0.008249  -0.029137   0.112386   0.186132  -0.251298
    15  O    0.301436  -0.066826   0.002445  -0.111099  -0.804714   0.787176
    16  H   -0.349685  -0.068175   0.004859   0.007285   0.184274   0.234791
    17  O    0.395824   0.339830   0.044446   0.021000  -0.054924  -0.703299
    18  H    0.153882  -0.262377  -0.025037   0.023280   0.015933   0.112653
    19  Cr   0.006697  -0.046682   0.010306   0.013982  -0.000851  -0.001195
               7          8          9         10         11         12
     1  C   -0.281868   0.054673  -0.123814   0.004857  -0.026053  -0.006697
     2  C    0.878014   0.065117  -1.673413  -0.035917   0.026070  -0.014946
     3  C   -0.166900  -0.087285  -4.561474  -0.028744   0.002410   0.029308
     4  C   -0.103272   0.729228  -1.244187   0.067963  -0.111271   0.039141
     5  C    0.082388  -0.083851   0.420272   0.030349  -0.003570  -0.009543
     6  C   -0.040460  -0.259853   0.836592   0.015630   0.018810  -0.010191
     7  H    0.460391   0.001451  -0.049954  -0.006728   0.000046   0.011594
     8  H    0.001451   0.410934  -0.093800  -0.001362  -0.014344   0.002243
     9  C   -0.049954  -0.093800  11.871120   0.186323   0.116478   0.338080
    10  O   -0.006728  -0.001362   0.186323   7.820875   0.245803  -0.110262
    11  H    0.000046  -0.014344   0.116478   0.245803   0.398416   0.007917
    12  O    0.011594   0.002243   0.338080  -0.110262   0.007917   7.998348
    13  O    0.000250  -0.039211   0.012573   0.000414   0.001059   0.000107
    14  H    0.000858   0.005404  -0.003016   0.000016  -0.000258   0.000041
    15  O   -0.001325  -0.000838  -0.002417  -0.000075  -0.000021   0.000019
    16  H   -0.000757  -0.000651  -0.000648   0.000060   0.000053   0.000005
    17  O   -0.015451   0.000346   0.003722   0.000151   0.000024   0.000221
    18  H   -0.013164   0.000900  -0.005904   0.000003  -0.000149   0.000220
    19  Cr  -0.009742   0.000264   0.013847  -0.000401   0.000914   0.032609
              13         14         15         16         17         18
     1  C   -0.103994  -0.021317   0.301436  -0.349685   0.395824   0.153882
     2  C    0.016622   0.008249  -0.066826  -0.068175   0.339830  -0.262377
     3  C    0.017204  -0.029137   0.002445   0.004859   0.044446  -0.025037
     4  C   -0.517310   0.112386  -0.111099   0.007285   0.021000   0.023280
     5  C    0.563991   0.186132  -0.804714   0.184274  -0.054924   0.015933
     6  C    0.114980  -0.251298   0.787176   0.234791  -0.703299   0.112653
     7  H    0.000250   0.000858  -0.001325  -0.000757  -0.015451  -0.013164
     8  H   -0.039211   0.005404  -0.000838  -0.000651   0.000346   0.000900
     9  C    0.012573  -0.003016  -0.002417  -0.000648   0.003722  -0.005904
    10  O    0.000414   0.000016  -0.000075   0.000060   0.000151   0.000003
    11  H    0.001059  -0.000258  -0.000021   0.000053   0.000024  -0.000149
    12  O    0.000107   0.000041   0.000019   0.000005   0.000221   0.000220
    13  O    7.849196   0.273920   0.005200   0.002730  -0.000553  -0.000320
    14  H    0.273920   0.330621   0.012941   0.000753  -0.000020  -0.000074
    15  O    0.005200   0.012941   7.777060   0.261351  -0.000988   0.003580
    16  H    0.002730   0.000753   0.261351   0.312251   0.017194   0.000234
    17  O   -0.000553  -0.000020  -0.000988   0.017194   7.966917   0.269844
    18  H   -0.000320  -0.000074   0.003580   0.000234   0.269844   0.341294
    19  Cr   0.000018  -0.000004   0.000015  -0.000004  -0.000175   0.000522
              19
     1  C    0.006697
     2  C   -0.046682
     3  C    0.010306
     4  C    0.013982
     5  C   -0.000851
     6  C   -0.001195
     7  H   -0.009742
     8  H    0.000264
     9  C    0.013847
    10  O   -0.000401
    11  H    0.000914
    12  O    0.032609
    13  O    0.000018
    14  H   -0.000004
    15  O    0.000015
    16  H   -0.000004
    17  O   -0.000175
    18  H    0.000522
    19  Cr  12.069064
          Atomic-Atomic Spin Densities.
               1          2          3          4          5          6
     1  C    0.231866  -0.453720  -0.006981   0.094927   0.039629  -0.063273
     2  C   -0.453720   2.405721  -0.769363  -1.017297  -0.088702  -0.057923
     3  C   -0.006981  -0.769363   1.389758  -0.026816  -0.230720  -0.051612
     4  C    0.094927  -1.017297  -0.026816   0.962354   0.286179  -0.069669
     5  C    0.039629  -0.088702  -0.230720   0.286179  -0.078944  -0.196000
     6  C   -0.063273  -0.057923  -0.051612  -0.069669  -0.196000  -0.043802
     7  H   -0.030068   0.142197  -0.073810  -0.039678   0.000700  -0.010879
     8  H   -0.009928   0.018778  -0.002503  -0.007596   0.020604  -0.001338
     9  C    0.135747  -0.156457  -0.493092  -0.058343  -0.007695   0.080627
    10  O    0.014313  -0.023529  -0.037289   0.013264  -0.014419  -0.000664
    11  H    0.003264   0.000037  -0.003798  -0.012963  -0.010859   0.001597
    12  O   -0.032816   0.088535   0.056739  -0.032361   0.006070  -0.006300
    13  O   -0.002513  -0.002401   0.001491   0.014665   0.069187  -0.007777
    14  H    0.000241   0.001520  -0.001850   0.003422   0.002044  -0.004887
    15  O   -0.016611   0.002985   0.001204  -0.006193   0.022302   0.110712
    16  H   -0.001392  -0.006981   0.002510  -0.000410  -0.000255   0.006975
    17  O    0.022254  -0.002018  -0.000225   0.000789  -0.000831   0.007702
    18  H    0.001336  -0.003222   0.004513   0.002182  -0.000177  -0.002110
    19  Cr  -0.006720  -0.013971   0.022436   0.006434   0.001954  -0.000825
               7          8          9         10         11         12
     1  C   -0.030068  -0.009928   0.135747   0.014313   0.003264  -0.032816
     2  C    0.142197   0.018778  -0.156457  -0.023529   0.000037   0.088535
     3  C   -0.073810  -0.002503  -0.493092  -0.037289  -0.003798   0.056739
     4  C   -0.039678  -0.007596  -0.058343   0.013264  -0.012963  -0.032361
     5  C    0.000700   0.020604  -0.007695  -0.014419  -0.010859   0.006070
     6  C   -0.010879  -0.001338   0.080627  -0.000664   0.001597  -0.006300
     7  H    0.021029   0.001400  -0.026923  -0.001397  -0.000886   0.025126
     8  H    0.001400  -0.000474  -0.019240  -0.000527  -0.001775   0.001324
     9  C   -0.026923  -0.019240   0.654526   0.047147   0.024863  -0.168629
    10  O   -0.001397  -0.000527   0.047147   0.014394   0.000683  -0.011192
    11  H   -0.000886  -0.001775   0.024863   0.000683   0.005650  -0.005027
    12  O    0.025126   0.001324  -0.168629  -0.011192  -0.005027   0.111761
    13  O   -0.000129  -0.000215  -0.000231   0.000056   0.000043  -0.000020
    14  H    0.000015   0.000490  -0.000666  -0.000060  -0.000100   0.000035
    15  O    0.000317  -0.000220   0.000241   0.000007   0.000013   0.000022
    16  H   -0.000427  -0.000101   0.000514   0.000014   0.000017  -0.000030
    17  O    0.000826   0.000068  -0.001804  -0.000008  -0.000016   0.000223
    18  H   -0.001052   0.000003  -0.001086  -0.000029  -0.000018  -0.000531
    19  Cr  -0.000982  -0.000083   0.001214   0.002364   0.000101  -0.059449
              13         14         15         16         17         18
     1  C   -0.002513   0.000241  -0.016611  -0.001392   0.022254   0.001336
     2  C   -0.002401   0.001520   0.002985  -0.006981  -0.002018  -0.003222
     3  C    0.001491  -0.001850   0.001204   0.002510  -0.000225   0.004513
     4  C    0.014665   0.003422  -0.006193  -0.000410   0.000789   0.002182
     5  C    0.069187   0.002044   0.022302  -0.000255  -0.000831  -0.000177
     6  C   -0.007777  -0.004887   0.110712   0.006975   0.007702  -0.002110
     7  H   -0.000129   0.000015   0.000317  -0.000427   0.000826  -0.001052
     8  H   -0.000215   0.000490  -0.000220  -0.000101   0.000068   0.000003
     9  C   -0.000231  -0.000666   0.000241   0.000514  -0.001804  -0.001086
    10  O    0.000056  -0.000060   0.000007   0.000014  -0.000008  -0.000029
    11  H    0.000043  -0.000100   0.000013   0.000017  -0.000016  -0.000018
    12  O   -0.000020   0.000035   0.000022  -0.000030   0.000223  -0.000531
    13  O   -0.184155  -0.000270  -0.005440   0.000173  -0.000061   0.000010
    14  H   -0.000270   0.003871   0.000565  -0.000079   0.000001   0.000027
    15  O   -0.005440   0.000565  -0.311427  -0.001228  -0.003384   0.000066
    16  H    0.000173  -0.000079  -0.001228   0.006316  -0.000029  -0.000012
    17  O   -0.000061   0.000001  -0.003384  -0.000029  -0.060532  -0.000390
    18  H    0.000010   0.000027   0.000066  -0.000012  -0.000390   0.001779
    19  Cr   0.000001   0.000002   0.000005   0.000004   0.000011   0.000106
              19
     1  C   -0.006720
     2  C   -0.013971
     3  C    0.022436
     4  C    0.006434
     5  C    0.001954
     6  C   -0.000825
     7  H   -0.000982
     8  H   -0.000083
     9  C    0.001214
    10  O    0.002364
    11  H    0.000101
    12  O   -0.059449
    13  O    0.000001
    14  H    0.000002
    15  O    0.000005
    16  H    0.000004
    17  O    0.000011
    18  H    0.000106
    19  Cr   4.017132
 Mulliken charges and spin densities:
               1          2
     1  C   -0.241789  -0.080443
     2  C   -0.427769   0.064188
     3  C    1.427695  -0.219406
     4  C   -0.317048   0.112889
     5  C   -0.501184  -0.179934
     6  C    0.275240  -0.309444
     7  H    0.254630   0.005380
     8  H    0.310637  -0.001334
     9  C   -0.040383   0.010712
    10  O   -0.188958   0.003128
    11  H    0.337667   0.000826
    12  O   -0.308212  -0.026519
    13  O   -0.196878  -0.117586
    14  H    0.373804   0.004322
    15  O   -0.162919  -0.206063
    16  H    0.394081   0.005579
    17  O   -0.284109  -0.037423
    18  H    0.384679   0.001396
    19  Cr   1.910815   3.969732
 Sum of Mulliken charges =   3.00000   3.00000
 Mulliken charges and spin densities with hydrogens summed into heavy atoms:
               1          2
     1  C   -0.241789  -0.080443
     2  C   -0.173139   0.069568
     3  C    1.427695  -0.219406
     4  C   -0.006411   0.111556
     5  C   -0.501184  -0.179934
     6  C    0.275240  -0.309444
     9  C   -0.040383   0.010712
    10  O    0.148709   0.003953
    12  O   -0.308212  -0.026519
    13  O    0.176926  -0.113264
    15  O    0.231161  -0.200485
    17  O    0.100569  -0.036027
    19  Cr   1.910815   3.969732
 Electronic spatial extent (au):  <R**2>=           3219.3097
 Charge=              3.0000 electrons
 Dipole moment (field-independent basis, Debye):
    X=             22.2133    Y=             -8.9816    Z=             -1.2342  Tot=             23.9921
 Quadrupole moment (field-independent basis, Debye-Ang):
   XX=             98.2992   YY=            -42.4398   ZZ=            -71.7048
   XY=            -22.5030   XZ=             -8.2579   YZ=              1.7456
 Traceless Quadrupole moment (field-independent basis, Debye-Ang):
   XX=            103.5810   YY=            -37.1580   ZZ=            -66.4230
   XY=            -22.5030   XZ=             -8.2579   YZ=              1.7456
 Octapole moment (field-independent basis, Debye-Ang**2):
  XXX=            501.7943  YYY=            -47.9360  ZZZ=             -8.1359  XYY=             32.3045
  XXY=           -146.4220  XXZ=            -52.8101  XZZ=             43.7878  YZZ=             -7.5585
  YYZ=              9.4463  XYZ=              6.2917
 Hexadecapole moment (field-independent basis, Debye-Ang**3):
 XXXX=            234.3141 YYYY=           -705.1869 ZZZZ=            -98.8917 XXXY=           -418.6910
 XXXZ=           -144.3435 YYYX=            -42.6450 YYYZ=             11.7424 ZZZX=            -30.0000
 ZZZY=              9.9330 XXYY=           -487.1708 XXZZ=           -443.7620 YYZZ=           -168.3442
 XXYZ=             20.0784 YYXZ=            -17.1966 ZZXY=            -26.1912
 N-N= 8.300768824513D+02 E-N=-3.321178391472D+03  KE= 6.881312100385D+02
                          Isotropic Fermi Contact Couplings
        Atom                 a.u.       MegaHertz       Gauss      10(-4) cm-1
     1  C(13)              0.00358       1.33994       0.47812       0.44696
     2  C(13)              0.01363       5.10590       1.82191       1.70314
     3  C(13)             -0.02999     -11.23743      -4.00980      -3.74840
     4  C(13)              0.02460       9.21926       3.28966       3.07521
     5  C(13)             -0.01487      -5.57225      -1.98832      -1.85870
     6  C(13)             -0.03186     -11.93770      -4.25967      -3.98199
     7  H(1)              -0.00009      -0.13886      -0.04955      -0.04632
     8  H(1)              -0.00085      -1.26279      -0.45060      -0.42122
     9  C(13)              0.02630       9.85446       3.51632       3.28710
    10  O(17)              0.00367      -0.74239      -0.26490      -0.24763
    11  H(1)               0.00007       0.10331       0.03686       0.03446
    12  O(17)              0.07871     -15.90361      -5.67481      -5.30487
    13  O(17)             -0.03024       6.10969       2.18009       2.03797
    14  H(1)               0.00212       3.16500       1.12935       1.05573
    15  O(17)             -0.05111      10.32690       3.68490       3.44468
    16  H(1)               0.00367       5.47238       1.95268       1.82539
    17  O(17)             -0.00714       1.44263       0.51477       0.48121
    18  H(1)               0.00092       1.36453       0.48690       0.45516
    19  Cr(53)            -0.00001       0.00067       0.00024       0.00022
 --------------------------------------------------------
       Center         ----  Spin Dipole Couplings  ----
                      3XX-RR        3YY-RR        3ZZ-RR
 --------------------------------------------------------
     1   Atom        0.045896      0.026214     -0.072110
     2   Atom       -0.002569     -0.023196      0.025765
     3   Atom        0.128923      0.118660     -0.247584
     4   Atom       -0.042794     -0.044621      0.087415
     5   Atom        0.122977      0.098004     -0.220982
     6   Atom        0.188383      0.181796     -0.370179
     7   Atom        0.023562     -0.015440     -0.008122
     8   Atom       -0.002826      0.001217      0.001609
     9   Atom        0.005250     -0.009995      0.004746
    10   Atom       -0.005462      0.007226     -0.001764
    11   Atom        0.002584     -0.000340     -0.002244
    12   Atom        0.140399      0.102603     -0.243003
    13   Atom        0.296468      0.294901     -0.591369
    14   Atom       -0.012654      0.000731      0.011923
    15   Atom        0.526133      0.473324     -0.999457
    16   Atom        0.030866     -0.045508      0.014642
    17   Atom        0.100227      0.097107     -0.197333
    18   Atom        0.001181     -0.002135      0.000954
    19   Atom        0.926063      0.058837     -0.984900
 --------------------------------------------------------
                        XY            XZ            YZ
 --------------------------------------------------------
     1   Atom        0.013396      0.011104     -0.010299
     2   Atom        0.000091     -0.009107      0.009106
     3   Atom       -0.004554      0.049972     -0.044874
     4   Atom       -0.010568     -0.018011      0.018832
     5   Atom        0.009832      0.041294     -0.042152
     6   Atom        0.003927      0.070674     -0.067967
     7   Atom        0.009451     -0.008492     -0.000570
     8   Atom       -0.005799     -0.001024      0.000071
     9   Atom       -0.033189     -0.009093     -0.001687
    10   Atom       -0.019063      0.011919      0.007216
    11   Atom       -0.009331     -0.002740      0.001483
    12   Atom       -0.053432     -0.072204      0.047572
    13   Atom       -0.002847      0.116044     -0.120315
    14   Atom       -0.013563     -0.001710     -0.000215
    15   Atom        0.027794      0.188367     -0.170187
    16   Atom       -0.004068      0.001917      0.006330
    17   Atom        0.014024      0.028714     -0.031533
    18   Atom        0.013405     -0.003050      0.001013
    19   Atom       -1.428169     -0.329797      0.250083
 --------------------------------------------------------


 ---------------------------------------------------------------------------------
              Anisotropic Spin Dipole Couplings in Principal Axis System
 ---------------------------------------------------------------------------------

       Atom             a.u.   MegaHertz   Gauss  10(-4) cm-1        Axes

              Baa    -0.0745    -9.994    -3.566    -3.334 -0.1039  0.1149  0.9879
     1 C(13)  Bbb     0.0216     2.894     1.033     0.965 -0.4241  0.8934 -0.1485
              Bcc     0.0529     7.100     2.533     2.368  0.8996  0.4344  0.0441
 
              Baa    -0.0250    -3.351    -1.196    -1.118 -0.0813  0.9784 -0.1902
     2 C(13)  Bbb    -0.0049    -0.658    -0.235    -0.219  0.9605  0.1278  0.2473
              Bcc     0.0299     4.009     1.430     1.337 -0.2662  0.1626  0.9501
 
              Baa    -0.2592   -34.783   -12.412   -11.602 -0.1255  0.1155  0.9853
     3 C(13)  Bbb     0.1178    15.808     5.641     5.273  0.5113  0.8586 -0.0355
              Bcc     0.1414    18.975     6.771     6.329  0.8502 -0.4994  0.1668
 
              Baa    -0.0543    -7.292    -2.602    -2.432  0.6618  0.7495 -0.0155
     4 C(13)  Bbb    -0.0385    -5.161    -1.842    -1.722  0.7362 -0.6459  0.2020
              Bcc     0.0928    12.454     4.444     4.154 -0.1414  0.1451  0.9793
 
              Baa    -0.2315   -31.063   -11.084   -10.362 -0.1183  0.1295  0.9845
     5 C(13)  Bbb     0.1027    13.784     4.918     4.598 -0.1700  0.9742 -0.1485
              Bcc     0.1288    17.280     6.166     5.764  0.9783  0.1849  0.0932
 
              Baa    -0.3871   -51.944   -18.535   -17.327 -0.1218  0.1186  0.9854
     6 C(13)  Bbb     0.1878    25.198     8.991     8.405  0.4394  0.8967 -0.0536
              Bcc     0.1993    26.746     9.544     8.921  0.8900 -0.4265  0.1613
 
              Baa    -0.0178    -9.515    -3.395    -3.174 -0.2514  0.9539 -0.1639
     7 H(1)   Bbb    -0.0099    -5.267    -1.879    -1.757  0.1835  0.2132  0.9596
              Bcc     0.0277    14.782     5.275     4.931  0.9503  0.2112 -0.2286
 
              Baa    -0.0070    -3.745    -1.336    -1.249  0.8146  0.5727  0.0919
     8 H(1)   Bbb     0.0016     0.838     0.299     0.279  0.0237 -0.1913  0.9812
              Bcc     0.0054     2.907     1.037     0.970 -0.5796  0.7971  0.1694
 
              Baa    -0.0376    -5.045    -1.800    -1.683  0.6257  0.7625  0.1647
     9 C(13)  Bbb     0.0046     0.614     0.219     0.205  0.0663 -0.2624  0.9627
              Bcc     0.0330     4.430     1.581     1.478  0.7773 -0.5914 -0.2147
 
              Baa    -0.0269     1.946     0.694     0.649  0.7163  0.5026 -0.4841
    10 O(17)  Bbb     0.0059    -0.423    -0.151    -0.141  0.3546  0.3353  0.8728
              Bcc     0.0210    -1.523    -0.543    -0.508 -0.6010  0.7969 -0.0620
 
              Baa    -0.0084    -4.481    -1.599    -1.495  0.6597  0.7428  0.1147
    11 H(1)   Bbb    -0.0029    -1.525    -0.544    -0.509  0.0917 -0.2310  0.9686
              Bcc     0.0113     6.006     2.143     2.003  0.7459 -0.6285 -0.2205
 
              Baa    -0.2601    18.818     6.715     6.277  0.1629 -0.1047  0.9811
    12 O(17)  Bbb     0.0648    -4.692    -1.674    -1.565  0.5725  0.8198 -0.0076
              Bcc     0.1952   -14.126    -5.041    -4.712  0.8035 -0.5629 -0.1935
 
              Baa    -0.6217    44.988    16.053    15.006 -0.1239  0.1288  0.9839
    13 O(17)  Bbb     0.2928   -21.190    -7.561    -7.068  0.7030  0.7111 -0.0045
              Bcc     0.3289   -23.798    -8.492    -7.938  0.7003 -0.6912  0.1787
 
              Baa    -0.0212   -11.290    -4.029    -3.766  0.8489  0.5264  0.0473
    14 H(1)   Bbb     0.0090     4.797     1.712     1.600 -0.5032  0.8323 -0.2325
              Bcc     0.0122     6.493     2.317     2.166 -0.1618  0.1735  0.9715
 
              Baa    -1.0420    75.396    26.903    25.149 -0.1205  0.1130  0.9863
    15 O(17)  Bbb     0.4921   -35.605   -12.705   -11.877 -0.1074  0.9862 -0.1261
              Bcc     0.5499   -39.791   -14.198   -13.273  0.9869  0.1211  0.1067
 
              Baa    -0.0464   -24.757    -8.834    -8.258  0.0549  0.9930 -0.1047
    16 H(1)   Bbb     0.0152     8.090     2.887     2.699 -0.0924  0.1095  0.9897
              Bcc     0.0312    16.667     5.947     5.559  0.9942 -0.0446  0.0978
 
              Baa    -0.2036    14.736     5.258     4.915 -0.0985  0.1083  0.9892
    17 O(17)  Bbb     0.0909    -6.575    -2.346    -2.193 -0.6579  0.7388 -0.1464
              Bcc     0.1128    -8.161    -2.912    -2.722  0.7467  0.6652  0.0015
 
              Baa    -0.0145    -7.730    -2.758    -2.578 -0.6595  0.7303 -0.1782
    18 H(1)   Bbb     0.0012     0.662     0.236     0.221 -0.0179  0.2217  0.9749
              Bcc     0.0132     7.068     2.522     2.358  0.7515  0.6462 -0.1332
 
              Baa    -1.0420    31.487    11.235    10.503  0.0457 -0.1645  0.9853
    19 Cr(53) Bbb    -0.9996    30.208    10.779    10.076  0.6039  0.7903  0.1040
              Bcc     2.0416   -61.695   -22.014   -20.579  0.7958 -0.5903 -0.1355
 

 ---------------------------------------------------------------------------------

 No NMR shielding tensors so no spin-rotation constants.
 Leave Link  601 at Wed May 24 01:16:12 2023, MaxMem=  2684354560 cpu:               2.1 elap:               0.2
 (Enter /home/xut/apps/g16/l701.exe)
 ... and contract with generalized density number  0.
 Compute integral first derivatives.
   1 Symmetry operations used in ECPInt.
 ECPInt:  NShTT=    6105 NPrTT=   23469 LenC2=    5788 LenP2D=   15737.
 LDataN:  DoStor=T MaxTD1= 5 Len=  102
 D1PCM: PCM CHGder 1st derivatives, ID1Alg=3 FixD1E=F DoIter=F DoCFld=F I1PDM=0.
 GePol: Maximum number of non-zero 1st derivatives   =     186
 Leave Link  701 at Wed May 24 01:16:14 2023, MaxMem=  2684354560 cpu:              11.4 elap:               1.2
 (Enter /home/xut/apps/g16/l702.exe)
 L702 exits ... SP integral derivatives will be done elsewhere.
 Leave Link  702 at Wed May 24 01:16:14 2023, MaxMem=  2684354560 cpu:               0.2 elap:               0.0
 (Enter /home/xut/apps/g16/l703.exe)
 Integral derivatives from FoFJK, PRISM(SPDF).
 Compute integral first derivatives, UseDBF=F ICtDFT=           0.
 Calling FoFJK, ICntrl=      2127 FMM=F ISym2X=0 I1Cent= 0 IOpClX= 1 NMat=1 NMatS=1 NMatT=0.
 FoFJK:  IHMeth= 1 ICntrl=    2127 DoSepK=F KAlg= 0 I1Cent=           0 FoldK=F
 IRaf=         0 NMat=       1 IRICut=       1 DoRegI=T DoRafI=F ISym2E= 0 IDoP0=0 IntGTp=1.
 FoFCou: FMM=F IPFlag=           0 FMFlag=      100000 FMFlg1=         800
         NFxFlg=           0 DoJE=F BraDBF=F KetDBF=F FulRan=T
         wScrn=  0.000000 ICntrl=      2127 IOpCl=  1 I1Cent=           0 NGrid=           0
         NMat0=    1 NMatS0=      1 NMatT0=    0 NMatD0=    1 NMtDS0=    0 NMtDT0=    0
 Symmetry not used in FoFCou.
 Leave Link  703 at Wed May 24 01:16:25 2023, MaxMem=  2684354560 cpu:             110.2 elap:              11.1
 (Enter /home/xut/apps/g16/l716.exe)
 Dipole        = 8.73938268D+00-3.53362389D+00-4.85564953D-01
 ***** Axes restored to original set *****
 -------------------------------------------------------------------
 Center     Atomic                   Forces (Hartrees/Bohr)
 Number     Number              X              Y              Z
 -------------------------------------------------------------------
      1        6           0.016417735   -0.051965784    0.002422647
      2        6          -0.020455295   -0.011641330    0.000723383
      3        6          -0.011240049    0.013664926   -0.001495571
      4        6           0.006287845    0.001736022   -0.001302329
      5        6           0.006446239    0.067800309   -0.003808339
      6        6          -0.080088795   -0.008063905    0.001125742
      7        1          -0.000487412    0.000029126   -0.000012689
      8        1          -0.001817661   -0.000186138   -0.000206360
      9        6           0.021875379    0.018912857    0.006828631
     10        8          -0.009925225   -0.016527155   -0.005055779
     11        1           0.000850255    0.002196547    0.001034156
     12        8          -0.021141834    0.022116478    0.005814741
     13        8           0.021557816   -0.034605340    0.001826643
     14        1          -0.005873520    0.001749831   -0.000176358
     15        8           0.057929162    0.005269195   -0.000668226
     16        1          -0.004751129   -0.008302002    0.000659237
     17        8           0.008714145    0.023513436   -0.001008297
     18        1           0.001127336   -0.003347706    0.000149166
     19       24           0.014575009   -0.022349366   -0.006850396
 -------------------------------------------------------------------
 Cartesian Forces:  Max     0.080088795 RMS     0.020461291
 Leave Link  716 at Wed May 24 01:16:25 2023, MaxMem=  2684354560 cpu:               0.3 elap:               0.0
 (Enter /home/xut/apps/g16/l103.exe)

 GradGradGradGradGradGradGradGradGradGradGradGradGradGradGradGradGradGrad
 Berny optimization.
 FormGI is forming the generalized inverse of G from B-inverse, IUseBI=4.
 Internal  Forces:  Max     0.053261476 RMS     0.010660338
 Search for a local minimum.
 Step number   1 out of a maximum of   92
 All quantities printed in internal units (Hartrees-Bohrs-Radians)
 RMS Force = .10660D-01 SwitMx=.10000D-02 MixMth= 1
 Mixed Optimization -- RFO/linear search
 Second derivative matrix not updated -- first step.
 ITU=  0
     Eigenvalues ---    0.00939   0.01316   0.01316   0.01412   0.01788
     Eigenvalues ---    0.02150   0.02156   0.02159   0.02165   0.02190
     Eigenvalues ---    0.02192   0.02208   0.02210   0.02224   0.02226
     Eigenvalues ---    0.02241   0.02457   0.12270   0.15990   0.15999
     Eigenvalues ---    0.16000   0.16000   0.16000   0.16000   0.23488
     Eigenvalues ---    0.23492   0.24992   0.24999   0.25000   0.25000
     Eigenvalues ---    0.25000   0.25000   0.25000   0.33790   0.35514
     Eigenvalues ---    0.35575   0.42490   0.43148   0.46380   0.46465
     Eigenvalues ---    0.47078   0.48063   0.51966   0.52009   0.53020
     Eigenvalues ---    0.53819   0.53931   0.53951   0.54210   0.56728
     Eigenvalues ---    0.99392
 RFO step:  Lambda=-2.31596720D-02 EMin= 9.39035042D-03
 Linear search not attempted -- first point.
 Iteration  1 RMS(Cart)=  0.04741794 RMS(Int)=  0.00191334
 Iteration  2 RMS(Cart)=  0.00362844 RMS(Int)=  0.00006647
 Iteration  3 RMS(Cart)=  0.00001648 RMS(Int)=  0.00006505
 Iteration  4 RMS(Cart)=  0.00000000 RMS(Int)=  0.00006505
 ITry= 1 IFail=0 DXMaxC= 2.30D-01 DCOld= 1.00D+10 DXMaxT= 3.00D-01 DXLimC= 3.00D+00 Rises=F
 Variable       Old X    -DE/DX   Delta X   Delta X   Delta X     New X
                                 (Linear)    (Quad)   (Total)
    R1        2.61649  -0.01631   0.00000  -0.03282  -0.03277   2.58372
    R2        2.63770   0.02543   0.00000   0.05397   0.05391   2.69162
    R3        2.57932  -0.02214   0.00000  -0.04079  -0.04079   2.53853
    R4        2.63854   0.01966   0.00000   0.03816   0.03827   2.67681
    R5        2.04752  -0.00027   0.00000  -0.00071  -0.00071   2.04681
    R6        2.63639  -0.00291   0.00000  -0.00768  -0.00762   2.62877
    R7        2.80986   0.00593   0.00000   0.01643   0.01643   2.82629
    R8        2.62171  -0.00534   0.00000  -0.01006  -0.01011   2.61160
    R9        2.04848  -0.00102   0.00000  -0.00269  -0.00269   2.04579
   R10        2.63335   0.03830   0.00000   0.08040   0.08029   2.71364
   R11        2.57890  -0.03639   0.00000  -0.06699  -0.06699   2.51191
   R12        2.56935  -0.05326   0.00000  -0.09625  -0.09625   2.47310
   R13        2.53628  -0.01743   0.00000  -0.02953  -0.02953   2.50676
   R14        2.28883  -0.00275   0.00000  -0.00270  -0.00270   2.28613
   R15        1.82794   0.00150   0.00000   0.00267   0.00267   1.83061
   R16        3.89019   0.02752   0.00000   0.18868   0.18868   4.07887
   R17        1.82777   0.00552   0.00000   0.00981   0.00981   1.83758
   R18        1.82897   0.00951   0.00000   0.01694   0.01694   1.84590
   R19        1.82541   0.00340   0.00000   0.00601   0.00601   1.83142
    A1        2.10173  -0.00763   0.00000  -0.02573  -0.02574   2.07599
    A2        2.16847   0.00951   0.00000   0.03371   0.03371   2.20219
    A3        2.01298  -0.00188   0.00000  -0.00798  -0.00798   2.00500
    A4        2.08267   0.00221   0.00000   0.00347   0.00363   2.08629
    A5        2.09099  -0.00154   0.00000  -0.00413  -0.00421   2.08678
    A6        2.10947  -0.00067   0.00000   0.00064   0.00056   2.11003
    A7        2.10772   0.01210   0.00000   0.03740   0.03756   2.14528
    A8        2.04415  -0.00662   0.00000  -0.02079  -0.02087   2.02328
    A9        2.13103  -0.00548   0.00000  -0.01658  -0.01666   2.11437
   A10        2.08286  -0.00415   0.00000  -0.01894  -0.01894   2.06391
   A11        2.14399   0.00362   0.00000   0.01796   0.01795   2.16194
   A12        2.05580   0.00054   0.00000   0.00118   0.00117   2.05697
   A13        2.10069  -0.00397   0.00000  -0.00904  -0.00921   2.09148
   A14        2.08140   0.00204   0.00000   0.00473   0.00481   2.08621
   A15        2.10106   0.00193   0.00000   0.00434   0.00442   2.10548
   A16        2.09061   0.00144   0.00000   0.01274   0.01257   2.10318
   A17        2.13612   0.00032   0.00000  -0.00257  -0.00248   2.13364
   A18        2.05644  -0.00176   0.00000  -0.01017  -0.01008   2.04636
   A19        2.06583   0.00634   0.00000   0.02320   0.02314   2.08897
   A20        2.15029  -0.00835   0.00000  -0.03057  -0.03063   2.11967
   A21        2.06706   0.00201   0.00000   0.00738   0.00732   2.07437
   A22        1.96545   0.00378   0.00000   0.02062   0.02062   1.98608
   A23        1.91298   0.00485   0.00000   0.02648   0.02648   1.93946
   A24        1.91640   0.00205   0.00000   0.01120   0.01120   1.92760
   A25        1.92400   0.00175   0.00000   0.00953   0.00953   1.93354
   A26        3.15711   0.00219   0.00000   0.06023   0.06023   3.21735
   A27        3.12500   0.00423   0.00000   0.11637   0.11637   3.24137
    D1        0.00945  -0.00003   0.00000   0.00052   0.00042   0.00987
    D2        3.13992  -0.00015   0.00000  -0.00219  -0.00227   3.13765
    D3       -3.13502  -0.00003   0.00000   0.00031   0.00024  -3.13478
    D4       -0.00455  -0.00014   0.00000  -0.00240  -0.00245  -0.00700
    D5        0.00121   0.00019   0.00000   0.00470   0.00465   0.00586
    D6        3.13761   0.00025   0.00000   0.00562   0.00563  -3.13995
    D7       -3.13775   0.00017   0.00000   0.00482   0.00474  -3.13301
    D8       -0.00135   0.00022   0.00000   0.00574   0.00571   0.00436
    D9       -0.03366  -0.00007   0.00000  -0.00144  -0.00146  -0.03511
   D10        3.10519  -0.00007   0.00000  -0.00167  -0.00166   3.10353
   D11       -0.01546  -0.00045   0.00000  -0.00811  -0.00817  -0.02363
   D12       -3.13218  -0.00040   0.00000  -0.00900  -0.00903  -3.14121
   D13        3.13738  -0.00033   0.00000  -0.00534  -0.00542   3.13196
   D14        0.02066  -0.00028   0.00000  -0.00623  -0.00628   0.01439
   D15        0.01063   0.00043   0.00000   0.00944   0.00945   0.02008
   D16       -3.09456   0.00018   0.00000   0.00295   0.00297  -3.09160
   D17        3.12608   0.00037   0.00000   0.01037   0.01035   3.13644
   D18        0.02089   0.00013   0.00000   0.00388   0.00387   0.02476
   D19       -2.78966   0.00086   0.00000   0.02248   0.02237  -2.76729
   D20        0.35268   0.00007   0.00000   0.00137   0.00143   0.35411
   D21        0.37716   0.00065   0.00000   0.02075   0.02070   0.39786
   D22       -2.76368  -0.00014   0.00000  -0.00035  -0.00025  -2.76393
   D23        0.00024  -0.00018   0.00000  -0.00386  -0.00379  -0.00355
   D24       -3.13288  -0.00035   0.00000  -0.00763  -0.00757  -3.14045
   D25        3.10726   0.00012   0.00000   0.00268   0.00269   3.10995
   D26       -0.02586  -0.00005   0.00000  -0.00109  -0.00109  -0.02695
   D27       -0.00612  -0.00013   0.00000  -0.00312  -0.00309  -0.00921
   D28        3.14043  -0.00019   0.00000  -0.00402  -0.00403   3.13640
   D29        3.12690   0.00004   0.00000   0.00069   0.00074   3.12764
   D30       -0.00973  -0.00002   0.00000  -0.00021  -0.00021  -0.00993
   D31       -3.13844   0.00011   0.00000   0.00258   0.00260  -3.13584
   D32        0.01163  -0.00004   0.00000  -0.00113  -0.00115   0.01048
   D33       -0.00747   0.00022   0.00000   0.00507   0.00505  -0.00241
   D34        3.12902   0.00028   0.00000   0.00604   0.00606   3.13509
   D35        0.13595  -0.00008   0.00000  -0.00400  -0.00416   0.13179
   D36       -3.00636   0.00066   0.00000   0.01607   0.01623  -2.99014
         Item               Value     Threshold  Converged?
 Maximum Force            0.053261     0.000450     NO 
 RMS     Force            0.010660     0.000300     NO 
 Maximum Displacement     0.230426     0.001800     NO 
 RMS     Displacement     0.049593     0.001200     NO 
 Predicted change in Energy=-1.264410D-02
 Lowest energy point so far.  Saving SCF results.
 GradGradGradGradGradGradGradGradGradGradGradGradGradGradGradGradGradGrad

 Leave Link  103 at Wed May 24 01:16:25 2023, MaxMem=  2684354560 cpu:               0.3 elap:               0.1
 (Enter /home/xut/apps/g16/l202.exe)
                          Input orientation:                          
 ---------------------------------------------------------------------
 Center     Atomic      Atomic             Coordinates (Angstroms)
 Number     Number       Type             X           Y           Z
 ---------------------------------------------------------------------
      1          6           0       -1.301013   -0.838860    0.212975
      2          6           0        0.065914   -0.839463    0.183479
      3          6           0        0.763899    0.392243    0.136535
      4          6           0        0.120213    1.624602    0.090927
      5          6           0       -1.261441    1.642330    0.116127
      6          6           0       -1.990614    0.407063    0.183309
      7          1           0        0.600584   -1.781070    0.209325
      8          1           0        0.636855    2.572498    0.009866
      9          6           0        2.256190    0.297420    0.106254
     10          8           0        2.988395    1.336659    0.485078
     11          1           0        2.471116    2.059760    0.869736
     12          8           0        2.817276   -0.717555   -0.238050
     13          8           0       -1.902656    2.805871    0.072372
     14          1           0       -2.865954    2.676451    0.101969
     15          8           0       -3.296829    0.483058    0.210613
     16          1           0       -3.689810   -0.410342    0.250113
     17          8           0       -2.093468   -1.922278    0.265513
     18          1           0       -1.566105   -2.735208    0.248875
     19         24           0        4.006939   -2.465486   -0.672013
 ---------------------------------------------------------------------
                    Distance matrix (angstroms):
                    1          2          3          4          5
     1  C    0.000000
     2  C    1.367246   0.000000
     3  C    2.405269   1.416505   0.000000
     4  C    2.846652   2.466400   1.391086   0.000000
     5  C    2.483394   2.815263   2.380155   1.381998   0.000000
     6  C    1.424343   2.404815   2.754950   2.438550   1.435998
     7  H    2.122227   1.083127   2.180655   3.441421   3.898139
     8  H    3.928607   3.463754   2.187623   1.082588   2.116609
     9  C    3.735802   2.468962   1.495608   2.514766   3.765981
    10  O    4.817255   3.656140   2.441677   2.909421   4.276759
    11  H    4.802322   3.829026   2.496555   2.514488   3.830687
    12  O    4.144689   2.786134   2.363963   3.587210   4.725509
    13  O    3.696729   4.144403   3.597253   2.342593   1.329248
    14  H    3.849516   4.578662   4.288896   3.166023   1.908944
    15  O    2.393900   3.613564   4.062419   3.604668   2.344279
    16  H    2.427212   3.780747   4.526871   4.322339   3.182513
    17  O    1.343331   2.417053   3.679427   4.184641   3.663470
    18  H    1.915123   2.502321   3.901601   4.677239   4.390134
    19  Cr   5.621697   4.348275   4.397462   5.693640   6.726897
                    6          7          8          9         10
     6  C    0.000000
     7  H    3.391594   0.000000
     8  H    3.409220   4.358285   0.000000
     9  C    4.248918   2.659281   2.794193   0.000000
    10  O    5.074026   3.936739   2.698678   1.326518   0.000000
    11  H    4.807247   4.322847   2.089687   1.932599   0.968718
    12  O    4.955614   2.498986   3.954762   1.209767   2.184488
    13  O    2.402983   5.227332   2.550977   4.856900   5.123601
    14  H    2.433713   5.647823   3.505561   5.647669   6.017908
    15  O    1.308709   4.507340   4.458692   5.557102   6.348859
    16  H    1.886765   4.504225   5.260711   5.989703   6.906927
    17  O    2.333059   2.698335   5.265266   4.885892   6.041043
    18  H    3.171494   2.367802   5.751687   4.881302   6.113866
    19  Cr   6.704756   3.584471   6.099484   3.362212   4.102755
                   11         12         13         14         15
    11  H    0.000000
    12  O    3.010065   0.000000
    13  O    4.508032   5.898190   0.000000
    14  H    5.427162   6.628272   0.972404   0.000000
    15  O    6.015782   6.247004   2.712617   2.237952   0.000000
    16  H    6.666510   6.532599   3.683686   3.198277   0.976810
    17  O    6.087457   5.081372   4.735937   4.666024   2.690118
    18  H    6.298916   4.849954   5.554096   5.567516   3.654327
    19  Cr   5.021313   2.158445   7.953906   8.618307   7.925779
                   16         17         18         19
    16  H    0.000000
    17  O    2.198748   0.000000
    18  H    3.148829   0.969146   0.000000
    19  Cr   8.019594   6.195886   5.655051   0.000000
 Stoichiometry    C7H6CrO5(3+,4)
 Framework group  C1[X(C7H6CrO5)]
 Deg. of freedom    51
 Full point group                 C1      NOp   1
 RotChk:  IX=0 Diff= 2.63D-02
 Largest Abelian subgroup         C1      NOp   1
 Largest concise Abelian subgroup C1      NOp   1
                         Standard orientation:                         
 ---------------------------------------------------------------------
 Center     Atomic      Atomic             Coordinates (Angstroms)
 Number     Number       Type             X           Y           Z
 ---------------------------------------------------------------------
      1          6           0       -1.532513   -1.352834    0.161880
      2          6           0       -0.289093   -0.787423    0.221706
      3          6           0       -0.154271    0.617453    0.100740
      4          6           0       -1.237169    1.465718   -0.106377
      5          6           0       -2.500519    0.909467   -0.173095
      6          6           0       -2.664198   -0.510348   -0.033716
      7          1           0        0.578090   -1.418312    0.373810
      8          1           0       -1.147552    2.535591   -0.245431
      9          6           0        1.241460    1.149377    0.177121
     10          8           0        1.443572    2.420040    0.499947
     11          1           0        0.640566    2.885152    0.777913
     12          8           0        2.199425    0.440055   -0.029521
     13          8           0       -3.553248    1.696416   -0.371516
     14          1           0       -4.377343    1.180661   -0.392296
     15          8           0       -3.883112   -0.982253   -0.099098
     16          1           0       -3.878653   -1.953866    0.001436
     17          8           0       -1.814181   -2.662024    0.267820
     18          1           0       -1.001962   -3.181785    0.364739
     19         24           0        4.036042   -0.678908   -0.212949
 ---------------------------------------------------------------------
 Rotational constants (GHZ):           1.1774759           0.2926554           0.2372266
 Leave Link  202 at Wed May 24 01:16:25 2023, MaxMem=  2684354560 cpu:               0.1 elap:               0.0
 (Enter /home/xut/apps/g16/l301.exe)
 Basis read from rwf:  (5D, 7F)
 Pseudo-potential data read from rwf file.
 There are   342 symmetry adapted cartesian basis functions of A   symmetry.
 There are   328 symmetry adapted basis functions of A   symmetry.
   328 basis functions,   538 primitive gaussians,   342 cartesian basis functions
    51 alpha electrons       48 beta electrons
       nuclear repulsion energy       828.6556177181 Hartrees.
 IExCor= 4336 DFT=T Ex+Corr=M062X ExCW=0 ScaHFX=  0.540000
 ScaDFX=  1.000000  1.000000  1.000000  1.000000 ScalE2=  1.000000  1.000000
 IRadAn=      5 IRanWt=     -1 IRanGd=            0 ICorTp=0 IEmpDi=  4
 NAtoms=   19 NActive=   19 NUniq=   19 SFac= 1.00D+00 NAtFMM=   60 NAOKFM=F Big=F
 Integral buffers will be    131072 words long.
 Raffenetti 2 integral format.
 Two-electron integral symmetry is turned on.
 No density basis found on file   724.
 ------------------------------------------------------------------------------
 Polarizable Continuum Model (PCM)
 =================================
 Model                : PCM.
 Atomic radii         : SMD-Coulomb.
 Polarization charges : Total charges.
 Charge compensation  : None.
 Solution method      : On-the-fly selection.
 Cavity type          : VdW (van der Waals Surface) (Alpha=1.000).
 Cavity algorithm     : GePol (No added spheres)
                        Default sphere list used, NSphG=   19.
                        Lebedev-Laikov grids with approx.  5.0 points / Ang**2.
                        Smoothing algorithm: York/Karplus (Gamma=1.0000).
                        Polarization charges: spherical gaussians, with
                                              point-specific exponents (IZeta= 3).
                        Self-potential: point-specific (ISelfS= 7).
                        Self-field    : sphere-specific E.n sum rule (ISelfD= 2).
 1st derivatives      : Analytical E(r).r(x)/FMM algorithm (CHGder, D1EAlg=3).
                        Cavity 1st derivative terms included.
 Solvent              : Water, Eps=  78.355300 Eps(inf)=   1.777849
 ------------------------------------------------------------------------------
 Spheres list:
 ISph  on   Nord     Re0    Alpha      Xe            Ye            Ze
    1   C      1    1.8500  1.000     -1.532513     -1.352834      0.161880
    2   C      2    1.8500  1.000     -0.289093     -0.787423      0.221706
    3   C      3    1.8500  1.000     -0.154271      0.617453      0.100740
    4   C      4    1.8500  1.000     -1.237169      1.465718     -0.106377
    5   C      5    1.8500  1.000     -2.500519      0.909467     -0.173095
    6   C      6    1.8500  1.000     -2.664198     -0.510348     -0.033716
    7   H      7    1.2000  1.000      0.578090     -1.418312      0.373810
    8   H      8    1.2000  1.000     -1.147552      2.535591     -0.245431
    9   C      9    1.8500  1.000      1.241460      1.149377      0.177121
   10   O     10    1.5200  1.000      1.443572      2.420040      0.499947
   11   H     11    1.2000  1.000      0.640566      2.885152      0.777913
   12   O     12    1.5200  1.000      2.199425      0.440055     -0.029521
   13   O     13    1.5200  1.000     -3.553248      1.696416     -0.371516
   14   H     14    1.2000  1.000     -4.377343      1.180661     -0.392296
   15   O     15    1.5200  1.000     -3.883112     -0.982253     -0.099098
   16   H     16    1.2000  1.000     -3.878653     -1.953866      0.001436
   17   O     17    1.5200  1.000     -1.814181     -2.662024      0.267820
   18   H     18    1.2000  1.000     -1.001962     -3.181785      0.364739
   19  Cr     19    1.5115  1.000      4.036042     -0.678908     -0.212949
 ------------------------------------------------------------------------------
 GePol: Number of generator spheres                  =      19
 GePol: Total number of spheres                      =      19
 GePol: Number of exposed spheres                    =      19 (100.00%)
 GePol: Number of points                             =    1462
 GePol: Average weight of points                     =       0.13
 GePol: Minimum weight of points                     =   0.79D-10
 GePol: Maximum weight of points                     =    0.21991
 GePol: Number of points with low weight             =      67
 GePol: Fraction of low-weight points (<1% of avg)   =       4.58%
 GePol: Cavity surface area                          =    188.348 Ang**2
 GePol: Cavity volume                                =    155.061 Ang**3
 ------------------------------------------------------------------------------
 Atomic radii for non-electrostatic terms: SMD-CDS.
 ------------------------------------------------------------------------------
 PCM non-electrostatic energy =         0.0102448652 Hartrees.
 Nuclear repulsion after PCM non-electrostatic terms =      828.6658625833 Hartrees.
 Leave Link  301 at Wed May 24 01:16:25 2023, MaxMem=  2684354560 cpu:               0.7 elap:               0.1
 (Enter /home/xut/apps/g16/l302.exe)
 NPDir=0 NMtPBC=     1 NCelOv=     1 NCel=       1 NClECP=     1 NCelD=      1
         NCelK=      1 NCelE2=     1 NClLst=     1 CellRange=     0.0.
 One-electron integrals computed using PRISM.
 One-electron integral symmetry used in STVInt
   1 Symmetry operations used in ECPInt.
 ECPInt:  NShTT=    6105 NPrTT=   23469 LenC2=    5790 LenP2D=   15730.
 LDataN:  DoStor=T MaxTD1= 4 Len=   56
 NBasis=   328 RedAO= T EigKep=  1.97D-06  NBF=   328
 NBsUse=   327 1.00D-06 EigRej=  7.83D-07 NBFU=   327
 Precomputing XC quadrature grid using
 IXCGrd= 4 IRadAn=           5 IRanWt=          -1 IRanGd=           0 AccXCQ= 0.00D+00.
 Generated NRdTot=       0 NPtTot=           0 NUsed=           0 NTot=          32
 NSgBfM=   342   342   342   342   342 MxSgAt=    19 MxSgA2=    19.
 Leave Link  302 at Wed May 24 01:16:25 2023, MaxMem=  2684354560 cpu:               2.5 elap:               0.3
 (Enter /home/xut/apps/g16/l303.exe)
 DipDrv:  MaxL=1.
 Leave Link  303 at Wed May 24 01:16:25 2023, MaxMem=  2684354560 cpu:               0.3 elap:               0.1
 (Enter /home/xut/apps/g16/l401.exe)
 Initial guess from the checkpoint file:  "149-91-7-O12-Cr.chk"
 B after Tr=     0.000000    0.000000   -0.000000
         Rot=    0.999991   -0.001229    0.000618   -0.004106 Ang=  -0.50 deg.
 Guess basis will be translated and rotated to current coordinates.
 JPrj=2 DoOrth=T DoCkMO=T.
 Initial guess <Sx>= 0.0000 <Sy>= 0.0000 <Sz>= 1.5000 <S**2>= 4.7679 S= 1.7401
 Generating alternative initial guess.
 ExpMin= 1.90D-02 ExpMax= 8.59D+03 ExpMxC= 1.30D+03 IAcc=3 IRadAn=         5 AccDes= 0.00D+00
 Harris functional with IExCor= 1009 and IRadAn=       5 diagonalized for initial guess.
 HarFok:  IExCor= 1009 AccDes= 0.00D+00 IRadAn=         5 IDoV= 1 UseB2=F ITyADJ=14
 ICtDFT=  3500011 ScaDFX=  1.000000  1.000000  1.000000  1.000000
 FoFCou: FMM=F IPFlag=           0 FMFlag=      100000 FMFlg1=           0
         NFxFlg=           0 DoJE=T BraDBF=F KetDBF=T FulRan=T
         wScrn=  0.000000 ICntrl=       500 IOpCl=  0 I1Cent=   200000004 NGrid=           0
         NMat0=    1 NMatS0=      1 NMatT0=    0 NMatD0=    1 NMtDS0=    0 NMtDT0=    0
 Petite list used in FoFCou.
 Harris En= -732.160076738656    
 Leave Link  401 at Wed May 24 01:16:26 2023, MaxMem=  2684354560 cpu:              10.2 elap:               1.0
 (Enter /home/xut/apps/g16/l502.exe)
 Integral symmetry usage will be decided dynamically.
 UHF open shell SCF:
 Using DIIS extrapolation, IDIIS=  1040.
 NGot=  2684354560 LenX=  2684113999 LenY=  2683996594
 Requested convergence on RMS density matrix=1.00D-06 within 128 cycles.
 Requested convergence on MAX density matrix=1.00D-04.
 Requested convergence on             energy=1.00D-04.
 No special actions if energy rises.
 Fock matrices will be formed incrementally for  20 cycles.

 Cycle   1  Pass 1  IDiag  1:
 FoFJK:  IHMeth= 1 ICntrl=       0 DoSepK=F KAlg= 0 I1Cent=           0 FoldK=F
 IRaf= 910000000 NMat=       1 IRICut=       1 DoRegI=T DoRafI=F ISym2E= 0 IDoP0=0 IntGTp=1.
 FoFCou: FMM=F IPFlag=           0 FMFlag=      100000 FMFlg1=           0
         NFxFlg=           0 DoJE=F BraDBF=F KetDBF=F FulRan=T
         wScrn=  0.000000 ICntrl=         0 IOpCl=  1 I1Cent=           0 NGrid=           0
         NMat0=    1 NMatS0=      1 NMatT0=    0 NMatD0=    1 NMtDS0=    0 NMtDT0=    0
 Symmetry not used in FoFCou.
 Inv3:  Mode=1 IEnd=     6412332.
 Iteration    1 A*A^-1 deviation from unit magnitude is 3.55D-15 for    576.
 Iteration    1 A*A^-1 deviation from orthogonality  is 2.13D-15 for   1117    938.
 Iteration    1 A^-1*A deviation from unit magnitude is 3.66D-15 for    226.
 Iteration    1 A^-1*A deviation from orthogonality  is 4.60D-15 for   1129   1104.
 E= -732.275477874061    
 DIIS: error= 3.31D-03 at cycle   1 NSaved=   1.
 NSaved= 1 IEnMin= 1 EnMin= -732.275477874061     IErMin= 1 ErrMin= 3.31D-03
 ErrMax= 3.31D-03  0.00D+00 EMaxC= 1.00D-01 BMatC= 4.94D-02 BMatP= 4.94D-02
 IDIUse=3 WtCom= 9.67D-01 WtEn= 3.31D-02
 Coeff-Com:  0.100D+01
 Coeff-En:   0.100D+01
 Coeff:      0.100D+01
 Gap=     0.462 Goal=   None    Shift=    0.000
 Gap=     0.469 Goal=   None    Shift=    0.000
 GapD=    0.462 DampG=2.000 DampE=1.000 DampFc=2.0000 IDamp=-1.
 RMSDP=1.06D-02 MaxDP=9.19D-01              OVMax= 4.14D-02

 Cycle   2  Pass 1  IDiag  1:
 RMSU=  6.48D-03    CP:  8.74D-01
 E= -732.294834733476     Delta-E=       -0.019356859416 Rises=F Damp=F
 DIIS: error= 9.49D-04 at cycle   2 NSaved=   2.
 NSaved= 2 IEnMin= 2 EnMin= -732.294834733476     IErMin= 2 ErrMin= 9.49D-04
 ErrMax= 9.49D-04  0.00D+00 EMaxC= 1.00D-01 BMatC= 3.65D-03 BMatP= 4.94D-02
 IDIUse=3 WtCom= 9.91D-01 WtEn= 9.49D-03
 Coeff-Com:  0.177D-01 0.982D+00
 Coeff-En:   0.000D+00 0.100D+01
 Coeff:      0.176D-01 0.982D+00
 Gap=     0.145 Goal=   None    Shift=    0.000
 Gap=     0.264 Goal=   None    Shift=    0.000
 RMSDP=1.53D-03 MaxDP=1.32D-01 DE=-1.94D-02 OVMax= 9.33D-03

 Cycle   3  Pass 1  IDiag  1:
 RMSU=  1.06D-03    CP:  8.58D-01  1.05D+00
 E= -732.295144680983     Delta-E=       -0.000309947506 Rises=F Damp=F
 DIIS: error= 1.46D-03 at cycle   3 NSaved=   3.
 NSaved= 3 IEnMin= 3 EnMin= -732.295144680983     IErMin= 2 ErrMin= 9.49D-04
 ErrMax= 1.46D-03  0.00D+00 EMaxC= 1.00D-01 BMatC= 4.25D-03 BMatP= 3.65D-03
 IDIUse=3 WtCom= 2.07D-01 WtEn= 7.93D-01
 Coeff-Com: -0.580D-01 0.550D+00 0.508D+00
 Coeff-En:   0.000D+00 0.370D+00 0.630D+00
 Coeff:     -0.120D-01 0.407D+00 0.605D+00
 Gap=     0.147 Goal=   None    Shift=    0.000
 Gap=     0.267 Goal=   None    Shift=    0.000
 RMSDP=4.13D-04 MaxDP=3.50D-02 DE=-3.10D-04 OVMax= 7.36D-03

 Cycle   4  Pass 1  IDiag  1:
 RMSU=  3.41D-04    CP:  8.56D-01  1.06D+00  8.35D-01
 E= -732.295783663809     Delta-E=       -0.000638982827 Rises=F Damp=F
 DIIS: error= 6.29D-04 at cycle   4 NSaved=   4.
 NSaved= 4 IEnMin= 4 EnMin= -732.295783663809     IErMin= 4 ErrMin= 6.29D-04
 ErrMax= 6.29D-04  0.00D+00 EMaxC= 1.00D-01 BMatC= 6.75D-04 BMatP= 3.65D-03
 IDIUse=3 WtCom= 9.94D-01 WtEn= 6.29D-03
 Coeff-Com: -0.117D-01-0.313D-02 0.288D+00 0.727D+00
 Coeff-En:   0.000D+00 0.000D+00 0.933D-01 0.907D+00
 Coeff:     -0.117D-01-0.311D-02 0.287D+00 0.728D+00
 Gap=     0.147 Goal=   None    Shift=    0.000
 Gap=     0.266 Goal=   None    Shift=    0.000
 RMSDP=1.85D-04 MaxDP=1.47D-02 DE=-6.39D-04 OVMax= 2.51D-03

 Cycle   5  Pass 1  IDiag  1:
 RMSU=  8.17D-05    CP:  8.56D-01  1.06D+00  9.88D-01  1.06D+00
 E= -732.295903830429     Delta-E=       -0.000120166620 Rises=F Damp=F
 DIIS: error= 1.04D-04 at cycle   5 NSaved=   5.
 NSaved= 5 IEnMin= 5 EnMin= -732.295903830429     IErMin= 5 ErrMin= 1.04D-04
 ErrMax= 1.04D-04  0.00D+00 EMaxC= 1.00D-01 BMatC= 1.51D-05 BMatP= 6.75D-04
 IDIUse=3 WtCom= 9.99D-01 WtEn= 1.04D-03
 Coeff-Com: -0.220D-03-0.507D-01 0.839D-01 0.324D+00 0.643D+00
 Coeff-En:   0.000D+00 0.000D+00 0.000D+00 0.000D+00 0.100D+01
 Coeff:     -0.219D-03-0.506D-01 0.838D-01 0.324D+00 0.643D+00
 Gap=     0.147 Goal=   None    Shift=    0.000
 Gap=     0.266 Goal=   None    Shift=    0.000
 RMSDP=5.72D-05 MaxDP=5.12D-03 DE=-1.20D-04 OVMax= 1.53D-03

 Cycle   6  Pass 1  IDiag  1:
 RMSU=  4.02D-05    CP:  8.56D-01  1.06D+00  1.00D+00  1.14D+00  1.32D+00
 E= -732.295908788166     Delta-E=       -0.000004957737 Rises=F Damp=F
 DIIS: error= 8.00D-05 at cycle   6 NSaved=   6.
 NSaved= 6 IEnMin= 6 EnMin= -732.295908788166     IErMin= 6 ErrMin= 8.00D-05
 ErrMax= 8.00D-05  0.00D+00 EMaxC= 1.00D-01 BMatC= 1.81D-06 BMatP= 1.51D-05
 IDIUse=1 WtCom= 1.00D+00 WtEn= 0.00D+00
 Coeff-Com:  0.165D-02-0.187D-01-0.123D-01 0.548D-02 0.217D+00 0.807D+00
 Coeff:      0.165D-02-0.187D-01-0.123D-01 0.548D-02 0.217D+00 0.807D+00
 Gap=     0.147 Goal=   None    Shift=    0.000
 Gap=     0.266 Goal=   None    Shift=    0.000
 RMSDP=3.75D-05 MaxDP=3.57D-03 DE=-4.96D-06 OVMax= 1.94D-03

 Cycle   7  Pass 1  IDiag  1:
 RMSU=  1.36D-05    CP:  8.56D-01  1.06D+00  1.02D+00  1.18D+00  1.58D+00
                    CP:  1.40D+00
 E= -732.295910805165     Delta-E=       -0.000002016999 Rises=F Damp=F
 DIIS: error= 6.58D-05 at cycle   7 NSaved=   7.
 NSaved= 7 IEnMin= 7 EnMin= -732.295910805165     IErMin= 7 ErrMin= 6.58D-05
 ErrMax= 6.58D-05  0.00D+00 EMaxC= 1.00D-01 BMatC= 7.12D-07 BMatP= 1.81D-06
 IDIUse=1 WtCom= 1.00D+00 WtEn= 0.00D+00
 Coeff-Com:  0.634D-03 0.177D-03-0.147D-01-0.431D-01-0.181D-01 0.333D+00
 Coeff-Com:  0.742D+00
 Coeff:      0.634D-03 0.177D-03-0.147D-01-0.431D-01-0.181D-01 0.333D+00
 Coeff:      0.742D+00
 Gap=     0.147 Goal=   None    Shift=    0.000
 Gap=     0.266 Goal=   None    Shift=    0.000
 RMSDP=1.86D-05 MaxDP=1.69D-03 DE=-2.02D-06 OVMax= 1.59D-03

 Cycle   8  Pass 1  IDiag  1:
 RMSU=  6.44D-06    CP:  8.56D-01  1.06D+00  1.02D+00  1.20D+00  1.71D+00
                    CP:  1.66D+00  1.38D+00
 E= -732.295912073494     Delta-E=       -0.000001268329 Rises=F Damp=F
 DIIS: error= 5.90D-05 at cycle   8 NSaved=   8.
 NSaved= 8 IEnMin= 8 EnMin= -732.295912073494     IErMin= 8 ErrMin= 5.90D-05
 ErrMax= 5.90D-05  0.00D+00 EMaxC= 1.00D-01 BMatC= 3.66D-07 BMatP= 7.12D-07
 IDIUse=1 WtCom= 1.00D+00 WtEn= 0.00D+00
 Coeff-Com: -0.600D-03 0.855D-02 0.245D-02-0.162D-01-0.110D+00-0.225D+00
 Coeff-Com:  0.140D+00 0.120D+01
 Coeff:     -0.600D-03 0.855D-02 0.245D-02-0.162D-01-0.110D+00-0.225D+00
 Coeff:      0.140D+00 0.120D+01
 Gap=     0.147 Goal=   None    Shift=    0.000
 Gap=     0.266 Goal=   None    Shift=    0.000
 RMSDP=1.97D-05 MaxDP=1.32D-03 DE=-1.27D-06 OVMax= 2.55D-03

 Cycle   9  Pass 1  IDiag  1:
 RMSU=  6.28D-06    CP:  8.56D-01  1.06D+00  1.02D+00  1.21D+00  1.82D+00
                    CP:  1.92D+00  1.82D+00  2.51D+00
 E= -732.295913735392     Delta-E=       -0.000001661898 Rises=F Damp=F
 DIIS: error= 4.78D-05 at cycle   9 NSaved=   9.
 NSaved= 9 IEnMin= 9 EnMin= -732.295913735392     IErMin= 9 ErrMin= 4.78D-05
 ErrMax= 4.78D-05  0.00D+00 EMaxC= 1.00D-01 BMatC= 2.38D-07 BMatP= 3.66D-07
 IDIUse=1 WtCom= 1.00D+00 WtEn= 0.00D+00
 Coeff-Com: -0.147D-03-0.204D-02 0.730D-02 0.228D-01 0.249D-01-0.720D-01
 Coeff-Com: -0.437D+00-0.159D+00 0.162D+01
 Coeff:     -0.147D-03-0.204D-02 0.730D-02 0.228D-01 0.249D-01-0.720D-01
 Coeff:     -0.437D+00-0.159D+00 0.162D+01
 Gap=     0.147 Goal=   None    Shift=    0.000
 Gap=     0.266 Goal=   None    Shift=    0.000
 RMSDP=1.98D-05 MaxDP=1.25D-03 DE=-1.66D-06 OVMax= 3.19D-03

 Cycle  10  Pass 1  IDiag  1:
 RMSU=  1.18D-05    CP:  8.56D-01  1.06D+00  1.02D+00  1.21D+00  1.82D+00
                    CP:  2.09D+00  2.04D+00  3.00D+00  2.57D+00
 E= -732.295915428665     Delta-E=       -0.000001693272 Rises=F Damp=F
 DIIS: error= 3.17D-05 at cycle  10 NSaved=  10.
 NSaved=10 IEnMin=10 EnMin= -732.295915428665     IErMin=10 ErrMin= 3.17D-05
 ErrMax= 3.17D-05  0.00D+00 EMaxC= 1.00D-01 BMatC= 1.81D-07 BMatP= 2.38D-07
 IDIUse=1 WtCom= 1.00D+00 WtEn= 0.00D+00
 Coeff-Com:  0.359D-03-0.737D-02 0.180D-02 0.219D-01 0.930D-01 0.160D+00
 Coeff-Com: -0.346D+00-0.956D+00 0.844D+00 0.119D+01
 Coeff:      0.359D-03-0.737D-02 0.180D-02 0.219D-01 0.930D-01 0.160D+00
 Coeff:     -0.346D+00-0.956D+00 0.844D+00 0.119D+01
 Gap=     0.147 Goal=   None    Shift=    0.000
 Gap=     0.266 Goal=   None    Shift=    0.000
 RMSDP=2.22D-05 MaxDP=1.16D-03 DE=-1.69D-06 OVMax= 3.19D-03

 Cycle  11  Pass 1  IDiag  1:
 RMSU=  9.91D-06    CP:  8.56D-01  1.06D+00  1.02D+00  1.20D+00  1.77D+00
                    CP:  2.19D+00  2.11D+00  3.00D+00  3.00D+00  2.39D+00
 E= -732.295916789848     Delta-E=       -0.000001361184 Rises=F Damp=F
 DIIS: error= 2.24D-05 at cycle  11 NSaved=  11.
 NSaved=11 IEnMin=11 EnMin= -732.295916789848     IErMin=11 ErrMin= 2.24D-05
 ErrMax= 2.24D-05  0.00D+00 EMaxC= 1.00D-01 BMatC= 1.08D-07 BMatP= 1.81D-07
 IDIUse=1 WtCom= 1.00D+00 WtEn= 0.00D+00
 Coeff-Com:  0.210D-03-0.995D-03-0.432D-02-0.829D-02 0.136D-01 0.102D+00
 Coeff-Com:  0.151D+00-0.210D+00-0.631D+00 0.194D+00 0.139D+01
 Coeff:      0.210D-03-0.995D-03-0.432D-02-0.829D-02 0.136D-01 0.102D+00
 Coeff:      0.151D+00-0.210D+00-0.631D+00 0.194D+00 0.139D+01
 Gap=     0.147 Goal=   None    Shift=    0.000
 Gap=     0.266 Goal=   None    Shift=    0.000
 RMSDP=2.08D-05 MaxDP=1.29D-03 DE=-1.36D-06 OVMax= 2.65D-03

 Cycle  12  Pass 1  IDiag  1:
 RMSU=  8.38D-06    CP:  8.56D-01  1.06D+00  1.03D+00  1.19D+00  1.71D+00
                    CP:  2.22D+00  2.05D+00  3.00D+00  3.00D+00  3.00D+00
                    CP:  2.24D+00
 E= -732.295917747047     Delta-E=       -0.000000957198 Rises=F Damp=F
 DIIS: error= 2.22D-05 at cycle  12 NSaved=  12.
 NSaved=12 IEnMin=12 EnMin= -732.295917747047     IErMin=12 ErrMin= 2.22D-05
 ErrMax= 2.22D-05  0.00D+00 EMaxC= 1.00D-01 BMatC= 8.82D-08 BMatP= 1.08D-07
 IDIUse=1 WtCom= 1.00D+00 WtEn= 0.00D+00
 Coeff-Com: -0.730D-04 0.255D-02-0.204D-02-0.105D-01-0.308D-01-0.333D-01
 Coeff-Com:  0.185D+00 0.287D+00-0.452D+00-0.518D+00 0.544D+00 0.103D+01
 Coeff:     -0.730D-04 0.255D-02-0.204D-02-0.105D-01-0.308D-01-0.333D-01
 Coeff:      0.185D+00 0.287D+00-0.452D+00-0.518D+00 0.544D+00 0.103D+01
 Gap=     0.147 Goal=   None    Shift=    0.000
 Gap=     0.266 Goal=   None    Shift=    0.000
 RMSDP=1.16D-05 MaxDP=6.86D-04 DE=-9.57D-07 OVMax= 1.14D-03

 Cycle  13  Pass 1  IDiag  1:
 RMSU=  2.11D-06    CP:  8.56D-01  1.06D+00  1.03D+00  1.19D+00  1.68D+00
                    CP:  2.23D+00  2.02D+00  3.00D+00  3.00D+00  3.00D+00
                    CP:  2.93D+00  2.01D+00
 E= -732.295918242076     Delta-E=       -0.000000495030 Rises=F Damp=F
 DIIS: error= 2.21D-05 at cycle  13 NSaved=  13.
 NSaved=13 IEnMin=13 EnMin= -732.295918242076     IErMin=13 ErrMin= 2.21D-05
 ErrMax= 2.21D-05  0.00D+00 EMaxC= 1.00D-01 BMatC= 7.64D-08 BMatP= 8.82D-08
 IDIUse=1 WtCom= 1.00D+00 WtEn= 0.00D+00
 Coeff-Com: -0.692D-04 0.793D-03 0.650D-03 0.127D-03-0.973D-02-0.337D-01
 Coeff-Com:  0.197D-02 0.103D+00 0.910D-01-0.175D+00-0.208D+00 0.151D+00
 Coeff-Com:  0.108D+01
 Coeff:     -0.692D-04 0.793D-03 0.650D-03 0.127D-03-0.973D-02-0.337D-01
 Coeff:      0.197D-02 0.103D+00 0.910D-01-0.175D+00-0.208D+00 0.151D+00
 Coeff:      0.108D+01
 Gap=     0.147 Goal=   None    Shift=    0.000
 Gap=     0.266 Goal=   None    Shift=    0.000
 RMSDP=6.40D-06 MaxDP=4.83D-04 DE=-4.95D-07 OVMax= 5.63D-04

 Cycle  14  Pass 1  IDiag  1:
 RMSU=  3.06D-06    CP:  8.56D-01  1.06D+00  1.03D+00  1.19D+00  1.68D+00
                    CP:  2.23D+00  2.05D+00  3.00D+00  3.00D+00  3.00D+00
                    CP:  3.00D+00  2.51D+00  2.30D+00
 E= -732.295918559116     Delta-E=       -0.000000317039 Rises=F Damp=F
 DIIS: error= 2.19D-05 at cycle  14 NSaved=  14.
 NSaved=14 IEnMin=14 EnMin= -732.295918559116     IErMin=14 ErrMin= 2.19D-05
 ErrMax= 2.19D-05  0.00D+00 EMaxC= 1.00D-01 BMatC= 7.47D-08 BMatP= 7.64D-08
 IDIUse=1 WtCom= 1.00D+00 WtEn= 0.00D+00
 Coeff-Com:  0.489D-05-0.492D-03 0.634D-03 0.272D-02 0.587D-02 0.233D-02
 Coeff-Com: -0.435D-01-0.551D-01 0.128D+00 0.883D-01-0.158D+00-0.224D+00
 Coeff-Com:  0.193D+00 0.106D+01
 Coeff:      0.489D-05-0.492D-03 0.634D-03 0.272D-02 0.587D-02 0.233D-02
 Coeff:     -0.435D-01-0.551D-01 0.128D+00 0.883D-01-0.158D+00-0.224D+00
 Coeff:      0.193D+00 0.106D+01
 Gap=     0.147 Goal=   None    Shift=    0.000
 Gap=     0.266 Goal=   None    Shift=    0.000
 RMSDP=5.80D-06 MaxDP=4.46D-04 DE=-3.17D-07 OVMax= 5.19D-04

 Cycle  15  Pass 1  IDiag  1:
 RMSU=  1.52D-06    CP:  8.56D-01  1.06D+00  1.03D+00  1.18D+00  1.68D+00
                    CP:  2.23D+00  2.07D+00  3.00D+00  3.00D+00  3.00D+00
                    CP:  3.00D+00  2.92D+00  3.00D+00  2.07D+00
 E= -732.295918848965     Delta-E=       -0.000000289849 Rises=F Damp=F
 DIIS: error= 2.18D-05 at cycle  15 NSaved=  15.
 NSaved=15 IEnMin=15 EnMin= -732.295918848965     IErMin=15 ErrMin= 2.18D-05
 ErrMax= 2.18D-05  0.00D+00 EMaxC= 1.00D-01 BMatC= 7.44D-08 BMatP= 7.47D-08
 IDIUse=1 WtCom= 1.00D+00 WtEn= 0.00D+00
 Coeff-Com:  0.153D-04-0.344D-03 0.113D-03 0.102D-02 0.432D-02 0.745D-02
 Coeff-Com: -0.190D-01-0.447D-01 0.353D-01 0.756D-01-0.206D-01-0.128D+00
 Coeff-Com: -0.169D+00 0.441D+00 0.817D+00
 Coeff:      0.153D-04-0.344D-03 0.113D-03 0.102D-02 0.432D-02 0.745D-02
 Coeff:     -0.190D-01-0.447D-01 0.353D-01 0.756D-01-0.206D-01-0.128D+00
 Coeff:     -0.169D+00 0.441D+00 0.817D+00
 Gap=     0.147 Goal=   None    Shift=    0.000
 Gap=     0.266 Goal=   None    Shift=    0.000
 RMSDP=4.63D-06 MaxDP=3.54D-04 DE=-2.90D-07 OVMax= 4.12D-04

 Cycle  16  Pass 1  IDiag  1:
 RMSU=  2.06D-06    CP:  8.56D-01  1.06D+00  1.03D+00  1.18D+00  1.68D+00
                    CP:  2.21D+00  2.08D+00  3.00D+00  3.00D+00  3.00D+00
                    CP:  3.00D+00  3.00D+00  3.00D+00  2.93D+00  2.58D+00
 E= -732.295919079609     Delta-E=       -0.000000230643 Rises=F Damp=F
 DIIS: error= 2.17D-05 at cycle  16 NSaved=  16.
 NSaved=16 IEnMin=16 EnMin= -732.295919079609     IErMin=16 ErrMin= 2.17D-05
 ErrMax= 2.17D-05  0.00D+00 EMaxC= 1.00D-01 BMatC= 7.43D-08 BMatP= 7.44D-08
 IDIUse=1 WtCom= 1.00D+00 WtEn= 0.00D+00
 Coeff-Com: -0.786D-06 0.130D-03-0.173D-03-0.738D-03-0.125D-02 0.216D-03
 Coeff-Com:  0.111D-01 0.133D-01-0.401D-01-0.143D-01 0.470D-01 0.562D-01
 Coeff-Com: -0.100D+00-0.299D+00 0.136D+00 0.119D+01
 Coeff:     -0.786D-06 0.130D-03-0.173D-03-0.738D-03-0.125D-02 0.216D-03
 Coeff:      0.111D-01 0.133D-01-0.401D-01-0.143D-01 0.470D-01 0.562D-01
 Coeff:     -0.100D+00-0.299D+00 0.136D+00 0.119D+01
 Gap=     0.147 Goal=   None    Shift=    0.000
 Gap=     0.266 Goal=   None    Shift=    0.000
 RMSDP=6.60D-06 MaxDP=4.98D-04 DE=-2.31D-07 OVMax= 5.79D-04

 Cycle  17  Pass 1  IDiag  1:
 RMSU=  4.44D-06    CP:  8.56D-01  1.06D+00  1.03D+00  1.18D+00  1.67D+00
                    CP:  2.19D+00  2.08D+00  3.00D+00  3.00D+00  3.00D+00
                    CP:  3.00D+00  3.00D+00  3.00D+00  3.00D+00  3.00D+00
                    CP:  2.85D+00
 E= -732.295919404938     Delta-E=       -0.000000325329 Rises=F Damp=F
 DIIS: error= 2.16D-05 at cycle  17 NSaved=  17.
 NSaved=17 IEnMin=17 EnMin= -732.295919404938     IErMin=17 ErrMin= 2.16D-05
 ErrMax= 2.16D-05  0.00D+00 EMaxC= 1.00D-01 BMatC= 7.42D-08 BMatP= 7.43D-08
 IDIUse=1 WtCom= 1.00D+00 WtEn= 0.00D+00
 Coeff-Com: -0.813D-05 0.208D-03-0.925D-04-0.691D-03-0.233D-02-0.334D-02
 Coeff-Com:  0.105D-01 0.245D-01-0.298D-01-0.324D-01 0.217D-01 0.799D-01
 Coeff-Com:  0.367D-01-0.312D+00-0.331D+00 0.434D+00 0.110D+01
 Coeff:     -0.813D-05 0.208D-03-0.925D-04-0.691D-03-0.233D-02-0.334D-02
 Coeff:      0.105D-01 0.245D-01-0.298D-01-0.324D-01 0.217D-01 0.799D-01
 Coeff:      0.367D-01-0.312D+00-0.331D+00 0.434D+00 0.110D+01
 Gap=     0.147 Goal=   None    Shift=    0.000
 Gap=     0.266 Goal=   None    Shift=    0.000
 RMSDP=7.61D-06 MaxDP=5.71D-04 DE=-3.25D-07 OVMax= 6.62D-04

 Cycle  18  Pass 1  IDiag  1:
 RMSU=  4.12D-06    CP:  8.56D-01  1.06D+00  1.03D+00  1.18D+00  1.66D+00
                    CP:  2.16D+00  2.08D+00  3.00D+00  3.00D+00  3.00D+00
                    CP:  3.00D+00  3.00D+00  3.00D+00  3.00D+00  3.00D+00
                    CP:  3.00D+00  2.30D+00
 E= -732.295919778413     Delta-E=       -0.000000373475 Rises=F Damp=F
 DIIS: error= 2.14D-05 at cycle  18 NSaved=  18.
 NSaved=18 IEnMin=18 EnMin= -732.295919778413     IErMin=18 ErrMin= 2.14D-05
 ErrMax= 2.14D-05  0.00D+00 EMaxC= 1.00D-01 BMatC= 7.42D-08 BMatP= 7.42D-08
 IDIUse=1 WtCom= 1.00D+00 WtEn= 0.00D+00
 Coeff-Com: -0.537D-05 0.126D-03-0.395D-04-0.372D-03-0.137D-02-0.210D-02
 Coeff-Com:  0.553D-02 0.142D-01-0.163D-01-0.172D-01 0.933D-02 0.459D-01
 Coeff-Com:  0.240D-01-0.179D+00-0.202D+00 0.217D+00 0.692D+00 0.409D+00
 Coeff:     -0.537D-05 0.126D-03-0.395D-04-0.372D-03-0.137D-02-0.210D-02
 Coeff:      0.553D-02 0.142D-01-0.163D-01-0.172D-01 0.933D-02 0.459D-01
 Coeff:      0.240D-01-0.179D+00-0.202D+00 0.217D+00 0.692D+00 0.409D+00
 Gap=     0.147 Goal=   None    Shift=    0.000
 Gap=     0.266 Goal=   None    Shift=    0.000
 RMSDP=1.93D-06 MaxDP=1.43D-04 DE=-3.73D-07 OVMax= 1.66D-04

 Cycle  19  Pass 1  IDiag  1:
 RMSU=  4.27D-08    CP:  8.56D-01  1.06D+00  1.03D+00  1.18D+00  1.66D+00
                    CP:  2.16D+00  2.08D+00  3.00D+00  3.00D+00  3.00D+00
                    CP:  3.00D+00  3.00D+00  3.00D+00  3.00D+00  3.00D+00
                    CP:  3.00D+00  2.63D+00  1.27D+00
 E= -732.295919872933     Delta-E=       -0.000000094520 Rises=F Damp=F
 DIIS: error= 2.14D-05 at cycle  19 NSaved=  19.
 NSaved=19 IEnMin=19 EnMin= -732.295919872933     IErMin=19 ErrMin= 2.14D-05
 ErrMax= 2.14D-05  0.00D+00 EMaxC= 1.00D-01 BMatC= 7.42D-08 BMatP= 7.42D-08
 IDIUse=1 WtCom= 1.00D+00 WtEn= 0.00D+00
 Coeff-Com: -0.106D-04 0.158D-03 0.571D-04-0.182D-03-0.192D-02-0.466D-02
 Coeff-Com:  0.296D-02 0.198D-01-0.292D-02-0.254D-01-0.201D-01 0.509D-01
 Coeff-Com:  0.129D+00-0.141D+00-0.522D+00-0.491D+00 0.137D+01 0.553D+01
 Coeff-Com: -0.490D+01
 Coeff:     -0.106D-04 0.158D-03 0.571D-04-0.182D-03-0.192D-02-0.466D-02
 Coeff:      0.296D-02 0.198D-01-0.292D-02-0.254D-01-0.201D-01 0.509D-01
 Coeff:      0.129D+00-0.141D+00-0.522D+00-0.491D+00 0.137D+01 0.553D+01
 Coeff:     -0.490D+01
 Gap=     0.147 Goal=   None    Shift=    0.000
 Gap=     0.266 Goal=   None    Shift=    0.000
 RMSDP=1.80D-06 MaxDP=1.26D-04 DE=-9.45D-08 OVMax= 1.46D-04

 Cycle  20  Pass 1  IDiag  1:
 RMSU=  1.37D-07    CP:  8.56D-01  1.06D+00  1.03D+00  1.18D+00  1.66D+00
                    CP:  2.17D+00  2.08D+00  3.00D+00  3.00D+00  3.00D+00
                    CP:  3.00D+00  3.00D+00  3.00D+00  3.00D+00  3.00D+00
                    CP:  3.00D+00  2.32D+00  1.03D+00 -2.09D+00
 E= -732.295919786138     Delta-E=        0.000000086795 Rises=F Damp=F
 DIIS: error= 2.14D-05 at cycle  20 NSaved=  20.
 NSaved=20 IEnMin=19 EnMin= -732.295919872933     IErMin=19 ErrMin= 2.14D-05
 ErrMax= 2.14D-05  0.00D+00 EMaxC= 1.00D-01 BMatC= 7.42D-08 BMatP= 7.42D-08
 IDIUse=1 WtCom= 1.00D+00 WtEn= 0.00D+00
 Large coefficients: NSaved= 20 BigCof=   30.53 CofMax=   10.00 Det=-3.46D-13
 Inversion failed.  Reducing to 19 matrices.
 Large coefficients: NSaved= 19 BigCof=   30.46 CofMax=   10.00 Det=-3.46D-13
 Inversion failed.  Reducing to 18 matrices.
 Large coefficients: NSaved= 18 BigCof=   25.45 CofMax=   10.00 Det=-4.07D-13
 Inversion failed.  Reducing to 17 matrices.
 Large coefficients: NSaved= 17 BigCof=   23.34 CofMax=   10.00 Det=-4.41D-13
 Inversion failed.  Reducing to 16 matrices.
 Large coefficients: NSaved= 16 BigCof=   22.75 CofMax=   10.00 Det=-4.51D-13
 Inversion failed.  Reducing to 15 matrices.
 Large coefficients: NSaved= 15 BigCof=   22.22 CofMax=   10.00 Det=-4.64D-13
 Inversion failed.  Reducing to 14 matrices.
 Large coefficients: NSaved= 14 BigCof=   22.13 CofMax=   10.00 Det=-4.65D-13
 Inversion failed.  Reducing to 13 matrices.
 Large coefficients: NSaved= 13 BigCof=   21.38 CofMax=   10.00 Det=-4.81D-13
 Inversion failed.  Reducing to 12 matrices.
 Large coefficients: NSaved= 12 BigCof=   20.46 CofMax=   10.00 Det=-4.97D-13
 Inversion failed.  Reducing to 11 matrices.
 Large coefficients: NSaved= 11 BigCof=   18.56 CofMax=   10.00 Det=-5.46D-13
 Inversion failed.  Reducing to 10 matrices.
 Large coefficients: NSaved= 10 BigCof=   18.24 CofMax=   10.00 Det=-5.52D-13
 Inversion failed.  Reducing to  9 matrices.
 Large coefficients: NSaved=  9 BigCof=   17.76 CofMax=   10.00 Det=-5.71D-13
 Inversion failed.  Reducing to  8 matrices.
 Large coefficients: NSaved=  8 BigCof=   17.25 CofMax=   10.00 Det=-5.89D-13
 Inversion failed.  Reducing to  7 matrices.
 Large coefficients: NSaved=  7 BigCof=   16.89 CofMax=   10.00 Det=-6.06D-13
 Inversion failed.  Reducing to  6 matrices.
 Large coefficients: NSaved=  6 BigCof=   14.52 CofMax=   10.00 Det=-6.97D-13
 Inversion failed.  Reducing to  5 matrices.
 Large coefficients: NSaved=  5 BigCof=   14.33 CofMax=   10.00 Det=-7.15D-13
 Inversion failed.  Reducing to  4 matrices.
 Coeff-Com: -0.837D+00 0.679D+01-0.765D+01 0.270D+01
 Coeff:     -0.837D+00 0.679D+01-0.765D+01 0.270D+01
 Gap=     0.147 Goal=   None    Shift=    0.000
 Gap=     0.266 Goal=   None    Shift=    0.000
 RMSDP=4.06D-06 MaxDP=2.84D-04 DE= 8.68D-08 OVMax= 3.31D-04

 Cycle  21  Pass 1  IDiag  1:
 Restarting incremental Fock formation.
 E= -732.295919588893     Delta-E=        0.000000197245 Rises=F Damp=F
 DIIS: error= 2.16D-05 at cycle  21 NSaved=   5.
 NSaved= 5 IEnMin= 3 EnMin= -732.295919872933     IErMin= 3 ErrMin= 2.14D-05
 ErrMax= 2.16D-05  0.00D+00 EMaxC= 1.00D-01 BMatC= 7.40D-08 BMatP= 7.42D-08
 IDIUse=1 WtCom= 1.00D+00 WtEn= 0.00D+00
 Large coefficients: NSaved=  5 BigCof=   10.92 CofMax=   10.00 Det=-1.35D-12
 Inversion failed.  Reducing to  4 matrices.
 Coeff-Com: -0.110D+00-0.310D+01 0.241D+01 0.180D+01
 Coeff:     -0.110D+00-0.310D+01 0.241D+01 0.180D+01
 Gap=     0.147 Goal=   None    Shift=    0.000
 Gap=     0.266 Goal=   None    Shift=    0.000
 RMSDP=4.71D-06 MaxDP=3.46D-04 DE= 1.97D-07 OVMax= 3.60D-04

 Cycle  22  Pass 1  IDiag  1:
 RMSU=  4.69D-06    CP:  1.00D+00
 E= -732.295919364285     Delta-E=        0.000000224609 Rises=F Damp=F
 DIIS: error= 2.19D-05 at cycle  22 NSaved=   5.
 NSaved= 5 IEnMin= 2 EnMin= -732.295919872933     IErMin= 2 ErrMin= 2.14D-05
 ErrMax= 2.19D-05  0.00D+00 EMaxC= 1.00D-01 BMatC= 7.38D-08 BMatP= 7.40D-08
 IDIUse=1 WtCom= 1.00D+00 WtEn= 0.00D+00
 Large coefficients: NSaved=  5 BigCof=   85.14 CofMax=   10.00 Det=-2.71D-13
 Inversion failed.  Reducing to  4 matrices.
 Coeff-Com: -0.424D+01 0.228D+01 0.188D+01 0.109D+01
 Coeff:     -0.424D+01 0.228D+01 0.188D+01 0.109D+01
 Gap=     0.147 Goal=   None    Shift=    0.000
 Gap=     0.266 Goal=   None    Shift=    0.000
 RMSDP=1.19D-05 MaxDP=8.21D-04 DE= 2.25D-07 OVMax= 9.46D-04

 Cycle  23  Pass 1  IDiag  1:
 RMSU=  2.61D-06    CP:  1.00D+00  3.00D+00
 E= -732.295918796852     Delta-E=        0.000000567433 Rises=F Damp=F
 DIIS: error= 2.24D-05 at cycle  23 NSaved=   5.
 NSaved= 5 IEnMin= 1 EnMin= -732.295919872933     IErMin= 1 ErrMin= 2.14D-05
 ErrMax= 2.24D-05  0.00D+00 EMaxC= 1.00D-01 BMatC= 7.33D-08 BMatP= 7.38D-08
 IDIUse=1 WtCom= 1.00D+00 WtEn= 0.00D+00
 Large coefficients: NSaved=  5 BigCof=   11.71 CofMax=   10.00 Det=-4.11D-12
 Inversion failed.  Reducing to  4 matrices.
 Coeff-Com:  0.934D+00-0.155D+01 0.324D+00 0.129D+01
 Coeff:      0.934D+00-0.155D+01 0.324D+00 0.129D+01
 Gap=     0.147 Goal=   None    Shift=    0.000
 Gap=     0.266 Goal=   None    Shift=    0.000
 RMSDP=3.38D-06 MaxDP=3.22D-04 DE= 5.67D-07 OVMax= 3.78D-04

 Cycle  24  Pass 1  IDiag  1:
 RMSU=  1.79D-06    CP:  1.00D+00  3.00D+00  2.09D+00
 E= -732.295918658661     Delta-E=        0.000000138191 Rises=F Damp=F
 DIIS: error= 2.27D-05 at cycle  24 NSaved=   5.
 NSaved= 5 IEnMin= 1 EnMin= -732.295919872933     IErMin= 1 ErrMin= 2.14D-05
 ErrMax= 2.27D-05  0.00D+00 EMaxC= 1.00D-01 BMatC= 7.30D-08 BMatP= 7.33D-08
 IDIUse=1 WtCom= 1.00D+00 WtEn= 0.00D+00
 Coeff-Com:  0.430D+01-0.344D+01-0.121D+01-0.180D+01 0.316D+01
 Coeff:      0.430D+01-0.344D+01-0.121D+01-0.180D+01 0.316D+01
 Gap=     0.147 Goal=   None    Shift=    0.000
 Gap=     0.266 Goal=   None    Shift=    0.000
 RMSDP=8.82D-06 MaxDP=7.21D-04 DE= 1.38D-07 OVMax= 7.98D-04

 Cycle  25  Pass 1  IDiag  1:
 RMSU=  2.14D-06    CP:  1.00D+00  2.59D+00 -3.82D-01  2.28D+00
 E= -732.295919074467     Delta-E=       -0.000000415806 Rises=F Damp=F
 DIIS: error= 2.29D-05 at cycle  25 NSaved=   6.
 NSaved= 6 IEnMin= 1 EnMin= -732.295919872933     IErMin= 1 ErrMin= 2.14D-05
 ErrMax= 2.29D-05  0.00D+00 EMaxC= 1.00D-01 BMatC= 7.24D-08 BMatP= 7.30D-08
 IDIUse=1 WtCom= 1.00D+00 WtEn= 0.00D+00
 Coeff-Com:  0.464D+01-0.171D+01-0.256D+01-0.607D+01 0.440D+01 0.229D+01
 Coeff:      0.464D+01-0.171D+01-0.256D+01-0.607D+01 0.440D+01 0.229D+01
 Gap=     0.147 Goal=   None    Shift=    0.000
 Gap=     0.266 Goal=   None    Shift=    0.000
 RMSDP=3.66D-05 MaxDP=2.94D-03 DE=-4.16D-07 OVMax= 3.29D-03

 Cycle  26  Pass 1  IDiag  1:
 RMSU=  1.10D-05    CP:  1.00D+00 -3.00D+00 -3.00D+00  3.00D+00  3.00D+00
 E= -732.295920815288     Delta-E=       -0.000001740822 Rises=F Damp=F
 DIIS: error= 2.31D-05 at cycle  26 NSaved=   7.
 NSaved= 7 IEnMin= 7 EnMin= -732.295920815288     IErMin= 1 ErrMin= 2.14D-05
 ErrMax= 2.31D-05  0.00D+00 EMaxC= 1.00D-01 BMatC= 7.05D-08 BMatP= 7.24D-08
 IDIUse=1 WtCom= 1.00D+00 WtEn= 0.00D+00
 Large coefficients: NSaved=  7 BigCof=   13.32 CofMax=   10.00 Det=-7.28D-12
 Inversion failed.  Reducing to  6 matrices.
 Coeff-Com: -0.409D+01 0.534D+01-0.235D+00-0.266D+01 0.693D+00 0.194D+01
 Coeff:     -0.409D+01 0.534D+01-0.235D+00-0.266D+01 0.693D+00 0.194D+01
 Gap=     0.147 Goal=   None    Shift=    0.000
 Gap=     0.266 Goal=   None    Shift=    0.000
 RMSDP=6.32D-05 MaxDP=5.05D-03 DE=-1.74D-06 OVMax= 5.66D-03

 Cycle  27  Pass 1  IDiag  1:
 RMSU=  5.73D-05    CP:  1.00D+00 -3.00D+00 -3.00D+00  3.00D+00  3.00D+00
                    CP:  3.00D+00
 E= -732.295923768695     Delta-E=       -0.000002953407 Rises=F Damp=F
 DIIS: error= 2.33D-05 at cycle  27 NSaved=   7.
 NSaved= 7 IEnMin= 7 EnMin= -732.295923768695     IErMin= 1 ErrMin= 2.14D-05
 ErrMax= 2.33D-05  0.00D+00 EMaxC= 1.00D-01 BMatC= 6.81D-08 BMatP= 7.05D-08
 IDIUse=1 WtCom= 1.00D+00 WtEn= 0.00D+00
 Coeff-Com: -0.513D+01 0.554D+01 0.536D+00-0.792D+00-0.146D+01 0.611D+00
 Coeff-Com:  0.170D+01
 Coeff:     -0.513D+01 0.554D+01 0.536D+00-0.792D+00-0.146D+01 0.611D+00
 Coeff:      0.170D+01
 Gap=     0.147 Goal=   None    Shift=    0.000
 Gap=     0.266 Goal=   None    Shift=    0.000
 RMSDP=1.00D-04 MaxDP=7.92D-03 DE=-2.95D-06 OVMax= 8.94D-03

 Cycle  28  Pass 1  IDiag  1:
 RMSU=  3.28D-05    CP:  1.00D+00 -3.00D+00 -3.00D+00  3.00D+00  3.00D+00
                    CP:  3.00D+00  2.64D+00
 E= -732.295928282307     Delta-E=       -0.000004513612 Rises=F Damp=F
 DIIS: error= 2.33D-05 at cycle  28 NSaved=   8.
 NSaved= 8 IEnMin= 8 EnMin= -732.295928282307     IErMin= 1 ErrMin= 2.14D-05
 ErrMax= 2.33D-05  0.00D+00 EMaxC= 1.00D-01 BMatC= 6.68D-08 BMatP= 6.81D-08
 IDIUse=1 WtCom= 1.00D+00 WtEn= 0.00D+00
 Coeff-Com: -0.371D+01 0.423D+01 0.358D+00-0.923D+00-0.727D+00 0.204D+00
 Coeff-Com:  0.104D+01 0.529D+00
 Coeff:     -0.371D+01 0.423D+01 0.358D+00-0.923D+00-0.727D+00 0.204D+00
 Coeff:      0.104D+01 0.529D+00
 Gap=     0.147 Goal=   None    Shift=    0.000
 Gap=     0.266 Goal=   None    Shift=    0.000
 RMSDP=2.92D-05 MaxDP=2.28D-03 DE=-4.51D-06 OVMax= 2.56D-03

 Cycle  29  Pass 1  IDiag  1:
 RMSU=  7.29D-06    CP:  1.00D+00 -3.00D+00 -3.00D+00  3.00D+00  3.00D+00
                    CP:  3.00D+00  3.00D+00  1.25D+00
 E= -732.295929562190     Delta-E=       -0.000001279883 Rises=F Damp=F
 DIIS: error= 2.31D-05 at cycle  29 NSaved=   9.
 NSaved= 9 IEnMin= 9 EnMin= -732.295929562190     IErMin= 1 ErrMin= 2.14D-05
 ErrMax= 2.31D-05  0.00D+00 EMaxC= 1.00D-01 BMatC= 6.46D-08 BMatP= 6.68D-08
 IDIUse=1 WtCom= 1.00D+00 WtEn= 0.00D+00
 Large coefficients: NSaved=  9 BigCof=   12.71 CofMax=   10.00 Det=-1.05D-11
 Inversion failed.  Reducing to  8 matrices.
 Large coefficients: NSaved=  8 BigCof=   10.90 CofMax=   10.00 Det=-1.06D-11
 Inversion failed.  Reducing to  7 matrices.
 Coeff-Com:  0.128D+01-0.143D+01-0.322D+00 0.108D+01-0.108D+01-0.245D+01
 Coeff-Com:  0.392D+01
 Coeff:      0.128D+01-0.143D+01-0.322D+00 0.108D+01-0.108D+01-0.245D+01
 Coeff:      0.392D+01
 Gap=     0.147 Goal=   None    Shift=    0.000
 Gap=     0.266 Goal=   None    Shift=    0.000
 RMSDP=1.13D-04 MaxDP=8.89D-03 DE=-1.28D-06 OVMax= 9.90D-03

 Cycle  30  Pass 1  IDiag  1:
 RMSU=  9.23D-05    CP:  1.00D+00 -3.00D+00 -3.00D+00  3.00D+00  3.00D+00
                    CP:  3.00D+00  3.00D+00  2.34D+00  3.00D+00
 E= -732.295934356654     Delta-E=       -0.000004794464 Rises=F Damp=F
 DIIS: error= 2.32D-05 at cycle  30 NSaved=   8.
 NSaved= 8 IEnMin= 8 EnMin= -732.295934356654     IErMin= 1 ErrMin= 2.14D-05
 ErrMax= 2.32D-05  0.00D+00 EMaxC= 1.00D-01 BMatC= 6.10D-08 BMatP= 6.46D-08
 IDIUse=1 WtCom= 1.00D+00 WtEn= 0.00D+00
 Coeff-Com:  0.729D+01-0.715D+01-0.184D+01 0.446D+01-0.358D+01-0.764D+01
 Coeff-Com:  0.605D+01 0.341D+01
 Coeff:      0.729D+01-0.715D+01-0.184D+01 0.446D+01-0.358D+01-0.764D+01
 Coeff:      0.605D+01 0.341D+01
 Gap=     0.147 Goal=   None    Shift=    0.000
 Gap=     0.266 Goal=   None    Shift=    0.000
 RMSDP=5.03D-04 MaxDP=3.84D-02 DE=-4.79D-06 OVMax= 4.88D-02

 Cycle  31  Pass 1  IDiag  1:
 RMSU=  3.21D-04    CP:  1.00D+00 -3.00D+00 -3.00D+00  3.00D+00  3.00D+00
                    CP:  3.00D+00  3.00D+00  3.00D+00  3.00D+00  3.00D+00
 E= -732.295952468589     Delta-E=       -0.000018111934 Rises=F Damp=F
 DIIS: error= 4.61D-05 at cycle  31 NSaved=   9.
 NSaved= 9 IEnMin= 9 EnMin= -732.295952468589     IErMin= 1 ErrMin= 2.14D-05
 ErrMax= 4.61D-05  0.00D+00 EMaxC= 1.00D-01 BMatC= 5.61D-07 BMatP= 6.10D-08
 IDIUse=1 WtCom= 1.00D+00 WtEn= 0.00D+00
 Coeff-Com:  0.931D+01-0.894D+01-0.245D+01 0.579D+01-0.376D+01-0.861D+01
 Coeff-Com:  0.575D+01 0.382D+01 0.841D-01
 Coeff:      0.931D+01-0.894D+01-0.245D+01 0.579D+01-0.376D+01-0.861D+01
 Coeff:      0.575D+01 0.382D+01 0.841D-01
 Gap=     0.147 Goal=   None    Shift=    0.000
 Gap=     0.266 Goal=   None    Shift=    0.000
 RMSDP=1.94D-05 MaxDP=1.34D-03 DE=-1.81D-05 OVMax= 1.81D-03

 Cycle  32  Pass 1  IDiag  1:
 RMSU=  5.69D-06    CP:  1.00D+00 -3.00D+00 -3.00D+00  3.00D+00  3.00D+00
                    CP:  3.00D+00  3.00D+00  3.00D+00  3.00D+00  3.00D+00
                    CP:  9.43D-01
 E= -732.295951984252     Delta-E=        0.000000484336 Rises=F Damp=F
 DIIS: error= 3.42D-05 at cycle  32 NSaved=  10.
 NSaved=10 IEnMin= 9 EnMin= -732.295952468589     IErMin= 1 ErrMin= 2.14D-05
 ErrMax= 3.42D-05  0.00D+00 EMaxC= 1.00D-01 BMatC= 3.29D-07 BMatP= 6.10D-08
 IDIUse=1 WtCom= 1.00D+00 WtEn= 0.00D+00
 Large coefficients: NSaved= 10 BigCof=   10.10 CofMax=   10.00 Det=-1.83D-11
 Inversion failed.  Reducing to  9 matrices.
 Coeff-Com:  0.603D+01-0.703D+01 0.299D+01-0.234D+01-0.531D+01 0.375D+01
 Coeff-Com:  0.252D+01-0.985D+00 0.137D+01
 Coeff:      0.603D+01-0.703D+01 0.299D+01-0.234D+01-0.531D+01 0.375D+01
 Coeff:      0.252D+01-0.985D+00 0.137D+01
 Gap=     0.147 Goal=   None    Shift=    0.000
 Gap=     0.266 Goal=   None    Shift=    0.000
 RMSDP=1.11D-05 MaxDP=8.66D-04 DE= 4.84D-07 OVMax= 9.09D-04

 Cycle  33  Pass 1  IDiag  1:
 RMSU=  2.22D-06    CP:  1.00D+00 -3.00D+00 -3.00D+00  3.00D+00  3.00D+00
                    CP:  3.00D+00  3.00D+00  3.00D+00  3.00D+00  3.00D+00
                    CP:  9.74D-01  1.66D+00
 E= -732.295952381208     Delta-E=       -0.000000396956 Rises=F Damp=F
 DIIS: error= 2.90D-05 at cycle  33 NSaved=  10.
 NSaved=10 IEnMin= 8 EnMin= -732.295952468589     IErMin= 1 ErrMin= 2.14D-05
 ErrMax= 2.90D-05  0.00D+00 EMaxC= 1.00D-01 BMatC= 2.51D-07 BMatP= 6.10D-08
 IDIUse=1 WtCom= 1.00D+00 WtEn= 0.00D+00
 Coeff-Com:  0.746D+01-0.791D+01 0.140D+01-0.126D+01-0.308D+01 0.219D+01
 Coeff-Com:  0.149D+01-0.170D+01 0.171D+01 0.701D+00
 Coeff:      0.746D+01-0.791D+01 0.140D+01-0.126D+01-0.308D+01 0.219D+01
 Coeff:      0.149D+01-0.170D+01 0.171D+01 0.701D+00
 Gap=     0.147 Goal=   None    Shift=    0.000
 Gap=     0.266 Goal=   None    Shift=    0.000
 RMSDP=6.76D-05 MaxDP=4.99D-03 DE=-3.97D-07 OVMax= 5.91D-03

 Cycle  34  Pass 1  IDiag  1:
 RMSU=  9.17D-06    CP:  1.00D+00 -3.00D+00 -3.00D+00  3.00D+00  3.00D+00
                    CP:  3.00D+00  3.00D+00  3.00D+00  3.00D+00  3.00D+00
                    CP:  1.18D+00  2.69D+00  3.00D+00
 E= -732.295954507952     Delta-E=       -0.000002126744 Rises=F Damp=F
 DIIS: error= 2.90D-05 at cycle  34 NSaved=  11.
 NSaved=11 IEnMin=11 EnMin= -732.295954507952     IErMin= 1 ErrMin= 2.14D-05
 ErrMax= 2.90D-05  0.00D+00 EMaxC= 1.00D-01 BMatC= 2.48D-07 BMatP= 6.10D-08
 IDIUse=1 WtCom= 1.00D+00 WtEn= 0.00D+00
 Coeff-Com:  0.693D+01-0.665D+01-0.123D+01 0.549D+00 0.757D+00-0.974D-01
 Coeff-Com: -0.207D+00-0.217D+01 0.145D+01 0.830D-01 0.159D+01
 Coeff:      0.693D+01-0.665D+01-0.123D+01 0.549D+00 0.757D+00-0.974D-01
 Coeff:     -0.207D+00-0.217D+01 0.145D+01 0.830D-01 0.159D+01
 Gap=     0.147 Goal=   None    Shift=    0.000
 Gap=     0.266 Goal=   None    Shift=    0.000
 RMSDP=6.32D-05 MaxDP=4.56D-03 DE=-2.13D-06 OVMax= 4.88D-03

 Cycle  35  Pass 1  IDiag  1:
 RMSU=  1.17D-05    CP:  1.00D+00 -3.00D+00 -3.00D+00  3.00D+00  3.00D+00
                    CP:  3.00D+00  3.00D+00  3.00D+00  3.00D+00  3.00D+00
                    CP:  1.36D+00  3.00D+00  3.00D+00  2.89D+00
 E= -732.295956479727     Delta-E=       -0.000001971775 Rises=F Damp=F
 DIIS: error= 2.32D-05 at cycle  35 NSaved=  12.
 NSaved=12 IEnMin=12 EnMin= -732.295956479727     IErMin= 1 ErrMin= 2.14D-05
 ErrMax= 2.32D-05  0.00D+00 EMaxC= 1.00D-01 BMatC= 1.13D-07 BMatP= 6.10D-08
 IDIUse=1 WtCom= 1.00D+00 WtEn= 0.00D+00
 Coeff-Com:  0.103D+01-0.309D+01 0.717D+01-0.470D+01-0.940D+01 0.581D+01
 Coeff-Com:  0.403D+01 0.319D+01-0.247D+01-0.781D+00-0.307D+01 0.328D+01
 Coeff:      0.103D+01-0.309D+01 0.717D+01-0.470D+01-0.940D+01 0.581D+01
 Coeff:      0.403D+01 0.319D+01-0.247D+01-0.781D+00-0.307D+01 0.328D+01
 Gap=     0.147 Goal=   None    Shift=    0.000
 Gap=     0.266 Goal=   None    Shift=    0.000
 RMSDP=2.59D-05 MaxDP=1.83D-03 DE=-1.97D-06 OVMax= 2.24D-03

 Cycle  36  Pass 1  IDiag  1:
 RMSU=  1.03D-05    CP:  1.00D+00 -3.00D+00 -3.00D+00  3.00D+00  3.00D+00
                    CP:  3.00D+00  3.00D+00  3.00D+00  3.00D+00  3.00D+00
                    CP:  1.43D+00  3.00D+00  3.00D+00  3.00D+00  1.76D+00
 E= -732.295957304583     Delta-E=       -0.000000824856 Rises=F Damp=F
 DIIS: error= 2.33D-05 at cycle  36 NSaved=  13.
 NSaved=13 IEnMin=13 EnMin= -732.295957304583     IErMin= 1 ErrMin= 2.14D-05
 ErrMax= 2.33D-05  0.00D+00 EMaxC= 1.00D-01 BMatC= 4.60D-08 BMatP= 6.10D-08
 IDIUse=1 WtCom= 1.00D+00 WtEn= 0.00D+00
 Large coefficients: NSaved= 13 BigCof=   11.85 CofMax=   10.00 Det=-1.53D-11
 Inversion failed.  Reducing to 12 matrices.
 Large coefficients: NSaved= 12 BigCof=   11.77 CofMax=   10.00 Det=-2.29D-11
 Inversion failed.  Reducing to 11 matrices.
 Coeff-Com:  0.991D+00-0.631D+00-0.111D+01 0.235D+00 0.526D+00 0.149D+01
 Coeff-Com: -0.123D+01-0.446D+00-0.126D+01 0.124D+01 0.120D+01
 Coeff:      0.991D+00-0.631D+00-0.111D+01 0.235D+00 0.526D+00 0.149D+01
 Coeff:     -0.123D+01-0.446D+00-0.126D+01 0.124D+01 0.120D+01
 Gap=     0.147 Goal=   None    Shift=    0.000
 Gap=     0.266 Goal=   None    Shift=    0.000
 RMSDP=1.12D-04 MaxDP=8.05D-03 DE=-8.25D-07 OVMax= 9.35D-03

 Cycle  37  Pass 1  IDiag  1:
 RMSU=  1.19D-05    CP:  1.00D+00 -3.00D+00 -3.00D+00  3.00D+00  3.00D+00
                    CP:  3.00D+00  3.00D+00  3.00D+00  3.00D+00  3.00D+00
                    CP:  1.76D+00  3.00D+00  3.00D+00  3.00D+00  3.00D+00
                    CP:  3.00D+00
 E= -732.295960633364     Delta-E=       -0.000003328781 Rises=F Damp=F
 DIIS: error= 2.22D-05 at cycle  37 NSaved=  12.
 NSaved=12 IEnMin=12 EnMin= -732.295960633364     IErMin=12 ErrMin= 2.22D-05
 ErrMax= 2.22D-05  0.00D+00 EMaxC= 1.00D-01 BMatC= 4.95D-08 BMatP= 4.60D-08
 IDIUse=1 WtCom= 1.00D+00 WtEn= 0.00D+00
 Coeff-Com:  0.841D+00-0.308D+00-0.706D+00-0.306D+00 0.371D+00 0.133D+01
 Coeff-Com: -0.902D+00-0.173D+00-0.108D+01 0.372D+00 0.114D+01 0.421D+00
 Coeff:      0.841D+00-0.308D+00-0.706D+00-0.306D+00 0.371D+00 0.133D+01
 Coeff:     -0.902D+00-0.173D+00-0.108D+01 0.372D+00 0.114D+01 0.421D+00
 Gap=     0.147 Goal=   None    Shift=    0.000
 Gap=     0.266 Goal=   None    Shift=    0.000
 RMSDP=2.60D-05 MaxDP=1.91D-03 DE=-3.33D-06 OVMax= 2.29D-03

 Cycle  38  Pass 1  IDiag  1:
 RMSU=  3.63D-06    CP:  1.00D+00 -3.00D+00 -3.00D+00  3.00D+00  3.00D+00
                    CP:  3.00D+00  3.00D+00  3.00D+00  3.00D+00  3.00D+00
                    CP:  1.83D+00  3.00D+00  3.00D+00  3.00D+00  3.00D+00
                    CP:  3.00D+00  1.58D+00
 E= -732.295961410595     Delta-E=       -0.000000777231 Rises=F Damp=F
 DIIS: error= 2.20D-05 at cycle  38 NSaved=  13.
 NSaved=13 IEnMin=13 EnMin= -732.295961410595     IErMin=13 ErrMin= 2.20D-05
 ErrMax= 2.20D-05  0.00D+00 EMaxC= 1.00D-01 BMatC= 5.14D-08 BMatP= 4.60D-08
 IDIUse=1 WtCom= 1.00D+00 WtEn= 0.00D+00
 Coeff-Com:  0.107D+01-0.651D+00-0.114D+01 0.100D+00 0.534D+00 0.166D+01
 Coeff-Com: -0.117D+01-0.285D+00-0.167D+01 0.919D+00 0.162D+01 0.176D+01
 Coeff-Com: -0.174D+01
 Coeff:      0.107D+01-0.651D+00-0.114D+01 0.100D+00 0.534D+00 0.166D+01
 Coeff:     -0.117D+01-0.285D+00-0.167D+01 0.919D+00 0.162D+01 0.176D+01
 Coeff:     -0.174D+01
 Gap=     0.147 Goal=   None    Shift=    0.000
 Gap=     0.266 Goal=   None    Shift=    0.000
 RMSDP=1.97D-05 MaxDP=1.37D-03 DE=-7.77D-07 OVMax= 1.80D-03

 Cycle  39  Pass 1  IDiag  1:
 RMSU=  1.35D-06    CP:  1.00D+00 -3.00D+00 -3.00D+00  3.00D+00  3.00D+00
                    CP:  3.00D+00  3.00D+00  3.00D+00  3.00D+00  3.00D+00
                    CP:  1.78D+00  3.00D+00  3.00D+00  3.00D+00  3.00D+00
                    CP:  3.00D+00  8.09D-01 -7.92D-01
 E= -732.295960787088     Delta-E=        0.000000623507 Rises=F Damp=F
 DIIS: error= 2.22D-05 at cycle  39 NSaved=  14.
 NSaved=14 IEnMin=13 EnMin= -732.295961410595     IErMin=13 ErrMin= 2.20D-05
 ErrMax= 2.22D-05  0.00D+00 EMaxC= 1.00D-01 BMatC= 4.44D-08 BMatP= 4.60D-08
 IDIUse=1 WtCom= 1.00D+00 WtEn= 0.00D+00
 Coeff-Com:  0.134D+01-0.983D+00-0.165D+01 0.482D+00 0.719D+00 0.154D+01
 Coeff-Com: -0.697D+00 0.116D+00-0.252D+01 0.138D+00 0.207D+01 0.348D+01
 Coeff-Com: -0.502D+01 0.198D+01
 Coeff:      0.134D+01-0.983D+00-0.165D+01 0.482D+00 0.719D+00 0.154D+01
 Coeff:     -0.697D+00 0.116D+00-0.252D+01 0.138D+00 0.207D+01 0.348D+01
 Coeff:     -0.502D+01 0.198D+01
 Gap=     0.147 Goal=   None    Shift=    0.000
 Gap=     0.266 Goal=   None    Shift=    0.000
 RMSDP=2.79D-05 MaxDP=2.12D-03 DE= 6.24D-07 OVMax= 2.74D-03

 Cycle  40  Pass 1  IDiag  1:
 RMSU=  4.88D-06    CP:  1.00D+00 -3.00D+00 -3.00D+00  3.00D+00  3.00D+00
                    CP:  3.00D+00  3.00D+00  3.00D+00  3.00D+00  3.00D+00
                    CP:  1.71D+00  3.00D+00  3.00D+00  3.00D+00  2.65D+00
                    CP:  2.71D+00  3.03D-01 -1.87D+00  2.23D+00
 E= -732.295959867519     Delta-E=        0.000000919569 Rises=F Damp=F
 DIIS: error= 2.22D-05 at cycle  40 NSaved=  15.
 NSaved=15 IEnMin=13 EnMin= -732.295961410595     IErMin=13 ErrMin= 2.20D-05
 ErrMax= 2.22D-05  0.00D+00 EMaxC= 1.00D-01 BMatC= 5.06D-08 BMatP= 4.44D-08
 IDIUse=1 WtCom= 1.00D+00 WtEn= 0.00D+00
 Coeff-Com:  0.133D+01-0.928D+00-0.155D+01 0.382D+00 0.681D+00 0.189D+01
 Coeff-Com: -0.104D+01-0.102D-02-0.251D+01 0.141D+00 0.218D+01 0.376D+01
 Coeff-Com: -0.554D+01 0.314D+01-0.926D+00
 Coeff:      0.133D+01-0.928D+00-0.155D+01 0.382D+00 0.681D+00 0.189D+01
 Coeff:     -0.104D+01-0.102D-02-0.251D+01 0.141D+00 0.218D+01 0.376D+01
 Coeff:     -0.554D+01 0.314D+01-0.926D+00
 Gap=     0.147 Goal=   None    Shift=    0.000
 Gap=     0.266 Goal=   None    Shift=    0.000
 RMSDP=1.67D-05 MaxDP=1.27D-03 DE= 9.20D-07 OVMax= 1.72D-03

 Cycle  41  Pass 1  IDiag  1:
 Restarting incremental Fock formation.
 E= -732.295960433778     Delta-E=       -0.000000566259 Rises=F Damp=F
 DIIS: error= 2.22D-05 at cycle  41 NSaved=  16.
 NSaved=16 IEnMin=13 EnMin= -732.295961410595     IErMin=13 ErrMin= 2.20D-05
 ErrMax= 2.22D-05  0.00D+00 EMaxC= 1.00D-01 BMatC= 4.55D-08 BMatP= 4.44D-08
 IDIUse=1 WtCom= 1.00D+00 WtEn= 0.00D+00
 Large coefficients: NSaved= 16 BigCof=   11.06 CofMax=   10.00 Det=-3.17D-12
 Inversion failed.  Reducing to 15 matrices.
 Coeff-Com:  0.272D+00 0.232D+00-0.613D+00-0.665D-01 0.106D+01-0.554D+00
 Coeff-Com: -0.147D-01-0.142D+01-0.241D+00 0.186D+01 0.299D+01-0.406D+01
 Coeff-Com:  0.229D+01-0.351D+00-0.386D+00
 Coeff:      0.272D+00 0.232D+00-0.613D+00-0.665D-01 0.106D+01-0.554D+00
 Coeff:     -0.147D-01-0.142D+01-0.241D+00 0.186D+01 0.299D+01-0.406D+01
 Coeff:      0.229D+01-0.351D+00-0.386D+00
 Gap=     0.147 Goal=   None    Shift=    0.000
 Gap=     0.266 Goal=   None    Shift=    0.000
 RMSDP=2.17D-05 MaxDP=1.63D-03 DE=-5.66D-07 OVMax= 1.94D-03

 Cycle  42  Pass 1  IDiag  1:
 RMSU=  2.15D-05    CP:  1.00D+00
 E= -732.295961008383     Delta-E=       -0.000000574605 Rises=F Damp=F
 DIIS: error= 2.28D-05 at cycle  42 NSaved=  16.
 NSaved=16 IEnMin=12 EnMin= -732.295961410595     IErMin=12 ErrMin= 2.20D-05
 ErrMax= 2.28D-05  0.00D+00 EMaxC= 1.00D-01 BMatC= 5.71D-08 BMatP= 4.44D-08
 IDIUse=1 WtCom= 1.00D+00 WtEn= 0.00D+00
 Coeff-Com:  0.556D+00 0.120D+01-0.178D+01-0.411D+00 0.208D+01-0.113D+01
 Coeff-Com:  0.146D+00-0.188D+01-0.108D+01 0.275D+01 0.508D+01-0.790D+01
 Coeff-Com:  0.630D+01-0.443D+01 0.321D+01-0.171D+01
 Coeff:      0.556D+00 0.120D+01-0.178D+01-0.411D+00 0.208D+01-0.113D+01
 Coeff:      0.146D+00-0.188D+01-0.108D+01 0.275D+01 0.508D+01-0.790D+01
 Coeff:      0.630D+01-0.443D+01 0.321D+01-0.171D+01
 Gap=     0.147 Goal=   None    Shift=    0.000
 Gap=     0.266 Goal=   None    Shift=    0.000
 RMSDP=4.97D-05 MaxDP=3.68D-03 DE=-5.75D-07 OVMax= 4.99D-03

 Cycle  43  Pass 1  IDiag  1:
 RMSU=  2.68D-05    CP:  1.00D+00  2.90D+00
 E= -732.295962662953     Delta-E=       -0.000001654570 Rises=F Damp=F
 DIIS: error= 2.23D-05 at cycle  43 NSaved=  17.
 NSaved=17 IEnMin=17 EnMin= -732.295962662953     IErMin=12 ErrMin= 2.20D-05
 ErrMax= 2.23D-05  0.00D+00 EMaxC= 1.00D-01 BMatC= 5.86D-08 BMatP= 4.44D-08
 IDIUse=1 WtCom= 1.00D+00 WtEn= 0.00D+00
 Coeff-Com:  0.466D+00 0.122D+01-0.148D+01-0.366D+00 0.342D+01-0.320D+01
 Coeff-Com: -0.110D+01-0.149D+01 0.163D+01 0.289D+01 0.219D+01-0.231D+01
 Coeff-Com:  0.245D+01-0.220D+01-0.529D+00-0.444D+01 0.385D+01
 Coeff:      0.466D+00 0.122D+01-0.148D+01-0.366D+00 0.342D+01-0.320D+01
 Coeff:     -0.110D+01-0.149D+01 0.163D+01 0.289D+01 0.219D+01-0.231D+01
 Coeff:      0.245D+01-0.220D+01-0.529D+00-0.444D+01 0.385D+01
 Gap=     0.147 Goal=   None    Shift=    0.000
 Gap=     0.266 Goal=   None    Shift=    0.000
 RMSDP=1.75D-04 MaxDP=1.26D-02 DE=-1.65D-06 OVMax= 1.81D-02

 Cycle  44  Pass 1  IDiag  1:
 RMSU=  1.44D-04    CP:  1.00D+00  3.00D+00  3.00D+00
 E= -732.295968523308     Delta-E=       -0.000005860354 Rises=F Damp=F
 DIIS: error= 2.15D-05 at cycle  44 NSaved=  18.
 NSaved=18 IEnMin=18 EnMin= -732.295968523308     IErMin=18 ErrMin= 2.15D-05
 ErrMax= 2.15D-05  0.00D+00 EMaxC= 1.00D-01 BMatC= 4.78D-08 BMatP= 4.44D-08
 IDIUse=1 WtCom= 1.00D+00 WtEn= 0.00D+00
 Coeff-Com:  0.514D+00 0.143D+01-0.172D+01-0.440D+00 0.349D+01-0.316D+01
 Coeff-Com: -0.100D+01-0.166D+01 0.138D+01 0.306D+01 0.264D+01-0.312D+01
 Coeff-Com:  0.320D+01-0.285D+01 0.233D+00-0.505D+01 0.423D+01-0.182D+00
 Coeff:      0.514D+00 0.143D+01-0.172D+01-0.440D+00 0.349D+01-0.316D+01
 Coeff:     -0.100D+01-0.166D+01 0.138D+01 0.306D+01 0.264D+01-0.312D+01
 Coeff:      0.320D+01-0.285D+01 0.233D+00-0.505D+01 0.423D+01-0.182D+00
 Gap=     0.147 Goal=   None    Shift=    0.000
 Gap=     0.266 Goal=   None    Shift=    0.000
 RMSDP=1.83D-05 MaxDP=1.36D-03 DE=-5.86D-06 OVMax= 1.91D-03

 Cycle  45  Pass 1  IDiag  1:
 RMSU=  3.40D-06    CP:  1.00D+00  3.00D+00  3.00D+00  8.77D-01
 E= -732.295967915643     Delta-E=        0.000000607665 Rises=F Damp=F
 DIIS: error= 2.14D-05 at cycle  45 NSaved=  19.
 NSaved=19 IEnMin=18 EnMin= -732.295968523308     IErMin=19 ErrMin= 2.14D-05
 ErrMax= 2.14D-05  0.00D+00 EMaxC= 1.00D-01 BMatC= 4.86D-08 BMatP= 4.44D-08
 IDIUse=1 WtCom= 1.00D+00 WtEn= 0.00D+00
 Large coefficients: NSaved= 19 BigCof=   18.78 CofMax=   10.00 Det=-1.54D-12
 Inversion failed.  Reducing to 18 matrices.
 Coeff-Com:  0.837D+00-0.708D+00-0.260D+00 0.267D+01-0.244D+01-0.789D+00
 Coeff-Com: -0.188D+01 0.156D+01 0.293D+01 0.236D+01-0.244D+01 0.570D+00
 Coeff-Com:  0.204D+01-0.214D+01-0.392D+01 0.240D+01 0.707D+01-0.685D+01
 Coeff:      0.837D+00-0.708D+00-0.260D+00 0.267D+01-0.244D+01-0.789D+00
 Coeff:     -0.188D+01 0.156D+01 0.293D+01 0.236D+01-0.244D+01 0.570D+00
 Coeff:      0.204D+01-0.214D+01-0.392D+01 0.240D+01 0.707D+01-0.685D+01
 Gap=     0.147 Goal=   None    Shift=    0.000
 Gap=     0.266 Goal=   None    Shift=    0.000
 RMSDP=5.52D-05 MaxDP=4.02D-03 DE= 6.08D-07 OVMax= 5.41D-03

 Cycle  46  Pass 1  IDiag  1:
 RMSU=  6.39D-06    CP:  1.00D+00  3.00D+00  3.00D+00  1.25D+00 -1.29D+00
 E= -732.295969675214     Delta-E=       -0.000001759572 Rises=F Damp=F
 DIIS: error= 2.14D-05 at cycle  46 NSaved=  19.
 NSaved=19 IEnMin=19 EnMin= -732.295969675214     IErMin=18 ErrMin= 2.14D-05
 ErrMax= 2.14D-05  0.00D+00 EMaxC= 1.00D-01 BMatC= 6.63D-08 BMatP= 4.44D-08
 IDIUse=1 WtCom= 1.00D+00 WtEn= 0.00D+00
 Large coefficients: NSaved= 19 BigCof=   22.52 CofMax=   10.00 Det=-2.04D-12
 Inversion failed.  Reducing to 18 matrices.
 Large coefficients: NSaved= 18 BigCof=   21.42 CofMax=   10.00 Det=-2.07D-12
 Inversion failed.  Reducing to 17 matrices.
 Large coefficients: NSaved= 17 BigCof=   21.85 CofMax=   10.00 Det=-2.11D-12
 Inversion failed.  Reducing to 16 matrices.
 Large coefficients: NSaved= 16 BigCof=   21.45 CofMax=   10.00 Det=-2.39D-12
 Inversion failed.  Reducing to 15 matrices.
 Large coefficients: NSaved= 15 BigCof=   14.81 CofMax=   10.00 Det=-3.17D-12
 Inversion failed.  Reducing to 14 matrices.
 Large coefficients: NSaved= 14 BigCof=   14.74 CofMax=   10.00 Det=-3.19D-12
 Inversion failed.  Reducing to 13 matrices.
 Large coefficients: NSaved= 13 BigCof=   14.15 CofMax=   10.00 Det=-3.24D-12
 Inversion failed.  Reducing to 12 matrices.
 Large coefficients: NSaved= 12 BigCof=   13.57 CofMax=   10.00 Det=-3.27D-12
 Inversion failed.  Reducing to 11 matrices.
 Coeff-Com:  0.444D+00-0.146D+01 0.341D+01-0.137D+01 0.366D+00-0.135D+01
 Coeff-Com: -0.159D+01 0.739D+00 0.919D+01-0.899D+01 0.162D+01
 Coeff:      0.444D+00-0.146D+01 0.341D+01-0.137D+01 0.366D+00-0.135D+01
 Coeff:     -0.159D+01 0.739D+00 0.919D+01-0.899D+01 0.162D+01
 Gap=     0.147 Goal=   None    Shift=    0.000
 Gap=     0.266 Goal=   None    Shift=    0.000
 RMSDP=4.38D-04 MaxDP=3.09D-02 DE=-1.76D-06 OVMax= 4.46D-02

 Cycle  47  Pass 1  IDiag  1:
 RMSU=  1.92D-04    CP:  1.00D+00  3.00D+00  3.00D+00  3.00D+00 -3.00D+00
                    CP:  1.36D-01
 E= -732.295983974770     Delta-E=       -0.000014299556 Rises=F Damp=F
 DIIS: error= 2.85D-05 at cycle  47 NSaved=  12.
 NSaved=12 IEnMin=12 EnMin= -732.295983974770     IErMin=10 ErrMin= 2.14D-05
 ErrMax= 2.85D-05  0.00D+00 EMaxC= 1.00D-01 BMatC= 3.74D-07 BMatP= 4.44D-08
 IDIUse=1 WtCom= 1.00D+00 WtEn= 0.00D+00
 Large coefficients: NSaved= 12 BigCof=   10.32 CofMax=   10.00 Det=-3.52D-12
 Inversion failed.  Reducing to 11 matrices.
 Large coefficients: NSaved= 11 BigCof=   11.00 CofMax=   10.00 Det=-3.61D-12
 Inversion failed.  Reducing to 10 matrices.
 Large coefficients: NSaved= 10 BigCof=   14.28 CofMax=   10.00 Det=-4.37D-12
 Inversion failed.  Reducing to  9 matrices.
 Large coefficients: NSaved=  9 BigCof=   14.47 CofMax=   10.00 Det=-5.34D-12
 Inversion failed.  Reducing to  8 matrices.
 Large coefficients: NSaved=  8 BigCof=   13.72 CofMax=   10.00 Det=-5.34D-12
 Inversion failed.  Reducing to  7 matrices.
 Large coefficients: NSaved=  7 BigCof=   15.14 CofMax=   10.00 Det=-6.12D-12
 Inversion failed.  Reducing to  6 matrices.
 Large coefficients: NSaved=  6 BigCof=   14.29 CofMax=   10.00 Det=-6.63D-12
 Inversion failed.  Reducing to  5 matrices.
 Large coefficients: NSaved=  5 BigCof=   10.81 CofMax=   10.00 Det=-6.84D-12
 Inversion failed.  Reducing to  4 matrices.
 Coeff-Com:  0.298D+01-0.226D+01 0.416D+00-0.132D+00
 Coeff:      0.298D+01-0.226D+01 0.416D+00-0.132D+00
 Gap=     0.147 Goal=   None    Shift=    0.000
 Gap=     0.266 Goal=   None    Shift=    0.000
 RMSDP=4.77D-04 MaxDP=3.36D-02 DE=-1.43D-05 OVMax= 4.85D-02

 Cycle  48  Pass 1  IDiag  1:
 RMSU=  1.53D-06    CP:  1.00D+00  3.00D+00  3.00D+00  9.86D-01  9.58D-01
                    CP:  6.57D-01 -6.34D-05
 E= -732.295968430034     Delta-E=        0.000015544737 Rises=F Damp=F
 DIIS: error= 2.17D-05 at cycle  48 NSaved=   5.
 NSaved= 5 IEnMin= 4 EnMin= -732.295983974770     IErMin= 2 ErrMin= 2.14D-05
 ErrMax= 2.17D-05  0.00D+00 EMaxC= 1.00D-01 BMatC= 4.62D-08 BMatP= 4.78D-08
 IDIUse=1 WtCom= 1.00D+00 WtEn= 0.00D+00
 Coeff-Com:  0.837D+00-0.581D+00 0.124D+00-0.113D+00 0.733D+00
 Coeff:      0.837D+00-0.581D+00 0.124D+00-0.113D+00 0.733D+00
 Gap=     0.147 Goal=   None    Shift=    0.000
 Gap=     0.266 Goal=   None    Shift=    0.000
 RMSDP=3.39D-05 MaxDP=2.47D-03 DE= 1.55D-05 OVMax= 3.45D-03

 Cycle  49  Pass 1  IDiag  1:
 RMSU=  4.70D-07    CP:  1.00D+00  3.00D+00  3.00D+00  7.60D-01  3.00D+00
                    CP:  8.00D-01 -1.19D-03  1.55D+00
 E= -732.295967307452     Delta-E=        0.000001122582 Rises=F Damp=F
 DIIS: error= 2.18D-05 at cycle  49 NSaved=   6.
 NSaved= 6 IEnMin= 4 EnMin= -732.295983974770     IErMin= 2 ErrMin= 2.14D-05
 ErrMax= 2.18D-05  0.00D+00 EMaxC= 1.00D-01 BMatC= 4.54D-08 BMatP= 4.62D-08
 IDIUse=1 WtCom= 1.00D+00 WtEn= 0.00D+00
 Coeff-Com: -0.671D+00 0.564D+00-0.139D+00-0.817D-01 0.474D+00 0.854D+00
 Coeff:     -0.671D+00 0.564D+00-0.139D+00-0.817D-01 0.474D+00 0.854D+00
 Gap=     0.147 Goal=   None    Shift=    0.000
 Gap=     0.266 Goal=   None    Shift=    0.000
 RMSDP=4.63D-05 MaxDP=3.38D-03 DE= 1.12D-06 OVMax= 4.70D-03

 Cycle  50  Pass 1  IDiag  1:
 RMSU=  8.10D-06    CP:  1.00D+00  3.00D+00  3.00D+00  4.52D-01  3.00D+00
                    CP:  1.00D+00 -2.67D-02  2.42D+00  3.00D+00
 E= -732.295965773530     Delta-E=        0.000001533922 Rises=F Damp=F
 DIIS: error= 2.20D-05 at cycle  50 NSaved=   7.
 NSaved= 7 IEnMin= 4 EnMin= -732.295983974770     IErMin= 2 ErrMin= 2.14D-05
 ErrMax= 2.20D-05  0.00D+00 EMaxC= 1.00D-01 BMatC= 4.50D-08 BMatP= 4.54D-08
 IDIUse=1 WtCom= 1.00D+00 WtEn= 0.00D+00
 Coeff-Com: -0.122D+01 0.829D+00-0.412D+00-0.109D+00 0.135D+01 0.492D+01
 Coeff-Com: -0.436D+01
 Coeff:     -0.122D+01 0.829D+00-0.412D+00-0.109D+00 0.135D+01 0.492D+01
 Coeff:     -0.436D+01
 Gap=     0.147 Goal=   None    Shift=    0.000
 Gap=     0.266 Goal=   None    Shift=    0.000
 RMSDP=1.83D-04 MaxDP=1.33D-02 DE= 1.53D-06 OVMax= 1.86D-02

 Cycle  51  Pass 1  IDiag  1:
 RMSU=  1.52D-06    CP:  1.00D+00  3.00D+00  3.00D+00  1.67D+00 -3.00D+00
                    CP:  4.05D-01  2.21D-02 -3.92D-01 -3.00D+00 -7.57D-01
 E= -732.295971811561     Delta-E=       -0.000006038031 Rises=F Damp=F
 DIIS: error= 2.13D-05 at cycle  51 NSaved=   8.
 NSaved= 8 IEnMin= 4 EnMin= -732.295983974770     IErMin= 8 ErrMin= 2.13D-05
 ErrMax= 2.13D-05  0.00D+00 EMaxC= 1.00D-01 BMatC= 5.59D-08 BMatP= 4.50D-08
 IDIUse=1 WtCom= 1.00D+00 WtEn= 0.00D+00
 Coeff-Com: -0.281D+01 0.196D+01-0.815D+00-0.194D+00 0.137D+01 0.660D+01
 Coeff-Com: -0.604D+01 0.930D+00
 Coeff:     -0.281D+01 0.196D+01-0.815D+00-0.194D+00 0.137D+01 0.660D+01
 Coeff:     -0.604D+01 0.930D+00
 Gap=     0.147 Goal=   None    Shift=    0.000
 Gap=     0.266 Goal=   None    Shift=    0.000
 RMSDP=9.52D-05 MaxDP=6.81D-03 DE=-6.04D-06 OVMax= 9.64D-03

 Cycle  52  Pass 1  IDiag  1:
 RMSU=  1.24D-06    CP:  1.00D+00  3.00D+00  3.00D+00  2.31D+00 -3.00D+00
                    CP:  2.39D-01  7.29D-02 -1.39D+00 -3.00D+00 -2.82D+00
                    CP:  3.00D+00
 E= -732.295974910794     Delta-E=       -0.000003099233 Rises=F Damp=F
 DIIS: error= 2.08D-05 at cycle  52 NSaved=   9.
 NSaved= 9 IEnMin= 4 EnMin= -732.295983974770     IErMin= 9 ErrMin= 2.08D-05
 ErrMax= 2.08D-05  0.00D+00 EMaxC= 1.00D-01 BMatC= 8.66D-08 BMatP= 4.50D-08
 IDIUse=1 WtCom= 1.00D+00 WtEn= 0.00D+00
 Coeff-Com:  0.228D+00-0.449D+00-0.976D-01 0.991D+00 0.133D+01 0.821D+01
 Coeff-Com: -0.798D+01 0.451D+01-0.575D+01
 Coeff:      0.228D+00-0.449D+00-0.976D-01 0.991D+00 0.133D+01 0.821D+01
 Coeff:     -0.798D+01 0.451D+01-0.575D+01
 Gap=     0.147 Goal=   None    Shift=    0.000
 Gap=     0.266 Goal=   None    Shift=    0.000
 RMSDP=3.46D-05 MaxDP=2.42D-03 DE=-3.10D-06 OVMax= 2.88D-03

 Cycle  53  Pass 1  IDiag  1:
 RMSU=  4.42D-06    CP:  1.00D+00  3.00D+00  3.00D+00  2.07D+00 -3.00D+00
                    CP:  2.55D-01  8.50D-02  6.99D-01 -3.00D+00 -3.00D+00
                    CP:  1.70D+00  7.83D-01
 E= -732.295973971542     Delta-E=        0.000000939253 Rises=F Damp=F
 DIIS: error= 2.16D-05 at cycle  53 NSaved=  10.
 NSaved=10 IEnMin= 4 EnMin= -732.295983974770     IErMin= 9 ErrMin= 2.08D-05
 ErrMax= 2.16D-05  0.00D+00 EMaxC= 1.00D-01 BMatC= 4.39D-08 BMatP= 4.50D-08
 IDIUse=1 WtCom= 1.00D+00 WtEn= 0.00D+00
 Coeff-Com: -0.309D+01 0.232D+01-0.486D+00 0.104D+01 0.494D+00 0.741D+01
 Coeff-Com: -0.696D+01 0.480D+01-0.575D+01 0.122D+01
 Coeff:     -0.309D+01 0.232D+01-0.486D+00 0.104D+01 0.494D+00 0.741D+01
 Coeff:     -0.696D+01 0.480D+01-0.575D+01 0.122D+01
 Gap=     0.147 Goal=   None    Shift=    0.000
 Gap=     0.266 Goal=   None    Shift=    0.000
 RMSDP=1.38D-04 MaxDP=9.53D-03 DE= 9.39D-07 OVMax= 1.44D-02

 Cycle  54  Pass 1  IDiag  1:
 RMSU=  3.08D-05    CP:  1.00D+00  3.00D+00  3.00D+00  2.97D+00 -3.00D+00
                    CP:  1.14D-01  1.96D-01  1.82D+00 -3.00D+00 -3.00D+00
                    CP:  3.00D+00  2.84D+00  3.00D+00
 E= -732.295978553582     Delta-E=       -0.000004582041 Rises=F Damp=F
 DIIS: error= 2.13D-05 at cycle  54 NSaved=  11.
 NSaved=11 IEnMin= 4 EnMin= -732.295983974770     IErMin= 9 ErrMin= 2.08D-05
 ErrMax= 2.13D-05  0.00D+00 EMaxC= 1.00D-01 BMatC= 4.54D-08 BMatP= 4.39D-08
 IDIUse=1 WtCom= 1.00D+00 WtEn= 0.00D+00
 Coeff-Com: -0.307D+01 0.228D+01-0.510D+00 0.108D+01 0.564D+00 0.785D+01
 Coeff-Com: -0.742D+01 0.504D+01-0.595D+01 0.127D+01-0.129D+00
 Coeff:     -0.307D+01 0.228D+01-0.510D+00 0.108D+01 0.564D+00 0.785D+01
 Coeff:     -0.742D+01 0.504D+01-0.595D+01 0.127D+01-0.129D+00
 Gap=     0.147 Goal=   None    Shift=    0.000
 Gap=     0.266 Goal=   None    Shift=    0.000
 RMSDP=9.81D-06 MaxDP=6.40D-04 DE=-4.58D-06 OVMax= 1.04D-03

 Cycle  55  Pass 1  IDiag  1:
 RMSU=  8.35D-07    CP:  1.00D+00  3.00D+00  3.00D+00  2.91D+00 -3.00D+00
                    CP:  1.18D-01  1.85D-01  1.55D+00 -3.00D+00 -3.00D+00
                    CP:  3.00D+00  2.64D+00  3.00D+00  8.80D-01
 E= -732.295978225531     Delta-E=        0.000000328052 Rises=F Damp=F
 DIIS: error= 2.13D-05 at cycle  55 NSaved=  12.
 NSaved=12 IEnMin= 4 EnMin= -732.295983974770     IErMin= 9 ErrMin= 2.08D-05
 ErrMax= 2.13D-05  0.00D+00 EMaxC= 1.00D-01 BMatC= 4.69D-08 BMatP= 4.39D-08
 IDIUse=1 WtCom= 1.00D+00 WtEn= 0.00D+00
 Large coefficients: NSaved= 12 BigCof=   11.72 CofMax=   10.00 Det=-1.75D-12
 Inversion failed.  Reducing to 11 matrices.
 Coeff-Com: -0.378D+01 0.325D+01-0.222D+00 0.779D+00-0.759D+00 0.874D+00
 Coeff-Com:  0.288D+01-0.436D+01 0.141D+01-0.529D+01 0.621D+01
 Coeff:     -0.378D+01 0.325D+01-0.222D+00 0.779D+00-0.759D+00 0.874D+00
 Coeff:      0.288D+01-0.436D+01 0.141D+01-0.529D+01 0.621D+01
 Gap=     0.147 Goal=   None    Shift=    0.000
 Gap=     0.266 Goal=   None    Shift=    0.000
 RMSDP=1.31D-04 MaxDP=9.35D-03 DE= 3.28D-07 OVMax= 1.30D-02

 Cycle  56  Pass 1  IDiag  1:
 RMSU=  2.21D-06    CP:  1.00D+00  3.00D+00  3.00D+00  2.02D+00 -3.00D+00
                    CP:  2.77D-01  1.38D-01  3.00D+00 -3.00D+00 -3.00D+00
                    CP:  9.17D-01  1.14D+00  3.00D+00  3.99D-01  8.84D-01
 E= -732.295974026674     Delta-E=        0.000004198856 Rises=F Damp=F
 DIIS: error= 2.23D-05 at cycle  56 NSaved=  12.
 NSaved=12 IEnMin= 4 EnMin= -732.295983974770     IErMin= 8 ErrMin= 2.08D-05
 ErrMax= 2.23D-05  0.00D+00 EMaxC= 1.00D-01 BMatC= 8.03D-08 BMatP= 4.39D-08
 IDIUse=1 WtCom= 1.00D+00 WtEn= 0.00D+00
 Large coefficients: NSaved= 12 BigCof=   52.55 CofMax=   10.00 Det=-5.13D-13
 Inversion failed.  Reducing to 11 matrices.
 Large coefficients: NSaved= 11 BigCof=   46.65 CofMax=   10.00 Det=-5.91D-13
 Inversion failed.  Reducing to 10 matrices.
 Large coefficients: NSaved= 10 BigCof=   25.68 CofMax=   10.00 Det=-9.86D-13
 Inversion failed.  Reducing to  9 matrices.
 Large coefficients: NSaved=  9 BigCof=   11.76 CofMax=   10.00 Det=-1.53D-12
 Inversion failed.  Reducing to  8 matrices.
 Large coefficients: NSaved=  8 BigCof=   11.10 CofMax=   10.00 Det=-2.05D-12
 Inversion failed.  Reducing to  7 matrices.
 Large coefficients: NSaved=  7 BigCof=   10.82 CofMax=   10.00 Det=-2.38D-12
 Inversion failed.  Reducing to  6 matrices.
 Large coefficients: NSaved=  6 BigCof=   11.03 CofMax=   10.00 Det=-2.40D-12
 Inversion failed.  Reducing to  5 matrices.
 Large coefficients: NSaved=  5 BigCof=   10.30 CofMax=   10.00 Det=-2.44D-12
 Inversion failed.  Reducing to  4 matrices.
 Coeff-Com:  0.582D+00-0.854D+01 0.730D+01 0.167D+01
 Coeff:      0.582D+00-0.854D+01 0.730D+01 0.167D+01
 Gap=     0.147 Goal=   None    Shift=    0.000
 Gap=     0.266 Goal=   None    Shift=    0.000
 RMSDP=6.33D-05 MaxDP=4.84D-03 DE= 4.20D-06 OVMax= 6.58D-03

 Cycle  57  Pass 1  IDiag  1:
 RMSU=  5.00D-07    CP:  1.00D+00  3.00D+00  3.00D+00  1.66D+00 -3.00D+00
                    CP:  4.12D-01  5.01D-02  1.87D+00 -3.00D+00 -1.97D+00
                    CP:  7.14D-01 -1.67D-02  3.63D-01 -4.06D-02 -1.38D+00
                    CP: -1.01D-02
 E= -732.295971960337     Delta-E=        0.000002066337 Rises=F Damp=F
 DIIS: error= 2.20D-05 at cycle  57 NSaved=   5.
 NSaved= 5 IEnMin= 1 EnMin= -732.295983974770     IErMin= 3 ErrMin= 2.13D-05
 ErrMax= 2.20D-05  0.00D+00 EMaxC= 1.00D-01 BMatC= 4.20D-08 BMatP= 4.54D-08
 IDIUse=1 WtCom= 1.00D+00 WtEn= 0.00D+00
 Coeff-Com:  0.637D+00-0.786D+01 0.625D+01 0.162D+01 0.348D+00
 Coeff:      0.637D+00-0.786D+01 0.625D+01 0.162D+01 0.348D+00
 Gap=     0.147 Goal=   None    Shift=    0.000
 Gap=     0.266 Goal=   None    Shift=    0.000
 RMSDP=4.37D-05 MaxDP=3.07D-03 DE= 2.07D-06 OVMax= 4.52D-03

 Cycle  58  Pass 1  IDiag  1:
 RMSU=  1.90D-07    CP:  1.00D+00  3.00D+00  3.00D+00  1.38D+00 -3.00D+00
                    CP:  5.34D-01  1.63D-02  2.02D+00 -3.00D+00 -5.48D-01
                    CP:  2.73D-01 -5.21D-01  2.46D-01 -2.75D-02 -9.24D-01
                    CP: -2.47D-02  8.78D-01
 E= -732.295970504832     Delta-E=        0.000001455505 Rises=F Damp=F
 DIIS: error= 2.22D-05 at cycle  58 NSaved=   6.
 NSaved= 6 IEnMin= 1 EnMin= -732.295983974770     IErMin= 3 ErrMin= 2.13D-05
 ErrMax= 2.22D-05  0.00D+00 EMaxC= 1.00D-01 BMatC= 4.18D-08 BMatP= 4.20D-08
 IDIUse=1 WtCom= 1.00D+00 WtEn= 0.00D+00
 Large coefficients: NSaved=  6 BigCof=   11.99 CofMax=   10.00 Det=-2.28D-12
 Inversion failed.  Reducing to  5 matrices.
 Coeff-Com:  0.105D+00 0.752D+01-0.704D+01 0.116D+01-0.739D+00
 Coeff:      0.105D+00 0.752D+01-0.704D+01 0.116D+01-0.739D+00
 Gap=     0.147 Goal=   None    Shift=    0.000
 Gap=     0.266 Goal=   None    Shift=    0.000
 RMSDP=2.81D-04 MaxDP=1.95D-02 DE= 1.46D-06 OVMax= 2.95D-02

 Cycle  59  Pass 1  IDiag  1:
 RMSU=  1.26D-06    CP:  1.00D+00  3.00D+00  3.00D+00  3.00D+00 -3.00D+00
                    CP:  1.16D-01  3.73D-01  3.00D+00 -3.00D+00 -3.00D+00
                    CP:  3.00D+00  2.75D+00  3.00D+00  1.09D+00 -2.21D+00
                    CP:  9.25D-01 -1.42D+00 -3.32D-01
 E= -732.295979874680     Delta-E=       -0.000009369848 Rises=F Damp=F
 DIIS: error= 2.12D-05 at cycle  59 NSaved=   6.
 NSaved= 6 IEnMin= 1 EnMin= -732.295983974770     IErMin= 6 ErrMin= 2.12D-05
 ErrMax= 2.12D-05  0.00D+00 EMaxC= 1.00D-01 BMatC= 4.14D-08 BMatP= 4.18D-08
 IDIUse=1 WtCom= 1.00D+00 WtEn= 0.00D+00
 Coeff-Com:  0.238D+00 0.722D-01-0.130D+01 0.314D+01-0.258D+01 0.143D+01
 Coeff:      0.238D+00 0.722D-01-0.130D+01 0.314D+01-0.258D+01 0.143D+01
 Gap=     0.147 Goal=   None    Shift=    0.000
 Gap=     0.266 Goal=   None    Shift=    0.000
 RMSDP=7.45D-05 MaxDP=5.08D-03 DE=-9.37D-06 OVMax= 7.76D-03

 Cycle  60  Pass 1  IDiag  1:
 RMSU=  1.37D-06    CP:  1.00D+00  3.00D+00  3.00D+00  3.00D+00 -3.00D+00
                    CP:  1.20D-01  7.45D-01  3.00D+00 -3.00D+00 -3.00D+00
                    CP:  1.31D+00  1.69D+00  3.00D+00  5.86D-01 -1.03D+00
                    CP:  1.38D+00 -1.35D+00 -2.43D+00  6.44D-01
 E= -732.295982339912     Delta-E=       -0.000002465232 Rises=F Damp=F
 DIIS: error= 2.09D-05 at cycle  60 NSaved=   7.
 NSaved= 7 IEnMin= 1 EnMin= -732.295983974770     IErMin= 7 ErrMin= 2.09D-05
 ErrMax= 2.09D-05  0.00D+00 EMaxC= 1.00D-01 BMatC= 4.57D-08 BMatP= 4.14D-08
 IDIUse=1 WtCom= 1.00D+00 WtEn= 0.00D+00
 Coeff-Com:  0.332D+00 0.193D+01-0.301D+01 0.282D+01-0.218D+01 0.184D+01
 Coeff-Com: -0.724D+00
 Coeff:      0.332D+00 0.193D+01-0.301D+01 0.282D+01-0.218D+01 0.184D+01
 Coeff:     -0.724D+00
 Gap=     0.147 Goal=   None    Shift=    0.000
 Gap=     0.266 Goal=   None    Shift=    0.000
 RMSDP=6.61D-05 MaxDP=4.44D-03 DE=-2.47D-06 OVMax= 6.92D-03

 Cycle  61  Pass 1  IDiag  1:
 Restarting incremental Fock formation.
 E= -732.295980143920     Delta-E=        0.000002195991 Rises=F Damp=F
 DIIS: error= 2.11D-05 at cycle  61 NSaved=   8.
 NSaved= 8 IEnMin= 1 EnMin= -732.295983974770     IErMin= 7 ErrMin= 2.09D-05
 ErrMax= 2.11D-05  0.00D+00 EMaxC= 1.00D-01 BMatC= 4.28D-08 BMatP= 4.14D-08
 IDIUse=1 WtCom= 1.00D+00 WtEn= 0.00D+00
 Coeff-Com:  0.550D+00 0.715D+00-0.268D+01 0.379D+01-0.308D+01 0.247D+01
 Coeff-Com: -0.262D+01 0.185D+01
 Coeff:      0.550D+00 0.715D+00-0.268D+01 0.379D+01-0.308D+01 0.247D+01
 Coeff:     -0.262D+01 0.185D+01
 Gap=     0.147 Goal=   None    Shift=    0.000
 Gap=     0.266 Goal=   None    Shift=    0.000
 RMSDP=4.45D-05 MaxDP=2.84D-03 DE= 2.20D-06 OVMax= 4.69D-03

 Cycle  62  Pass 1  IDiag  1:
 RMSU=  4.36D-05    CP:  1.00D+00
 E= -732.295978660570     Delta-E=        0.000001483350 Rises=F Damp=F
 DIIS: error= 2.12D-05 at cycle  62 NSaved=   9.
 NSaved= 9 IEnMin= 1 EnMin= -732.295983974770     IErMin= 7 ErrMin= 2.09D-05
 ErrMax= 2.12D-05  0.00D+00 EMaxC= 1.00D-01 BMatC= 4.93D-08 BMatP= 4.14D-08
 IDIUse=1 WtCom= 1.00D+00 WtEn= 0.00D+00
 Coeff-Com:  0.646D+00 0.716D+01-0.801D+01 0.706D+00 0.467D+00 0.143D+01
 Coeff-Com: -0.684D+00 0.203D+01-0.274D+01
 Coeff:      0.646D+00 0.716D+01-0.801D+01 0.706D+00 0.467D+00 0.143D+01
 Coeff:     -0.684D+00 0.203D+01-0.274D+01
 Gap=     0.147 Goal=   None    Shift=    0.000
 Gap=     0.266 Goal=   None    Shift=    0.000
 RMSDP=2.07D-05 MaxDP=2.77D-03 DE= 1.48D-06 OVMax= 2.68D-03

 Cycle  63  Pass 1  IDiag  1:
 RMSU=  2.06D-05    CP:  1.00D+00  9.67D-01
 E= -732.295978673429     Delta-E=       -0.000000012859 Rises=F Damp=F
 DIIS: error= 2.16D-05 at cycle  63 NSaved=  10.
 NSaved=10 IEnMin= 1 EnMin= -732.295983974770     IErMin= 7 ErrMin= 2.09D-05
 ErrMax= 2.16D-05  0.00D+00 EMaxC= 1.00D-01 BMatC= 6.11D-08 BMatP= 4.14D-08
 IDIUse=1 WtCom= 1.00D+00 WtEn= 0.00D+00
 Large coefficients: NSaved= 10 BigCof=   19.83 CofMax=   10.00 Det=-1.26D-12
 Inversion failed.  Reducing to  9 matrices.
 Large coefficients: NSaved=  9 BigCof=   20.13 CofMax=   10.00 Det=-1.90D-12
 Inversion failed.  Reducing to  8 matrices.
 Large coefficients: NSaved=  8 BigCof=   22.00 CofMax=   10.00 Det=-2.18D-12
 Inversion failed.  Reducing to  7 matrices.
 Coeff-Com:  0.411D+00 0.195D-01-0.757D+00 0.375D+00 0.992D+00-0.133D+01
 Coeff-Com:  0.130D+01
 Coeff:      0.411D+00 0.195D-01-0.757D+00 0.375D+00 0.992D+00-0.133D+01
 Coeff:      0.130D+01
 Gap=     0.147 Goal=   None    Shift=    0.000
 Gap=     0.266 Goal=   None    Shift=    0.000
 RMSDP=1.30D-04 MaxDP=8.86D-03 DE=-1.29D-08 OVMax= 1.34D-02

 Cycle  64  Pass 1  IDiag  1:
 RMSU=  3.40D-06    CP:  1.00D+00 -1.88D+00 -3.12D-01
 E= -732.295982946965     Delta-E=       -0.000004273536 Rises=F Damp=F
 DIIS: error= 2.09D-05 at cycle  64 NSaved=   8.
 NSaved= 8 IEnMin= 1 EnMin= -732.295983974770     IErMin= 8 ErrMin= 2.09D-05
 ErrMax= 2.09D-05  0.00D+00 EMaxC= 1.00D-01 BMatC= 4.12D-08 BMatP= 4.14D-08
 IDIUse=1 WtCom= 1.00D+00 WtEn= 0.00D+00
 Coeff-Com:  0.557D+00-0.620D+00-0.474D+00-0.145D+01 0.180D+01-0.719D+00
 Coeff-Com:  0.132D+01 0.581D+00
 Coeff:      0.557D+00-0.620D+00-0.474D+00-0.145D+01 0.180D+01-0.719D+00
 Coeff:      0.132D+01 0.581D+00
 Gap=     0.147 Goal=   None    Shift=    0.000
 Gap=     0.266 Goal=   None    Shift=    0.000
 RMSDP=5.49D-05 MaxDP=3.58D-03 DE=-4.27D-06 OVMax= 5.79D-03

 Cycle  65  Pass 1  IDiag  1:
 RMSU=  1.29D-06    CP:  1.00D+00 -6.52D-01 -1.41D-01  1.36D+00
 E= -732.295981121571     Delta-E=        0.000001825394 Rises=F Damp=F
 DIIS: error= 2.10D-05 at cycle  65 NSaved=   9.
 NSaved= 9 IEnMin= 1 EnMin= -732.295983974770     IErMin= 8 ErrMin= 2.09D-05
 ErrMax= 2.10D-05  0.00D+00 EMaxC= 1.00D-01 BMatC= 4.09D-08 BMatP= 4.12D-08
 IDIUse=1 WtCom= 1.00D+00 WtEn= 0.00D+00
 Coeff-Com:  0.878D+00-0.120D+01-0.155D+01-0.252D+01 0.249D+01 0.306D-01
 Coeff-Com:  0.264D+01 0.216D+01-0.192D+01
 Coeff:      0.878D+00-0.120D+01-0.155D+01-0.252D+01 0.249D+01 0.306D-01
 Coeff:      0.264D+01 0.216D+01-0.192D+01
 Gap=     0.147 Goal=   None    Shift=    0.000
 Gap=     0.266 Goal=   None    Shift=    0.000
 RMSDP=1.22D-05 MaxDP=8.26D-04 DE= 1.83D-06 OVMax= 1.12D-03

 Cycle  66  Pass 1  IDiag  1:
 RMSU=  3.84D-07    CP:  1.00D+00 -4.07D-01  1.12D-01  8.40D-01  5.67D-01
 E= -732.295980751724     Delta-E=        0.000000369847 Rises=F Damp=F
 DIIS: error= 2.12D-05 at cycle  66 NSaved=  10.
 NSaved=10 IEnMin= 1 EnMin= -732.295983974770     IErMin= 8 ErrMin= 2.09D-05
 ErrMax= 2.12D-05  0.00D+00 EMaxC= 1.00D-01 BMatC= 4.22D-08 BMatP= 4.09D-08
 IDIUse=1 WtCom= 1.00D+00 WtEn= 0.00D+00
 Coeff-Com:  0.114D+01-0.129D+01-0.303D+01-0.300D+01 0.247D+01 0.688D+00
 Coeff-Com:  0.367D+01 0.334D+01-0.452D+01 0.152D+01
 Coeff:      0.114D+01-0.129D+01-0.303D+01-0.300D+01 0.247D+01 0.688D+00
 Coeff:      0.367D+01 0.334D+01-0.452D+01 0.152D+01
 Gap=     0.147 Goal=   None    Shift=    0.000
 Gap=     0.266 Goal=   None    Shift=    0.000
 RMSDP=9.58D-06 MaxDP=6.23D-04 DE= 3.70D-07 OVMax= 7.87D-04

 Cycle  67  Pass 1  IDiag  1:
 RMSU=  1.84D-07    CP:  1.00D+00 -2.31D-01  3.65D-01  3.71D-01  1.25D-01
                    CP:  2.82D+00
 E= -732.295980484214     Delta-E=        0.000000267510 Rises=F Damp=F
 DIIS: error= 2.13D-05 at cycle  67 NSaved=  11.
 NSaved=11 IEnMin= 1 EnMin= -732.295983974770     IErMin= 8 ErrMin= 2.09D-05
 ErrMax= 2.13D-05  0.00D+00 EMaxC= 1.00D-01 BMatC= 4.43D-08 BMatP= 4.09D-08
 IDIUse=1 WtCom= 1.00D+00 WtEn= 0.00D+00
 Coeff-Com:  0.104D+01-0.608D+00-0.324D+01-0.237D+01 0.187D+01 0.403D+00
 Coeff-Com:  0.323D+01 0.282D+01-0.437D+01 0.135D+01 0.867D+00
 Coeff:      0.104D+01-0.608D+00-0.324D+01-0.237D+01 0.187D+01 0.403D+00
 Coeff:      0.323D+01 0.282D+01-0.437D+01 0.135D+01 0.867D+00
 Gap=     0.147 Goal=   None    Shift=    0.000
 Gap=     0.266 Goal=   None    Shift=    0.000
 RMSDP=2.41D-06 MaxDP=1.45D-04 DE= 2.68D-07 OVMax= 2.20D-04

 Cycle  68  Pass 1  IDiag  1:
 RMSU=  4.88D-07    CP:  1.00D+00 -1.93D-01  4.39D-01  2.28D-01  1.96D-02
                    CP:  3.00D+00  2.40D+00
 E= -732.295980425004     Delta-E=        0.000000059210 Rises=F Damp=F
 DIIS: error= 2.13D-05 at cycle  68 NSaved=  12.
 NSaved=12 IEnMin= 1 EnMin= -732.295983974770     IErMin= 8 ErrMin= 2.09D-05
 ErrMax= 2.13D-05  0.00D+00 EMaxC= 1.00D-01 BMatC= 4.37D-08 BMatP= 4.09D-08
 IDIUse=1 WtCom= 1.00D+00 WtEn= 0.00D+00
 Coeff-Com:  0.111D+01-0.514D+00-0.365D+01-0.220D+01 0.190D+01 0.258D+00
 Coeff-Com:  0.350D+01 0.301D+01-0.479D+01 0.178D+01 0.320D+01-0.260D+01
 Coeff:      0.111D+01-0.514D+00-0.365D+01-0.220D+01 0.190D+01 0.258D+00
 Coeff:      0.350D+01 0.301D+01-0.479D+01 0.178D+01 0.320D+01-0.260D+01
 Gap=     0.147 Goal=   None    Shift=    0.000
 Gap=     0.266 Goal=   None    Shift=    0.000
 RMSDP=2.62D-05 MaxDP=1.76D-03 DE= 5.92D-08 OVMax= 2.62D-03

 Cycle  69  Pass 1  IDiag  1:
 RMSU=  3.71D-07    CP:  1.00D+00 -7.60D-01  1.16D-01  6.92D-01  2.19D-01
                    CP:  2.03D-01 -1.36D+00 -1.99D-01
 E= -732.295981271712     Delta-E=       -0.000000846708 Rises=F Damp=F
 DIIS: error= 2.12D-05 at cycle  69 NSaved=  13.
 NSaved=13 IEnMin= 1 EnMin= -732.295983974770     IErMin= 8 ErrMin= 2.09D-05
 ErrMax= 2.12D-05  0.00D+00 EMaxC= 1.00D-01 BMatC= 4.43D-08 BMatP= 4.09D-08
 IDIUse=1 WtCom= 1.00D+00 WtEn= 0.00D+00
 Coeff-Com:  0.111D+01-0.378D+00-0.372D+01-0.211D+01 0.185D+01 0.155D+00
 Coeff-Com:  0.343D+01 0.291D+01-0.478D+01 0.177D+01 0.367D+01-0.338D+01
 Coeff-Com:  0.473D+00
 Coeff:      0.111D+01-0.378D+00-0.372D+01-0.211D+01 0.185D+01 0.155D+00
 Coeff:      0.343D+01 0.291D+01-0.478D+01 0.177D+01 0.367D+01-0.338D+01
 Coeff:      0.473D+00
 Gap=     0.147 Goal=   None    Shift=    0.000
 Gap=     0.266 Goal=   None    Shift=    0.000
 RMSDP=1.37D-05 MaxDP=9.18D-04 DE=-8.47D-07 OVMax= 1.35D-03

 Cycle  70  Pass 1  IDiag  1:
 RMSU=  7.68D-08    CP:  1.00D+00 -1.05D+00 -6.87D-02  9.69D-01  3.21D-01
                    CP: -1.95D+00 -3.00D+00 -3.64D-01  1.70D+00
 E= -732.295981710534     Delta-E=       -0.000000438821 Rises=F Damp=F
 DIIS: error= 2.12D-05 at cycle  70 NSaved=  14.
 NSaved=14 IEnMin= 1 EnMin= -732.295983974770     IErMin= 8 ErrMin= 2.09D-05
 ErrMax= 2.12D-05  0.00D+00 EMaxC= 1.00D-01 BMatC= 4.42D-08 BMatP= 4.09D-08
 IDIUse=1 WtCom= 1.00D+00 WtEn= 0.00D+00
 Large coefficients: NSaved= 14 BigCof=   13.09 CofMax=   10.00 Det=-1.07D-12
 Inversion failed.  Reducing to 13 matrices.
 Large coefficients: NSaved= 13 BigCof=   12.38 CofMax=   10.00 Det=-1.27D-12
 Inversion failed.  Reducing to 12 matrices.
 Large coefficients: NSaved= 12 BigCof=   11.11 CofMax=   10.00 Det=-1.44D-12
 Inversion failed.  Reducing to 11 matrices.
 Coeff-Com:  0.310D+00 0.303D+00-0.194D+01 0.855D+00-0.941D-01 0.296D+00
 Coeff-Com: -0.274D+00-0.401D+00 0.236D+01 0.321D+01-0.363D+01
 Coeff:      0.310D+00 0.303D+00-0.194D+01 0.855D+00-0.941D-01 0.296D+00
 Coeff:     -0.274D+00-0.401D+00 0.236D+01 0.321D+01-0.363D+01
 Gap=     0.147 Goal=   None    Shift=    0.000
 Gap=     0.266 Goal=   None    Shift=    0.000
 RMSDP=1.89D-04 MaxDP=1.27D-02 DE=-4.39D-07 OVMax= 1.94D-02

 Cycle  71  Pass 1  IDiag  1:
 RMSU=  7.43D-06    CP:  1.00D+00  3.00D+00  1.41D+00 -5.41D-01 -1.34D+00
                    CP:  3.00D+00  3.00D+00  3.00D+00 -2.04D+00 -3.00D+00
 E= -732.295975468260     Delta-E=        0.000006242273 Rises=F Damp=F
 DIIS: error= 2.16D-05 at cycle  71 NSaved=  12.
 NSaved=12 IEnMin= 1 EnMin= -732.295983974770     IErMin= 5 ErrMin= 2.09D-05
 ErrMax= 2.16D-05  0.00D+00 EMaxC= 1.00D-01 BMatC= 4.51D-08 BMatP= 4.09D-08
 IDIUse=1 WtCom= 1.00D+00 WtEn= 0.00D+00
 Coeff-Com:  0.304D+00 0.756D-01-0.182D+01 0.171D+01-0.922D+00 0.377D+01
 Coeff-Com: -0.117D+01-0.362D+01 0.836D+01 0.473D+01-0.873D+01-0.169D+01
 Coeff:      0.304D+00 0.756D-01-0.182D+01 0.171D+01-0.922D+00 0.377D+01
 Coeff:     -0.117D+01-0.362D+01 0.836D+01 0.473D+01-0.873D+01-0.169D+01
 Gap=     0.147 Goal=   None    Shift=    0.000
 Gap=     0.266 Goal=   None    Shift=    0.000
 RMSDP=9.30D-05 MaxDP=6.39D-03 DE= 6.24D-06 OVMax= 9.57D-03

 Cycle  72  Pass 1  IDiag  1:
 RMSU=  3.80D-06    CP:  1.00D+00  1.09D+00  5.81D-01 -4.36D-02  1.76D-01
                    CP:  3.00D+00  3.00D+00  3.00D+00 -2.82D+00 -3.00D+00
                    CP:  2.97D-01
 E= -732.295978525132     Delta-E=       -0.000003056872 Rises=F Damp=F
 DIIS: error= 2.10D-05 at cycle  72 NSaved=  13.
 NSaved=13 IEnMin= 1 EnMin= -732.295983974770     IErMin= 5 ErrMin= 2.09D-05
 ErrMax= 2.10D-05  0.00D+00 EMaxC= 1.00D-01 BMatC= 5.54D-08 BMatP= 4.09D-08
 IDIUse=1 WtCom= 1.00D+00 WtEn= 0.00D+00
 Large coefficients: NSaved= 13 BigCof=   46.54 CofMax=   10.00 Det=-7.09D-13
 Inversion failed.  Reducing to 12 matrices.
 Large coefficients: NSaved= 12 BigCof=   43.48 CofMax=   10.00 Det=-7.34D-13
 Inversion failed.  Reducing to 11 matrices.
 Large coefficients: NSaved= 11 BigCof=   18.12 CofMax=   10.00 Det=-9.88D-13
 Inversion failed.  Reducing to 10 matrices.
 Large coefficients: NSaved= 10 BigCof=   19.92 CofMax=   10.00 Det=-1.01D-12
 Inversion failed.  Reducing to  9 matrices.
 Coeff-Com:  0.206D+00-0.357D+00-0.513D+00 0.140D+01-0.201D+00 0.929D+01
 Coeff-Com: -0.813D+01-0.137D+01 0.669D+00
 Coeff:      0.206D+00-0.357D+00-0.513D+00 0.140D+01-0.201D+00 0.929D+01
 Coeff:     -0.813D+01-0.137D+01 0.669D+00
 Gap=     0.147 Goal=   None    Shift=    0.000
 Gap=     0.266 Goal=   None    Shift=    0.000
 RMSDP=1.40D-04 MaxDP=9.37D-03 DE=-3.06D-06 OVMax= 1.46D-02

 Cycle  73  Pass 1  IDiag  1:
 RMSU=  6.25D-07    CP:  1.00D+00 -2.02D+00 -4.71D-01  1.05D+00 -2.37D-02
                    CP:  3.00D+00  3.00D+00  2.97D+00 -1.79D+00 -1.78D+00
                    CP:  2.49D-02  7.54D-02
 E= -732.295983162153     Delta-E=       -0.000004637021 Rises=F Damp=F
 DIIS: error= 2.06D-05 at cycle  73 NSaved=  10.
 NSaved=10 IEnMin= 1 EnMin= -732.295983974770     IErMin=10 ErrMin= 2.06D-05
 ErrMax= 2.06D-05  0.00D+00 EMaxC= 1.00D-01 BMatC= 4.87D-08 BMatP= 4.09D-08
 IDIUse=1 WtCom= 1.00D+00 WtEn= 0.00D+00
 Large coefficients: NSaved= 10 BigCof=   24.13 CofMax=   10.00 Det=-9.83D-13
 Inversion failed.  Reducing to  9 matrices.
 Large coefficients: NSaved=  9 BigCof=   13.36 CofMax=   10.00 Det=-1.39D-12
 Inversion failed.  Reducing to  8 matrices.
 Large coefficients: NSaved=  8 BigCof=   13.09 CofMax=   10.00 Det=-1.41D-12
 Inversion failed.  Reducing to  7 matrices.
 Large coefficients: NSaved=  7 BigCof=   13.18 CofMax=   10.00 Det=-1.52D-12
 Inversion failed.  Reducing to  6 matrices.
 Coeff-Com:  0.299D+00-0.104D+01-0.344D+00 0.190D+01-0.338D+00 0.523D+00
 Coeff:      0.299D+00-0.104D+01-0.344D+00 0.190D+01-0.338D+00 0.523D+00
 Gap=     0.147 Goal=   None    Shift=    0.000
 Gap=     0.266 Goal=   None    Shift=    0.000
 RMSDP=1.31D-05 MaxDP=1.23D-03 DE=-4.64D-06 OVMax= 1.66D-03

 Cycle  74  Pass 1  IDiag  1:
 RMSU=  3.77D-07    CP:  1.00D+00 -2.10D+00 -9.48D-01  2.45D+00  9.89D-01
                    CP: -3.00D+00 -3.00D+00 -3.00D+00  1.80D+00  3.00D+00
                    CP: -5.36D-02 -1.89D-01 -3.31D-01
 E= -732.295983290578     Delta-E=       -0.000000128425 Rises=F Damp=F
 DIIS: error= 2.09D-05 at cycle  74 NSaved=   7.
 NSaved= 7 IEnMin= 1 EnMin= -732.295983974770     IErMin= 6 ErrMin= 2.06D-05
 ErrMax= 2.09D-05  0.00D+00 EMaxC= 1.00D-01 BMatC= 4.12D-08 BMatP= 4.12D-08
 IDIUse=1 WtCom= 1.00D+00 WtEn= 0.00D+00
 Coeff-Com:  0.301D+00-0.101D+01-0.347D+00 0.182D+01-0.403D+00 0.514D+00
 Coeff-Com:  0.128D+00
 Coeff:      0.301D+00-0.101D+01-0.347D+00 0.182D+01-0.403D+00 0.514D+00
 Coeff:      0.128D+00
 Gap=     0.147 Goal=   None    Shift=    0.000
 Gap=     0.266 Goal=   None    Shift=    0.000
 RMSDP=1.28D-05 MaxDP=8.53D-04 DE=-1.28D-07 OVMax= 1.28D-03

 Cycle  75  Pass 1  IDiag  1:
 RMSU=  8.54D-08    CP:  1.00D+00 -2.38D+00 -1.11D+00  2.69D+00  9.53D-01
                    CP: -3.00D+00 -3.00D+00 -3.00D+00  1.96D+00  3.00D+00
                    CP: -1.09D-01 -3.79D-01 -1.16D-01  1.06D+00
 E= -732.295983703067     Delta-E=       -0.000000412489 Rises=F Damp=F
 DIIS: error= 2.08D-05 at cycle  75 NSaved=   8.
 NSaved= 8 IEnMin= 1 EnMin= -732.295983974770     IErMin= 6 ErrMin= 2.06D-05
 ErrMax= 2.08D-05  0.00D+00 EMaxC= 1.00D-01 BMatC= 4.13D-08 BMatP= 4.12D-08
 IDIUse=1 WtCom= 1.00D+00 WtEn= 0.00D+00
 Large coefficients: NSaved=  8 BigCof=   24.72 CofMax=   10.00 Det=-1.20D-12
 Inversion failed.  Reducing to  7 matrices.
 Large coefficients: NSaved=  7 BigCof=   22.11 CofMax=   10.00 Det=-1.30D-12
 Inversion failed.  Reducing to  6 matrices.
 Large coefficients: NSaved=  6 BigCof=   11.83 CofMax=   10.00 Det=-1.47D-12
 Inversion failed.  Reducing to  5 matrices.
 Large coefficients: NSaved=  5 BigCof=   12.54 CofMax=   10.00 Det=-1.51D-12
 Inversion failed.  Reducing to  4 matrices.
 Coeff-Com:  0.233D-01 0.718D-01 0.832D+01-0.741D+01
 Coeff:      0.233D-01 0.718D-01 0.832D+01-0.741D+01
 Gap=     0.147 Goal=   None    Shift=    0.000
 Gap=     0.266 Goal=   None    Shift=    0.000
 RMSDP=1.04D-04 MaxDP=6.96D-03 DE=-4.12D-07 OVMax= 1.03D-02

 Cycle  76  Pass 1  IDiag  1:
 RMSU=  2.63D-07    CP:  1.00D+00 -1.38D-01  2.22D-01  5.90D-01  5.32D-01
                    CP:  3.00D+00  3.00D+00  3.00D+00 -1.48D+00 -3.00D+00
                    CP:  4.57D-02  1.41D-01  7.90D-01 -4.44D-02  1.59D-01
 E= -732.295980356917     Delta-E=        0.000003346150 Rises=F Damp=F
 DIIS: error= 2.10D-05 at cycle  76 NSaved=   5.
 NSaved= 5 IEnMin= 1 EnMin= -732.295983974770     IErMin= 2 ErrMin= 2.06D-05
 ErrMax= 2.10D-05  0.00D+00 EMaxC= 1.00D-01 BMatC= 4.22D-08 BMatP= 4.12D-08
 IDIUse=1 WtCom= 1.00D+00 WtEn= 0.00D+00
 Large coefficients: NSaved=  5 BigCof=   23.16 CofMax=   10.00 Det=-1.02D-12
 Inversion failed.  Reducing to  4 matrices.
 Large coefficients: NSaved=  4 BigCof=   21.43 CofMax=   10.00 Det=-1.16D-12
 Inversion failed.  Reducing to  3 matrices.
 Coeff-Com: -0.256D-01 0.647D+00 0.379D+00
 Coeff:     -0.256D-01 0.647D+00 0.379D+00
 Gap=     0.147 Goal=   None    Shift=    0.000
 Gap=     0.266 Goal=   None    Shift=    0.000
 RMSDP=6.72D-05 MaxDP=4.51D-03 DE= 3.35D-06 OVMax= 6.74D-03

 Cycle  77  Pass 1  IDiag  1:
 RMSU=  1.62D-07    CP:  1.00D+00 -1.59D+00 -5.87D-01  1.91D+00  9.72D-01
                    CP: -3.00D+00 -3.00D+00 -1.02D+00  1.20D+00  2.37D+00
                    CP:  3.55D-03 -1.05D-03  5.23D-02  6.09D-01  6.37D-01
                    CP:  4.07D-01
 E= -732.295982534593     Delta-E=       -0.000002177675 Rises=F Damp=F
 DIIS: error= 2.09D-05 at cycle  77 NSaved=   4.
 NSaved= 4 IEnMin= 1 EnMin= -732.295983974770     IErMin= 2 ErrMin= 2.08D-05
 ErrMax= 2.09D-05  0.00D+00 EMaxC= 1.00D-01 BMatC= 4.10D-08 BMatP= 4.13D-08
 IDIUse=1 WtCom= 1.00D+00 WtEn= 0.00D+00
 Coeff-Com: -0.267D-02 0.882D-01 0.166D+00 0.748D+00
 Coeff:     -0.267D-02 0.882D-01 0.166D+00 0.748D+00
 Gap=     0.147 Goal=   None    Shift=    0.000
 Gap=     0.266 Goal=   None    Shift=    0.000
 RMSDP=4.81D-06 MaxDP=3.17D-04 DE=-2.18D-06 OVMax= 4.68D-04

 Cycle  78  Pass 1  IDiag  1:
 RMSU=  3.63D-08    CP:  1.00D+00 -1.49D+00 -5.24D-01  1.76D+00  9.26D-01
                    CP: -2.88D+00 -2.52D+00 -3.18D-01  1.07D+00  2.11D+00
                    CP:  7.01D-03  9.17D-03  1.64D-01  5.46D-01  8.11D-01
                    CP:  5.14D-01  1.12D+00
 E= -732.295982381382     Delta-E=        0.000000153210 Rises=F Damp=F
 DIIS: error= 2.09D-05 at cycle  78 NSaved=   5.
 NSaved= 5 IEnMin= 1 EnMin= -732.295983974770     IErMin= 2 ErrMin= 2.08D-05
 ErrMax= 2.09D-05  0.00D+00 EMaxC= 1.00D-01 BMatC= 4.10D-08 BMatP= 4.10D-08
 IDIUse=1 WtCom= 1.00D+00 WtEn= 0.00D+00
 Coeff-Com:  0.666D-03-0.230D-01 0.118D+00 0.645D+00 0.259D+00
 Coeff:      0.666D-03-0.230D-01 0.118D+00 0.645D+00 0.259D+00
 Gap=     0.147 Goal=   None    Shift=    0.000
 Gap=     0.266 Goal=   None    Shift=    0.000
 RMSDP=1.88D-06 MaxDP=1.24D-04 DE= 1.53D-07 OVMax= 1.81D-04

 Cycle  79  Pass 1  IDiag  1:
 RMSU=  6.98D-09    CP:  1.00D+00 -1.45D+00 -4.96D-01  1.70D+00  9.04D-01
                    CP: -2.50D+00 -2.18D+00 -2.87D-01  9.40D-01  1.96D+00
                    CP:  6.75D-03  8.23D-03  1.53D-01  5.50D-01  8.07D-01
                    CP:  5.22D-01  1.14D+00  1.15D+00
 E= -732.295982321843     Delta-E=        0.000000059540 Rises=F Damp=F
 DIIS: error= 2.09D-05 at cycle  79 NSaved=   6.
 NSaved= 6 IEnMin= 1 EnMin= -732.295983974770     IErMin= 2 ErrMin= 2.08D-05
 ErrMax= 2.09D-05  0.00D+00 EMaxC= 1.00D-01 BMatC= 4.10D-08 BMatP= 4.10D-08
 IDIUse=1 WtCom= 1.00D+00 WtEn= 0.00D+00
 Large coefficients: NSaved=  6 BigCof=   10.23 CofMax=   10.00 Det=-2.09D-13
 Inversion failed.  Reducing to  5 matrices.
 Coeff-Com: -0.800D-02-0.795D-01-0.195D+00-0.608D+01 0.736D+01
 Coeff:     -0.800D-02-0.795D-01-0.195D+00-0.608D+01 0.736D+01
 Gap=     0.147 Goal=   None    Shift=    0.000
 Gap=     0.266 Goal=   None    Shift=    0.000
 RMSDP=1.34D-05 MaxDP=8.86D-04 DE= 5.95D-08 OVMax= 1.26D-03

 Cycle  80  Pass 1  IDiag  1:
 RMSU=  5.07D-08    CP:  1.00D+00 -1.17D+00 -2.73D-01  1.24D+00  6.58D-01
                    CP:  4.46D-01  3.71D-01 -8.85D-02  8.82D-02  1.22D+00
                    CP:  5.52D-03  3.01D-03  9.08D-02  6.08D-01  8.29D-01
                    CP:  6.20D-01  1.30D+00  2.62D+00  3.00D+00
 E= -732.295981904541     Delta-E=        0.000000417302 Rises=F Damp=F
 DIIS: error= 2.10D-05 at cycle  80 NSaved=   6.
 NSaved= 6 IEnMin= 1 EnMin= -732.295983974770     IErMin= 2 ErrMin= 2.08D-05
 ErrMax= 2.10D-05  0.00D+00 EMaxC= 1.00D-01 BMatC= 4.09D-08 BMatP= 4.10D-08
 IDIUse=1 WtCom= 1.00D+00 WtEn= 0.00D+00
 Coeff-Com: -0.144D-01 0.438D+00 0.556D+00-0.124D+01-0.135D+01 0.261D+01
 Coeff:     -0.144D-01 0.438D+00 0.556D+00-0.124D+01-0.135D+01 0.261D+01
 Gap=     0.147 Goal=   None    Shift=    0.000
 Gap=     0.266 Goal=   None    Shift=    0.000
 RMSDP=2.66D-06 MaxDP=2.80D-04 DE= 4.17D-07 OVMax= 2.94D-04

 Cycle  81  Pass 1  IDiag  1:
 Restarting incremental Fock formation.
 E= -732.295981967039     Delta-E=       -0.000000062498 Rises=F Damp=F
 DIIS: error= 2.11D-05 at cycle  81 NSaved=   7.
 NSaved= 7 IEnMin= 1 EnMin= -732.295983974770     IErMin= 2 ErrMin= 2.08D-05
 ErrMax= 2.11D-05  0.00D+00 EMaxC= 1.00D-01 BMatC= 4.09D-08 BMatP= 4.09D-08
 IDIUse=1 WtCom= 1.00D+00 WtEn= 0.00D+00
 Large coefficients: NSaved=  7 BigCof=   26.01 CofMax=   10.00 Det=-6.00D-14
 Inversion failed.  Reducing to  6 matrices.
 Coeff-Com: -0.174D-01 0.545D+00 0.207D+00-0.238D+01 0.201D+01 0.642D+00
 Coeff:     -0.174D-01 0.545D+00 0.207D+00-0.238D+01 0.201D+01 0.642D+00
 Gap=     0.147 Goal=   None    Shift=    0.000
 Gap=     0.266 Goal=   None    Shift=    0.000
 RMSDP=1.73D-06 MaxDP=1.80D-04 DE=-6.25D-08 OVMax= 2.32D-04

 Cycle  82  Pass 1  IDiag  1:
 RMSU=  1.72D-06    CP:  1.00D+00
 E= -732.295981990435     Delta-E=       -0.000000023396 Rises=F Damp=F
 DIIS: error= 2.11D-05 at cycle  82 NSaved=   7.
 NSaved= 7 IEnMin= 1 EnMin= -732.295983974770     IErMin= 2 ErrMin= 2.08D-05
 ErrMax= 2.11D-05  0.00D+00 EMaxC= 1.00D-01 BMatC= 4.09D-08 BMatP= 4.09D-08
 IDIUse=1 WtCom= 1.00D+00 WtEn= 0.00D+00
 Coeff-Com: -0.362D-01 0.863D+00 0.315D+00-0.488D+01 0.494D+01 0.150D+01
 Coeff-Com: -0.171D+01
 Coeff:     -0.362D-01 0.863D+00 0.315D+00-0.488D+01 0.494D+01 0.150D+01
 Coeff:     -0.171D+01
 Gap=     0.147 Goal=   None    Shift=    0.000
 Gap=     0.266 Goal=   None    Shift=    0.000
 RMSDP=2.07D-05 MaxDP=1.40D-03 DE=-2.34D-08 OVMax= 2.15D-03

 Cycle  83  Pass 1  IDiag  1:
 RMSU=  2.00D-05    CP:  1.00D+00 -1.32D+00
 E= -732.295981306790     Delta-E=        0.000000683645 Rises=F Damp=F
 DIIS: error= 2.11D-05 at cycle  83 NSaved=   8.
 NSaved= 8 IEnMin= 1 EnMin= -732.295983974770     IErMin= 2 ErrMin= 2.08D-05
 ErrMax= 2.11D-05  0.00D+00 EMaxC= 1.00D-01 BMatC= 4.09D-08 BMatP= 4.09D-08
 IDIUse=1 WtCom= 1.00D+00 WtEn= 0.00D+00
 Large coefficients: NSaved=  8 BigCof=   11.55 CofMax=   10.00 Det=-6.03D-13
 Inversion failed.  Reducing to  7 matrices.
 Large coefficients: NSaved=  7 BigCof=   10.66 CofMax=   10.00 Det=-1.86D-12
 Inversion failed.  Reducing to  6 matrices.
 Coeff-Com: -0.411D-02 0.646D+00 0.118D+01-0.249D+01-0.611D+01 0.778D+01
 Coeff:     -0.411D-02 0.646D+00 0.118D+01-0.249D+01-0.611D+01 0.778D+01
 Gap=     0.147 Goal=   None    Shift=    0.000
 Gap=     0.266 Goal=   None    Shift=    0.000
 RMSDP=1.14D-04 MaxDP=7.80D-03 DE= 6.84D-07 OVMax= 1.18D-02

 Cycle  84  Pass 1  IDiag  1:
 RMSU=  7.23D-05    CP:  1.00D+00 -3.00D+00  3.00D+00
 E= -732.295977554488     Delta-E=        0.000003752302 Rises=F Damp=F
 DIIS: error= 2.10D-05 at cycle  84 NSaved=   7.
 NSaved= 7 IEnMin= 1 EnMin= -732.295983974770     IErMin= 2 ErrMin= 2.08D-05
 ErrMax= 2.10D-05  0.00D+00 EMaxC= 1.00D-01 BMatC= 4.18D-08 BMatP= 4.09D-08
 IDIUse=1 WtCom= 1.00D+00 WtEn= 0.00D+00
 Large coefficients: NSaved=  7 BigCof=   11.71 CofMax=   10.00 Det=-2.18D-12
 Inversion failed.  Reducing to  6 matrices.
 Coeff-Com: -0.184D-01 0.576D+00 0.254D+00-0.155D+01 0.153D+01 0.208D+00
 Coeff:     -0.184D-01 0.576D+00 0.254D+00-0.155D+01 0.153D+01 0.208D+00
 Gap=     0.147 Goal=   None    Shift=    0.000
 Gap=     0.266 Goal=   None    Shift=    0.000
 RMSDP=9.22D-05 MaxDP=6.31D-03 DE= 3.75D-06 OVMax= 9.65D-03

 Cycle  85  Pass 1  IDiag  1:
 RMSU=  2.76D-07    CP:  1.00D+00 -2.02D+00  2.08D+00  2.54D-05
 E= -732.295980607990     Delta-E=       -0.000003053502 Rises=F Damp=F
 DIIS: error= 2.12D-05 at cycle  85 NSaved=   7.
 NSaved= 7 IEnMin= 1 EnMin= -732.295983974770     IErMin= 2 ErrMin= 2.08D-05
 ErrMax= 2.12D-05  0.00D+00 EMaxC= 1.00D-01 BMatC= 4.08D-08 BMatP= 4.09D-08
 IDIUse=1 WtCom= 1.00D+00 WtEn= 0.00D+00
 Coeff-Com:  0.466D-01 0.275D+00-0.556D+00 0.120D+01-0.431D+01-0.229D+00
 Coeff-Com:  0.457D+01
 Coeff:      0.466D-01 0.275D+00-0.556D+00 0.120D+01-0.431D+01-0.229D+00
 Coeff:      0.457D+01
 Gap=     0.147 Goal=   None    Shift=    0.000
 Gap=     0.266 Goal=   None    Shift=    0.000
 RMSDP=4.46D-06 MaxDP=2.75D-04 DE=-3.05D-06 OVMax= 3.54D-04

 Cycle  86  Pass 1  IDiag  1:
 RMSU=  3.61D-07    CP:  1.00D+00 -1.48D+00  2.30D+00  6.39D-05  1.12D-01
 E= -732.295980482598     Delta-E=        0.000000125392 Rises=F Damp=F
 DIIS: error= 2.12D-05 at cycle  86 NSaved=   8.
 NSaved= 8 IEnMin= 1 EnMin= -732.295983974770     IErMin= 2 ErrMin= 2.08D-05
 ErrMax= 2.12D-05  0.00D+00 EMaxC= 1.00D-01 BMatC= 4.09D-08 BMatP= 4.08D-08
 IDIUse=1 WtCom= 1.00D+00 WtEn= 0.00D+00
 Coeff-Com:  0.607D-01 0.388D+00-0.383D+00 0.765D+00-0.438D+01-0.345D+00
 Coeff-Com:  0.553D+01-0.641D+00
 Coeff:      0.607D-01 0.388D+00-0.383D+00 0.765D+00-0.438D+01-0.345D+00
 Coeff:      0.553D+01-0.641D+00
 Gap=     0.147 Goal=   None    Shift=    0.000
 Gap=     0.266 Goal=   None    Shift=    0.000
 RMSDP=1.05D-05 MaxDP=7.17D-04 DE= 1.25D-07 OVMax= 1.08D-03

 Cycle  87  Pass 1  IDiag  1:
 RMSU=  3.83D-08    CP:  1.00D+00 -5.39D-01  1.79D+00  4.25D-05 -2.04D-01
                    CP:  8.65D-01
 E= -732.295980826855     Delta-E=       -0.000000344257 Rises=F Damp=F
 DIIS: error= 2.13D-05 at cycle  87 NSaved=   9.
 NSaved= 9 IEnMin= 1 EnMin= -732.295983974770     IErMin= 2 ErrMin= 2.08D-05
 ErrMax= 2.13D-05  0.00D+00 EMaxC= 1.00D-01 BMatC= 4.09D-08 BMatP= 4.08D-08
 IDIUse=1 WtCom= 1.00D+00 WtEn= 0.00D+00
 Large coefficients: NSaved=  9 BigCof=   11.98 CofMax=   10.00 Det=-9.38D-13
 Inversion failed.  Reducing to  8 matrices.
 Coeff-Com:  0.331D-01 0.497D+00-0.205D+00 0.409D-01-0.341D+01 0.457D+01
 Coeff-Com: -0.116D+01 0.629D+00
 Coeff:      0.331D-01 0.497D+00-0.205D+00 0.409D-01-0.341D+01 0.457D+01
 Coeff:     -0.116D+01 0.629D+00
 Gap=     0.147 Goal=   None    Shift=    0.000
 Gap=     0.266 Goal=   None    Shift=    0.000
 RMSDP=2.67D-05 MaxDP=1.83D-03 DE=-3.44D-07 OVMax= 2.73D-03

 Cycle  88  Pass 1  IDiag  1:
 RMSU=  4.28D-07    CP:  1.00D+00 -2.89D+00  3.00D+00  2.29D-02  1.08D+00
                    CP:  5.98D-01 -7.06D-01
 E= -732.295979953977     Delta-E=        0.000000872878 Rises=F Damp=F
 DIIS: error= 2.13D-05 at cycle  88 NSaved=   9.
 NSaved= 9 IEnMin= 1 EnMin= -732.295983974770     IErMin= 2 ErrMin= 2.08D-05
 ErrMax= 2.13D-05  0.00D+00 EMaxC= 1.00D-01 BMatC= 4.09D-08 BMatP= 4.08D-08
 IDIUse=1 WtCom= 1.00D+00 WtEn= 0.00D+00
 Large coefficients: NSaved=  9 BigCof=   26.03 CofMax=   10.00 Det=-4.92D-13
 Inversion failed.  Reducing to  8 matrices.
 Coeff-Com:  0.571D-01 0.202D-01-0.717D+00 0.261D+01-0.716D+01 0.536D+01
 Coeff-Com: -0.103D+01 0.186D+01
 Coeff:      0.571D-01 0.202D-01-0.717D+00 0.261D+01-0.716D+01 0.536D+01
 Coeff:     -0.103D+01 0.186D+01
 Gap=     0.147 Goal=   None    Shift=    0.000
 Gap=     0.266 Goal=   None    Shift=    0.000
 RMSDP=6.59D-05 MaxDP=4.53D-03 DE= 8.73D-07 OVMax= 6.76D-03

 Cycle  89  Pass 1  IDiag  1:
 RMSU=  4.66D-06    CP:  1.00D+00 -3.00D+00  3.00D+00  9.14D-01  1.80D+00
                    CP:  1.81D-01  2.59D+00  3.00D+00
 E= -732.295977791824     Delta-E=        0.000002162153 Rises=F Damp=F
 DIIS: error= 2.12D-05 at cycle  89 NSaved=   9.
 NSaved= 9 IEnMin= 1 EnMin= -732.295983974770     IErMin= 2 ErrMin= 2.08D-05
 ErrMax= 2.12D-05  0.00D+00 EMaxC= 1.00D-01 BMatC= 4.10D-08 BMatP= 4.08D-08
 IDIUse=1 WtCom= 1.00D+00 WtEn= 0.00D+00
 Coeff-Com:  0.286D-02-0.179D+00-0.735D+00 0.212D+01-0.419D+01 0.268D+01
 Coeff-Com: -0.547D+01 0.355D+01 0.323D+01
 Coeff:      0.286D-02-0.179D+00-0.735D+00 0.212D+01-0.419D+01 0.268D+01
 Coeff:     -0.547D+01 0.355D+01 0.323D+01
 Gap=     0.147 Goal=   None    Shift=    0.000
 Gap=     0.266 Goal=   None    Shift=    0.000
 RMSDP=3.28D-04 MaxDP=2.31D-02 DE= 2.16D-06 OVMax= 3.32D-02

 Cycle  90  Pass 1  IDiag  1:
 RMSU=  1.72D-04    CP:  9.99D-01 -3.00D+00  3.00D+00  3.00D+00  3.00D+00
                    CP:  3.00D+00 -3.00D+00  3.00D+00  3.00D+00
 E= -732.295966973489     Delta-E=        0.000010818336 Rises=F Damp=F
 DIIS: error= 2.08D-05 at cycle  90 NSaved=  10.
 NSaved=10 IEnMin= 1 EnMin= -732.295983974770     IErMin=10 ErrMin= 2.08D-05
 ErrMax= 2.08D-05  0.00D+00 EMaxC= 1.00D-01 BMatC= 1.33D-07 BMatP= 4.08D-08
 IDIUse=1 WtCom= 1.00D+00 WtEn= 0.00D+00
 Large coefficients: NSaved= 10 BigCof=   35.94 CofMax=   10.00 Det=-7.99D-13
 Inversion failed.  Reducing to  9 matrices.
 Large coefficients: NSaved=  9 BigCof=   35.25 CofMax=   10.00 Det=-8.00D-13
 Inversion failed.  Reducing to  8 matrices.
 Coeff-Com:  0.422D+00 0.108D+01-0.134D+01-0.207D+01 0.412D+01-0.592D+01
 Coeff-Com:  0.574D+01-0.103D+01
 Coeff:      0.422D+00 0.108D+01-0.134D+01-0.207D+01 0.412D+01-0.592D+01
 Coeff:      0.574D+01-0.103D+01
 Gap=     0.147 Goal=   None    Shift=    0.000
 Gap=     0.266 Goal=   None    Shift=    0.000
 RMSDP=3.61D-04 MaxDP=2.56D-02 DE= 1.08D-05 OVMax= 3.61D-02

 Cycle  91  Pass 1  IDiag  1:
 RMSU=  1.02D-05    CP:  1.00D+00 -3.00D+00  3.00D+00  4.94D-01 -3.00D+00
                    CP:  3.00D+00 -3.00D+00 -3.00D+00 -2.41D+00 -9.79D-04
 E= -732.295978697741     Delta-E=       -0.000011724252 Rises=F Damp=F
 DIIS: error= 2.07D-05 at cycle  91 NSaved=   9.
 NSaved= 9 IEnMin= 1 EnMin= -732.295983974770     IErMin= 9 ErrMin= 2.07D-05
 ErrMax= 2.07D-05  0.00D+00 EMaxC= 1.00D-01 BMatC= 1.13D-07 BMatP= 4.09D-08
 IDIUse=1 WtCom= 1.00D+00 WtEn= 0.00D+00
 Large coefficients: NSaved=  9 BigCof=   24.93 CofMax=   10.00 Det=-6.85D-12
 Inversion failed.  Reducing to  8 matrices.
 Coeff-Com:  0.278D+00 0.373D+00-0.558D+00 0.724D+00 0.366D+00 0.328D+00
 Coeff-Com: -0.108D+01 0.571D+00
 Coeff:      0.278D+00 0.373D+00-0.558D+00 0.724D+00 0.366D+00 0.328D+00
 Coeff:     -0.108D+01 0.571D+00
 Gap=     0.147 Goal=   None    Shift=    0.000
 Gap=     0.266 Goal=   None    Shift=    0.000
 RMSDP=5.59D-04 MaxDP=3.69D-02 DE=-1.17D-05 OVMax= 5.47D-02

 Cycle  92  Pass 1  IDiag  1:
 RMSU=  4.24D-05    CP:  1.00D+00  3.00D+00 -3.00D+00 -3.00D+00 -3.00D+00
                    CP:  3.00D+00 -3.00D+00 -3.00D+00 -3.00D+00 -1.02D+00
                    CP:  1.32D+00
 E= -732.295996865559     Delta-E=       -0.000018167818 Rises=F Damp=F
 DIIS: error= 4.54D-05 at cycle  92 NSaved=   9.
 NSaved= 9 IEnMin= 9 EnMin= -732.295996865559     IErMin= 8 ErrMin= 2.07D-05
 ErrMax= 4.54D-05  0.00D+00 EMaxC= 1.00D-01 BMatC= 7.55D-07 BMatP= 4.09D-08
 IDIUse=1 WtCom= 1.00D+00 WtEn= 0.00D+00
 Coeff-Com:  0.531D-01 0.146D+00-0.452D+00 0.594D+00 0.552D+00 0.510D+00
 Coeff-Com: -0.102D+01 0.435D+00 0.177D+00
 Coeff:      0.531D-01 0.146D+00-0.452D+00 0.594D+00 0.552D+00 0.510D+00
 Coeff:     -0.102D+01 0.435D+00 0.177D+00
 Gap=     0.147 Goal=   None    Shift=    0.000
 Gap=     0.266 Goal=   None    Shift=    0.000
 RMSDP=2.63D-05 MaxDP=1.88D-03 DE=-1.82D-05 OVMax= 2.91D-03

 Cycle  93  Pass 1  IDiag  1:
 RMSU=  1.00D-05    CP:  1.00D+00  3.00D+00 -3.00D+00 -3.00D+00 -3.00D+00
                    CP:  3.00D+00 -3.00D+00 -3.00D+00 -3.00D+00 -1.15D+00
                    CP:  8.68D-01  9.89D-01
 E= -732.295997812814     Delta-E=       -0.000000947254 Rises=F Damp=F
 DIIS: error= 4.23D-05 at cycle  93 NSaved=  10.
 NSaved=10 IEnMin=10 EnMin= -732.295997812814     IErMin= 8 ErrMin= 2.07D-05
 ErrMax= 4.23D-05  0.00D+00 EMaxC= 1.00D-01 BMatC= 6.77D-07 BMatP= 4.09D-08
 IDIUse=1 WtCom= 1.00D+00 WtEn= 0.00D+00
 Coeff-Com:  0.401D-01 0.518D+00-0.722D+00 0.711D-01 0.157D+01-0.868D-01
 Coeff-Com: -0.118D+01 0.703D+00 0.120D+01-0.111D+01
 Coeff:      0.401D-01 0.518D+00-0.722D+00 0.711D-01 0.157D+01-0.868D-01
 Coeff:     -0.118D+01 0.703D+00 0.120D+01-0.111D+01
 Gap=     0.147 Goal=   None    Shift=    0.000
 Gap=     0.266 Goal=   None    Shift=    0.000
 RMSDP=1.54D-05 MaxDP=1.98D-03 DE=-9.47D-07 OVMax= 1.43D-03

 Cycle  94  Pass 1  IDiag  1:
 RMSU=  2.71D-07    CP:  1.00D+00  3.00D+00 -3.00D+00 -3.00D+00 -3.00D+00
                    CP:  3.00D+00 -3.00D+00 -3.00D+00 -3.00D+00 -1.12D+00
                    CP:  1.51D+00  1.09D+00 -1.39D-01
 E= -732.295997379000     Delta-E=        0.000000433813 Rises=F Damp=F
 DIIS: error= 4.97D-05 at cycle  94 NSaved=  11.
 NSaved=11 IEnMin=10 EnMin= -732.295997812814     IErMin= 8 ErrMin= 2.07D-05
 ErrMax= 4.97D-05  0.00D+00 EMaxC= 1.00D-01 BMatC= 9.10D-07 BMatP= 4.09D-08
 IDIUse=1 WtCom= 1.00D+00 WtEn= 0.00D+00
 Coeff-Com: -0.169D+00 0.846D+00-0.111D+01 0.185D+01-0.200D+01 0.229D+01
 Coeff-Com: -0.839D+00 0.378D+00-0.541D-01-0.339D+01 0.319D+01
 Coeff:     -0.169D+00 0.846D+00-0.111D+01 0.185D+01-0.200D+01 0.229D+01
 Coeff:     -0.839D+00 0.378D+00-0.541D-01-0.339D+01 0.319D+01
 Gap=     0.147 Goal=   None    Shift=    0.000
 Gap=     0.266 Goal=   None    Shift=    0.000
 RMSDP=2.75D-04 MaxDP=1.77D-02 DE= 4.34D-07 OVMax= 2.83D-02

 Cycle  95  Pass 1  IDiag  1:
 RMSU=  1.05D-06    CP:  1.00D+00 -2.00D+00 -3.00D+00 -1.94D+00 -3.00D+00
                    CP:  3.00D+00 -3.00D+00 -3.00D+00 -3.00D+00 -1.39D-02
                    CP:  1.98D+00  3.65D-01 -1.55D+00  3.00D+00
 E= -732.295988211606     Delta-E=        0.000009167394 Rises=F Damp=F
 DIIS: error= 2.85D-05 at cycle  95 NSaved=  12.
 NSaved=12 IEnMin=10 EnMin= -732.295997812814     IErMin= 8 ErrMin= 2.07D-05
 ErrMax= 2.85D-05  0.00D+00 EMaxC= 1.00D-01 BMatC= 3.74D-07 BMatP= 4.09D-08
 IDIUse=1 WtCom= 1.00D+00 WtEn= 0.00D+00
 Coeff-Com: -0.791D+00 0.179D+01-0.313D+01 0.168D+01-0.140D+01 0.374D+01
 Coeff-Com: -0.123D+01 0.141D+00-0.339D+00-0.838D+01 0.724D+01 0.168D+01
 Coeff:     -0.791D+00 0.179D+01-0.313D+01 0.168D+01-0.140D+01 0.374D+01
 Coeff:     -0.123D+01 0.141D+00-0.339D+00-0.838D+01 0.724D+01 0.168D+01
 Gap=     0.147 Goal=   None    Shift=    0.000
 Gap=     0.266 Goal=   None    Shift=    0.000
 RMSDP=1.80D-04 MaxDP=1.28D-02 DE= 9.17D-06 OVMax= 1.98D-02

 Cycle  96  Pass 1  IDiag  1:
 RMSU=  2.95D-05    CP:  1.00D+00 -3.00D+00 -2.49D+00  2.67D-01 -3.00D+00
                    CP:  3.00D+00 -3.00D+00 -3.00D+00 -3.00D+00 -4.60D-02
                    CP:  3.00D+00  6.49D-01 -3.00D+00  3.00D+00  3.00D+00
 E= -732.295981665837     Delta-E=        0.000006545770 Rises=F Damp=F
 DIIS: error= 5.42D-05 at cycle  96 NSaved=  13.
 NSaved=13 IEnMin=10 EnMin= -732.295997812814     IErMin= 8 ErrMin= 2.07D-05
 ErrMax= 5.42D-05  0.00D+00 EMaxC= 1.00D-01 BMatC= 1.40D-06 BMatP= 4.09D-08
 IDIUse=1 WtCom= 1.00D+00 WtEn= 0.00D+00
 Coeff-Com: -0.765D+00 0.182D+01-0.341D+01 0.269D+01-0.316D+01 0.436D+01
 Coeff-Com: -0.117D+01 0.328D+00-0.121D+01-0.831D+01 0.781D+01 0.225D+01
 Coeff-Com: -0.238D+00
 Coeff:     -0.765D+00 0.182D+01-0.341D+01 0.269D+01-0.316D+01 0.436D+01
 Coeff:     -0.117D+01 0.328D+00-0.121D+01-0.831D+01 0.781D+01 0.225D+01
 Coeff:     -0.238D+00
 Gap=     0.147 Goal=   None    Shift=    0.000
 Gap=     0.266 Goal=   None    Shift=    0.000
 RMSDP=2.88D-06 MaxDP=1.82D-04 DE= 6.55D-06 OVMax= 2.91D-04

 Cycle  97  Pass 1  IDiag  1:
 RMSU=  4.05D-07    CP:  1.00D+00 -3.00D+00 -2.35D+00  2.69D-01 -3.00D+00
                    CP:  3.00D+00 -3.00D+00 -3.00D+00 -3.00D+00 -4.64D-02
                    CP:  3.00D+00  6.59D-01 -3.00D+00  3.00D+00  3.00D+00
                    CP:  1.02D+00
 E= -732.295981572350     Delta-E=        0.000000093486 Rises=F Damp=F
 DIIS: error= 5.38D-05 at cycle  97 NSaved=  14.
 NSaved=14 IEnMin=10 EnMin= -732.295997812814     IErMin= 8 ErrMin= 2.07D-05
 ErrMax= 5.38D-05  0.00D+00 EMaxC= 1.00D-01 BMatC= 1.39D-06 BMatP= 4.09D-08
 IDIUse=1 WtCom= 1.00D+00 WtEn= 0.00D+00
 Coeff-Com: -0.763D+00 0.173D+01-0.378D+01 0.220D+01-0.901D+00 0.159D+01
 Coeff-Com: -0.125D+01 0.152D+01-0.168D+01-0.887D+01 0.839D+01 0.378D+01
 Coeff-Com: -0.611D+01 0.514D+01
 Coeff:     -0.763D+00 0.173D+01-0.378D+01 0.220D+01-0.901D+00 0.159D+01
 Coeff:     -0.125D+01 0.152D+01-0.168D+01-0.887D+01 0.839D+01 0.378D+01
 Coeff:     -0.611D+01 0.514D+01
 Gap=     0.147 Goal=   None    Shift=    0.000
 Gap=     0.266 Goal=   None    Shift=    0.000
 RMSDP=1.93D-05 MaxDP=1.33D-03 DE= 9.35D-08 OVMax= 1.70D-03

 Cycle  98  Pass 1  IDiag  1:
 RMSU=  1.83D-06    CP:  1.00D+00 -3.00D+00 -3.00D+00  2.21D-01 -3.00D+00
                    CP:  3.00D+00 -3.00D+00 -3.00D+00 -3.00D+00 -5.05D-02
                    CP:  3.00D+00  7.39D-01 -3.00D+00  3.00D+00  3.00D+00
                    CP:  1.25D+00  6.67D-01
 E= -732.295981970433     Delta-E=       -0.000000398083 Rises=F Damp=F
 DIIS: error= 5.87D-05 at cycle  98 NSaved=  15.
 NSaved=15 IEnMin=10 EnMin= -732.295997812814     IErMin= 8 ErrMin= 2.07D-05
 ErrMax= 5.87D-05  0.00D+00 EMaxC= 1.00D-01 BMatC= 1.65D-06 BMatP= 4.09D-08
 IDIUse=1 WtCom= 1.00D+00 WtEn= 0.00D+00
 Coeff-Com: -0.763D+00 0.172D+01-0.377D+01 0.221D+01-0.880D+00 0.156D+01
 Coeff-Com: -0.126D+01 0.152D+01-0.168D+01-0.887D+01 0.839D+01 0.378D+01
 Coeff-Com: -0.615D+01 0.520D+01-0.178D-01
 Coeff:     -0.763D+00 0.172D+01-0.377D+01 0.221D+01-0.880D+00 0.156D+01
 Coeff:     -0.126D+01 0.152D+01-0.168D+01-0.887D+01 0.839D+01 0.378D+01
 Coeff:     -0.615D+01 0.520D+01-0.178D-01
 Gap=     0.147 Goal=   None    Shift=    0.000
 Gap=     0.266 Goal=   None    Shift=    0.000
 RMSDP=5.12D-07 MaxDP=3.36D-05 DE=-3.98D-07 OVMax= 4.64D-05

 Error on total polarization charges =  0.04292
 SCF Done:  E(UM062X) =  -732.295981970     A.U. after   98 cycles
            NFock= 98  Conv=0.51D-06     -V/T= 2.0641
 <Sx>= 0.0000 <Sy>= 0.0000 <Sz>= 1.5000 <S**2>= 4.7676 S= 1.7400
 <L.S>=  0.00000000000    
 KE= 6.882057761274D+02 PE=-3.319071926835D+03 EE= 1.069904306154D+03
 SMD-CDS (non-electrostatic) energy       (kcal/mol) =       6.43
 (included in total energy above)
 Annihilation of the first spin contaminant:
 S**2 before annihilation     4.7676,   after     3.7769
 Leave Link  502 at Wed May 24 01:24:06 2023, MaxMem=  2684354560 cpu:            4586.3 elap:             460.1
 (Enter /home/xut/apps/g16/l701.exe)
 ... and contract with generalized density number  0.
 Compute integral first derivatives.
   1 Symmetry operations used in ECPInt.
 ECPInt:  NShTT=    6105 NPrTT=   23469 LenC2=    5790 LenP2D=   15730.
 LDataN:  DoStor=T MaxTD1= 5 Len=  102
 D1PCM: PCM CHGder 1st derivatives, ID1Alg=3 FixD1E=F DoIter=F DoCFld=F I1PDM=0.
 GePol: Maximum number of non-zero 1st derivatives   =     187
 Leave Link  701 at Wed May 24 01:24:07 2023, MaxMem=  2684354560 cpu:              10.2 elap:               1.0
 (Enter /home/xut/apps/g16/l702.exe)
 L702 exits ... SP integral derivatives will be done elsewhere.
 Leave Link  702 at Wed May 24 01:24:07 2023, MaxMem=  2684354560 cpu:               0.1 elap:               0.0
 (Enter /home/xut/apps/g16/l703.exe)
 Integral derivatives from FoFJK, PRISM(SPDF).
 Compute integral first derivatives, UseDBF=F ICtDFT=           0.
 Calling FoFJK, ICntrl=      2127 FMM=F ISym2X=0 I1Cent= 0 IOpClX= 1 NMat=1 NMatS=1 NMatT=0.
 FoFJK:  IHMeth= 1 ICntrl=    2127 DoSepK=F KAlg= 0 I1Cent=           0 FoldK=F
 IRaf=         0 NMat=       1 IRICut=       1 DoRegI=T DoRafI=F ISym2E= 0 IDoP0=0 IntGTp=1.
 FoFCou: FMM=F IPFlag=           0 FMFlag=      100000 FMFlg1=         800
         NFxFlg=           0 DoJE=F BraDBF=F KetDBF=F FulRan=T
         wScrn=  0.000000 ICntrl=      2127 IOpCl=  1 I1Cent=           0 NGrid=           0
         NMat0=    1 NMatS0=      1 NMatT0=    0 NMatD0=    1 NMtDS0=    0 NMtDT0=    0
 Symmetry not used in FoFCou.
 Leave Link  703 at Wed May 24 01:24:18 2023, MaxMem=  2684354560 cpu:             104.7 elap:              10.5
 (Enter /home/xut/apps/g16/l716.exe)
 Dipole        = 8.88594147D+00-3.42229809D+00-2.48505185D-01
 ***** Axes restored to original set *****
 -------------------------------------------------------------------
 Center     Atomic                   Forces (Hartrees/Bohr)
 Number     Number              X              Y              Z
 -------------------------------------------------------------------
      1        6           0.004705819   -0.011984676    0.000166310
      2        6          -0.003610754   -0.000750578    0.000390925
      3        6          -0.004332413    0.006434535   -0.000784973
      4        6           0.008733500   -0.006586459   -0.000584716
      5        6          -0.005418234    0.020008613   -0.001057671
      6        6          -0.022144054    0.000972655    0.000680942
      7        1           0.001017816    0.000850583   -0.000064271
      8        1           0.000877676   -0.000605713    0.000242201
      9        6           0.008368599    0.006538374    0.006127511
     10        8          -0.004468171   -0.004385382   -0.001952649
     11        1          -0.000637531    0.000896692   -0.000156847
     12        8          -0.006075343    0.005054674    0.000028193
     13        8           0.003952135   -0.015578673    0.000644856
     14        1          -0.000967207    0.001703277   -0.000099878
     15        8           0.016501231   -0.001513401   -0.000515702
     16        1          -0.003349218   -0.000223326    0.000343736
     17        8           0.002738482    0.007885879   -0.000349773
     18        1          -0.000592965   -0.000685656    0.000322030
     19       24           0.004700632   -0.008031416   -0.003380223
 -------------------------------------------------------------------
 Cartesian Forces:  Max     0.022144054 RMS     0.006297448
 Leave Link  716 at Wed May 24 01:24:18 2023, MaxMem=  2684354560 cpu:               0.2 elap:               0.0
 (Enter /home/xut/apps/g16/l103.exe)

 GradGradGradGradGradGradGradGradGradGradGradGradGradGradGradGradGradGrad
 Berny optimization.
 Using GEDIIS/GDIIS optimizer.
 FormGI is forming the generalized inverse of G from B-inverse, IUseBI=4.
 Internal  Forces:  Max     0.013625203 RMS     0.003365257
 Search for a local minimum.
 Step number   2 out of a maximum of   92
 All quantities printed in internal units (Hartrees-Bohrs-Radians)
 RMS Force = .33653D-02 SwitMx=.10000D-02 MixMth= 1
 Mixed Optimization -- RFO/linear search
 Update second derivatives using D2CorX and points    1    2
 DE= -1.43D-02 DEPred=-1.26D-02 R= 1.13D+00
 TightC=F SS=  1.41D+00  RLast= 3.03D-01 DXNew= 5.0454D-01 9.0864D-01
 Trust test= 1.13D+00 RLast= 3.03D-01 DXMaxT set to 5.05D-01
 ITU=  1  0
 Use linear search instead of GDIIS.
     Eigenvalues ---    0.00932   0.01315   0.01402   0.01506   0.01803
     Eigenvalues ---    0.02155   0.02158   0.02159   0.02165   0.02189
     Eigenvalues ---    0.02192   0.02208   0.02211   0.02223   0.02226
     Eigenvalues ---    0.02241   0.02459   0.11024   0.15791   0.15995
     Eigenvalues ---    0.15999   0.16000   0.16000   0.16176   0.23388
     Eigenvalues ---    0.23479   0.24016   0.24993   0.24999   0.25000
     Eigenvalues ---    0.25000   0.25000   0.25711   0.33696   0.35514
     Eigenvalues ---    0.35573   0.39228   0.43355   0.44507   0.46462
     Eigenvalues ---    0.47551   0.48620   0.49746   0.51988   0.52975
     Eigenvalues ---    0.53843   0.53934   0.53990   0.54230   0.56556
     Eigenvalues ---    0.99550
 RFO step:  Lambda=-7.60636345D-03 EMin= 9.32235113D-03
 Quartic linear search produced a step of  0.27114.
 Iteration  1 RMS(Cart)=  0.13761183 RMS(Int)=  0.02647479
 Iteration  2 RMS(Cart)=  0.10314033 RMS(Int)=  0.01036487
 Iteration  3 RMS(Cart)=  0.01079593 RMS(Int)=  0.00103550
 Iteration  4 RMS(Cart)=  0.00006999 RMS(Int)=  0.00103520
 Iteration  5 RMS(Cart)=  0.00000001 RMS(Int)=  0.00103520
 ITry= 1 IFail=0 DXMaxC= 1.48D+00 DCOld= 1.00D+10 DXMaxT= 5.05D-01 DXLimC= 3.00D+00 Rises=F
 Variable       Old X    -DE/DX   Delta X   Delta X   Delta X     New X
                                 (Linear)    (Quad)   (Total)
    R1        2.58372  -0.00178  -0.00888  -0.00791  -0.01677   2.56695
    R2        2.69162   0.00533   0.01462   0.01990   0.03447   2.72609
    R3        2.53853  -0.00708  -0.01106  -0.02085  -0.03191   2.50661
    R4        2.67681   0.00169   0.01038   0.00688   0.01732   2.69413
    R5        2.04681  -0.00023  -0.00019  -0.00088  -0.00107   2.04574
    R6        2.62877  -0.00612  -0.00207  -0.01797  -0.01999   2.60878
    R7        2.82629   0.00185   0.00445   0.00816   0.01262   2.83890
    R8        2.61160   0.00638  -0.00274   0.01629   0.01352   2.62512
    R9        2.04579  -0.00014  -0.00073  -0.00070  -0.00142   2.04437
   R10        2.71364   0.00551   0.02177   0.02297   0.04468   2.75832
   R11        2.51191  -0.01363  -0.01816  -0.03907  -0.05723   2.45468
   R12        2.47310  -0.01324  -0.02610  -0.04021  -0.06631   2.40679
   R13        2.50676  -0.00607  -0.00801  -0.01623  -0.02423   2.48252
   R14        2.28613   0.00272  -0.00073   0.00320   0.00247   2.28860
   R15        1.83061   0.00103   0.00072   0.00266   0.00338   1.83400
   R16        4.07887   0.00973   0.05116   0.10109   0.15225   4.23112
   R17        1.83758   0.00077   0.00266   0.00269   0.00535   1.84293
   R18        1.84590   0.00161   0.00459   0.00532   0.00991   1.85581
   R19        1.83142   0.00029   0.00163   0.00122   0.00285   1.83428
    A1        2.07599  -0.00009  -0.00698  -0.00173  -0.00872   2.06727
    A2        2.20219   0.00390   0.00914   0.02144   0.03059   2.23278
    A3        2.00500  -0.00381  -0.00216  -0.01972  -0.02187   1.98313
    A4        2.08629   0.00107   0.00098   0.00309   0.00416   2.09045
    A5        2.08678   0.00085  -0.00114   0.00888   0.00769   2.09447
    A6        2.11003  -0.00192   0.00015  -0.01203  -0.01193   2.09810
    A7        2.14528   0.00192   0.01018   0.00871   0.01892   2.16420
    A8        2.02328  -0.00128  -0.00566  -0.00630  -0.01206   2.01122
    A9        2.11437  -0.00065  -0.00452  -0.00286  -0.00750   2.10687
   A10        2.06391   0.00025  -0.00514  -0.00056  -0.00572   2.05819
   A11        2.16194  -0.00117   0.00487  -0.00752  -0.00269   2.15925
   A12        2.05697   0.00092   0.00032   0.00765   0.00793   2.06489
   A13        2.09148  -0.00124  -0.00250  -0.00412  -0.00671   2.08477
   A14        2.08621   0.00424   0.00130   0.02003   0.02139   2.10760
   A15        2.10548  -0.00300   0.00120  -0.01592  -0.01468   2.09081
   A16        2.10318  -0.00190   0.00341  -0.00534  -0.00205   2.10113
   A17        2.13364   0.00234  -0.00067   0.00982   0.00920   2.14284
   A18        2.04636  -0.00043  -0.00273  -0.00448  -0.00715   2.03921
   A19        2.08897  -0.00060   0.00627  -0.00036   0.00098   2.08996
   A20        2.11967  -0.00450  -0.00830  -0.02353  -0.03659   2.08308
   A21        2.07437   0.00516   0.00198   0.02717   0.02398   2.09835
   A22        1.98608  -0.00016   0.00559  -0.00028   0.00531   1.99139
   A23        1.93946   0.00328   0.00718   0.02629   0.03347   1.97293
   A24        1.92760   0.00544   0.00304   0.04204   0.04508   1.97268
   A25        1.93354   0.00157   0.00259   0.01244   0.01503   1.94857
   A26        3.21735  -0.00142   0.01633  -0.11166  -0.09533   3.12202
   A27        3.24137  -0.00540   0.03155  -0.37894  -0.34739   2.89398
    D1        0.00987   0.00028   0.00011   0.01301   0.01313   0.02300
    D2        3.13765   0.00015  -0.00062   0.00842   0.00773  -3.13781
    D3       -3.13478   0.00028   0.00006   0.01264   0.01273  -3.12205
    D4       -0.00700   0.00015  -0.00066   0.00804   0.00732   0.00032
    D5        0.00586  -0.00022   0.00126  -0.01013  -0.00883  -0.00297
    D6       -3.13995  -0.00020   0.00153  -0.01009  -0.00855   3.13468
    D7       -3.13301  -0.00023   0.00129  -0.00986  -0.00857  -3.14158
    D8        0.00436  -0.00021   0.00155  -0.00982  -0.00829  -0.00393
    D9       -0.03511   0.00026  -0.00040   0.01214   0.01174  -0.02338
   D10        3.10353   0.00027  -0.00045   0.01180   0.01136   3.11489
   D11       -0.02363  -0.00008  -0.00222  -0.00171  -0.00406  -0.02769
   D12       -3.14121   0.00035  -0.00245   0.01973   0.01723  -3.12398
   D13        3.13196   0.00002  -0.00147   0.00277   0.00120   3.13316
   D14        0.01439   0.00046  -0.00170   0.02421   0.02249   0.03687
   D15        0.02008  -0.00028   0.00256  -0.01326  -0.01074   0.00935
   D16       -3.09160   0.00008   0.00080   0.00376   0.00451  -3.08709
   D17        3.13644  -0.00074   0.00281  -0.03583  -0.03317   3.10327
   D18        0.02476  -0.00039   0.00105  -0.01881  -0.01793   0.00683
   D19       -2.76729  -0.00039   0.00607  -0.00676   0.00074  -2.76655
   D20        0.35411   0.00280   0.00039   0.18577   0.18499   0.53909
   D21        0.39786   0.00000   0.00561   0.01410   0.02088   0.41874
   D22       -2.76393   0.00319  -0.00007   0.20663   0.20512  -2.55881
   D23       -0.00355   0.00037  -0.00103   0.01603   0.01494   0.01139
   D24       -3.14045   0.00040  -0.00205   0.01802   0.01597  -3.12448
   D25        3.10995   0.00000   0.00073  -0.00022   0.00037   3.11032
   D26       -0.02695   0.00003  -0.00030   0.00178   0.00140  -0.02555
   D27       -0.00921  -0.00012  -0.00084  -0.00479  -0.00563  -0.01484
   D28        3.13640  -0.00015  -0.00109  -0.00485  -0.00594   3.13047
   D29        3.12764  -0.00013   0.00020  -0.00671  -0.00655   3.12108
   D30       -0.00993  -0.00016  -0.00006  -0.00678  -0.00686  -0.01679
   D31       -3.13584  -0.00015   0.00070  -0.00730  -0.00662   3.14072
   D32        0.01048  -0.00013  -0.00031  -0.00532  -0.00561   0.00487
   D33       -0.00241   0.00014   0.00137   0.00509   0.00647   0.00406
   D34        3.13509   0.00016   0.00164   0.00512   0.00676  -3.14134
   D35        0.13179   0.00102  -0.00113   0.07310   0.07384   0.20563
   D36       -2.99014  -0.00198   0.00440  -0.11385  -0.11133  -3.10146
         Item               Value     Threshold  Converged?
 Maximum Force            0.013625     0.000450     NO 
 RMS     Force            0.003365     0.000300     NO 
 Maximum Displacement     1.483681     0.001800     NO 
 RMS     Displacement     0.236692     0.001200     NO 
 Predicted change in Energy=-5.526460D-03
 Lowest energy point so far.  Saving SCF results.
 GradGradGradGradGradGradGradGradGradGradGradGradGradGradGradGradGradGrad

 Leave Link  103 at Wed May 24 01:24:18 2023, MaxMem=  2684354560 cpu:               0.2 elap:               0.0
 (Enter /home/xut/apps/g16/l202.exe)
                          Input orientation:                          
 ---------------------------------------------------------------------
 Center     Atomic      Atomic             Coordinates (Angstroms)
 Number     Number       Type             X           Y           Z
 ---------------------------------------------------------------------
      1          6           0       -1.265929   -0.868911    0.295202
      2          6           0        0.091302   -0.845029    0.345551
      3          6           0        0.780756    0.400546    0.269801
      4          6           0        0.154870    1.621064    0.113591
      5          6           0       -1.232058    1.635813    0.036360
      6          6           0       -1.969734    0.380257    0.136163
      7          1           0        0.645074   -1.768059    0.460811
      8          1           0        0.684590    2.558398    0.007928
      9          6           0        2.279521    0.306523    0.311257
     10          8           0        2.988565    1.352746    0.669680
     11          1           0        2.465251    2.071928    1.058021
     12          8           0        2.825848   -0.672056   -0.147669
     13          8           0       -1.876296    2.751483   -0.129593
     14          1           0       -2.843337    2.631612   -0.168962
     15          8           0       -3.239649    0.452776    0.071607
     16          1           0       -3.678611   -0.422657    0.144797
     17          8           0       -2.066226   -1.923968    0.371556
     18          1           0       -1.562962   -2.749859    0.454045
     19         24           0        3.578517   -2.324913   -1.457143
 ---------------------------------------------------------------------
                    Distance matrix (angstroms):
                    1          2          3          4          5
     1  C    0.000000
     2  C    1.358374   0.000000
     3  C    2.408544   1.425672   0.000000
     4  C    2.872564   2.477793   1.380507   0.000000
     5  C    2.518290   2.828685   2.373142   1.389155   0.000000
     6  C    1.442586   2.406873   2.753809   2.460499   1.459640
     7  H    2.118449   1.082559   2.181225   3.441950   3.910260
     8  H    3.953922   3.471210   2.175811   1.081834   2.127326
     9  C    3.735253   2.472964   1.502283   2.506239   3.764807
    10  O    4.814219   3.650946   2.437418   2.900182   4.277251
    11  H    4.811666   3.827778   2.500466   2.536353   3.860581
    12  O    4.120379   2.784049   2.346733   3.529982   4.671908
    13  O    3.695977   4.126997   3.570203   2.337225   1.298962
    14  H    3.867469   4.578630   4.278343   3.176521   1.905253
    15  O    2.385879   3.585328   4.025626   3.590183   2.330502
    16  H    2.458210   3.798808   4.536435   4.344346   3.199168
    17  O    1.326443   2.412408   3.676822   4.191308   3.671544
    18  H    1.910871   2.525220   3.930904   4.708696   4.417927
    19  Cr   5.353439   4.195287   4.270588   5.455208   6.407771
                    6          7          8          9         10
     6  C    0.000000
     7  H    3.399688   0.000000
     8  H    3.436013   4.350276   0.000000
     9  C    4.253500   2.645312   2.776105   0.000000
    10  O    5.080856   3.908325   2.683246   1.313695   0.000000
    11  H    4.835356   4.291294   2.123700   1.925826   0.970509
    12  O    4.917878   2.515402   3.878792   1.211074   2.189603
    13  O    2.387901   5.208853   2.571835   4.841797   5.124663
    14  H    2.434108   5.650020   3.533117   5.646266   6.029087
    15  O    1.273621   4.491621   4.453914   5.526306   6.321256
    16  H    1.888122   4.539187   5.286109   6.004894   6.919450
    17  O    2.318226   2.717245   5.271701   4.885104   6.031305
    18  H    3.172402   2.416484   5.781705   4.911876   6.131416
    19  Cr   6.374924   3.548763   5.862420   3.426234   4.289126
                   11         12         13         14         15
    11  H    0.000000
    12  O    3.018801   0.000000
    13  O    4.552060   5.816451   0.000000
    14  H    5.477210   6.561579   0.975236   0.000000
    15  O    6.011701   6.172809   2.680161   2.227614   0.000000
    16  H    6.693577   6.515805   3.660436   3.181932   0.982053
    17  O    6.080518   5.076344   4.706067   4.652889   2.667547
    18  H    6.311966   4.892952   5.541081   5.566662   3.635163
    19  Cr   5.186291   2.239011   7.568829   8.213814   7.519309
                   16         17         18         19
    16  H    0.000000
    17  O    2.214755   0.000000
    18  H    3.160297   0.970657   0.000000
    19  Cr   7.671421   5.947101   5.501638   0.000000
 Stoichiometry    C7H6CrO5(3+,4)
 Framework group  C1[X(C7H6CrO5)]
 Deg. of freedom    51
 Full point group                 C1      NOp   1
 RotChk:  IX=0 Diff= 1.59D-01
 Largest Abelian subgroup         C1      NOp   1
 Largest concise Abelian subgroup C1      NOp   1
                         Standard orientation:                         
 ---------------------------------------------------------------------
 Center     Atomic      Atomic             Coordinates (Angstroms)
 Number     Number       Type             X           Y           Z
 ---------------------------------------------------------------------
      1          6           0       -1.458017   -1.320493    0.387602
      2          6           0       -0.256783   -0.712884    0.569338
      3          6           0       -0.123942    0.683492    0.314333
      4          6           0       -1.148902    1.484857   -0.147262
      5          6           0       -2.387591    0.895312   -0.365981
      6          6           0       -2.564005   -0.527183   -0.090417
      7          1           0        0.591151   -1.285002    0.923770
      8          1           0       -1.030564    2.533485   -0.385463
      9          6           0        1.253397    1.244917    0.525507
     10          8           0        1.407246    2.532537    0.735649
     11          1           0        0.579638    3.006269    0.916008
     12          8           0        2.218301    0.539347    0.330996
     13          8           0       -3.385225    1.593806   -0.817794
     14          1           0       -4.199201    1.068498   -0.929955
     15          8           0       -3.722970   -1.013400   -0.296577
     16          1           0       -3.778869   -1.972556   -0.093294
     17          8           0       -1.767074   -2.593881    0.593566
     18          1           0       -0.997749   -3.105371    0.891378
     19         24           0        3.789518   -0.800029   -0.535328
 ---------------------------------------------------------------------
 Rotational constants (GHZ):           1.0396221           0.3137192           0.2552402
 Leave Link  202 at Wed May 24 01:24:18 2023, MaxMem=  2684354560 cpu:               0.1 elap:               0.0
 (Enter /home/xut/apps/g16/l301.exe)
 Basis read from rwf:  (5D, 7F)
 Pseudo-potential data read from rwf file.
 There are   342 symmetry adapted cartesian basis functions of A   symmetry.
 There are   328 symmetry adapted basis functions of A   symmetry.
   328 basis functions,   538 primitive gaussians,   342 cartesian basis functions
    51 alpha electrons       48 beta electrons
       nuclear repulsion energy       832.1293812123 Hartrees.
 IExCor= 4336 DFT=T Ex+Corr=M062X ExCW=0 ScaHFX=  0.540000
 ScaDFX=  1.000000  1.000000  1.000000  1.000000 ScalE2=  1.000000  1.000000
 IRadAn=      5 IRanWt=     -1 IRanGd=            0 ICorTp=0 IEmpDi=  4
 NAtoms=   19 NActive=   19 NUniq=   19 SFac= 1.00D+00 NAtFMM=   60 NAOKFM=F Big=F
 Integral buffers will be    131072 words long.
 Raffenetti 2 integral format.
 Two-electron integral symmetry is turned on.
 No density basis found on file   724.
 ------------------------------------------------------------------------------
 Polarizable Continuum Model (PCM)
 =================================
 Model                : PCM.
 Atomic radii         : SMD-Coulomb.
 Polarization charges : Total charges.
 Charge compensation  : None.
 Solution method      : On-the-fly selection.
 Cavity type          : VdW (van der Waals Surface) (Alpha=1.000).
 Cavity algorithm     : GePol (No added spheres)
                        Default sphere list used, NSphG=   19.
                        Lebedev-Laikov grids with approx.  5.0 points / Ang**2.
                        Smoothing algorithm: York/Karplus (Gamma=1.0000).
                        Polarization charges: spherical gaussians, with
                                              point-specific exponents (IZeta= 3).
                        Self-potential: point-specific (ISelfS= 7).
                        Self-field    : sphere-specific E.n sum rule (ISelfD= 2).
 1st derivatives      : Analytical E(r).r(x)/FMM algorithm (CHGder, D1EAlg=3).
                        Cavity 1st derivative terms included.
 Solvent              : Water, Eps=  78.355300 Eps(inf)=   1.777849
 ------------------------------------------------------------------------------
 Spheres list:
 ISph  on   Nord     Re0    Alpha      Xe            Ye            Ze
    1   C      1    1.8500  1.000     -1.458017     -1.320493      0.387602
    2   C      2    1.8500  1.000     -0.256783     -0.712884      0.569338
    3   C      3    1.8500  1.000     -0.123942      0.683492      0.314333
    4   C      4    1.8500  1.000     -1.148902      1.484857     -0.147262
    5   C      5    1.8500  1.000     -2.387591      0.895312     -0.365981
    6   C      6    1.8500  1.000     -2.564005     -0.527183     -0.090417
    7   H      7    1.2000  1.000      0.591151     -1.285002      0.923770
    8   H      8    1.2000  1.000     -1.030564      2.533485     -0.385463
    9   C      9    1.8500  1.000      1.253397      1.244917      0.525507
   10   O     10    1.5200  1.000      1.407246      2.532537      0.735649
   11   H     11    1.2000  1.000      0.579638      3.006269      0.916008
   12   O     12    1.5200  1.000      2.218301      0.539347      0.330996
   13   O     13    1.5200  1.000     -3.385225      1.593806     -0.817794
   14   H     14    1.2000  1.000     -4.199201      1.068498     -0.929955
   15   O     15    1.5200  1.000     -3.722970     -1.013400     -0.296577
   16   H     16    1.2000  1.000     -3.778869     -1.972556     -0.093294
   17   O     17    1.5200  1.000     -1.767074     -2.593881      0.593566
   18   H     18    1.2000  1.000     -0.997749     -3.105371      0.891378
   19  Cr     19    1.5115  1.000      3.789518     -0.800029     -0.535328
 ------------------------------------------------------------------------------
 GePol: Number of generator spheres                  =      19
 GePol: Total number of spheres                      =      19
 GePol: Number of exposed spheres                    =      19 (100.00%)
 GePol: Number of points                             =    1477
 GePol: Average weight of points                     =       0.13
 GePol: Minimum weight of points                     =   0.84D-11
 GePol: Maximum weight of points                     =    0.21991
 GePol: Number of points with low weight             =      73
 GePol: Fraction of low-weight points (<1% of avg)   =       4.94%
 GePol: Cavity surface area                          =    189.010 Ang**2
 GePol: Cavity volume                                =    155.058 Ang**3
 ------------------------------------------------------------------------------
 Atomic radii for non-electrostatic terms: SMD-CDS.
 ------------------------------------------------------------------------------
 PCM non-electrostatic energy =         0.0108544538 Hartrees.
 Nuclear repulsion after PCM non-electrostatic terms =      832.1402356661 Hartrees.
 Leave Link  301 at Wed May 24 01:24:18 2023, MaxMem=  2684354560 cpu:               0.5 elap:               0.1
 (Enter /home/xut/apps/g16/l302.exe)
 NPDir=0 NMtPBC=     1 NCelOv=     1 NCel=       1 NClECP=     1 NCelD=      1
         NCelK=      1 NCelE2=     1 NClLst=     1 CellRange=     0.0.
 One-electron integrals computed using PRISM.
 One-electron integral symmetry used in STVInt
   1 Symmetry operations used in ECPInt.
 ECPInt:  NShTT=    6105 NPrTT=   23469 LenC2=    5801 LenP2D=   15766.
 LDataN:  DoStor=T MaxTD1= 4 Len=   56
 NBasis=   328 RedAO= T EigKep=  2.26D-06  NBF=   328
 NBsUse=   327 1.00D-06 EigRej=  8.12D-07 NBFU=   327
 Precomputing XC quadrature grid using
 IXCGrd= 4 IRadAn=           5 IRanWt=          -1 IRanGd=           0 AccXCQ= 0.00D+00.
 Generated NRdTot=       0 NPtTot=           0 NUsed=           0 NTot=          32
 NSgBfM=   342   342   342   342   342 MxSgAt=    19 MxSgA2=    19.
 Leave Link  302 at Wed May 24 01:24:18 2023, MaxMem=  2684354560 cpu:               2.1 elap:               0.2
 (Enter /home/xut/apps/g16/l303.exe)
 DipDrv:  MaxL=1.
 Leave Link  303 at Wed May 24 01:24:18 2023, MaxMem=  2684354560 cpu:               0.3 elap:               0.1
 (Enter /home/xut/apps/g16/l401.exe)
 Initial guess from the checkpoint file:  "149-91-7-O12-Cr.chk"
 B after Tr=    -0.000000   -0.000000    0.000000
         Rot=    0.999891    0.014101   -0.001163    0.004173 Ang=   1.69 deg.
 Guess basis will be translated and rotated to current coordinates.
 JPrj=2 DoOrth=T DoCkMO=T.
 Initial guess <Sx>= 0.0000 <Sy>= 0.0000 <Sz>= 1.5000 <S**2>= 4.7681 S= 1.7401
 Generating alternative initial guess.
 ExpMin= 1.90D-02 ExpMax= 8.59D+03 ExpMxC= 1.30D+03 IAcc=3 IRadAn=         5 AccDes= 0.00D+00
 Harris functional with IExCor= 1009 and IRadAn=       5 diagonalized for initial guess.
 HarFok:  IExCor= 1009 AccDes= 0.00D+00 IRadAn=         5 IDoV= 1 UseB2=F ITyADJ=14
 ICtDFT=  3500011 ScaDFX=  1.000000  1.000000  1.000000  1.000000
 FoFCou: FMM=F IPFlag=           0 FMFlag=      100000 FMFlg1=           0
         NFxFlg=           0 DoJE=T BraDBF=F KetDBF=T FulRan=T
         wScrn=  0.000000 ICntrl=       500 IOpCl=  0 I1Cent=   200000004 NGrid=           0
         NMat0=    1 NMatS0=      1 NMatT0=    0 NMatD0=    1 NMtDS0=    0 NMtDT0=    0
 Petite list used in FoFCou.
 Harris En= -732.143371634793    
 Leave Link  401 at Wed May 24 01:24:20 2023, MaxMem=  2684354560 cpu:              10.4 elap:               1.1
 (Enter /home/xut/apps/g16/l502.exe)
 Integral symmetry usage will be decided dynamically.
 UHF open shell SCF:
 Using DIIS extrapolation, IDIIS=  1040.
 NGot=  2684354560 LenX=  2684113999 LenY=  2683996594
 Requested convergence on RMS density matrix=1.00D-06 within 128 cycles.
 Requested convergence on MAX density matrix=1.00D-04.
 Requested convergence on             energy=1.00D-04.
 No special actions if energy rises.
 Fock matrices will be formed incrementally for  20 cycles.

 Cycle   1  Pass 1  IDiag  1:
 FoFJK:  IHMeth= 1 ICntrl=       0 DoSepK=F KAlg= 0 I1Cent=           0 FoldK=F
 IRaf= 910000000 NMat=       1 IRICut=       1 DoRegI=T DoRafI=F ISym2E= 0 IDoP0=0 IntGTp=1.
 FoFCou: FMM=F IPFlag=           0 FMFlag=      100000 FMFlg1=           0
         NFxFlg=           0 DoJE=F BraDBF=F KetDBF=F FulRan=T
         wScrn=  0.000000 ICntrl=         0 IOpCl=  1 I1Cent=           0 NGrid=           0
         NMat0=    1 NMatS0=      1 NMatT0=    0 NMatD0=    1 NMtDS0=    0 NMtDT0=    0
 Symmetry not used in FoFCou.
 Inv3:  Mode=1 IEnd=     6544587.
 Iteration    1 A*A^-1 deviation from unit magnitude is 2.78D-15 for    723.
 Iteration    1 A*A^-1 deviation from orthogonality  is 3.60D-15 for   1000    586.
 Iteration    1 A^-1*A deviation from unit magnitude is 3.66D-15 for    361.
 Iteration    1 A^-1*A deviation from orthogonality  is 1.35D-14 for   1151   1133.
 E= -732.005871437909    
 DIIS: error= 1.64D-02 at cycle   1 NSaved=   1.
 NSaved= 1 IEnMin= 1 EnMin= -732.005871437909     IErMin= 1 ErrMin= 1.64D-02
 ErrMax= 1.64D-02  0.00D+00 EMaxC= 1.00D-01 BMatC= 5.27D-01 BMatP= 5.27D-01
 IDIUse=3 WtCom= 8.36D-01 WtEn= 1.64D-01
 Coeff-Com:  0.100D+01
 Coeff-En:   0.100D+01
 Coeff:      0.100D+01
 Recover alternate guess density for next cycle.
 RMSDP=2.10D-02 MaxDP=1.36D+00              OVMax= 0.00D+00

 Cycle   2  Pass 1  IDiag  1:
 RMSU=  1.92D-02    CP:  8.47D-01
 E= -728.212619058999     Delta-E=        3.793252378910 Rises=F Damp=F
 Switch densities from cycles 1 and 2 for lowest energy.
 DIIS: error= 4.57D-02 at cycle   2 NSaved=   2.
 NSaved= 2 IEnMin= 1 EnMin= -732.005871437909     IErMin= 1 ErrMin= 1.64D-02
 ErrMax= 4.57D-02  0.00D+00 EMaxC= 1.00D+00 BMatC= 4.27D+00 BMatP= 5.27D-01
 IDIUse=1 WtCom= 1.00D+00 WtEn= 0.00D+00
 Coeff-Com:  0.873D+00 0.127D+00
 Coeff:      0.873D+00 0.127D+00
 Gap=    -0.025 Goal=   None    Shift=    0.000
 Gap=     0.259 Goal=   None    Shift=    0.000
 RMSDP=1.59D-02 MaxDP=2.49D+00 DE= 3.79D+00 OVMax= 9.56D-01

 Cycle   3  Pass 1  IDiag  1:
 RMSU=  9.91D-03    CP:  8.18D-01  3.79D-01
 E= -732.261321995423     Delta-E=       -4.048702936424 Rises=F Damp=F
 DIIS: error= 2.24D-02 at cycle   3 NSaved=   3.
 NSaved= 3 IEnMin= 3 EnMin= -732.261321995423     IErMin= 1 ErrMin= 1.64D-02
 ErrMax= 2.24D-02  0.00D+00 EMaxC= 1.00D+00 BMatC= 1.06D-01 BMatP= 5.27D-01
 IDIUse=1 WtCom= 1.00D+00 WtEn= 0.00D+00
 Coeff-Com:  0.550D-01 0.863D-01 0.859D+00
 Coeff:      0.550D-01 0.863D-01 0.859D+00
 Gap=     0.191 Goal=   None    Shift=    0.000
 Gap=     0.273 Goal=   None    Shift=    0.000
 RMSDP=4.55D-03 MaxDP=6.35D-01 DE=-4.05D+00 OVMax= 3.57D-02

 Cycle   4  Pass 1  IDiag  1:
 RMSU=  3.76D-03    CP:  8.23D-01  4.35D-01  7.68D-01
 E= -732.285004521015     Delta-E=       -0.023682525592 Rises=F Damp=F
 DIIS: error= 1.20D-02 at cycle   4 NSaved=   4.
 NSaved= 4 IEnMin= 4 EnMin= -732.285004521015     IErMin= 4 ErrMin= 1.20D-02
 ErrMax= 1.20D-02  0.00D+00 EMaxC= 1.00D+00 BMatC= 4.52D-02 BMatP= 1.06D-01
 IDIUse=1 WtCom= 1.00D+00 WtEn= 0.00D+00
 Coeff-Com: -0.759D-02 0.564D-01 0.322D+00 0.629D+00
 Coeff:     -0.759D-02 0.564D-01 0.322D+00 0.629D+00
 Gap=     0.146 Goal=   None    Shift=    0.000
 Gap=     0.278 Goal=   None    Shift=    0.000
 RMSDP=1.53D-03 MaxDP=1.79D-01 DE=-2.37D-02 OVMax= 2.12D-02

 Cycle   5  Pass 1  IDiag  1:
 RMSU=  1.36D-03    CP:  8.29D-01  4.23D-01  7.26D-01  1.09D+00
 E= -732.292303239681     Delta-E=       -0.007298718665 Rises=F Damp=F
 DIIS: error= 7.69D-03 at cycle   5 NSaved=   5.
 NSaved= 5 IEnMin= 5 EnMin= -732.292303239681     IErMin= 5 ErrMin= 7.69D-03
 ErrMax= 7.69D-03  0.00D+00 EMaxC= 1.00D+00 BMatC= 1.28D-02 BMatP= 4.52D-02
 IDIUse=1 WtCom= 1.00D+00 WtEn= 0.00D+00
 Coeff-Com:  0.293D-01 0.237D-02-0.412D+00 0.158D+00 0.122D+01
 Coeff:      0.293D-01 0.237D-02-0.412D+00 0.158D+00 0.122D+01
 Gap=     0.154 Goal=   None    Shift=    0.000
 Gap=     0.267 Goal=   None    Shift=    0.000
 RMSDP=2.51D-03 MaxDP=5.28D-01 DE=-7.30D-03 OVMax= 1.79D-02

 Cycle   6  Pass 1  IDiag  1:
 RMSU=  9.34D-04    CP:  8.59D-01  4.19D-01  6.17D-01  1.36D+00  1.53D+00
 E= -732.295677052521     Delta-E=       -0.003373812841 Rises=F Damp=F
 DIIS: error= 5.86D-04 at cycle   6 NSaved=   6.
 NSaved= 6 IEnMin= 6 EnMin= -732.295677052521     IErMin= 6 ErrMin= 5.86D-04
 ErrMax= 5.86D-04  0.00D+00 EMaxC= 1.00D+00 BMatC= 6.47D-04 BMatP= 1.28D-02
 IDIUse=1 WtCom= 1.00D+00 WtEn= 0.00D+00
 Coeff-Com:  0.145D-01-0.192D-02-0.178D+00 0.551D-01 0.470D+00 0.640D+00
 Coeff:      0.145D-01-0.192D-02-0.178D+00 0.551D-01 0.470D+00 0.640D+00
 Gap=     0.157 Goal=   None    Shift=    0.000
 Gap=     0.268 Goal=   None    Shift=    0.000
 RMSDP=2.93D-04 MaxDP=3.76D-02 DE=-3.37D-03 OVMax= 4.26D-03

 Cycle   7  Pass 1  IDiag  1:
 RMSU=  2.25D-04    CP:  8.61D-01  4.14D-01  6.11D-01  1.36D+00  1.60D+00
                    CP:  1.07D+00
 E= -732.295796829774     Delta-E=       -0.000119777253 Rises=F Damp=F
 DIIS: error= 2.58D-04 at cycle   7 NSaved=   7.
 NSaved= 7 IEnMin= 7 EnMin= -732.295796829774     IErMin= 7 ErrMin= 2.58D-04
 ErrMax= 2.58D-04  0.00D+00 EMaxC= 1.00D+00 BMatC= 1.29D-04 BMatP= 6.47D-04
 IDIUse=1 WtCom= 1.00D+00 WtEn= 0.00D+00
 Coeff-Com:  0.153D-02-0.814D-03-0.872D-02 0.174D-01 0.170D-01 0.276D+00
 Coeff-Com:  0.697D+00
 Coeff:      0.153D-02-0.814D-03-0.872D-02 0.174D-01 0.170D-01 0.276D+00
 Coeff:      0.697D+00
 Gap=     0.157 Goal=   None    Shift=    0.000
 Gap=     0.267 Goal=   None    Shift=    0.000
 RMSDP=1.35D-04 MaxDP=9.76D-03 DE=-1.20D-04 OVMax= 1.77D-03

 Cycle   8  Pass 1  IDiag  1:
 RMSU=  9.66D-05    CP:  8.60D-01  4.14D-01  6.14D-01  1.35D+00  1.57D+00
                    CP:  1.07D+00  1.13D+00
 E= -732.295826513454     Delta-E=       -0.000029683680 Rises=F Damp=F
 DIIS: error= 1.25D-04 at cycle   8 NSaved=   8.
 NSaved= 8 IEnMin= 8 EnMin= -732.295826513454     IErMin= 8 ErrMin= 1.25D-04
 ErrMax= 1.25D-04  0.00D+00 EMaxC= 1.00D+00 BMatC= 1.32D-05 BMatP= 1.29D-04
 IDIUse=1 WtCom= 1.00D+00 WtEn= 0.00D+00
 Coeff-Com: -0.867D-03-0.278D-03 0.122D-01 0.550D-02-0.277D-01 0.492D-01
 Coeff-Com:  0.249D+00 0.713D+00
 Coeff:     -0.867D-03-0.278D-03 0.122D-01 0.550D-02-0.277D-01 0.492D-01
 Coeff:      0.249D+00 0.713D+00
 Gap=     0.157 Goal=   None    Shift=    0.000
 Gap=     0.267 Goal=   None    Shift=    0.000
 RMSDP=5.29D-05 MaxDP=4.38D-03 DE=-2.97D-05 OVMax= 1.31D-03

 Cycle   9  Pass 1  IDiag  1:
 RMSU=  2.20D-05    CP:  8.60D-01  4.13D-01  6.15D-01  1.35D+00  1.57D+00
                    CP:  1.08D+00  1.23D+00  1.25D+00
 E= -732.295832954542     Delta-E=       -0.000006441088 Rises=F Damp=F
 DIIS: error= 1.07D-04 at cycle   9 NSaved=   9.
 NSaved= 9 IEnMin= 9 EnMin= -732.295832954542     IErMin= 9 ErrMin= 1.07D-04
 ErrMax= 1.07D-04  0.00D+00 EMaxC= 1.00D+00 BMatC= 3.37D-06 BMatP= 1.32D-05
 IDIUse=1 WtCom= 1.00D+00 WtEn= 0.00D+00
 Coeff-Com: -0.499D-03 0.117D-03 0.390D-02 0.153D-03-0.386D-02-0.288D-01
 Coeff-Com: -0.565D-01 0.219D+00 0.866D+00
 Coeff:     -0.499D-03 0.117D-03 0.390D-02 0.153D-03-0.386D-02-0.288D-01
 Coeff:     -0.565D-01 0.219D+00 0.866D+00
 Gap=     0.157 Goal=   None    Shift=    0.000
 Gap=     0.268 Goal=   None    Shift=    0.000
 RMSDP=3.04D-05 MaxDP=2.38D-03 DE=-6.44D-06 OVMax= 1.60D-03

 Cycle  10  Pass 1  IDiag  1:
 RMSU=  1.44D-05    CP:  8.59D-01  4.13D-01  6.15D-01  1.34D+00  1.57D+00
                    CP:  1.08D+00  1.27D+00  1.43D+00  1.43D+00
 E= -732.295837731524     Delta-E=       -0.000004776981 Rises=F Damp=F
 DIIS: error= 1.10D-04 at cycle  10 NSaved=  10.
 NSaved=10 IEnMin=10 EnMin= -732.295837731524     IErMin= 9 ErrMin= 1.07D-04
 ErrMax= 1.10D-04  0.00D+00 EMaxC= 1.00D+00 BMatC= 1.68D-06 BMatP= 3.37D-06
 IDIUse=1 WtCom= 1.00D+00 WtEn= 0.00D+00
 Coeff-Com:  0.341D-04 0.307D-04-0.971D-03-0.147D-02 0.153D-02-0.157D-01
 Coeff-Com: -0.503D-01-0.542D-01 0.192D+00 0.929D+00
 Coeff:      0.341D-04 0.307D-04-0.971D-03-0.147D-02 0.153D-02-0.157D-01
 Coeff:     -0.503D-01-0.542D-01 0.192D+00 0.929D+00
 Gap=     0.157 Goal=   None    Shift=    0.000
 Gap=     0.268 Goal=   None    Shift=    0.000
 RMSDP=2.30D-05 MaxDP=3.73D-03 DE=-4.78D-06 OVMax= 1.76D-03

 Cycle  11  Pass 1  IDiag  1:
 RMSU=  6.97D-06    CP:  8.60D-01  4.12D-01  6.15D-01  1.35D+00  1.57D+00
                    CP:  1.09D+00  1.30D+00  1.49D+00  1.73D+00  1.77D+00
 E= -732.295842181803     Delta-E=       -0.000004450280 Rises=F Damp=F
 DIIS: error= 1.10D-04 at cycle  11 NSaved=  11.
 NSaved=11 IEnMin=11 EnMin= -732.295842181803     IErMin= 9 ErrMin= 1.07D-04
 ErrMax= 1.10D-04  0.00D+00 EMaxC= 1.00D+00 BMatC= 1.53D-06 BMatP= 1.68D-06
 IDIUse=1 WtCom= 1.00D+00 WtEn= 0.00D+00
 Coeff-Com:  0.893D-04 0.129D-05-0.967D-03-0.561D-03 0.487D-03-0.353D-02
 Coeff-Com: -0.814D-02-0.507D-01-0.701D-01 0.406D+00 0.727D+00
 Coeff:      0.893D-04 0.129D-05-0.967D-03-0.561D-03 0.487D-03-0.353D-02
 Coeff:     -0.814D-02-0.507D-01-0.701D-01 0.406D+00 0.727D+00
 Gap=     0.157 Goal=   None    Shift=    0.000
 Gap=     0.268 Goal=   None    Shift=    0.000
 RMSDP=1.08D-05 MaxDP=1.32D-03 DE=-4.45D-06 OVMax= 1.48D-03

 Cycle  12  Pass 1  IDiag  1:
 RMSU=  4.29D-06    CP:  8.60D-01  4.12D-01  6.14D-01  1.35D+00  1.57D+00
                    CP:  1.09D+00  1.31D+00  1.52D+00  1.85D+00  2.19D+00
                    CP:  1.75D+00
 E= -732.295845710561     Delta-E=       -0.000003528758 Rises=F Damp=F
 DIIS: error= 1.10D-04 at cycle  12 NSaved=  12.
 NSaved=12 IEnMin=12 EnMin= -732.295845710561     IErMin= 9 ErrMin= 1.07D-04
 ErrMax= 1.10D-04  0.00D+00 EMaxC= 1.00D+00 BMatC= 1.47D-06 BMatP= 1.53D-06
 IDIUse=1 WtCom= 1.00D+00 WtEn= 0.00D+00
 Coeff-Com:  0.495D-04 0.410D-05-0.548D-03-0.160D-03 0.210D-03-0.231D-02
 Coeff-Com: -0.200D-02-0.260D-01-0.497D-01 0.213D+00 0.322D+00 0.545D+00
 Coeff:      0.495D-04 0.410D-05-0.548D-03-0.160D-03 0.210D-03-0.231D-02
 Coeff:     -0.200D-02-0.260D-01-0.497D-01 0.213D+00 0.322D+00 0.545D+00
 Gap=     0.157 Goal=   None    Shift=    0.000
 Gap=     0.268 Goal=   None    Shift=    0.000
 RMSDP=5.59D-06 MaxDP=8.41D-04 DE=-3.53D-06 OVMax= 9.44D-04

 Cycle  13  Pass 1  IDiag  1:
 RMSU=  1.20D-06    CP:  8.60D-01  4.12D-01  6.14D-01  1.35D+00  1.57D+00
                    CP:  1.09D+00  1.31D+00  1.53D+00  1.89D+00  2.36D+00
                    CP:  2.23D+00  1.77D+00
 E= -732.295847896070     Delta-E=       -0.000002185509 Rises=F Damp=F
 DIIS: error= 1.10D-04 at cycle  13 NSaved=  13.
 NSaved=13 IEnMin=13 EnMin= -732.295847896070     IErMin= 9 ErrMin= 1.07D-04
 ErrMax= 1.10D-04  0.00D+00 EMaxC= 1.00D+00 BMatC= 1.48D-06 BMatP= 1.47D-06
 IDIUse=1 WtCom= 1.00D+00 WtEn= 0.00D+00
 Coeff-Com:  0.953D-04 0.300D-05-0.886D-03 0.990D-04-0.922D-04 0.536D-03
 Coeff-Com:  0.125D-01-0.424D-01-0.195D+00 0.103D+00 0.988D+00 0.383D+01
 Coeff-Com: -0.370D+01
 Coeff:      0.953D-04 0.300D-05-0.886D-03 0.990D-04-0.922D-04 0.536D-03
 Coeff:      0.125D-01-0.424D-01-0.195D+00 0.103D+00 0.988D+00 0.383D+01
 Coeff:     -0.370D+01
 Gap=     0.157 Goal=   None    Shift=    0.000
 Gap=     0.268 Goal=   None    Shift=    0.000
 RMSDP=2.06D-05 MaxDP=3.12D-03 DE=-2.19D-06 OVMax= 3.53D-03

 Cycle  14  Pass 1  IDiag  1:
 RMSU=  2.02D-06    CP:  8.60D-01  4.12D-01  6.14D-01  1.35D+00  1.57D+00
                    CP:  1.09D+00  1.31D+00  1.52D+00  1.80D+00  1.87D+00
                    CP:  5.53D-01 -1.34D+00 -3.00D+00
 E= -732.295839970824     Delta-E=        0.000007925247 Rises=F Damp=F
 DIIS: error= 1.10D-04 at cycle  14 NSaved=  14.
 NSaved=14 IEnMin=13 EnMin= -732.295847896070     IErMin= 9 ErrMin= 1.07D-04
 ErrMax= 1.10D-04  0.00D+00 EMaxC= 1.00D+00 BMatC= 1.45D-06 BMatP= 1.47D-06
 IDIUse=1 WtCom= 1.00D+00 WtEn= 0.00D+00
 Coeff-Com:  0.725D-04 0.204D-04-0.480D-03 0.121D-02-0.211D-03 0.386D-02
 Coeff-Com:  0.363D-01-0.819D-02-0.268D+00-0.341D+00 0.450D+00 0.790D+01
 Coeff-Com: -0.933D+01 0.256D+01
 Coeff:      0.725D-04 0.204D-04-0.480D-03 0.121D-02-0.211D-03 0.386D-02
 Coeff:      0.363D-01-0.819D-02-0.268D+00-0.341D+00 0.450D+00 0.790D+01
 Coeff:     -0.933D+01 0.256D+01
 Gap=     0.157 Goal=   None    Shift=    0.000
 Gap=     0.268 Goal=   None    Shift=    0.000
 RMSDP=5.66D-05 MaxDP=8.69D-03 DE= 7.93D-06 OVMax= 9.96D-03

 Cycle  15  Pass 1  IDiag  1:
 RMSU=  3.49D-05    CP:  8.60D-01  4.12D-01  6.14D-01  1.35D+00  1.57D+00
                    CP:  1.09D+00  1.30D+00  1.49D+00  1.57D+00  5.98D-01
                    CP: -3.00D+00 -3.00D+00 -3.00D+00  3.00D+00
 E= -732.295819058015     Delta-E=        0.000020912808 Rises=F Damp=F
 DIIS: error= 1.09D-04 at cycle  15 NSaved=  15.
 NSaved=15 IEnMin=13 EnMin= -732.295847896070     IErMin= 9 ErrMin= 1.07D-04
 ErrMax= 1.09D-04  0.00D+00 EMaxC= 1.00D+00 BMatC= 1.30D-06 BMatP= 1.45D-06
 IDIUse=1 WtCom= 1.00D+00 WtEn= 0.00D+00
 Coeff-Com: -0.141D-03-0.311D-04 0.166D-02 0.405D-03-0.156D-02-0.558D-02
 Coeff-Com:  0.129D-02 0.822D-01 0.249D+00-0.370D-02-0.255D+01-0.320D+01
 Coeff-Com:  0.338D+01 0.622D+00 0.242D+01
 Coeff:     -0.141D-03-0.311D-04 0.166D-02 0.405D-03-0.156D-02-0.558D-02
 Coeff:      0.129D-02 0.822D-01 0.249D+00-0.370D-02-0.255D+01-0.320D+01
 Coeff:      0.338D+01 0.622D+00 0.242D+01
 Gap=     0.157 Goal=   None    Shift=    0.000
 Gap=     0.268 Goal=   None    Shift=    0.000
 RMSDP=7.02D-05 MaxDP=1.10D-02 DE= 2.09D-05 OVMax= 1.31D-02

 Cycle  16  Pass 1  IDiag  1:
 RMSU=  2.99D-05    CP:  8.60D-01  4.12D-01  6.13D-01  1.35D+00  1.58D+00
                    CP:  1.10D+00  1.28D+00  1.42D+00  1.11D+00 -8.99D-01
                    CP: -3.00D+00 -3.00D+00 -3.00D+00  3.00D+00  2.64D+00
 E= -732.295796086921     Delta-E=        0.000022971095 Rises=F Damp=F
 DIIS: error= 1.07D-04 at cycle  16 NSaved=  16.
 NSaved=16 IEnMin=13 EnMin= -732.295847896070     IErMin=16 ErrMin= 1.07D-04
 ErrMax= 1.07D-04  0.00D+00 EMaxC= 1.00D+00 BMatC= 1.11D-06 BMatP= 1.30D-06
 IDIUse=1 WtCom= 1.00D+00 WtEn= 0.00D+00
 Coeff-Com: -0.844D-04 0.338D-05 0.322D-03-0.466D-04 0.115D-02-0.835D-02
 Coeff-Com: -0.270D-01 0.132D-01 0.272D+00 0.501D+00-0.168D+01-0.652D+01
 Coeff-Com:  0.791D+01-0.178D+01 0.679D+00 0.163D+01
 Coeff:     -0.844D-04 0.338D-05 0.322D-03-0.466D-04 0.115D-02-0.835D-02
 Coeff:     -0.270D-01 0.132D-01 0.272D+00 0.501D+00-0.168D+01-0.652D+01
 Coeff:      0.791D+01-0.178D+01 0.679D+00 0.163D+01
 Gap=     0.157 Goal=   None    Shift=    0.000
 Gap=     0.268 Goal=   None    Shift=    0.000
 RMSDP=6.33D-05 MaxDP=9.88D-03 DE= 2.30D-05 OVMax= 1.22D-02

 Cycle  17  Pass 1  IDiag  1:
 RMSU=  3.73D-05    CP:  8.60D-01  4.12D-01  6.13D-01  1.35D+00  1.58D+00
                    CP:  1.10D+00  1.25D+00  1.33D+00  5.90D-01 -2.29D+00
                    CP: -3.00D+00 -3.00D+00 -3.00D+00  3.00D+00  3.00D+00
                    CP:  1.99D+00
 E= -732.295779483070     Delta-E=        0.000016603851 Rises=F Damp=F
 DIIS: error= 1.04D-04 at cycle  17 NSaved=  17.
 NSaved=17 IEnMin=13 EnMin= -732.295847896070     IErMin=17 ErrMin= 1.04D-04
 ErrMax= 1.04D-04  0.00D+00 EMaxC= 1.00D+00 BMatC= 9.63D-07 BMatP= 1.11D-06
 IDIUse=1 WtCom= 1.00D+00 WtEn= 0.00D+00
 Coeff-Com:  0.128D-03 0.489D-04-0.216D-02 0.635D-03 0.208D-02 0.130D-02
 Coeff-Com:  0.743D-03-0.920D-01-0.211D+00 0.253D+00 0.183D+01 0.321D+01
 Coeff-Com: -0.296D+01-0.693D+00-0.269D+01 0.764D+00 0.159D+01
 Coeff:      0.128D-03 0.489D-04-0.216D-02 0.635D-03 0.208D-02 0.130D-02
 Coeff:      0.743D-03-0.920D-01-0.211D+00 0.253D+00 0.183D+01 0.321D+01
 Coeff:     -0.296D+01-0.693D+00-0.269D+01 0.764D+00 0.159D+01
 Gap=     0.157 Goal=   None    Shift=    0.000
 Gap=     0.268 Goal=   None    Shift=    0.000
 RMSDP=5.59D-05 MaxDP=8.29D-03 DE= 1.66D-05 OVMax= 1.09D-02

 Cycle  18  Pass 1  IDiag  1:
 RMSU=  1.17D-05    CP:  8.60D-01  4.12D-01  6.13D-01  1.35D+00  1.58D+00
                    CP:  1.10D+00  1.22D+00  1.22D+00  5.53D-02 -3.00D+00
                    CP: -3.00D+00 -3.00D+00 -3.00D+00  3.00D+00  3.00D+00
                    CP:  2.95D+00  2.08D+00
 E= -732.295769740418     Delta-E=        0.000009742652 Rises=F Damp=F
 DIIS: error= 1.02D-04 at cycle  18 NSaved=  18.
 NSaved=18 IEnMin=13 EnMin= -732.295847896070     IErMin=18 ErrMin= 1.02D-04
 ErrMax= 1.02D-04  0.00D+00 EMaxC= 1.00D+00 BMatC= 7.83D-07 BMatP= 9.63D-07
 IDIUse=1 WtCom= 1.00D+00 WtEn= 0.00D+00
 Coeff-Com:  0.468D-04-0.258D-05-0.207D-04 0.346D-03-0.227D-02 0.160D-02
 Coeff-Com:  0.169D-01 0.905D-03-0.876D-01-0.247D+00 0.414D+00 0.355D+01
 Coeff-Com: -0.419D+01 0.122D+01-0.408D+00-0.682D+00-0.193D+00 0.161D+01
 Coeff:      0.468D-04-0.258D-05-0.207D-04 0.346D-03-0.227D-02 0.160D-02
 Coeff:      0.169D-01 0.905D-03-0.876D-01-0.247D+00 0.414D+00 0.355D+01
 Coeff:     -0.419D+01 0.122D+01-0.408D+00-0.682D+00-0.193D+00 0.161D+01
 Gap=     0.157 Goal=   None    Shift=    0.000
 Gap=     0.268 Goal=   None    Shift=    0.000
 RMSDP=3.36D-05 MaxDP=4.29D-03 DE= 9.74D-06 OVMax= 6.18D-03

 Cycle  19  Pass 1  IDiag  1:
 RMSU=  1.48D-05    CP:  8.60D-01  4.12D-01  6.13D-01  1.35D+00  1.58D+00
                    CP:  1.10D+00  1.20D+00  1.15D+00 -2.22D-01 -3.00D+00
                    CP: -3.00D+00 -3.00D+00 -3.00D+00  3.00D+00  3.00D+00
                    CP:  3.00D+00  2.64D+00  2.30D+00
 E= -732.295767534462     Delta-E=        0.000002205956 Rises=F Damp=F
 DIIS: error= 9.99D-05 at cycle  19 NSaved=  19.
 NSaved=19 IEnMin=13 EnMin= -732.295847896070     IErMin=19 ErrMin= 9.99D-05
 ErrMax= 9.99D-05  0.00D+00 EMaxC= 1.00D+00 BMatC= 6.96D-07 BMatP= 7.83D-07
 IDIUse=1 WtCom= 1.00D+00 WtEn= 0.00D+00
 Coeff-Com: -0.169D-04-0.688D-05 0.381D-03 0.156D-04-0.220D-03-0.140D-02
 Coeff-Com: -0.152D-02 0.205D-01 0.691D-01-0.398D-01-0.643D+00-0.105D+01
 Coeff-Com:  0.918D+00 0.311D+00 0.883D+00-0.235D+00-0.660D+00 0.105D+00
 Coeff-Com:  0.132D+01
 Coeff:     -0.169D-04-0.688D-05 0.381D-03 0.156D-04-0.220D-03-0.140D-02
 Coeff:     -0.152D-02 0.205D-01 0.691D-01-0.398D-01-0.643D+00-0.105D+01
 Coeff:      0.918D+00 0.311D+00 0.883D+00-0.235D+00-0.660D+00 0.105D+00
 Coeff:      0.132D+01
 Gap=     0.157 Goal=   None    Shift=    0.000
 Gap=     0.268 Goal=   None    Shift=    0.000
 RMSDP=1.80D-05 MaxDP=2.27D-03 DE= 2.21D-06 OVMax= 2.01D-03

 Cycle  20  Pass 1  IDiag  1:
 RMSU=  9.78D-06    CP:  8.60D-01  4.12D-01  6.12D-01  1.35D+00  1.58D+00
                    CP:  1.10D+00  1.19D+00  1.13D+00 -2.71D-01 -3.00D+00
                    CP: -3.00D+00 -3.00D+00 -3.00D+00  3.00D+00  3.00D+00
                    CP:  3.00D+00  2.76D+00  3.00D+00  1.49D+00
 E= -732.295769323070     Delta-E=       -0.000001788608 Rises=F Damp=F
 DIIS: error= 9.92D-05 at cycle  20 NSaved=  20.
 NSaved=20 IEnMin=13 EnMin= -732.295847896070     IErMin=20 ErrMin= 9.92D-05
 ErrMax= 9.92D-05  0.00D+00 EMaxC= 1.00D+00 BMatC= 6.71D-07 BMatP= 6.96D-07
 IDIUse=1 WtCom= 1.00D+00 WtEn= 0.00D+00
 Coeff-Com: -0.117D-04 0.443D-05-0.928D-04-0.322D-04 0.154D-02-0.140D-02
 Coeff-Com: -0.962D-02 0.816D-03 0.674D-01 0.131D+00-0.411D+00-0.215D+01
 Coeff-Com:  0.241D+01-0.474D+00 0.481D+00 0.222D+00-0.202D+00-0.685D+00
 Coeff-Com:  0.688D+00 0.929D+00
 Coeff:     -0.117D-04 0.443D-05-0.928D-04-0.322D-04 0.154D-02-0.140D-02
 Coeff:     -0.962D-02 0.816D-03 0.674D-01 0.131D+00-0.411D+00-0.215D+01
 Coeff:      0.241D+01-0.474D+00 0.481D+00 0.222D+00-0.202D+00-0.685D+00
 Coeff:      0.688D+00 0.929D+00
 Gap=     0.157 Goal=   None    Shift=    0.000
 Gap=     0.268 Goal=   None    Shift=    0.000
 RMSDP=1.46D-05 MaxDP=1.88D-03 DE=-1.79D-06 OVMax= 2.23D-03

 Cycle  21  Pass 1  IDiag  1:
 Restarting incremental Fock formation.
 E= -732.295771738536     Delta-E=       -0.000002415467 Rises=F Damp=F
 DIIS: error= 9.88D-05 at cycle  21 NSaved=  20.
 NSaved=20 IEnMin=12 EnMin= -732.295847896070     IErMin=20 ErrMin= 9.88D-05
 ErrMax= 9.88D-05  0.00D+00 EMaxC= 1.00D+00 BMatC= 6.55D-07 BMatP= 6.71D-07
 IDIUse=1 WtCom= 1.00D+00 WtEn= 0.00D+00
 Coeff-Com:  0.197D-04-0.286D-03 0.693D-04 0.326D-03 0.110D-02 0.188D-02
 Coeff-Com: -0.939D-02-0.327D-01-0.281D-02 0.307D+00 0.493D+00-0.383D+00
 Coeff-Com: -0.161D+00-0.466D+00 0.129D+00 0.342D+00-0.421D-01-0.653D+00
 Coeff-Com: -0.463D-01 0.152D+01
 Coeff:      0.197D-04-0.286D-03 0.693D-04 0.326D-03 0.110D-02 0.188D-02
 Coeff:     -0.939D-02-0.327D-01-0.281D-02 0.307D+00 0.493D+00-0.383D+00
 Coeff:     -0.161D+00-0.466D+00 0.129D+00 0.342D+00-0.421D-01-0.653D+00
 Coeff:     -0.463D-01 0.152D+01
 Gap=     0.157 Goal=   None    Shift=    0.000
 Gap=     0.268 Goal=   None    Shift=    0.000
 RMSDP=1.94D-05 MaxDP=2.13D-03 DE=-2.42D-06 OVMax= 3.31D-03

 Cycle  22  Pass 1  IDiag  1:
 RMSU=  1.93D-05    CP:  1.00D+00
 E= -732.295775582828     Delta-E=       -0.000003844292 Rises=F Damp=F
 DIIS: error= 9.82D-05 at cycle  22 NSaved=  20.
 NSaved=20 IEnMin=11 EnMin= -732.295847896070     IErMin=20 ErrMin= 9.82D-05
 ErrMax= 9.82D-05  0.00D+00 EMaxC= 1.00D+00 BMatC= 6.48D-07 BMatP= 6.55D-07
 IDIUse=1 WtCom= 1.00D+00 WtEn= 0.00D+00
 Coeff-Com:  0.105D-03 0.218D-04-0.142D-02 0.157D-02 0.869D-02 0.355D-02
 Coeff-Com: -0.575D-01-0.171D+00 0.387D+00 0.218D+01-0.247D+01 0.523D+00
 Coeff-Com: -0.460D+00-0.216D+00 0.239D+00 0.761D+00-0.752D+00-0.114D+01
 Coeff-Com: -0.131D+00 0.230D+01
 Coeff:      0.105D-03 0.218D-04-0.142D-02 0.157D-02 0.869D-02 0.355D-02
 Coeff:     -0.575D-01-0.171D+00 0.387D+00 0.218D+01-0.247D+01 0.523D+00
 Coeff:     -0.460D+00-0.216D+00 0.239D+00 0.761D+00-0.752D+00-0.114D+01
 Coeff:     -0.131D+00 0.230D+01
 Gap=     0.157 Goal=   None    Shift=    0.000
 Gap=     0.268 Goal=   None    Shift=    0.000
 RMSDP=4.09D-05 MaxDP=4.39D-03 DE=-3.84D-06 OVMax= 7.16D-03

 Cycle  23  Pass 1  IDiag  1:
 RMSU=  4.90D-06    CP:  1.00D+00  3.00D+00
 E= -732.295783948705     Delta-E=       -0.000008365877 Rises=F Damp=F
 DIIS: error= 9.73D-05 at cycle  23 NSaved=  20.
 NSaved=20 IEnMin=10 EnMin= -732.295847896070     IErMin=20 ErrMin= 9.73D-05
 ErrMax= 9.73D-05  0.00D+00 EMaxC= 1.00D+00 BMatC= 6.36D-07 BMatP= 6.48D-07
 IDIUse=1 WtCom= 1.00D+00 WtEn= 0.00D+00
 Coeff-Com: -0.385D-03-0.801D-04 0.435D-03-0.266D-02 0.239D-01 0.323D-01
 Coeff-Com: -0.184D+00-0.343D+00 0.658D+00-0.136D+01 0.106D+01 0.100D+01
 Coeff-Com: -0.842D+00-0.104D+01 0.101D+01 0.173D+01-0.967D+00-0.524D+01
 Coeff-Com:  0.206D+01 0.341D+01
 Coeff:     -0.385D-03-0.801D-04 0.435D-03-0.266D-02 0.239D-01 0.323D-01
 Coeff:     -0.184D+00-0.343D+00 0.658D+00-0.136D+01 0.106D+01 0.100D+01
 Coeff:     -0.842D+00-0.104D+01 0.101D+01 0.173D+01-0.967D+00-0.524D+01
 Coeff:      0.206D+01 0.341D+01
 Gap=     0.157 Goal=   None    Shift=    0.000
 Gap=     0.268 Goal=   None    Shift=    0.000
 RMSDP=1.64D-04 MaxDP=1.78D-02 DE=-8.37D-06 OVMax= 2.88D-02

 Cycle  24  Pass 1  IDiag  1:
 RMSU=  1.58D-04    CP:  1.00D+00  3.00D+00  3.00D+00
 E= -732.295816573787     Delta-E=       -0.000032625082 Rises=F Damp=F
 DIIS: error= 9.33D-05 at cycle  24 NSaved=  20.
 NSaved=20 IEnMin= 9 EnMin= -732.295847896070     IErMin=20 ErrMin= 9.33D-05
 ErrMax= 9.33D-05  0.00D+00 EMaxC= 1.00D+00 BMatC= 5.96D-07 BMatP= 6.36D-07
 IDIUse=1 WtCom= 1.00D+00 WtEn= 0.00D+00
 Coeff-Com:  0.226D-03 0.101D-03 0.878D-06 0.271D-01 0.169D-01-0.221D+00
 Coeff-Com: -0.296D+00 0.130D+01-0.213D+01 0.125D+01 0.107D+01-0.845D+00
 Coeff-Com: -0.114D+01 0.554D+00 0.218D+01 0.233D+00-0.408D+01-0.802D+00
 Coeff-Com:  0.249D+01 0.140D+01
 Coeff:      0.226D-03 0.101D-03 0.878D-06 0.271D-01 0.169D-01-0.221D+00
 Coeff:     -0.296D+00 0.130D+01-0.213D+01 0.125D+01 0.107D+01-0.845D+00
 Coeff:     -0.114D+01 0.554D+00 0.218D+01 0.233D+00-0.408D+01-0.802D+00
 Coeff:      0.249D+01 0.140D+01
 Gap=     0.157 Goal=   None    Shift=    0.000
 Gap=     0.268 Goal=   None    Shift=    0.000
 RMSDP=1.94D-04 MaxDP=2.06D-02 DE=-3.26D-05 OVMax= 3.44D-02

 Cycle  25  Pass 1  IDiag  1:
 RMSU=  2.09D-05    CP:  1.00D+00  3.00D+00  3.00D+00  2.21D+00
 E= -732.295853315379     Delta-E=       -0.000036741591 Rises=F Damp=F
 DIIS: error= 8.84D-05 at cycle  25 NSaved=  20.
 NSaved=20 IEnMin=20 EnMin= -732.295853315379     IErMin=20 ErrMin= 8.84D-05
 ErrMax= 8.84D-05  0.00D+00 EMaxC= 1.00D+00 BMatC= 6.57D-07 BMatP= 5.96D-07
 IDIUse=1 WtCom= 1.00D+00 WtEn= 0.00D+00
 Coeff-Com:  0.520D-03 0.142D-02 0.239D-01-0.301D-02-0.219D+00-0.192D+00
 Coeff-Com:  0.158D+01-0.249D+01 0.129D+01 0.103D+01-0.858D+00-0.114D+01
 Coeff-Com:  0.599D+00 0.226D+01 0.236D+00-0.437D+01-0.111D+01 0.274D+01
 Coeff-Com:  0.182D+01-0.195D+00
 Coeff:      0.520D-03 0.142D-02 0.239D-01-0.301D-02-0.219D+00-0.192D+00
 Coeff:      0.158D+01-0.249D+01 0.129D+01 0.103D+01-0.858D+00-0.114D+01
 Coeff:      0.599D+00 0.226D+01 0.236D+00-0.437D+01-0.111D+01 0.274D+01
 Coeff:      0.182D+01-0.195D+00
 Gap=     0.157 Goal=   None    Shift=    0.000
 Gap=     0.268 Goal=   None    Shift=    0.000
 RMSDP=1.77D-05 MaxDP=1.84D-03 DE=-3.67D-05 OVMax= 2.94D-03

 Cycle  26  Pass 1  IDiag  1:
 RMSU=  2.85D-06    CP:  1.00D+00  3.00D+00  3.00D+00  2.32D+00  1.05D+00
 E= -732.295856244986     Delta-E=       -0.000002929607 Rises=F Damp=F
 DIIS: error= 8.81D-05 at cycle  26 NSaved=  20.
 NSaved=20 IEnMin=20 EnMin= -732.295856244986     IErMin=20 ErrMin= 8.81D-05
 ErrMax= 8.81D-05  0.00D+00 EMaxC= 1.00D+00 BMatC= 7.71D-07 BMatP= 5.96D-07
 IDIUse=1 WtCom= 1.00D+00 WtEn= 0.00D+00
 Large coefficients: NSaved= 20 BigCof=   31.72 CofMax=   10.00 Det=-3.23D-10
 Inversion failed.  Reducing to 19 matrices.
 Large coefficients: NSaved= 19 BigCof=   29.74 CofMax=   10.00 Det=-3.80D-10
 Inversion failed.  Reducing to 18 matrices.
 Large coefficients: NSaved= 18 BigCof=   26.28 CofMax=   10.00 Det=-4.28D-10
 Inversion failed.  Reducing to 17 matrices.
 Large coefficients: NSaved= 17 BigCof=   26.31 CofMax=   10.00 Det=-4.34D-10
 Inversion failed.  Reducing to 16 matrices.
 Large coefficients: NSaved= 16 BigCof=   22.00 CofMax=   10.00 Det=-5.11D-10
 Inversion failed.  Reducing to 15 matrices.
 Large coefficients: NSaved= 15 BigCof=   20.82 CofMax=   10.00 Det=-5.22D-10
 Inversion failed.  Reducing to 14 matrices.
 Large coefficients: NSaved= 14 BigCof=   20.79 CofMax=   10.00 Det=-5.23D-10
 Inversion failed.  Reducing to 13 matrices.
 Large coefficients: NSaved= 13 BigCof=   18.92 CofMax=   10.00 Det=-5.72D-10
 Inversion failed.  Reducing to 12 matrices.
 Large coefficients: NSaved= 12 BigCof=   18.93 CofMax=   10.00 Det=-5.72D-10
 Inversion failed.  Reducing to 11 matrices.
 Large coefficients: NSaved= 11 BigCof=   18.90 CofMax=   10.00 Det=-5.74D-10
 Inversion failed.  Reducing to 10 matrices.
 Coeff-Com: -0.447D-02-0.215D-01-0.462D-01 0.210D+00 0.604D+00-0.834D+00
 Coeff-Com:  0.140D+00-0.113D+00 0.400D+01-0.293D+01
 Coeff:     -0.447D-02-0.215D-01-0.462D-01 0.210D+00 0.604D+00-0.834D+00
 Coeff:      0.140D+00-0.113D+00 0.400D+01-0.293D+01
 Gap=     0.157 Goal=   None    Shift=    0.000
 Gap=     0.268 Goal=   None    Shift=    0.000
 RMSDP=4.37D-05 MaxDP=4.12D-03 DE=-2.93D-06 OVMax= 6.69D-03

 Cycle  27  Pass 1  IDiag  1:
 RMSU=  1.45D-05    CP:  1.00D+00  3.00D+00  3.00D+00  2.08D+00  5.57D-01
                    CP: -1.66D+00
 E= -732.295848976882     Delta-E=        0.000007268103 Rises=F Damp=F
 DIIS: error= 8.75D-05 at cycle  27 NSaved=  11.
 NSaved=11 IEnMin=10 EnMin= -732.295856244986     IErMin=11 ErrMin= 8.75D-05
 ErrMax= 8.75D-05  0.00D+00 EMaxC= 1.00D+00 BMatC= 5.09D-07 BMatP= 6.57D-07
 IDIUse=1 WtCom= 1.00D+00 WtEn= 0.00D+00
 Coeff-Com:  0.382D-02-0.126D-01-0.642D-01 0.222D+00 0.472D+00-0.470D+00
 Coeff-Com:  0.210D-01-0.225D+00 0.163D+00-0.197D+00 0.109D+01
 Coeff:      0.382D-02-0.126D-01-0.642D-01 0.222D+00 0.472D+00-0.470D+00
 Coeff:      0.210D-01-0.225D+00 0.163D+00-0.197D+00 0.109D+01
 Gap=     0.157 Goal=   None    Shift=    0.000
 Gap=     0.268 Goal=   None    Shift=    0.000
 RMSDP=2.67D-05 MaxDP=3.68D-03 DE= 7.27D-06 OVMax= 4.55D-03

 Cycle  28  Pass 1  IDiag  1:
 RMSU=  1.93D-06    CP:  1.00D+00  3.00D+00  3.00D+00  2.24D+00  4.97D-01
                    CP: -2.15D+00  1.38D+00
 E= -732.295853523726     Delta-E=       -0.000004546844 Rises=F Damp=F
 DIIS: error= 8.64D-05 at cycle  28 NSaved=  12.
 NSaved=12 IEnMin=10 EnMin= -732.295856244986     IErMin=12 ErrMin= 8.64D-05
 ErrMax= 8.64D-05  0.00D+00 EMaxC= 1.00D+00 BMatC= 5.06D-07 BMatP= 5.09D-07
 IDIUse=1 WtCom= 1.00D+00 WtEn= 0.00D+00
 Coeff-Com:  0.139D-01 0.120D-01-0.642D-01 0.166D+00 0.333D+00-0.116D+00
 Coeff-Com: -0.263D-01-0.228D+00-0.713D+01 0.526D+01 0.776D+00 0.201D+01
 Coeff:      0.139D-01 0.120D-01-0.642D-01 0.166D+00 0.333D+00-0.116D+00
 Coeff:     -0.263D-01-0.228D+00-0.713D+01 0.526D+01 0.776D+00 0.201D+01
 Gap=     0.157 Goal=   None    Shift=    0.000
 Gap=     0.268 Goal=   None    Shift=    0.000
 RMSDP=6.46D-05 MaxDP=7.63D-03 DE=-4.55D-06 OVMax= 1.17D-02

 Cycle  29  Pass 1  IDiag  1:
 RMSU=  4.22D-06    CP:  1.00D+00  3.00D+00  3.00D+00  2.64D+00  8.70D-01
                    CP: -3.00D+00  1.75D+00  2.36D+00
 E= -732.295865318239     Delta-E=       -0.000011794513 Rises=F Damp=F
 DIIS: error= 8.44D-05 at cycle  29 NSaved=  13.
 NSaved=13 IEnMin=13 EnMin= -732.295865318239     IErMin=13 ErrMin= 8.44D-05
 ErrMax= 8.44D-05  0.00D+00 EMaxC= 1.00D+00 BMatC= 4.91D-07 BMatP= 5.06D-07
 IDIUse=1 WtCom= 1.00D+00 WtEn= 0.00D+00
 Large coefficients: NSaved= 13 BigCof=   14.52 CofMax=   10.00 Det=-2.01D-10
 Inversion failed.  Reducing to 12 matrices.
 Large coefficients: NSaved= 12 BigCof=   14.47 CofMax=   10.00 Det=-2.01D-10
 Inversion failed.  Reducing to 11 matrices.
 Large coefficients: NSaved= 11 BigCof=   13.21 CofMax=   10.00 Det=-2.22D-10
 Inversion failed.  Reducing to 10 matrices.
 Large coefficients: NSaved= 10 BigCof=   13.17 CofMax=   10.00 Det=-2.27D-10
 Inversion failed.  Reducing to  9 matrices.
 Large coefficients: NSaved=  9 BigCof=   12.83 CofMax=   10.00 Det=-2.30D-10
 Inversion failed.  Reducing to  8 matrices.
 Large coefficients: NSaved=  8 BigCof=   12.83 CofMax=   10.00 Det=-2.30D-10
 Inversion failed.  Reducing to  7 matrices.
 Large coefficients: NSaved=  7 BigCof=   12.87 CofMax=   10.00 Det=-2.32D-10
 Inversion failed.  Reducing to  6 matrices.
 Large coefficients: NSaved=  6 BigCof=   12.87 CofMax=   10.00 Det=-2.32D-10
 Inversion failed.  Reducing to  5 matrices.
 Coeff-Com: -0.490D+01 0.391D+01-0.266D+00 0.686D+00 0.157D+01
 Coeff:     -0.490D+01 0.391D+01-0.266D+00 0.686D+00 0.157D+01
 Gap=     0.157 Goal=   None    Shift=    0.000
 Gap=     0.268 Goal=   None    Shift=    0.000
 RMSDP=1.24D-04 MaxDP=1.67D-02 DE=-1.18D-05 OVMax= 2.12D-02

 Cycle  30  Pass 1  IDiag  1:
 RMSU=  6.44D-05    CP:  1.00D+00  3.00D+00  3.00D+00  3.00D+00  8.86D-01
                    CP: -3.00D+00  3.00D+00  3.00D+00  7.75D-01
 E= -732.295885947559     Delta-E=       -0.000020629320 Rises=F Damp=F
 DIIS: error= 7.97D-05 at cycle  30 NSaved=   6.
 NSaved= 6 IEnMin= 6 EnMin= -732.295885947559     IErMin= 6 ErrMin= 7.97D-05
 ErrMax= 7.97D-05  0.00D+00 EMaxC= 1.00D+00 BMatC= 4.64D-07 BMatP= 4.91D-07
 IDIUse=1 WtCom= 1.00D+00 WtEn= 0.00D+00
 Large coefficients: NSaved=  6 BigCof=   10.56 CofMax=   10.00 Det=-1.91D-10
 Inversion failed.  Reducing to  5 matrices.
 Large coefficients: NSaved=  5 BigCof=   10.53 CofMax=   10.00 Det=-1.92D-10
 Inversion failed.  Reducing to  4 matrices.
 Coeff-Com: -0.161D+00-0.167D+01 0.102D+01 0.182D+01
 Coeff:     -0.161D+00-0.167D+01 0.102D+01 0.182D+01
 Gap=     0.157 Goal=   None    Shift=    0.000
 Gap=     0.268 Goal=   None    Shift=    0.000
 RMSDP=2.21D-04 MaxDP=2.87D-02 DE=-2.06D-05 OVMax= 3.92D-02

 Cycle  31  Pass 1  IDiag  1:
 RMSU=  9.12D-05    CP:  1.00D+00  3.00D+00  3.00D+00  3.00D+00  1.82D+00
                    CP: -3.00D+00  3.00D+00  3.00D+00  3.00D+00  3.00D+00
 E= -732.295922103151     Delta-E=       -0.000036155592 Rises=F Damp=F
 DIIS: error= 7.17D-05 at cycle  31 NSaved=   5.
 NSaved= 5 IEnMin= 5 EnMin= -732.295922103151     IErMin= 5 ErrMin= 7.17D-05
 ErrMax= 7.17D-05  0.00D+00 EMaxC= 1.00D+00 BMatC= 6.26D-07 BMatP= 4.64D-07
 IDIUse=1 WtCom= 1.00D+00 WtEn= 0.00D+00
 Coeff-Com: -0.314D+00-0.139D+01 0.133D+01 0.900D+00 0.467D+00
 Coeff:     -0.314D+00-0.139D+01 0.133D+01 0.900D+00 0.467D+00
 Gap=     0.157 Goal=   None    Shift=    0.000
 Gap=     0.268 Goal=   None    Shift=    0.000
 RMSDP=3.77D-05 MaxDP=5.06D-03 DE=-3.62D-05 OVMax= 6.90D-03

 Cycle  32  Pass 1  IDiag  1:
 RMSU=  6.30D-06    CP:  1.00D+00  3.00D+00  3.00D+00  3.00D+00  2.07D+00
                    CP: -3.00D+00  3.00D+00  3.00D+00  3.00D+00  3.00D+00
                    CP:  1.40D+00
 E= -732.295928117334     Delta-E=       -0.000006014183 Rises=F Damp=F
 DIIS: error= 7.02D-05 at cycle  32 NSaved=   6.
 NSaved= 6 IEnMin= 6 EnMin= -732.295928117334     IErMin= 6 ErrMin= 7.02D-05
 ErrMax= 7.02D-05  0.00D+00 EMaxC= 1.00D+00 BMatC= 5.61D-07 BMatP= 4.64D-07
 IDIUse=1 WtCom= 1.00D+00 WtEn= 0.00D+00
 Coeff-Com: -0.353D+00 0.184D+01 0.229D+01-0.585D+01-0.307D+01 0.613D+01
 Coeff:     -0.353D+00 0.184D+01 0.229D+01-0.585D+01-0.307D+01 0.613D+01
 Gap=     0.157 Goal=   None    Shift=    0.000
 Gap=     0.268 Goal=   None    Shift=    0.000
 RMSDP=1.10D-04 MaxDP=1.19D-02 DE=-6.01D-06 OVMax= 2.00D-02

 Cycle  33  Pass 1  IDiag  1:
 RMSU=  4.89D-05    CP:  1.00D+00  3.00D+00  3.00D+00  3.00D+00  3.00D+00
                    CP: -3.00D+00  3.00D+00  3.00D+00  3.00D+00  3.00D+00
                    CP:  2.34D+00  3.00D+00
 E= -732.295943133571     Delta-E=       -0.000015016236 Rises=F Damp=F
 DIIS: error= 6.48D-05 at cycle  33 NSaved=   7.
 NSaved= 7 IEnMin= 7 EnMin= -732.295943133571     IErMin= 7 ErrMin= 6.48D-05
 ErrMax= 6.48D-05  0.00D+00 EMaxC= 1.00D+00 BMatC= 1.39D-06 BMatP= 4.64D-07
 IDIUse=1 WtCom= 1.00D+00 WtEn= 0.00D+00
 Coeff-Com:  0.665D+00 0.309D+01 0.511D+00-0.789D+01-0.352D+01 0.738D+01
 Coeff-Com:  0.771D+00
 Coeff:      0.665D+00 0.309D+01 0.511D+00-0.789D+01-0.352D+01 0.738D+01
 Coeff:      0.771D+00
 Gap=     0.157 Goal=   None    Shift=    0.000
 Gap=     0.268 Goal=   None    Shift=    0.000
 RMSDP=3.06D-04 MaxDP=3.79D-02 DE=-1.50D-05 OVMax= 5.70D-02

 Cycle  34  Pass 1  IDiag  1:
 RMSU=  2.41D-04    CP:  1.00D+00  3.00D+00  3.00D+00  3.00D+00  3.00D+00
                    CP: -3.00D+00  3.00D+00  3.00D+00  3.00D+00  3.00D+00
                    CP:  3.00D+00  3.00D+00  2.27D+00
 E= -732.295983409486     Delta-E=       -0.000040275915 Rises=F Damp=F
 DIIS: error= 5.17D-05 at cycle  34 NSaved=   8.
 NSaved= 8 IEnMin= 8 EnMin= -732.295983409486     IErMin= 8 ErrMin= 5.17D-05
 ErrMax= 5.17D-05  0.00D+00 EMaxC= 1.00D+00 BMatC= 5.24D-07 BMatP= 4.64D-07
 IDIUse=1 WtCom= 1.00D+00 WtEn= 0.00D+00
 Coeff-Com:  0.963D-01 0.376D+01 0.735D+00-0.761D+01-0.335D+01 0.663D+01
 Coeff-Com: -0.117D-01 0.753D+00
 Coeff:      0.963D-01 0.376D+01 0.735D+00-0.761D+01-0.335D+01 0.663D+01
 Coeff:     -0.117D-01 0.753D+00
 Gap=     0.157 Goal=   None    Shift=    0.000
 Gap=     0.268 Goal=   None    Shift=    0.000
 RMSDP=3.96D-05 MaxDP=4.43D-03 DE=-4.03D-05 OVMax= 5.14D-03

 Cycle  35  Pass 1  IDiag  1:
 RMSU=  7.24D-06    CP:  1.00D+00  3.00D+00  3.00D+00  3.00D+00  3.00D+00
                    CP: -3.00D+00  3.00D+00  3.00D+00  3.00D+00  3.00D+00
                    CP:  3.00D+00  3.00D+00  3.00D+00  1.04D+00
 E= -732.295985058416     Delta-E=       -0.000001648930 Rises=F Damp=F
 DIIS: error= 5.86D-05 at cycle  35 NSaved=   9.
 NSaved= 9 IEnMin= 9 EnMin= -732.295985058416     IErMin= 8 ErrMin= 5.17D-05
 ErrMax= 5.86D-05  0.00D+00 EMaxC= 1.00D+00 BMatC= 2.03D-06 BMatP= 4.64D-07
 IDIUse=1 WtCom= 1.00D+00 WtEn= 0.00D+00
 Coeff-Com:  0.203D+00 0.373D+01 0.638D+00-0.766D+01-0.346D+01 0.672D+01
 Coeff-Com:  0.165D+00 0.781D+00-0.115D+00
 Coeff:      0.203D+00 0.373D+01 0.638D+00-0.766D+01-0.346D+01 0.672D+01
 Coeff:      0.165D+00 0.781D+00-0.115D+00
 Gap=     0.157 Goal=   None    Shift=    0.000
 Gap=     0.268 Goal=   None    Shift=    0.000
 RMSDP=3.53D-06 MaxDP=4.61D-04 DE=-1.65D-06 OVMax= 2.19D-04

 Cycle  36  Pass 1  IDiag  1:
 RMSU=  1.31D-06    CP:  1.00D+00  3.00D+00  3.00D+00  3.00D+00  3.00D+00
                    CP: -3.00D+00  3.00D+00  3.00D+00  3.00D+00  3.00D+00
                    CP:  3.00D+00  3.00D+00  2.96D+00  1.04D+00  8.12D-01
 E= -732.295985035747     Delta-E=        0.000000022670 Rises=F Damp=F
 DIIS: error= 5.48D-05 at cycle  36 NSaved=  10.
 NSaved=10 IEnMin= 9 EnMin= -732.295985058416     IErMin= 8 ErrMin= 5.17D-05
 ErrMax= 5.48D-05  0.00D+00 EMaxC= 1.00D+00 BMatC= 1.80D-06 BMatP= 4.64D-07
 IDIUse=1 WtCom= 1.00D+00 WtEn= 0.00D+00
 Coeff-Com:  0.492D+00 0.412D+01 0.712D+00-0.905D+01-0.396D+01 0.781D+01
 Coeff-Com:  0.215D+00 0.128D+01 0.571D+01-0.633D+01
 Coeff:      0.492D+00 0.412D+01 0.712D+00-0.905D+01-0.396D+01 0.781D+01
 Coeff:      0.215D+00 0.128D+01 0.571D+01-0.633D+01
 Gap=     0.157 Goal=   None    Shift=    0.000
 Gap=     0.268 Goal=   None    Shift=    0.000
 RMSDP=5.04D-05 MaxDP=6.15D-03 DE= 2.27D-08 OVMax= 9.46D-03

 Cycle  37  Pass 1  IDiag  1:
 RMSU=  8.54D-06    CP:  1.00D+00  3.00D+00  3.00D+00  3.00D+00  3.00D+00
                    CP: -3.00D+00  3.00D+00  3.00D+00  3.00D+00  3.00D+00
                    CP:  3.00D+00  3.00D+00  3.00D+00  1.24D+00  1.35D+00
                    CP: -3.00D+00
 E= -732.295990532683     Delta-E=       -0.000005496937 Rises=F Damp=F
 DIIS: error= 5.34D-05 at cycle  37 NSaved=  11.
 NSaved=11 IEnMin=11 EnMin= -732.295990532683     IErMin= 8 ErrMin= 5.17D-05
 ErrMax= 5.34D-05  0.00D+00 EMaxC= 1.00D+00 BMatC= 1.70D-06 BMatP= 4.64D-07
 IDIUse=1 WtCom= 1.00D+00 WtEn= 0.00D+00
 Coeff-Com:  0.374D+00 0.429D+01 0.109D+00-0.837D+01-0.332D+01 0.706D+01
 Coeff-Com: -0.262D+00 0.302D+00-0.463D+01 0.829D+01-0.284D+01
 Coeff:      0.374D+00 0.429D+01 0.109D+00-0.837D+01-0.332D+01 0.706D+01
 Coeff:     -0.262D+00 0.302D+00-0.463D+01 0.829D+01-0.284D+01
 Gap=     0.157 Goal=   None    Shift=    0.000
 Gap=     0.268 Goal=   None    Shift=    0.000
 RMSDP=2.72D-05 MaxDP=2.74D-03 DE=-5.50D-06 OVMax= 3.56D-03

 Cycle  38  Pass 1  IDiag  1:
 RMSU=  3.34D-06    CP:  1.00D+00  3.00D+00  3.00D+00  3.00D+00  3.00D+00
                    CP: -3.00D+00  3.00D+00  3.00D+00  3.00D+00  3.00D+00
                    CP:  3.00D+00  3.00D+00  3.00D+00  1.35D+00  7.89D-01
                    CP: -2.82D+00  2.58D-01
 E= -732.295993092090     Delta-E=       -0.000002559407 Rises=F Damp=F
 DIIS: error= 4.67D-05 at cycle  38 NSaved=  12.
 NSaved=12 IEnMin=12 EnMin= -732.295993092090     IErMin=12 ErrMin= 4.67D-05
 ErrMax= 4.67D-05  0.00D+00 EMaxC= 1.00D+00 BMatC= 8.50D-07 BMatP= 4.64D-07
 IDIUse=1 WtCom= 1.00D+00 WtEn= 0.00D+00
 Large coefficients: NSaved= 12 BigCof=   17.56 CofMax=   10.00 Det=-3.81D-11
 Inversion failed.  Reducing to 11 matrices.
 Large coefficients: NSaved= 11 BigCof=   19.34 CofMax=   10.00 Det=-3.82D-11
 Inversion failed.  Reducing to 10 matrices.
 Large coefficients: NSaved= 10 BigCof=   19.27 CofMax=   10.00 Det=-4.11D-11
 Inversion failed.  Reducing to  9 matrices.
 Large coefficients: NSaved=  9 BigCof=   27.39 CofMax=   10.00 Det=-5.70D-11
 Inversion failed.  Reducing to  8 matrices.
 Large coefficients: NSaved=  8 BigCof=   26.76 CofMax=   10.00 Det=-5.91D-11
 Inversion failed.  Reducing to  7 matrices.
 Large coefficients: NSaved=  7 BigCof=   26.34 CofMax=   10.00 Det=-5.96D-11
 Inversion failed.  Reducing to  6 matrices.
 Large coefficients: NSaved=  6 BigCof=   27.18 CofMax=   10.00 Det=-6.06D-11
 Inversion failed.  Reducing to  5 matrices.
 Large coefficients: NSaved=  5 BigCof=   17.17 CofMax=   10.00 Det=-7.19D-11
 Inversion failed.  Reducing to  4 matrices.
 Coeff-Com: -0.510D+01 0.853D+01-0.435D+01 0.192D+01
 Coeff:     -0.510D+01 0.853D+01-0.435D+01 0.192D+01
 Gap=     0.157 Goal=   None    Shift=    0.000
 Gap=     0.268 Goal=   None    Shift=    0.000
 RMSDP=1.56D-04 MaxDP=1.84D-02 DE=-2.56D-06 OVMax= 2.99D-02

 Cycle  39  Pass 1  IDiag  1:
 RMSU=  1.08D-05    CP:  1.00D+00  3.00D+00  3.00D+00  3.00D+00  3.00D+00
                    CP: -3.00D+00  3.00D+00  3.00D+00  3.00D+00  3.00D+00
                    CP:  3.00D+00  3.00D+00  1.57D+00  7.88D-01 -5.42D-01
                    CP:  2.53D+00  3.13D-01  6.22D-01
 E= -732.295976330896     Delta-E=        0.000016761194 Rises=F Damp=F
 DIIS: error= 5.42D-05 at cycle  39 NSaved=   5.
 NSaved= 5 IEnMin= 4 EnMin= -732.295993092090     IErMin= 4 ErrMin= 4.67D-05
 ErrMax= 5.42D-05  0.00D+00 EMaxC= 1.00D+00 BMatC= 3.10D-07 BMatP= 8.50D-07
 IDIUse=1 WtCom= 1.00D+00 WtEn= 0.00D+00
 Coeff-Com:  0.324D+01-0.235D+01-0.202D+01 0.146D+01 0.673D+00
 Coeff:      0.324D+01-0.235D+01-0.202D+01 0.146D+01 0.673D+00
 Gap=     0.157 Goal=   None    Shift=    0.000
 Gap=     0.268 Goal=   None    Shift=    0.000
 RMSDP=3.62D-05 MaxDP=4.72D-03 DE= 1.68D-05 OVMax= 6.85D-03

 Cycle  40  Pass 1  IDiag  1:
 RMSU=  2.20D-06    CP:  1.00D+00  3.00D+00  3.00D+00  3.00D+00  3.00D+00
                    CP: -3.00D+00  3.00D+00  3.00D+00  3.00D+00  3.00D+00
                    CP:  3.00D+00  3.00D+00  1.81D+00  9.28D-01 -5.69D-02
                    CP:  1.55D+00  7.19D-02  3.17D-01  7.80D-01
 E= -732.295980854599     Delta-E=       -0.000004523703 Rises=F Damp=F
 DIIS: error= 5.19D-05 at cycle  40 NSaved=   6.
 NSaved= 6 IEnMin= 4 EnMin= -732.295993092090     IErMin= 4 ErrMin= 4.67D-05
 ErrMax= 5.19D-05  0.00D+00 EMaxC= 1.00D+00 BMatC= 2.74D-07 BMatP= 3.10D-07
 IDIUse=1 WtCom= 1.00D+00 WtEn= 0.00D+00
 Coeff-Com:  0.392D+01-0.420D+01-0.530D+00 0.889D+00 0.295D+00 0.626D+00
 Coeff:      0.392D+01-0.420D+01-0.530D+00 0.889D+00 0.295D+00 0.626D+00
 Gap=     0.157 Goal=   None    Shift=    0.000
 Gap=     0.268 Goal=   None    Shift=    0.000
 RMSDP=3.74D-05 MaxDP=4.82D-03 DE=-4.52D-06 OVMax= 7.09D-03

 Cycle  41  Pass 1  IDiag  1:
 Restarting incremental Fock formation.
 E= -732.295985346612     Delta-E=       -0.000004492013 Rises=F Damp=F
 DIIS: error= 4.99D-05 at cycle  41 NSaved=   7.
 NSaved= 7 IEnMin= 4 EnMin= -732.295993092090     IErMin= 4 ErrMin= 4.67D-05
 ErrMax= 4.99D-05  0.00D+00 EMaxC= 1.00D+00 BMatC= 2.66D-07 BMatP= 2.74D-07
 IDIUse=1 WtCom= 1.00D+00 WtEn= 0.00D+00
 Coeff-Com:  0.666D+00-0.712D+00-0.288D+00 0.436D+00-0.171D+00-0.577D+00
 Coeff-Com:  0.165D+01
 Coeff:      0.666D+00-0.712D+00-0.288D+00 0.436D+00-0.171D+00-0.577D+00
 Coeff:      0.165D+01
 Gap=     0.157 Goal=   None    Shift=    0.000
 Gap=     0.268 Goal=   None    Shift=    0.000
 RMSDP=5.69D-05 MaxDP=7.44D-03 DE=-4.49D-06 OVMax= 1.07D-02

 Cycle  42  Pass 1  IDiag  1:
 RMSU=  5.69D-05    CP:  1.00D+00
 E= -732.295991948801     Delta-E=       -0.000006602189 Rises=F Damp=F
 DIIS: error= 4.72D-05 at cycle  42 NSaved=   8.
 NSaved= 8 IEnMin= 4 EnMin= -732.295993092090     IErMin= 4 ErrMin= 4.67D-05
 ErrMax= 4.72D-05  0.00D+00 EMaxC= 1.00D+00 BMatC= 2.65D-07 BMatP= 2.66D-07
 IDIUse=1 WtCom= 1.00D+00 WtEn= 0.00D+00
 Coeff-Com: -0.205D+01 0.371D+01-0.188D+01 0.593D+00-0.261D-01-0.180D+01
 Coeff-Com:  0.947D+00 0.151D+01
 Coeff:     -0.205D+01 0.371D+01-0.188D+01 0.593D+00-0.261D-01-0.180D+01
 Coeff:      0.947D+00 0.151D+01
 Gap=     0.157 Goal=   None    Shift=    0.000
 Gap=     0.268 Goal=   None    Shift=    0.000
 RMSDP=5.19D-05 MaxDP=7.04D-03 DE=-6.60D-06 OVMax= 9.59D-03

 Cycle  43  Pass 1  IDiag  1:
 RMSU=  3.34D-06    CP:  1.00D+00  1.91D+00
 E= -732.295997868489     Delta-E=       -0.000005919688 Rises=F Damp=F
 DIIS: error= 4.51D-05 at cycle  43 NSaved=   9.
 NSaved= 9 IEnMin= 9 EnMin= -732.295997868489     IErMin= 9 ErrMin= 4.51D-05
 ErrMax= 4.51D-05  0.00D+00 EMaxC= 1.00D+00 BMatC= 2.78D-07 BMatP= 2.65D-07
 IDIUse=1 WtCom= 1.00D+00 WtEn= 0.00D+00
 Large coefficients: NSaved=  9 BigCof=   16.43 CofMax=   10.00 Det=-3.62D-11
 Inversion failed.  Reducing to  8 matrices.
 Coeff-Com: -0.564D+01 0.867D+01-0.328D+01 0.842D+00-0.345D+01 0.182D+01
 Coeff-Com:  0.387D+01-0.183D+01
 Coeff:     -0.564D+01 0.867D+01-0.328D+01 0.842D+00-0.345D+01 0.182D+01
 Coeff:      0.387D+01-0.183D+01
 Gap=     0.157 Goal=   None    Shift=    0.000
 Gap=     0.268 Goal=   None    Shift=    0.000
 RMSDP=5.81D-05 MaxDP=7.93D-03 DE=-5.92D-06 OVMax= 1.08D-02

 Cycle  44  Pass 1  IDiag  1:
 RMSU=  3.84D-06    CP:  1.00D+00  8.97D-01 -9.73D-01
 E= -732.295991177573     Delta-E=        0.000006690916 Rises=F Damp=F
 DIIS: error= 4.79D-05 at cycle  44 NSaved=   9.
 NSaved= 9 IEnMin= 8 EnMin= -732.295997868489     IErMin= 8 ErrMin= 4.51D-05
 ErrMax= 4.79D-05  0.00D+00 EMaxC= 1.00D+00 BMatC= 2.91D-07 BMatP= 2.65D-07
 IDIUse=1 WtCom= 1.00D+00 WtEn= 0.00D+00
 Large coefficients: NSaved=  9 BigCof=   22.64 CofMax=   10.00 Det=-4.81D-11
 Inversion failed.  Reducing to  8 matrices.
 Coeff-Com:  0.429D+01-0.523D+01 0.508D+00 0.378D+00-0.715D-01 0.143D+01
 Coeff-Com: -0.147D+01 0.117D+01
 Coeff:      0.429D+01-0.523D+01 0.508D+00 0.378D+00-0.715D-01 0.143D+01
 Coeff:     -0.147D+01 0.117D+01
 Gap=     0.157 Goal=   None    Shift=    0.000
 Gap=     0.268 Goal=   None    Shift=    0.000
 RMSDP=1.15D-05 MaxDP=1.86D-03 DE= 6.69D-06 OVMax= 1.51D-03

 Cycle  45  Pass 1  IDiag  1:
 RMSU=  2.26D-06    CP:  1.00D+00  7.24D-01 -2.03D+00 -4.67D-02
 E= -732.295989785786     Delta-E=        0.000001391787 Rises=F Damp=F
 DIIS: error= 4.75D-05 at cycle  45 NSaved=   9.
 NSaved= 9 IEnMin= 7 EnMin= -732.295997868489     IErMin= 7 ErrMin= 4.51D-05
 ErrMax= 4.75D-05  0.00D+00 EMaxC= 1.00D+00 BMatC= 2.58D-07 BMatP= 2.65D-07
 IDIUse=1 WtCom= 1.00D+00 WtEn= 0.00D+00
 Large coefficients: NSaved=  9 BigCof=   16.12 CofMax=   10.00 Det=-1.29D-10
 Inversion failed.  Reducing to  8 matrices.
 Large coefficients: NSaved=  8 BigCof=   15.97 CofMax=   10.00 Det=-3.70D-10
 Inversion failed.  Reducing to  7 matrices.
 Large coefficients: NSaved=  7 BigCof=   10.22 CofMax=   10.00 Det=-5.49D-10
 Inversion failed.  Reducing to  6 matrices.
 Coeff-Com: -0.148D+00 0.304D+00 0.645D+00-0.148D+01 0.677D+00 0.999D+00
 Coeff:     -0.148D+00 0.304D+00 0.645D+00-0.148D+01 0.677D+00 0.999D+00
 Gap=     0.157 Goal=   None    Shift=    0.000
 Gap=     0.268 Goal=   None    Shift=    0.000
 RMSDP=6.94D-05 MaxDP=9.61D-03 DE= 1.39D-06 OVMax= 1.28D-02

 Cycle  46  Pass 1  IDiag  1:
 RMSU=  3.07D-06    CP:  1.00D+00 -4.90D-01 -3.00D+00  1.89D-01  1.74D+00
 E= -732.295981462265     Delta-E=        0.000008323521 Rises=F Damp=F
 DIIS: error= 5.08D-05 at cycle  46 NSaved=   7.
 NSaved= 7 IEnMin= 4 EnMin= -732.295997868489     IErMin= 4 ErrMin= 4.51D-05
 ErrMax= 5.08D-05  0.00D+00 EMaxC= 1.00D+00 BMatC= 2.53D-07 BMatP= 2.58D-07
 IDIUse=1 WtCom= 1.00D+00 WtEn= 0.00D+00
 Coeff-Com:  0.126D+01-0.162D+01-0.951D+01 0.860D+01-0.394D+01 0.974D+00
 Coeff-Com:  0.525D+01
 Coeff:      0.126D+01-0.162D+01-0.951D+01 0.860D+01-0.394D+01 0.974D+00
 Coeff:      0.525D+01
 Gap=     0.157 Goal=   None    Shift=    0.000
 Gap=     0.268 Goal=   None    Shift=    0.000
 RMSDP=6.72D-05 MaxDP=9.69D-03 DE= 8.32D-06 OVMax= 1.31D-02

 Cycle  47  Pass 1  IDiag  1:
 RMSU=  1.34D-05    CP:  1.00D+00  6.08D-01 -3.00D+00 -3.00D+00  3.00D+00
                    CP:  3.00D+00
 E= -732.295987911867     Delta-E=       -0.000006449602 Rises=F Damp=F
 DIIS: error= 4.70D-05 at cycle  47 NSaved=   8.
 NSaved= 8 IEnMin= 4 EnMin= -732.295997868489     IErMin= 4 ErrMin= 4.51D-05
 ErrMax= 4.70D-05  0.00D+00 EMaxC= 1.00D+00 BMatC= 3.00D-07 BMatP= 2.53D-07
 IDIUse=1 WtCom= 1.00D+00 WtEn= 0.00D+00
 Large coefficients: NSaved=  8 BigCof=   14.17 CofMax=   10.00 Det=-2.95D-10
 Inversion failed.  Reducing to  7 matrices.
 Large coefficients: NSaved=  7 BigCof=   14.18 CofMax=   10.00 Det=-3.02D-10
 Inversion failed.  Reducing to  6 matrices.
 Large coefficients: NSaved=  6 BigCof=   11.50 CofMax=   10.00 Det=-5.29D-10
 Inversion failed.  Reducing to  5 matrices.
 Coeff-Com: -0.114D+00-0.502D+01 0.319D+01 0.178D+01 0.117D+01
 Coeff:     -0.114D+00-0.502D+01 0.319D+01 0.178D+01 0.117D+01
 Gap=     0.157 Goal=   None    Shift=    0.000
 Gap=     0.268 Goal=   None    Shift=    0.000
 RMSDP=2.23D-05 MaxDP=3.28D-03 DE=-6.45D-06 OVMax= 3.05D-03

 Cycle  48  Pass 1  IDiag  1:
 RMSU=  1.26D-05    CP:  1.00D+00  8.21D-01 -3.00D+00 -3.00D+00  3.00D+00
                    CP:  3.00D+00  2.02D+00
 E= -732.295988853119     Delta-E=       -0.000000941252 Rises=F Damp=F
 DIIS: error= 4.59D-05 at cycle  48 NSaved=   6.
 NSaved= 6 IEnMin= 3 EnMin= -732.295997868489     IErMin= 3 ErrMin= 4.51D-05
 ErrMax= 4.59D-05  0.00D+00 EMaxC= 1.00D+00 BMatC= 2.10D-07 BMatP= 2.53D-07
 IDIUse=1 WtCom= 1.00D+00 WtEn= 0.00D+00
 Coeff-Com: -0.250D+00-0.583D+01 0.396D+01 0.105D+01 0.114D+01 0.940D+00
 Coeff:     -0.250D+00-0.583D+01 0.396D+01 0.105D+01 0.114D+01 0.940D+00
 Gap=     0.157 Goal=   None    Shift=    0.000
 Gap=     0.268 Goal=   None    Shift=    0.000
 RMSDP=9.69D-05 MaxDP=1.39D-02 DE=-9.41D-07 OVMax= 1.86D-02

 Cycle  49  Pass 1  IDiag  1:
 RMSU=  1.96D-05    CP:  1.00D+00  2.41D+00 -3.00D+00 -3.00D+00  3.00D+00
                    CP:  3.00D+00  3.00D+00  2.09D+00
 E= -732.295997530929     Delta-E=       -0.000008677810 Rises=F Damp=F
 DIIS: error= 3.99D-05 at cycle  49 NSaved=   7.
 NSaved= 7 IEnMin= 3 EnMin= -732.295997868489     IErMin= 7 ErrMin= 3.99D-05
 ErrMax= 3.99D-05  0.00D+00 EMaxC= 1.00D+00 BMatC= 1.48D-07 BMatP= 2.10D-07
 IDIUse=1 WtCom= 1.00D+00 WtEn= 0.00D+00
 Coeff-Com: -0.116D+00-0.292D+01 0.258D+01-0.322D+00 0.409D+00 0.436D+00
 Coeff-Com:  0.940D+00
 Coeff:     -0.116D+00-0.292D+01 0.258D+01-0.322D+00 0.409D+00 0.436D+00
 Coeff:      0.940D+00
 Gap=     0.157 Goal=   None    Shift=    0.000
 Gap=     0.268 Goal=   None    Shift=    0.000
 RMSDP=1.45D-04 MaxDP=1.72D-02 DE=-8.68D-06 OVMax= 2.78D-02

 Cycle  50  Pass 1  IDiag  1:
 RMSU=  1.10D-04    CP:  1.00D+00  3.00D+00 -3.00D+00 -3.00D+00  3.00D+00
                    CP:  3.00D+00  3.00D+00  2.64D+00  1.90D+00
 E= -732.296009190306     Delta-E=       -0.000011659377 Rises=F Damp=F
 DIIS: error= 3.11D-05 at cycle  50 NSaved=   8.
 NSaved= 8 IEnMin= 8 EnMin= -732.296009190306     IErMin= 8 ErrMin= 3.11D-05
 ErrMax= 3.11D-05  0.00D+00 EMaxC= 1.00D+00 BMatC= 1.85D-07 BMatP= 1.48D-07
 IDIUse=1 WtCom= 1.00D+00 WtEn= 0.00D+00
 Coeff-Com: -0.388D-01-0.164D+01 0.134D+01-0.287D+00 0.406D+00 0.323D+00
 Coeff-Com:  0.492D+00 0.403D+00
 Coeff:     -0.388D-01-0.164D+01 0.134D+01-0.287D+00 0.406D+00 0.323D+00
 Coeff:      0.492D+00 0.403D+00
 Gap=     0.157 Goal=   None    Shift=    0.000
 Gap=     0.268 Goal=   None    Shift=    0.000
 RMSDP=1.09D-05 MaxDP=1.61D-03 DE=-1.17D-05 OVMax= 1.66D-03

 Cycle  51  Pass 1  IDiag  1:
 RMSU=  2.12D-06    CP:  1.00D+00  3.00D+00 -3.00D+00 -3.00D+00  3.00D+00
                    CP:  3.00D+00  3.00D+00  2.57D+00  2.07D+00  9.07D-01
 E= -732.296008533029     Delta-E=        0.000000657277 Rises=F Damp=F
 DIIS: error= 3.12D-05 at cycle  51 NSaved=   9.
 NSaved= 9 IEnMin= 8 EnMin= -732.296009190306     IErMin= 8 ErrMin= 3.11D-05
 ErrMax= 3.12D-05  0.00D+00 EMaxC= 1.00D+00 BMatC= 1.27D-07 BMatP= 1.48D-07
 IDIUse=1 WtCom= 1.00D+00 WtEn= 0.00D+00
 Coeff-Com:  0.254D+00 0.994D+01-0.692D+01-0.210D+01-0.860D+00-0.116D+01
 Coeff-Com: -0.195D+01-0.315D+01 0.695D+01
 Coeff:      0.254D+00 0.994D+01-0.692D+01-0.210D+01-0.860D+00-0.116D+01
 Coeff:     -0.195D+01-0.315D+01 0.695D+01
 Gap=     0.157 Goal=   None    Shift=    0.000
 Gap=     0.268 Goal=   None    Shift=    0.000
 RMSDP=2.70D-04 MaxDP=3.57D-02 DE= 6.57D-07 OVMax= 5.23D-02

 Cycle  52  Pass 1  IDiag  1:
 RMSU=  5.01D-05    CP:  1.00D+00  3.00D+00 -3.00D+00 -3.00D+00  3.00D+00
                    CP:  3.00D+00  3.00D+00  2.95D+00  3.00D+00  3.00D+00
                    CP:  3.00D+00
 E= -732.296023546274     Delta-E=       -0.000015013245 Rises=F Damp=F
 DIIS: error= 2.65D-05 at cycle  52 NSaved=  10.
 NSaved=10 IEnMin=10 EnMin= -732.296023546274     IErMin=10 ErrMin= 2.65D-05
 ErrMax= 2.65D-05  0.00D+00 EMaxC= 1.00D+00 BMatC= 4.20D-07 BMatP= 1.27D-07
 IDIUse=1 WtCom= 1.00D+00 WtEn= 0.00D+00
 Coeff-Com:  0.297D+00 0.587D+01-0.399D+01-0.150D+01-0.323D+00-0.776D+00
 Coeff-Com: -0.142D+01-0.337D+01 0.567D+01 0.539D+00
 Coeff:      0.297D+00 0.587D+01-0.399D+01-0.150D+01-0.323D+00-0.776D+00
 Coeff:     -0.142D+01-0.337D+01 0.567D+01 0.539D+00
 Gap=     0.157 Goal=   None    Shift=    0.000
 Gap=     0.268 Goal=   None    Shift=    0.000
 RMSDP=6.65D-05 MaxDP=8.88D-03 DE=-1.50D-05 OVMax= 1.29D-02

 Cycle  53  Pass 1  IDiag  1:
 RMSU=  3.72D-05    CP:  1.00D+00  3.00D+00 -3.00D+00 -3.00D+00  3.00D+00
                    CP:  3.00D+00  3.00D+00  2.36D+00  3.00D+00  3.00D+00
                    CP:  3.00D+00  2.09D+00
 E= -732.296025827581     Delta-E=       -0.000002281307 Rises=F Damp=F
 DIIS: error= 2.76D-05 at cycle  53 NSaved=  11.
 NSaved=11 IEnMin=11 EnMin= -732.296025827581     IErMin=10 ErrMin= 2.65D-05
 ErrMax= 2.76D-05  0.00D+00 EMaxC= 1.00D+00 BMatC= 4.14D-07 BMatP= 1.27D-07
 IDIUse=1 WtCom= 1.00D+00 WtEn= 0.00D+00
 Coeff-Com:  0.233D+00 0.144D+00-0.257D-01-0.550D+00 0.344D+00-0.733D-01
 Coeff-Com: -0.219D+00-0.255D+01 0.282D+01-0.184D+00 0.107D+01
 Coeff:      0.233D+00 0.144D+00-0.257D-01-0.550D+00 0.344D+00-0.733D-01
 Coeff:     -0.219D+00-0.255D+01 0.282D+01-0.184D+00 0.107D+01
 Gap=     0.157 Goal=   None    Shift=    0.000
 Gap=     0.268 Goal=   None    Shift=    0.000
 RMSDP=1.87D-05 MaxDP=2.04D-03 DE=-2.28D-06 OVMax= 1.87D-03

 Cycle  54  Pass 1  IDiag  1:
 RMSU=  7.01D-06    CP:  1.00D+00  3.00D+00 -3.00D+00 -3.00D+00  3.00D+00
                    CP:  3.00D+00  3.00D+00  1.40D+00  3.00D+00  3.00D+00
                    CP:  3.00D+00  2.31D+00  9.14D-01
 E= -732.296026198477     Delta-E=       -0.000000370896 Rises=F Damp=F
 DIIS: error= 1.11D-05 at cycle  54 NSaved=  12.
 NSaved=12 IEnMin=12 EnMin= -732.296026198477     IErMin=12 ErrMin= 1.11D-05
 ErrMax= 1.11D-05  0.00D+00 EMaxC= 1.00D+00 BMatC= 7.31D-08 BMatP= 1.27D-07
 IDIUse=1 WtCom= 1.00D+00 WtEn= 0.00D+00
 Coeff-Com: -0.224D+00-0.302D+01 0.263D+01 0.256D+00 0.168D+00 0.246D+00
 Coeff-Com:  0.924D+00-0.626D+00-0.748D+00-0.590D+00-0.411D-01 0.203D+01
 Coeff:     -0.224D+00-0.302D+01 0.263D+01 0.256D+00 0.168D+00 0.246D+00
 Coeff:      0.924D+00-0.626D+00-0.748D+00-0.590D+00-0.411D-01 0.203D+01
 Gap=     0.157 Goal=   None    Shift=    0.000
 Gap=     0.268 Goal=   None    Shift=    0.000
 RMSDP=1.42D-04 MaxDP=1.93D-02 DE=-3.71D-07 OVMax= 2.77D-02

 Cycle  55  Pass 1  IDiag  1:
 RMSU=  8.43D-05    CP:  1.00D+00  3.00D+00 -3.00D+00 -3.00D+00  3.00D+00
                    CP:  3.00D+00  3.00D+00  8.59D-02  3.00D+00  3.00D+00
                    CP:  3.00D+00  3.00D+00  2.95D+00  1.22D+00
 E= -732.296028876499     Delta-E=       -0.000002678022 Rises=F Damp=F
 DIIS: error= 1.75D-05 at cycle  55 NSaved=  13.
 NSaved=13 IEnMin=13 EnMin= -732.296028876499     IErMin=12 ErrMin= 1.11D-05
 ErrMax= 1.75D-05  0.00D+00 EMaxC= 1.00D+00 BMatC= 1.50D-07 BMatP= 7.31D-08
 IDIUse=1 WtCom= 1.00D+00 WtEn= 0.00D+00
 Coeff-Com: -0.197D+00-0.167D+00 0.485D+00-0.193D+00-0.215D-01 0.413D-01
 Coeff-Com:  0.226D+00-0.112D+01 0.846D+00-0.137D+00-0.690D+00 0.124D+01
 Coeff-Com:  0.686D+00
 Coeff:     -0.197D+00-0.167D+00 0.485D+00-0.193D+00-0.215D-01 0.413D-01
 Coeff:      0.226D+00-0.112D+01 0.846D+00-0.137D+00-0.690D+00 0.124D+01
 Coeff:      0.686D+00
 Gap=     0.157 Goal=   None    Shift=    0.000
 Gap=     0.268 Goal=   None    Shift=    0.000
 RMSDP=1.39D-05 MaxDP=1.86D-03 DE=-2.68D-06 OVMax= 2.39D-03

 Cycle  56  Pass 1  IDiag  1:
 RMSU=  2.02D-06    CP:  1.00D+00  3.00D+00 -3.00D+00 -3.00D+00  3.00D+00
                    CP:  3.00D+00  3.00D+00 -2.73D-01  3.00D+00  3.00D+00
                    CP:  3.00D+00  3.00D+00  3.00D+00  1.73D+00  1.14D+00
 E= -732.296029013608     Delta-E=       -0.000000137109 Rises=F Damp=F
 DIIS: error= 1.10D-05 at cycle  56 NSaved=  14.
 NSaved=14 IEnMin=14 EnMin= -732.296029013608     IErMin=14 ErrMin= 1.10D-05
 ErrMax= 1.10D-05  0.00D+00 EMaxC= 1.00D+00 BMatC= 6.64D-08 BMatP= 7.31D-08
 IDIUse=1 WtCom= 1.00D+00 WtEn= 0.00D+00
 Coeff-Com: -0.487D-01 0.115D+01-0.585D+00-0.479D+00-0.948D-01-0.742D-01
 Coeff-Com: -0.109D+00-0.908D+00 0.129D+01 0.939D-01-0.573D+00 0.276D+00
 Coeff-Com:  0.985D-01 0.969D+00
 Coeff:     -0.487D-01 0.115D+01-0.585D+00-0.479D+00-0.948D-01-0.742D-01
 Coeff:     -0.109D+00-0.908D+00 0.129D+01 0.939D-01-0.573D+00 0.276D+00
 Coeff:      0.985D-01 0.969D+00
 Gap=     0.157 Goal=   None    Shift=    0.000
 Gap=     0.268 Goal=   None    Shift=    0.000
 RMSDP=7.53D-06 MaxDP=9.23D-04 DE=-1.37D-07 OVMax= 1.30D-03

 Cycle  57  Pass 1  IDiag  1:
 RMSU=  1.56D-06    CP:  1.00D+00  3.00D+00 -3.00D+00 -3.00D+00  3.00D+00
                    CP:  3.00D+00  3.00D+00 -4.56D-01  3.00D+00  3.00D+00
                    CP:  3.00D+00  3.00D+00  3.00D+00  1.92D+00  1.22D+00
                    CP:  2.11D+00
 E= -732.296029088792     Delta-E=       -0.000000075184 Rises=F Damp=F
 DIIS: error= 1.04D-05 at cycle  57 NSaved=  15.
 NSaved=15 IEnMin=15 EnMin= -732.296029088792     IErMin=15 ErrMin= 1.04D-05
 ErrMax= 1.04D-05  0.00D+00 EMaxC= 1.00D+00 BMatC= 4.84D-08 BMatP= 6.64D-08
 IDIUse=1 WtCom= 1.00D+00 WtEn= 0.00D+00
 Coeff-Com:  0.811D-02 0.537D+00-0.264D+00-0.265D+00-0.681D-01-0.380D-01
 Coeff-Com:  0.106D-01-0.354D+00 0.516D+00-0.275D-01-0.263D+00 0.221D+00
 Coeff-Com: -0.252D+00 0.199D+00 0.104D+01
 Coeff:      0.811D-02 0.537D+00-0.264D+00-0.265D+00-0.681D-01-0.380D-01
 Coeff:      0.106D-01-0.354D+00 0.516D+00-0.275D-01-0.263D+00 0.221D+00
 Coeff:     -0.252D+00 0.199D+00 0.104D+01
 Gap=     0.157 Goal=   None    Shift=    0.000
 Gap=     0.268 Goal=   None    Shift=    0.000
 RMSDP=5.23D-06 MaxDP=6.05D-04 DE=-7.52D-08 OVMax= 3.86D-04

 Cycle  58  Pass 1  IDiag  1:
 RMSU=  1.49D-06    CP:  1.00D+00  3.00D+00 -3.00D+00 -3.00D+00  3.00D+00
                    CP:  3.00D+00  3.00D+00 -7.10D-01  3.00D+00  3.00D+00
                    CP:  3.00D+00  3.00D+00  3.00D+00  2.23D+00  1.25D+00
                    CP:  2.43D+00  6.41D-01
 E= -732.296029134151     Delta-E=       -0.000000045359 Rises=F Damp=F
 DIIS: error= 1.05D-05 at cycle  58 NSaved=  16.
 NSaved=16 IEnMin=16 EnMin= -732.296029134151     IErMin=15 ErrMin= 1.04D-05
 ErrMax= 1.05D-05  0.00D+00 EMaxC= 1.00D+00 BMatC= 2.23D-08 BMatP= 4.84D-08
 IDIUse=1 WtCom= 1.00D+00 WtEn= 0.00D+00
 Coeff-Com: -0.125D-01-0.524D+00 0.460D+00 0.146D-02 0.163D-01 0.525D-01
 Coeff-Com:  0.206D+00-0.513D-01-0.192D+00-0.128D+00-0.978D-02 0.318D+00
 Coeff-Com: -0.155D+00-0.213D+00 0.151D+00 0.108D+01
 Coeff:     -0.125D-01-0.524D+00 0.460D+00 0.146D-02 0.163D-01 0.525D-01
 Coeff:      0.206D+00-0.513D-01-0.192D+00-0.128D+00-0.978D-02 0.318D+00
 Coeff:     -0.155D+00-0.213D+00 0.151D+00 0.108D+01
 Gap=     0.157 Goal=   None    Shift=    0.000
 Gap=     0.268 Goal=   None    Shift=    0.000
 RMSDP=4.56D-06 MaxDP=4.45D-04 DE=-4.54D-08 OVMax= 5.89D-04

 Cycle  59  Pass 1  IDiag  1:
 RMSU=  4.50D-07    CP:  1.00D+00  3.00D+00 -3.00D+00 -3.00D+00  3.00D+00
                    CP:  3.00D+00  3.00D+00 -8.91D-01  3.00D+00  3.00D+00
                    CP:  3.00D+00  3.00D+00  3.00D+00  2.39D+00  1.29D+00
                    CP:  3.00D+00  1.12D+00  1.46D+00
 E= -732.296029184236     Delta-E=       -0.000000050085 Rises=F Damp=F
 DIIS: error= 1.06D-05 at cycle  59 NSaved=  17.
 NSaved=17 IEnMin=17 EnMin= -732.296029184236     IErMin=15 ErrMin= 1.04D-05
 ErrMax= 1.06D-05  0.00D+00 EMaxC= 1.00D+00 BMatC= 1.57D-08 BMatP= 2.23D-08
 IDIUse=1 WtCom= 1.00D+00 WtEn= 0.00D+00
 Coeff-Com: -0.550D-01-0.119D+01 0.927D+00 0.110D+00 0.137D+00 0.146D+00
 Coeff-Com:  0.263D+00-0.158D+00-0.264D+00-0.600D-01 0.112D+00 0.901D-01
 Coeff-Com:  0.710D-01 0.148D+00-0.879D+00-0.126D+00 0.172D+01
 Coeff:     -0.550D-01-0.119D+01 0.927D+00 0.110D+00 0.137D+00 0.146D+00
 Coeff:      0.263D+00-0.158D+00-0.264D+00-0.600D-01 0.112D+00 0.901D-01
 Coeff:      0.710D-01 0.148D+00-0.879D+00-0.126D+00 0.172D+01
 Gap=     0.157 Goal=   None    Shift=    0.000
 Gap=     0.268 Goal=   None    Shift=    0.000
 RMSDP=4.86D-06 MaxDP=5.69D-04 DE=-5.01D-08 OVMax= 3.95D-04

 Cycle  60  Pass 1  IDiag  1:
 RMSU=  1.12D-06    CP:  1.00D+00  3.00D+00 -3.00D+00 -3.00D+00  3.00D+00
                    CP:  3.00D+00  3.00D+00 -1.11D+00  3.00D+00  3.00D+00
                    CP:  3.00D+00  3.00D+00  3.00D+00  2.62D+00  1.32D+00
                    CP:  3.00D+00  1.02D+00  2.68D+00  2.42D+00
 E= -732.296029248694     Delta-E=       -0.000000064458 Rises=F Damp=F
 DIIS: error= 1.06D-05 at cycle  60 NSaved=  18.
 NSaved=18 IEnMin=18 EnMin= -732.296029248694     IErMin=15 ErrMin= 1.04D-05
 ErrMax= 1.06D-05  0.00D+00 EMaxC= 1.00D+00 BMatC= 1.11D-08 BMatP= 1.57D-08
 IDIUse=1 WtCom= 1.00D+00 WtEn= 0.00D+00
 Coeff-Com: -0.817D-01-0.269D+01 0.188D+01 0.357D+00 0.501D+00 0.366D+00
 Coeff-Com:  0.196D+00-0.505D+00-0.107D+00 0.284D+00 0.622D+00-0.116D+01
 Coeff-Com:  0.239D+00 0.164D+01-0.960D+00-0.541D+01 0.155D+01 0.428D+01
 Coeff:     -0.817D-01-0.269D+01 0.188D+01 0.357D+00 0.501D+00 0.366D+00
 Coeff:      0.196D+00-0.505D+00-0.107D+00 0.284D+00 0.622D+00-0.116D+01
 Coeff:      0.239D+00 0.164D+01-0.960D+00-0.541D+01 0.155D+01 0.428D+01
 Gap=     0.157 Goal=   None    Shift=    0.000
 Gap=     0.268 Goal=   None    Shift=    0.000
 RMSDP=2.26D-05 MaxDP=2.55D-03 DE=-6.45D-08 OVMax= 2.13D-03

 Cycle  61  Pass 1  IDiag  1:
 Restarting incremental Fock formation.
 E= -732.296029583081     Delta-E=       -0.000000334388 Rises=F Damp=F
 DIIS: error= 1.07D-05 at cycle  61 NSaved=  19.
 NSaved=19 IEnMin=19 EnMin= -732.296029583081     IErMin=15 ErrMin= 1.04D-05
 ErrMax= 1.07D-05  0.00D+00 EMaxC= 1.00D+00 BMatC= 5.34D-08 BMatP= 1.11D-08
 IDIUse=1 WtCom= 1.00D+00 WtEn= 0.00D+00
 Coeff-Com:  0.348D-01-0.316D+01 0.210D+01 0.572D+00 0.457D+00 0.336D+00
 Coeff-Com:  0.308D+00 0.262D+00-0.102D+01 0.123D+00 0.933D+00-0.118D+01
 Coeff-Com: -0.444D+00 0.131D+01 0.241D+01-0.380D+01-0.196D+01 0.209D+01
 Coeff-Com:  0.164D+01
 Coeff:      0.348D-01-0.316D+01 0.210D+01 0.572D+00 0.457D+00 0.336D+00
 Coeff:      0.308D+00 0.262D+00-0.102D+01 0.123D+00 0.933D+00-0.118D+01
 Coeff:     -0.444D+00 0.131D+01 0.241D+01-0.380D+01-0.196D+01 0.209D+01
 Coeff:      0.164D+01
 Gap=     0.157 Goal=   None    Shift=    0.000
 Gap=     0.268 Goal=   None    Shift=    0.000
 RMSDP=1.63D-05 MaxDP=1.61D-03 DE=-3.34D-07 OVMax= 1.98D-03

 Cycle  62  Pass 1  IDiag  1:
 RMSU=  1.60D-05    CP:  1.00D+00
 E= -732.296029911281     Delta-E=       -0.000000328200 Rises=F Damp=F
 DIIS: error= 1.10D-05 at cycle  62 NSaved=  20.
 NSaved=20 IEnMin=20 EnMin= -732.296029911281     IErMin=15 ErrMin= 1.04D-05
 ErrMax= 1.10D-05  0.00D+00 EMaxC= 1.00D+00 BMatC= 6.75D-08 BMatP= 1.11D-08
 IDIUse=1 WtCom= 1.00D+00 WtEn= 0.00D+00
 Coeff-Com:  0.495D-01-0.288D+01 0.191D+01 0.558D+00 0.344D+00 0.267D+00
 Coeff-Com:  0.411D+00 0.625D+00-0.141D+01-0.769D-01 0.813D+00-0.698D+00
 Coeff-Com: -0.484D+00 0.692D+00 0.250D+01-0.148D+01-0.178D+01 0.356D-01
 Coeff-Com: -0.494D+00 0.210D+01
 Coeff:      0.495D-01-0.288D+01 0.191D+01 0.558D+00 0.344D+00 0.267D+00
 Coeff:      0.411D+00 0.625D+00-0.141D+01-0.769D-01 0.813D+00-0.698D+00
 Coeff:     -0.484D+00 0.692D+00 0.250D+01-0.148D+01-0.178D+01 0.356D-01
 Coeff:     -0.494D+00 0.210D+01
 Gap=     0.157 Goal=   None    Shift=    0.000
 Gap=     0.268 Goal=   None    Shift=    0.000
 RMSDP=2.37D-05 MaxDP=2.04D-03 DE=-3.28D-07 OVMax= 3.09D-03

 Cycle  63  Pass 1  IDiag  1:
 RMSU=  3.76D-06    CP:  1.00D+00  2.44D+00
 E= -732.296030430659     Delta-E=       -0.000000519378 Rises=F Damp=F
 DIIS: error= 1.03D-05 at cycle  63 NSaved=  20.
 NSaved=20 IEnMin=20 EnMin= -732.296030430659     IErMin=20 ErrMin= 1.03D-05
 ErrMax= 1.03D-05  0.00D+00 EMaxC= 1.00D+00 BMatC= 4.16D-08 BMatP= 1.11D-08
 IDIUse=1 WtCom= 1.00D+00 WtEn= 0.00D+00
 Coeff-Com: -0.649D-01-0.951D+00 0.548D+00 0.473D+00 0.264D+00-0.160D+00
 Coeff-Com: -0.747D+00 0.767D+00 0.426D+00 0.475D+00-0.169D+01 0.626D+00
 Coeff-Com:  0.146D+01-0.378D+01-0.602D+01 0.496D+01 0.561D+01-0.528D+01
 Coeff-Com: -0.428D+00 0.452D+01
 Coeff:     -0.649D-01-0.951D+00 0.548D+00 0.473D+00 0.264D+00-0.160D+00
 Coeff:     -0.747D+00 0.767D+00 0.426D+00 0.475D+00-0.169D+01 0.626D+00
 Coeff:      0.146D+01-0.378D+01-0.602D+01 0.496D+01 0.561D+01-0.528D+01
 Coeff:     -0.428D+00 0.452D+01
 Gap=     0.157 Goal=   None    Shift=    0.000
 Gap=     0.268 Goal=   None    Shift=    0.000
 RMSDP=1.30D-04 MaxDP=1.24D-02 DE=-5.19D-07 OVMax= 1.62D-02

 Cycle  64  Pass 1  IDiag  1:
 RMSU=  1.19D-04    CP:  9.99D-01  3.00D+00  2.29D+00
 E= -732.296032820810     Delta-E=       -0.000002390150 Rises=F Damp=F
 DIIS: error= 1.51D-05 at cycle  64 NSaved=  20.
 NSaved=20 IEnMin=20 EnMin= -732.296032820810     IErMin=19 ErrMin= 1.03D-05
 ErrMax= 1.51D-05  0.00D+00 EMaxC= 1.00D+00 BMatC= 9.48D-08 BMatP= 1.11D-08
 IDIUse=1 WtCom= 1.00D+00 WtEn= 0.00D+00
 Coeff-Com:  0.149D+00 0.424D+00-0.519D+00-0.559D-01-0.869D-01 0.568D+00
 Coeff-Com: -0.384D+00-0.665D-01 0.416D+00-0.584D+00-0.458D+00-0.480D+00
 Coeff-Com:  0.620D+00 0.368D+00 0.190D+00 0.734D+00-0.331D+01-0.204D+00
 Coeff-Com:  0.337D+01 0.301D+00
 Coeff:      0.149D+00 0.424D+00-0.519D+00-0.559D-01-0.869D-01 0.568D+00
 Coeff:     -0.384D+00-0.665D-01 0.416D+00-0.584D+00-0.458D+00-0.480D+00
 Coeff:      0.620D+00 0.368D+00 0.190D+00 0.734D+00-0.331D+01-0.204D+00
 Coeff:      0.337D+01 0.301D+00
 Gap=     0.157 Goal=   None    Shift=    0.000
 Gap=     0.268 Goal=   None    Shift=    0.000
 RMSDP=6.46D-06 MaxDP=1.07D-03 DE=-2.39D-06 OVMax= 8.21D-04

 Cycle  65  Pass 1  IDiag  1:
 RMSU=  4.40D-06    CP:  9.99D-01  3.00D+00  3.00D+00  1.02D+00
 E= -732.296032933608     Delta-E=       -0.000000112798 Rises=F Damp=F
 DIIS: error= 8.86D-06 at cycle  65 NSaved=  20.
 NSaved=20 IEnMin=20 EnMin= -732.296032933608     IErMin=20 ErrMin= 8.86D-06
 ErrMax= 8.86D-06  0.00D+00 EMaxC= 1.00D+00 BMatC= 3.10D-08 BMatP= 1.11D-08
 IDIUse=1 WtCom= 1.00D+00 WtEn= 0.00D+00
 Coeff-Com:  0.202D+00-0.260D+00-0.124D-01-0.601D-01 0.756D+00-0.354D+00
 Coeff-Com:  0.219D+00 0.236D+00-0.136D+01-0.437D+00 0.263D+01 0.611D+01
 Coeff-Com: -0.655D+01-0.909D+01 0.416D+01 0.783D+01-0.198D+01-0.290D+01
 Coeff-Com: -0.387D+01 0.574D+01
 Coeff:      0.202D+00-0.260D+00-0.124D-01-0.601D-01 0.756D+00-0.354D+00
 Coeff:      0.219D+00 0.236D+00-0.136D+01-0.437D+00 0.263D+01 0.611D+01
 Coeff:     -0.655D+01-0.909D+01 0.416D+01 0.783D+01-0.198D+01-0.290D+01
 Coeff:     -0.387D+01 0.574D+01
 Gap=     0.157 Goal=   None    Shift=    0.000
 Gap=     0.268 Goal=   None    Shift=    0.000
 RMSDP=9.49D-05 MaxDP=9.00D-03 DE=-1.13D-07 OVMax= 1.20D-02

 Cycle  66  Pass 1  IDiag  1:
 RMSU=  1.00D-05    CP:  9.99D-01  3.00D+00  3.00D+00  1.80D+00  2.21D+00
 E= -732.296034458657     Delta-E=       -0.000001525049 Rises=F Damp=F
 DIIS: error= 7.52D-06 at cycle  66 NSaved=  20.
 NSaved=20 IEnMin=20 EnMin= -732.296034458657     IErMin=20 ErrMin= 7.52D-06
 ErrMax= 7.52D-06  0.00D+00 EMaxC= 1.00D+00 BMatC= 9.90D-09 BMatP= 1.11D-08
 IDIUse=1 WtCom= 1.00D+00 WtEn= 0.00D+00
 Coeff-Com: -0.202D-01-0.112D+00-0.519D-01 0.862D-03 0.407D+00 0.187D+00
 Coeff-Com: -0.328D+00-0.531D+00 0.756D+00 0.107D+01-0.800D+00-0.458D+01
 Coeff-Com: -0.241D+01 0.322D+01 0.229D+01 0.139D+01-0.136D+01-0.650D+01
 Coeff-Com:  0.600D+01 0.237D+01
 Coeff:     -0.202D-01-0.112D+00-0.519D-01 0.862D-03 0.407D+00 0.187D+00
 Coeff:     -0.328D+00-0.531D+00 0.756D+00 0.107D+01-0.800D+00-0.458D+01
 Coeff:     -0.241D+01 0.322D+01 0.229D+01 0.139D+01-0.136D+01-0.650D+01
 Coeff:      0.600D+01 0.237D+01
 Gap=     0.157 Goal=   None    Shift=    0.000
 Gap=     0.268 Goal=   None    Shift=    0.000
 RMSDP=3.48D-04 MaxDP=3.23D-02 DE=-1.53D-06 OVMax= 4.47D-02

 Cycle  67  Pass 1  IDiag  1:
 RMSU=  2.01D-04    CP:  9.98D-01  3.00D+00  3.00D+00  3.00D+00  3.00D+00
                    CP:  3.00D+00
 E= -732.296037792144     Delta-E=       -0.000003333488 Rises=F Damp=F
 DIIS: error= 3.20D-05 at cycle  67 NSaved=  20.
 NSaved=20 IEnMin=20 EnMin= -732.296037792144     IErMin=19 ErrMin= 7.52D-06
 ErrMax= 3.20D-05  0.00D+00 EMaxC= 1.00D+00 BMatC= 5.81D-07 BMatP= 9.90D-09
 IDIUse=1 WtCom= 1.00D+00 WtEn= 0.00D+00
 Coeff-Com: -0.143D+00-0.860D-01 0.541D-01 0.433D+00 0.242D+00-0.396D+00
 Coeff-Com: -0.646D+00 0.782D+00 0.216D+01 0.182D+01-0.763D+01-0.673D+01
 Coeff-Com:  0.573D+01 0.824D+01-0.263D+01-0.348D+01-0.667D+01 0.794D+01
 Coeff-Com:  0.212D+01-0.104D+00
 Coeff:     -0.143D+00-0.860D-01 0.541D-01 0.433D+00 0.242D+00-0.396D+00
 Coeff:     -0.646D+00 0.782D+00 0.216D+01 0.182D+01-0.763D+01-0.673D+01
 Coeff:      0.573D+01 0.824D+01-0.263D+01-0.348D+01-0.667D+01 0.794D+01
 Coeff:      0.212D+01-0.104D+00
 Gap=     0.157 Goal=   None    Shift=    0.000
 Gap=     0.268 Goal=   None    Shift=    0.000
 RMSDP=4.08D-05 MaxDP=3.53D-03 DE=-3.33D-06 OVMax= 5.69D-03

 Cycle  68  Pass 1  IDiag  1:
 RMSU=  5.00D-06    CP:  9.98D-01  3.00D+00  3.00D+00  3.00D+00  3.00D+00
                    CP:  3.00D+00  1.20D+00
 E= -732.296037914514     Delta-E=       -0.000000122369 Rises=F Damp=F
 DIIS: error= 4.07D-05 at cycle  68 NSaved=  20.
 NSaved=20 IEnMin=20 EnMin= -732.296037914514     IErMin=18 ErrMin= 7.52D-06
 ErrMax= 4.07D-05  0.00D+00 EMaxC= 1.00D+00 BMatC= 9.88D-07 BMatP= 9.90D-09
 IDIUse=1 WtCom= 1.00D+00 WtEn= 0.00D+00
 Coeff-Com: -0.139D+00 0.102D+00 0.256D+00 0.123D+00-0.355D+00-0.407D+00
 Coeff-Com:  0.745D+00 0.160D+01 0.662D+00-0.606D+01-0.484D+01 0.480D+01
 Coeff-Com:  0.601D+01-0.191D+01-0.252D+01-0.608D+01 0.701D+01 0.185D+01
 Coeff-Com:  0.923D+00-0.766D+00
 Coeff:     -0.139D+00 0.102D+00 0.256D+00 0.123D+00-0.355D+00-0.407D+00
 Coeff:      0.745D+00 0.160D+01 0.662D+00-0.606D+01-0.484D+01 0.480D+01
 Coeff:      0.601D+01-0.191D+01-0.252D+01-0.608D+01 0.701D+01 0.185D+01
 Coeff:      0.923D+00-0.766D+00
 Gap=     0.157 Goal=   None    Shift=    0.000
 Gap=     0.268 Goal=   None    Shift=    0.000
 RMSDP=2.66D-05 MaxDP=2.88D-03 DE=-1.22D-07 OVMax= 3.14D-03

 Cycle  69  Pass 1  IDiag  1:
 RMSU=  2.05D-06    CP:  9.98D-01  3.00D+00  3.00D+00  3.00D+00  3.00D+00
                    CP:  3.00D+00  1.33D+00  3.57D-01
 E= -732.296037978361     Delta-E=       -0.000000063848 Rises=F Damp=F
 DIIS: error= 4.12D-05 at cycle  69 NSaved=  20.
 NSaved=20 IEnMin=20 EnMin= -732.296037978361     IErMin=17 ErrMin= 7.52D-06
 ErrMax= 4.12D-05  0.00D+00 EMaxC= 1.00D+00 BMatC= 9.98D-07 BMatP= 9.90D-09
 IDIUse=1 WtCom= 1.00D+00 WtEn= 0.00D+00
 Coeff-Com: -0.246D+00 0.314D+00 0.107D+00-0.202D+00-0.186D+00 0.400D+00
 Coeff-Com:  0.121D+01 0.636D+00-0.356D+01-0.346D+01 0.303D+01 0.350D+01
 Coeff-Com: -0.114D+01-0.948D+00-0.357D+01 0.348D+01 0.976D+00 0.301D+01
 Coeff-Com: -0.438D+01 0.205D+01
 Coeff:     -0.246D+00 0.314D+00 0.107D+00-0.202D+00-0.186D+00 0.400D+00
 Coeff:      0.121D+01 0.636D+00-0.356D+01-0.346D+01 0.303D+01 0.350D+01
 Coeff:     -0.114D+01-0.948D+00-0.357D+01 0.348D+01 0.976D+00 0.301D+01
 Coeff:     -0.438D+01 0.205D+01
 Gap=     0.157 Goal=   None    Shift=    0.000
 Gap=     0.268 Goal=   None    Shift=    0.000
 RMSDP=6.58D-05 MaxDP=5.83D-03 DE=-6.38D-08 OVMax= 9.96D-03

 Cycle  70  Pass 1  IDiag  1:
 RMSU=  9.01D-06    CP:  9.98D-01  3.00D+00  3.00D+00  3.00D+00  3.00D+00
                    CP:  3.00D+00  1.02D+00 -3.00D+00  3.00D+00
 E= -732.296037851257     Delta-E=        0.000000127104 Rises=F Damp=F
 DIIS: error= 1.56D-05 at cycle  70 NSaved=  20.
 NSaved=20 IEnMin=19 EnMin= -732.296037978361     IErMin=16 ErrMin= 7.52D-06
 ErrMax= 1.56D-05  0.00D+00 EMaxC= 1.00D+00 BMatC= 1.20D-07 BMatP= 9.90D-09
 IDIUse=1 WtCom= 1.00D+00 WtEn= 0.00D+00
 Coeff-Com:  0.877D-02-0.525D-01-0.182D+00 0.253D+00 0.259D+00-0.367D+00
 Coeff-Com: -0.614D+00 0.170D+00-0.890D+00 0.657D+00-0.284D+00 0.294D+00
 Coeff-Com:  0.721D+00-0.215D+01 0.119D+01 0.131D+01 0.116D+01-0.991D+00
 Coeff-Com: -0.114D+00 0.632D+00
 Coeff:      0.877D-02-0.525D-01-0.182D+00 0.253D+00 0.259D+00-0.367D+00
 Coeff:     -0.614D+00 0.170D+00-0.890D+00 0.657D+00-0.284D+00 0.294D+00
 Coeff:      0.721D+00-0.215D+01 0.119D+01 0.131D+01 0.116D+01-0.991D+00
 Coeff:     -0.114D+00 0.632D+00
 Gap=     0.157 Goal=   None    Shift=    0.000
 Gap=     0.268 Goal=   None    Shift=    0.000
 RMSDP=6.23D-06 MaxDP=6.22D-04 DE= 1.27D-07 OVMax= 7.38D-04

 Cycle  71  Pass 1  IDiag  1:
 RMSU=  4.19D-06    CP:  9.98D-01  3.00D+00  3.00D+00  3.00D+00  3.00D+00
                    CP:  3.00D+00  1.01D+00 -3.00D+00  3.00D+00  6.75D-01
 E= -732.296037834762     Delta-E=        0.000000016495 Rises=F Damp=F
 DIIS: error= 1.51D-05 at cycle  71 NSaved=  20.
 NSaved=20 IEnMin=18 EnMin= -732.296037978361     IErMin=15 ErrMin= 7.52D-06
 ErrMax= 1.51D-05  0.00D+00 EMaxC= 1.00D+00 BMatC= 1.49D-07 BMatP= 9.90D-09
 IDIUse=1 WtCom= 1.00D+00 WtEn= 0.00D+00
 Coeff-Com: -0.743D-01-0.178D+00 0.302D+00 0.240D+00-0.664D+00-0.107D+01
 Coeff-Com:  0.951D+00-0.702D-02 0.108D+00-0.162D+01 0.958D+00 0.129D+01
 Coeff-Com: -0.200D+01 0.622D+00 0.142D+01 0.115D+01-0.693D+00-0.397D+00
 Coeff-Com:  0.103D+01-0.368D+00
 Coeff:     -0.743D-01-0.178D+00 0.302D+00 0.240D+00-0.664D+00-0.107D+01
 Coeff:      0.951D+00-0.702D-02 0.108D+00-0.162D+01 0.958D+00 0.129D+01
 Coeff:     -0.200D+01 0.622D+00 0.142D+01 0.115D+01-0.693D+00-0.397D+00
 Coeff:      0.103D+01-0.368D+00
 Gap=     0.157 Goal=   None    Shift=    0.000
 Gap=     0.268 Goal=   None    Shift=    0.000
 RMSDP=5.28D-06 MaxDP=4.62D-04 DE= 1.65D-08 OVMax= 6.28D-04

 Cycle  72  Pass 1  IDiag  1:
 RMSU=  8.20D-07    CP:  9.98D-01  3.00D+00  3.00D+00  3.00D+00  3.00D+00
                    CP:  3.00D+00  1.03D+00 -3.00D+00  3.00D+00  4.74D-01
                    CP:  1.28D+00
 E= -732.296037849426     Delta-E=       -0.000000014664 Rises=F Damp=F
 DIIS: error= 1.56D-05 at cycle  72 NSaved=  20.
 NSaved=20 IEnMin=17 EnMin= -732.296037978361     IErMin=14 ErrMin= 7.52D-06
 ErrMax= 1.56D-05  0.00D+00 EMaxC= 1.00D+00 BMatC= 1.60D-07 BMatP= 9.90D-09
 IDIUse=1 WtCom= 1.00D+00 WtEn= 0.00D+00
 Large coefficients: NSaved= 20 BigCof=   10.36 CofMax=   10.00 Det=-5.08D-12
 Inversion failed.  Reducing to 19 matrices.
 Coeff-Com:  0.106D-01 0.242D+00-0.970D+00-0.209D+01 0.138D+01 0.185D+01
 Coeff-Com:  0.973D-01-0.404D+01 0.181D+01 0.252D+01-0.138D+01-0.911D+00
 Coeff-Com:  0.172D+01 0.163D+00 0.562D+00-0.103D+01 0.369D+01-0.925D+01
 Coeff-Com:  0.662D+01
 Coeff:      0.106D-01 0.242D+00-0.970D+00-0.209D+01 0.138D+01 0.185D+01
 Coeff:      0.973D-01-0.404D+01 0.181D+01 0.252D+01-0.138D+01-0.911D+00
 Coeff:      0.172D+01 0.163D+00 0.562D+00-0.103D+01 0.369D+01-0.925D+01
 Coeff:      0.662D+01
 Gap=     0.157 Goal=   None    Shift=    0.000
 Gap=     0.268 Goal=   None    Shift=    0.000
 RMSDP=4.40D-05 MaxDP=4.37D-03 DE=-1.47D-08 OVMax= 5.33D-03

 Cycle  73  Pass 1  IDiag  1:
 RMSU=  6.26D-06    CP:  9.98D-01  3.00D+00  3.00D+00  3.00D+00  3.00D+00
                    CP:  3.00D+00  1.24D+00 -3.00D+00  3.00D+00 -3.31D-02
                    CP:  2.02D+00  3.00D+00
 E= -732.296038004670     Delta-E=       -0.000000155244 Rises=F Damp=F
 DIIS: error= 1.47D-05 at cycle  73 NSaved=  20.
 NSaved=20 IEnMin=20 EnMin= -732.296038004670     IErMin=13 ErrMin= 7.52D-06
 ErrMax= 1.47D-05  0.00D+00 EMaxC= 1.00D+00 BMatC= 1.24D-07 BMatP= 9.90D-09
 IDIUse=1 WtCom= 1.00D+00 WtEn= 0.00D+00
 Coeff-Com:  0.817D-01 0.282D+00-0.139D+01-0.177D+01 0.189D+01 0.153D+01
 Coeff-Com:  0.558D+00-0.346D+01-0.160D+00 0.289D+01 0.546D+00-0.211D+01
 Coeff-Com:  0.161D+01-0.399D+01 0.511D+01-0.277D+01 0.355D+01-0.847D+01
 Coeff-Com:  0.534D+01 0.172D+01
 Coeff:      0.817D-01 0.282D+00-0.139D+01-0.177D+01 0.189D+01 0.153D+01
 Coeff:      0.558D+00-0.346D+01-0.160D+00 0.289D+01 0.546D+00-0.211D+01
 Coeff:      0.161D+01-0.399D+01 0.511D+01-0.277D+01 0.355D+01-0.847D+01
 Coeff:      0.534D+01 0.172D+01
 Gap=     0.157 Goal=   None    Shift=    0.000
 Gap=     0.268 Goal=   None    Shift=    0.000
 RMSDP=3.84D-05 MaxDP=4.69D-03 DE=-1.55D-07 OVMax= 4.59D-03

 Cycle  74  Pass 1  IDiag  1:
 RMSU=  2.62D-06    CP:  9.97D-01  3.00D+00  3.00D+00  3.00D+00  3.00D+00
                    CP:  3.00D+00  1.42D+00 -3.00D+00  3.00D+00  4.87D-01
                    CP:  1.78D+00  3.00D+00  2.02D+00
 E= -732.296038141546     Delta-E=       -0.000000136876 Rises=F Damp=F
 DIIS: error= 7.64D-06 at cycle  74 NSaved=  20.
 NSaved=20 IEnMin=20 EnMin= -732.296038141546     IErMin=12 ErrMin= 7.52D-06
 ErrMax= 7.64D-06  0.00D+00 EMaxC= 1.00D+00 BMatC= 3.55D-08 BMatP= 9.90D-09
 IDIUse=1 WtCom= 1.00D+00 WtEn= 0.00D+00
 Coeff-Com:  0.132D+00-0.450D+00-0.116D+01 0.699D+00 0.892D+00 0.136D+00
 Coeff-Com: -0.141D+01-0.367D-02 0.100D+01 0.948D-01-0.354D-02 0.180D+00
 Coeff-Com:  0.173D+00 0.670D-01-0.195D+00-0.149D+01 0.369D+01-0.294D+01
 Coeff-Com: -0.255D+00 0.183D+01
 Coeff:      0.132D+00-0.450D+00-0.116D+01 0.699D+00 0.892D+00 0.136D+00
 Coeff:     -0.141D+01-0.367D-02 0.100D+01 0.948D-01-0.354D-02 0.180D+00
 Coeff:      0.173D+00 0.670D-01-0.195D+00-0.149D+01 0.369D+01-0.294D+01
 Coeff:     -0.255D+00 0.183D+01
 Gap=     0.157 Goal=   None    Shift=    0.000
 Gap=     0.268 Goal=   None    Shift=    0.000
 RMSDP=6.33D-05 MaxDP=6.05D-03 DE=-1.37D-07 OVMax= 7.96D-03

 Cycle  75  Pass 1  IDiag  1:
 RMSU=  2.36D-06    CP:  9.97D-01  3.00D+00  3.00D+00  3.00D+00  3.00D+00
                    CP:  3.00D+00  1.73D+00 -3.00D+00  3.00D+00 -1.04D-01
                    CP:  3.00D+00  3.00D+00  3.00D+00  1.38D+00
 E= -732.296038210202     Delta-E=       -0.000000068656 Rises=F Damp=F
 DIIS: error= 1.15D-05 at cycle  75 NSaved=  20.
 NSaved=20 IEnMin=20 EnMin= -732.296038210202     IErMin=11 ErrMin= 7.52D-06
 ErrMax= 1.15D-05  0.00D+00 EMaxC= 1.00D+00 BMatC= 7.35D-08 BMatP= 9.90D-09
 IDIUse=1 WtCom= 1.00D+00 WtEn= 0.00D+00
 Coeff-Com:  0.733D+00 0.762D+00-0.110D+01-0.142D+01 0.622D+00 0.241D+01
 Coeff-Com: -0.122D+01-0.119D+01 0.647D-01 0.769D+00-0.547D+00 0.164D+01
 Coeff-Com: -0.227D+01 0.968D+00-0.112D+01 0.383D+01-0.302D+01-0.949D+00
 Coeff-Com:  0.930D+00 0.111D+01
 Coeff:      0.733D+00 0.762D+00-0.110D+01-0.142D+01 0.622D+00 0.241D+01
 Coeff:     -0.122D+01-0.119D+01 0.647D-01 0.769D+00-0.547D+00 0.164D+01
 Coeff:     -0.227D+01 0.968D+00-0.112D+01 0.383D+01-0.302D+01-0.949D+00
 Coeff:      0.930D+00 0.111D+01
 Gap=     0.157 Goal=   None    Shift=    0.000
 Gap=     0.268 Goal=   None    Shift=    0.000
 RMSDP=1.75D-05 MaxDP=2.97D-03 DE=-6.87D-08 OVMax= 1.22D-03

 Cycle  76  Pass 1  IDiag  1:
 RMSU=  5.39D-06    CP:  9.97D-01  3.00D+00  3.00D+00  3.00D+00  3.00D+00
                    CP:  3.00D+00  1.78D+00 -3.00D+00  3.00D+00  1.06D+00
                    CP:  2.63D+00  3.00D+00  3.00D+00  2.45D+00  3.00D+00
 E= -732.296038247161     Delta-E=       -0.000000036959 Rises=F Damp=F
 DIIS: error= 4.65D-06 at cycle  76 NSaved=  20.
 NSaved=20 IEnMin=20 EnMin= -732.296038247161     IErMin=20 ErrMin= 4.65D-06
 ErrMax= 4.65D-06  0.00D+00 EMaxC= 1.00D+00 BMatC= 9.01D-09 BMatP= 9.90D-09
 IDIUse=1 WtCom= 1.00D+00 WtEn= 0.00D+00
 Coeff-Com: -0.767D-01 0.246D+00-0.196D+00-0.209D+00 0.306D-01 0.333D+00
 Coeff-Com: -0.171D+00-0.272D+00 0.924D-01 0.203D+00 0.383D+00 0.113D+00
 Coeff-Com: -0.385D+00 0.124D+00-0.528D+00 0.443D+00-0.294D+00 0.172D+00
 Coeff-Com:  0.354D+00 0.638D+00
 Coeff:     -0.767D-01 0.246D+00-0.196D+00-0.209D+00 0.306D-01 0.333D+00
 Coeff:     -0.171D+00-0.272D+00 0.924D-01 0.203D+00 0.383D+00 0.113D+00
 Coeff:     -0.385D+00 0.124D+00-0.528D+00 0.443D+00-0.294D+00 0.172D+00
 Coeff:      0.354D+00 0.638D+00
 Gap=     0.157 Goal=   None    Shift=    0.000
 Gap=     0.268 Goal=   None    Shift=    0.000
 RMSDP=1.50D-05 MaxDP=1.38D-03 DE=-3.70D-08 OVMax= 2.17D-03

 Cycle  77  Pass 1  IDiag  1:
 RMSU=  8.60D-07    CP:  9.97D-01  3.00D+00  3.00D+00  3.00D+00  3.00D+00
                    CP:  3.00D+00  1.84D+00 -3.00D+00  3.00D+00  4.48D-01
                    CP:  2.85D+00  3.00D+00  3.00D+00  2.44D+00  2.58D+00
                    CP:  4.78D-01
 E= -732.296038243419     Delta-E=        0.000000003742 Rises=F Damp=F
 DIIS: error= 5.18D-06 at cycle  77 NSaved=  20.
 NSaved=20 IEnMin=19 EnMin= -732.296038247161     IErMin=19 ErrMin= 4.65D-06
 ErrMax= 5.18D-06  0.00D+00 EMaxC= 1.00D+00 BMatC= 1.68D-08 BMatP= 9.01D-09
 IDIUse=1 WtCom= 1.00D+00 WtEn= 0.00D+00
 Coeff-Com:  0.247D+00-0.114D+00-0.185D+00-0.102D+00 0.170D+00 0.329D-02
 Coeff-Com:  0.105D+00-0.241D+00 0.113D+00-0.992D-01 0.551D+00-0.569D+00
 Coeff-Com:  0.314D+00-0.794D+00 0.712D+00-0.388D-01-0.200D+00-0.134D+00
 Coeff-Com:  0.290D+00 0.974D+00
 Coeff:      0.247D+00-0.114D+00-0.185D+00-0.102D+00 0.170D+00 0.329D-02
 Coeff:      0.105D+00-0.241D+00 0.113D+00-0.992D-01 0.551D+00-0.569D+00
 Coeff:      0.314D+00-0.794D+00 0.712D+00-0.388D-01-0.200D+00-0.134D+00
 Coeff:      0.290D+00 0.974D+00
 Gap=     0.157 Goal=   None    Shift=    0.000
 Gap=     0.268 Goal=   None    Shift=    0.000
 RMSDP=4.78D-06 MaxDP=8.28D-04 DE= 3.74D-09 OVMax= 3.48D-04

 Cycle  78  Pass 1  IDiag  1:
 RMSU=  3.84D-07    CP:  9.97D-01  3.00D+00  3.00D+00  3.00D+00  3.00D+00
                    CP:  3.00D+00  1.86D+00 -3.00D+00  3.00D+00  7.02D-01
                    CP:  2.92D+00  3.00D+00  3.00D+00  2.62D+00  3.00D+00
                    CP:  8.47D-01  1.98D-01
 E= -732.296038247269     Delta-E=       -0.000000003850 Rises=F Damp=F
 DIIS: error= 1.25D-06 at cycle  78 NSaved=  20.
 NSaved=20 IEnMin=20 EnMin= -732.296038247269     IErMin=20 ErrMin= 1.25D-06
 ErrMax= 1.25D-06  0.00D+00 EMaxC= 1.00D+00 BMatC= 1.13D-09 BMatP= 9.01D-09
 IDIUse=1 WtCom= 1.00D+00 WtEn= 0.00D+00
 Coeff-Com: -0.135D+00 0.142D+00 0.179D-01-0.125D+00 0.606D-01-0.177D-02
 Coeff-Com:  0.733D-01 0.147D-01-0.313D+00 0.223D+00 0.555D-01-0.115D+00
 Coeff-Com:  0.322D+00-0.296D+00 0.169D+00 0.998D-01-0.366D+00-0.395D+00
 Coeff-Com: -0.760D+00 0.233D+01
 Coeff:     -0.135D+00 0.142D+00 0.179D-01-0.125D+00 0.606D-01-0.177D-02
 Coeff:      0.733D-01 0.147D-01-0.313D+00 0.223D+00 0.555D-01-0.115D+00
 Coeff:      0.322D+00-0.296D+00 0.169D+00 0.998D-01-0.366D+00-0.395D+00
 Coeff:     -0.760D+00 0.233D+01
 Gap=     0.157 Goal=   None    Shift=    0.000
 Gap=     0.268 Goal=   None    Shift=    0.000
 RMSDP=2.56D-06 MaxDP=4.27D-04 DE=-3.85D-09 OVMax= 4.45D-04

 Cycle  79  Pass 1  IDiag  1:
 RMSU=  2.10D-07    CP:  9.97D-01  3.00D+00  3.00D+00  3.00D+00  3.00D+00
                    CP:  3.00D+00  1.86D+00 -3.00D+00  3.00D+00  9.31D-01
                    CP:  2.72D+00  3.00D+00  3.00D+00  2.97D+00  3.00D+00
                    CP:  8.72D-01  3.29D-01  1.29D+00
 E= -732.296038253292     Delta-E=       -0.000000006023 Rises=F Damp=F
 DIIS: error= 1.06D-06 at cycle  79 NSaved=  20.
 NSaved=20 IEnMin=20 EnMin= -732.296038253292     IErMin=20 ErrMin= 1.06D-06
 ErrMax= 1.06D-06  0.00D+00 EMaxC= 1.00D+00 BMatC= 1.13D-10 BMatP= 1.13D-09
 IDIUse=1 WtCom= 1.00D+00 WtEn= 0.00D+00
 Coeff-Com: -0.821D-01-0.449D-01 0.242D+00-0.100D+00-0.342D+00 0.431D+00
 Coeff-Com: -0.117D+00 0.427D+00-0.111D+01 0.103D+01-0.606D+00 0.155D+01
 Coeff-Com: -0.139D+01-0.298D-01 0.569D+00 0.718D-02-0.561D+00-0.210D+01
 Coeff-Com:  0.140D+01 0.182D+01
 Coeff:     -0.821D-01-0.449D-01 0.242D+00-0.100D+00-0.342D+00 0.431D+00
 Coeff:     -0.117D+00 0.427D+00-0.111D+01 0.103D+01-0.606D+00 0.155D+01
 Coeff:     -0.139D+01-0.298D-01 0.569D+00 0.718D-02-0.561D+00-0.210D+01
 Coeff:      0.140D+01 0.182D+01
 Gap=     0.157 Goal=   None    Shift=    0.000
 Gap=     0.268 Goal=   None    Shift=    0.000
 RMSDP=5.64D-06 MaxDP=8.51D-04 DE=-6.02D-09 OVMax= 1.12D-03

 Cycle  80  Pass 1  IDiag  1:
 RMSU=  1.54D-06    CP:  9.97D-01  3.00D+00  3.00D+00  3.00D+00  3.00D+00
                    CP:  3.00D+00  1.85D+00 -3.00D+00  3.00D+00  1.28D+00
                    CP:  2.16D+00  3.00D+00  3.00D+00  3.00D+00  2.59D+00
                    CP:  6.18D-01  1.36D+00  7.43D-01  3.00D+00
 E= -732.296038263657     Delta-E=       -0.000000010365 Rises=F Damp=F
 DIIS: error= 9.95D-07 at cycle  80 NSaved=  20.
 NSaved=20 IEnMin=20 EnMin= -732.296038263657     IErMin=20 ErrMin= 9.95D-07
 ErrMax= 9.95D-07  0.00D+00 EMaxC= 1.00D+00 BMatC= 4.04D-10 BMatP= 1.13D-10
 IDIUse=1 WtCom= 1.00D+00 WtEn= 0.00D+00
 Coeff-Com: -0.468D-01 0.221D+00-0.156D+00-0.112D+00 0.127D+00-0.891D-01
 Coeff-Com:  0.522D+00-0.645D+00 0.318D+00-0.235D+00 0.669D+00-0.539D+00
 Coeff-Com: -0.191D+00 0.150D+00 0.290D+00-0.385D-01-0.597D-01-0.111D+01
 Coeff-Com:  0.277D+00 0.165D+01
 Coeff:     -0.468D-01 0.221D+00-0.156D+00-0.112D+00 0.127D+00-0.891D-01
 Coeff:      0.522D+00-0.645D+00 0.318D+00-0.235D+00 0.669D+00-0.539D+00
 Coeff:     -0.191D+00 0.150D+00 0.290D+00-0.385D-01-0.597D-01-0.111D+01
 Coeff:      0.277D+00 0.165D+01
 Gap=     0.157 Goal=   None    Shift=    0.000
 Gap=     0.268 Goal=   None    Shift=    0.000
 RMSDP=4.81D-06 MaxDP=7.50D-04 DE=-1.04D-08 OVMax= 9.86D-04

 Cycle  81  Pass 1  IDiag  1:
 Restarting incremental Fock formation.
 E= -732.296038269488     Delta-E=       -0.000000005831 Rises=F Damp=F
 DIIS: error= 3.97D-07 at cycle  81 NSaved=  20.
 NSaved=20 IEnMin=20 EnMin= -732.296038269488     IErMin=20 ErrMin= 3.97D-07
 ErrMax= 3.97D-07  0.00D+00 EMaxC= 1.00D+00 BMatC= 2.45D-11 BMatP= 1.13D-10
 IDIUse=1 WtCom= 1.00D+00 WtEn= 0.00D+00
 Coeff-Com:  0.345D-01-0.302D-01 0.634D-01-0.106D+00 0.254D-01-0.331D-02
 Coeff-Com:  0.226D+00-0.291D+00 0.107D+00-0.251D+00 0.255D+00-0.104D-01
 Coeff-Com: -0.173D+00 0.974D-01 0.169D+00 0.854D+00-0.125D+01-0.631D+00
 Coeff-Com:  0.833D+00 0.108D+01
 Coeff:      0.345D-01-0.302D-01 0.634D-01-0.106D+00 0.254D-01-0.331D-02
 Coeff:      0.226D+00-0.291D+00 0.107D+00-0.251D+00 0.255D+00-0.104D-01
 Coeff:     -0.173D+00 0.974D-01 0.169D+00 0.854D+00-0.125D+01-0.631D+00
 Coeff:      0.833D+00 0.108D+01
 Gap=     0.157 Goal=   None    Shift=    0.000
 Gap=     0.268 Goal=   None    Shift=    0.000
 RMSDP=3.90D-06 MaxDP=6.50D-04 DE=-5.83D-09 OVMax= 8.25D-04

 Cycle  82  Pass 1  IDiag  1:
 RMSU=  3.90D-06    CP:  1.00D+00
 E= -732.296038271681     Delta-E=       -0.000000002193 Rises=F Damp=F
 DIIS: error= 4.66D-07 at cycle  82 NSaved=  20.
 NSaved=20 IEnMin=20 EnMin= -732.296038271681     IErMin=19 ErrMin= 3.97D-07
 ErrMax= 4.66D-07  0.00D+00 EMaxC= 1.00D+00 BMatC= 1.29D-10 BMatP= 2.45D-11
 IDIUse=1 WtCom= 1.00D+00 WtEn= 0.00D+00
 Coeff-Com:  0.986D-02 0.223D-01-0.627D-01 0.282D-01-0.302D-01 0.129D+00
 Coeff-Com: -0.141D+00 0.110D+00-0.277D+00 0.216D+00 0.163D-01-0.707D-01
 Coeff-Com:  0.619D-02 0.124D+00 0.260D+00-0.265D+00-0.266D+00-0.659D-01
 Coeff-Com:  0.390D+00 0.867D+00
 Coeff:      0.986D-02 0.223D-01-0.627D-01 0.282D-01-0.302D-01 0.129D+00
 Coeff:     -0.141D+00 0.110D+00-0.277D+00 0.216D+00 0.163D-01-0.707D-01
 Coeff:      0.619D-02 0.124D+00 0.260D+00-0.265D+00-0.266D+00-0.659D-01
 Coeff:      0.390D+00 0.867D+00
 Gap=     0.157 Goal=   None    Shift=    0.000
 Gap=     0.268 Goal=   None    Shift=    0.000
 RMSDP=1.22D-06 MaxDP=1.63D-04 DE=-2.19D-09 OVMax= 2.21D-04

 Cycle  83  Pass 1  IDiag  1:
 RMSU=  5.57D-07    CP:  1.00D+00  1.28D+00
 E= -732.296038271863     Delta-E=       -0.000000000182 Rises=F Damp=F
 DIIS: error= 2.31D-07 at cycle  83 NSaved=  20.
 NSaved=20 IEnMin=20 EnMin= -732.296038271863     IErMin=20 ErrMin= 2.31D-07
 ErrMax= 2.31D-07  0.00D+00 EMaxC= 1.00D+00 BMatC= 3.12D-11 BMatP= 2.45D-11
 IDIUse=1 WtCom= 1.00D+00 WtEn= 0.00D+00
 Coeff-Com: -0.245D-01 0.372D-01-0.163D-01 0.574D-01-0.131D+00 0.113D+00
 Coeff-Com: -0.556D-01 0.170D+00-0.159D+00-0.221D-01 0.777D-01-0.258D-03
 Coeff-Com: -0.100D-01-0.334D+00 0.352D+00 0.229D+00-0.321D+00-0.279D+00
 Coeff-Com:  0.262D+00 0.105D+01
[truncated: 1,043,775 more chars]
