# Supplementary material for: Characterization of the binding process between gallic acid and trivalent chromium in tannery wastewater: a spectroscopic perspective
Source: Royal Society of Chemistry journal article supplement (doi:10.1039/d4em00621f), 2025-01-01
Supplement: d4em00621f3.log [file d4em00621f3.log]

 Entering Gaussian System, Link 0=g16
 Input=149-91-7-para15-Cr.gjf
 Output=149-91-7-para15-Cr.log
 Initial command:
 /home/xut/apps/g16/l1.exe "/home/xut/apps/g16/scratch/xut/699.master/Gau-70480.inp" -scrdir="/home/xut/apps/g16/scratch/xut/699.master/"
 Entering Link 1 = /home/xut/apps/g16/l1.exe PID=     70481.
  
 Copyright (c) 1988,1990,1992,1993,1995,1998,2003,2009,2016,
            Gaussian, Inc.  All Rights Reserved.
  
 This is part of the Gaussian(R) 16 program.  It is based on
 the Gaussian(R) 09 system (copyright 2009, Gaussian, Inc.),
 the Gaussian(R) 03 system (copyright 2003, Gaussian, Inc.),
 the Gaussian(R) 98 system (copyright 1998, Gaussian, Inc.),
 the Gaussian(R) 94 system (copyright 1995, Gaussian, Inc.),
 the Gaussian 92(TM) system (copyright 1992, Gaussian, Inc.),
 the Gaussian 90(TM) system (copyright 1990, Gaussian, Inc.),
 the Gaussian 88(TM) system (copyright 1988, Gaussian, Inc.),
 the Gaussian 86(TM) system (copyright 1986, Carnegie Mellon
 University), and the Gaussian 82(TM) system (copyright 1983,
 Carnegie Mellon University). Gaussian is a federally registered
 trademark of Gaussian, Inc.
  
 This software contains proprietary and confidential information,
 including trade secrets, belonging to Gaussian, Inc.
  
 This software is provided under written license and may be
 used, copied, transmitted, or stored only in accord with that
 written license.
  
 The following legend is applicable only to US Government
 contracts under FAR:
  
                    RESTRICTED RIGHTS LEGEND
  
 Use, reproduction and disclosure by the US Government is
 subject to restrictions as set forth in subparagraphs (a)
 and (c) of the Commercial Computer Software - Restricted
 Rights clause in FAR 52.227-19.
  
 Gaussian, Inc.
 340 Quinnipiac St., Bldg. 40, Wallingford CT 06492
  
  
 ---------------------------------------------------------------
 Warning -- This program may not be used in any manner that
 competes with the business of Gaussian, Inc. or will provide
 assistance to any competitor of Gaussian, Inc.  The licensee
 of this program is prohibited from giving any competitor of
 Gaussian, Inc. access to this program.  By using this program,
 the user acknowledges that Gaussian, Inc. is engaged in the
 business of creating and licensing software in the field of
 computational chemistry and represents and warrants to the
 licensee that it is not a competitor of Gaussian, Inc. and that
 it will not use this program in any manner prohibited above.
 ---------------------------------------------------------------
  

 Cite this work as:
 Gaussian 16, Revision A.03,
 M. J. Frisch, G. W. Trucks, H. B. Schlegel, G. E. Scuseria, 
 M. A. Robb, J. R. Cheeseman, G. Scalmani, V. Barone, 
 G. A. Petersson, H. Nakatsuji, X. Li, M. Caricato, A. V. Marenich, 
 J. Bloino, B. G. Janesko, R. Gomperts, B. Mennucci, H. P. Hratchian, 
 J. V. Ortiz, A. F. Izmaylov, J. L. Sonnenberg, D. Williams-Young, 
 F. Ding, F. Lipparini, F. Egidi, J. Goings, B. Peng, A. Petrone, 
 T. Henderson, D. Ranasinghe, V. G. Zakrzewski, J. Gao, N. Rega, 
 G. Zheng, W. Liang, M. Hada, M. Ehara, K. Toyota, R. Fukuda, 
 J. Hasegawa, M. Ishida, T. Nakajima, Y. Honda, O. Kitao, H. Nakai, 
 T. Vreven, K. Throssell, J. A. Montgomery, Jr., J. E. Peralta, 
 F. Ogliaro, M. J. Bearpark, J. J. Heyd, E. N. Brothers, K. N. Kudin, 
 V. N. Staroverov, T. A. Keith, R. Kobayashi, J. Normand, 
 K. Raghavachari, A. P. Rendell, J. C. Burant, S. S. Iyengar, 
 J. Tomasi, M. Cossi, J. M. Millam, M. Klene, C. Adamo, R. Cammi, 
 J. W. Ochterski, R. L. Martin, K. Morokuma, O. Farkas, 
 J. B. Foresman, and D. J. Fox, Gaussian, Inc., Wallingford CT, 2016.
 
 ******************************************
 Gaussian 16:  ES64L-G16RevA.03 25-Dec-2016
                31-May-2023 
 ******************************************
 %chk=149-91-7-para15-Cr.chk
 %nprocshared=10
 Will use up to   10 processors via shared memory.
 %mem=20GB
 ----------------------------------------------------------------------
 #p opt m062x/genecp scrf=(smd,solvent=water) iop(7/127=-99) scf=conver
 =5
 ----------------------------------------------------------------------
 1/18=20,19=15,26=3,38=1/1,3;
 2/9=110,12=2,17=6,18=5,40=1/2;
 3/5=7,11=2,16=1,17=8,25=1,30=1,70=32201,71=1,72=1,74=-55/1,2,3;
 4//1;
 5/5=2,6=5,38=5,53=1/2;
 6/7=2,8=2,9=2,10=2,28=1/1;
 7/127=-99/1,2,3,16;
 1/18=20,19=15,26=3/3(2);
 2/9=110/2;
 99//99;
 2/9=110/2;
 3/5=7,6=1,11=2,16=1,17=8,25=1,30=1,70=32205,71=1,72=1,74=-55,82=7/1,2,3;
 4/5=5,16=3,69=1/1;
 5/5=2,6=5,38=5,53=1/2;
 7/127=-99/1,2,3,16;
 1/18=20,19=15,26=3/3(-5);
 2/9=110/2;
 6/7=2,8=2,9=2,10=2,19=2,28=1/1;
 99/9=1/99;
 Leave Link    1 at Wed May 31 22:55:29 2023, MaxMem=  2684354560 cpu:               0.5 elap:               0.1
 (Enter /home/xut/apps/g16/l101.exe)
 -------------------
 Title Card Required
 -------------------
 Symbolic Z-matrix:
 Charge =  3 Multiplicity = 4
 C                    -0.23579   1.40855   0.00751 
 C                    -1.63234   1.20757  -0.00835 
 C                    -2.18506  -0.0858   -0.00336 
 C                    -1.37508  -1.1665    0.01694 
 C                     0.13968  -0.94917   0.03413 
 C                     0.62896   0.35897   0.02821 
 H                    -2.28397   2.05611  -0.02448 
 H                    -1.78445  -2.15509   0.02091 
 C                    -3.71393  -0.26976  -0.02105 
 O                    -4.22539  -1.46633  -0.01644 
 H                    -3.64964  -2.23438  -0.00201 
 O                    -4.46863   0.73703  -0.03996 
 O                     0.95545  -1.96283   0.05388 
 H                     1.90401  -1.81545   0.06454 
 O                     2.03929   0.59484   0.0439 
 H                     2.21995   1.42488   0.4911 
 O                     0.23406   2.62205   0.00221 
 H                    -0.36787   3.36977  -0.01235 
 Cr                    4.08021  -0.3278   -0.05044 
 
 Add virtual bond connecting atoms Cr19       and O15        Dist= 4.24D+00.
 ITRead=  0  0  0  0  0  0  0  0  0  0  0  0  0  0  0  0  0  0  0
 MicOpt= -1 -1 -1 -1 -1 -1 -1 -1 -1 -1 -1 -1 -1 -1 -1 -1 -1 -1 -1
 NAtoms=     19 NQM=       19 NQMF=       0 NMMI=      0 NMMIF=      0
                NMic=       0 NMicF=      0.
                    Isotopes and Nuclear Properties:
 (Nuclear quadrupole moments (NQMom) in fm**2, nuclear magnetic moments (NMagM)
  in nuclear magnetons)

  Atom         1           2           3           4           5           6           7           8           9          10
 IAtWgt=          12          12          12          12          12          12           1           1          12          16
 AtmWgt=  12.0000000  12.0000000  12.0000000  12.0000000  12.0000000  12.0000000   1.0078250   1.0078250  12.0000000  15.9949146
 NucSpn=           0           0           0           0           0           0           1           1           0           0
 AtZEff=  -0.0000000  -0.0000000  -0.0000000  -0.0000000  -0.0000000  -0.0000000  -0.0000000  -0.0000000  -0.0000000  -0.0000000
 NQMom=    0.0000000   0.0000000   0.0000000   0.0000000   0.0000000   0.0000000   0.0000000   0.0000000   0.0000000   0.0000000
 NMagM=    0.0000000   0.0000000   0.0000000   0.0000000   0.0000000   0.0000000   2.7928460   2.7928460   0.0000000   0.0000000
 AtZNuc=   6.0000000   6.0000000   6.0000000   6.0000000   6.0000000   6.0000000   1.0000000   1.0000000   6.0000000   8.0000000

  Atom        11          12          13          14          15          16          17          18          19
 IAtWgt=           1          16          16           1          16           1          16           1          52
 AtmWgt=   1.0078250  15.9949146  15.9949146   1.0078250  15.9949146   1.0078250  15.9949146   1.0078250  51.9405097
 NucSpn=           1           0           0           1           0           1           0           1           0
 AtZEff=  -0.0000000  -0.0000000  -0.0000000  -0.0000000  -0.0000000  -0.0000000  -0.0000000  -0.0000000  -0.0000000
 NQMom=    0.0000000   0.0000000   0.0000000   0.0000000   0.0000000   0.0000000   0.0000000   0.0000000   0.0000000
 NMagM=    2.7928460   0.0000000   0.0000000   2.7928460   0.0000000   2.7928460   0.0000000   2.7928460   0.0000000
 AtZNuc=   1.0000000   8.0000000   8.0000000   1.0000000   8.0000000   1.0000000   8.0000000   1.0000000  24.0000000
 Leave Link  101 at Wed May 31 22:55:30 2023, MaxMem=  2684354560 cpu:               2.9 elap:               0.3
 (Enter /home/xut/apps/g16/l103.exe)

 GradGradGradGradGradGradGradGradGradGradGradGradGradGradGradGradGradGrad
 Berny optimization.
 Initialization pass.
                           ----------------------------
                           !    Initial Parameters    !
                           ! (Angstroms and Degrees)  !
 --------------------------                            --------------------------
 ! Name  Definition              Value          Derivative Info.                !
 --------------------------------------------------------------------------------
 ! R1    R(1,2)                  1.411          estimate D2E/DX2                !
 ! R2    R(1,6)                  1.3601         estimate D2E/DX2                !
 ! R3    R(1,17)                 1.3013         estimate D2E/DX2                !
 ! R4    R(2,3)                  1.4065         estimate D2E/DX2                !
 ! R5    R(2,7)                  1.07           estimate D2E/DX2                !
 ! R6    R(3,4)                  1.3507         estimate D2E/DX2                !
 ! R7    R(3,9)                  1.54           estimate D2E/DX2                !
 ! R8    R(4,5)                  1.5304         estimate D2E/DX2                !
 ! R9    R(4,8)                  1.07           estimate D2E/DX2                !
 ! R10   R(5,6)                  1.3967         estimate D2E/DX2                !
 ! R11   R(5,13)                 1.3013         estimate D2E/DX2                !
 ! R12   R(6,15)                 1.43           estimate D2E/DX2                !
 ! R13   R(9,10)                 1.3013         estimate D2E/DX2                !
 ! R14   R(9,12)                 1.2584         estimate D2E/DX2                !
 ! R15   R(10,11)                0.96           estimate D2E/DX2                !
 ! R16   R(13,14)                0.96           estimate D2E/DX2                !
 ! R17   R(15,16)                0.96           estimate D2E/DX2                !
 ! R18   R(15,19)                2.2418         estimate D2E/DX2                !
 ! R19   R(17,18)                0.96           estimate D2E/DX2                !
 ! A1    A(2,1,6)              121.3012         estimate D2E/DX2                !
 ! A2    A(2,1,17)             119.3494         estimate D2E/DX2                !
 ! A3    A(6,1,17)             119.3494         estimate D2E/DX2                !
 ! A4    A(1,2,3)              121.3234         estimate D2E/DX2                !
 ! A5    A(1,2,7)              119.3383         estimate D2E/DX2                !
 ! A6    A(3,2,7)              119.3383         estimate D2E/DX2                !
 ! A7    A(2,3,4)              120.0093         estimate D2E/DX2                !
 ! A8    A(2,3,9)              119.9954         estimate D2E/DX2                !
 ! A9    A(4,3,9)              119.9953         estimate D2E/DX2                !
 ! A10   A(3,4,5)              118.6915         estimate D2E/DX2                !
 ! A11   A(3,4,8)              120.6543         estimate D2E/DX2                !
 ! A12   A(5,4,8)              120.6542         estimate D2E/DX2                !
 ! A13   A(4,5,6)              118.6667         estimate D2E/DX2                !
 ! A14   A(4,5,13)             120.6666         estimate D2E/DX2                !
 ! A15   A(6,5,13)             120.6666         estimate D2E/DX2                !
 ! A16   A(1,6,5)              120.0078         estimate D2E/DX2                !
 ! A17   A(1,6,15)             119.9961         estimate D2E/DX2                !
 ! A18   A(5,6,15)             119.9961         estimate D2E/DX2                !
 ! A19   A(3,9,10)             120.0            estimate D2E/DX2                !
 ! A20   A(3,9,12)             120.0            estimate D2E/DX2                !
 ! A21   A(10,9,12)            120.0            estimate D2E/DX2                !
 ! A22   A(9,10,11)            120.0            estimate D2E/DX2                !
 ! A23   A(5,13,14)            120.0            estimate D2E/DX2                !
 ! A24   A(6,15,16)            109.4712         estimate D2E/DX2                !
 ! A25   A(6,15,19)            146.0511         estimate D2E/DX2                !
 ! A26   A(16,15,19)           101.7781         estimate D2E/DX2                !
 ! A27   A(1,17,18)            120.0            estimate D2E/DX2                !
 ! D1    D(6,1,2,3)              0.0003         estimate D2E/DX2                !
 ! D2    D(6,1,2,7)           -179.9999         estimate D2E/DX2                !
 ! D3    D(17,1,2,3)          -179.9997         estimate D2E/DX2                !
 ! D4    D(17,1,2,7)             0.0001         estimate D2E/DX2                !
 ! D5    D(2,1,6,5)             -0.0002         estimate D2E/DX2                !
 ! D6    D(2,1,6,15)           179.9998         estimate D2E/DX2                !
 ! D7    D(17,1,6,5)           179.9998         estimate D2E/DX2                !
 ! D8    D(17,1,6,15)           -0.0002         estimate D2E/DX2                !
 ! D9    D(2,1,17,18)            0.0            estimate D2E/DX2                !
 ! D10   D(6,1,17,18)          180.0            estimate D2E/DX2                !
 ! D11   D(1,2,3,4)             -0.0002         estimate D2E/DX2                !
 ! D12   D(1,2,3,9)            179.9999         estimate D2E/DX2                !
 ! D13   D(7,2,3,4)            180.0            estimate D2E/DX2                !
 ! D14   D(7,2,3,9)              0.0001         estimate D2E/DX2                !
 ! D15   D(2,3,4,5)              0.0            estimate D2E/DX2                !
 ! D16   D(2,3,4,8)           -179.9997         estimate D2E/DX2                !
 ! D17   D(9,3,4,5)            179.9999         estimate D2E/DX2                !
 ! D18   D(9,3,4,8)              0.0001         estimate D2E/DX2                !
 ! D19   D(2,3,9,10)           180.0            estimate D2E/DX2                !
 ! D20   D(2,3,9,12)             0.0            estimate D2E/DX2                !
 ! D21   D(4,3,9,10)             0.0001         estimate D2E/DX2                !
 ! D22   D(4,3,9,12)          -179.9998         estimate D2E/DX2                !
 ! D23   D(3,4,5,6)              0.0            estimate D2E/DX2                !
 ! D24   D(3,4,5,13)           180.0            estimate D2E/DX2                !
 ! D25   D(8,4,5,6)            179.9998         estimate D2E/DX2                !
 ! D26   D(8,4,5,13)            -0.0002         estimate D2E/DX2                !
 ! D27   D(4,5,6,1)              0.0001         estimate D2E/DX2                !
 ! D28   D(4,5,6,15)          -179.9999         estimate D2E/DX2                !
 ! D29   D(13,5,6,1)          -179.9999         estimate D2E/DX2                !
 ! D30   D(13,5,6,15)            0.0001         estimate D2E/DX2                !
 ! D31   D(4,5,13,14)          179.9998         estimate D2E/DX2                !
 ! D32   D(6,5,13,14)           -0.0002         estimate D2E/DX2                !
 ! D33   D(1,6,15,16)           30.0            estimate D2E/DX2                !
 ! D34   D(1,6,15,19)         -174.0963         estimate D2E/DX2                !
 ! D35   D(5,6,15,16)         -150.0001         estimate D2E/DX2                !
 ! D36   D(5,6,15,19)            5.9036         estimate D2E/DX2                !
 ! D37   D(3,9,10,11)           -0.0002         estimate D2E/DX2                !
 ! D38   D(12,9,10,11)         179.9998         estimate D2E/DX2                !
 --------------------------------------------------------------------------------
 Trust Radius=3.00D-01 FncErr=1.00D-07 GrdErr=1.00D-06 EigMax=2.50D+02 EigMin=1.00D-04
 Number of steps in this run=     94 maximum allowed number of steps=    114.
 GradGradGradGradGradGradGradGradGradGradGradGradGradGradGradGradGradGrad

 Leave Link  103 at Wed May 31 22:55:30 2023, MaxMem=  2684354560 cpu:               0.1 elap:               0.0
 (Enter /home/xut/apps/g16/l202.exe)
                          Input orientation:                          
 ---------------------------------------------------------------------
 Center     Atomic      Atomic             Coordinates (Angstroms)
 Number     Number       Type             X           Y           Z
 ---------------------------------------------------------------------
      1          6           0       -0.235790    1.408547    0.007505
      2          6           0       -1.632342    1.207568   -0.008347
      3          6           0       -2.185055   -0.085796   -0.003361
      4          6           0       -1.375081   -1.166503    0.016935
      5          6           0        0.139682   -0.949166    0.034131
      6          6           0        0.628959    0.358971    0.028205
      7          1           0       -2.283970    2.056107   -0.024482
      8          1           0       -1.784452   -2.155087    0.020908
      9          6           0       -3.713925   -0.269760   -0.021048
     10          8           0       -4.225387   -1.466325   -0.016437
     11          1           0       -3.649642   -2.234381   -0.002012
     12          8           0       -4.468631    0.737034   -0.039961
     13          8           0        0.955454   -1.962827    0.053879
     14          1           0        1.904014   -1.815446    0.064540
     15          8           0        2.039286    0.594837    0.043903
     16          1           0        2.219954    1.424881    0.491100
     17          8           0        0.234056    2.622054    0.002214
     18          1           0       -0.367866    3.369769   -0.012354
     19         24           0        4.080210   -0.327800   -0.050442
 ---------------------------------------------------------------------
                    Distance matrix (angstroms):
                    1          2          3          4          5
     1  C    0.000000
     2  C    1.411028   0.000000
     3  C    2.456179   1.406523   0.000000
     4  C    2.815840   2.388103   1.350703   0.000000
     5  C    2.387572   2.791662   2.480164   1.530372   0.000000
     6  C    1.360084   2.415561   2.849121   2.518606   1.396657
     7  H    2.148348   1.069999   2.144290   3.348583   3.861242
     8  H    3.885617   3.366221   2.107851   1.069999   2.270839
     9  C    3.861988   2.552577   1.540000   2.505151   3.913429
    10  O    4.917555   3.724735   2.463531   2.866226   4.395889
    11  H    4.992534   3.989555   2.600276   2.512837   4.001507
    12  O    4.286038   2.875228   2.427572   3.632732   4.907679
    13  O    3.575944   4.092916   3.659142   2.463106   1.301300
    14  H    3.869902   4.652928   4.440359   3.343031   1.965765
    15  O    2.416489   3.722771   4.279083   3.841998   2.447966
    16  H    2.502960   3.890611   4.683027   4.456947   3.189428
    17  O    1.301300   2.341863   3.631058   4.116151   3.572609
    18  H    1.965765   2.504801   3.904252   4.646838   4.348904
    19  Cr   4.652539   5.915436   6.270114   5.519797   3.990114
                    6          7          8          9         10
     6  C    0.000000
     7  H    3.371676   0.000000
     8  H    3.484981   4.240959   0.000000
     9  C    4.388436   2.730282   2.697978   0.000000
    10  O    5.186364   4.022026   2.536523   1.301300   0.000000
    11  H    5.003280   4.502649   1.867015   1.965765   0.960000
    12  O    5.112045   2.552046   3.946250   1.258401   2.216870
    13  O    2.344782   5.162542   2.746841   4.967413   5.205053
    14  H    2.520947   5.704039   3.704327   5.827324   6.139870
    15  O    1.430001   4.564047   4.709945   5.818177   6.595313
    16  H    1.970203   4.577074   5.391894   6.192336   7.082308
    17  O    2.297427   2.580981   5.186116   4.893841   6.049944
    18  H    3.171783   2.323211   5.703670   4.943921   6.186137
    19  Cr   3.519797   6.796063   6.143153   7.794407   8.383337
                   11         12         13         14         15
    11  H    0.000000
    12  O    3.082449   0.000000
    13  O    4.613434   6.059600   0.000000
    14  H    5.569832   6.865616   0.960000   0.000000
    15  O    6.353777   6.510011   2.777847   2.414164   0.000000
    16  H    6.934372   6.744800   3.642346   3.283518   0.960000
    17  O    6.218367   5.066591   4.641575   4.741735   2.714812
    18  H    6.494356   4.873226   5.494738   5.661608   3.673934
    19  Cr   7.961659   8.614909   3.528214   2.638587   2.241770
                   16         17         18         19
    16  H    0.000000
    17  O    2.369815   0.000000
    18  H    3.276106   0.960000   0.000000
    19  Cr   2.612606   4.847403   5.784362   0.000000
 Stoichiometry    C7H6CrO5(3+,4)
 Framework group  C1[X(C7H6CrO5)]
 Deg. of freedom    51
 Full point group                 C1      NOp   1
 Largest Abelian subgroup         C1      NOp   1
 Largest concise Abelian subgroup C1      NOp   1
                         Standard orientation:                         
 ---------------------------------------------------------------------
 Center     Atomic      Atomic             Coordinates (Angstroms)
 Number     Number       Type             X           Y           Z
 ---------------------------------------------------------------------
      1          6           0       -0.235790    1.408547    0.007505
      2          6           0       -1.632342    1.207568   -0.008347
      3          6           0       -2.185055   -0.085796   -0.003361
      4          6           0       -1.375081   -1.166503    0.016935
      5          6           0        0.139682   -0.949166    0.034131
      6          6           0        0.628959    0.358971    0.028205
      7          1           0       -2.283970    2.056107   -0.024482
      8          1           0       -1.784452   -2.155087    0.020908
      9          6           0       -3.713925   -0.269760   -0.021048
     10          8           0       -4.225387   -1.466325   -0.016437
     11          1           0       -3.649642   -2.234381   -0.002012
     12          8           0       -4.468631    0.737034   -0.039961
     13          8           0        0.955454   -1.962827    0.053879
     14          1           0        1.904014   -1.815446    0.064540
     15          8           0        2.039286    0.594837    0.043903
     16          1           0        2.219954    1.424881    0.491100
     17          8           0        0.234056    2.622054    0.002214
     18          1           0       -0.367866    3.369769   -0.012354
     19         24           0        4.080210   -0.327800   -0.050442
 ---------------------------------------------------------------------
 Rotational constants (GHZ):           1.5404395           0.2710919           0.2306323
 Leave Link  202 at Wed May 31 22:55:30 2023, MaxMem=  2684354560 cpu:               0.1 elap:               0.0
 (Enter /home/xut/apps/g16/l301.exe)
 General basis read from cards:  (5D, 7F)
 Centers:      19
 LanL2DZ
 ****
 Centers:       1      2      3      4      5      6      9      7      8     11
 Centers:      14     16     18     10     12     13     15     17
 6-311++g(d,p)
 ****
 ======================================================================================================
                                       Pseudopotential Parameters
 ======================================================================================================
  Center     Atomic      Valence      Angular      Power
  Number     Number     Electrons     Momentum     of R      Exponent        Coefficient   SO-Coeffient
 ======================================================================================================
    1          6
                                   No pseudopotential on this center.
    2          6
                                   No pseudopotential on this center.
    3          6
                                   No pseudopotential on this center.
    4          6
                                   No pseudopotential on this center.
    5          6
                                   No pseudopotential on this center.
    6          6
                                   No pseudopotential on this center.
    7          1
                                   No pseudopotential on this center.
    8          1
                                   No pseudopotential on this center.
    9          6
                                   No pseudopotential on this center.
   10          8
                                   No pseudopotential on this center.
   11          1
                                   No pseudopotential on this center.
   12          8
                                   No pseudopotential on this center.
   13          8
                                   No pseudopotential on this center.
   14          1
                                   No pseudopotential on this center.
   15          8
                                   No pseudopotential on this center.
   16          1
                                   No pseudopotential on this center.
   17          8
                                   No pseudopotential on this center.
   18          1
                                   No pseudopotential on this center.
   19         24           14
                                      D and up 
                                                     1      329.2720539      -10.00000000    0.00000000
                                                     2       59.5487597      -57.94093980    0.00000000
                                                     2       14.8265966      -10.26232850    0.00000000
                                      S - D
                                                     0      100.0260653        3.00000000    0.00000000
                                                     1       67.8468124       25.25345990    0.00000000
                                                     2       34.6771006      210.64723660    0.00000000
                                                     2        7.6757005      235.28195870    0.00000000
                                                     2        7.2077427     -152.53434610    0.00000000
                                      P - D
                                                     0       47.9723321        5.00000000    0.00000000
                                                     1       59.6224873        5.63902660    0.00000000
                                                     2       26.0432600      164.83621980    0.00000000
                                                     2        6.5582692      106.01680180    0.00000000
                                                     2        6.1268236      -69.85854680    0.00000000
 ======================================================================================================
 Ernie: Thresh=  0.10000D-02 Tol=  0.10000D-05 Strict=F.
 Ernie:  1 primitive shells out of 216 were deleted.
 There are   342 symmetry adapted cartesian basis functions of A   symmetry.
 There are   328 symmetry adapted basis functions of A   symmetry.
   328 basis functions,   538 primitive gaussians,   342 cartesian basis functions
    51 alpha electrons       48 beta electrons
       nuclear repulsion energy       825.7032032655 Hartrees.
 IExCor= 4336 DFT=T Ex+Corr=M062X ExCW=0 ScaHFX=  0.540000
 ScaDFX=  1.000000  1.000000  1.000000  1.000000 ScalE2=  1.000000  1.000000
 IRadAn=      5 IRanWt=     -1 IRanGd=            0 ICorTp=0 IEmpDi=  4
 NAtoms=   19 NActive=   19 NUniq=   19 SFac= 1.00D+00 NAtFMM=   60 NAOKFM=F Big=F
 Integral buffers will be    131072 words long.
 Raffenetti 2 integral format.
 Two-electron integral symmetry is turned on.
 ------------------------------------------------------------------------------
 Polarizable Continuum Model (PCM)
 =================================
 Model                : PCM.
 Atomic radii         : SMD-Coulomb.
 Polarization charges : Total charges.
 Charge compensation  : None.
 Solution method      : On-the-fly selection.
 Cavity type          : VdW (van der Waals Surface) (Alpha=1.000).
 Cavity algorithm     : GePol (No added spheres)
                        Default sphere list used, NSphG=   19.
                        Lebedev-Laikov grids with approx.  5.0 points / Ang**2.
                        Smoothing algorithm: York/Karplus (Gamma=1.0000).
                        Polarization charges: spherical gaussians, with
                                              point-specific exponents (IZeta= 3).
                        Self-potential: point-specific (ISelfS= 7).
                        Self-field    : sphere-specific E.n sum rule (ISelfD= 2).
 1st derivatives      : Analytical E(r).r(x)/FMM algorithm (CHGder, D1EAlg=3).
                        Cavity 1st derivative terms included.
 Solvent              : Water, Eps=  78.355300 Eps(inf)=   1.777849
 ------------------------------------------------------------------------------
 Spheres list:
 ISph  on   Nord     Re0    Alpha      Xe            Ye            Ze
    1   C      1    1.8500  1.000     -0.235790      1.408547      0.007505
    2   C      2    1.8500  1.000     -1.632342      1.207568     -0.008347
    3   C      3    1.8500  1.000     -2.185055     -0.085796     -0.003361
    4   C      4    1.8500  1.000     -1.375081     -1.166503      0.016935
    5   C      5    1.8500  1.000      0.139682     -0.949166      0.034131
    6   C      6    1.8500  1.000      0.628959      0.358971      0.028205
    7   H      7    1.2000  1.000     -2.283970      2.056107     -0.024482
    8   H      8    1.2000  1.000     -1.784452     -2.155087      0.020908
    9   C      9    1.8500  1.000     -3.713925     -0.269760     -0.021048
   10   O     10    1.5200  1.000     -4.225387     -1.466325     -0.016437
   11   H     11    1.2000  1.000     -3.649642     -2.234381     -0.002012
   12   O     12    1.5200  1.000     -4.468631      0.737034     -0.039961
   13   O     13    1.5200  1.000      0.955454     -1.962827      0.053879
   14   H     14    1.2000  1.000      1.904014     -1.815446      0.064540
   15   O     15    1.5200  1.000      2.039286      0.594837      0.043903
   16   H     16    1.2000  1.000      2.219954      1.424881      0.491100
   17   O     17    1.5200  1.000      0.234056      2.622054      0.002214
   18   H     18    1.2000  1.000     -0.367866      3.369769     -0.012354
   19  Cr     19    1.5115  1.000      4.080210     -0.327800     -0.050442
 ------------------------------------------------------------------------------
 GePol: Number of generator spheres                  =      19
 GePol: Total number of spheres                      =      19
 GePol: Number of exposed spheres                    =      19 (100.00%)
 GePol: Number of points                             =    1501
 GePol: Average weight of points                     =       0.13
 GePol: Minimum weight of points                     =   0.71D-09
 GePol: Maximum weight of points                     =    0.21991
 GePol: Number of points with low weight             =      71
 GePol: Fraction of low-weight points (<1% of avg)   =       4.73%
 GePol: Cavity surface area                          =    190.444 Ang**2
 GePol: Cavity volume                                =    157.069 Ang**3
 ------------------------------------------------------------------------------
 Atomic radii for non-electrostatic terms: SMD-CDS.
 ------------------------------------------------------------------------------
 PCM non-electrostatic energy =         0.0106465979 Hartrees.
 Nuclear repulsion after PCM non-electrostatic terms =      825.7138498635 Hartrees.
 Leave Link  301 at Wed May 31 22:55:30 2023, MaxMem=  2684354560 cpu:               0.6 elap:               0.1
 (Enter /home/xut/apps/g16/l302.exe)
 NPDir=0 NMtPBC=     1 NCelOv=     1 NCel=       1 NClECP=     1 NCelD=      1
         NCelK=      1 NCelE2=     1 NClLst=     1 CellRange=     0.0.
 One-electron integrals computed using PRISM.
 One-electron integral symmetry used in STVInt
   1 Symmetry operations used in ECPInt.
 ECPInt:  NShTT=    6105 NPrTT=   23469 LenC2=    5788 LenP2D=   15708.
 LDataN:  DoStor=T MaxTD1= 4 Len=   56
 NBasis=   328 RedAO= T EigKep=  1.32D-06  NBF=   328
 NBsUse=   327 1.00D-06 EigRej=  5.82D-07 NBFU=   327
 Precomputing XC quadrature grid using
 IXCGrd= 4 IRadAn=           5 IRanWt=          -1 IRanGd=           0 AccXCQ= 0.00D+00.
 Generated NRdTot=       0 NPtTot=           0 NUsed=           0 NTot=          32
 NSgBfM=   342   342   342   342   342 MxSgAt=    19 MxSgA2=    19.
 Leave Link  302 at Wed May 31 22:55:30 2023, MaxMem=  2684354560 cpu:               2.6 elap:               0.3
 (Enter /home/xut/apps/g16/l303.exe)
 DipDrv:  MaxL=1.
 Leave Link  303 at Wed May 31 22:55:30 2023, MaxMem=  2684354560 cpu:               0.4 elap:               0.1
 (Enter /home/xut/apps/g16/l401.exe)
 ExpMin= 1.90D-02 ExpMax= 8.59D+03 ExpMxC= 1.30D+03 IAcc=3 IRadAn=         5 AccDes= 0.00D+00
 Harris functional with IExCor= 1009 and IRadAn=       5 diagonalized for initial guess.
 HarFok:  IExCor= 1009 AccDes= 0.00D+00 IRadAn=         5 IDoV= 1 UseB2=F ITyADJ=14
 ICtDFT=  3500011 ScaDFX=  1.000000  1.000000  1.000000  1.000000
 FoFCou: FMM=F IPFlag=           0 FMFlag=      100000 FMFlg1=           0
         NFxFlg=           0 DoJE=T BraDBF=F KetDBF=T FulRan=T
         wScrn=  0.000000 ICntrl=       500 IOpCl=  0 I1Cent=   200000004 NGrid=           0
         NMat0=    1 NMatS0=      1 NMatT0=    0 NMatD0=    1 NMtDS0=    0 NMtDT0=    0
 Petite list used in FoFCou.
 Harris En= -732.119792259370    
 JPrj=0 DoOrth=F DoCkMO=F.
 Initial guess <Sx>= 0.0000 <Sy>= 0.0000 <Sz>= 1.5000 <S**2>= 3.7500 S= 1.5000
 Leave Link  401 at Wed May 31 22:55:31 2023, MaxMem=  2684354560 cpu:              10.2 elap:               1.0
 (Enter /home/xut/apps/g16/l502.exe)
 Integral symmetry usage will be decided dynamically.
 UHF open shell SCF:
 Using DIIS extrapolation, IDIIS=  1040.
 NGot=  2684354560 LenX=  2684113999 LenY=  2683996594
 Requested convergence on RMS density matrix=1.00D-05 within 128 cycles.
 Requested convergence on MAX density matrix=1.00D-03.
 Requested convergence on             energy=1.00D-03.
 No special actions if energy rises.
 Fock matrices will be formed incrementally for  20 cycles.

 Cycle   1  Pass 1  IDiag  1:
 FoFJK:  IHMeth= 1 ICntrl=       0 DoSepK=F KAlg= 0 I1Cent=           0 FoldK=F
 IRaf= 910000000 NMat=       1 IRICut=       1 DoRegI=T DoRafI=F ISym2E= 0 IDoP0=0 IntGTp=1.
 FoFCou: FMM=F IPFlag=           0 FMFlag=      100000 FMFlg1=           0
         NFxFlg=           0 DoJE=F BraDBF=F KetDBF=F FulRan=T
         wScrn=  0.000000 ICntrl=         0 IOpCl=  1 I1Cent=           0 NGrid=           0
         NMat0=    1 NMatS0=      1 NMatT0=    0 NMatD0=    1 NMtDS0=    0 NMtDT0=    0
 Symmetry not used in FoFCou.
 Inv3:  Mode=1 IEnd=     6759003.
 Iteration    1 A*A^-1 deviation from unit magnitude is 2.89D-15 for    741.
 Iteration    1 A*A^-1 deviation from orthogonality  is 1.47D-15 for    820    768.
 Iteration    1 A^-1*A deviation from unit magnitude is 2.78D-15 for    204.
 Iteration    1 A^-1*A deviation from orthogonality  is 1.82D-15 for   1189    313.
 E= -728.180599244950    
 DIIS: error= 5.24D-02 at cycle   1 NSaved=   1.
 NSaved= 1 IEnMin= 1 EnMin= -728.180599244950     IErMin= 1 ErrMin= 5.24D-02
 ErrMax= 5.24D-02  0.00D+00 EMaxC= 1.00D-01 BMatC= 4.34D+00 BMatP= 4.34D+00
 IDIUse=3 WtCom= 4.76D-01 WtEn= 5.24D-01
 Coeff-Com:  0.100D+01
 Coeff-En:   0.100D+01
 Coeff:      0.100D+01
 Gap=    -0.436 Goal=   None    Shift=    0.000
 Gap=     0.223 Goal=   None    Shift=    0.000
 GapD=   -0.436 DampG=0.250 DampE=0.250 DampFc=0.1250 IDamp=-1.
 Damping current iteration by 1.25D-01
 RMSDP=7.45D-01 MaxDP=6.11D+01              OVMax= 1.00D+00

 Cycle   2  Pass 1  IDiag  1:
 RMSU=  6.85D-02    CP:  1.69D+00
 E= -729.853769810692     Delta-E=       -1.673170565743 Rises=F Damp=T
 DIIS: error= 3.35D-02 at cycle   2 NSaved=   2.
 NSaved= 2 IEnMin= 2 EnMin= -729.853769810692     IErMin= 2 ErrMin= 3.35D-02
 ErrMax= 3.35D-02  0.00D+00 EMaxC= 1.00D-01 BMatC= 1.75D+00 BMatP= 4.34D+00
 IDIUse=3 WtCom= 6.65D-01 WtEn= 3.35D-01
 Coeff-Com: -0.140D+01 0.240D+01
 Coeff-En:   0.000D+00 0.100D+01
 Coeff:     -0.930D+00 0.193D+01
 Gap=     0.134 Goal=   None    Shift=    0.000
 Gap=    -0.077 Goal=   None    Shift=    0.000
 RMSDP=6.56D-02 MaxDP=5.46D+00 DE=-1.67D+00 OVMax= 9.80D-01

 Cycle   3  Pass 1  IDiag  1:
 RMSU=  3.50D-02    CP:  1.20D+00  5.22D-01
 E= -721.154062423315     Delta-E=        8.699707387377 Rises=F Damp=F
 DIIS: error= 1.70D-01 at cycle   3 NSaved=   3.
 NSaved= 3 IEnMin= 2 EnMin= -729.853769810692     IErMin= 2 ErrMin= 3.35D-02
 ErrMax= 1.70D-01  0.00D+00 EMaxC= 1.00D-01 BMatC= 1.99D+01 BMatP= 1.75D+00
 IDIUse=2 WtCom= 0.00D+00 WtEn= 1.00D+00
 EnCoef did   100 forward-backward iterations
 Coeff-En:   0.609D+00 0.507D-01 0.341D+00
 Coeff:      0.609D+00 0.507D-01 0.341D+00
 Gap=     0.112 Goal=   None    Shift=    0.000
 Gap=     0.054 Goal=   None    Shift=    0.000
 RMSDP=5.58D-02 MaxDP=5.33D+00 DE= 8.70D+00 OVMax= 9.93D-01

 Cycle   4  Pass 1  IDiag  1:
 RMSU=  2.02D-02    CP:  8.39D-01 -2.19D-02  5.64D-01
 E= -732.014670013521     Delta-E=      -10.860607590206 Rises=F Damp=F
 DIIS: error= 1.20D-02 at cycle   4 NSaved=   4.
 NSaved= 4 IEnMin= 4 EnMin= -732.014670013521     IErMin= 4 ErrMin= 1.20D-02
 ErrMax= 1.20D-02  0.00D+00 EMaxC= 1.00D-01 BMatC= 2.98D-01 BMatP= 1.75D+00
 IDIUse=3 WtCom= 8.80D-01 WtEn= 1.20D-01
 Coeff-Com: -0.257D+00 0.596D+00 0.181D-02 0.659D+00
 Coeff-En:   0.000D+00 0.000D+00 0.000D+00 0.100D+01
 Coeff:     -0.227D+00 0.525D+00 0.159D-02 0.700D+00
 Gap=     0.211 Goal=   None    Shift=    0.000
 Gap=     0.234 Goal=   None    Shift=    0.000
 RMSDP=1.14D-02 MaxDP=7.96D-01 DE=-1.09D+01 OVMax= 2.06D-01

 Cycle   5  Pass 1  IDiag  1:
 RMSU=  8.31D-03    CP:  8.61D-01  4.60D-02  6.41D-01  7.35D-01
 E= -732.098426057762     Delta-E=       -0.083756044241 Rises=F Damp=F
 DIIS: error= 9.61D-03 at cycle   5 NSaved=   5.
 NSaved= 5 IEnMin= 5 EnMin= -732.098426057762     IErMin= 5 ErrMin= 9.61D-03
 ErrMax= 9.61D-03  0.00D+00 EMaxC= 1.00D-01 BMatC= 1.60D-01 BMatP= 2.98D-01
 IDIUse=3 WtCom= 9.04D-01 WtEn= 9.61D-02
 Coeff-Com: -0.150D+00 0.311D+00-0.180D-01 0.334D+00 0.523D+00
 Coeff-En:   0.000D+00 0.000D+00 0.000D+00 0.000D+00 0.100D+01
 Coeff:     -0.135D+00 0.281D+00-0.163D-01 0.302D+00 0.569D+00
 Gap=     0.214 Goal=   None    Shift=    0.000
 Gap=     0.139 Goal=   None    Shift=    0.000
 RMSDP=5.27D-03 MaxDP=2.94D-01 DE=-8.38D-02 OVMax= 9.12D-02

 Cycle   6  Pass 1  IDiag  1:
 RMSU=  3.09D-03    CP:  8.32D-01  1.53D-02  5.72D-01  7.67D-01  9.16D-01
 E= -732.145885057767     Delta-E=       -0.047459000005 Rises=F Damp=F
 DIIS: error= 4.01D-03 at cycle   6 NSaved=   6.
 NSaved= 6 IEnMin= 6 EnMin= -732.145885057767     IErMin= 6 ErrMin= 4.01D-03
 ErrMax= 4.01D-03  0.00D+00 EMaxC= 1.00D-01 BMatC= 2.23D-02 BMatP= 1.60D-01
 IDIUse=3 WtCom= 9.60D-01 WtEn= 4.01D-02
 Coeff-Com:  0.119D-01 0.934D-02-0.972D-02 0.272D-01 0.172D+00 0.789D+00
 Coeff-En:   0.000D+00 0.000D+00 0.000D+00 0.000D+00 0.000D+00 0.100D+01
 Coeff:      0.115D-01 0.897D-02-0.933D-02 0.261D-01 0.165D+00 0.798D+00
 Gap=     0.251 Goal=   None    Shift=    0.000
 Gap=     0.155 Goal=   None    Shift=    0.000
 RMSDP=4.15D-03 MaxDP=2.75D-01 DE=-4.75D-02 OVMax= 8.92D-02

 Cycle   7  Pass 1  IDiag  1:
 RMSU=  2.36D-03    CP:  8.20D-01 -1.47D-02  5.20D-01  7.90D-01  8.29D-01
                    CP:  1.46D+00
 E= -732.163880999552     Delta-E=       -0.017995941785 Rises=F Damp=F
 DIIS: error= 2.52D-03 at cycle   7 NSaved=   7.
 NSaved= 7 IEnMin= 7 EnMin= -732.163880999552     IErMin= 7 ErrMin= 2.52D-03
 ErrMax= 2.52D-03  0.00D+00 EMaxC= 1.00D-01 BMatC= 9.28D-03 BMatP= 2.23D-02
 IDIUse=3 WtCom= 9.75D-01 WtEn= 2.52D-02
 Coeff-Com:  0.586D-02 0.710D-02-0.385D-02-0.514D-01-0.746D-01 0.130D+00
 Coeff-Com:  0.987D+00
 Coeff-En:   0.000D+00 0.000D+00 0.000D+00 0.000D+00 0.000D+00 0.000D+00
 Coeff-En:   0.100D+01
 Coeff:      0.571D-02 0.692D-02-0.375D-02-0.501D-01-0.727D-01 0.127D+00
 Coeff:      0.987D+00
 Gap=     0.267 Goal=   None    Shift=    0.000
 Gap=     0.161 Goal=   None    Shift=    0.000
 RMSDP=2.00D-03 MaxDP=1.69D-01 DE=-1.80D-02 OVMax= 1.15D-01

 Cycle   8  Pass 1  IDiag  1:
 RMSU=  1.14D-03    CP:  8.10D-01 -2.98D-02  5.07D-01  7.79D-01  7.97D-01
                    CP:  1.43D+00  1.30D+00
 E= -732.177693272489     Delta-E=       -0.013812272937 Rises=F Damp=F
 DIIS: error= 2.01D-03 at cycle   8 NSaved=   8.
 NSaved= 8 IEnMin= 8 EnMin= -732.177693272489     IErMin= 8 ErrMin= 2.01D-03
 ErrMax= 2.01D-03  0.00D+00 EMaxC= 1.00D-01 BMatC= 4.85D-03 BMatP= 9.28D-03
 IDIUse=3 WtCom= 9.80D-01 WtEn= 2.01D-02
 Coeff-Com: -0.945D-02 0.266D-01-0.257D-02 0.330D-01-0.104D-01-0.312D+00
 Coeff-Com: -0.392D-01 0.131D+01
 Coeff-En:   0.000D+00 0.000D+00 0.000D+00 0.000D+00 0.000D+00 0.000D+00
 Coeff-En:   0.000D+00 0.100D+01
 Coeff:     -0.926D-02 0.260D-01-0.252D-02 0.323D-01-0.102D-01-0.306D+00
 Coeff:     -0.384D-01 0.131D+01
 Gap=     0.280 Goal=   None    Shift=    0.000
 Gap=     0.163 Goal=   None    Shift=    0.000
 RMSDP=2.23D-03 MaxDP=2.27D-01 DE=-1.38D-02 OVMax= 1.23D-01

 Cycle   9  Pass 1  IDiag  1:
 RMSU=  6.74D-04    CP:  7.99D-01 -4.45D-02  4.93D-01  7.64D-01  7.60D-01
                    CP:  1.32D+00  1.53D+00  2.18D+00
 E= -732.187393118164     Delta-E=       -0.009699845674 Rises=F Damp=F
 DIIS: error= 1.38D-03 at cycle   9 NSaved=   9.
 NSaved= 9 IEnMin= 9 EnMin= -732.187393118164     IErMin= 9 ErrMin= 1.38D-03
 ErrMax= 1.38D-03  0.00D+00 EMaxC= 1.00D-01 BMatC= 2.59D-03 BMatP= 4.85D-03
 IDIUse=3 WtCom= 9.86D-01 WtEn= 1.38D-02
 Coeff-Com: -0.124D-01 0.175D-01-0.161D-02 0.818D-01 0.635D-01-0.320D+00
 Coeff-Com: -0.859D+00 0.915D+00 0.112D+01
 Coeff-En:   0.000D+00 0.000D+00 0.000D+00 0.000D+00 0.000D+00 0.000D+00
 Coeff-En:   0.000D+00 0.000D+00 0.100D+01
 Coeff:     -0.122D-01 0.173D-01-0.159D-02 0.807D-01 0.626D-01-0.315D+00
 Coeff:     -0.847D+00 0.902D+00 0.111D+01
 Gap=     0.296 Goal=   None    Shift=    0.000
 Gap=     0.164 Goal=   None    Shift=    0.000
 RMSDP=2.43D-03 MaxDP=2.28D-01 DE=-9.70D-03 OVMax= 1.29D-01

 Cycle  10  Pass 1  IDiag  1:
 RMSU=  9.49D-04    CP:  7.93D-01 -6.00D-02  4.72D-01  7.59D-01  7.28D-01
                    CP:  1.18D+00  1.81D+00  3.00D+00  1.91D+00
 E= -732.192328423211     Delta-E=       -0.004935305048 Rises=F Damp=F
 DIIS: error= 5.59D-04 at cycle  10 NSaved=  10.
 NSaved=10 IEnMin=10 EnMin= -732.192328423211     IErMin=10 ErrMin= 5.59D-04
 ErrMax= 5.59D-04  0.00D+00 EMaxC= 1.00D-01 BMatC= 3.91D-04 BMatP= 2.59D-03
 IDIUse=3 WtCom= 9.94D-01 WtEn= 5.59D-03
 Coeff-Com: -0.257D-02 0.467D-02-0.457D-03 0.217D-01 0.145D-01-0.309D-01
 Coeff-Com: -0.165D+00-0.212D-03 0.326D+00 0.833D+00
 Coeff-En:   0.000D+00 0.000D+00 0.000D+00 0.000D+00 0.000D+00 0.000D+00
 Coeff-En:   0.000D+00 0.000D+00 0.000D+00 0.100D+01
 Coeff:     -0.256D-02 0.464D-02-0.455D-03 0.216D-01 0.144D-01-0.307D-01
 Coeff:     -0.165D+00-0.210D-03 0.324D+00 0.834D+00
 Gap=     0.285 Goal=   None    Shift=    0.000
 Gap=     0.165 Goal=   None    Shift=    0.000
 RMSDP=4.61D-04 MaxDP=3.65D-02 DE=-4.94D-03 OVMax= 2.01D-02

 Cycle  11  Pass 1  IDiag  1:
 RMSU=  3.63D-04    CP:  7.93D-01 -5.84D-02  4.74D-01  7.60D-01  7.34D-01
                    CP:  1.22D+00  1.77D+00  3.00D+00  1.84D+00  8.16D-01
 E= -732.192725155989     Delta-E=       -0.000396732778 Rises=F Damp=F
 DIIS: error= 3.68D-04 at cycle  11 NSaved=  11.
 NSaved=11 IEnMin=11 EnMin= -732.192725155989     IErMin=11 ErrMin= 3.68D-04
 ErrMax= 3.68D-04  0.00D+00 EMaxC= 1.00D-01 BMatC= 1.52D-04 BMatP= 3.91D-04
 IDIUse=3 WtCom= 9.96D-01 WtEn= 3.68D-03
 Coeff-Com: -0.780D-03 0.497D-03-0.887D-04-0.758D-02-0.715D-02 0.458D-01
 Coeff-Com:  0.867D-01-0.155D+00-0.748D-01 0.267D+00 0.845D+00
 Coeff-En:   0.000D+00 0.000D+00 0.000D+00 0.000D+00 0.000D+00 0.000D+00
 Coeff-En:   0.000D+00 0.000D+00 0.000D+00 0.000D+00 0.100D+01
 Coeff:     -0.777D-03 0.495D-03-0.883D-04-0.755D-02-0.713D-02 0.456D-01
 Coeff:      0.864D-01-0.155D+00-0.746D-01 0.266D+00 0.846D+00
 Gap=     0.285 Goal=   None    Shift=    0.000
 Gap=     0.165 Goal=   None    Shift=    0.000
 RMSDP=3.11D-04 MaxDP=2.56D-02 DE=-3.97D-04 OVMax= 1.31D-02

 Cycle  12  Pass 1  IDiag  1:
 RMSU=  1.45D-04    CP:  7.94D-01 -5.93D-02  4.74D-01  7.62D-01  7.45D-01
                    CP:  1.25D+00  1.75D+00  3.00D+00  1.79D+00  7.22D-01
                    CP:  1.53D+00
 E= -732.192979315614     Delta-E=       -0.000254159625 Rises=F Damp=F
 DIIS: error= 3.35D-04 at cycle  12 NSaved=  12.
 NSaved=12 IEnMin=12 EnMin= -732.192979315614     IErMin=12 ErrMin= 3.35D-04
 ErrMax= 3.35D-04  0.00D+00 EMaxC= 1.00D-01 BMatC= 8.99D-05 BMatP= 1.52D-04
 IDIUse=3 WtCom= 9.97D-01 WtEn= 3.35D-03
 Coeff-Com: -0.706D-03 0.120D-02 0.183D-03-0.692D-02-0.366D-02 0.204D-01
 Coeff-Com:  0.598D-01-0.372D-01-0.110D+00-0.186D+00 0.210D+00 0.105D+01
 Coeff-En:   0.000D+00 0.000D+00 0.000D+00 0.000D+00 0.000D+00 0.000D+00
 Coeff-En:   0.000D+00 0.000D+00 0.000D+00 0.000D+00 0.000D+00 0.100D+01
 Coeff:     -0.703D-03 0.119D-02 0.182D-03-0.689D-02-0.365D-02 0.204D-01
 Coeff:      0.596D-01-0.371D-01-0.110D+00-0.185D+00 0.209D+00 0.105D+01
 Gap=     0.285 Goal=   None    Shift=    0.000
 Gap=     0.164 Goal=   None    Shift=    0.000
 RMSDP=1.73D-04 MaxDP=1.29D-02 DE=-2.54D-04 OVMax= 1.44D-02

 Cycle  13  Pass 1  IDiag  1:
 RMSU=  9.04D-05    CP:  7.94D-01 -5.90D-02  4.73D-01  7.63D-01  7.48D-01
                    CP:  1.26D+00  1.74D+00  3.00D+00  1.76D+00  6.92D-01
                    CP:  1.84D+00  1.39D+00
 E= -732.193256437207     Delta-E=       -0.000277121593 Rises=F Damp=F
 DIIS: error= 3.09D-04 at cycle  13 NSaved=  13.
 NSaved=13 IEnMin=13 EnMin= -732.193256437207     IErMin=13 ErrMin= 3.09D-04
 ErrMax= 3.09D-04  0.00D+00 EMaxC= 1.00D-01 BMatC= 7.30D-05 BMatP= 8.99D-05
 IDIUse=3 WtCom= 9.97D-01 WtEn= 3.09D-03
 Coeff-Com:  0.545D-03-0.398D-03 0.132D-03-0.161D-02-0.151D-02 0.422D-02
 Coeff-Com:  0.218D-01-0.785D-02-0.341D-01-0.197D-01-0.106D+00-0.482D-01
 Coeff-Com:  0.119D+01
 Coeff-En:   0.000D+00 0.000D+00 0.000D+00 0.000D+00 0.000D+00 0.000D+00
 Coeff-En:   0.000D+00 0.000D+00 0.000D+00 0.000D+00 0.000D+00 0.000D+00
 Coeff-En:   0.100D+01
 Coeff:      0.543D-03-0.397D-03 0.132D-03-0.160D-02-0.151D-02 0.420D-02
 Coeff:      0.217D-01-0.782D-02-0.340D-01-0.196D-01-0.106D+00-0.481D-01
 Coeff:      0.119D+01
 Gap=     0.285 Goal=   None    Shift=    0.000
 Gap=     0.164 Goal=   None    Shift=    0.000
 RMSDP=1.61D-04 MaxDP=9.92D-03 DE=-2.77D-04 OVMax= 1.38D-02

 Cycle  14  Pass 1  IDiag  1:
 RMSU=  9.50D-05    CP:  7.94D-01 -5.83D-02  4.73D-01  7.62D-01  7.49D-01
                    CP:  1.26D+00  1.76D+00  3.00D+00  1.78D+00  7.38D-01
                    CP:  1.92D+00  1.38D+00  1.88D+00
 E= -732.193514659876     Delta-E=       -0.000258222669 Rises=F Damp=F
 DIIS: error= 2.97D-04 at cycle  14 NSaved=  14.
 NSaved=14 IEnMin=14 EnMin= -732.193514659876     IErMin=14 ErrMin= 2.97D-04
 ErrMax= 2.97D-04  0.00D+00 EMaxC= 1.00D-01 BMatC= 6.77D-05 BMatP= 7.30D-05
 IDIUse=3 WtCom= 9.97D-01 WtEn= 2.97D-03
 Coeff-Com:  0.170D-02-0.204D-02-0.677D-04 0.108D-02-0.226D-02-0.655D-02
 Coeff-Com:  0.648D-02-0.261D-02 0.284D-01 0.179D+00-0.253D+00-0.119D+01
 Coeff-Com:  0.641D+00 0.160D+01
 Coeff-En:   0.000D+00 0.000D+00 0.000D+00 0.000D+00 0.000D+00 0.000D+00
 Coeff-En:   0.000D+00 0.000D+00 0.000D+00 0.000D+00 0.000D+00 0.000D+00
 Coeff-En:   0.000D+00 0.100D+01
 Coeff:      0.169D-02-0.203D-02-0.675D-04 0.108D-02-0.225D-02-0.653D-02
 Coeff:      0.646D-02-0.260D-02 0.283D-01 0.179D+00-0.252D+00-0.119D+01
 Coeff:      0.639D+00 0.160D+01
 Gap=     0.285 Goal=   None    Shift=    0.000
 Gap=     0.164 Goal=   None    Shift=    0.000
 RMSDP=3.72D-04 MaxDP=2.19D-02 DE=-2.58D-04 OVMax= 3.23D-02

 Cycle  15  Pass 1  IDiag  1:
 RMSU=  1.01D-04    CP:  7.96D-01 -5.69D-02  4.71D-01  7.61D-01  7.51D-01
                    CP:  1.27D+00  1.81D+00  3.00D+00  1.83D+00  8.59D-01
                    CP:  2.10D+00  1.42D+00  3.00D+00  3.00D+00
 E= -732.194054803982     Delta-E=       -0.000540144106 Rises=F Damp=F
 DIIS: error= 2.69D-04 at cycle  15 NSaved=  15.
 NSaved=15 IEnMin=15 EnMin= -732.194054803982     IErMin=15 ErrMin= 2.69D-04
 ErrMax= 2.69D-04  0.00D+00 EMaxC= 1.00D-01 BMatC= 5.69D-05 BMatP= 6.77D-05
 IDIUse=3 WtCom= 9.97D-01 WtEn= 2.69D-03
 Coeff-Com:  0.613D-03-0.578D-03-0.313D-03-0.374D-02-0.453D-02 0.253D-02
 Coeff-Com:  0.456D-01-0.160D-01-0.494D-01-0.425D-01 0.935D-01 0.168D+00
 Coeff-Com: -0.117D+01 0.230D+00 0.174D+01
 Coeff-En:   0.000D+00 0.000D+00 0.000D+00 0.000D+00 0.000D+00 0.000D+00
 Coeff-En:   0.000D+00 0.000D+00 0.000D+00 0.000D+00 0.000D+00 0.000D+00
 Coeff-En:   0.000D+00 0.000D+00 0.100D+01
 Coeff:      0.611D-03-0.576D-03-0.312D-03-0.373D-02-0.451D-02 0.253D-02
 Coeff:      0.455D-01-0.159D-01-0.492D-01-0.424D-01 0.933D-01 0.168D+00
 Coeff:     -0.116D+01 0.230D+00 0.174D+01
 Gap=     0.285 Goal=   None    Shift=    0.000
 Gap=     0.164 Goal=   None    Shift=    0.000
 RMSDP=4.72D-04 MaxDP=2.71D-02 DE=-5.40D-04 OVMax= 4.13D-02

 Cycle  16  Pass 1  IDiag  1:
 RMSU=  2.47D-04    CP:  7.97D-01 -5.52D-02  4.70D-01  7.59D-01  7.55D-01
                    CP:  1.27D+00  1.87D+00  3.00D+00  1.89D+00  9.94D-01
                    CP:  2.35D+00  1.62D+00  3.00D+00  3.00D+00  3.00D+00
 E= -732.194685576782     Delta-E=       -0.000630772800 Rises=F Damp=F
 DIIS: error= 2.35D-04 at cycle  16 NSaved=  16.
 NSaved=16 IEnMin=16 EnMin= -732.194685576782     IErMin=16 ErrMin= 2.35D-04
 ErrMax= 2.35D-04  0.00D+00 EMaxC= 1.00D-01 BMatC= 4.67D-05 BMatP= 5.69D-05
 IDIUse=3 WtCom= 9.98D-01 WtEn= 2.35D-03
 Coeff-Com: -0.470D-04 0.423D-03-0.307D-03-0.315D-02-0.716D-03 0.971D-02
 Coeff-Com:  0.295D-01-0.686D-02-0.766D-01-0.190D+00 0.154D+00 0.138D+01
 Coeff-Com: -0.439D+00-0.172D+01-0.302D+00 0.217D+01
 Coeff-En:   0.000D+00 0.000D+00 0.000D+00 0.000D+00 0.000D+00 0.000D+00
 Coeff-En:   0.000D+00 0.000D+00 0.000D+00 0.000D+00 0.000D+00 0.000D+00
 Coeff-En:   0.000D+00 0.000D+00 0.000D+00 0.100D+01
 Coeff:     -0.469D-04 0.422D-03-0.306D-03-0.314D-02-0.714D-03 0.969D-02
 Coeff:      0.295D-01-0.685D-02-0.765D-01-0.190D+00 0.154D+00 0.138D+01
 Coeff:     -0.438D+00-0.172D+01-0.301D+00 0.216D+01
 Gap=     0.285 Goal=   None    Shift=    0.000
 Gap=     0.164 Goal=   None    Shift=    0.000
 RMSDP=5.99D-04 MaxDP=3.58D-02 DE=-6.31D-04 OVMax= 5.16D-02

 Cycle  17  Pass 1  IDiag  1:
 RMSU=  2.51D-04    CP:  7.99D-01 -5.34D-02  4.68D-01  7.58D-01  7.61D-01
                    CP:  1.26D+00  1.94D+00  3.00D+00  1.97D+00  1.13D+00
                    CP:  2.65D+00  2.13D+00  3.00D+00  3.00D+00  3.00D+00
                    CP:  2.66D+00
 E= -732.195409754600     Delta-E=       -0.000724177818 Rises=F Damp=F
 DIIS: error= 2.04D-04 at cycle  17 NSaved=  17.
 NSaved=17 IEnMin=17 EnMin= -732.195409754600     IErMin=17 ErrMin= 2.04D-04
 ErrMax= 2.04D-04  0.00D+00 EMaxC= 1.00D-01 BMatC= 3.63D-05 BMatP= 4.67D-05
 IDIUse=3 WtCom= 9.98D-01 WtEn= 2.04D-03
 Coeff-Com:  0.287D-03-0.261D-03-0.134D-03-0.177D-02-0.395D-03 0.958D-02
 Coeff-Com:  0.143D-01-0.129D-01-0.388D-01-0.492D-01-0.445D-02 0.597D+00
 Coeff-Com:  0.597D+00-0.103D+01-0.147D+01 0.115D+01 0.124D+01
 Coeff-En:   0.000D+00 0.000D+00 0.000D+00 0.000D+00 0.000D+00 0.000D+00
 Coeff-En:   0.000D+00 0.000D+00 0.000D+00 0.000D+00 0.000D+00 0.000D+00
 Coeff-En:   0.000D+00 0.000D+00 0.000D+00 0.000D+00 0.100D+01
 Coeff:      0.287D-03-0.261D-03-0.133D-03-0.176D-02-0.394D-03 0.956D-02
 Coeff:      0.143D-01-0.128D-01-0.387D-01-0.491D-01-0.444D-02 0.596D+00
 Coeff:      0.596D+00-0.103D+01-0.146D+01 0.114D+01 0.124D+01
 Gap=     0.285 Goal=   None    Shift=    0.000
 Gap=     0.164 Goal=   None    Shift=    0.000
 RMSDP=5.63D-04 MaxDP=3.39D-02 DE=-7.24D-04 OVMax= 4.62D-02

 Cycle  18  Pass 1  IDiag  1:
 RMSU=  2.76D-04    CP:  8.02D-01 -5.15D-02  4.66D-01  7.57D-01  7.67D-01
                    CP:  1.27D+00  1.99D+00  3.00D+00  2.04D+00  1.21D+00
                    CP:  2.95D+00  2.82D+00  3.00D+00  3.00D+00  3.00D+00
                    CP:  3.00D+00  2.03D+00
 E= -732.195981013928     Delta-E=       -0.000571259328 Rises=F Damp=F
 DIIS: error= 1.69D-04 at cycle  18 NSaved=  18.
 NSaved=18 IEnMin=18 EnMin= -732.195981013928     IErMin=18 ErrMin= 1.69D-04
 ErrMax= 1.69D-04  0.00D+00 EMaxC= 1.00D-01 BMatC= 2.79D-05 BMatP= 3.63D-05
 IDIUse=3 WtCom= 9.98D-01 WtEn= 1.69D-03
 Coeff-Com:  0.300D-03-0.462D-03-0.812D-05 0.218D-03-0.866D-03 0.252D-02
 Coeff-Com:  0.130D-01-0.249D-01 0.181D-01 0.170D+00-0.149D+00-0.116D+01
 Coeff-Com:  0.624D+00 0.150D+01-0.167D+00-0.183D+01 0.139D+00 0.187D+01
 Coeff-En:   0.000D+00 0.000D+00 0.000D+00 0.000D+00 0.000D+00 0.000D+00
 Coeff-En:   0.000D+00 0.000D+00 0.000D+00 0.000D+00 0.000D+00 0.000D+00
 Coeff-En:   0.000D+00 0.000D+00 0.000D+00 0.000D+00 0.000D+00 0.100D+01
 Coeff:      0.299D-03-0.461D-03-0.811D-05 0.218D-03-0.865D-03 0.251D-02
 Coeff:      0.130D-01-0.248D-01 0.180D-01 0.170D+00-0.149D+00-0.116D+01
 Coeff:      0.623D+00 0.149D+01-0.167D+00-0.183D+01 0.139D+00 0.187D+01
 Gap=     0.285 Goal=   None    Shift=    0.000
 Gap=     0.164 Goal=   None    Shift=    0.000
 RMSDP=6.87D-04 MaxDP=4.20D-02 DE=-5.71D-04 OVMax= 5.79D-02

 Cycle  19  Pass 1  IDiag  1:
 RMSU=  2.66D-04    CP:  8.05D-01 -4.86D-02  4.64D-01  7.57D-01  7.75D-01
                    CP:  1.30D+00  2.01D+00  3.00D+00  2.07D+00  1.16D+00
                    CP:  3.00D+00  3.00D+00  3.00D+00  3.00D+00  3.00D+00
                    CP:  3.00D+00  3.00D+00  2.26D+00
 E= -732.196545835933     Delta-E=       -0.000564822005 Rises=F Damp=F
 DIIS: error= 1.43D-04 at cycle  19 NSaved=  19.
 NSaved=19 IEnMin=19 EnMin= -732.196545835933     IErMin=19 ErrMin= 1.43D-04
 ErrMax= 1.43D-04  0.00D+00 EMaxC= 1.00D-01 BMatC= 2.07D-05 BMatP= 2.79D-05
 IDIUse=3 WtCom= 9.99D-01 WtEn= 1.43D-03
 Coeff-Com: -0.274D-03 0.283D-03 0.318D-04-0.598D-03-0.594D-04 0.269D-02
 Coeff-Com:  0.752D-02-0.102D-01-0.148D-02 0.138D-01 0.208D-01-0.179D+00
 Coeff-Com: -0.198D+00 0.368D+00 0.374D+00-0.346D+00-0.470D+00-0.363D+00
 Coeff-Com:  0.178D+01
 Coeff-En:   0.000D+00 0.000D+00 0.000D+00 0.000D+00 0.000D+00 0.000D+00
 Coeff-En:   0.000D+00 0.000D+00 0.000D+00 0.000D+00 0.000D+00 0.000D+00
 Coeff-En:   0.000D+00 0.000D+00 0.000D+00 0.000D+00 0.000D+00 0.000D+00
 Coeff-En:   0.100D+01
 Coeff:     -0.273D-03 0.283D-03 0.318D-04-0.598D-03-0.593D-04 0.269D-02
 Coeff:      0.750D-02-0.102D-01-0.148D-02 0.138D-01 0.207D-01-0.179D+00
 Coeff:     -0.198D+00 0.368D+00 0.373D+00-0.345D+00-0.469D+00-0.362D+00
 Coeff:      0.178D+01
 Gap=     0.285 Goal=   None    Shift=    0.000
 Gap=     0.164 Goal=   None    Shift=    0.000
 RMSDP=5.88D-04 MaxDP=3.60D-02 DE=-5.65D-04 OVMax= 5.72D-02

 Cycle  20  Pass 1  IDiag  1:
 RMSU=  3.40D-04    CP:  8.08D-01 -4.69D-02  4.62D-01  7.58D-01  7.82D-01
                    CP:  1.30D+00  2.03D+00  3.00D+00  2.12D+00  1.15D+00
                    CP:  3.00D+00  3.00D+00  3.00D+00  3.00D+00  3.00D+00
                    CP:  3.00D+00  3.00D+00  3.00D+00  2.03D+00
 E= -732.197010205993     Delta-E=       -0.000464370060 Rises=F Damp=F
 DIIS: error= 1.32D-04 at cycle  20 NSaved=  20.
 NSaved=20 IEnMin=20 EnMin= -732.197010205993     IErMin=20 ErrMin= 1.32D-04
 ErrMax= 1.32D-04  0.00D+00 EMaxC= 1.00D-01 BMatC= 1.92D-05 BMatP= 2.07D-05
 IDIUse=3 WtCom= 9.99D-01 WtEn= 1.32D-03
 Coeff-Com: -0.628D-03 0.919D-03-0.416D-05-0.113D-02 0.190D-03 0.515D-02
 Coeff-Com:  0.902D-02-0.734D-02-0.197D-01-0.476D-01 0.555D-01 0.301D+00
 Coeff-Com: -0.184D+00-0.307D+00 0.846D-01 0.452D+00-0.205D+00-0.943D+00
 Coeff-Com:  0.987D+00 0.819D+00
 Coeff-En:   0.000D+00 0.000D+00 0.000D+00 0.000D+00 0.000D+00 0.000D+00
 Coeff-En:   0.000D+00 0.000D+00 0.000D+00 0.000D+00 0.000D+00 0.000D+00
 Coeff-En:   0.000D+00 0.000D+00 0.000D+00 0.000D+00 0.000D+00 0.000D+00
 Coeff-En:   0.000D+00 0.100D+01
 Coeff:     -0.627D-03 0.918D-03-0.415D-05-0.112D-02 0.190D-03 0.515D-02
 Coeff:      0.901D-02-0.733D-02-0.196D-01-0.476D-01 0.554D-01 0.300D+00
 Coeff:     -0.184D+00-0.306D+00 0.845D-01 0.451D+00-0.204D+00-0.942D+00
 Coeff:      0.986D+00 0.819D+00
 Gap=     0.285 Goal=   None    Shift=    0.000
 Gap=     0.164 Goal=   None    Shift=    0.000
 RMSDP=2.48D-04 MaxDP=1.36D-02 DE=-4.64D-04 OVMax= 2.32D-02

 Cycle  21  Pass 1  IDiag  1:
 Restarting incremental Fock formation.
 E= -732.197182731693     Delta-E=       -0.000172525700 Rises=F Damp=F
 DIIS: error= 1.19D-04 at cycle  21 NSaved=  20.
 NSaved=20 IEnMin=20 EnMin= -732.197182731693     IErMin=20 ErrMin= 1.19D-04
 ErrMax= 1.19D-04  0.00D+00 EMaxC= 1.00D-01 BMatC= 1.59D-05 BMatP= 1.92D-05
 IDIUse=3 WtCom= 9.99D-01 WtEn= 1.19D-03
 Coeff-Com:  0.432D-03-0.588D-03 0.101D-02 0.402D-03-0.124D-02-0.894D-02
 Coeff-Com:  0.461D-02 0.493D-02 0.211D-01-0.464D-01 0.962D-01 0.285D+00
 Coeff-Com: -0.346D+00-0.606D+00 0.399D+00 0.611D+00 0.194D+00-0.149D+01
 Coeff-Com: -0.579D+00 0.246D+01
 Coeff-En:   0.000D+00 0.000D+00 0.000D+00 0.000D+00 0.000D+00 0.000D+00
 Coeff-En:   0.000D+00 0.000D+00 0.000D+00 0.000D+00 0.000D+00 0.000D+00
 Coeff-En:   0.000D+00 0.000D+00 0.000D+00 0.000D+00 0.000D+00 0.000D+00
 Coeff-En:   0.000D+00 0.100D+01
 Coeff:      0.431D-03-0.587D-03 0.101D-02 0.402D-03-0.124D-02-0.893D-02
 Coeff:      0.461D-02 0.493D-02 0.211D-01-0.463D-01 0.961D-01 0.284D+00
 Coeff:     -0.345D+00-0.606D+00 0.398D+00 0.610D+00 0.194D+00-0.149D+01
 Coeff:     -0.578D+00 0.246D+01
 Gap=     0.285 Goal=   None    Shift=    0.000
 Gap=     0.164 Goal=   None    Shift=    0.000
 RMSDP=7.25D-04 MaxDP=4.96D-02 DE=-1.73D-04 OVMax= 5.33D-02

 Cycle  22  Pass 1  IDiag  1:
 RMSU=  7.24D-04    CP:  9.99D-01
 E= -732.197558437484     Delta-E=       -0.000375705791 Rises=F Damp=F
 DIIS: error= 1.20D-04 at cycle  22 NSaved=  20.
 NSaved=20 IEnMin=20 EnMin= -732.197558437484     IErMin=19 ErrMin= 1.19D-04
 ErrMax= 1.20D-04  0.00D+00 EMaxC= 1.00D-01 BMatC= 1.67D-05 BMatP= 1.59D-05
 IDIUse=3 WtCom= 9.99D-01 WtEn= 1.19D-03
 Coeff-Com:  0.771D-04 0.884D-03-0.138D-04-0.308D-02-0.259D-02 0.112D-02
 Coeff-Com:  0.641D-02 0.406D-01-0.833D-01-0.224D+00 0.469D+00 0.190D+00
 Coeff-Com: -0.480D+00-0.274D+00 0.412D+00 0.564D+00-0.921D+00-0.119D+01
 Coeff-Com:  0.168D+01 0.813D+00
 Coeff-En:   0.000D+00 0.000D+00 0.000D+00 0.000D+00 0.000D+00 0.000D+00
 Coeff-En:   0.000D+00 0.000D+00 0.000D+00 0.000D+00 0.000D+00 0.000D+00
 Coeff-En:   0.000D+00 0.000D+00 0.000D+00 0.000D+00 0.000D+00 0.000D+00
 Coeff-En:   0.000D+00 0.100D+01
 Coeff:      0.770D-04 0.883D-03-0.138D-04-0.307D-02-0.258D-02 0.112D-02
 Coeff:      0.641D-02 0.406D-01-0.832D-01-0.223D+00 0.468D+00 0.189D+00
 Coeff:     -0.480D+00-0.273D+00 0.412D+00 0.564D+00-0.920D+00-0.119D+01
 Coeff:      0.168D+01 0.813D+00
 Gap=     0.285 Goal=   None    Shift=    0.000
 Gap=     0.164 Goal=   None    Shift=    0.000
 RMSDP=2.60D-04 MaxDP=2.34D-02 DE=-3.76D-04 OVMax= 1.78D-02

 Cycle  23  Pass 1  IDiag  1:
 RMSU=  1.62D-04    CP:  9.99D-01  1.27D+00
 E= -732.197681881402     Delta-E=       -0.000123443918 Rises=F Damp=F
 DIIS: error= 1.04D-04 at cycle  23 NSaved=  20.
 NSaved=20 IEnMin=20 EnMin= -732.197681881402     IErMin=20 ErrMin= 1.04D-04
 ErrMax= 1.04D-04  0.00D+00 EMaxC= 1.00D-01 BMatC= 1.25D-05 BMatP= 1.59D-05
 IDIUse=3 WtCom= 9.99D-01 WtEn= 1.04D-03
 Coeff-Com:  0.449D-03-0.624D-03-0.480D-02 0.483D-03 0.226D-02 0.203D-01
 Coeff-Com:  0.551D-01-0.869D-01-0.615D+00 0.203D+00 0.864D+00 0.227D+00
 Coeff-Com: -0.104D+01-0.254D+00 0.684D+00 0.110D+01-0.115D+01-0.110D+01
 Coeff-Com:  0.559D+00 0.154D+01
 Coeff-En:   0.000D+00 0.000D+00 0.000D+00 0.000D+00 0.000D+00 0.000D+00
 Coeff-En:   0.000D+00 0.000D+00 0.000D+00 0.000D+00 0.000D+00 0.000D+00
 Coeff-En:   0.000D+00 0.000D+00 0.000D+00 0.000D+00 0.000D+00 0.000D+00
 Coeff-En:   0.000D+00 0.100D+01
 Coeff:      0.449D-03-0.623D-03-0.479D-02 0.482D-03 0.226D-02 0.203D-01
 Coeff:      0.551D-01-0.868D-01-0.615D+00 0.203D+00 0.864D+00 0.226D+00
 Coeff:     -0.104D+01-0.254D+00 0.683D+00 0.110D+01-0.115D+01-0.110D+01
 Coeff:      0.559D+00 0.154D+01
 Gap=     0.285 Goal=   None    Shift=    0.000
 Gap=     0.164 Goal=   None    Shift=    0.000
 RMSDP=4.01D-04 MaxDP=3.52D-02 DE=-1.23D-04 OVMax= 2.88D-02

 Cycle  24  Pass 1  IDiag  1:
 RMSU=  7.82D-05    CP:  9.98D-01  1.78D+00  1.70D+00
 E= -732.197880718814     Delta-E=       -0.000198837412 Rises=F Damp=F
 DIIS: error= 9.75D-05 at cycle  24 NSaved=  20.
 NSaved=20 IEnMin=20 EnMin= -732.197880718814     IErMin=20 ErrMin= 9.75D-05
 ErrMax= 9.75D-05  0.00D+00 EMaxC= 1.00D-01 BMatC= 1.08D-05 BMatP= 1.25D-05
 IDIUse=1 WtCom= 1.00D+00 WtEn= 0.00D+00
 Coeff-Com:  0.159D-03-0.369D-03-0.153D-02 0.105D-01-0.275D-02-0.422D-01
 Coeff-Com: -0.214D-01 0.714D-01 0.921D-01-0.551D-01 0.650D-01 0.638D-01
 Coeff-Com: -0.132D+00-0.233D+00 0.236D+00 0.108D+01-0.178D+01 0.273D+00
 Coeff-Com: -0.877D+00 0.225D+01
 Coeff:      0.159D-03-0.369D-03-0.153D-02 0.105D-01-0.275D-02-0.422D-01
 Coeff:     -0.214D-01 0.714D-01 0.921D-01-0.551D-01 0.650D-01 0.638D-01
 Coeff:     -0.132D+00-0.233D+00 0.236D+00 0.108D+01-0.178D+01 0.273D+00
 Coeff:     -0.877D+00 0.225D+01
 Gap=     0.285 Goal=   None    Shift=    0.000
 Gap=     0.164 Goal=   None    Shift=    0.000
 RMSDP=7.40D-04 MaxDP=6.09D-02 DE=-1.99D-04 OVMax= 4.59D-02

 Cycle  25  Pass 1  IDiag  1:
 RMSU=  1.53D-04    CP:  9.96D-01  2.67D+00  3.00D+00  2.60D+00
 E= -732.198179172002     Delta-E=       -0.000298453188 Rises=F Damp=F
 DIIS: error= 1.14D-04 at cycle  25 NSaved=  20.
 NSaved=20 IEnMin=20 EnMin= -732.198179172002     IErMin=19 ErrMin= 9.75D-05
 ErrMax= 1.14D-04  0.00D+00 EMaxC= 1.00D-01 BMatC= 1.05D-05 BMatP= 1.08D-05
 IDIUse=1 WtCom= 1.00D+00 WtEn= 0.00D+00
 Coeff-Com:  0.452D-03 0.726D-03 0.297D-02-0.613D-02-0.279D-01-0.796D-02
 Coeff-Com:  0.835D-01 0.841D-01-0.106D+00 0.104D-01 0.142D+00-0.248D-01
 Coeff-Com: -0.226D+00-0.184D+00 0.105D+01-0.818D+00 0.480D+00-0.134D+01
 Coeff-Com:  0.959D+00 0.927D+00
 Coeff:      0.452D-03 0.726D-03 0.297D-02-0.613D-02-0.279D-01-0.796D-02
 Coeff:      0.835D-01 0.841D-01-0.106D+00 0.104D-01 0.142D+00-0.248D-01
 Coeff:     -0.226D+00-0.184D+00 0.105D+01-0.818D+00 0.480D+00-0.134D+01
 Coeff:      0.959D+00 0.927D+00
 Gap=     0.285 Goal=   None    Shift=    0.000
 Gap=     0.164 Goal=   None    Shift=    0.000
 RMSDP=1.36D-04 MaxDP=8.21D-03 DE=-2.98D-04 OVMax= 1.10D-02

 Cycle  26  Pass 1  IDiag  1:
 RMSU=  1.15D-04    CP:  9.96D-01  2.71D+00  3.00D+00  3.00D+00  1.30D+00
 E= -732.198236253440     Delta-E=       -0.000057081438 Rises=F Damp=F
 DIIS: error= 1.26D-04 at cycle  26 NSaved=  20.
 NSaved=20 IEnMin=20 EnMin= -732.198236253440     IErMin=18 ErrMin= 9.75D-05
 ErrMax= 1.26D-04  0.00D+00 EMaxC= 1.00D-01 BMatC= 1.36D-05 BMatP= 1.05D-05
 IDIUse=1 WtCom= 1.00D+00 WtEn= 0.00D+00
 Coeff-Com:  0.201D-02-0.845D-03-0.468D-02-0.179D-01-0.385D-02 0.150D-01
 Coeff-Com:  0.125D+00 0.122D-01-0.220D-01-0.317D-01-0.215D-01-0.418D-01
 Coeff-Com: -0.252D+00 0.603D+00-0.427D+00 0.117D+01-0.138D+01-0.363D-01
 Coeff-Com:  0.489D+00 0.821D+00
 Coeff:      0.201D-02-0.845D-03-0.468D-02-0.179D-01-0.385D-02 0.150D-01
 Coeff:      0.125D+00 0.122D-01-0.220D-01-0.317D-01-0.215D-01-0.418D-01
 Coeff:     -0.252D+00 0.603D+00-0.427D+00 0.117D+01-0.138D+01-0.363D-01
 Coeff:      0.489D+00 0.821D+00
 Gap=     0.285 Goal=   None    Shift=    0.000
 Gap=     0.164 Goal=   None    Shift=    0.000
 RMSDP=6.75D-05 MaxDP=4.53D-03 DE=-5.71D-05 OVMax= 7.81D-03

 Cycle  27  Pass 1  IDiag  1:
 RMSU=  4.58D-05    CP:  9.96D-01  2.75D+00  3.00D+00  3.00D+00  1.40D+00
                    CP:  1.34D+00
 E= -732.198283828150     Delta-E=       -0.000047574710 Rises=F Damp=F
 DIIS: error= 1.29D-04 at cycle  27 NSaved=  20.
 NSaved=20 IEnMin=20 EnMin= -732.198283828150     IErMin=17 ErrMin= 9.75D-05
 ErrMax= 1.29D-04  0.00D+00 EMaxC= 1.00D-01 BMatC= 1.29D-05 BMatP= 1.05D-05
 IDIUse=1 WtCom= 1.00D+00 WtEn= 0.00D+00
 Coeff-Com:  0.402D-03 0.599D-03-0.407D-02-0.337D-01-0.999D-01 0.239D+00
 Coeff-Com:  0.147D+00-0.847D-01-0.180D+00-0.924D-02 0.131D+00-0.166D+00
 Coeff-Com:  0.377D+00-0.770D+00 0.113D+01-0.103D+01 0.364D+00 0.148D+00
 Coeff-Com: -0.108D+01 0.193D+01
 Coeff:      0.402D-03 0.599D-03-0.407D-02-0.337D-01-0.999D-01 0.239D+00
 Coeff:      0.147D+00-0.847D-01-0.180D+00-0.924D-02 0.131D+00-0.166D+00
 Coeff:      0.377D+00-0.770D+00 0.113D+01-0.103D+01 0.364D+00 0.148D+00
 Coeff:     -0.108D+01 0.193D+01
 Gap=     0.285 Goal=   None    Shift=    0.000
 Gap=     0.164 Goal=   None    Shift=    0.000
 RMSDP=2.20D-04 MaxDP=1.64D-02 DE=-4.76D-05 OVMax= 1.72D-02

 Cycle  28  Pass 1  IDiag  1:
 RMSU=  6.56D-05    CP:  9.95D-01  3.00D+00  3.00D+00  3.00D+00  1.88D+00
                    CP:  1.73D+00  1.89D+00
 E= -732.198379000275     Delta-E=       -0.000095172125 Rises=F Damp=F
 DIIS: error= 1.29D-04 at cycle  28 NSaved=  20.
 NSaved=20 IEnMin=20 EnMin= -732.198379000275     IErMin=16 ErrMin= 9.75D-05
 ErrMax= 1.29D-04  0.00D+00 EMaxC= 1.00D-01 BMatC= 1.08D-05 BMatP= 1.05D-05
 IDIUse=1 WtCom= 1.00D+00 WtEn= 0.00D+00
 Coeff-Com:  0.246D-02 0.774D-02-0.520D-01-0.160D+00 0.150D+00 0.232D+00
 Coeff-Com:  0.306D-01-0.222D+00-0.673D-01 0.702D-01 0.341D+00 0.230D+00
 Coeff-Com: -0.102D+01-0.186D+00 0.145D+00 0.128D+01-0.190D-01-0.372D+01
 Coeff-Com:  0.181D+01 0.214D+01
 Coeff:      0.246D-02 0.774D-02-0.520D-01-0.160D+00 0.150D+00 0.232D+00
 Coeff:      0.306D-01-0.222D+00-0.673D-01 0.702D-01 0.341D+00 0.230D+00
 Coeff:     -0.102D+01-0.186D+00 0.145D+00 0.128D+01-0.190D-01-0.372D+01
 Coeff:      0.181D+01 0.214D+01
 Gap=     0.285 Goal=   None    Shift=    0.000
 Gap=     0.164 Goal=   None    Shift=    0.000
 RMSDP=2.55D-04 MaxDP=1.61D-02 DE=-9.52D-05 OVMax= 2.39D-02

 Cycle  29  Pass 1  IDiag  1:
 RMSU=  1.25D-04    CP:  9.94D-01  3.00D+00  3.00D+00  3.00D+00  2.34D+00
                    CP:  3.00D+00  3.00D+00  2.65D+00
 E= -732.198516208874     Delta-E=       -0.000137208599 Rises=F Damp=F
 DIIS: error= 1.35D-04 at cycle  29 NSaved=  20.
 NSaved=20 IEnMin=20 EnMin= -732.198516208874     IErMin=15 ErrMin= 9.75D-05
 ErrMax= 1.35D-04  0.00D+00 EMaxC= 1.00D-01 BMatC= 1.10D-05 BMatP= 1.05D-05
 IDIUse=1 WtCom= 1.00D+00 WtEn= 0.00D+00
 Coeff-Com: -0.407D-02-0.279D-01-0.951D-03 0.650D-01 0.154D-02-0.136D-01
 Coeff-Com:  0.724D-01-0.451D-02-0.164D+00 0.141D+00 0.484D+00-0.760D+00
 Coeff-Com: -0.398D+00-0.586D-01 0.146D+01 0.173D+00-0.313D+01 0.764D+00
 Coeff-Com:  0.167D+01 0.730D+00
 Coeff:     -0.407D-02-0.279D-01-0.951D-03 0.650D-01 0.154D-02-0.136D-01
 Coeff:      0.724D-01-0.451D-02-0.164D+00 0.141D+00 0.484D+00-0.760D+00
 Coeff:     -0.398D+00-0.586D-01 0.146D+01 0.173D+00-0.313D+01 0.764D+00
 Coeff:      0.167D+01 0.730D+00
 Gap=     0.285 Goal=   None    Shift=    0.000
 Gap=     0.164 Goal=   None    Shift=    0.000
 RMSDP=1.41D-04 MaxDP=9.05D-03 DE=-1.37D-04 OVMax= 1.54D-02

 Cycle  30  Pass 1  IDiag  1:
 RMSU=  5.95D-05    CP:  9.94D-01  3.00D+00  3.00D+00  3.00D+00  2.58D+00
                    CP:  3.00D+00  3.00D+00  3.00D+00  1.91D+00
 E= -732.198595962492     Delta-E=       -0.000079753618 Rises=F Damp=F
 DIIS: error= 1.31D-04 at cycle  30 NSaved=  20.
 NSaved=20 IEnMin=20 EnMin= -732.198595962492     IErMin=14 ErrMin= 9.75D-05
 ErrMax= 1.31D-04  0.00D+00 EMaxC= 1.00D-01 BMatC= 8.73D-06 BMatP= 1.05D-05
 IDIUse=1 WtCom= 1.00D+00 WtEn= 0.00D+00
 Coeff-Com: -0.250D-01-0.298D-01 0.821D-01 0.310D-01-0.242D-01 0.293D-01
 Coeff-Com: -0.185D-02-0.116D+00 0.615D-01 0.390D+00-0.471D+00-0.167D+00
 Coeff-Com: -0.247D+00 0.889D+00 0.257D+00-0.175D+01 0.482D+00 0.810D+00
 Coeff-Com: -0.193D+00 0.991D+00
 Coeff:     -0.250D-01-0.298D-01 0.821D-01 0.310D-01-0.242D-01 0.293D-01
 Coeff:     -0.185D-02-0.116D+00 0.615D-01 0.390D+00-0.471D+00-0.167D+00
 Coeff:     -0.247D+00 0.889D+00 0.257D+00-0.175D+01 0.482D+00 0.810D+00
 Coeff:     -0.193D+00 0.991D+00
 Gap=     0.285 Goal=   None    Shift=    0.000
 Gap=     0.164 Goal=   None    Shift=    0.000
 RMSDP=4.55D-05 MaxDP=2.97D-03 DE=-7.98D-05 OVMax= 5.36D-03

 Cycle  31  Pass 1  IDiag  1:
 RMSU=  2.33D-05    CP:  9.94D-01  3.00D+00  3.00D+00  3.00D+00  2.65D+00
                    CP:  3.00D+00  3.00D+00  3.00D+00  2.02D+00  1.58D+00
 E= -732.198622427776     Delta-E=       -0.000026465284 Rises=F Damp=F
 DIIS: error= 1.32D-04 at cycle  31 NSaved=  20.
 NSaved=20 IEnMin=20 EnMin= -732.198622427776     IErMin=13 ErrMin= 9.75D-05
 ErrMax= 1.32D-04  0.00D+00 EMaxC= 1.00D-01 BMatC= 8.69D-06 BMatP= 8.73D-06
 IDIUse=1 WtCom= 1.00D+00 WtEn= 0.00D+00
 Coeff-Com: -0.738D-02 0.187D-01 0.836D-02 0.145D-01 0.259D-01-0.155D-01
 Coeff-Com: -0.103D+00 0.808D-01 0.291D+00-0.375D+00-0.696D-01-0.266D+00
 Coeff-Com:  0.599D+00 0.285D+00-0.106D+01 0.463D+00 0.379D+00-0.833D+00
 Coeff-Com:  0.556D+00 0.100D+01
 Coeff:     -0.738D-02 0.187D-01 0.836D-02 0.145D-01 0.259D-01-0.155D-01
 Coeff:     -0.103D+00 0.808D-01 0.291D+00-0.375D+00-0.696D-01-0.266D+00
 Coeff:      0.599D+00 0.285D+00-0.106D+01 0.463D+00 0.379D+00-0.833D+00
 Coeff:      0.556D+00 0.100D+01
 Gap=     0.285 Goal=   None    Shift=    0.000
 Gap=     0.164 Goal=   None    Shift=    0.000
 RMSDP=6.21D-05 MaxDP=4.46D-03 DE=-2.65D-05 OVMax= 7.16D-03

 Cycle  32  Pass 1  IDiag  1:
 RMSU=  1.69D-05    CP:  9.94D-01  3.00D+00  3.00D+00  3.00D+00  2.77D+00
                    CP:  3.00D+00  3.00D+00  3.00D+00  2.40D+00  2.06D+00
                    CP:  1.26D+00
 E= -732.198656325768     Delta-E=       -0.000033897991 Rises=F Damp=F
 DIIS: error= 1.32D-04 at cycle  32 NSaved=  20.
 NSaved=20 IEnMin=20 EnMin= -732.198656325768     IErMin=12 ErrMin= 9.75D-05
 ErrMax= 1.32D-04  0.00D+00 EMaxC= 1.00D-01 BMatC= 8.27D-06 BMatP= 8.69D-06
 IDIUse=1 WtCom= 1.00D+00 WtEn= 0.00D+00
 Coeff-Com:  0.220D-01-0.780D-02 0.125D-02 0.464D-01-0.270D-02-0.110D+00
 Coeff-Com:  0.610D-01 0.293D+00-0.356D+00-0.950D-01-0.251D+00 0.614D+00
 Coeff-Com:  0.275D+00-0.111D+01 0.460D+00 0.427D+00-0.740D+00 0.449D+00
 Coeff-Com:  0.729D+00 0.291D+00
 Coeff:      0.220D-01-0.780D-02 0.125D-02 0.464D-01-0.270D-02-0.110D+00
 Coeff:      0.610D-01 0.293D+00-0.356D+00-0.950D-01-0.251D+00 0.614D+00
 Coeff:      0.275D+00-0.111D+01 0.460D+00 0.427D+00-0.740D+00 0.449D+00
 Coeff:      0.729D+00 0.291D+00
 Gap=     0.285 Goal=   None    Shift=    0.000
 Gap=     0.164 Goal=   None    Shift=    0.000
 RMSDP=1.59D-05 MaxDP=1.35D-03 DE=-3.39D-05 OVMax= 1.52D-03

 Cycle  33  Pass 1  IDiag  1:
 RMSU=  2.84D-06    CP:  9.94D-01  3.00D+00  3.00D+00  3.00D+00  2.81D+00
                    CP:  3.00D+00  3.00D+00  3.00D+00  2.48D+00  2.16D+00
                    CP:  1.36D+00  1.33D+00
 E= -732.198663453547     Delta-E=       -0.000007127780 Rises=F Damp=F
 DIIS: error= 1.32D-04 at cycle  33 NSaved=  20.
 NSaved=20 IEnMin=20 EnMin= -732.198663453547     IErMin=11 ErrMin= 9.75D-05
 ErrMax= 1.32D-04  0.00D+00 EMaxC= 1.00D-01 BMatC= 8.25D-06 BMatP= 8.27D-06
 IDIUse=1 WtCom= 1.00D+00 WtEn= 0.00D+00
 Large coefficients: NSaved= 20 BigCof=   10.39 CofMax=   10.00 Det=-9.49D-10
 Inversion failed.  Reducing to 19 matrices.
 Large coefficients: NSaved= 19 BigCof=   10.09 CofMax=   10.00 Det=-9.65D-10
 Inversion failed.  Reducing to 18 matrices.
 Large coefficients: NSaved= 18 BigCof=   10.18 CofMax=   10.00 Det=-9.83D-10
 Inversion failed.  Reducing to 17 matrices.
 Large coefficients: NSaved= 17 BigCof=   10.64 CofMax=   10.00 Det=-1.01D-09
 Inversion failed.  Reducing to 16 matrices.
 Large coefficients: NSaved= 16 BigCof=   10.67 CofMax=   10.00 Det=-1.01D-09
 Inversion failed.  Reducing to 15 matrices.
 Large coefficients: NSaved= 15 BigCof=   10.67 CofMax=   10.00 Det=-1.01D-09
 Inversion failed.  Reducing to 14 matrices.
 Coeff-Com:  0.221D+00-0.165D+00-0.177D+00-0.242D+00 0.427D+00 0.517D+00
 Coeff-Com: -0.768D+00 0.397D+00 0.884D-01-0.184D+01 0.737D+00 0.337D+01
 Coeff-Com:  0.830D+01-0.986D+01
 Coeff:      0.221D+00-0.165D+00-0.177D+00-0.242D+00 0.427D+00 0.517D+00
 Coeff:     -0.768D+00 0.397D+00 0.884D-01-0.184D+01 0.737D+00 0.337D+01
 Coeff:      0.830D+01-0.986D+01
 Gap=     0.285 Goal=   None    Shift=    0.000
 Gap=     0.164 Goal=   None    Shift=    0.000
 RMSDP=1.65D-04 MaxDP=1.26D-02 DE=-7.13D-06 OVMax= 1.47D-02

 Cycle  34  Pass 1  IDiag  1:
 RMSU=  3.83D-05    CP:  9.94D-01  3.00D+00  3.00D+00  3.00D+00  2.29D+00
                    CP:  3.00D+00  3.00D+00  3.00D+00  1.91D+00  1.04D+00
                    CP: -1.29D+00 -1.86D+00 -3.00D+00
 E= -732.198596580666     Delta-E=        0.000066872881 Rises=F Damp=F
 DIIS: error= 1.24D-04 at cycle  34 NSaved=  15.
 NSaved=15 IEnMin=14 EnMin= -732.198663453547     IErMin= 5 ErrMin= 9.75D-05
 ErrMax= 1.24D-04  0.00D+00 EMaxC= 1.00D-01 BMatC= 7.33D-06 BMatP= 8.25D-06
 IDIUse=1 WtCom= 1.00D+00 WtEn= 0.00D+00
 Coeff-Com:  0.714D-01 0.457D-01-0.274D+00-0.263D-01 0.344D-01 0.367D+00
 Coeff-Com: -0.629D-01 0.834D-01-0.221D-01-0.997D+00-0.593D-02 0.210D+01
 Coeff-Com:  0.781D+01-0.978D+01 0.166D+01
 Coeff:      0.714D-01 0.457D-01-0.274D+00-0.263D-01 0.344D-01 0.367D+00
 Coeff:     -0.629D-01 0.834D-01-0.221D-01-0.997D+00-0.593D-02 0.210D+01
 Coeff:      0.781D+01-0.978D+01 0.166D+01
 Gap=     0.285 Goal=   None    Shift=    0.000
 Gap=     0.164 Goal=   None    Shift=    0.000
 RMSDP=1.51D-04 MaxDP=8.89D-03 DE= 6.69D-05 OVMax= 1.76D-02

 Cycle  35  Pass 1  IDiag  1:
 RMSU=  3.76D-05    CP:  9.95D-01  3.00D+00  3.00D+00  3.00D+00  1.90D+00
                    CP:  2.24D+00  3.00D+00  3.00D+00  1.48D+00  4.28D-01
                    CP: -2.44D+00 -3.00D+00  3.00D+00  4.22D-01
 E= -732.198518949061     Delta-E=        0.000077631606 Rises=F Damp=F
 DIIS: error= 1.18D-04 at cycle  35 NSaved=  16.
 NSaved=16 IEnMin=14 EnMin= -732.198663453547     IErMin= 5 ErrMin= 9.75D-05
 ErrMax= 1.18D-04  0.00D+00 EMaxC= 1.00D-01 BMatC= 7.20D-06 BMatP= 7.33D-06
 IDIUse=1 WtCom= 1.00D+00 WtEn= 0.00D+00
 Coeff-Com: -0.118D+00 0.234D+00-0.435D+00 0.363D+00 0.824D-01-0.335D+00
 Coeff-Com: -0.336D+00 0.360D-01 0.478D+00 0.162D+01-0.146D+01-0.245D+01
 Coeff-Com: -0.398D+01 0.477D+01 0.102D+01 0.151D+01
 Coeff:     -0.118D+00 0.234D+00-0.435D+00 0.363D+00 0.824D-01-0.335D+00
 Coeff:     -0.336D+00 0.360D-01 0.478D+00 0.162D+01-0.146D+01-0.245D+01
 Coeff:     -0.398D+01 0.477D+01 0.102D+01 0.151D+01
 Gap=     0.285 Goal=   None    Shift=    0.000
 Gap=     0.164 Goal=   None    Shift=    0.000
 RMSDP=1.34D-04 MaxDP=9.39D-03 DE= 7.76D-05 OVMax= 1.55D-02

 Cycle  36  Pass 1  IDiag  1:
 RMSU=  2.38D-05    CP:  9.95D-01  3.00D+00  3.00D+00  3.00D+00  1.55D+00
                    CP:  1.66D+00  3.00D+00  2.51D+00  9.28D-01  1.80D-01
                    CP: -3.00D+00 -3.00D+00  3.00D+00 -5.34D-02  2.23D+00
 E= -732.198449113775     Delta-E=        0.000069835286 Rises=F Damp=F
 DIIS: error= 1.15D-04 at cycle  36 NSaved=  17.
 NSaved=17 IEnMin=14 EnMin= -732.198663453547     IErMin= 5 ErrMin= 9.75D-05
 ErrMax= 1.15D-04  0.00D+00 EMaxC= 1.00D-01 BMatC= 7.07D-06 BMatP= 7.20D-06
 IDIUse=1 WtCom= 1.00D+00 WtEn= 0.00D+00
 Coeff-Com: -0.144D+00 0.255D+00-0.454D+00 0.406D+00 0.101D+00-0.196D+00
 Coeff-Com: -0.524D+00-0.109D-01 0.559D+00 0.129D+01-0.121D+01-0.210D+01
 Coeff-Com: -0.355D+01 0.487D+01 0.977D-01 0.115D+00 0.149D+01
 Coeff:     -0.144D+00 0.255D+00-0.454D+00 0.406D+00 0.101D+00-0.196D+00
 Coeff:     -0.524D+00-0.109D-01 0.559D+00 0.129D+01-0.121D+01-0.210D+01
 Coeff:     -0.355D+01 0.487D+01 0.977D-01 0.115D+00 0.149D+01
 Gap=     0.285 Goal=   None    Shift=    0.000
 Gap=     0.164 Goal=   None    Shift=    0.000
 RMSDP=1.00D-04 MaxDP=6.59D-03 DE= 6.98D-05 OVMax= 1.32D-02

 Cycle  37  Pass 1  IDiag  1:
 RMSU=  2.08D-05    CP:  9.96D-01  3.00D+00  3.00D+00  3.00D+00  1.35D+00
                    CP:  1.24D+00  3.00D+00  2.10D+00  5.33D-01 -1.14D-01
                    CP: -3.00D+00 -3.00D+00  3.00D+00 -6.51D-01  3.00D+00
                    CP:  2.04D+00
 E= -732.198390659643     Delta-E=        0.000058454132 Rises=F Damp=F
 DIIS: error= 1.11D-04 at cycle  37 NSaved=  18.
 NSaved=18 IEnMin=14 EnMin= -732.198663453547     IErMin= 5 ErrMin= 9.75D-05
 ErrMax= 1.11D-04  0.00D+00 EMaxC= 1.00D-01 BMatC= 6.92D-06 BMatP= 7.07D-06
 IDIUse=1 WtCom= 1.00D+00 WtEn= 0.00D+00
 Coeff-Com:  0.861D-01 0.621D-01-0.373D+00 0.232D-01 0.160D+00 0.472D+00
 Coeff-Com: -0.187D+00-0.175D+00 0.199D-01-0.111D+01 0.661D+00 0.196D+01
 Coeff-Com:  0.582D+01-0.708D+01 0.163D+00-0.175D+01 0.347D+00 0.190D+01
 Coeff:      0.861D-01 0.621D-01-0.373D+00 0.232D-01 0.160D+00 0.472D+00
 Coeff:     -0.187D+00-0.175D+00 0.199D-01-0.111D+01 0.661D+00 0.196D+01
 Coeff:      0.582D+01-0.708D+01 0.163D+00-0.175D+01 0.347D+00 0.190D+01
 Gap=     0.285 Goal=   None    Shift=    0.000
 Gap=     0.164 Goal=   None    Shift=    0.000
 RMSDP=1.81D-04 MaxDP=1.11D-02 DE= 5.85D-05 OVMax= 2.45D-02

 Cycle  38  Pass 1  IDiag  1:
 RMSU=  6.17D-05    CP:  9.96D-01  3.00D+00  3.00D+00  3.00D+00  9.57D-01
                    CP:  5.41D-01  2.65D+00  1.56D+00 -2.10D-01 -5.12D-01
                    CP: -3.00D+00 -3.00D+00  3.00D+00 -1.54D+00  3.00D+00
                    CP:  3.00D+00  3.00D+00
 E= -732.198286216199     Delta-E=        0.000104443444 Rises=F Damp=F
 DIIS: error= 1.06D-04 at cycle  38 NSaved=  19.
 NSaved=19 IEnMin=14 EnMin= -732.198663453547     IErMin= 5 ErrMin= 9.75D-05
 ErrMax= 1.06D-04  0.00D+00 EMaxC= 1.00D-01 BMatC= 6.76D-06 BMatP= 6.92D-06
 IDIUse=1 WtCom= 1.00D+00 WtEn= 0.00D+00
 Large coefficients: NSaved= 19 BigCof=   13.62 CofMax=   10.00 Det=-3.67D-10
 Inversion failed.  Reducing to 18 matrices.
 Coeff-Com:  0.202D+00-0.158D+00-0.136D+00-0.141D+00 0.379D+00 0.354D+00
 Coeff-Com: -0.172D+00-0.199D+00-0.124D+01 0.799D+00 0.101D+01 0.624D+01
 Coeff-Com: -0.756D+01 0.155D+01-0.311D+00-0.254D+01 0.107D+01 0.185D+01
 Coeff:      0.202D+00-0.158D+00-0.136D+00-0.141D+00 0.379D+00 0.354D+00
 Coeff:     -0.172D+00-0.199D+00-0.124D+01 0.799D+00 0.101D+01 0.624D+01
 Coeff:     -0.756D+01 0.155D+01-0.311D+00-0.254D+01 0.107D+01 0.185D+01
 Gap=     0.285 Goal=   None    Shift=    0.000
 Gap=     0.164 Goal=   None    Shift=    0.000
 RMSDP=2.43D-04 MaxDP=1.54D-02 DE= 1.04D-04 OVMax= 3.23D-02

 Cycle  39  Pass 1  IDiag  1:
 RMSU=  8.30D-05    CP:  9.97D-01  2.83D+00  2.67D+00  3.00D+00  5.32D-01
                    CP:  1.01D-01  9.38D-01  8.92D-01 -3.71D-01 -6.16D-01
                    CP: -3.00D+00 -3.00D+00  3.00D+00 -2.73D+00  3.00D+00
                    CP:  3.00D+00  3.00D+00  2.58D+00
 E= -732.198157028747     Delta-E=        0.000129187451 Rises=F Damp=F
 DIIS: error= 9.77D-05 at cycle  39 NSaved=  19.
 NSaved=19 IEnMin=13 EnMin= -732.198663453547     IErMin= 4 ErrMin= 9.75D-05
 ErrMax= 9.77D-05  0.00D+00 EMaxC= 1.00D-01 BMatC= 6.56D-06 BMatP= 6.76D-06
 IDIUse=1 WtCom= 1.00D+00 WtEn= 0.00D+00
 Coeff-Com:  0.219D+00 0.329D-01-0.418D+00-0.214D+00 0.649D+00 0.587D-01
 Coeff-Com:  0.229D-01-0.843D-02-0.150D+01 0.604D+00 0.917D+00 0.748D+01
 Coeff-Com: -0.817D+01 0.130D+01-0.207D-01-0.952D+00-0.690D+00-0.266D+00
 Coeff-Com:  0.195D+01
 Coeff:      0.219D+00 0.329D-01-0.418D+00-0.214D+00 0.649D+00 0.587D-01
 Coeff:      0.229D-01-0.843D-02-0.150D+01 0.604D+00 0.917D+00 0.748D+01
 Coeff:     -0.817D+01 0.130D+01-0.207D-01-0.952D+00-0.690D+00-0.266D+00
 Coeff:      0.195D+01
 Gap=     0.285 Goal=   None    Shift=    0.000
 Gap=     0.164 Goal=   None    Shift=    0.000
 RMSDP=1.37D-04 MaxDP=1.06D-02 DE= 1.29D-04 OVMax= 2.11D-02

 Cycle  40  Pass 1  IDiag  1:
 RMSU=  5.61D-05    CP:  9.97D-01  2.75D+00  2.63D+00  3.00D+00  3.79D-01
                    CP:  1.53D-01 -2.02D-01  5.35D-01 -4.70D-01 -6.99D-01
                    CP: -3.00D+00 -3.00D+00  3.00D+00 -3.00D+00  3.00D+00
                    CP:  3.00D+00  3.00D+00  3.00D+00  1.84D+00
 E= -732.198086078798     Delta-E=        0.000070949950 Rises=F Damp=F
 DIIS: error= 9.58D-05 at cycle  40 NSaved=  20.
 NSaved=20 IEnMin=13 EnMin= -732.198663453547     IErMin=20 ErrMin= 9.58D-05
 ErrMax= 9.58D-05  0.00D+00 EMaxC= 1.00D-01 BMatC= 6.40D-06 BMatP= 6.56D-06
 IDIUse=1 WtCom= 1.00D+00 WtEn= 0.00D+00
 Coeff-Com: -0.204D+00 0.300D+00-0.339D+00 0.213D+00 0.341D+00-0.936D+00
 Coeff-Com:  0.647D+00 0.210D+00-0.321D+00 0.351D+00-0.169D+00-0.198D+01
 Coeff-Com:  0.191D+01-0.810D+00-0.918D-01 0.446D+01-0.197D+01-0.430D+01
 Coeff-Com:  0.114D+01 0.255D+01
 Coeff:     -0.204D+00 0.300D+00-0.339D+00 0.213D+00 0.341D+00-0.936D+00
 Coeff:      0.647D+00 0.210D+00-0.321D+00 0.351D+00-0.169D+00-0.198D+01
 Coeff:      0.191D+01-0.810D+00-0.918D-01 0.446D+01-0.197D+01-0.430D+01
 Coeff:      0.114D+01 0.255D+01
 Gap=     0.285 Goal=   None    Shift=    0.000
 Gap=     0.164 Goal=   None    Shift=    0.000
 RMSDP=3.48D-04 MaxDP=2.57D-02 DE= 7.09D-05 OVMax= 4.74D-02

 Cycle  41  Pass 1  IDiag  1:
 Restarting incremental Fock formation.
 E= -732.197937970595     Delta-E=        0.000148108203 Rises=F Damp=F
 DIIS: error= 8.41D-05 at cycle  41 NSaved=  20.
 NSaved=20 IEnMin=12 EnMin= -732.198663453547     IErMin=20 ErrMin= 8.41D-05
 ErrMax= 8.41D-05  0.00D+00 EMaxC= 1.00D-01 BMatC= 7.10D-06 BMatP= 6.40D-06
 IDIUse=1 WtCom= 1.00D+00 WtEn= 0.00D+00
 Coeff-Com: -0.172D+00 0.214D+00 0.645D-01-0.273D+00 0.480D+00 0.347D+00
 Coeff-Com: -0.631D+00 0.290D+00-0.762D+00 0.305D+00-0.790D+01 0.816D+01
 Coeff-Com: -0.147D+01 0.667D+00 0.373D+01-0.161D+01-0.308D+01-0.150D-01
 Coeff-Com:  0.170D+01 0.960D+00
 Coeff:     -0.172D+00 0.214D+00 0.645D-01-0.273D+00 0.480D+00 0.347D+00
 Coeff:     -0.631D+00 0.290D+00-0.762D+00 0.305D+00-0.790D+01 0.816D+01
 Coeff:     -0.147D+01 0.667D+00 0.373D+01-0.161D+01-0.308D+01-0.150D-01
 Coeff:      0.170D+01 0.960D+00
 Gap=     0.285 Goal=   None    Shift=    0.000
 Gap=     0.164 Goal=   None    Shift=    0.000
 RMSDP=3.63D-04 MaxDP=2.42D-02 DE= 1.48D-04 OVMax= 4.51D-02

 Cycle  42  Pass 1  IDiag  1:
 RMSU=  3.60D-04    CP:  1.00D+00
 E= -732.197812593457     Delta-E=        0.000125377138 Rises=F Damp=F
 DIIS: error= 7.19D-05 at cycle  42 NSaved=  20.
 NSaved=20 IEnMin=11 EnMin= -732.198663453547     IErMin=20 ErrMin= 7.19D-05
 ErrMax= 7.19D-05  0.00D+00 EMaxC= 1.00D-01 BMatC= 5.42D-06 BMatP= 6.40D-06
 IDIUse=1 WtCom= 1.00D+00 WtEn= 0.00D+00
 Coeff-Com:  0.176D+00-0.532D+00-0.401D-01 0.252D+01 0.264D+00-0.226D+01
 Coeff-Com: -0.285D+01 0.163D+00 0.606D+01-0.325D+01 0.175D+01-0.229D+01
 Coeff-Com: -0.209D+01 0.336D+01 0.936D+00-0.157D+01-0.199D+01 0.516D+00
 Coeff-Com:  0.722D+00 0.141D+01
 Coeff:      0.176D+00-0.532D+00-0.401D-01 0.252D+01 0.264D+00-0.226D+01
 Coeff:     -0.285D+01 0.163D+00 0.606D+01-0.325D+01 0.175D+01-0.229D+01
 Coeff:     -0.209D+01 0.336D+01 0.936D+00-0.157D+01-0.199D+01 0.516D+00
 Coeff:      0.722D+00 0.141D+01
 Gap=     0.285 Goal=   None    Shift=    0.000
 Gap=     0.164 Goal=   None    Shift=    0.000
 RMSDP=4.06D-04 MaxDP=3.76D-02 DE= 1.25D-04 OVMax= 6.23D-02

 Cycle  43  Pass 1  IDiag  1:
 RMSU=  2.28D-04    CP:  1.00D+00  1.93D+00
 E= -732.197689899243     Delta-E=        0.000122694215 Rises=F Damp=F
 DIIS: error= 5.95D-05 at cycle  43 NSaved=  20.
 NSaved=20 IEnMin=10 EnMin= -732.198663453547     IErMin=20 ErrMin= 5.95D-05
 ErrMax= 5.95D-05  0.00D+00 EMaxC= 1.00D-01 BMatC= 4.48D-06 BMatP= 5.42D-06
 IDIUse=1 WtCom= 1.00D+00 WtEn= 0.00D+00
 Coeff-Com: -0.609D-01 0.117D+00 0.954D+00-0.428D+00-0.963D+00-0.993D+00
 Coeff-Com:  0.149D+01 0.317D+01-0.365D+01 0.196D+01-0.198D+01-0.254D+01
 Coeff-Com:  0.247D+01 0.206D+01-0.433D+00-0.184D+01 0.264D+00 0.184D+00
 Coeff-Com:  0.176D+00 0.105D+01
 Coeff:     -0.609D-01 0.117D+00 0.954D+00-0.428D+00-0.963D+00-0.993D+00
 Coeff:      0.149D+01 0.317D+01-0.365D+01 0.196D+01-0.198D+01-0.254D+01
 Coeff:      0.247D+01 0.206D+01-0.433D+00-0.184D+01 0.264D+00 0.184D+00
 Coeff:      0.176D+00 0.105D+01
 Gap=     0.285 Goal=   None    Shift=    0.000
 Gap=     0.164 Goal=   None    Shift=    0.000
 RMSDP=1.20D-04 MaxDP=8.80D-03 DE= 1.23D-04 OVMax= 1.29D-02

 Cycle  44  Pass 1  IDiag  1:
 RMSU=  6.29D-05    CP:  1.00D+00  2.09D+00  1.37D+00
 E= -732.197683122366     Delta-E=        0.000006776877 Rises=F Damp=F
 DIIS: error= 5.69D-05 at cycle  44 NSaved=  20.
 NSaved=20 IEnMin=10 EnMin= -732.198663453547     IErMin=20 ErrMin= 5.69D-05
 ErrMax= 5.69D-05  0.00D+00 EMaxC= 1.00D-01 BMatC= 3.68D-06 BMatP= 4.48D-06
 IDIUse=1 WtCom= 1.00D+00 WtEn= 0.00D+00
 Coeff-Com: -0.249D+00 0.288D+00 0.115D+01-0.509D+00-0.506D+00-0.101D+01
 Coeff-Com:  0.626D+00 0.763D+00-0.147D+01 0.101D+01 0.746D+00-0.903D+00
 Coeff-Com: -0.138D+01 0.123D+01 0.143D+01-0.101D+01-0.570D+00-0.377D-01
 Coeff-Com: -0.125D+00 0.153D+01
 Coeff:     -0.249D+00 0.288D+00 0.115D+01-0.509D+00-0.506D+00-0.101D+01
 Coeff:      0.626D+00 0.763D+00-0.147D+01 0.101D+01 0.746D+00-0.903D+00
 Coeff:     -0.138D+01 0.123D+01 0.143D+01-0.101D+01-0.570D+00-0.377D-01
 Coeff:     -0.125D+00 0.153D+01
 Gap=     0.285 Goal=   None    Shift=    0.000
 Gap=     0.165 Goal=   None    Shift=    0.000
 RMSDP=2.55D-04 MaxDP=2.48D-02 DE= 6.78D-06 OVMax= 3.73D-02

 Cycle  45  Pass 1  IDiag  1:
 RMSU=  5.35D-05    CP:  1.00D+00  2.45D+00  2.30D+00  1.33D+00
 E= -732.197642317553     Delta-E=        0.000040804813 Rises=F Damp=F
 DIIS: error= 5.19D-05 at cycle  45 NSaved=  20.
 NSaved=20 IEnMin=10 EnMin= -732.198663453547     IErMin=20 ErrMin= 5.19D-05
 ErrMax= 5.19D-05  0.00D+00 EMaxC= 1.00D-01 BMatC= 3.31D-06 BMatP= 3.68D-06
 IDIUse=1 WtCom= 1.00D+00 WtEn= 0.00D+00
 Coeff-Com: -0.219D+00 0.481D+00-0.180D+00-0.620D+00 0.572D+00-0.321D+00
 Coeff-Com:  0.916D+00-0.779D+00 0.348D+01-0.396D+01 0.152D+01-0.725D+00
 Coeff-Com: -0.206D+01 0.123D+01 0.161D+01-0.259D+00-0.356D+00-0.796D+00
 Coeff-Com:  0.476D+00 0.983D+00
 Coeff:     -0.219D+00 0.481D+00-0.180D+00-0.620D+00 0.572D+00-0.321D+00
 Coeff:      0.916D+00-0.779D+00 0.348D+01-0.396D+01 0.152D+01-0.725D+00
 Coeff:     -0.206D+01 0.123D+01 0.161D+01-0.259D+00-0.356D+00-0.796D+00
 Coeff:      0.476D+00 0.983D+00
 Gap=     0.285 Goal=   None    Shift=    0.000
 Gap=     0.165 Goal=   None    Shift=    0.000
 RMSDP=1.56D-04 MaxDP=1.09D-02 DE= 4.08D-05 OVMax= 1.59D-02

 Cycle  46  Pass 1  IDiag  1:
 RMSU=  1.74D-05    CP:  1.00D+00  2.50D+00  2.92D+00  2.24D+00  1.55D+00
 E= -732.197641802973     Delta-E=        0.000000514580 Rises=F Damp=F
 DIIS: error= 5.13D-05 at cycle  46 NSaved=  20.
 NSaved=20 IEnMin=10 EnMin= -732.198663453547     IErMin=20 ErrMin= 5.13D-05
 ErrMax= 5.13D-05  0.00D+00 EMaxC= 1.00D-01 BMatC= 3.03D-06 BMatP= 3.31D-06
 IDIUse=1 WtCom= 1.00D+00 WtEn= 0.00D+00
 Coeff-Com: -0.206D+00 0.528D+00-0.603D+00-0.659D+00 0.117D+01 0.279D+00
 Coeff-Com:  0.406D+00-0.290D+01 0.452D+01-0.433D+01 0.304D+01 0.548D+00
 Coeff-Com: -0.368D+01 0.311D+00 0.205D+01 0.599D+00-0.383D+00-0.109D+01
 Coeff-Com:  0.473D+00 0.928D+00
 Coeff:     -0.206D+00 0.528D+00-0.603D+00-0.659D+00 0.117D+01 0.279D+00
 Coeff:      0.406D+00-0.290D+01 0.452D+01-0.433D+01 0.304D+01 0.548D+00
 Coeff:     -0.368D+01 0.311D+00 0.205D+01 0.599D+00-0.383D+00-0.109D+01
 Coeff:      0.473D+00 0.928D+00
 Gap=     0.285 Goal=   None    Shift=    0.000
 Gap=     0.165 Goal=   None    Shift=    0.000
 RMSDP=1.55D-04 MaxDP=1.18D-02 DE= 5.15D-07 OVMax= 1.74D-02

 Cycle  47  Pass 1  IDiag  1:
 RMSU=  1.16D-04    CP:  1.00D+00  2.53D+00  3.00D+00  2.65D+00  2.72D+00
                    CP:  1.94D+00
 E= -732.197638458878     Delta-E=        0.000003344095 Rises=F Damp=F
 DIIS: error= 4.76D-05 at cycle  47 NSaved=  20.
 NSaved=20 IEnMin=10 EnMin= -732.198663453547     IErMin=20 ErrMin= 4.76D-05
 ErrMax= 4.76D-05  0.00D+00 EMaxC= 1.00D-01 BMatC= 2.84D-06 BMatP= 3.03D-06
 IDIUse=1 WtCom= 1.00D+00 WtEn= 0.00D+00
 Coeff-Com: -0.234D+00 0.601D+00-0.124D+01-0.498D+00 0.177D+01 0.575D+00
 Coeff-Com: -0.267D+00-0.435D+01 0.821D+01-0.731D+01 0.405D+01 0.164D+01
 Coeff-Com: -0.438D+01-0.712D+00 0.179D+01 0.158D+01-0.122D+00-0.138D+01
 Coeff-Com: -0.233D+00 0.151D+01
 Coeff:     -0.234D+00 0.601D+00-0.124D+01-0.498D+00 0.177D+01 0.575D+00
 Coeff:     -0.267D+00-0.435D+01 0.821D+01-0.731D+01 0.405D+01 0.164D+01
 Coeff:     -0.438D+01-0.712D+00 0.179D+01 0.158D+01-0.122D+00-0.138D+01
 Coeff:     -0.233D+00 0.151D+01
 Gap=     0.285 Goal=   None    Shift=    0.000
 Gap=     0.165 Goal=   None    Shift=    0.000
 RMSDP=2.25D-04 MaxDP=1.89D-02 DE= 3.34D-06 OVMax= 1.36D-02

 Cycle  48  Pass 1  IDiag  1:
 RMSU=  8.20D-05    CP:  1.00D+00  2.28D+00  3.00D+00  3.00D+00  3.00D+00
                    CP:  3.00D+00  2.46D+00
 E= -732.197653118175     Delta-E=       -0.000014659297 Rises=F Damp=F
 DIIS: error= 4.68D-05 at cycle  48 NSaved=  20.
 NSaved=20 IEnMin=10 EnMin= -732.198663453547     IErMin=20 ErrMin= 4.68D-05
 ErrMax= 4.68D-05  0.00D+00 EMaxC= 1.00D-01 BMatC= 2.77D-06 BMatP= 2.84D-06
 IDIUse=1 WtCom= 1.00D+00 WtEn= 0.00D+00
 Coeff-Com: -0.186D+00 0.461D+00-0.993D+00-0.511D+00 0.160D+01 0.820D+00
 Coeff-Com: -0.525D+00-0.465D+01 0.654D+01-0.556D+01 0.419D+01 0.226D+01
 Coeff-Com: -0.457D+01-0.118D+01 0.180D+01 0.178D+01-0.261D+00-0.124D+01
 Coeff-Com:  0.465D+00 0.774D+00
 Coeff:     -0.186D+00 0.461D+00-0.993D+00-0.511D+00 0.160D+01 0.820D+00
 Coeff:     -0.525D+00-0.465D+01 0.654D+01-0.556D+01 0.419D+01 0.226D+01
 Coeff:     -0.457D+01-0.118D+01 0.180D+01 0.178D+01-0.261D+00-0.124D+01
 Coeff:      0.465D+00 0.774D+00
 Gap=     0.285 Goal=   None    Shift=    0.000
 Gap=     0.165 Goal=   None    Shift=    0.000
 RMSDP=9.33D-05 MaxDP=8.64D-03 DE=-1.47D-05 OVMax= 4.57D-03

 Cycle  49  Pass 1  IDiag  1:
 RMSU=  1.75D-05    CP:  9.99D-01  2.15D+00  3.00D+00  3.00D+00  3.00D+00
                    CP:  3.00D+00  2.90D+00  1.69D+00
 E= -732.197659955888     Delta-E=       -0.000006837713 Rises=F Damp=F
 DIIS: error= 4.30D-05 at cycle  49 NSaved=  20.
 NSaved=20 IEnMin=10 EnMin= -732.198663453547     IErMin=20 ErrMin= 4.30D-05
 ErrMax= 4.30D-05  0.00D+00 EMaxC= 1.00D-01 BMatC= 2.25D-06 BMatP= 2.77D-06
 IDIUse=1 WtCom= 1.00D+00 WtEn= 0.00D+00
 Coeff-Com: -0.171D+00 0.367D+00-0.100D+01-0.430D+00 0.153D+01 0.941D+00
 Coeff-Com: -0.805D+00-0.447D+01 0.728D+01-0.622D+01 0.378D+01 0.237D+01
 Coeff-Com: -0.398D+01-0.130D+01 0.146D+01 0.189D+01-0.256D+00-0.124D+01
 Coeff-Com: -0.110D+00 0.136D+01
 Coeff:     -0.171D+00 0.367D+00-0.100D+01-0.430D+00 0.153D+01 0.941D+00
 Coeff:     -0.805D+00-0.447D+01 0.728D+01-0.622D+01 0.378D+01 0.237D+01
 Coeff:     -0.398D+01-0.130D+01 0.146D+01 0.189D+01-0.256D+00-0.124D+01
 Coeff:     -0.110D+00 0.136D+01
 Gap=     0.285 Goal=   None    Shift=    0.000
 Gap=     0.165 Goal=   None    Shift=    0.000
 RMSDP=2.17D-04 MaxDP=1.66D-02 DE=-6.84D-06 OVMax= 1.61D-02

 Cycle  50  Pass 1  IDiag  1:
 RMSU=  1.52D-04    CP:  9.99D-01  2.00D+00  3.00D+00  3.00D+00  3.00D+00
                    CP:  3.00D+00  3.00D+00  3.00D+00  2.42D+00
 E= -732.197664713094     Delta-E=       -0.000004757206 Rises=F Damp=F
 DIIS: error= 3.86D-05 at cycle  50 NSaved=  20.
 NSaved=20 IEnMin=10 EnMin= -732.198663453547     IErMin=20 ErrMin= 3.86D-05
 ErrMax= 3.86D-05  0.00D+00 EMaxC= 1.00D-01 BMatC= 1.70D-06 BMatP= 2.25D-06
 IDIUse=1 WtCom= 1.00D+00 WtEn= 0.00D+00
 Coeff-Com: -0.223D+00 0.400D+00-0.444D+00-0.265D+00 0.896D+00 0.589D-01
 Coeff-Com: -0.760D+00-0.212D+01 0.741D+01-0.731D+01 0.312D+01 0.170D+01
 Coeff-Com: -0.265D+01-0.127D+01 0.535D+00 0.145D+01 0.263D+00-0.998D+00
 Coeff-Com:  0.200D+00 0.101D+01
 Coeff:     -0.223D+00 0.400D+00-0.444D+00-0.265D+00 0.896D+00 0.589D-01
 Coeff:     -0.760D+00-0.212D+01 0.741D+01-0.731D+01 0.312D+01 0.170D+01
 Coeff:     -0.265D+01-0.127D+01 0.535D+00 0.145D+01 0.263D+00-0.998D+00
 Coeff:      0.200D+00 0.101D+01
 Gap=     0.285 Goal=   None    Shift=    0.000
 Gap=     0.165 Goal=   None    Shift=    0.000
 RMSDP=1.85D-04 MaxDP=1.56D-02 DE=-4.76D-06 OVMax= 2.44D-02

 Cycle  51  Pass 1  IDiag  1:
 RMSU=  1.08D-04    CP:  9.99D-01  2.21D+00  3.00D+00  3.00D+00  3.00D+00
                    CP:  3.00D+00  3.00D+00  3.00D+00  3.00D+00  1.83D+00
 E= -732.197652657878     Delta-E=        0.000012055216 Rises=F Damp=F
 DIIS: error= 7.10D-05 at cycle  51 NSaved=  20.
 NSaved=20 IEnMin=10 EnMin= -732.198663453547     IErMin=19 ErrMin= 3.86D-05
 ErrMax= 7.10D-05  0.00D+00 EMaxC= 1.00D-01 BMatC= 2.86D-06 BMatP= 1.70D-06
 IDIUse=1 WtCom= 1.00D+00 WtEn= 0.00D+00
 Coeff-Com: -0.280D+00 0.517D+00-0.448D+00-0.505D-01 0.691D+00-0.677D+00
 Coeff-Com: -0.608D+00-0.139D+00 0.930D+01-0.993D+01 0.230D+01 0.449D+00
 Coeff-Com: -0.968D+00-0.701D+00-0.512D+00 0.790D+00 0.109D+01-0.103D+01
 Coeff-Com:  0.669D+00 0.547D+00
 Coeff:     -0.280D+00 0.517D+00-0.448D+00-0.505D-01 0.691D+00-0.677D+00
 Coeff:     -0.608D+00-0.139D+00 0.930D+01-0.993D+01 0.230D+01 0.449D+00
 Coeff:     -0.968D+00-0.701D+00-0.512D+00 0.790D+00 0.109D+01-0.103D+01
 Coeff:      0.669D+00 0.547D+00
 Gap=     0.285 Goal=   None    Shift=    0.000
 Gap=     0.165 Goal=   None    Shift=    0.000
 RMSDP=1.98D-04 MaxDP=1.75D-02 DE= 1.21D-05 OVMax= 2.73D-02

 Cycle  52  Pass 1  IDiag  1:
 RMSU=  2.93D-05    CP:  9.99D-01  2.55D+00  3.00D+00  3.00D+00  3.00D+00
                    CP:  3.00D+00  3.00D+00  3.00D+00  3.00D+00  2.64D+00
                    CP:  1.86D+00
 E= -732.197639198791     Delta-E=        0.000013459087 Rises=F Damp=F
 DIIS: error= 1.36D-04 at cycle  52 NSaved=  20.
 NSaved=20 IEnMin=10 EnMin= -732.198663453547     IErMin=19 ErrMin= 7.10D-05
 ErrMax= 1.36D-04  0.00D+00 EMaxC= 1.00D-01 BMatC= 7.45D-06 BMatP= 2.86D-06
 IDIUse=1 WtCom= 1.00D+00 WtEn= 0.00D+00
 Coeff-Com: -0.253D+00 0.468D+00-0.518D+00 0.659D-01 0.608D+00-0.699D+00
 Coeff-Com: -0.579D+00 0.364D+00 0.896D+01-0.957D+01 0.151D+01-0.269D-01
 Coeff-Com:  0.791D-01-0.436D+00-0.101D+01 0.534D+00 0.131D+01-0.932D+00
 Coeff-Com:  0.158D+01-0.444D+00
 Coeff:     -0.253D+00 0.468D+00-0.518D+00 0.659D-01 0.608D+00-0.699D+00
 Coeff:     -0.579D+00 0.364D+00 0.896D+01-0.957D+01 0.151D+01-0.269D-01
 Coeff:      0.791D-01-0.436D+00-0.101D+01 0.534D+00 0.131D+01-0.932D+00
 Coeff:      0.158D+01-0.444D+00
 Gap=     0.285 Goal=   None    Shift=    0.000
 Gap=     0.165 Goal=   None    Shift=    0.000
 RMSDP=8.46D-05 MaxDP=7.80D-03 DE= 1.35D-05 OVMax= 1.18D-02

 Cycle  53  Pass 1  IDiag  1:
 RMSU=  1.70D-05    CP:  9.99D-01  2.41D+00  3.00D+00  3.00D+00  3.00D+00
                    CP:  3.00D+00  3.00D+00  3.00D+00  3.00D+00  2.23D+00
                    CP:  1.69D+00  6.52D-01
 E= -732.197643975329     Delta-E=       -0.000004776538 Rises=F Damp=F
 DIIS: error= 1.14D-04 at cycle  53 NSaved=  20.
 NSaved=20 IEnMin=10 EnMin= -732.198663453547     IErMin=18 ErrMin= 8.41D-05
 ErrMax= 1.14D-04  0.00D+00 EMaxC= 1.00D-01 BMatC= 5.74D-06 BMatP= 6.40D-06
 IDIUse=1 WtCom= 1.00D+00 WtEn= 0.00D+00
 Coeff-Com: -0.338D+00 0.604D+00 0.157D+00 0.398D+00-0.310D+00-0.224D+01
 Coeff-Com: -0.772D-02 0.427D+01 0.715D+01-0.936D+01 0.238D-01-0.189D+01
 Coeff-Com:  0.310D+01 0.300D-01-0.310D+01-0.846D+00 0.288D+01-0.374D+00
 Coeff-Com:  0.230D+00 0.629D+00
 Coeff:     -0.338D+00 0.604D+00 0.157D+00 0.398D+00-0.310D+00-0.224D+01
 Coeff:     -0.772D-02 0.427D+01 0.715D+01-0.936D+01 0.238D-01-0.189D+01
 Coeff:      0.310D+01 0.300D-01-0.310D+01-0.846D+00 0.288D+01-0.374D+00
 Coeff:      0.230D+00 0.629D+00
 Gap=     0.285 Goal=   None    Shift=    0.000
 Gap=     0.165 Goal=   None    Shift=    0.000
 RMSDP=2.65D-04 MaxDP=2.36D-02 DE=-4.78D-06 OVMax= 1.41D-02

 Cycle  54  Pass 1  IDiag  1:
 RMSU=  6.85D-05    CP:  1.00D+00  2.81D+00  3.00D+00  3.00D+00  3.00D+00
                    CP:  3.00D+00  3.00D+00  3.00D+00  3.00D+00  1.03D+00
                    CP:  1.76D+00  3.00D+00  3.00D+00
 E= -732.197621817652     Delta-E=        0.000022157677 Rises=F Damp=F
 DIIS: error= 1.35D-04 at cycle  54 NSaved=  20.
 NSaved=20 IEnMin=10 EnMin= -732.198663453547     IErMin=18 ErrMin= 8.41D-05
 ErrMax= 1.35D-04  0.00D+00 EMaxC= 1.00D-01 BMatC= 8.04D-06 BMatP= 5.74D-06
 IDIUse=1 WtCom= 1.00D+00 WtEn= 0.00D+00
 Coeff-Com: -0.328D+00 0.577D+00 0.274D+00 0.365D+00-0.392D+00-0.225D+01
 Coeff-Com:  0.182D-01 0.427D+01 0.662D+01-0.884D+01 0.668D-01-0.175D+01
 Coeff-Com:  0.288D+01-0.449D-01-0.294D+01-0.813D+00 0.273D+01-0.293D+00
 Coeff-Com:  0.876D+00-0.266D-01
 Coeff:     -0.328D+00 0.577D+00 0.274D+00 0.365D+00-0.392D+00-0.225D+01
 Coeff:      0.182D-01 0.427D+01 0.662D+01-0.884D+01 0.668D-01-0.175D+01
 Coeff:      0.288D+01-0.449D-01-0.294D+01-0.813D+00 0.273D+01-0.293D+00
 Coeff:      0.876D+00-0.266D-01
 Gap=     0.285 Goal=   None    Shift=    0.000
 Gap=     0.165 Goal=   None    Shift=    0.000
 RMSDP=2.70D-05 MaxDP=2.41D-03 DE= 2.22D-05 OVMax= 3.69D-03

 Cycle  55  Pass 1  IDiag  1:
 RMSU=  5.85D-06    CP:  1.00D+00  2.76D+00  3.00D+00  2.97D+00  3.00D+00
                    CP:  3.00D+00  3.00D+00  3.00D+00  3.00D+00  9.23D-01
                    CP:  1.68D+00  3.00D+00  3.00D+00  9.87D-01
 E= -732.197623481463     Delta-E=       -0.000001663811 Rises=F Damp=F
 DIIS: error= 1.29D-04 at cycle  55 NSaved=  20.
 NSaved=20 IEnMin=10 EnMin= -732.198663453547     IErMin=18 ErrMin= 8.41D-05
 ErrMax= 1.29D-04  0.00D+00 EMaxC= 1.00D-01 BMatC= 7.66D-06 BMatP= 6.40D-06
 IDIUse=1 WtCom= 1.00D+00 WtEn= 0.00D+00
 Coeff-Com: -0.225D+00 0.390D+00 0.124D+00 0.368D+00-0.321D+00-0.153D+01
 Coeff-Com:  0.166D+00 0.350D+01 0.179D+01-0.338D+01-0.102D+01-0.233D+01
 Coeff-Com:  0.422D+01 0.561D+00-0.340D+01-0.163D+01 0.305D+01-0.500D-01
 Coeff-Com:  0.124D+01-0.528D+00
 Coeff:     -0.225D+00 0.390D+00 0.124D+00 0.368D+00-0.321D+00-0.153D+01
 Coeff:      0.166D+00 0.350D+01 0.179D+01-0.338D+01-0.102D+01-0.233D+01
 Coeff:      0.422D+01 0.561D+00-0.340D+01-0.163D+01 0.305D+01-0.500D-01
 Coeff:      0.124D+01-0.528D+00
 Gap=     0.285 Goal=   None    Shift=    0.000
 Gap=     0.165 Goal=   None    Shift=    0.000
 RMSDP=3.12D-04 MaxDP=2.38D-02 DE=-1.66D-06 OVMax= 3.56D-02

 Cycle  56  Pass 1  IDiag  1:
 RMSU=  3.83D-05    CP:  1.00D+00  2.62D+00  3.00D+00  2.02D+00  3.00D+00
                    CP:  3.00D+00  1.80D+00  2.33D+00  3.00D+00  1.20D-01
                    CP:  6.12D-01  2.78D+00  3.00D+00  8.69D-01 -1.90D+00
 E= -732.197624609658     Delta-E=       -0.000001128195 Rises=F Damp=F
 DIIS: error= 5.08D-05 at cycle  56 NSaved=  20.
 NSaved=20 IEnMin=10 EnMin= -732.198663453547     IErMin=20 ErrMin= 5.08D-05
 ErrMax= 5.08D-05  0.00D+00 EMaxC= 1.00D-01 BMatC= 2.91D-06 BMatP= 6.40D-06
 IDIUse=1 WtCom= 1.00D+00 WtEn= 0.00D+00
 Coeff-Com: -0.446D-01 0.883D-01 0.259D-01-0.621D-01 0.384D-01-0.190D+00
 Coeff-Com:  0.418D+00 0.784D+00-0.331D+01 0.274D+01-0.292D+00-0.178D+01
 Coeff-Com:  0.163D+01 0.136D+01-0.922D+00-0.195D+01 0.150D+01-0.171D+00
 Coeff-Com:  0.485D-01 0.109D+01
 Coeff:     -0.446D-01 0.883D-01 0.259D-01-0.621D-01 0.384D-01-0.190D+00
 Coeff:      0.418D+00 0.784D+00-0.331D+01 0.274D+01-0.292D+00-0.178D+01
 Coeff:      0.163D+01 0.136D+01-0.922D+00-0.195D+01 0.150D+01-0.171D+00
 Coeff:      0.485D-01 0.109D+01
 Gap=     0.285 Goal=   None    Shift=    0.000
 Gap=     0.165 Goal=   None    Shift=    0.000
 RMSDP=2.32D-04 MaxDP=1.97D-02 DE=-1.13D-06 OVMax= 2.90D-02

 Cycle  57  Pass 1  IDiag  1:
 RMSU=  4.25D-05    CP:  1.00D+00  2.84D+00  3.00D+00  2.07D+00  3.00D+00
                    CP:  3.00D+00  3.00D+00  2.57D+00  2.75D+00  4.49D-01
                    CP:  3.85D-01  2.78D+00 -1.71D-01  5.58D-01 -9.23D-01
                    CP:  5.95D-01
 E= -732.197623247226     Delta-E=        0.000001362432 Rises=F Damp=F
 DIIS: error= 4.50D-05 at cycle  57 NSaved=  20.
 NSaved=20 IEnMin=10 EnMin= -732.198663453547     IErMin=20 ErrMin= 4.50D-05
 ErrMax= 4.50D-05  0.00D+00 EMaxC= 1.00D-01 BMatC= 2.06D-06 BMatP= 2.91D-06
 IDIUse=1 WtCom= 1.00D+00 WtEn= 0.00D+00
 Coeff-Com:  0.315D-01 0.731D-01-0.512D+00-0.145D+00 0.492D+00 0.564D+00
 Coeff-Com:  0.432D+00-0.853D+00-0.326D+01 0.330D+01-0.901D-01-0.155D+01
 Coeff-Com:  0.104D+01 0.144D+01-0.315D+00-0.135D+01 0.103D+01-0.516D+00
 Coeff-Com:  0.273D+00 0.916D+00
 Coeff:      0.315D-01 0.731D-01-0.512D+00-0.145D+00 0.492D+00 0.564D+00
 Coeff:      0.432D+00-0.853D+00-0.326D+01 0.330D+01-0.901D-01-0.155D+01
 Coeff:      0.104D+01 0.144D+01-0.315D+00-0.135D+01 0.103D+01-0.516D+00
 Coeff:      0.273D+00 0.916D+00
 Gap=     0.285 Goal=   None    Shift=    0.000
 Gap=     0.165 Goal=   None    Shift=    0.000
 RMSDP=1.62D-04 MaxDP=1.29D-02 DE= 1.36D-06 OVMax= 1.92D-02

 Cycle  58  Pass 1  IDiag  1:
 RMSU=  3.41D-05    CP:  9.99D-01  2.92D+00  3.00D+00  2.52D+00  3.00D+00
                    CP:  3.00D+00  3.00D+00  3.00D+00  1.57D+00  1.29D+00
                    CP:  1.61D-01  1.81D+00 -2.55D+00  7.32D-01 -2.62D-01
                    CP:  3.38D-01  1.70D+00
 E= -732.197629110667     Delta-E=       -0.000005863442 Rises=F Damp=F
 DIIS: error= 4.11D-05 at cycle  58 NSaved=  20.
 NSaved=20 IEnMin=10 EnMin= -732.198663453547     IErMin=20 ErrMin= 4.11D-05
 ErrMax= 4.11D-05  0.00D+00 EMaxC= 1.00D-01 BMatC= 1.21D-06 BMatP= 2.06D-06
 IDIUse=1 WtCom= 1.00D+00 WtEn= 0.00D+00
 Coeff-Com: -0.488D-01 0.317D+00-0.675D+00-0.196D+00 0.714D+00-0.304D-01
 Coeff-Com:  0.562D+00-0.109D+01 0.166D+01-0.169D+01 0.129D+01-0.609D+00
 Coeff-Com: -0.127D+01 0.683D+00 0.713D+00-0.238D+00 0.348D+00-0.567D+00
 Coeff-Com: -0.112D+00 0.123D+01
 Coeff:     -0.488D-01 0.317D+00-0.675D+00-0.196D+00 0.714D+00-0.304D-01
 Coeff:      0.562D+00-0.109D+01 0.166D+01-0.169D+01 0.129D+01-0.609D+00
 Coeff:     -0.127D+01 0.683D+00 0.713D+00-0.238D+00 0.348D+00-0.567D+00
 Coeff:     -0.112D+00 0.123D+01
 Gap=     0.285 Goal=   None    Shift=    0.000
 Gap=     0.165 Goal=   None    Shift=    0.000
 RMSDP=2.06D-04 MaxDP=1.65D-02 DE=-5.86D-06 OVMax= 1.38D-02

 Cycle  59  Pass 1  IDiag  1:
 RMSU=  3.78D-05    CP:  9.98D-01  2.74D+00  3.00D+00  2.70D+00  3.00D+00
                    CP:  3.00D+00  3.00D+00  3.00D+00 -1.82D-01  2.24D+00
                    CP:  9.24D-02 -9.42D-01 -3.00D+00  5.24D-01 -7.87D-01
                    CP: -1.48D-01  2.85D+00  1.76D+00
 E= -732.197639840268     Delta-E=       -0.000010729601 Rises=F Damp=F
 DIIS: error= 3.16D-05 at cycle  59 NSaved=  20.
 NSaved=20 IEnMin=10 EnMin= -732.198663453547     IErMin=20 ErrMin= 3.16D-05
 ErrMax= 3.16D-05  0.00D+00 EMaxC= 1.00D-01 BMatC= 1.26D-06 BMatP= 1.21D-06
 IDIUse=1 WtCom= 1.00D+00 WtEn= 0.00D+00
 Coeff-Com:  0.563D-01 0.141D+00-0.920D+00-0.369D+00 0.110D+01 0.109D+01
 Coeff-Com:  0.207D+00-0.356D+01-0.131D+00 0.129D+01 0.167D+01 0.493D+00
 Coeff-Com: -0.243D+01 0.320D+00 0.159D+01 0.436D+00-0.444D+00-0.679D+00
 Coeff-Com:  0.431D+00 0.712D+00
 Coeff:      0.563D-01 0.141D+00-0.920D+00-0.369D+00 0.110D+01 0.109D+01
 Coeff:      0.207D+00-0.356D+01-0.131D+00 0.129D+01 0.167D+01 0.493D+00
 Coeff:     -0.243D+01 0.320D+00 0.159D+01 0.436D+00-0.444D+00-0.679D+00
 Coeff:      0.431D+00 0.712D+00
 Gap=     0.285 Goal=   None    Shift=    0.000
 Gap=     0.165 Goal=   None    Shift=    0.000
 RMSDP=1.94D-04 MaxDP=1.78D-02 DE=-1.07D-05 OVMax= 1.01D-02

 Cycle  60  Pass 1  IDiag  1:
 RMSU=  3.21D-05    CP:  9.98D-01  2.39D+00  3.00D+00  2.80D+00  3.00D+00
                    CP:  3.00D+00  3.00D+00  3.00D+00 -1.60D+00  2.75D+00
                    CP: -8.59D-02 -3.00D+00 -3.00D+00  1.21D-01  3.00D+00
                    CP: -1.72D-01  3.00D+00  2.53D+00  1.83D+00
 E= -732.197646746468     Delta-E=       -0.000006906199 Rises=F Damp=F
 DIIS: error= 9.22D-05 at cycle  60 NSaved=  20.
 NSaved=20 IEnMin=10 EnMin= -732.198663453547     IErMin=19 ErrMin= 3.16D-05
 ErrMax= 9.22D-05  0.00D+00 EMaxC= 1.00D-01 BMatC= 3.64D-06 BMatP= 1.26D-06
 IDIUse=1 WtCom= 1.00D+00 WtEn= 0.00D+00
 Coeff-Com:  0.111D+00 0.136D-01-0.920D+00-0.441D+00 0.119D+01 0.164D+01
 Coeff-Com: -0.542D-01-0.481D+01-0.136D+01 0.314D+01 0.187D+01 0.139D+01
 Coeff-Com: -0.307D+01-0.191D+00 0.198D+01 0.987D+00-0.940D+00-0.599D+00
 Coeff-Com:  0.932D+00 0.133D+00
 Coeff:      0.111D+00 0.136D-01-0.920D+00-0.441D+00 0.119D+01 0.164D+01
 Coeff:     -0.542D-01-0.481D+01-0.136D+01 0.314D+01 0.187D+01 0.139D+01
 Coeff:     -0.307D+01-0.191D+00 0.198D+01 0.987D+00-0.940D+00-0.599D+00
 Coeff:      0.932D+00 0.133D+00
 Gap=     0.285 Goal=   None    Shift=    0.000
 Gap=     0.165 Goal=   None    Shift=    0.000
 RMSDP=1.84D-04 MaxDP=1.34D-02 DE=-6.91D-06 OVMax= 2.21D-02

 Cycle  61  Pass 1  IDiag  1:
 Restarting incremental Fock formation.
 E= -732.197651138664     Delta-E=       -0.000004392197 Rises=F Damp=F
 DIIS: error= 1.53D-04 at cycle  61 NSaved=  20.
 NSaved=20 IEnMin=10 EnMin= -732.198663453547     IErMin=18 ErrMin= 8.41D-05
 ErrMax= 1.53D-04  0.00D+00 EMaxC= 1.00D-01 BMatC= 8.97D-06 BMatP= 3.64D-06
 IDIUse=1 WtCom= 1.00D+00 WtEn= 0.00D+00
 Coeff-Com:  0.593D-01 0.202D+00-0.990D+00-0.266D+00 0.106D+01 0.790D+00
 Coeff-Com:  0.181D+00-0.327D+01 0.132D+01-0.179D+00 0.172D+01 0.801D+00
 Coeff-Com: -0.250D+01-0.200D+00 0.138D+01 0.948D+00-0.449D+00-0.597D+00
 Coeff-Com:  0.205D+01-0.107D+01
 Coeff:      0.593D-01 0.202D+00-0.990D+00-0.266D+00 0.106D+01 0.790D+00
 Coeff:      0.181D+00-0.327D+01 0.132D+01-0.179D+00 0.172D+01 0.801D+00
 Coeff:     -0.250D+01-0.200D+00 0.138D+01 0.948D+00-0.449D+00-0.597D+00
 Coeff:      0.205D+01-0.107D+01
 Gap=     0.285 Goal=   None    Shift=    0.000
 Gap=     0.165 Goal=   None    Shift=    0.000
 RMSDP=3.30D-05 MaxDP=3.11D-03 DE=-4.39D-06 OVMax= 5.19D-03

 Cycle  62  Pass 1  IDiag  1:
 RMSU=  3.30D-05    CP:  1.00D+00
 E= -732.197648339864     Delta-E=        0.000002798801 Rises=F Damp=F
 DIIS: error= 1.61D-04 at cycle  62 NSaved=  20.
 NSaved=20 IEnMin=10 EnMin= -732.198663453547     IErMin=18 ErrMin= 8.41D-05
 ErrMax= 1.61D-04  0.00D+00 EMaxC= 1.00D-01 BMatC= 9.42D-06 BMatP= 6.40D-06
 IDIUse=1 WtCom= 1.00D+00 WtEn= 0.00D+00
 Coeff-Com:  0.157D+00-0.342D+00-0.859D-01-0.472D+00 0.530D+00 0.201D+01
 Coeff-Com: -0.479D+00-0.523D+01-0.530D+01 0.731D+01 0.176D+01 0.331D+01
 Coeff-Com: -0.353D+01-0.168D+01 0.206D+01 0.181D+01-0.171D+01 0.205D+00
 Coeff-Com:  0.328D+00 0.344D+00
 Coeff:      0.157D+00-0.342D+00-0.859D-01-0.472D+00 0.530D+00 0.201D+01
 Coeff:     -0.479D+00-0.523D+01-0.530D+01 0.731D+01 0.176D+01 0.331D+01
 Coeff:     -0.353D+01-0.168D+01 0.206D+01 0.181D+01-0.171D+01 0.205D+00
 Coeff:      0.328D+00 0.344D+00
 Gap=     0.285 Goal=   None    Shift=    0.000
 Gap=     0.164 Goal=   None    Shift=    0.000
 RMSDP=7.25D-04 MaxDP=7.34D-02 DE= 2.80D-06 OVMax= 1.09D-01

 Cycle  63  Pass 1  IDiag  1:
 RMSU=  6.29D-04    CP:  1.00D+00 -3.00D+00
 E= -732.197742023806     Delta-E=       -0.000093683942 Rises=F Damp=F
 DIIS: error= 1.88D-04 at cycle  63 NSaved=  20.
 NSaved=20 IEnMin=10 EnMin= -732.198663453547     IErMin=18 ErrMin= 8.41D-05
 ErrMax= 1.88D-04  0.00D+00 EMaxC= 1.00D-01 BMatC= 1.55D-05 BMatP= 6.40D-06
 IDIUse=1 WtCom= 1.00D+00 WtEn= 0.00D+00
 Coeff-Com:  0.202D+00 0.168D+00-0.137D+01-0.186D+00 0.122D+01 0.857D+00
 Coeff-Com:  0.480D+00-0.345D+01-0.284D+00 0.177D+01 0.141D+01 0.772D+00
 Coeff-Com: -0.244D+01-0.407D+00 0.118D+01 0.962D+00-0.176D+00-0.214D+00
 Coeff-Com:  0.135D+01-0.841D+00
 Coeff:      0.202D+00 0.168D+00-0.137D+01-0.186D+00 0.122D+01 0.857D+00
 Coeff:      0.480D+00-0.345D+01-0.284D+00 0.177D+01 0.141D+01 0.772D+00
 Coeff:     -0.244D+01-0.407D+00 0.118D+01 0.962D+00-0.176D+00-0.214D+00
 Coeff:      0.135D+01-0.841D+00
 Gap=     0.285 Goal=   None    Shift=    0.000
 Gap=     0.164 Goal=   None    Shift=    0.000
 RMSDP=3.31D-04 MaxDP=2.89D-02 DE=-9.37D-05 OVMax= 3.37D-02

 Cycle  64  Pass 1  IDiag  1:
 RMSU=  2.14D-04    CP:  1.00D+00 -3.00D+00  6.02D-01
 E= -732.197667365978     Delta-E=        0.000074657828 Rises=F Damp=F
 DIIS: error= 3.12D-04 at cycle  64 NSaved=  20.
 NSaved=20 IEnMin=10 EnMin= -732.198663453547     IErMin=18 ErrMin= 8.41D-05
 ErrMax= 3.12D-04  0.00D+00 EMaxC= 1.00D-01 BMatC= 3.58D-05 BMatP= 6.40D-06
 IDIUse=1 WtCom= 1.00D+00 WtEn= 0.00D+00
 Coeff-Com: -0.297D+00-0.584D+00 0.243D+01-0.396D-01-0.157D+01 0.417D+00
 Coeff-Com: -0.205D+01-0.612D+00-0.287D+01 0.299D+01 0.618D+00 0.421D+01
 Coeff-Com: -0.438D+00-0.308D+01-0.192D+00 0.197D+01-0.167D+01 0.632D+00
 Coeff-Com:  0.250D+01-0.135D+01
 Coeff:     -0.297D+00-0.584D+00 0.243D+01-0.396D-01-0.157D+01 0.417D+00
 Coeff:     -0.205D+01-0.612D+00-0.287D+01 0.299D+01 0.618D+00 0.421D+01
 Coeff:     -0.438D+00-0.308D+01-0.192D+00 0.197D+01-0.167D+01 0.632D+00
 Coeff:      0.250D+01-0.135D+01
 Gap=     0.285 Goal=   None    Shift=    0.000
 Gap=     0.173 Goal=   None    Shift=    0.000
 RMSDP=8.39D-04 MaxDP=5.43D-02 DE= 7.47D-05 OVMax= 4.95D-02

 Cycle  65  Pass 1  IDiag  1:
 RMSU=  2.41D-04    CP:  1.00D+00 -3.00D+00  9.45D-01 -2.54D+00
 E= -732.197721089603     Delta-E=       -0.000053723625 Rises=F Damp=F
 DIIS: error= 1.49D-04 at cycle  65 NSaved=  20.
 NSaved=20 IEnMin=10 EnMin= -732.198663453547     IErMin=18 ErrMin= 8.41D-05
 ErrMax= 1.49D-04  0.00D+00 EMaxC= 1.00D-01 BMatC= 1.03D-05 BMatP= 6.40D-06
 IDIUse=1 WtCom= 1.00D+00 WtEn= 0.00D+00
 Coeff-Com: -0.236D+00-0.157D-01 0.173D+01 0.334D-01-0.150D+01-0.183D+01
 Coeff-Com: -0.430D+00 0.423D+01 0.336D+01-0.472D+01-0.916D+00-0.273D+00
 Coeff-Com:  0.133D+01-0.186D+00-0.698D+00-0.125D+00-0.398D+00 0.984D-02
 Coeff-Com:  0.479D+00 0.114D+01
 Coeff:     -0.236D+00-0.157D-01 0.173D+01 0.334D-01-0.150D+01-0.183D+01
 Coeff:     -0.430D+00 0.423D+01 0.336D+01-0.472D+01-0.916D+00-0.273D+00
 Coeff:      0.133D+01-0.186D+00-0.698D+00-0.125D+00-0.398D+00 0.984D-02
 Coeff:      0.479D+00 0.114D+01
 Gap=     0.285 Goal=   None    Shift=    0.000
 Gap=     0.165 Goal=   None    Shift=    0.000
 RMSDP=8.61D-04 MaxDP=8.06D-02 DE=-5.37D-05 OVMax= 1.23D-01

 Cycle  66  Pass 1  IDiag  1:
 RMSU=  9.17D-05    CP:  1.00D+00  8.26D-01 -2.66D-01 -2.39D+00  3.34D-01
 E= -732.197637744052     Delta-E=        0.000083345551 Rises=F Damp=F
 DIIS: error= 2.29D-04 at cycle  66 NSaved=  20.
 NSaved=20 IEnMin=10 EnMin= -732.198663453547     IErMin=18 ErrMin= 8.41D-05
 ErrMax= 2.29D-04  0.00D+00 EMaxC= 1.00D-01 BMatC= 2.03D-05 BMatP= 6.40D-06
 IDIUse=1 WtCom= 1.00D+00 WtEn= 0.00D+00
 Large coefficients: NSaved= 20 BigCof=   11.25 CofMax=   10.00 Det=-5.13D-10
 Inversion failed.  Reducing to 19 matrices.
 Coeff-Com:  0.589D-01 0.932D+00 0.103D+01-0.165D+01-0.286D+01-0.490D+00
 Coeff-Com:  0.783D+01-0.716D-01-0.171D+01-0.414D+01-0.282D+01 0.800D+01
 Coeff-Com: -0.445D+00-0.584D+01-0.144D+01 0.326D+01 0.436D+00 0.108D+01
 Coeff-Com: -0.142D+00
 Coeff:      0.589D-01 0.932D+00 0.103D+01-0.165D+01-0.286D+01-0.490D+00
 Coeff:      0.783D+01-0.716D-01-0.171D+01-0.414D+01-0.282D+01 0.800D+01
 Coeff:     -0.445D+00-0.584D+01-0.144D+01 0.326D+01 0.436D+00 0.108D+01
 Coeff:     -0.142D+00
 Gap=     0.285 Goal=   None    Shift=    0.000
 Gap=     0.165 Goal=   None    Shift=    0.000
 RMSDP=9.15D-04 MaxDP=6.65D-02 DE= 8.33D-05 OVMax= 7.46D-02

 Cycle  67  Pass 1  IDiag  1:
 RMSU=  2.30D-04    CP:  1.00D+00  2.91D-01  6.66D-01 -2.21D+00  2.93D+00
                    CP: -3.56D-01
 E= -732.197606706103     Delta-E=        0.000031037949 Rises=F Damp=F
 DIIS: error= 2.22D-04 at cycle  67 NSaved=  20.
 NSaved=20 IEnMin= 9 EnMin= -732.198663453547     IErMin=17 ErrMin= 8.41D-05
 ErrMax= 2.22D-04  0.00D+00 EMaxC= 1.00D-01 BMatC= 1.99D-05 BMatP= 6.40D-06
 IDIUse=1 WtCom= 1.00D+00 WtEn= 0.00D+00
 Coeff-Com:  0.410D-01 0.504D+00 0.127D+01-0.129D+01-0.206D+01-0.139D+01
 Coeff-Com:  0.537D+01 0.464D+00-0.129D+01-0.297D+01-0.884D+00 0.733D+01
 Coeff-Com: -0.234D+01-0.617D+01 0.534D+00 0.293D+01 0.130D+00 0.110D+01
 Coeff-Com:  0.267D+00-0.556D+00
 Coeff:      0.410D-01 0.504D+00 0.127D+01-0.129D+01-0.206D+01-0.139D+01
 Coeff:      0.537D+01 0.464D+00-0.129D+01-0.297D+01-0.884D+00 0.733D+01
 Coeff:     -0.234D+01-0.617D+01 0.534D+00 0.293D+01 0.130D+00 0.110D+01
 Coeff:      0.267D+00-0.556D+00
 Gap=     0.285 Goal=   None    Shift=    0.000
 Gap=     0.165 Goal=   None    Shift=    0.000
 RMSDP=2.28D-04 MaxDP=2.31D-02 DE= 3.10D-05 OVMax= 1.15D-02

 Cycle  68  Pass 1  IDiag  1:
 RMSU=  5.20D-05    CP:  1.00D+00 -2.57D+00  5.14D-01 -2.24D+00  2.45D+00
                    CP:  1.60D-02  5.01D-01
 E= -732.197630359841     Delta-E=       -0.000023653738 Rises=F Damp=F
 DIIS: error= 1.95D-04 at cycle  68 NSaved=  20.
 NSaved=20 IEnMin= 9 EnMin= -732.198663453547     IErMin=17 ErrMin= 8.41D-05
 ErrMax= 1.95D-04  0.00D+00 EMaxC= 1.00D-01 BMatC= 1.58D-05 BMatP= 6.40D-06
 IDIUse=1 WtCom= 1.00D+00 WtEn= 0.00D+00
 Coeff-Com:  0.424D-01 0.621D+00 0.136D+01-0.150D+01-0.305D+01-0.106D+01
 Coeff-Com:  0.751D+01 0.408D+01-0.561D+01-0.323D+01-0.135D+01 0.681D+01
 Coeff-Com: -0.191D+01-0.578D+01-0.185D+00 0.280D+01 0.434D+00 0.123D+01
 Coeff-Com: -0.149D+01 0.128D+01
 Coeff:      0.424D-01 0.621D+00 0.136D+01-0.150D+01-0.305D+01-0.106D+01
 Coeff:      0.751D+01 0.408D+01-0.561D+01-0.323D+01-0.135D+01 0.681D+01
 Coeff:     -0.191D+01-0.578D+01-0.185D+00 0.280D+01 0.434D+00 0.123D+01
 Coeff:     -0.149D+01 0.128D+01
 Gap=     0.285 Goal=   None    Shift=    0.000
 Gap=     0.165 Goal=   None    Shift=    0.000
 RMSDP=2.55D-04 MaxDP=1.73D-02 DE=-2.37D-05 OVMax= 2.63D-02

 Cycle  69  Pass 1  IDiag  1:
 RMSU=  2.51D-05    CP:  1.00D+00 -8.18D-01  2.46D-01 -2.73D+00  1.93D+00
                    CP:  6.40D-01  3.13D-01  6.92D-01
 E= -732.197613698170     Delta-E=        0.000016661671 Rises=F Damp=F
 DIIS: error= 2.69D-04 at cycle  69 NSaved=  20.
 NSaved=20 IEnMin= 9 EnMin= -732.198663453547     IErMin=17 ErrMin= 8.41D-05
 ErrMax= 2.69D-04  0.00D+00 EMaxC= 1.00D-01 BMatC= 2.80D-05 BMatP= 6.40D-06
 IDIUse=1 WtCom= 1.00D+00 WtEn= 0.00D+00
 Large coefficients: NSaved= 20 BigCof=   11.92 CofMax=   10.00 Det=-4.47D-10
 Inversion failed.  Reducing to 19 matrices.
 Coeff-Com:  0.174D+00 0.159D+00 0.548D+00-0.735D+00-0.229D+01 0.876D+00
 Coeff-Com:  0.588D+01 0.125D+01-0.335D+01-0.274D+01-0.296D+01 0.469D+01
 Coeff-Com:  0.104D+01-0.322D+01-0.230D+01 0.270D+01 0.691D+00 0.108D+01
 Coeff-Com: -0.494D+00
 Coeff:      0.174D+00 0.159D+00 0.548D+00-0.735D+00-0.229D+01 0.876D+00
 Coeff:      0.588D+01 0.125D+01-0.335D+01-0.274D+01-0.296D+01 0.469D+01
 Coeff:      0.104D+01-0.322D+01-0.230D+01 0.270D+01 0.691D+00 0.108D+01
 Coeff:     -0.494D+00
 Gap=     0.285 Goal=   None    Shift=    0.000
 Gap=     0.165 Goal=   None    Shift=    0.000
 RMSDP=6.96D-04 MaxDP=4.41D-02 DE= 1.67D-05 OVMax= 6.70D-02

 Cycle  70  Pass 1  IDiag  1:
 RMSU=  4.62D-05    CP:  1.00D+00 -3.00D+00  9.74D-01 -1.17D+00  3.00D+00
                    CP: -1.05D+00  1.17D+00 -5.53D-01 -8.92D-01
 E= -732.197651242221     Delta-E=       -0.000037544050 Rises=F Damp=F
 DIIS: error= 7.51D-05 at cycle  70 NSaved=  20.
 NSaved=20 IEnMin= 9 EnMin= -732.198663453547     IErMin=20 ErrMin= 7.51D-05
 ErrMax= 7.51D-05  0.00D+00 EMaxC= 1.00D-01 BMatC= 4.75D-06 BMatP= 6.40D-06
 IDIUse=1 WtCom= 1.00D+00 WtEn= 0.00D+00
 Coeff-Com: -0.527D-01 0.128D+01-0.515D+00-0.834D+00-0.104D+01 0.105D+01
 Coeff-Com:  0.279D+01-0.618D+01 0.558D+01-0.187D+01-0.260D+01 0.122D+01
 Coeff-Com:  0.266D+01 0.440D+00-0.312D+01 0.325D+00 0.445D+00 0.876D+00
 Coeff-Com: -0.816D+00 0.135D+01
 Coeff:     -0.527D-01 0.128D+01-0.515D+00-0.834D+00-0.104D+01 0.105D+01
 Coeff:      0.279D+01-0.618D+01 0.558D+01-0.187D+01-0.260D+01 0.122D+01
 Coeff:      0.266D+01 0.440D+00-0.312D+01 0.325D+00 0.445D+00 0.876D+00
 Coeff:     -0.816D+00 0.135D+01
 Gap=     0.285 Goal=   None    Shift=    0.000
 Gap=     0.165 Goal=   None    Shift=    0.000
 RMSDP=3.40D-04 MaxDP=3.12D-02 DE=-3.75D-05 OVMax= 4.69D-02

 Cycle  71  Pass 1  IDiag  1:
 RMSU=  2.48D-05    CP:  1.00D+00  3.00D+00  7.14D-01 -7.77D-01  2.59D+00
                    CP: -1.04D+00  1.44D+00 -1.52D+00 -5.45D-01 -1.94D-03
 E= -732.197613517729     Delta-E=        0.000037724491 Rises=F Damp=F
 DIIS: error= 6.09D-05 at cycle  71 NSaved=  20.
 NSaved=20 IEnMin= 9 EnMin= -732.198663453547     IErMin=20 ErrMin= 6.09D-05
 ErrMax= 6.09D-05  0.00D+00 EMaxC= 1.00D-01 BMatC= 3.58D-06 BMatP= 4.75D-06
 IDIUse=1 WtCom= 1.00D+00 WtEn= 0.00D+00
 Coeff-Com: -0.591D-01 0.708D+00-0.454D+00-0.420D+00 0.913D-01 0.622D+00
 Coeff-Com:  0.773D+00-0.629D+01 0.599D+01-0.141D+01-0.178D+01 0.177D+01
 Coeff-Com:  0.179D+01-0.269D+00-0.183D+01 0.672D+00-0.312D-01-0.147D+00
 Coeff-Com:  0.611D+00 0.660D+00
 Coeff:     -0.591D-01 0.708D+00-0.454D+00-0.420D+00 0.913D-01 0.622D+00
 Coeff:      0.773D+00-0.629D+01 0.599D+01-0.141D+01-0.178D+01 0.177D+01
 Coeff:      0.179D+01-0.269D+00-0.183D+01 0.672D+00-0.312D-01-0.147D+00
 Coeff:      0.611D+00 0.660D+00
 Gap=     0.285 Goal=   None    Shift=    0.000
 Gap=     0.165 Goal=   None    Shift=    0.000
 RMSDP=8.27D-05 MaxDP=6.18D-03 DE= 3.77D-05 OVMax= 1.01D-02

 Cycle  72  Pass 1  IDiag  1:
 RMSU=  1.61D-05    CP:  1.00D+00  1.92D+00  7.70D-01 -6.36D-01  2.56D+00
                    CP: -1.34D+00  1.38D+00 -1.08D+00 -1.37D+00 -4.13D-02
                    CP:  5.80D-01
 E= -732.197625574330     Delta-E=       -0.000012056601 Rises=F Damp=F
 DIIS: error= 4.31D-05 at cycle  72 NSaved=  20.
 NSaved=20 IEnMin= 9 EnMin= -732.198663453547     IErMin=20 ErrMin= 4.31D-05
 ErrMax= 4.31D-05  0.00D+00 EMaxC= 1.00D-01 BMatC= 2.18D-06 BMatP= 3.58D-06
 IDIUse=1 WtCom= 1.00D+00 WtEn= 0.00D+00
 Coeff-Com:  0.380D+00-0.992D+00-0.539D+00 0.120D+01 0.391D-01 0.105D+01
 Coeff-Com: -0.180D+01 0.397D+01-0.378D+01 0.168D+01-0.455D+00-0.315D+01
 Coeff-Com:  0.127D+01 0.221D+01-0.412D+00-0.321D+00-0.714D+00-0.509D-01
 Coeff-Com: -0.105D+00 0.152D+01
 Coeff:      0.380D+00-0.992D+00-0.539D+00 0.120D+01 0.391D-01 0.105D+01
 Coeff:     -0.180D+01 0.397D+01-0.378D+01 0.168D+01-0.455D+00-0.315D+01
 Coeff:      0.127D+01 0.221D+01-0.412D+00-0.321D+00-0.714D+00-0.509D-01
 Coeff:     -0.105D+00 0.152D+01
 Gap=     0.285 Goal=   None    Shift=    0.000
 Gap=     0.165 Goal=   None    Shift=    0.000
 RMSDP=3.09D-04 MaxDP=2.41D-02 DE=-1.21D-05 OVMax= 3.54D-02

 Cycle  73  Pass 1  IDiag  1:
 RMSU=  2.52D-05    CP:  1.00D+00  3.00D+00  3.92D-01 -4.29D-01  1.87D+00
                    CP: -1.15D+00  1.30D+00 -1.46D+00 -1.29D+00 -1.83D-01
                    CP:  6.39D-01  1.50D+00
 E= -732.197624961658     Delta-E=        0.000000612673 Rises=F Damp=F
 DIIS: error= 3.82D-05 at cycle  73 NSaved=  20.
 NSaved=20 IEnMin= 9 EnMin= -732.198663453547     IErMin=20 ErrMin= 3.82D-05
 ErrMax= 3.82D-05  0.00D+00 EMaxC= 1.00D-01 BMatC= 2.01D-06 BMatP= 2.18D-06
 IDIUse=1 WtCom= 1.00D+00 WtEn= 0.00D+00
 Coeff-Com:  0.294D+00-0.884D+00-0.719D+00 0.141D+01 0.980D+00 0.405D+00
 Coeff-Com: -0.410D+01 0.146D+01-0.568D-01 0.201D+01 0.705D+00-0.358D+01
 Coeff-Com:  0.552D+00 0.233D+01 0.386D+00-0.598D+00-0.873D+00-0.609D-01
 Coeff-Com:  0.597D+00 0.754D+00
 Coeff:      0.294D+00-0.884D+00-0.719D+00 0.141D+01 0.980D+00 0.405D+00
 Coeff:     -0.410D+01 0.146D+01-0.568D-01 0.201D+01 0.705D+00-0.358D+01
 Coeff:      0.552D+00 0.233D+01 0.386D+00-0.598D+00-0.873D+00-0.609D-01
 Coeff:      0.597D+00 0.754D+00
 Gap=     0.285 Goal=   None    Shift=    0.000
 Gap=     0.165 Goal=   None    Shift=    0.000
 RMSDP=1.55D-04 MaxDP=1.45D-02 DE= 6.13D-07 OVMax= 8.54D-03

 Cycle  74  Pass 1  IDiag  1:
 RMSU=  8.57D-06    CP:  1.00D+00  3.00D+00  3.07D-01 -3.46D-01  1.37D+00
                    CP: -1.02D+00  1.03D+00 -1.00D+00 -1.18D+00 -3.72D-01
                    CP:  5.58D-01  1.50D+00  9.39D-01
 E= -732.197634681399     Delta-E=       -0.000009719741 Rises=F Damp=F
 DIIS: error= 4.57D-05 at cycle  74 NSaved=  20.
 NSaved=20 IEnMin= 9 EnMin= -732.198663453547     IErMin=19 ErrMin= 3.82D-05
 ErrMax= 4.57D-05  0.00D+00 EMaxC= 1.00D-01 BMatC= 2.34D-06 BMatP= 2.01D-06
 IDIUse=1 WtCom= 1.00D+00 WtEn= 0.00D+00
 Coeff-Com:  0.155D+00-0.411D+00-0.667D+00 0.940D+00 0.587D+00 0.187D+00
 Coeff-Com: -0.280D+01 0.228D+01-0.138D+01 0.189D+01 0.861D+00-0.351D+01
 Coeff-Com:  0.428D+00 0.222D+01 0.175D+00-0.616D+00-0.671D+00 0.439D+00
 Coeff-Com: -0.116D+00 0.102D+01
 Coeff:      0.155D+00-0.411D+00-0.667D+00 0.940D+00 0.587D+00 0.187D+00
 Coeff:     -0.280D+01 0.228D+01-0.138D+01 0.189D+01 0.861D+00-0.351D+01
 Coeff:      0.428D+00 0.222D+01 0.175D+00-0.616D+00-0.671D+00 0.439D+00
 Coeff:     -0.116D+00 0.102D+01
 Gap=     0.285 Goal=   None    Shift=    0.000
 Gap=     0.165 Goal=   None    Shift=    0.000
 RMSDP=1.46D-04 MaxDP=1.02D-02 DE=-9.72D-06 OVMax= 1.24D-02

 Cycle  75  Pass 1  IDiag  1:
 RMSU=  5.93D-06    CP:  1.00D+00  3.00D+00  1.59D-01 -5.48D-01  1.04D+00
                    CP: -5.81D-01  8.32D-01 -8.31D-01 -1.01D+00 -3.53D-01
                    CP:  4.77D-01  1.07D+00  1.11D+00  8.39D-01
 E= -732.197641511272     Delta-E=       -0.000006829873 Rises=F Damp=F
 DIIS: error= 3.11D-05 at cycle  75 NSaved=  20.
 NSaved=20 IEnMin= 9 EnMin= -732.198663453547     IErMin=20 ErrMin= 3.11D-05
 ErrMax= 3.11D-05  0.00D+00 EMaxC= 1.00D-01 BMatC= 1.39D-06 BMatP= 2.34D-06
 IDIUse=1 WtCom= 1.00D+00 WtEn= 0.00D+00
 Coeff-Com:  0.209D+00-0.570D+00-0.637D+00 0.100D+01 0.754D+00 0.228D+00
 Coeff-Com: -0.289D+01 0.227D+01-0.134D+01 0.134D+01 0.591D+00-0.251D+01
 Coeff-Com:  0.461D+00 0.166D+01 0.320D+00-0.372D+00-0.766D+00 0.216D+00
 Coeff-Com:  0.678D-01 0.965D+00
 Coeff:      0.209D+00-0.570D+00-0.637D+00 0.100D+01 0.754D+00 0.228D+00
 Coeff:     -0.289D+01 0.227D+01-0.134D+01 0.134D+01 0.591D+00-0.251D+01
 Coeff:      0.461D+00 0.166D+01 0.320D+00-0.372D+00-0.766D+00 0.216D+00
 Coeff:      0.678D-01 0.965D+00
 Gap=     0.285 Goal=   None    Shift=    0.000
 Gap=     0.165 Goal=   None    Shift=    0.000
 RMSDP=1.25D-04 MaxDP=1.04D-02 DE=-6.83D-06 OVMax= 9.14D-03

 Cycle  76  Pass 1  IDiag  1:
 RMSU=  4.36D-06    CP:  1.00D+00  3.00D+00  4.99D-02 -7.28D-01  7.45D-01
                    CP: -4.09D-01  6.07D-01 -3.28D-01 -1.09D+00 -3.88D-01
                    CP:  1.65D-01  1.37D+00  9.45D-01  1.13D+00  1.15D+00
 E= -732.197647581016     Delta-E=       -0.000006069745 Rises=F Damp=F
 DIIS: error= 2.90D-05 at cycle  76 NSaved=  20.
 NSaved=20 IEnMin= 9 EnMin= -732.198663453547     IErMin=20 ErrMin= 2.90D-05
 ErrMax= 2.90D-05  0.00D+00 EMaxC= 1.00D-01 BMatC= 1.08D-06 BMatP= 1.39D-06
 IDIUse=1 WtCom= 1.00D+00 WtEn= 0.00D+00
 Coeff-Com:  0.245D+00-0.695D+00-0.448D+00 0.102D+01 0.394D+00 0.534D-01
 Coeff-Com: -0.239D+01 0.425D+01-0.350D+01 0.168D+01 0.925D+00-0.271D+01
 Coeff-Com: -0.105D+00 0.134D+01 0.617D+00-0.146D+00-0.689D+00 0.104D+00
 Coeff-Com:  0.290D+00 0.774D+00
 Coeff:      0.245D+00-0.695D+00-0.448D+00 0.102D+01 0.394D+00 0.534D-01
 Coeff:     -0.239D+01 0.425D+01-0.350D+01 0.168D+01 0.925D+00-0.271D+01
 Coeff:     -0.105D+00 0.134D+01 0.617D+00-0.146D+00-0.689D+00 0.104D+00
 Coeff:      0.290D+00 0.774D+00
 Gap=     0.285 Goal=   None    Shift=    0.000
 Gap=     0.165 Goal=   None    Shift=    0.000
 RMSDP=8.08D-05 MaxDP=5.28D-03 DE=-6.07D-06 OVMax= 8.38D-03

 Cycle  77  Pass 1  IDiag  1:
 RMSU=  4.26D-06    CP:  1.00D+00  3.00D+00 -4.07D-02 -8.12D-01  6.04D-01
                    CP: -1.69D-01  4.81D-01 -1.09D-01 -9.32D-01 -2.85D-01
                    CP:  9.06D-02  1.06D+00  9.81D-01  1.06D+00  1.36D+00
                    CP:  1.18D+00
 E= -732.197649773058     Delta-E=       -0.000002192042 Rises=F Damp=F
 DIIS: error= 2.40D-05 at cycle  77 NSaved=  20.
 NSaved=20 IEnMin= 9 EnMin= -732.198663453547     IErMin=20 ErrMin= 2.40D-05
 ErrMax= 2.40D-05  0.00D+00 EMaxC= 1.00D-01 BMatC= 7.74D-07 BMatP= 1.08D-06
 IDIUse=1 WtCom= 1.00D+00 WtEn= 0.00D+00
 Coeff-Com:  0.192D+00-0.676D+00-0.350D+00 0.973D+00 0.442D+00-0.116D+00
 Coeff-Com: -0.222D+01 0.394D+01-0.312D+01 0.129D+01 0.817D+00-0.206D+01
 Coeff-Com: -0.829D-01 0.913D+00 0.442D+00 0.136D+00-0.621D+00 0.166D-01
 Coeff-Com:  0.108D-01 0.108D+01
 Coeff:      0.192D+00-0.676D+00-0.350D+00 0.973D+00 0.442D+00-0.116D+00
 Coeff:     -0.222D+01 0.394D+01-0.312D+01 0.129D+01 0.817D+00-0.206D+01
 Coeff:     -0.829D-01 0.913D+00 0.442D+00 0.136D+00-0.621D+00 0.166D-01
 Coeff:      0.108D-01 0.108D+01
 Gap=     0.285 Goal=   None    Shift=    0.000
 Gap=     0.165 Goal=   None    Shift=    0.000
 RMSDP=1.09D-04 MaxDP=8.37D-03 DE=-2.19D-06 OVMax= 9.64D-03

 Cycle  78  Pass 1  IDiag  1:
 RMSU=  2.19D-06    CP:  1.00D+00  3.00D+00 -1.48D-01 -9.28D-01  3.69D-01
                    CP:  6.79D-02  2.84D-01  2.53D-01 -7.26D-01 -1.75D-01
                    CP: -8.89D-02  8.87D-01  7.68D-01  1.20D+00  1.41D+00
                    CP:  2.04D+00  2.00D+00
 E= -732.197653341099     Delta-E=       -0.000003568042 Rises=F Damp=F
 DIIS: error= 2.38D-05 at cycle  78 NSaved=  20.
 NSaved=20 IEnMin= 9 EnMin= -732.198663453547     IErMin=20 ErrMin= 2.38D-05
 ErrMax= 2.38D-05  0.00D+00 EMaxC= 1.00D-01 BMatC= 6.74D-07 BMatP= 7.74D-07
 IDIUse=1 WtCom= 1.00D+00 WtEn= 0.00D+00
 Coeff-Com:  0.188D+00-0.689D+00-0.218D+00 0.879D+00 0.243D+00-0.200D+00
 Coeff-Com: -0.170D+01 0.472D+01-0.417D+01 0.133D+01 0.971D+00-0.180D+01
 Coeff-Com: -0.458D+00 0.463D+00 0.562D+00 0.404D+00-0.526D+00-0.891D-01
 Coeff-Com:  0.134D+00 0.964D+00
 Coeff:      0.188D+00-0.689D+00-0.218D+00 0.879D+00 0.243D+00-0.200D+00
 Coeff:     -0.170D+01 0.472D+01-0.417D+01 0.133D+01 0.971D+00-0.180D+01
 Coeff:     -0.458D+00 0.463D+00 0.562D+00 0.404D+00-0.526D+00-0.891D-01
 Coeff:      0.134D+00 0.964D+00
 Gap=     0.285 Goal=   None    Shift=    0.000
 Gap=     0.165 Goal=   None    Shift=    0.000
 RMSDP=7.04D-05 MaxDP=6.10D-03 DE=-3.57D-06 OVMax= 5.09D-03

 Cycle  79  Pass 1  IDiag  1:
 RMSU=  2.42D-06    CP:  1.00D+00  3.00D+00 -1.95D-01 -9.67D-01  1.96D-01
                    CP:  2.90D-01  1.32D-01  4.68D-01 -5.13D-01 -6.93D-02
                    CP: -2.04D-01  6.46D-01  6.40D-01  1.07D+00  1.74D+00
                    CP:  2.34D+00  3.00D+00  1.47D+00
 E= -732.197656251156     Delta-E=       -0.000002910057 Rises=F Damp=F
 DIIS: error= 2.03D-05 at cycle  79 NSaved=  20.
 NSaved=20 IEnMin= 9 EnMin= -732.198663453547     IErMin=20 ErrMin= 2.03D-05
 ErrMax= 2.03D-05  0.00D+00 EMaxC= 1.00D-01 BMatC= 4.75D-07 BMatP= 6.74D-07
 IDIUse=1 WtCom= 1.00D+00 WtEn= 0.00D+00
 Coeff-Com:  0.935D-01-0.426D+00-0.251D+00 0.681D+00 0.414D+00-0.233D+00
 Coeff-Com: -0.168D+01 0.265D+01-0.196D+01 0.820D+00 0.700D+00-0.122D+01
 Coeff-Com: -0.115D+00 0.387D+00 0.161D+00 0.364D+00-0.407D+00-0.420D-01
 Coeff-Com:  0.615D-01 0.101D+01
 Coeff:      0.935D-01-0.426D+00-0.251D+00 0.681D+00 0.414D+00-0.233D+00
 Coeff:     -0.168D+01 0.265D+01-0.196D+01 0.820D+00 0.700D+00-0.122D+01
 Coeff:     -0.115D+00 0.387D+00 0.161D+00 0.364D+00-0.407D+00-0.420D-01
 Coeff:      0.615D-01 0.101D+01
 Gap=     0.285 Goal=   None    Shift=    0.000
 Gap=     0.165 Goal=   None    Shift=    0.000
 RMSDP=7.64D-05 MaxDP=6.77D-03 DE=-2.91D-06 OVMax= 4.99D-03

 Cycle  80  Pass 1  IDiag  1:
 RMSU=  3.67D-06    CP:  1.00D+00  3.00D+00 -2.46D-01 -9.93D-01 -1.28D-02
                    CP:  4.96D-01 -1.68D-02  6.32D-01 -2.34D-01  1.52D-02
                    CP: -2.56D-01  3.33D-01  3.33D-01  1.15D+00  1.82D+00
                    CP:  3.00D+00  3.00D+00  2.82D+00  2.26D+00
 E= -732.197658677473     Delta-E=       -0.000002426317 Rises=F Damp=F
 DIIS: error= 1.97D-05 at cycle  80 NSaved=  20.
 NSaved=20 IEnMin= 9 EnMin= -732.198663453547     IErMin=20 ErrMin= 1.97D-05
 ErrMax= 1.97D-05  0.00D+00 EMaxC= 1.00D-01 BMatC= 3.89D-07 BMatP= 4.75D-07
 IDIUse=1 WtCom= 1.00D+00 WtEn= 0.00D+00
 Coeff-Com: -0.522D-01 0.804D-01-0.150D+00 0.523D-01 0.315D+00-0.106D+00
 Coeff-Com: -0.598D+00-0.267D+00 0.494D+00-0.965D-02 0.302D+00 0.338D-01
 Coeff-Com:  0.282D-01-0.128D+00-0.222D+00 0.317D+00-0.612D-01-0.148D+01
 Coeff-Com:  0.374D+00 0.208D+01
 Coeff:     -0.522D-01 0.804D-01-0.150D+00 0.523D-01 0.315D+00-0.106D+00
 Coeff:     -0.598D+00-0.267D+00 0.494D+00-0.965D-02 0.302D+00 0.338D-01
 Coeff:      0.282D-01-0.128D+00-0.222D+00 0.317D+00-0.612D-01-0.148D+01
 Coeff:      0.374D+00 0.208D+01
 Gap=     0.285 Goal=   None    Shift=    0.000
 Gap=     0.165 Goal=   None    Shift=    0.000
 RMSDP=1.79D-04 MaxDP=1.70D-02 DE=-2.43D-06 OVMax= 1.02D-02

 Cycle  81  Pass 1  IDiag  1:
 Restarting incremental Fock formation.
 E= -732.197663328600     Delta-E=       -0.000004651127 Rises=F Damp=F
 DIIS: error= 1.52D-05 at cycle  81 NSaved=  20.
 NSaved=20 IEnMin= 9 EnMin= -732.198663453547     IErMin=20 ErrMin= 1.52D-05
 ErrMax= 1.52D-05  0.00D+00 EMaxC= 1.00D-01 BMatC= 2.17D-07 BMatP= 3.89D-07
 IDIUse=1 WtCom= 1.00D+00 WtEn= 0.00D+00
 Coeff-Com: -0.327D-01 0.849D-01-0.192D+00 0.623D-01 0.343D+00-0.209D-01
 Coeff-Com: -0.864D+00-0.263D+00 0.554D+00 0.205D+00 0.434D+00-0.468D+00
 Coeff-Com: -0.797D-02 0.289D+00 0.186D-01-0.731D-01-0.744D-01 0.332D-01
 Coeff-Com:  0.123D+00 0.848D+00
 Coeff:     -0.327D-01 0.849D-01-0.192D+00 0.623D-01 0.343D+00-0.209D-01
 Coeff:     -0.864D+00-0.263D+00 0.554D+00 0.205D+00 0.434D+00-0.468D+00
 Coeff:     -0.797D-02 0.289D+00 0.186D-01-0.731D-01-0.744D-01 0.332D-01
 Coeff:      0.123D+00 0.848D+00
 Gap=     0.285 Goal=   None    Shift=    0.000
 Gap=     0.165 Goal=   None    Shift=    0.000
 RMSDP=3.85D-05 MaxDP=2.96D-03 DE=-4.65D-06 OVMax= 4.90D-03

 Cycle  82  Pass 1  IDiag  1:
 RMSU=  3.80D-05    CP:  1.00D+00
 E= -732.197663821582     Delta-E=       -0.000000492982 Rises=F Damp=F
 DIIS: error= 2.32D-05 at cycle  82 NSaved=  20.
 NSaved=20 IEnMin= 9 EnMin= -732.198663453547     IErMin=19 ErrMin= 1.52D-05
 ErrMax= 2.32D-05  0.00D+00 EMaxC= 1.00D-01 BMatC= 3.25D-07 BMatP= 2.17D-07
 IDIUse=1 WtCom= 1.00D+00 WtEn= 0.00D+00
 Coeff-Com: -0.378D-01 0.107D+00-0.191D+00 0.346D-01 0.342D+00-0.101D-01
 Coeff-Com: -0.781D+00-0.433D+00 0.687D+00 0.130D+00 0.350D+00-0.313D+00
 Coeff-Com:  0.474D-01 0.205D+00-0.731D-01-0.850D-03-0.636D-01 0.123D+00
 Coeff-Com:  0.118D+01-0.303D+00
 Coeff:     -0.378D-01 0.107D+00-0.191D+00 0.346D-01 0.342D+00-0.101D-01
 Coeff:     -0.781D+00-0.433D+00 0.687D+00 0.130D+00 0.350D+00-0.313D+00
 Coeff:      0.474D-01 0.205D+00-0.731D-01-0.850D-03-0.636D-01 0.123D+00
 Coeff:      0.118D+01-0.303D+00
 Gap=     0.285 Goal=   None    Shift=    0.000
 Gap=     0.165 Goal=   None    Shift=    0.000
 RMSDP=8.42D-06 MaxDP=7.92D-04 DE=-4.93D-07 OVMax= 1.30D-03

 Error on total polarization charges =  0.04633
 SCF Done:  E(UM062X) =  -732.197663822     A.U. after   82 cycles
            NFock= 82  Conv=0.84D-05     -V/T= 2.0648
 <Sx>= 0.0000 <Sy>= 0.0000 <Sz>= 1.5000 <S**2>= 4.7399 S= 1.7338
 <L.S>=  0.00000000000    
 KE= 6.876697257285D+02 PE=-3.310839223671D+03 EE= 1.065257984258D+03
 SMD-CDS (non-electrostatic) energy       (kcal/mol) =       6.68
 (included in total energy above)
 Annihilation of the first spin contaminant:
 S**2 before annihilation     4.7399,   after     3.7843
 Leave Link  502 at Wed May 31 23:02:09 2023, MaxMem=  2684354560 cpu:            3970.3 elap:             398.3
 (Enter /home/xut/apps/g16/l601.exe)
 Copying SCF densities to generalized density rwf, IOpCl= 1 IROHF=0.

 **********************************************************************

            Population analysis using the SCF density.

 **********************************************************************

 Orbital symmetries:
 Alpha Orbitals:
       Occupied  (A) (A) (A) (A) (A) (A) (A) (A) (A) (A) (A) (A)
                 (A) (A) (A) (A) (A) (A) (A) (A) (A) (A) (A) (A)
                 (A) (A) (A) (A) (A) (A) (A) (A) (A) (A) (A) (A)
                 (A) (A) (A) (A) (A) (A) (A) (A) (A) (A) (A) (A)
                 (A) (A) (A)
       Virtual   (A) (A) (A) (A) (A) (A) (A) (A) (A) (A) (A) (A)
                 (A) (A) (A) (A) (A) (A) (A) (A) (A) (A) (A) (A)
                 (A) (A) (A) (A) (A) (A) (A) (A) (A) (A) (A) (A)
                 (A) (A) (A) (A) (A) (A) (A) (A) (A) (A) (A) (A)
                 (A) (A) (A) (A) (A) (A) (A) (A) (A) (A) (A) (A)
                 (A) (A) (A) (A) (A) (A) (A) (A) (A) (A) (A) (A)
                 (A) (A) (A) (A) (A) (A) (A) (A) (A) (A) (A) (A)
                 (A) (A) (A) (A) (A) (A) (A) (A) (A) (A) (A) (A)
                 (A) (A) (A) (A) (A) (A) (A) (A) (A) (A) (A) (A)
                 (A) (A) (A) (A) (A) (A) (A) (A) (A) (A) (A) (A)
                 (A) (A) (A) (A) (A) (A) (A) (A) (A) (A) (A) (A)
                 (A) (A) (A) (A) (A) (A) (A) (A) (A) (A) (A) (A)
                 (A) (A) (A) (A) (A) (A) (A) (A) (A) (A) (A) (A)
                 (A) (A) (A) (A) (A) (A) (A) (A) (A) (A) (A) (A)
                 (A) (A) (A) (A) (A) (A) (A) (A) (A) (A) (A) (A)
                 (A) (A) (A) (A) (A) (A) (A) (A) (A) (A) (A) (A)
                 (A) (A) (A) (A) (A) (A) (A) (A) (A) (A) (A) (A)
                 (A) (A) (A) (A) (A) (A) (A) (A) (A) (A) (A) (A)
                 (A) (A) (A) (A) (A) (A) (A) (A) (A) (A) (A) (A)
                 (A) (A) (A) (A) (A) (A) (A) (A) (A) (A) (A) (A)
                 (A) (A) (A) (A) (A) (A) (A) (A) (A) (A) (A) (A)
                 (A) (A) (A) (A) (A) (A) (A) (A) (A) (A) (A) (A)
                 (A) (A) (A) (A) (A) (A) (A) (A) (A) (A) (A) (A)
 Beta  Orbitals:
       Occupied  (A) (A) (A) (A) (A) (A) (A) (A) (A) (A) (A) (A)
                 (A) (A) (A) (A) (A) (A) (A) (A) (A) (A) (A) (A)
                 (A) (A) (A) (A) (A) (A) (A) (A) (A) (A) (A) (A)
                 (A) (A) (A) (A) (A) (A) (A) (A) (A) (A) (A) (A)
       Virtual   (A) (A) (A) (A) (A) (A) (A) (A) (A) (A) (A) (A)
                 (A) (A) (A) (A) (A) (A) (A) (A) (A) (A) (A) (A)
                 (A) (A) (A) (A) (A) (A) (A) (A) (A) (A) (A) (A)
                 (A) (A) (A) (A) (A) (A) (A) (A) (A) (A) (A) (A)
                 (A) (A) (A) (A) (A) (A) (A) (A) (A) (A) (A) (A)
                 (A) (A) (A) (A) (A) (A) (A) (A) (A) (A) (A) (A)
                 (A) (A) (A) (A) (A) (A) (A) (A) (A) (A) (A) (A)
                 (A) (A) (A) (A) (A) (A) (A) (A) (A) (A) (A) (A)
                 (A) (A) (A) (A) (A) (A) (A) (A) (A) (A) (A) (A)
                 (A) (A) (A) (A) (A) (A) (A) (A) (A) (A) (A) (A)
                 (A) (A) (A) (A) (A) (A) (A) (A) (A) (A) (A) (A)
                 (A) (A) (A) (A) (A) (A) (A) (A) (A) (A) (A) (A)
                 (A) (A) (A) (A) (A) (A) (A) (A) (A) (A) (A) (A)
                 (A) (A) (A) (A) (A) (A) (A) (A) (A) (A) (A) (A)
                 (A) (A) (A) (A) (A) (A) (A) (A) (A) (A) (A) (A)
                 (A) (A) (A) (A) (A) (A) (A) (A) (A) (A) (A) (A)
                 (A) (A) (A) (A) (A) (A) (A) (A) (A) (A) (A) (A)
                 (A) (A) (A) (A) (A) (A) (A) (A) (A) (A) (A) (A)
                 (A) (A) (A) (A) (A) (A) (A) (A) (A) (A) (A) (A)
                 (A) (A) (A) (A) (A) (A) (A) (A) (A) (A) (A) (A)
                 (A) (A) (A) (A) (A) (A) (A) (A) (A) (A) (A) (A)
                 (A) (A) (A) (A) (A) (A) (A) (A) (A) (A) (A) (A)
                 (A) (A) (A) (A) (A) (A) (A) (A) (A) (A) (A) (A)
                 (A) (A) (A)
 The electronic state is 4-A.
 Alpha  occ. eigenvalues --  -19.73041 -19.70980 -19.70807 -19.70324 -19.64221
 Alpha  occ. eigenvalues --  -10.72953 -10.71387 -10.68529 -10.66292 -10.63465
 Alpha  occ. eigenvalues --  -10.63383 -10.61920  -3.12298  -2.08403  -2.02587
 Alpha  occ. eigenvalues --   -2.02156  -1.27914  -1.26951  -1.26430  -1.21463
 Alpha  occ. eigenvalues --   -1.15647  -1.03006  -0.92827  -0.90382  -0.80806
 Alpha  occ. eigenvalues --   -0.79112  -0.76700  -0.73700  -0.68938  -0.65949
 Alpha  occ. eigenvalues --   -0.65681  -0.62760  -0.60046  -0.58502  -0.56645
 Alpha  occ. eigenvalues --   -0.56447  -0.55527  -0.55062  -0.51949  -0.50621
 Alpha  occ. eigenvalues --   -0.50096  -0.48252  -0.47280  -0.46121  -0.41555
 Alpha  occ. eigenvalues --   -0.39302  -0.38997  -0.38898  -0.38501  -0.34632
 Alpha  occ. eigenvalues --   -0.34118
 Alpha virt. eigenvalues --   -0.05614  -0.03793  -0.03219  -0.02257  -0.01323
 Alpha virt. eigenvalues --    0.00071   0.00586   0.01462   0.01739   0.02239
 Alpha virt. eigenvalues --    0.03704   0.04514   0.04845   0.05726   0.06004
 Alpha virt. eigenvalues --    0.06070   0.07001   0.08123   0.08352   0.08808
 Alpha virt. eigenvalues --    0.09403   0.10447   0.10497   0.10635   0.11133
 Alpha virt. eigenvalues --    0.11398   0.12017   0.13490   0.13696   0.13864
 Alpha virt. eigenvalues --    0.14081   0.14529   0.15038   0.16079   0.16593
 Alpha virt. eigenvalues --    0.16905   0.17375   0.17842   0.18112   0.18908
 Alpha virt. eigenvalues --    0.19253   0.19759   0.20625   0.21200   0.22201
 Alpha virt. eigenvalues --    0.22662   0.23367   0.23949   0.24731   0.25056
 Alpha virt. eigenvalues --    0.25320   0.26039   0.26451   0.26997   0.28030
 Alpha virt. eigenvalues --    0.28494   0.29197   0.29451   0.29772   0.29962
 Alpha virt. eigenvalues --    0.30423   0.31251   0.31821   0.32176   0.32953
 Alpha virt. eigenvalues --    0.34368   0.34740   0.35247   0.35698   0.36351
 Alpha virt. eigenvalues --    0.37594   0.38524   0.38771   0.39877   0.41117
 Alpha virt. eigenvalues --    0.41566   0.42821   0.44088   0.44572   0.46600
 Alpha virt. eigenvalues --    0.48717   0.51200   0.51833   0.53010   0.55116
 Alpha virt. eigenvalues --    0.56539   0.57866   0.58299   0.59620   0.60719
 Alpha virt. eigenvalues --    0.61049   0.62681   0.63265   0.64130   0.64631
 Alpha virt. eigenvalues --    0.65648   0.66470   0.68634   0.69592   0.69908
 Alpha virt. eigenvalues --    0.70593   0.71508   0.72361   0.75800   0.76488
 Alpha virt. eigenvalues --    0.77845   0.80046   0.81712   0.83097   0.85688
 Alpha virt. eigenvalues --    0.87437   0.88261   0.88950   0.89704   0.92672
 Alpha virt. eigenvalues --    0.94224   0.96357   0.96687   0.98897   0.99645
 Alpha virt. eigenvalues --    1.00755   1.01915   1.04638   1.05797   1.06522
 Alpha virt. eigenvalues --    1.07779   1.09286   1.10786   1.11241   1.12054
 Alpha virt. eigenvalues --    1.15908   1.16165   1.17998   1.18569   1.19955
 Alpha virt. eigenvalues --    1.21036   1.23363   1.24216   1.26389   1.26848
 Alpha virt. eigenvalues --    1.29119   1.31390   1.32341   1.33109   1.36424
 Alpha virt. eigenvalues --    1.39372   1.45683   1.46172   1.46574   1.46941
 Alpha virt. eigenvalues --    1.47509   1.51837   1.52432   1.52865   1.55782
 Alpha virt. eigenvalues --    1.58496   1.58830   1.60825   1.61871   1.63346
 Alpha virt. eigenvalues --    1.64706   1.68156   1.70759   1.71297   1.73890
 Alpha virt. eigenvalues --    1.75845   1.79553   1.81740   1.85397   1.86007
 Alpha virt. eigenvalues --    1.86630   1.88477   1.90539   1.92370   1.92770
 Alpha virt. eigenvalues --    1.95728   1.99019   2.00319   2.02982   2.08278
 Alpha virt. eigenvalues --    2.09715   2.12223   2.13267   2.14382   2.17645
 Alpha virt. eigenvalues --    2.21403   2.23731   2.24796   2.29395   2.35361
 Alpha virt. eigenvalues --    2.37906   2.52317   2.56321   2.58351   2.59723
 Alpha virt. eigenvalues --    2.61645   2.64417   2.65665   2.67821   2.69326
 Alpha virt. eigenvalues --    2.72254   2.73647   2.74434   2.74777   2.80795
 Alpha virt. eigenvalues --    2.82996   2.85156   2.93603   2.94426   2.97408
 Alpha virt. eigenvalues --    3.05311   3.05854   3.06250   3.06783   3.07064
 Alpha virt. eigenvalues --    3.09255   3.11549   3.15699   3.16049   3.18112
 Alpha virt. eigenvalues --    3.19458   3.25660   3.27807   3.28094   3.29918
 Alpha virt. eigenvalues --    3.32617   3.35451   3.37432   3.42870   3.45346
 Alpha virt. eigenvalues --    3.46527   3.52135   3.55396   3.61635   3.62209
 Alpha virt. eigenvalues --    3.72120   3.77616   3.88587   3.94895   3.95828
 Alpha virt. eigenvalues --    4.00369   4.07078   4.10763   4.15119   4.17372
 Alpha virt. eigenvalues --    4.19958   4.28500   4.74098   5.04434   5.05043
 Alpha virt. eigenvalues --    5.07217   5.12368   5.14442   5.26872   5.41194
 Alpha virt. eigenvalues --    5.43560   5.45601   5.46974   5.68381   5.73854
 Alpha virt. eigenvalues --    5.92318   5.94236   5.98871   7.05866  23.58168
 Alpha virt. eigenvalues --   23.78412  23.81036  23.93918  24.03267  24.14575
 Alpha virt. eigenvalues --   24.21072  49.95521  49.96322  50.03240  50.06049
 Alpha virt. eigenvalues --   50.10191
  Beta  occ. eigenvalues --  -19.72714 -19.70993 -19.70657 -19.70328 -19.64240
  Beta  occ. eigenvalues --  -10.72945 -10.71304 -10.68534 -10.66331 -10.63289
  Beta  occ. eigenvalues --  -10.63103 -10.62031  -3.02675  -1.97399  -1.96100
  Beta  occ. eigenvalues --   -1.84779  -1.27099  -1.26956  -1.25969  -1.21397
  Beta  occ. eigenvalues --   -1.15691  -1.02133  -0.92687  -0.88805  -0.80183
  Beta  occ. eigenvalues --   -0.78768  -0.76507  -0.73433  -0.68594  -0.65660
  Beta  occ. eigenvalues --   -0.65506  -0.62126  -0.59155  -0.57678  -0.56586
  Beta  occ. eigenvalues --   -0.56224  -0.54748  -0.52955  -0.51570  -0.50265
  Beta  occ. eigenvalues --   -0.49586  -0.47754  -0.47120  -0.43383  -0.41016
  Beta  occ. eigenvalues --   -0.39311  -0.35249  -0.33712
  Beta virt. eigenvalues --   -0.17239  -0.04054  -0.03841  -0.01040  -0.00636
  Beta virt. eigenvalues --   -0.00248   0.00434   0.01688   0.01954   0.02203
  Beta virt. eigenvalues --    0.02771   0.03413   0.03625   0.03850   0.04543
  Beta virt. eigenvalues --    0.04721   0.05697   0.06004   0.06509   0.07039
  Beta virt. eigenvalues --    0.08023   0.08195   0.08694   0.09062   0.09951
  Beta virt. eigenvalues --    0.10306   0.10467   0.10899   0.11064   0.11555
  Beta virt. eigenvalues --    0.13075   0.13463   0.13528   0.13981   0.14430
  Beta virt. eigenvalues --    0.15042   0.15895   0.16585   0.16882   0.17361
  Beta virt. eigenvalues --    0.18068   0.18939   0.19002   0.19413   0.19577
  Beta virt. eigenvalues --    0.20779   0.21247   0.22027   0.22386   0.23105
  Beta virt. eigenvalues --    0.23828   0.24820   0.24862   0.25148   0.26000
  Beta virt. eigenvalues --    0.26387   0.27192   0.28206   0.28728   0.29331
  Beta virt. eigenvalues --    0.29413   0.29829   0.30103   0.30502   0.31239
  Beta virt. eigenvalues --    0.31955   0.32157   0.33031   0.34488   0.34623
  Beta virt. eigenvalues --    0.35447   0.35749   0.36316   0.37468   0.38594
  Beta virt. eigenvalues --    0.38837   0.39824   0.41171   0.41636   0.42816
  Beta virt. eigenvalues --    0.44256   0.44890   0.46633   0.48747   0.51266
  Beta virt. eigenvalues --    0.52245   0.53378   0.55295   0.57134   0.57708
  Beta virt. eigenvalues --    0.58234   0.59159   0.60155   0.60597   0.61400
  Beta virt. eigenvalues --    0.61655   0.63598   0.64688   0.65862   0.65950
  Beta virt. eigenvalues --    0.67779   0.68531   0.70299   0.71057   0.71772
  Beta virt. eigenvalues --    0.72193   0.75752   0.76344   0.76803   0.79288
  Beta virt. eigenvalues --    0.81780   0.83145   0.85542   0.87769   0.88683
  Beta virt. eigenvalues --    0.89019   0.90013   0.92840   0.94049   0.96153
  Beta virt. eigenvalues --    0.97792   0.98819   0.99611   1.01307   1.01820
  Beta virt. eigenvalues --    1.04775   1.05969   1.06546   1.08371   1.10495
  Beta virt. eigenvalues --    1.10772   1.12025   1.12880   1.16133   1.16461
  Beta virt. eigenvalues --    1.17953   1.18504   1.19804   1.21322   1.23336
  Beta virt. eigenvalues --    1.24239   1.26370   1.26759   1.29073   1.31139
  Beta virt. eigenvalues --    1.32431   1.33031   1.36244   1.40247   1.45899
  Beta virt. eigenvalues --    1.46757   1.46872   1.47235   1.47736   1.52039
  Beta virt. eigenvalues --    1.53045   1.53127   1.56520   1.59192   1.59470
  Beta virt. eigenvalues --    1.61239   1.62127   1.63583   1.65096   1.68407
  Beta virt. eigenvalues --    1.71308   1.71684   1.74535   1.76105   1.80064
  Beta virt. eigenvalues --    1.83143   1.85763   1.86431   1.87206   1.88750
  Beta virt. eigenvalues --    1.90936   1.92715   1.94109   1.95970   1.99601
  Beta virt. eigenvalues --    2.00829   2.03666   2.08530   2.10073   2.12752
  Beta virt. eigenvalues --    2.13912   2.14939   2.18255   2.21495   2.24325
  Beta virt. eigenvalues --    2.25565   2.30215   2.36139   2.38511   2.53423
  Beta virt. eigenvalues --    2.56555   2.58810   2.60923   2.62787   2.64794
  Beta virt. eigenvalues --    2.65832   2.68051   2.70463   2.73756   2.74787
  Beta virt. eigenvalues --    2.75924   2.76111   2.81385   2.85205   2.86753
  Beta virt. eigenvalues --    2.93473   2.94512   2.97687   3.06150   3.06324
  Beta virt. eigenvalues --    3.06786   3.07392   3.07718   3.09681   3.11717
  Beta virt. eigenvalues --    3.15881   3.16261   3.18456   3.19680   3.26386
  Beta virt. eigenvalues --    3.27842   3.28405   3.30339   3.33094   3.35422
  Beta virt. eigenvalues --    3.38020   3.43248   3.45808   3.46757   3.52206
  Beta virt. eigenvalues --    3.55827   3.62505   3.62893   3.72791   3.77942
  Beta virt. eigenvalues --    3.88680   3.94906   3.96190   4.00536   4.08633
  Beta virt. eigenvalues --    4.12064   4.15404   4.18353   4.20549   4.28689
  Beta virt. eigenvalues --    4.76431   5.04675   5.05835   5.07911   5.12308
  Beta virt. eigenvalues --    5.14632   5.26832   5.41437   5.43575   5.45775
  Beta virt. eigenvalues --    5.47141   5.68362   5.73915   5.92530   5.94330
  Beta virt. eigenvalues --    5.98861   7.05395  23.58360  23.78605  23.81209
  Beta virt. eigenvalues --   23.94270  24.04309  24.14768  24.21475  49.95411
  Beta virt. eigenvalues --   49.96312  50.02987  50.05944  50.10208
          Condensed to atoms (all electrons):
               1          2          3          4          5          6
     1  C   17.062300  -6.616032  -2.016839   5.133891  -6.282996  -1.247854
     2  C   -6.616032  27.051919  -0.658845  -8.793725   2.921124  -6.538897
     3  C   -2.016839  -0.658845  13.712432  -5.092028   0.488045   1.055664
     4  C    5.133891  -8.793725  -5.092028  24.515442  -4.988650  -4.509134
     5  C   -6.282996   2.921124   0.488045  -4.988650  14.908567  -0.889026
     6  C   -1.247854  -6.538897   1.055664  -4.509134  -0.889026  17.446593
     7  H   -0.172204   0.575814   0.031784   0.005483   0.049246  -0.063776
     8  H    0.100769  -0.091359  -0.287819   1.010597  -0.144950  -0.229978
     9  C    0.281272  -1.714254  -2.068289  -0.247669  -0.404669   0.555349
    10  O    0.049360   0.012271  -0.210868  -0.021679  -0.064840   0.014978
    11  H   -0.041745   0.087358   0.088252  -0.209256   0.117616   0.027678
    12  O    0.063227   0.021593  -0.222492  -0.044415   0.021661   0.021372
    13  O   -0.092520   0.013352   0.019449  -0.299383   0.530777  -0.067490
    14  H   -0.026705   0.042774  -0.027900   0.026769   0.196996  -0.226705
    15  O   -0.304227  -0.081689   0.006678   0.004087  -0.050214   0.471867
    16  H   -0.074085  -0.155152   0.001599   0.071985   0.052040   0.109668
    17  O    0.423932   0.336224   0.004322  -0.010767  -0.047168  -0.651638
    18  H    0.093210  -0.187762  -0.063362  -0.015617   0.026826   0.144010
    19  Cr  -0.016196   0.026167   0.011290  -0.048559   0.038632  -0.012301
               7          8          9         10         11         12
     1  C   -0.172204   0.100769   0.281272   0.049360  -0.041745   0.063227
     2  C    0.575814  -0.091359  -1.714254   0.012271   0.087358   0.021593
     3  C    0.031784  -0.287819  -2.068289  -0.210868   0.088252  -0.222492
     4  C    0.005483   1.010597  -0.247669  -0.021679  -0.209256  -0.044415
     5  C    0.049246  -0.144950  -0.404669  -0.064840   0.117616   0.021661
     6  C   -0.063776  -0.229978   0.555349   0.014978   0.027678   0.021372
     7  H    0.379857   0.002153  -0.087072  -0.000330   0.000517   0.002520
     8  H    0.002153   0.444810  -0.042341  -0.007142  -0.019629  -0.003717
     9  C   -0.087072  -0.042341   8.919899   0.349197  -0.045826   0.485771
    10  O   -0.000330  -0.007142   0.349197   7.903933   0.270142  -0.110060
    11  H    0.000517  -0.019629  -0.045826   0.270142   0.339935   0.015577
    12  O    0.002520  -0.003717   0.485771  -0.110060   0.015577   8.156641
    13  O    0.000369  -0.041800   0.012926   0.000315   0.001498   0.000098
    14  H    0.000796   0.006884  -0.002299  -0.000297   0.000044   0.000045
    15  O   -0.000653  -0.000413  -0.002919  -0.000006  -0.000075  -0.000033
    16  H   -0.001497   0.000447   0.000011   0.000123  -0.000074  -0.000017
    17  O   -0.018516  -0.000153   0.003812   0.000108   0.000175   0.000049
    18  H   -0.006601   0.000372   0.001484  -0.000162  -0.000001  -0.000226
    19  Cr   0.000066  -0.000385  -0.000483   0.000017   0.000046   0.000017
              13         14         15         16         17         18
     1  C   -0.092520  -0.026705  -0.304227  -0.074085   0.423932   0.093210
     2  C    0.013352   0.042774  -0.081689  -0.155152   0.336224  -0.187762
     3  C    0.019449  -0.027900   0.006678   0.001599   0.004322  -0.063362
     4  C   -0.299383   0.026769   0.004087   0.071985  -0.010767  -0.015617
     5  C    0.530777   0.196996  -0.050214   0.052040  -0.047168   0.026826
     6  C   -0.067490  -0.226705   0.471867   0.109668  -0.651638   0.144010
     7  H    0.000369   0.000796  -0.000653  -0.001497  -0.018516  -0.006601
     8  H   -0.041800   0.006884  -0.000413   0.000447  -0.000153   0.000372
     9  C    0.012926  -0.002299  -0.002919   0.000011   0.003812   0.001484
    10  O    0.000315  -0.000297  -0.000006   0.000123   0.000108  -0.000162
    11  H    0.001498   0.000044  -0.000075  -0.000074   0.000175  -0.000001
    12  O    0.000098   0.000045  -0.000033  -0.000017   0.000049  -0.000226
    13  O    7.791901   0.274436   0.007418  -0.002333   0.000438  -0.000086
    14  H    0.274436   0.331519  -0.010361   0.000210  -0.000696   0.000269
    15  O    0.007418  -0.010361   8.038946   0.271837   0.013507  -0.001396
    16  H   -0.002333   0.000210   0.271837   0.347854  -0.001972   0.001664
    17  O    0.000438  -0.000696   0.013507  -0.001972   7.901336   0.282816
    18  H   -0.000086   0.000269  -0.001396   0.001664   0.282816   0.325249
    19  Cr   0.002198  -0.005168   0.045845  -0.009157   0.002189  -0.000366
              19
     1  C   -0.016196
     2  C    0.026167
     3  C    0.011290
     4  C   -0.048559
     5  C    0.038632
     6  C   -0.012301
     7  H    0.000066
     8  H   -0.000385
     9  C   -0.000483
    10  O    0.000017
    11  H    0.000046
    12  O    0.000017
    13  O    0.002198
    14  H   -0.005168
    15  O    0.045845
    16  H   -0.009157
    17  O    0.002189
    18  H   -0.000366
    19  Cr  12.045914
          Atomic-Atomic Spin Densities.
               1          2          3          4          5          6
     1  C    0.586917   0.073035  -0.054635   0.313851  -0.498959  -0.474865
     2  C    0.073035   0.719872  -0.035822   0.005177   0.141888  -0.327499
     3  C   -0.054635  -0.035822   0.124643  -0.152572   0.012272   0.026170
     4  C    0.313851   0.005177  -0.152572   0.907033  -0.516088  -0.304912
     5  C   -0.498959   0.141888   0.012272  -0.516088   0.943128   0.249636
     6  C   -0.474865  -0.327499   0.026170  -0.304912   0.249636   0.838338
     7  H   -0.000651  -0.024134   0.011578   0.004260  -0.000402   0.002697
     8  H   -0.004835   0.014996   0.025362  -0.032389   0.001193  -0.002570
     9  C    0.054363  -0.083139  -0.055068   0.118768  -0.097939  -0.014838
    10  O    0.000569  -0.003111   0.004166  -0.002546  -0.001925   0.000973
    11  H    0.000520  -0.002152  -0.006806   0.008167  -0.001297  -0.001524
    12  O   -0.001316   0.002108   0.001085  -0.004113  -0.000724  -0.000595
    13  O   -0.013887  -0.005575  -0.011088   0.001369  -0.003387  -0.051960
    14  H    0.024070   0.004902  -0.004267   0.021564  -0.057602   0.009631
    15  O    0.051430   0.039580  -0.001067  -0.006701  -0.050536  -0.007798
    16  H    0.009267   0.002926   0.000404   0.000165  -0.011507  -0.004459
    17  O   -0.042037   0.004882  -0.008353  -0.003504   0.020165   0.001160
    18  H   -0.000444  -0.013287  -0.002508   0.001357   0.004827   0.009671
    19  Cr  -0.041962  -0.009036   0.002360  -0.011282   0.052224  -0.001152
               7          8          9         10         11         12
     1  C   -0.000651  -0.004835   0.054363   0.000569   0.000520  -0.001316
     2  C   -0.024134   0.014996  -0.083139  -0.003111  -0.002152   0.002108
     3  C    0.011578   0.025362  -0.055068   0.004166  -0.006806   0.001085
     4  C    0.004260  -0.032389   0.118768  -0.002546   0.008167  -0.004113
     5  C   -0.000402   0.001193  -0.097939  -0.001925  -0.001297  -0.000724
     6  C    0.002697  -0.002570  -0.014838   0.000973  -0.001524  -0.000595
     7  H   -0.013478  -0.000060   0.003882   0.000035   0.000019   0.000589
     8  H   -0.000060  -0.013320   0.000145  -0.000065   0.000980  -0.000286
     9  C    0.003882   0.000145   0.091410  -0.000330   0.002128   0.003477
    10  O    0.000035  -0.000065  -0.000330  -0.000887  -0.000057   0.000029
    11  H    0.000019   0.000980   0.002128  -0.000057  -0.000257   0.000196
    12  O    0.000589  -0.000286   0.003477   0.000029   0.000196  -0.011195
    13  O    0.000066   0.002354   0.000103   0.000029  -0.000165  -0.000003
    14  H    0.000092  -0.000894   0.000603  -0.000019   0.000050   0.000010
    15  O   -0.000035  -0.000508   0.000380   0.000002   0.000048  -0.000003
    16  H    0.000024  -0.000077   0.000372   0.000005   0.000011  -0.000003
    17  O    0.000014   0.000095  -0.001347   0.000001   0.000003   0.000051
    18  H   -0.000116   0.000054  -0.000582  -0.000013  -0.000003  -0.000014
    19  Cr  -0.000066   0.000036  -0.000309   0.000003  -0.000013  -0.000002
              13         14         15         16         17         18
     1  C   -0.013887   0.024070   0.051430   0.009267  -0.042037  -0.000444
     2  C   -0.005575   0.004902   0.039580   0.002926   0.004882  -0.013287
     3  C   -0.011088  -0.004267  -0.001067   0.000404  -0.008353  -0.002508
     4  C    0.001369   0.021564  -0.006701   0.000165  -0.003504   0.001357
     5  C   -0.003387  -0.057602  -0.050536  -0.011507   0.020165   0.004827
     6  C   -0.051960   0.009631  -0.007798  -0.004459   0.001160   0.009671
     7  H    0.000066   0.000092  -0.000035   0.000024   0.000014  -0.000116
     8  H    0.002354  -0.000894  -0.000508  -0.000077   0.000095   0.000054
     9  C    0.000103   0.000603   0.000380   0.000372  -0.001347  -0.000582
    10  O    0.000029  -0.000019   0.000002   0.000005   0.000001  -0.000013
    11  H   -0.000165   0.000050   0.000048   0.000011   0.000003  -0.000003
    12  O   -0.000003   0.000010  -0.000003  -0.000003   0.000051  -0.000014
    13  O    0.197474   0.008469   0.012485   0.000159  -0.000310  -0.000016
    14  H    0.008469  -0.014252  -0.003015   0.000088  -0.000105   0.000033
    15  O    0.012485  -0.003015  -0.050767   0.004711  -0.001701   0.000511
    16  H    0.000159   0.000088   0.004711  -0.000583   0.000016   0.000122
    17  O   -0.000310  -0.000105  -0.001701   0.000016   0.084406   0.000000
    18  H   -0.000016   0.000033   0.000511   0.000122   0.000000  -0.001753
    19  Cr   0.002943  -0.008683   0.012702  -0.002348  -0.000252  -0.000073
              19
     1  C   -0.041962
     2  C   -0.009036
     3  C    0.002360
     4  C   -0.011282
     5  C    0.052224
     6  C   -0.001152
     7  H   -0.000066
     8  H    0.000036
     9  C   -0.000309
    10  O    0.000003
    11  H   -0.000013
    12  O   -0.000002
    13  O    0.002943
    14  H   -0.008683
    15  O    0.012702
    16  H   -0.002348
    17  O   -0.000252
    18  H   -0.000073
    19  Cr   2.012046
 Mulliken charges and spin densities:
               1          2
     1  C   -0.316561  -0.019568
     2  C   -0.250880   0.505610
     3  C    1.228925  -0.124146
     4  C   -0.487371   0.347605
     5  C   -0.479016   0.184970
     6  C    0.589621  -0.053898
     7  H    0.302045  -0.015688
     8  H    0.303652  -0.009788
     9  C    0.006098   0.022080
    10  O   -0.185060  -0.003144
    11  H    0.367769  -0.000154
    12  O   -0.407611  -0.010709
    13  O   -0.151563   0.139061
    14  H    0.419389  -0.019324
    15  O   -0.408202  -0.000283
    16  H    0.386849  -0.000707
    17  O   -0.237997   0.053183
    18  H    0.399677  -0.002237
    19  Cr   1.920235   2.007135
 Sum of Mulliken charges =   3.00000   3.00000
 Mulliken charges and spin densities with hydrogens summed into heavy atoms:
               1          2
     1  C   -0.316561  -0.019568
     2  C    0.051165   0.489923
     3  C    1.228925  -0.124146
     4  C   -0.183719   0.337817
     5  C   -0.479016   0.184970
     6  C    0.589621  -0.053898
     9  C    0.006098   0.022080
    10  O    0.182708  -0.003298
    12  O   -0.407611  -0.010709
    13  O    0.267826   0.119737
    15  O   -0.021352  -0.000990
    17  O    0.161680   0.050946
    19  Cr   1.920235   2.007135
 Electronic spatial extent (au):  <R**2>=           3343.6237
 Charge=              3.0000 electrons
 Dipole moment (field-independent basis, Debye):
    X=             39.7823    Y=             -3.2118    Z=              0.7079  Tot=             39.9181
 Quadrupole moment (field-independent basis, Debye-Ang):
   XX=             66.7499   YY=            -39.5388   ZZ=            -73.2861
   XY=             -4.2780   XZ=              0.1904   YZ=              1.6678
 Traceless Quadrupole moment (field-independent basis, Debye-Ang):
   XX=             82.1082   YY=            -24.1804   ZZ=            -57.9278
   XY=             -4.2780   XZ=              0.1904   YZ=              1.6678
 Octapole moment (field-independent basis, Debye-Ang**2):
  XXX=            965.2582  YYY=             30.6659  ZZZ=             -0.7157  XYY=             18.8857
  XXY=           -112.1615  XXZ=             -0.5733  XZZ=             47.5444  YZZ=             -2.8914
  YYZ=              2.1594  XYZ=              4.3086
 Hexadecapole moment (field-independent basis, Debye-Ang**3):
 XXXX=          -1389.6690 YYYY=           -476.3266 ZZZZ=            -67.4439 XXXY=            -83.7711
 XXXZ=            -35.8757 YYYX=            -10.8808 YYYZ=              3.1309 ZZZX=             -4.2828
 ZZZY=              1.8382 XXYY=           -512.4942 XXZZ=           -516.6064 YYZZ=           -142.2273
 XXYZ=             11.5585 YYXZ=              4.4701 ZZXY=             -9.7691
 N-N= 8.257138498635D+02 E-N=-3.310839256693D+03  KE= 6.876697257285D+02
                          Isotropic Fermi Contact Couplings
        Atom                 a.u.       MegaHertz       Gauss      10(-4) cm-1
     1  C(13)             -0.01242      -4.65485      -1.66097      -1.55269
     2  C(13)              0.07542      28.26143      10.08438       9.42700
     3  C(13)             -0.03884     -14.55592      -5.19391      -4.85533
     4  C(13)              0.03936      14.74812       5.26250       4.91944
     5  C(13)              0.00996       3.73091       1.33128       1.24450
     6  C(13)             -0.01828      -6.84837      -2.44367      -2.28437
     7  H(1)              -0.00881     -13.12284      -4.68256      -4.37731
     8  H(1)              -0.00574      -8.54628      -3.04952      -2.85073
     9  C(13)              0.00366       1.36985       0.48880       0.45693
    10  O(17)             -0.00018       0.03723       0.01329       0.01242
    11  H(1)               0.00006       0.08875       0.03167       0.02960
    12  O(17)             -0.00246       0.49686       0.17729       0.16573
    13  O(17)              0.03093      -6.24922      -2.22988      -2.08451
    14  H(1)              -0.00328      -4.88076      -1.74158      -1.62805
    15  O(17)             -0.02865       5.78858       2.06551       1.93086
    16  H(1)               0.00048       0.70777       0.25255       0.23609
    17  O(17)              0.01568      -3.16831      -1.13053      -1.05684
    18  H(1)              -0.00109      -1.61770      -0.57724      -0.53961
    19  Cr(53)            -0.00001       0.00043       0.00015       0.00014
 --------------------------------------------------------
       Center         ----  Spin Dipole Couplings  ----
                      3XX-RR        3YY-RR        3ZZ-RR
 --------------------------------------------------------
     1   Atom       -0.011460     -0.027429      0.038889
     2   Atom       -0.286541     -0.288367      0.574908
     3   Atom        0.055642      0.063671     -0.119313
     4   Atom       -0.174887     -0.176884      0.351770
     5   Atom       -0.088723     -0.108025      0.196747
     6   Atom        0.027151      0.012208     -0.039359
     7   Atom       -0.002541      0.010217     -0.007676
     8   Atom       -0.009503      0.016969     -0.007466
     9   Atom        0.003696     -0.003616     -0.000081
    10   Atom        0.006190      0.001035     -0.007225
    11   Atom        0.004786     -0.001691     -0.003096
    12   Atom        0.025018      0.015694     -0.040713
    13   Atom       -0.284729     -0.334002      0.618730
    14   Atom        0.052052     -0.023022     -0.029031
    15   Atom        0.019735      0.004596     -0.024331
    16   Atom        0.011116      0.004981     -0.016097
    17   Atom       -0.141915     -0.145755      0.287670
    18   Atom       -0.001203      0.010337     -0.009133
    19   Atom        1.284954      0.993037     -2.277991
 --------------------------------------------------------
                        XY            XZ            YZ
 --------------------------------------------------------
     1   Atom        0.005068      0.000666     -0.000749
     2   Atom       -0.005710     -0.011869      0.008442
     3   Atom       -0.000033      0.002142     -0.001865
     4   Atom        0.006230     -0.007855      0.004361
     5   Atom       -0.005664     -0.002223      0.007415
     6   Atom       -0.000906      0.000560     -0.000288
     7   Atom       -0.041709      0.000425     -0.000736
     8   Atom        0.024144     -0.000341      0.000105
     9   Atom        0.002597      0.000006      0.000064
    10   Atom        0.002717      0.000124     -0.000023
    11   Atom        0.004110      0.000035      0.000033
    12   Atom       -0.001361      0.001025     -0.000384
    13   Atom        0.024981     -0.016001      0.007352
    14   Atom        0.030156     -0.002042     -0.001479
    15   Atom       -0.020486      0.000675     -0.003037
    16   Atom       -0.019546     -0.005157      0.006595
    17   Atom       -0.003868     -0.007467      0.002568
    18   Atom       -0.007178      0.000053     -0.000219
    19   Atom        4.261882      0.505055      0.466916
 --------------------------------------------------------


 ---------------------------------------------------------------------------------
              Anisotropic Spin Dipole Couplings in Principal Axis System
 ---------------------------------------------------------------------------------

       Atom             a.u.   MegaHertz   Gauss  10(-4) cm-1        Axes

              Baa    -0.0289    -3.880    -1.384    -1.294 -0.2793  0.9601  0.0133
     1 C(13)  Bbb    -0.0100    -1.341    -0.478    -0.447  0.9601  0.2794 -0.0088
              Bcc     0.0389     5.221     1.863     1.741  0.0122 -0.0104  0.9999
 
              Baa    -0.2932   -39.350   -14.041   -13.126  0.6503  0.7597  0.0015
     2 C(13)  Bbb    -0.2819   -37.831   -13.499   -12.619  0.7595 -0.6503  0.0169
              Bcc     0.5752    77.180    27.540    25.745 -0.0138  0.0099  0.9999
 
              Baa    -0.1194   -16.017    -5.715    -5.343 -0.0122  0.0102  0.9999
     3 C(13)  Bbb     0.0557     7.470     2.665     2.492  0.9999  0.0070  0.0122
              Bcc     0.0637     8.547     3.050     2.851 -0.0069  0.9999 -0.0103
 
              Baa    -0.1823   -24.467    -8.730    -8.161 -0.6516  0.7584 -0.0158
     4 C(13)  Bbb    -0.1696   -22.758    -8.121    -7.591  0.7584  0.6518  0.0060
              Bcc     0.3519    47.225    16.851    15.752 -0.0148  0.0081  0.9999
 
              Baa    -0.1097   -14.721    -5.253    -4.911  0.2584  0.9658 -0.0215
     5 C(13)  Bbb    -0.0872   -11.707    -4.177    -3.905  0.9660 -0.2582  0.0143
              Bcc     0.1969    26.428     9.430     8.816 -0.0083  0.0245  0.9997
 
              Baa    -0.0394    -5.282    -1.885    -1.762 -0.0083  0.0054  1.0000
     6 C(13)  Bbb     0.0122     1.631     0.582     0.544  0.0605  0.9982 -0.0049
              Bcc     0.0272     3.651     1.303     1.218  0.9981 -0.0605  0.0087
 
              Baa    -0.0384   -20.465    -7.302    -6.826  0.7586  0.6515  0.0051
     7 H(1)   Bbb    -0.0077    -4.102    -1.464    -1.368 -0.0140  0.0084  0.9999
              Bcc     0.0460    24.567     8.766     8.195 -0.6514  0.7586 -0.0155
 
              Baa    -0.0238   -12.703    -4.533    -4.237  0.8603 -0.5094  0.0212
     8 H(1)   Bbb    -0.0075    -3.980    -1.420    -1.328 -0.0171  0.0127  0.9998
              Bcc     0.0313    16.683     5.953     5.565  0.5096  0.8604 -0.0022
 
              Baa    -0.0044    -0.596    -0.213    -0.199 -0.3039  0.9526 -0.0137
     9 C(13)  Bbb    -0.0001    -0.011    -0.004    -0.004 -0.0093  0.0114  0.9999
              Bcc     0.0045     0.607     0.217     0.203  0.9527  0.3040  0.0054
 
              Baa    -0.0072     0.523     0.187     0.174 -0.0105  0.0063  0.9999
    10 O(17)  Bbb    -0.0001     0.010     0.003     0.003 -0.3947  0.9188 -0.0099
              Bcc     0.0074    -0.532    -0.190    -0.178  0.9188  0.3948  0.0072
 
              Baa    -0.0037    -1.966    -0.702    -0.656 -0.4363  0.8995 -0.0239
    11 H(1)   Bbb    -0.0031    -1.652    -0.589    -0.551 -0.0146  0.0195  0.9997
              Bcc     0.0068     3.618     1.291     1.207  0.8997  0.4365  0.0046
 
              Baa    -0.0407     2.947     1.052     0.983 -0.0155  0.0064  0.9999
    12 O(17)  Bbb     0.0155    -1.122    -0.400    -0.374  0.1420  0.9899 -0.0042
              Bcc     0.0252    -1.826    -0.651    -0.609  0.9898 -0.1419  0.0162
 
              Baa    -0.3446    24.937     8.898     8.318 -0.3880  0.9216 -0.0135
    13 O(17)  Bbb    -0.2744    19.858     7.086     6.624  0.9215  0.3881  0.0133
              Bcc     0.6191   -44.795   -15.984   -14.942 -0.0175  0.0073  0.9998
 
              Baa    -0.0337   -18.005    -6.424    -6.006 -0.3245  0.9335  0.1523
    14 H(1)   Bbb    -0.0290   -15.465    -5.518    -5.158  0.0752 -0.1351  0.9880
              Bcc     0.0627    33.469    11.943    11.164  0.9429  0.3320 -0.0263
 
              Baa    -0.0247     1.788     0.638     0.597  0.0475  0.1358  0.9896
    15 O(17)  Bbb    -0.0094     0.679     0.242     0.226  0.5721  0.8084 -0.1384
              Bcc     0.0341    -2.467    -0.880    -0.823  0.8188 -0.5727  0.0392
 
              Baa    -0.0180    -9.607    -3.428    -3.204 -0.0343 -0.3025  0.9525
    16 H(1)   Bbb    -0.0113    -6.036    -2.154    -2.013  0.6683  0.7017  0.2469
              Bcc     0.0293    15.643     5.582     5.218  0.7431 -0.6451 -0.1781
 
              Baa    -0.1482    10.721     3.825     3.576  0.5300  0.8480  0.0041
    17 O(17)  Bbb    -0.1397    10.105     3.606     3.371  0.8478 -0.5300  0.0180
              Bcc     0.2878   -20.826    -7.431    -6.947 -0.0174  0.0061  0.9998
 
              Baa    -0.0091    -4.874    -1.739    -1.626  0.0052  0.0132  0.9999
    18 H(1)   Bbb    -0.0046    -2.477    -0.884    -0.826  0.9018  0.4320 -0.0104
              Bcc     0.0138     7.351     2.623     2.452 -0.4321  0.9018 -0.0096
 
              Baa    -3.1257    94.455    33.704    31.507 -0.6959  0.7179  0.0192
    19 Cr(53) Bbb    -2.3388    70.676    25.219    23.575 -0.0502 -0.0753  0.9959
              Bcc     5.4644  -165.131   -58.923   -55.082  0.7164  0.6921  0.0885
 

 ---------------------------------------------------------------------------------

 No NMR shielding tensors so no spin-rotation constants.
 Leave Link  601 at Wed May 31 23:02:10 2023, MaxMem=  2684354560 cpu:               2.3 elap:               0.3
 (Enter /home/xut/apps/g16/l701.exe)
 ... and contract with generalized density number  0.
 Compute integral first derivatives.
   1 Symmetry operations used in ECPInt.
 ECPInt:  NShTT=    6105 NPrTT=   23469 LenC2=    5788 LenP2D=   15708.
 LDataN:  DoStor=T MaxTD1= 5 Len=  102
 D1PCM: PCM CHGder 1st derivatives, ID1Alg=3 FixD1E=F DoIter=F DoCFld=F I1PDM=0.
 GePol: Maximum number of non-zero 1st derivatives   =     191
 Leave Link  701 at Wed May 31 23:02:11 2023, MaxMem=  2684354560 cpu:              12.5 elap:               1.3
 (Enter /home/xut/apps/g16/l702.exe)
 L702 exits ... SP integral derivatives will be done elsewhere.
 Leave Link  702 at Wed May 31 23:02:11 2023, MaxMem=  2684354560 cpu:               0.2 elap:               0.0
 (Enter /home/xut/apps/g16/l703.exe)
 Integral derivatives from FoFJK, PRISM(SPDF).
 Compute integral first derivatives, UseDBF=F ICtDFT=           0.
 Calling FoFJK, ICntrl=      2127 FMM=F ISym2X=0 I1Cent= 0 IOpClX= 1 NMat=1 NMatS=1 NMatT=0.
 FoFJK:  IHMeth= 1 ICntrl=    2127 DoSepK=F KAlg= 0 I1Cent=           0 FoldK=F
 IRaf=         0 NMat=       1 IRICut=       1 DoRegI=T DoRafI=F ISym2E= 0 IDoP0=0 IntGTp=1.
 FoFCou: FMM=F IPFlag=           0 FMFlag=      100000 FMFlg1=         800
         NFxFlg=           0 DoJE=F BraDBF=F KetDBF=F FulRan=T
         wScrn=  0.000000 ICntrl=      2127 IOpCl=  1 I1Cent=           0 NGrid=           0
         NMat0=    1 NMatS0=      1 NMatT0=    0 NMatD0=    1 NMtDS0=    0 NMtDT0=    0
 Symmetry not used in FoFCou.
 Leave Link  703 at Wed May 31 23:02:22 2023, MaxMem=  2684354560 cpu:             113.7 elap:              11.4
 (Enter /home/xut/apps/g16/l716.exe)
 Dipole        = 1.56515743D+01-1.26363282D+00 2.78519535D-01
 ***** Axes restored to original set *****
 -------------------------------------------------------------------
 Center     Atomic                   Forces (Hartrees/Bohr)
 Number     Number              X              Y              Z
 -------------------------------------------------------------------
      1        6          -0.018460952    0.019344156   -0.001425166
      2        6          -0.017921737   -0.017334854    0.000211275
      3        6          -0.022354671    0.001559647   -0.000054546
      4        6           0.053367182    0.000826732   -0.000184987
      5        6          -0.017247611    0.000695477   -0.000110044
      6        6           0.050807162   -0.004459620    0.001920850
      7        1          -0.004691493    0.009872658   -0.000246128
      8        1           0.008738139   -0.011242208    0.000389306
      9        6          -0.012770007    0.067293509   -0.000613458
     10        8          -0.017769960   -0.000915575   -0.000220284
     11        1           0.008316283   -0.002574795   -0.000062104
     12        8           0.041275327   -0.054002585    0.001005669
     13        8          -0.035330481   -0.018207653   -0.000382448
     14        1           0.005463553    0.009596195    0.001792151
     15        8          -0.051465365   -0.020898088   -0.004522540
     16        1          -0.001066095    0.011869606    0.004537037
     17        8           0.033805921    0.006754480    0.000620633
     18        1          -0.014516442    0.000063461    0.000088412
     19       24           0.011821247    0.001759458   -0.002743629
 -------------------------------------------------------------------
 Cartesian Forces:  Max     0.067293509 RMS     0.020580952
 Leave Link  716 at Wed May 31 23:02:22 2023, MaxMem=  2684354560 cpu:               0.2 elap:               0.0
 (Enter /home/xut/apps/g16/l103.exe)

 GradGradGradGradGradGradGradGradGradGradGradGradGradGradGradGradGradGrad
 Berny optimization.
 FormGI is forming the generalized inverse of G from B-inverse, IUseBI=4.
 Internal  Forces:  Max     0.067815680 RMS     0.013597399
 Search for a local minimum.
 Step number   1 out of a maximum of   94
 All quantities printed in internal units (Hartrees-Bohrs-Radians)
 RMS Force = .13597D-01 SwitMx=.10000D-02 MixMth= 1
 Mixed Optimization -- RFO/linear search
 Second derivative matrix not updated -- first step.
 ITU=  0
     Eigenvalues ---    0.00237   0.01087   0.01157   0.01295   0.01577
     Eigenvalues ---    0.01601   0.01681   0.01752   0.01972   0.02011
     Eigenvalues ---    0.02272   0.02399   0.02419   0.02997   0.02997
     Eigenvalues ---    0.02997   0.08213   0.16000   0.16000   0.16000
     Eigenvalues ---    0.16000   0.16000   0.16000   0.22288   0.23451
     Eigenvalues ---    0.23521   0.25000   0.25000   0.25000   0.25000
     Eigenvalues ---    0.25000   0.25000   0.25000   0.28519   0.28997
     Eigenvalues ---    0.37230   0.37230   0.40989   0.41817   0.43198
     Eigenvalues ---    0.45556   0.50707   0.54158   0.55473   0.55473
     Eigenvalues ---    0.55473   0.55474   0.66833   0.66833   0.66833
     Eigenvalues ---    0.80208
 RFO step:  Lambda=-4.00409839D-02 EMin= 2.36828247D-03
 Linear search not attempted -- first point.
 Maximum step size (   0.300) exceeded in Quadratic search.
    -- Step size scaled by   0.860
 Iteration  1 RMS(Cart)=  0.08440509 RMS(Int)=  0.00298367
 Iteration  2 RMS(Cart)=  0.00380613 RMS(Int)=  0.00023376
 Iteration  3 RMS(Cart)=  0.00000792 RMS(Int)=  0.00023373
 Iteration  4 RMS(Cart)=  0.00000000 RMS(Int)=  0.00023373
 ITry= 1 IFail=0 DXMaxC= 3.94D-01 DCOld= 1.00D+10 DXMaxT= 3.00D-01 DXLimC= 3.00D+00 Rises=F
 Variable       Old X    -DE/DX   Delta X   Delta X   Delta X     New X
                                 (Linear)    (Quad)   (Total)
    R1        2.66646   0.01124   0.00000   0.02146   0.02151   2.68797
    R2        2.57019   0.02044   0.00000   0.03176   0.03175   2.60194
    R3        2.45910   0.01338   0.00000   0.01623   0.01623   2.47533
    R4        2.65794  -0.00499   0.00000  -0.00858  -0.00852   2.64942
    R5        2.02201   0.01069   0.00000   0.02229   0.02229   2.04429
    R6        2.55246   0.01896   0.00000   0.02684   0.02685   2.57931
    R7        2.91018  -0.01997   0.00000  -0.05278  -0.05278   2.85740
    R8        2.89198  -0.04606   0.00000  -0.12038  -0.12042   2.77156
    R9        2.02201   0.00704   0.00000   0.01467   0.01467   2.03667
   R10        2.63930   0.00653   0.00000   0.01100   0.01094   2.65024
   R11        2.45910  -0.01194   0.00000  -0.01449  -0.01449   2.44461
   R12        2.70231  -0.04140   0.00000  -0.07910  -0.07910   2.62321
   R13        2.45910   0.00665   0.00000   0.00807   0.00807   2.46717
   R14        2.37803  -0.06782   0.00000  -0.06922  -0.06922   2.30882
   R15        1.81414   0.00682   0.00000   0.00985   0.00985   1.82399
   R16        1.81414   0.00675   0.00000   0.00976   0.00976   1.82390
   R17        1.81414   0.01208   0.00000   0.01746   0.01746   1.83159
   R18        4.23633   0.01025   0.00000   0.07209   0.07209   4.30842
   R19        1.81414   0.00901   0.00000   0.01302   0.01302   1.82715
    A1        2.11711  -0.00672   0.00000  -0.01612  -0.01610   2.10101
    A2        2.08304   0.01282   0.00000   0.03610   0.03608   2.11912
    A3        2.08304  -0.00610   0.00000  -0.01997  -0.01999   2.06305
    A4        2.11749  -0.00489   0.00000  -0.01349  -0.01340   2.10409
    A5        2.08285  -0.00003   0.00000  -0.00389  -0.00394   2.07890
    A6        2.08285   0.00492   0.00000   0.01737   0.01732   2.10016
    A7        2.09456   0.00107   0.00000   0.00167   0.00172   2.09628
    A8        2.09431  -0.01837   0.00000  -0.05370  -0.05373   2.04058
    A9        2.09431   0.01731   0.00000   0.05204   0.05201   2.14632
   A10        2.07156   0.00642   0.00000   0.01678   0.01672   2.08828
   A11        2.10581   0.00915   0.00000   0.04473   0.04475   2.15057
   A12        2.10581  -0.01557   0.00000  -0.06151  -0.06149   2.04433
   A13        2.07113   0.00546   0.00000   0.01371   0.01359   2.08471
   A14        2.10603  -0.03071   0.00000  -0.08976  -0.08970   2.01633
   A15        2.10603   0.02524   0.00000   0.07605   0.07611   2.18214
   A16        2.09453  -0.00134   0.00000  -0.00254  -0.00265   2.09188
   A17        2.09433  -0.01378   0.00000  -0.04154  -0.04152   2.05281
   A18        2.09433   0.01512   0.00000   0.04408   0.04409   2.13841
   A19        2.09440   0.00708   0.00000   0.02098   0.02098   2.11537
   A20        2.09439  -0.00450   0.00000  -0.01333  -0.01334   2.08106
   A21        2.09439  -0.00258   0.00000  -0.00765  -0.00766   2.08674
   A22        2.09439  -0.00926   0.00000  -0.03979  -0.03979   2.05461
   A23        2.09440  -0.01539   0.00000  -0.06613  -0.06613   2.02827
   A24        1.91063  -0.01155   0.00000  -0.03527  -0.03636   1.87427
   A25        2.54907   0.02002   0.00000   0.06867   0.06762   2.61669
   A26        1.77636  -0.00587   0.00000  -0.01049  -0.01160   1.76477
   A27        2.09439  -0.02018   0.00000  -0.08670  -0.08670   2.00769
    D1        0.00001  -0.00028   0.00000  -0.00508  -0.00489  -0.00488
    D2       -3.14159   0.00027   0.00000   0.00328   0.00326  -3.13833
    D3       -3.14159  -0.00039   0.00000  -0.00633  -0.00606   3.13553
    D4        0.00000   0.00016   0.00000   0.00203   0.00208   0.00208
    D5       -0.00000  -0.00064   0.00000  -0.00806  -0.00795  -0.00795
    D6        3.14159  -0.00166   0.00000  -0.02207  -0.02161   3.11998
    D7        3.14159  -0.00053   0.00000  -0.00682  -0.00681   3.13478
    D8       -0.00000  -0.00155   0.00000  -0.02082  -0.02047  -0.02048
    D9       -0.00000   0.00034   0.00000   0.00408   0.00404   0.00404
   D10        3.14159   0.00023   0.00000   0.00285   0.00289  -3.13871
   D11       -0.00000   0.00067   0.00000   0.00932   0.00926   0.00926
   D12        3.14159   0.00069   0.00000   0.01030   0.01017  -3.13142
   D13        3.14159   0.00012   0.00000   0.00096   0.00102  -3.14058
   D14        0.00000   0.00014   0.00000   0.00194   0.00192   0.00193
   D15        0.00000  -0.00017   0.00000  -0.00090  -0.00098  -0.00098
   D16       -3.14159  -0.00052   0.00000  -0.00589  -0.00600   3.13560
   D17        3.14159  -0.00019   0.00000  -0.00188  -0.00195   3.13965
   D18        0.00000  -0.00054   0.00000  -0.00686  -0.00697  -0.00697
   D19        3.14159  -0.00053   0.00000  -0.01033  -0.01031   3.13129
   D20        0.00000  -0.00013   0.00000  -0.00360  -0.00358  -0.00358
   D21        0.00000  -0.00051   0.00000  -0.00935  -0.00937  -0.00937
   D22       -3.14159  -0.00011   0.00000  -0.00262  -0.00265   3.13895
   D23        0.00000  -0.00071   0.00000  -0.01168  -0.01168  -0.01167
   D24        3.14159  -0.00089   0.00000  -0.01480  -0.01450   3.12709
   D25        3.14159  -0.00036   0.00000  -0.00670  -0.00695   3.13464
   D26       -0.00000  -0.00054   0.00000  -0.00981  -0.00978  -0.00979
   D27        0.00000   0.00111   0.00000   0.01602   0.01603   0.01603
   D28       -3.14159   0.00213   0.00000   0.03003   0.03039  -3.11120
   D29       -3.14159   0.00129   0.00000   0.01914   0.01914  -3.12245
   D30        0.00000   0.00231   0.00000   0.03314   0.03350   0.03351
   D31        3.14159   0.00154   0.00000   0.01935   0.01927  -3.12233
   D32       -0.00000   0.00136   0.00000   0.01618   0.01626   0.01625
   D33        0.52360  -0.00157   0.00000  -0.02067  -0.02073   0.50286
   D34       -3.03855   0.00434   0.00000   0.06294   0.06305  -2.97550
   D35       -2.61799  -0.00259   0.00000  -0.03467  -0.03479  -2.65278
   D36        0.10304   0.00331   0.00000   0.04894   0.04900   0.15204
   D37       -0.00000  -0.00005   0.00000   0.00021   0.00022   0.00022
   D38        3.14159  -0.00046   0.00000  -0.00652  -0.00652   3.13506
         Item               Value     Threshold  Converged?
 Maximum Force            0.067816     0.000450     NO 
 RMS     Force            0.013597     0.000300     NO 
 Maximum Displacement     0.394359     0.001800     NO 
 RMS     Displacement     0.086033     0.001200     NO 
 Predicted change in Energy=-2.170148D-02
 Lowest energy point so far.  Saving SCF results.
 GradGradGradGradGradGradGradGradGradGradGradGradGradGradGradGradGradGrad

 Leave Link  103 at Wed May 31 23:02:22 2023, MaxMem=  2684354560 cpu:               0.3 elap:               0.0
 (Enter /home/xut/apps/g16/l202.exe)
                          Input orientation:                          
 ---------------------------------------------------------------------
 Center     Atomic      Atomic             Coordinates (Angstroms)
 Number     Number       Type             X           Y           Z
 ---------------------------------------------------------------------
      1          6           0       -0.232093    1.402744    0.020883
      2          6           0       -1.638601    1.191352    0.003499
      3          6           0       -2.164018   -0.108485    0.001207
      4          6           0       -1.326193   -1.185696    0.026636
      5          6           0        0.125050   -0.975608    0.055084
      6          6           0        0.632825    0.331619    0.041508
      7          1           0       -2.299340    2.047701   -0.015655
      8          1           0       -1.675396   -2.205304    0.031597
      9          6           0       -3.670182   -0.237928   -0.031454
     10          8           0       -4.248252   -1.408441   -0.047370
     11          1           0       -3.681151   -2.189425   -0.037389
     12          8           0       -4.355732    0.773209   -0.050263
     13          8           0        0.843312   -2.050782    0.094959
     14          1           0        1.799403   -1.923661    0.130635
     15          8           0        1.994061    0.603418    0.031188
     16          1           0        2.120745    1.464429    0.457839
     17          8           0        0.277087    2.609610    0.016511
     18          1           0       -0.371002    3.327039    0.004352
     19         24           0        4.148950   -0.119114   -0.148894
 ---------------------------------------------------------------------
                    Distance matrix (angstroms):
                    1          2          3          4          5
     1  C    0.000000
     2  C    1.422411   0.000000
     3  C    2.452863   1.402014   0.000000
     4  C    2.810180   2.397601   1.364910   0.000000
     5  C    2.405260   2.794430   2.448394   1.466646   0.000000
     6  C    1.376887   2.428984   2.831545   2.477946   1.402448
     7  H    2.165829   1.081793   2.160494   3.376930   3.875960
     8  H    3.886033   3.396972   2.153213   1.077761   2.180439
     9  C    3.809856   2.484227   1.512070   2.529017   3.867227
    10  O    4.902750   3.683991   2.456884   2.931471   4.395863
    11  H    4.980269   3.950106   2.575557   2.560742   3.996131
    12  O    4.172023   2.749643   2.362974   3.608508   4.811118
    13  O    3.617848   4.084077   3.581247   2.336619   1.293634
    14  H    3.899230   4.641050   4.361229   3.213216   1.925610
    15  O    2.365330   3.680036   4.218687   3.771609   2.446854
    16  H    2.393864   3.796535   4.587131   4.369266   3.177860
    17  O    1.309889   2.383587   3.653391   4.120067   3.588647
    18  H    1.929373   2.483539   3.875273   4.612772   4.331444
    19  Cr   4.640950   5.936017   6.314761   5.580824   4.119097
                    6          7          8          9         10
     6  C    0.000000
     7  H    3.397911   0.000000
     8  H    3.429863   4.298790   0.000000
     9  C    4.341150   2.665250   2.802449   0.000000
    10  O    5.182724   3.967894   2.694589   1.305573   0.000000
    11  H    4.997227   4.456805   2.007003   1.951538   0.965215
    12  O    5.008905   2.419561   4.007797   1.221773   2.184298
    13  O    2.392278   5.165854   2.524239   4.865598   5.133895
    14  H    2.540696   5.709011   3.487601   5.725761   6.072172
    15  O    1.388144   4.530059   4.621021   5.726730   6.558980
    16  H    1.915855   4.483476   5.297105   6.055764   7.005195
    17  O    2.305736   2.637186   5.195750   4.867413   6.052067
    18  H    3.159366   2.314216   5.684102   4.857454   6.120500
    19  Cr   3.550007   6.803917   6.189328   7.820917   8.496215
                   11         12         13         14         15
    11  H    0.000000
    12  O    3.038491   0.000000
    13  O    4.528520   5.918282   0.000000
    14  H    5.489566   6.722464   0.965165   0.000000
    15  O    6.325559   6.352584   2.893625   2.536516   0.000000
    16  H    6.874438   6.533048   3.757689   3.418988   0.969237
    17  O    6.221036   4.983958   4.695318   4.783411   2.640647
    18  H    6.433522   4.733192   5.513957   5.682997   3.607264
    19  Cr   8.099944   8.551934   3.836411   2.975718   2.279919
                   16         17         18         19
    16  H    0.000000
    17  O    2.214788   0.000000
    18  H    3.143846   0.966888   0.000000
    19  Cr   2.643738   4.739686   5.685897   0.000000
 Stoichiometry    C7H6CrO5(3+,4)
 Framework group  C1[X(C7H6CrO5)]
 Deg. of freedom    51
 Full point group                 C1      NOp   1
 RotChk:  IX=0 Diff= 3.86D-02
 Largest Abelian subgroup         C1      NOp   1
 Largest concise Abelian subgroup C1      NOp   1
                         Standard orientation:                         
 ---------------------------------------------------------------------
 Center     Atomic      Atomic             Coordinates (Angstroms)
 Number     Number       Type             X           Y           Z
 ---------------------------------------------------------------------
      1          6           0       -0.214383    1.369557    0.035419
      2          6           0       -1.625643    1.194362    0.005288
      3          6           0       -2.184246   -0.091547   -0.001326
      4          6           0       -1.374646   -1.189914    0.032129
      5          6           0        0.081196   -1.017165    0.073732
      6          6           0        0.622500    0.276574    0.064315
      7          1           0       -2.263955    2.067393   -0.020198
      8          1           0       -1.749967   -2.200210    0.034274
      9          6           0       -3.692880   -0.182268   -0.047671
     10          8           0       -4.300670   -1.337552   -0.068435
     11          1           0       -3.753940   -2.132843   -0.053003
     12          8           0       -4.352020    0.846137   -0.073094
     13          8           0        0.771198   -2.110415    0.120541
     14          1           0        1.729877   -2.007881    0.164888
     15          8           0        1.990308    0.513303    0.066309
     16          1           0        2.135187    1.371029    0.493787
     17          8           0        0.325661    2.562939    0.035255
     18          1           0       -0.303640    3.296775    0.016929
     19         24           0        4.127468   -0.264465   -0.093858
 ---------------------------------------------------------------------
 Rotational constants (GHZ):           1.5471182           0.2704737           0.2305144
 Leave Link  202 at Wed May 31 23:02:23 2023, MaxMem=  2684354560 cpu:               0.1 elap:               0.0
 (Enter /home/xut/apps/g16/l301.exe)
 Basis read from rwf:  (5D, 7F)
 Pseudo-potential data read from rwf file.
 There are   342 symmetry adapted cartesian basis functions of A   symmetry.
 There are   328 symmetry adapted basis functions of A   symmetry.
   328 basis functions,   538 primitive gaussians,   342 cartesian basis functions
    51 alpha electrons       48 beta electrons
       nuclear repulsion energy       827.7689471053 Hartrees.
 IExCor= 4336 DFT=T Ex+Corr=M062X ExCW=0 ScaHFX=  0.540000
 ScaDFX=  1.000000  1.000000  1.000000  1.000000 ScalE2=  1.000000  1.000000
 IRadAn=      5 IRanWt=     -1 IRanGd=            0 ICorTp=0 IEmpDi=  4
 NAtoms=   19 NActive=   19 NUniq=   19 SFac= 1.00D+00 NAtFMM=   60 NAOKFM=F Big=F
 Integral buffers will be    131072 words long.
 Raffenetti 2 integral format.
 Two-electron integral symmetry is turned on.
 No density basis found on file   724.
 ------------------------------------------------------------------------------
 Polarizable Continuum Model (PCM)
 =================================
 Model                : PCM.
 Atomic radii         : SMD-Coulomb.
 Polarization charges : Total charges.
 Charge compensation  : None.
 Solution method      : On-the-fly selection.
 Cavity type          : VdW (van der Waals Surface) (Alpha=1.000).
 Cavity algorithm     : GePol (No added spheres)
                        Default sphere list used, NSphG=   19.
                        Lebedev-Laikov grids with approx.  5.0 points / Ang**2.
                        Smoothing algorithm: York/Karplus (Gamma=1.0000).
                        Polarization charges: spherical gaussians, with
                                              point-specific exponents (IZeta= 3).
                        Self-potential: point-specific (ISelfS= 7).
                        Self-field    : sphere-specific E.n sum rule (ISelfD= 2).
 1st derivatives      : Analytical E(r).r(x)/FMM algorithm (CHGder, D1EAlg=3).
                        Cavity 1st derivative terms included.
 Solvent              : Water, Eps=  78.355300 Eps(inf)=   1.777849
 ------------------------------------------------------------------------------
 Spheres list:
 ISph  on   Nord     Re0    Alpha      Xe            Ye            Ze
    1   C      1    1.8500  1.000     -0.214383      1.369557      0.035419
    2   C      2    1.8500  1.000     -1.625643      1.194362      0.005288
    3   C      3    1.8500  1.000     -2.184246     -0.091547     -0.001326
    4   C      4    1.8500  1.000     -1.374646     -1.189914      0.032129
    5   C      5    1.8500  1.000      0.081196     -1.017165      0.073732
    6   C      6    1.8500  1.000      0.622500      0.276574      0.064315
    7   H      7    1.2000  1.000     -2.263955      2.067393     -0.020198
    8   H      8    1.2000  1.000     -1.749967     -2.200210      0.034274
    9   C      9    1.8500  1.000     -3.692880     -0.182268     -0.047671
   10   O     10    1.5200  1.000     -4.300670     -1.337552     -0.068435
   11   H     11    1.2000  1.000     -3.753940     -2.132843     -0.053003
   12   O     12    1.5200  1.000     -4.352020      0.846137     -0.073094
   13   O     13    1.5200  1.000      0.771198     -2.110415      0.120541
   14   H     14    1.2000  1.000      1.729877     -2.007881      0.164888
   15   O     15    1.5200  1.000      1.990308      0.513303      0.066309
   16   H     16    1.2000  1.000      2.135187      1.371029      0.493787
   17   O     17    1.5200  1.000      0.325661      2.562939      0.035255
   18   H     18    1.2000  1.000     -0.303640      3.296775      0.016929
   19  Cr     19    1.5115  1.000      4.127468     -0.264465     -0.093858
 ------------------------------------------------------------------------------
 GePol: Number of generator spheres                  =      19
 GePol: Total number of spheres                      =      19
 GePol: Number of exposed spheres                    =      19 (100.00%)
 GePol: Number of points                             =    1484
 GePol: Average weight of points                     =       0.13
 GePol: Minimum weight of points                     =   0.23D-10
 GePol: Maximum weight of points                     =    0.21991
 GePol: Number of points with low weight             =      84
 GePol: Fraction of low-weight points (<1% of avg)   =       5.66%
 GePol: Cavity surface area                          =    190.704 Ang**2
 GePol: Cavity volume                                =    155.757 Ang**3
 ------------------------------------------------------------------------------
 Atomic radii for non-electrostatic terms: SMD-CDS.
 ------------------------------------------------------------------------------
 PCM non-electrostatic energy =         0.0107431202 Hartrees.
 Nuclear repulsion after PCM non-electrostatic terms =      827.7796902255 Hartrees.
 Leave Link  301 at Wed May 31 23:02:23 2023, MaxMem=  2684354560 cpu:               0.5 elap:               0.1
 (Enter /home/xut/apps/g16/l302.exe)
 NPDir=0 NMtPBC=     1 NCelOv=     1 NCel=       1 NClECP=     1 NCelD=      1
         NCelK=      1 NCelE2=     1 NClLst=     1 CellRange=     0.0.
 One-electron integrals computed using PRISM.
 One-electron integral symmetry used in STVInt
   1 Symmetry operations used in ECPInt.
 ECPInt:  NShTT=    6105 NPrTT=   23469 LenC2=    5793 LenP2D=   15743.
 LDataN:  DoStor=T MaxTD1= 4 Len=   56
 NBasis=   328 RedAO= T EigKep=  1.40D-06  NBF=   328
 NBsUse=   327 1.00D-06 EigRej=  5.68D-07 NBFU=   327
 Precomputing XC quadrature grid using
 IXCGrd= 4 IRadAn=           5 IRanWt=          -1 IRanGd=           0 AccXCQ= 0.00D+00.
 Generated NRdTot=       0 NPtTot=           0 NUsed=           0 NTot=          32
 NSgBfM=   342   342   342   342   342 MxSgAt=    19 MxSgA2=    19.
 Leave Link  302 at Wed May 31 23:02:23 2023, MaxMem=  2684354560 cpu:               2.6 elap:               0.3
 (Enter /home/xut/apps/g16/l303.exe)
 DipDrv:  MaxL=1.
 Leave Link  303 at Wed May 31 23:02:23 2023, MaxMem=  2684354560 cpu:               0.3 elap:               0.0
 (Enter /home/xut/apps/g16/l401.exe)
 Initial guess from the checkpoint file:  "149-91-7-para15-Cr.chk"
 B after Tr=     0.000000   -0.000000   -0.000000
         Rot=    0.999975   -0.002658    0.000358    0.006478 Ang=  -0.80 deg.
 Guess basis will be translated and rotated to current coordinates.
 JPrj=2 DoOrth=T DoCkMO=T.
 Initial guess <Sx>= 0.0000 <Sy>= 0.0000 <Sz>= 1.5000 <S**2>= 4.7399 S= 1.7338
 Generating alternative initial guess.
 ExpMin= 1.90D-02 ExpMax= 8.59D+03 ExpMxC= 1.30D+03 IAcc=3 IRadAn=         5 AccDes= 0.00D+00
 Harris functional with IExCor= 1009 and IRadAn=       5 diagonalized for initial guess.
 HarFok:  IExCor= 1009 AccDes= 0.00D+00 IRadAn=         5 IDoV= 1 UseB2=F ITyADJ=14
 ICtDFT=  3500011 ScaDFX=  1.000000  1.000000  1.000000  1.000000
 FoFCou: FMM=F IPFlag=           0 FMFlag=      100000 FMFlg1=           0
         NFxFlg=           0 DoJE=T BraDBF=F KetDBF=T FulRan=T
         wScrn=  0.000000 ICntrl=       500 IOpCl=  0 I1Cent=   200000004 NGrid=           0
         NMat0=    1 NMatS0=      1 NMatT0=    0 NMatD0=    1 NMtDS0=    0 NMtDT0=    0
 Petite list used in FoFCou.
 Harris En= -732.137845372826    
 Leave Link  401 at Wed May 31 23:02:24 2023, MaxMem=  2684354560 cpu:              10.5 elap:               1.1
 (Enter /home/xut/apps/g16/l502.exe)
 Integral symmetry usage will be decided dynamically.
 UHF open shell SCF:
 Using DIIS extrapolation, IDIIS=  1040.
 NGot=  2684354560 LenX=  2684113999 LenY=  2683996594
 Requested convergence on RMS density matrix=1.00D-05 within 128 cycles.
 Requested convergence on MAX density matrix=1.00D-03.
 Requested convergence on             energy=1.00D-03.
 No special actions if energy rises.
 Fock matrices will be formed incrementally for  20 cycles.

 Cycle   1  Pass 1  IDiag  1:
 FoFJK:  IHMeth= 1 ICntrl=       0 DoSepK=F KAlg= 0 I1Cent=           0 FoldK=F
 IRaf= 910000000 NMat=       1 IRICut=       1 DoRegI=T DoRafI=F ISym2E= 0 IDoP0=0 IntGTp=1.
 FoFCou: FMM=F IPFlag=           0 FMFlag=      100000 FMFlg1=           0
         NFxFlg=           0 DoJE=F BraDBF=F KetDBF=F FulRan=T
         wScrn=  0.000000 ICntrl=         0 IOpCl=  1 I1Cent=           0 NGrid=           0
         NMat0=    1 NMatS0=      1 NMatT0=    0 NMatD0=    1 NMtDS0=    0 NMtDT0=    0
 Symmetry not used in FoFCou.
 Inv3:  Mode=1 IEnd=     6606768.
 Iteration    1 A*A^-1 deviation from unit magnitude is 3.11D-15 for     32.
 Iteration    1 A*A^-1 deviation from orthogonality  is 1.58D-15 for   1078    712.
 Iteration    1 A^-1*A deviation from unit magnitude is 2.89D-15 for     32.
 Iteration    1 A^-1*A deviation from orthogonality  is 1.15D-12 for   1136   1077.
 E= -732.193079075564    
 DIIS: error= 3.83D-03 at cycle   1 NSaved=   1.
 NSaved= 1 IEnMin= 1 EnMin= -732.193079075564     IErMin= 1 ErrMin= 3.83D-03
 ErrMax= 3.83D-03  0.00D+00 EMaxC= 1.00D-01 BMatC= 6.61D-02 BMatP= 6.61D-02
 IDIUse=3 WtCom= 9.62D-01 WtEn= 3.83D-02
 Coeff-Com:  0.100D+01
 Coeff-En:   0.100D+01
 Coeff:      0.100D+01
 Gap=     0.472 Goal=   None    Shift=    0.000
 Gap=     0.459 Goal=   None    Shift=    0.000
 GapD=    0.459 DampG=2.000 DampE=1.000 DampFc=2.0000 IDamp=-1.
 RMSDP=1.21D-02 MaxDP=1.13D+00              OVMax= 2.38D-02

 Cycle   2  Pass 1  IDiag  1:
 RMSU=  1.15D-02    CP:  1.05D+00
 E= -732.214878089127     Delta-E=       -0.021799013564 Rises=F Damp=F
 DIIS: error= 9.18D-04 at cycle   2 NSaved=   2.
 NSaved= 2 IEnMin= 2 EnMin= -732.214878089127     IErMin= 2 ErrMin= 9.18D-04
 ErrMax= 9.18D-04  0.00D+00 EMaxC= 1.00D-01 BMatC= 2.85D-03 BMatP= 6.61D-02
 IDIUse=3 WtCom= 9.91D-01 WtEn= 9.18D-03
 Coeff-Com: -0.359D-01 0.104D+01
 Coeff-En:   0.000D+00 0.100D+01
 Coeff:     -0.355D-01 0.104D+01
 Gap=     0.283 Goal=   None    Shift=    0.000
 Gap=     0.156 Goal=   None    Shift=    0.000
 RMSDP=1.30D-03 MaxDP=8.62D-02 DE=-2.18D-02 OVMax= 7.17D-03

 Cycle   3  Pass 1  IDiag  1:
 RMSU=  9.40D-04    CP:  1.05D+00  1.08D+00
 E= -732.215451903047     Delta-E=       -0.000573813919 Rises=F Damp=F
 DIIS: error= 9.27D-04 at cycle   3 NSaved=   3.
 NSaved= 3 IEnMin= 3 EnMin= -732.215451903047     IErMin= 2 ErrMin= 9.18D-04
 ErrMax= 9.27D-04  0.00D+00 EMaxC= 1.00D-01 BMatC= 1.88D-03 BMatP= 2.85D-03
 IDIUse=3 WtCom= 9.91D-01 WtEn= 9.27D-03
 Coeff-Com: -0.535D-01 0.477D+00 0.577D+00
 Coeff-En:   0.000D+00 0.000D+00 0.100D+01
 Coeff:     -0.530D-01 0.472D+00 0.581D+00
 Gap=     0.282 Goal=   None    Shift=    0.000
 Gap=     0.155 Goal=   None    Shift=    0.000
 RMSDP=3.19D-04 MaxDP=1.98D-02 DE=-5.74D-04 OVMax= 5.58D-03

 Cycle   4  Pass 1  IDiag  1:
 RMSU=  2.57D-04    CP:  1.05D+00  1.09D+00  1.04D+00
 E= -732.215803736275     Delta-E=       -0.000351833228 Rises=F Damp=F
 DIIS: error= 2.81D-04 at cycle   4 NSaved=   4.
 NSaved= 4 IEnMin= 4 EnMin= -732.215803736275     IErMin= 4 ErrMin= 2.81D-04
 ErrMax= 2.81D-04  0.00D+00 EMaxC= 1.00D-01 BMatC= 1.15D-04 BMatP= 1.88D-03
 IDIUse=3 WtCom= 9.97D-01 WtEn= 2.81D-03
 Coeff-Com: -0.143D-01 0.634D-01 0.214D+00 0.736D+00
 Coeff-En:   0.000D+00 0.000D+00 0.000D+00 0.100D+01
 Coeff:     -0.142D-01 0.632D-01 0.214D+00 0.737D+00
 Gap=     0.281 Goal=   None    Shift=    0.000
 Gap=     0.155 Goal=   None    Shift=    0.000
 RMSDP=1.16D-04 MaxDP=1.04D-02 DE=-3.52D-04 OVMax= 1.60D-03

 Cycle   5  Pass 1  IDiag  1:
 RMSU=  8.12D-05    CP:  1.05D+00  1.09D+00  1.12D+00  1.07D+00
 E= -732.215829472156     Delta-E=       -0.000025735881 Rises=F Damp=F
 DIIS: error= 1.28D-04 at cycle   5 NSaved=   5.
 NSaved= 5 IEnMin= 5 EnMin= -732.215829472156     IErMin= 5 ErrMin= 1.28D-04
 ErrMax= 1.28D-04  0.00D+00 EMaxC= 1.00D-01 BMatC= 1.49D-05 BMatP= 1.15D-04
 IDIUse=3 WtCom= 9.99D-01 WtEn= 1.28D-03
 Coeff-Com: -0.510D-04-0.272D-01 0.271D-01 0.297D+00 0.703D+00
 Coeff-En:   0.000D+00 0.000D+00 0.000D+00 0.000D+00 0.100D+01
 Coeff:     -0.510D-04-0.272D-01 0.271D-01 0.297D+00 0.703D+00
 Gap=     0.281 Goal=   None    Shift=    0.000
 Gap=     0.155 Goal=   None    Shift=    0.000
 RMSDP=6.81D-05 MaxDP=8.38D-03 DE=-2.57D-05 OVMax= 1.22D-03

 Cycle   6  Pass 1  IDiag  1:
 RMSU=  3.97D-05    CP:  1.05D+00  1.09D+00  1.16D+00  1.08D+00  1.09D+00
 E= -732.215835456364     Delta-E=       -0.000005984209 Rises=F Damp=F
 DIIS: error= 5.99D-05 at cycle   6 NSaved=   6.
 NSaved= 6 IEnMin= 6 EnMin= -732.215835456364     IErMin= 6 ErrMin= 5.99D-05
 ErrMax= 5.99D-05  0.00D+00 EMaxC= 1.00D-01 BMatC= 2.91D-06 BMatP= 1.49D-05
 IDIUse=1 WtCom= 1.00D+00 WtEn= 0.00D+00
 Coeff-Com:  0.185D-02-0.202D-01-0.142D-01 0.290D-01 0.284D+00 0.719D+00
 Coeff:      0.185D-02-0.202D-01-0.142D-01 0.290D-01 0.284D+00 0.719D+00
 Gap=     0.282 Goal=   None    Shift=    0.000
 Gap=     0.155 Goal=   None    Shift=    0.000
 RMSDP=2.78D-05 MaxDP=1.97D-03 DE=-5.98D-06 OVMax= 8.41D-04

 Cycle   7  Pass 1  IDiag  1:
 RMSU=  1.57D-05    CP:  1.05D+00  1.09D+00  1.17D+00  1.11D+00  1.20D+00
                    CP:  1.12D+00
 E= -732.215838013081     Delta-E=       -0.000002556717 Rises=F Damp=F
 DIIS: error= 3.72D-05 at cycle   7 NSaved=   7.
 NSaved= 7 IEnMin= 7 EnMin= -732.215838013081     IErMin= 7 ErrMin= 3.72D-05
 ErrMax= 3.72D-05  0.00D+00 EMaxC= 1.00D-01 BMatC= 1.10D-06 BMatP= 2.91D-06
 IDIUse=1 WtCom= 1.00D+00 WtEn= 0.00D+00
 Coeff-Com:  0.604D-03 0.239D-03-0.104D-01-0.707D-01-0.872D-01 0.217D+00
 Coeff-Com:  0.951D+00
 Coeff:      0.604D-03 0.239D-03-0.104D-01-0.707D-01-0.872D-01 0.217D+00
 Coeff:      0.951D+00
 Gap=     0.282 Goal=   None    Shift=    0.000
 Gap=     0.155 Goal=   None    Shift=    0.000
 RMSDP=2.24D-05 MaxDP=2.38D-03 DE=-2.56D-06 OVMax= 1.12D-03

 Cycle   8  Pass 1  IDiag  1:
 RMSU=  6.95D-06    CP:  1.05D+00  1.09D+00  1.18D+00  1.13D+00  1.29D+00
                    CP:  1.33D+00  1.64D+00
 E= -732.215840216165     Delta-E=       -0.000002203084 Rises=F Damp=F
 DIIS: error= 2.90D-05 at cycle   8 NSaved=   8.
 NSaved= 8 IEnMin= 8 EnMin= -732.215840216165     IErMin= 8 ErrMin= 2.90D-05
 ErrMax= 2.90D-05  0.00D+00 EMaxC= 1.00D-01 BMatC= 6.03D-07 BMatP= 1.10D-06
 IDIUse=1 WtCom= 1.00D+00 WtEn= 0.00D+00
 Coeff-Com: -0.591D-03 0.858D-02 0.456D-02-0.325D-01-0.132D+00-0.287D+00
 Coeff-Com:  0.253D+00 0.119D+01
 Coeff:     -0.591D-03 0.858D-02 0.456D-02-0.325D-01-0.132D+00-0.287D+00
 Coeff:      0.253D+00 0.119D+01
 Gap=     0.282 Goal=   None    Shift=    0.000
 Gap=     0.155 Goal=   None    Shift=    0.000
 RMSDP=2.06D-05 MaxDP=2.43D-03 DE=-2.20D-06 OVMax= 1.53D-03

 Cycle   9  Pass 1  IDiag  1:
 RMSU=  8.20D-06    CP:  1.05D+00  1.09D+00  1.19D+00  1.14D+00  1.37D+00
                    CP:  1.42D+00  2.30D+00  2.01D+00
 E= -732.215842385706     Delta-E=       -0.000002169541 Rises=F Damp=F
 DIIS: error= 2.06D-05 at cycle   9 NSaved=   9.
 NSaved= 9 IEnMin= 9 EnMin= -732.215842385706     IErMin= 9 ErrMin= 2.06D-05
 ErrMax= 2.06D-05  0.00D+00 EMaxC= 1.00D-01 BMatC= 4.26D-07 BMatP= 6.03D-07
 IDIUse=1 WtCom= 1.00D+00 WtEn= 0.00D+00
 Coeff-Com: -0.380D-03 0.305D-02 0.469D-02 0.479D-02-0.142D-01-0.176D+00
 Coeff-Com: -0.160D+00 0.430D+00 0.907D+00
 Coeff:     -0.380D-03 0.305D-02 0.469D-02 0.479D-02-0.142D-01-0.176D+00
 Coeff:     -0.160D+00 0.430D+00 0.907D+00
 Gap=     0.282 Goal=   None    Shift=    0.000
 Gap=     0.155 Goal=   None    Shift=    0.000
 RMSDP=1.18D-05 MaxDP=1.33D-03 DE=-2.17D-06 OVMax= 1.14D-03

 Cycle  10  Pass 1  IDiag  1:
 RMSU=  2.98D-06    CP:  1.05D+00  1.09D+00  1.20D+00  1.15D+00  1.38D+00
                    CP:  1.43D+00  2.58D+00  2.82D+00  1.85D+00
 E= -732.215843724782     Delta-E=       -0.000001339076 Rises=F Damp=F
 DIIS: error= 1.88D-05 at cycle  10 NSaved=  10.
 NSaved=10 IEnMin=10 EnMin= -732.215843724782     IErMin=10 ErrMin= 1.88D-05
 ErrMax= 1.88D-05  0.00D+00 EMaxC= 1.00D-01 BMatC= 3.48D-07 BMatP= 4.26D-07
 IDIUse=1 WtCom= 1.00D+00 WtEn= 0.00D+00
 Coeff-Com:  0.157D-03-0.286D-02-0.483D-03 0.134D-01 0.603D-01 0.571D-01
 Coeff-Com: -0.140D+00-0.317D+00 0.107D+00 0.122D+01
 Coeff:      0.157D-03-0.286D-02-0.483D-03 0.134D-01 0.603D-01 0.571D-01
 Coeff:     -0.140D+00-0.317D+00 0.107D+00 0.122D+01
 Gap=     0.282 Goal=   None    Shift=    0.000
 Gap=     0.155 Goal=   None    Shift=    0.000
 RMSDP=1.21D-05 MaxDP=1.13D-03 DE=-1.34D-06 OVMax= 1.35D-03

 Cycle  11  Pass 1  IDiag  1:
 RMSU=  5.93D-06    CP:  1.05D+00  1.09D+00  1.20D+00  1.15D+00  1.37D+00
                    CP:  1.40D+00  2.69D+00  3.00D+00  2.82D+00  2.38D+00
 E= -732.215845222128     Delta-E=       -0.000001497346 Rises=F Damp=F
 DIIS: error= 1.77D-05 at cycle  11 NSaved=  11.
 NSaved=11 IEnMin=11 EnMin= -732.215845222128     IErMin=11 ErrMin= 1.77D-05
 ErrMax= 1.77D-05  0.00D+00 EMaxC= 1.00D-01 BMatC= 3.35D-07 BMatP= 3.48D-07
 IDIUse=1 WtCom= 1.00D+00 WtEn= 0.00D+00
 Coeff-Com:  0.143D-03-0.151D-02-0.147D-02 0.107D-03 0.190D-01 0.611D-01
 Coeff-Com:  0.145D-01-0.172D+00-0.434D+00 0.481D+00 0.103D+01
 Coeff:      0.143D-03-0.151D-02-0.147D-02 0.107D-03 0.190D-01 0.611D-01
 Coeff:      0.145D-01-0.172D+00-0.434D+00 0.481D+00 0.103D+01
 Gap=     0.282 Goal=   None    Shift=    0.000
 Gap=     0.155 Goal=   None    Shift=    0.000
 RMSDP=1.11D-05 MaxDP=1.01D-03 DE=-1.50D-06 OVMax= 1.31D-03

 Cycle  12  Pass 1  IDiag  1:
 RMSU=  6.09D-06    CP:  1.05D+00  1.10D+00  1.21D+00  1.15D+00  1.37D+00
                    CP:  1.38D+00  2.78D+00  3.00D+00  3.00D+00  3.00D+00
                    CP:  2.09D+00
 E= -732.215846643415     Delta-E=       -0.000001421287 Rises=F Damp=F
 DIIS: error= 1.72D-05 at cycle  12 NSaved=  12.
 NSaved=12 IEnMin=12 EnMin= -732.215846643415     IErMin=12 ErrMin= 1.72D-05
 ErrMax= 1.72D-05  0.00D+00 EMaxC= 1.00D-01 BMatC= 3.20D-07 BMatP= 3.35D-07
 IDIUse=1 WtCom= 1.00D+00 WtEn= 0.00D+00
 Coeff-Com: -0.983D-04 0.214D-02 0.370D-03-0.115D-01-0.439D-01-0.381D-01
 Coeff-Com:  0.113D+00 0.307D+00-0.298D+00-0.719D+00-0.920D-01 0.178D+01
 Coeff:     -0.983D-04 0.214D-02 0.370D-03-0.115D-01-0.439D-01-0.381D-01
 Coeff:      0.113D+00 0.307D+00-0.298D+00-0.719D+00-0.920D-01 0.178D+01
 Gap=     0.282 Goal=   None    Shift=    0.000
 Gap=     0.155 Goal=   None    Shift=    0.000
 RMSDP=1.79D-05 MaxDP=1.26D-03 DE=-1.42D-06 OVMax= 2.24D-03

 Cycle  13  Pass 1  IDiag  1:
 RMSU=  6.62D-06    CP:  1.05D+00  1.10D+00  1.21D+00  1.15D+00  1.38D+00
                    CP:  1.36D+00  2.87D+00  3.00D+00  3.00D+00  3.00D+00
                    CP:  3.00D+00  3.00D+00
 E= -732.215849043513     Delta-E=       -0.000002400098 Rises=F Damp=F
 DIIS: error= 1.66D-05 at cycle  13 NSaved=  13.
 NSaved=13 IEnMin=13 EnMin= -732.215849043513     IErMin=13 ErrMin= 1.66D-05
 ErrMax= 1.66D-05  0.00D+00 EMaxC= 1.00D-01 BMatC= 3.09D-07 BMatP= 3.20D-07
 IDIUse=1 WtCom= 1.00D+00 WtEn= 0.00D+00
 Coeff-Com: -0.110D-03 0.120D-02 0.128D-02-0.617D-03-0.148D-01-0.490D-01
 Coeff-Com: -0.217D-01 0.167D+00 0.243D+00-0.302D+00-0.860D+00 0.125D+00
 Coeff-Com:  0.171D+01
 Coeff:     -0.110D-03 0.120D-02 0.128D-02-0.617D-03-0.148D-01-0.490D-01
 Coeff:     -0.217D-01 0.167D+00 0.243D+00-0.302D+00-0.860D+00 0.125D+00
 Coeff:      0.171D+01
 Gap=     0.282 Goal=   None    Shift=    0.000
 Gap=     0.155 Goal=   None    Shift=    0.000
 RMSDP=2.32D-05 MaxDP=1.64D-03 DE=-2.40D-06 OVMax= 3.00D-03

 Cycle  14  Pass 1  IDiag  1:
 RMSU=  1.50D-05    CP:  1.05D+00  1.10D+00  1.22D+00  1.15D+00  1.37D+00
                    CP:  1.33D+00  3.00D+00  3.00D+00  3.00D+00  3.00D+00
                    CP:  3.00D+00  3.00D+00  3.00D+00
 E= -732.215852216232     Delta-E=       -0.000003172719 Rises=F Damp=F
 DIIS: error= 1.60D-05 at cycle  14 NSaved=  14.
 NSaved=14 IEnMin=14 EnMin= -732.215852216232     IErMin=14 ErrMin= 1.60D-05
 ErrMax= 1.60D-05  0.00D+00 EMaxC= 1.00D-01 BMatC= 3.02D-07 BMatP= 3.09D-07
 IDIUse=1 WtCom= 1.00D+00 WtEn= 0.00D+00
 Coeff-Com:  0.239D-04-0.953D-03 0.333D-03 0.731D-02 0.235D-01 0.986D-02
 Coeff-Com: -0.782D-01-0.135D+00 0.264D+00 0.353D+00-0.174D+00-0.113D+01
 Coeff-Com:  0.566D+00 0.129D+01
 Coeff:      0.239D-04-0.953D-03 0.333D-03 0.731D-02 0.235D-01 0.986D-02
 Coeff:     -0.782D-01-0.135D+00 0.264D+00 0.353D+00-0.174D+00-0.113D+01
 Coeff:      0.566D+00 0.129D+01
 Gap=     0.282 Goal=   None    Shift=    0.000
 Gap=     0.155 Goal=   None    Shift=    0.000
 RMSDP=2.02D-05 MaxDP=1.47D-03 DE=-3.17D-06 OVMax= 2.66D-03

 Cycle  15  Pass 1  IDiag  1:
 RMSU=  1.20D-05    CP:  1.05D+00  1.10D+00  1.22D+00  1.15D+00  1.37D+00
                    CP:  1.30D+00  3.00D+00  3.00D+00  3.00D+00  3.00D+00
                    CP:  3.00D+00  3.00D+00  3.00D+00  2.02D+00
 E= -732.215855020205     Delta-E=       -0.000002803973 Rises=F Damp=F
 DIIS: error= 1.59D-05 at cycle  15 NSaved=  15.
 NSaved=15 IEnMin=15 EnMin= -732.215855020205     IErMin=15 ErrMin= 1.59D-05
 ErrMax= 1.59D-05  0.00D+00 EMaxC= 1.00D-01 BMatC= 2.98D-07 BMatP= 3.02D-07
 IDIUse=1 WtCom= 1.00D+00 WtEn= 0.00D+00
 Coeff-Com:  0.424D-04-0.655D-03-0.319D-03 0.236D-02 0.112D-01 0.226D-01
 Coeff-Com: -0.100D-01-0.105D+00 0.468D-02 0.144D+00 0.305D+00-0.338D+00
 Coeff-Com: -0.488D+00 0.423D+00 0.103D+01
 Coeff:      0.424D-04-0.655D-03-0.319D-03 0.236D-02 0.112D-01 0.226D-01
 Coeff:     -0.100D-01-0.105D+00 0.468D-02 0.144D+00 0.305D+00-0.338D+00
 Coeff:     -0.488D+00 0.423D+00 0.103D+01
 Gap=     0.282 Goal=   None    Shift=    0.000
 Gap=     0.155 Goal=   None    Shift=    0.000
 RMSDP=1.18D-05 MaxDP=8.91D-04 DE=-2.80D-06 OVMax= 1.58D-03

 Cycle  16  Pass 1  IDiag  1:
 RMSU=  1.16D-06    CP:  1.05D+00  1.10D+00  1.22D+00  1.15D+00  1.36D+00
                    CP:  1.29D+00  3.00D+00  3.00D+00  3.00D+00  3.00D+00
                    CP:  3.00D+00  3.00D+00  3.00D+00  2.61D+00  1.60D+00
 E= -732.215856710221     Delta-E=       -0.000001690016 Rises=F Damp=F
 DIIS: error= 1.61D-05 at cycle  16 NSaved=  16.
 NSaved=16 IEnMin=16 EnMin= -732.215856710221     IErMin=15 ErrMin= 1.59D-05
 ErrMax= 1.61D-05  0.00D+00 EMaxC= 1.00D-01 BMatC= 2.98D-07 BMatP= 2.98D-07
 IDIUse=1 WtCom= 1.00D+00 WtEn= 0.00D+00
 Coeff-Com:  0.127D-04-0.109D-03-0.209D-03-0.176D-03 0.346D-03 0.104D-01
 Coeff-Com:  0.129D-01-0.353D-01-0.325D-01-0.284D-01 0.243D+00 0.285D-01
 Coeff-Com: -0.417D+00 0.447D-01 0.462D+00 0.712D+00
 Coeff:      0.127D-04-0.109D-03-0.209D-03-0.176D-03 0.346D-03 0.104D-01
 Coeff:      0.129D-01-0.353D-01-0.325D-01-0.284D-01 0.243D+00 0.285D-01
 Coeff:     -0.417D+00 0.447D-01 0.462D+00 0.712D+00
 Gap=     0.282 Goal=   None    Shift=    0.000
 Gap=     0.155 Goal=   None    Shift=    0.000
 RMSDP=5.96D-06 MaxDP=4.61D-04 DE=-1.69D-06 OVMax= 8.09D-04

 Error on total polarization charges =  0.04588
 SCF Done:  E(UM062X) =  -732.215856710     A.U. after   16 cycles
            NFock= 16  Conv=0.60D-05     -V/T= 2.0644
 <Sx>= 0.0000 <Sy>= 0.0000 <Sz>= 1.5000 <S**2>= 4.7457 S= 1.7351
 <L.S>=  0.00000000000    
 KE= 6.879189696177D+02 PE=-3.315632026533D+03 EE= 1.067717509980D+03
 SMD-CDS (non-electrostatic) energy       (kcal/mol) =       6.74
 (included in total energy above)
 Annihilation of the first spin contaminant:
 S**2 before annihilation     4.7457,   after     3.7852
 Leave Link  502 at Wed May 31 23:03:48 2023, MaxMem=  2684354560 cpu:             832.1 elap:              83.6
 (Enter /home/xut/apps/g16/l701.exe)
 ... and contract with generalized density number  0.
 Compute integral first derivatives.
   1 Symmetry operations used in ECPInt.
 ECPInt:  NShTT=    6105 NPrTT=   23469 LenC2=    5793 LenP2D=   15743.
 LDataN:  DoStor=T MaxTD1= 5 Len=  102
 D1PCM: PCM CHGder 1st derivatives, ID1Alg=3 FixD1E=F DoIter=F DoCFld=F I1PDM=0.
 GePol: Maximum number of non-zero 1st derivatives   =     189
 Leave Link  701 at Wed May 31 23:03:49 2023, MaxMem=  2684354560 cpu:               9.7 elap:               1.0
 (Enter /home/xut/apps/g16/l702.exe)
 L702 exits ... SP integral derivatives will be done elsewhere.
 Leave Link  702 at Wed May 31 23:03:49 2023, MaxMem=  2684354560 cpu:               0.2 elap:               0.0
 (Enter /home/xut/apps/g16/l703.exe)
 Integral derivatives from FoFJK, PRISM(SPDF).
 Compute integral first derivatives, UseDBF=F ICtDFT=           0.
 Calling FoFJK, ICntrl=      2127 FMM=F ISym2X=0 I1Cent= 0 IOpClX= 1 NMat=1 NMatS=1 NMatT=0.
 FoFJK:  IHMeth= 1 ICntrl=    2127 DoSepK=F KAlg= 0 I1Cent=           0 FoldK=F
 IRaf=         0 NMat=       1 IRICut=       1 DoRegI=T DoRafI=F ISym2E= 0 IDoP0=0 IntGTp=1.
 FoFCou: FMM=F IPFlag=           0 FMFlag=      100000 FMFlg1=         800
         NFxFlg=           0 DoJE=F BraDBF=F KetDBF=F FulRan=T
         wScrn=  0.000000 ICntrl=      2127 IOpCl=  1 I1Cent=           0 NGrid=           0
         NMat0=    1 NMatS0=      1 NMatT0=    0 NMatD0=    1 NMtDS0=    0 NMtDT0=    0
 Symmetry not used in FoFCou.
 Leave Link  703 at Wed May 31 23:04:00 2023, MaxMem=  2684354560 cpu:             113.8 elap:              11.4
 (Enter /home/xut/apps/g16/l716.exe)
 Dipole        = 1.57950097D+01-1.24900250D+00 1.90313666D-01
 ***** Axes restored to original set *****
 -------------------------------------------------------------------
 Center     Atomic                   Forces (Hartrees/Bohr)
 Number     Number              X              Y              Z
 -------------------------------------------------------------------
      1        6          -0.014222479   -0.002366129   -0.001019812
      2        6          -0.002895067   -0.004269790    0.000296091
      3        6          -0.009743206   -0.005660141    0.000200786
      4        6           0.014975320    0.005964337   -0.000052533
      5        6          -0.011832914    0.006915492   -0.000294866
      6        6           0.023136591    0.004625504   -0.001506693
      7        1          -0.000553420    0.001679257   -0.000074317
      8        1           0.002502010   -0.004975853    0.000352037
      9        6           0.000818841    0.033042566   -0.000780216
     10        8          -0.009358082   -0.011928621   -0.000005695
     11        1           0.003534711    0.000947356   -0.000188900
     12        8           0.009199836   -0.015803299    0.000625587
     13        8          -0.005646071   -0.009813332   -0.000418756
     14        1           0.007795742    0.006231339    0.000027332
     15        8          -0.018825293   -0.010243884    0.003250521
     16        1           0.001835545    0.003575991   -0.000738991
     17        8           0.014021083    0.005848441    0.000353921
     18        1          -0.005131502   -0.000240588    0.000321427
     19       24           0.000388356   -0.003528647   -0.000346923
 -------------------------------------------------------------------
 Cartesian Forces:  Max     0.033042566 RMS     0.008439133
 Leave Link  716 at Wed May 31 23:04:00 2023, MaxMem=  2684354560 cpu:               0.2 elap:               0.0
 (Enter /home/xut/apps/g16/l103.exe)

 GradGradGradGradGradGradGradGradGradGradGradGradGradGradGradGradGradGrad
 Berny optimization.
 Using GEDIIS/GDIIS optimizer.
 FormGI is forming the generalized inverse of G from B-inverse, IUseBI=4.
 Internal  Forces:  Max     0.018289341 RMS     0.005461608
 Search for a local minimum.
 Step number   2 out of a maximum of   94
 All quantities printed in internal units (Hartrees-Bohrs-Radians)
 RMS Force = .54616D-02 SwitMx=.10000D-02 MixMth= 1
 Mixed Optimization -- RFO/linear search
 Update second derivatives using D2CorX and points    1    2
 DE= -1.82D-02 DEPred=-2.17D-02 R= 8.38D-01
 TightC=F SS=  1.41D+00  RLast= 3.21D-01 DXNew= 5.0454D-01 9.6408D-01
 Trust test= 8.38D-01 RLast= 3.21D-01 DXMaxT set to 5.05D-01
 ITU=  1  0
 Use linear search instead of GDIIS.
     Eigenvalues ---    0.00237   0.01102   0.01161   0.01300   0.01467
     Eigenvalues ---    0.01655   0.01736   0.01766   0.01973   0.02015
     Eigenvalues ---    0.02280   0.02391   0.02438   0.02997   0.02997
     Eigenvalues ---    0.03004   0.08265   0.14197   0.15999   0.16000
     Eigenvalues ---    0.16000   0.16000   0.16083   0.22311   0.22866
     Eigenvalues ---    0.23473   0.23567   0.24998   0.25000   0.25000
     Eigenvalues ---    0.25000   0.25000   0.26913   0.28593   0.36546
     Eigenvalues ---    0.37097   0.38240   0.39057   0.42247   0.43792
     Eigenvalues ---    0.46397   0.50621   0.53746   0.55213   0.55473
     Eigenvalues ---    0.55473   0.55960   0.66075   0.66833   0.67972
     Eigenvalues ---    0.78351
 RFO step:  Lambda=-1.09443491D-02 EMin= 2.36833559D-03
 Quartic linear search produced a step of  0.25160.
 Iteration  1 RMS(Cart)=  0.08369897 RMS(Int)=  0.00323146
 Iteration  2 RMS(Cart)=  0.00433276 RMS(Int)=  0.00027256
 Iteration  3 RMS(Cart)=  0.00001302 RMS(Int)=  0.00027242
 Iteration  4 RMS(Cart)=  0.00000000 RMS(Int)=  0.00027242
 ITry= 1 IFail=0 DXMaxC= 5.04D-01 DCOld= 1.00D+10 DXMaxT= 5.05D-01 DXLimC= 3.00D+00 Rises=F
 Variable       Old X    -DE/DX   Delta X   Delta X   Delta X     New X
                                 (Linear)    (Quad)   (Total)
    R1        2.68797   0.00450   0.00541   0.01414   0.01955   2.70752
    R2        2.60194   0.00551   0.00799   0.01358   0.02159   2.62353
    R3        2.47533   0.00862   0.00408   0.01603   0.02012   2.49545
    R4        2.64942   0.00124  -0.00214   0.00400   0.00184   2.65126
    R5        2.04429   0.00167   0.00561   0.00616   0.01177   2.05606
    R6        2.57931   0.00441   0.00675   0.01024   0.01697   2.59628
    R7        2.85740  -0.00471  -0.01328  -0.02206  -0.03534   2.82205
    R8        2.77156  -0.01274  -0.03030  -0.05862  -0.08891   2.68265
    R9        2.03667   0.00390   0.00369   0.01311   0.01680   2.05348
   R10        2.65024  -0.00664   0.00275  -0.01794  -0.01516   2.63508
   R11        2.44461   0.00416  -0.00364   0.00731   0.00367   2.44828
   R12        2.62321  -0.01829  -0.01990  -0.05633  -0.07623   2.54698
   R13        2.46717   0.01243   0.00203   0.02284   0.02487   2.49204
   R14        2.30882  -0.01825  -0.01741  -0.02891  -0.04632   2.26249
   R15        1.82399   0.00131   0.00248   0.00310   0.00558   1.82957
   R16        1.82390   0.00855   0.00246   0.01895   0.02141   1.84530
   R17        1.83159   0.00308   0.00439   0.00716   0.01155   1.84314
   R18        4.30842   0.00151   0.01814   0.03054   0.04868   4.35710
   R19        1.82715   0.00326   0.00327   0.00744   0.01071   1.83787
    A1        2.10101  -0.00242  -0.00405  -0.01029  -0.01438   2.08662
    A2        2.11912   0.00503   0.00908   0.02471   0.03373   2.15285
    A3        2.06305  -0.00261  -0.00503  -0.01440  -0.01948   2.04357
    A4        2.10409   0.00015  -0.00337   0.00363   0.00022   2.10431
    A5        2.07890  -0.00067  -0.00099  -0.00700  -0.00799   2.07091
    A6        2.10016   0.00053   0.00436   0.00333   0.00769   2.10785
    A7        2.09628  -0.00324   0.00043  -0.01439  -0.01401   2.08227
    A8        2.04058  -0.00264  -0.01352  -0.01572  -0.02922   2.01137
    A9        2.14632   0.00588   0.01308   0.03011   0.04322   2.18954
   A10        2.08828   0.00162   0.00421   0.00688   0.01104   2.09932
   A11        2.15057   0.00325   0.01126   0.03013   0.04139   2.19195
   A12        2.04433  -0.00487  -0.01547  -0.03705  -0.05251   1.99181
   A13        2.08471   0.00569   0.00342   0.02404   0.02745   2.11216
   A14        2.01633   0.00161  -0.02257   0.00496  -0.01762   1.99872
   A15        2.18214  -0.00730   0.01915  -0.02898  -0.00984   2.17229
   A16        2.09188  -0.00179  -0.00067  -0.01001  -0.01065   2.08123
   A17        2.05281   0.01774  -0.01045   0.08285   0.07237   2.12518
   A18        2.13841  -0.01595   0.01109  -0.07285  -0.06179   2.07663
   A19        2.11537  -0.00453   0.00528  -0.02044  -0.01517   2.10020
   A20        2.08106   0.00371  -0.00336   0.01696   0.01359   2.09465
   A21        2.08674   0.00082  -0.00193   0.00354   0.00160   2.08833
   A22        2.05461  -0.00622  -0.01001  -0.04824  -0.05825   1.99636
   A23        2.02827  -0.00940  -0.01664  -0.07335  -0.08999   1.93828
   A24        1.87427   0.00660  -0.00915   0.04181   0.03138   1.90565
   A25        2.61669  -0.01049   0.01701  -0.04855  -0.03281   2.58388
   A26        1.76477   0.00361  -0.00292   0.02206   0.01784   1.78261
   A27        2.00769  -0.00725  -0.02181  -0.05937  -0.08118   1.92651
    D1       -0.00488  -0.00024  -0.00123  -0.01133  -0.01238  -0.01727
    D2       -3.13833  -0.00020   0.00082  -0.00576  -0.00499   3.13987
    D3        3.13553   0.00031  -0.00153   0.00854   0.00742  -3.14023
    D4        0.00208   0.00035   0.00052   0.01412   0.01482   0.01690
    D5       -0.00795   0.00023  -0.00200   0.00403   0.00212  -0.00583
    D6        3.11998   0.00020  -0.00544   0.00272  -0.00282   3.11716
    D7        3.13478  -0.00031  -0.00171  -0.01524  -0.01650   3.11828
    D8       -0.02048  -0.00034  -0.00515  -0.01655  -0.02143  -0.04191
    D9        0.00404   0.00004   0.00102   0.00069   0.00161   0.00565
   D10       -3.13871   0.00058   0.00073   0.02014   0.02096  -3.11774
   D11        0.00926   0.00008   0.00233   0.00679   0.00915   0.01840
   D12       -3.13142   0.00010   0.00256   0.00916   0.01154  -3.11988
   D13       -3.14058   0.00003   0.00026   0.00110   0.00152  -3.13906
   D14        0.00193   0.00005   0.00048   0.00347   0.00391   0.00584
   D15       -0.00098   0.00008  -0.00025   0.00456   0.00421   0.00323
   D16        3.13560  -0.00011  -0.00151  -0.00477  -0.00665   3.12895
   D17        3.13965   0.00005  -0.00049   0.00202   0.00151   3.14115
   D18       -0.00697  -0.00013  -0.00175  -0.00731  -0.00935  -0.01632
   D19        3.13129  -0.00016  -0.00259  -0.02904  -0.03157   3.09972
   D20       -0.00358  -0.00044  -0.00090  -0.04009  -0.04095  -0.04453
   D21       -0.00937  -0.00014  -0.00236  -0.02657  -0.02897  -0.03833
   D22        3.13895  -0.00041  -0.00067  -0.03761  -0.03835   3.10060
   D23       -0.01167  -0.00016  -0.00294  -0.01198  -0.01504  -0.02671
   D24        3.12709   0.00006  -0.00365  -0.00279  -0.00636   3.12073
   D25        3.13464  -0.00001  -0.00175  -0.00339  -0.00561   3.12903
   D26       -0.00979   0.00021  -0.00246   0.00580   0.00307  -0.00672
   D27        0.01603   0.00001   0.00403   0.00751   0.01160   0.02763
   D28       -3.11120  -0.00025   0.00765   0.00760   0.01532  -3.09589
   D29       -3.12245  -0.00026   0.00482  -0.00269   0.00203  -3.12042
   D30        0.03351  -0.00052   0.00843  -0.00260   0.00575   0.03925
   D31       -3.12233  -0.00032   0.00485  -0.00470   0.00016  -3.12217
   D32        0.01625  -0.00005   0.00409   0.00517   0.00925   0.02550
   D33        0.50286  -0.00161  -0.00522  -0.09690  -0.10210   0.40077
   D34       -2.97550  -0.00048   0.01586   0.01046   0.02649  -2.94901
   D35       -2.65278  -0.00151  -0.00875  -0.09768  -0.10660  -2.75938
   D36        0.15204  -0.00038   0.01233   0.00968   0.02199   0.17403
   D37        0.00022  -0.00034   0.00006  -0.01262  -0.01254  -0.01232
   D38        3.13506  -0.00006  -0.00164  -0.00148  -0.00315   3.13192
         Item               Value     Threshold  Converged?
 Maximum Force            0.018289     0.000450     NO 
 RMS     Force            0.005462     0.000300     NO 
 Maximum Displacement     0.504120     0.001800     NO 
 RMS     Displacement     0.085933     0.001200     NO 
 Predicted change in Energy=-5.369606D-03
 Lowest energy point so far.  Saving SCF results.
 GradGradGradGradGradGradGradGradGradGradGradGradGradGradGradGradGradGrad

 Leave Link  103 at Wed May 31 23:04:00 2023, MaxMem=  2684354560 cpu:               0.2 elap:               0.0
 (Enter /home/xut/apps/g16/l202.exe)
                          Input orientation:                          
 ---------------------------------------------------------------------
 Center     Atomic      Atomic             Coordinates (Angstroms)
 Number     Number       Type             X           Y           Z
 ---------------------------------------------------------------------
      1          6           0       -0.259207    1.441173    0.024485
      2          6           0       -1.670674    1.195412    0.011786
      3          6           0       -2.166383   -0.117078    0.007609
      4          6           0       -1.283630   -1.169413    0.037878
      5          6           0        0.115019   -0.929611    0.076953
      6          6           0        0.622328    0.369045    0.053550
      7          1           0       -2.348263    2.046419   -0.009371
      8          1           0       -1.554267   -2.221765    0.049038
      9          6           0       -3.654417   -0.235699   -0.035135
     10          8           0       -4.226594   -1.422558   -0.090215
     11          1           0       -3.605636   -2.165097   -0.110072
     12          8           0       -4.334520    0.749466   -0.016719
     13          8           0        0.842856   -2.000227    0.127458
     14          1           0        1.792559   -1.777116    0.170184
     15          8           0        1.958090    0.548187    0.038489
     16          1           0        2.165240    1.442760    0.367324
     17          8           0        0.266737    2.652437    0.030460
     18          1           0       -0.434602    3.326225    0.030186
     19         24           0        4.054839   -0.385883   -0.179013
 ---------------------------------------------------------------------
                    Distance matrix (angstroms):
                    1          2          3          4          5
     1  C    0.000000
     2  C    1.432759   0.000000
     3  C    2.462875   1.402988   0.000000
     4  C    2.804422   2.396431   1.373892   0.000000
     5  C    2.400712   2.776450   2.422770   1.419596   0.000000
     6  C    1.388312   2.437722   2.831137   2.449444   1.394424
     7  H    2.175229   1.088020   2.171195   3.387809   3.864191
     8  H    3.885216   3.419362   2.192284   1.086653   2.111151
     9  C    3.787203   2.446532   1.493367   2.549075   3.834414
    10  O    4.894310   3.660178   2.440966   2.956607   4.372705
    11  H    4.921572   3.879684   2.505929   2.530808   3.924879
    12  O    4.133804   2.701066   2.335018   3.604582   4.756730
    13  O    3.615023   4.067349   3.551920   2.284780   1.295576
    14  H    3.819472   4.566728   4.295973   3.138431   1.881780
    15  O    2.390403   3.686128   4.177895   3.668637   2.362684
    16  H    2.448569   3.860289   4.617949   4.338973   3.148947
    17  O    1.320535   2.424217   3.686571   4.124346   3.585561
    18  H    1.893203   2.463448   3.854337   4.575114   4.291435
    19  Cr   4.689407   5.942928   6.229822   5.400019   3.985390
                    6          7          8          9         10
     6  C    0.000000
     7  H    3.412031   0.000000
     8  H    3.383768   4.341801   0.000000
     9  C    4.320201   2.629595   2.891742   0.000000
    10  O    5.171320   3.945689   2.792750   1.318732   0.000000
    11  H    4.931970   4.396362   2.058310   1.931469   0.968167
    12  O    4.971922   2.372206   4.069686   1.197260   2.175946
    13  O    2.380661   5.155319   2.408616   4.833784   5.106898
    14  H    2.447254   5.638978   3.378407   5.664598   6.035207
    15  O    1.347805   4.559788   4.473186   5.667463   6.492358
    16  H    1.905753   4.569247   5.231136   6.070224   7.019611
    17  O    2.311029   2.684599   5.203291   4.870430   6.067138
    18  H    3.140472   2.302513   5.659876   4.801956   6.078210
    19  Cr   3.522233   6.851612   5.906313   7.712061   8.346538
                   11         12         13         14         15
    11  H    0.000000
    12  O    3.005772   0.000000
    13  O    4.457879   5.864029   0.000000
    14  H    5.419371   6.630208   0.976493   0.000000
    15  O    6.191851   6.296070   2.783178   2.334905   0.000000
    16  H    6.822577   6.547903   3.695998   3.247362   0.975349
    17  O    6.182528   4.979467   4.689201   4.687067   2.699741
    18  H    6.342693   4.674532   5.478363   5.569914   3.666407
    19  Cr   7.864682   8.467390   3.607889   2.678690   2.305678
                   16         17         18         19
    16  H    0.000000
    17  O    2.276205   0.000000
    18  H    3.228047   0.972558   0.000000
    19  Cr   2.685703   4.860553   5.829116   0.000000
 Stoichiometry    C7H6CrO5(3+,4)
 Framework group  C1[X(C7H6CrO5)]
 Deg. of freedom    51
 Full point group                 C1      NOp   1
 RotChk:  IX=0 Diff= 5.26D-02
 Largest Abelian subgroup         C1      NOp   1
 Largest concise Abelian subgroup C1      NOp   1
                         Standard orientation:                         
 ---------------------------------------------------------------------
 Center     Atomic      Atomic             Coordinates (Angstroms)
 Number     Number       Type             X           Y           Z
 ---------------------------------------------------------------------
      1          6           0       -0.271514    1.448185    0.027808
      2          6           0       -1.680049    1.187232    0.000771
      3          6           0       -2.161718   -0.130482    0.001495
      4          6           0       -1.268258   -1.173030    0.050501
      5          6           0        0.127217   -0.917963    0.103810
      6          6           0        0.620952    0.385823    0.075757
      7          1           0       -2.366339    2.030740   -0.035119
      8          1           0       -1.527823   -2.228097    0.067055
      9          6           0       -3.647810   -0.265366   -0.057500
     10          8           0       -4.206677   -1.458684   -0.109578
     11          1           0       -3.577683   -2.194667   -0.116232
     12          8           0       -4.338499    0.712577   -0.054937
     13          8           0        0.865737   -1.980288    0.171407
     14          1           0        1.812456   -1.746688    0.223308
     15          8           0        1.954822    0.579130    0.074699
     16          1           0        2.148620    1.478465    0.398650
     17          8           0        0.241440    2.665019    0.030052
     18          1           0       -0.466960    3.331237    0.016204
     19         24           0        4.063759   -0.334143   -0.110953
 ---------------------------------------------------------------------
 Rotational constants (GHZ):           1.5152630           0.2777044           0.2351180
 Leave Link  202 at Wed May 31 23:04:00 2023, MaxMem=  2684354560 cpu:               0.1 elap:               0.0
 (Enter /home/xut/apps/g16/l301.exe)
 Basis read from rwf:  (5D, 7F)
 Pseudo-potential data read from rwf file.
 There are   342 symmetry adapted cartesian basis functions of A   symmetry.
 There are   328 symmetry adapted basis functions of A   symmetry.
   328 basis functions,   538 primitive gaussians,   342 cartesian basis functions
    51 alpha electrons       48 beta electrons
       nuclear repulsion energy       832.7678846396 Hartrees.
 IExCor= 4336 DFT=T Ex+Corr=M062X ExCW=0 ScaHFX=  0.540000
 ScaDFX=  1.000000  1.000000  1.000000  1.000000 ScalE2=  1.000000  1.000000
 IRadAn=      5 IRanWt=     -1 IRanGd=            0 ICorTp=0 IEmpDi=  4
 NAtoms=   19 NActive=   19 NUniq=   19 SFac= 1.00D+00 NAtFMM=   60 NAOKFM=F Big=F
 Integral buffers will be    131072 words long.
 Raffenetti 2 integral format.
 Two-electron integral symmetry is turned on.
 No density basis found on file   724.
 ------------------------------------------------------------------------------
 Polarizable Continuum Model (PCM)
 =================================
 Model                : PCM.
 Atomic radii         : SMD-Coulomb.
 Polarization charges : Total charges.
 Charge compensation  : None.
 Solution method      : On-the-fly selection.
 Cavity type          : VdW (van der Waals Surface) (Alpha=1.000).
 Cavity algorithm     : GePol (No added spheres)
                        Default sphere list used, NSphG=   19.
                        Lebedev-Laikov grids with approx.  5.0 points / Ang**2.
                        Smoothing algorithm: York/Karplus (Gamma=1.0000).
                        Polarization charges: spherical gaussians, with
                                              point-specific exponents (IZeta= 3).
                        Self-potential: point-specific (ISelfS= 7).
                        Self-field    : sphere-specific E.n sum rule (ISelfD= 2).
 1st derivatives      : Analytical E(r).r(x)/FMM algorithm (CHGder, D1EAlg=3).
                        Cavity 1st derivative terms included.
 Solvent              : Water, Eps=  78.355300 Eps(inf)=   1.777849
 ------------------------------------------------------------------------------
 Spheres list:
 ISph  on   Nord     Re0    Alpha      Xe            Ye            Ze
    1   C      1    1.8500  1.000     -0.271514      1.448185      0.027808
    2   C      2    1.8500  1.000     -1.680049      1.187232      0.000771
    3   C      3    1.8500  1.000     -2.161718     -0.130482      0.001495
    4   C      4    1.8500  1.000     -1.268258     -1.173030      0.050501
    5   C      5    1.8500  1.000      0.127217     -0.917963      0.103810
    6   C      6    1.8500  1.000      0.620952      0.385823      0.075757
    7   H      7    1.2000  1.000     -2.366339      2.030740     -0.035119
    8   H      8    1.2000  1.000     -1.527823     -2.228097      0.067055
    9   C      9    1.8500  1.000     -3.647810     -0.265366     -0.057500
   10   O     10    1.5200  1.000     -4.206677     -1.458684     -0.109578
   11   H     11    1.2000  1.000     -3.577683     -2.194667     -0.116232
   12   O     12    1.5200  1.000     -4.338499      0.712577     -0.054937
   13   O     13    1.5200  1.000      0.865737     -1.980288      0.171407
   14   H     14    1.2000  1.000      1.812456     -1.746688      0.223308
   15   O     15    1.5200  1.000      1.954822      0.579130      0.074699
   16   H     16    1.2000  1.000      2.148620      1.478465      0.398650
   17   O     17    1.5200  1.000      0.241440      2.665019      0.030052
   18   H     18    1.2000  1.000     -0.466960      3.331237      0.016204
   19  Cr     19    1.5115  1.000      4.063759     -0.334143     -0.110953
 ------------------------------------------------------------------------------
 GePol: Number of generator spheres                  =      19
 GePol: Total number of spheres                      =      19
 GePol: Number of exposed spheres                    =      19 (100.00%)
 GePol: Number of points                             =    1488
 GePol: Average weight of points                     =       0.13
 GePol: Minimum weight of points                     =   0.20D-09
 GePol: Maximum weight of points                     =    0.21991
 GePol: Number of points with low weight             =      87
 GePol: Fraction of low-weight points (<1% of avg)   =       5.85%
 GePol: Cavity surface area                          =    188.513 Ang**2
 GePol: Cavity volume                                =    155.118 Ang**3
 ------------------------------------------------------------------------------
 Atomic radii for non-electrostatic terms: SMD-CDS.
 ------------------------------------------------------------------------------
 PCM non-electrostatic energy =         0.0106779837 Hartrees.
 Nuclear repulsion after PCM non-electrostatic terms =      832.7785626234 Hartrees.
 Leave Link  301 at Wed May 31 23:04:00 2023, MaxMem=  2684354560 cpu:               0.6 elap:               0.1
 (Enter /home/xut/apps/g16/l302.exe)
 NPDir=0 NMtPBC=     1 NCelOv=     1 NCel=       1 NClECP=     1 NCelD=      1
         NCelK=      1 NCelE2=     1 NClLst=     1 CellRange=     0.0.
 One-electron integrals computed using PRISM.
 One-electron integral symmetry used in STVInt
   1 Symmetry operations used in ECPInt.
 ECPInt:  NShTT=    6105 NPrTT=   23469 LenC2=    5802 LenP2D=   15780.
 LDataN:  DoStor=T MaxTD1= 4 Len=   56
 NBasis=   328 RedAO= T EigKep=  1.47D-06  NBF=   328
 NBsUse=   327 1.00D-06 EigRej=  5.47D-07 NBFU=   327
 Precomputing XC quadrature grid using
 IXCGrd= 4 IRadAn=           5 IRanWt=          -1 IRanGd=           0 AccXCQ= 0.00D+00.
 Generated NRdTot=       0 NPtTot=           0 NUsed=           0 NTot=          32
 NSgBfM=   342   342   342   342   342 MxSgAt=    19 MxSgA2=    19.
 Leave Link  302 at Wed May 31 23:04:00 2023, MaxMem=  2684354560 cpu:               2.2 elap:               0.2
 (Enter /home/xut/apps/g16/l303.exe)
 DipDrv:  MaxL=1.
 Leave Link  303 at Wed May 31 23:04:01 2023, MaxMem=  2684354560 cpu:               0.3 elap:               0.0
 (Enter /home/xut/apps/g16/l401.exe)
 Initial guess from the checkpoint file:  "149-91-7-para15-Cr.chk"
 B after Tr=     0.000000    0.000000    0.000000
         Rot=    0.999965    0.004396   -0.000214   -0.007119 Ang=   0.96 deg.
 Guess basis will be translated and rotated to current coordinates.
 JPrj=2 DoOrth=T DoCkMO=T.
 Initial guess <Sx>= 0.0000 <Sy>= 0.0000 <Sz>= 1.5000 <S**2>= 4.7464 S= 1.7353
 Generating alternative initial guess.
 ExpMin= 1.90D-02 ExpMax= 8.59D+03 ExpMxC= 1.30D+03 IAcc=3 IRadAn=         5 AccDes= 0.00D+00
 Harris functional with IExCor= 1009 and IRadAn=       5 diagonalized for initial guess.
 HarFok:  IExCor= 1009 AccDes= 0.00D+00 IRadAn=         5 IDoV= 1 UseB2=F ITyADJ=14
 ICtDFT=  3500011 ScaDFX=  1.000000  1.000000  1.000000  1.000000
 FoFCou: FMM=F IPFlag=           0 FMFlag=      100000 FMFlg1=           0
         NFxFlg=           0 DoJE=T BraDBF=F KetDBF=T FulRan=T
         wScrn=  0.000000 ICntrl=       500 IOpCl=  0 I1Cent=   200000004 NGrid=           0
         NMat0=    1 NMatS0=      1 NMatT0=    0 NMatD0=    1 NMtDS0=    0 NMtDT0=    0
 Petite list used in FoFCou.
 Harris En= -732.139355253641    
 Leave Link  401 at Wed May 31 23:04:02 2023, MaxMem=  2684354560 cpu:              11.2 elap:               1.1
 (Enter /home/xut/apps/g16/l502.exe)
 Integral symmetry usage will be decided dynamically.
 UHF open shell SCF:
 Using DIIS extrapolation, IDIIS=  1040.
 NGot=  2684354560 LenX=  2684113999 LenY=  2683996594
 Requested convergence on RMS density matrix=1.00D-05 within 128 cycles.
 Requested convergence on MAX density matrix=1.00D-03.
 Requested convergence on             energy=1.00D-03.
 No special actions if energy rises.
 Fock matrices will be formed incrementally for  20 cycles.

 Cycle   1  Pass 1  IDiag  1:
 FoFJK:  IHMeth= 1 ICntrl=       0 DoSepK=F KAlg= 0 I1Cent=           0 FoldK=F
 IRaf= 910000000 NMat=       1 IRICut=       1 DoRegI=T DoRafI=F ISym2E= 0 IDoP0=0 IntGTp=1.
 FoFCou: FMM=F IPFlag=           0 FMFlag=      100000 FMFlg1=           0
         NFxFlg=           0 DoJE=F BraDBF=F KetDBF=F FulRan=T
         wScrn=  0.000000 ICntrl=         0 IOpCl=  1 I1Cent=           0 NGrid=           0
         NMat0=    1 NMatS0=      1 NMatT0=    0 NMatD0=    1 NMtDS0=    0 NMtDT0=    0
 Symmetry not used in FoFCou.
 Inv3:  Mode=1 IEnd=     6642432.
 Iteration    1 A*A^-1 deviation from unit magnitude is 3.44D-15 for    731.
 Iteration    1 A*A^-1 deviation from orthogonality  is 2.03D-15 for   1075    635.
 Iteration    1 A^-1*A deviation from unit magnitude is 3.11D-15 for    731.
 Iteration    1 A^-1*A deviation from orthogonality  is 2.29D-15 for   1023    575.
 E= -732.174751380423    
 DIIS: error= 5.35D-03 at cycle   1 NSaved=   1.
 NSaved= 1 IEnMin= 1 EnMin= -732.174751380423     IErMin= 1 ErrMin= 5.35D-03
 ErrMax= 5.35D-03  0.00D+00 EMaxC= 1.00D-01 BMatC= 1.19D-01 BMatP= 1.19D-01
 IDIUse=3 WtCom= 9.46D-01 WtEn= 5.35D-02
 Coeff-Com:  0.100D+01
 Coeff-En:   0.100D+01
 Coeff:      0.100D+01
 Gap=     0.461 Goal=   None    Shift=    0.000
 Gap=     0.452 Goal=   None    Shift=    0.000
 GapD=    0.452 DampG=2.000 DampE=1.000 DampFc=2.0000 IDamp=-1.
 RMSDP=1.06D-02 MaxDP=1.29D+00              OVMax= 7.05D-02

 Cycle   2  Pass 1  IDiag  1:
 RMSU=  9.46D-03    CP:  1.06D+00
 E= -732.217924532870     Delta-E=       -0.043173152446 Rises=F Damp=F
 DIIS: error= 1.37D-03 at cycle   2 NSaved=   2.
 NSaved= 2 IEnMin= 2 EnMin= -732.217924532870     IErMin= 2 ErrMin= 1.37D-03
 ErrMax= 1.37D-03  0.00D+00 EMaxC= 1.00D-01 BMatC= 3.48D-03 BMatP= 1.19D-01
 IDIUse=3 WtCom= 9.86D-01 WtEn= 1.37D-02
 Coeff-Com: -0.436D-01 0.104D+01
 Coeff-En:   0.000D+00 0.100D+01
 Coeff:     -0.430D-01 0.104D+01
 Gap=     0.275 Goal=   None    Shift=    0.000
 Gap=     0.146 Goal=   None    Shift=    0.000
 RMSDP=2.84D-03 MaxDP=3.23D-01 DE=-4.32D-02 OVMax= 1.99D-02

 Cycle   3  Pass 1  IDiag  1:
 RMSU=  1.90D-03    CP:  1.09D+00  1.07D+00
 E= -732.218567069513     Delta-E=       -0.000642536643 Rises=F Damp=F
 DIIS: error= 1.47D-03 at cycle   3 NSaved=   3.
 NSaved= 3 IEnMin= 3 EnMin= -732.218567069513     IErMin= 2 ErrMin= 1.37D-03
 ErrMax= 1.47D-03  0.00D+00 EMaxC= 1.00D-01 BMatC= 3.20D-03 BMatP= 3.48D-03
 IDIUse=3 WtCom= 9.85D-01 WtEn= 1.47D-02
 Coeff-Com: -0.468D-01 0.532D+00 0.515D+00
 Coeff-En:   0.000D+00 0.144D+00 0.856D+00
 Coeff:     -0.461D-01 0.526D+00 0.520D+00
 Gap=     0.276 Goal=   None    Shift=    0.000
 Gap=     0.147 Goal=   None    Shift=    0.000
 RMSDP=4.92D-04 MaxDP=4.16D-02 DE=-6.43D-04 OVMax= 8.26D-03

 Cycle   4  Pass 1  IDiag  1:
 RMSU=  3.65D-04    CP:  1.08D+00  1.09D+00  9.01D-01
 E= -732.219190759351     Delta-E=       -0.000623689839 Rises=F Damp=F
 DIIS: error= 2.34D-04 at cycle   4 NSaved=   4.
 NSaved= 4 IEnMin= 4 EnMin= -732.219190759351     IErMin= 4 ErrMin= 2.34D-04
 ErrMax= 2.34D-04  0.00D+00 EMaxC= 1.00D-01 BMatC= 6.35D-05 BMatP= 3.20D-03
 IDIUse=3 WtCom= 9.98D-01 WtEn= 2.34D-03
 Coeff-Com: -0.508D-02 0.739D-02 0.103D+00 0.894D+00
 Coeff-En:   0.000D+00 0.000D+00 0.000D+00 0.100D+01
 Coeff:     -0.507D-02 0.737D-02 0.103D+00 0.895D+00
 Gap=     0.275 Goal=   None    Shift=    0.000
 Gap=     0.147 Goal=   None    Shift=    0.000
 RMSDP=2.49D-04 MaxDP=3.10D-02 DE=-6.24D-04 OVMax= 3.43D-03

 Cycle   5  Pass 1  IDiag  1:
 RMSU=  9.61D-05    CP:  1.09D+00  1.10D+00  9.70D-01  9.92D-01
 E= -732.219212021238     Delta-E=       -0.000021261887 Rises=F Damp=F
 DIIS: error= 8.73D-05 at cycle   5 NSaved=   5.
 NSaved= 5 IEnMin= 5 EnMin= -732.219212021238     IErMin= 5 ErrMin= 8.73D-05
 ErrMax= 8.73D-05  0.00D+00 EMaxC= 1.00D-01 BMatC= 1.45D-05 BMatP= 6.35D-05
 IDIUse=1 WtCom= 1.00D+00 WtEn= 0.00D+00
 Coeff-Com:  0.153D-02-0.385D-01-0.434D-02 0.372D+00 0.669D+00
 Coeff:      0.153D-02-0.385D-01-0.434D-02 0.372D+00 0.669D+00
 Gap=     0.276 Goal=   None    Shift=    0.000
 Gap=     0.147 Goal=   None    Shift=    0.000
 RMSDP=3.91D-05 MaxDP=1.79D-03 DE=-2.13D-05 OVMax= 1.42D-03

 Cycle   6  Pass 1  IDiag  1:
 RMSU=  2.87D-05    CP:  1.09D+00  1.10D+00  9.73D-01  1.05D+00  8.34D-01
 E= -732.219217591376     Delta-E=       -0.000005570139 Rises=F Damp=F
 DIIS: error= 6.01D-05 at cycle   6 NSaved=   6.
 NSaved= 6 IEnMin= 6 EnMin= -732.219217591376     IErMin= 6 ErrMin= 6.01D-05
 ErrMax= 6.01D-05  0.00D+00 EMaxC= 1.00D-01 BMatC= 1.90D-06 BMatP= 1.45D-05
 IDIUse=1 WtCom= 1.00D+00 WtEn= 0.00D+00
 Coeff-Com:  0.101D-02-0.138D-01-0.141D-01 0.465D-01 0.183D+00 0.798D+00
 Coeff:      0.101D-02-0.138D-01-0.141D-01 0.465D-01 0.183D+00 0.798D+00
 Gap=     0.276 Goal=   None    Shift=    0.000
 Gap=     0.147 Goal=   None    Shift=    0.000
 RMSDP=2.18D-05 MaxDP=1.80D-03 DE=-5.57D-06 OVMax= 1.45D-03

 Cycle   7  Pass 1  IDiag  1:
 RMSU=  1.52D-05    CP:  1.09D+00  1.10D+00  9.72D-01  1.04D+00  8.93D-01
                    CP:  1.42D+00
 E= -732.219220244356     Delta-E=       -0.000002652980 Rises=F Damp=F
 DIIS: error= 5.44D-05 at cycle   7 NSaved=   7.
 NSaved= 7 IEnMin= 7 EnMin= -732.219220244356     IErMin= 7 ErrMin= 5.44D-05
 ErrMax= 5.44D-05  0.00D+00 EMaxC= 1.00D-01 BMatC= 1.18D-06 BMatP= 1.90D-06
 IDIUse=1 WtCom= 1.00D+00 WtEn= 0.00D+00
 Coeff-Com: -0.549D-04 0.500D-02-0.636D-02-0.707D-01-0.118D+00 0.275D+00
 Coeff-Com:  0.915D+00
 Coeff:     -0.549D-04 0.500D-02-0.636D-02-0.707D-01-0.118D+00 0.275D+00
 Coeff:      0.915D+00
 Gap=     0.276 Goal=   None    Shift=    0.000
 Gap=     0.147 Goal=   None    Shift=    0.000
 RMSDP=1.97D-05 MaxDP=2.28D-03 DE=-2.65D-06 OVMax= 1.80D-03

 Cycle   8  Pass 1  IDiag  1:
 RMSU=  1.06D-05    CP:  1.09D+00  1.10D+00  9.69D-01  1.04D+00  9.22D-01
                    CP:  1.76D+00  1.61D+00
 E= -732.219223061639     Delta-E=       -0.000002817283 Rises=F Damp=F
 DIIS: error= 4.84D-05 at cycle   8 NSaved=   8.
 NSaved= 8 IEnMin= 8 EnMin= -732.219223061639     IErMin= 8 ErrMin= 4.84D-05
 ErrMax= 4.84D-05  0.00D+00 EMaxC= 1.00D-01 BMatC= 8.69D-07 BMatP= 1.18D-06
 IDIUse=1 WtCom= 1.00D+00 WtEn= 0.00D+00
 Coeff-Com: -0.327D-03 0.591D-02 0.302D-03-0.284D-01-0.924D-01-0.196D+00
 Coeff-Com:  0.299D+00 0.101D+01
 Coeff:     -0.327D-03 0.591D-02 0.302D-03-0.284D-01-0.924D-01-0.196D+00
 Coeff:      0.299D+00 0.101D+01
 Gap=     0.276 Goal=   None    Shift=    0.000
 Gap=     0.147 Goal=   None    Shift=    0.000
 RMSDP=2.19D-05 MaxDP=2.74D-03 DE=-2.82D-06 OVMax= 1.97D-03

 Cycle   9  Pass 1  IDiag  1:
 RMSU=  5.15D-06    CP:  1.09D+00  1.10D+00  9.66D-01  1.04D+00  9.46D-01
                    CP:  2.07D+00  2.31D+00  2.03D+00
 E= -732.219226003975     Delta-E=       -0.000002942335 Rises=F Damp=F
 DIIS: error= 4.02D-05 at cycle   9 NSaved=   9.
 NSaved= 9 IEnMin= 9 EnMin= -732.219226003975     IErMin= 9 ErrMin= 4.02D-05
 ErrMax= 4.02D-05  0.00D+00 EMaxC= 1.00D-01 BMatC= 7.61D-07 BMatP= 8.69D-07
 IDIUse=1 WtCom= 1.00D+00 WtEn= 0.00D+00
 Coeff-Com: -0.164D-03 0.623D-03 0.184D-02 0.266D-01 0.227D-01-0.281D+00
 Coeff-Com: -0.330D+00 0.472D+00 0.109D+01
 Coeff:     -0.164D-03 0.623D-03 0.184D-02 0.266D-01 0.227D-01-0.281D+00
 Coeff:     -0.330D+00 0.472D+00 0.109D+01
 Gap=     0.276 Goal=   None    Shift=    0.000
 Gap=     0.147 Goal=   None    Shift=    0.000
 RMSDP=2.63D-05 MaxDP=3.28D-03 DE=-2.94D-06 OVMax= 2.38D-03

 Cycle  10  Pass 1  IDiag  1:
 RMSU=  5.78D-06    CP:  1.09D+00  1.10D+00  9.62D-01  1.04D+00  9.66D-01
                    CP:  2.39D+00  3.00D+00  3.00D+00  2.42D+00
 E= -732.219229588174     Delta-E=       -0.000003584199 Rises=F Damp=F
 DIIS: error= 3.08D-05 at cycle  10 NSaved=  10.
 NSaved=10 IEnMin=10 EnMin= -732.219229588174     IErMin=10 ErrMin= 3.08D-05
 ErrMax= 3.08D-05  0.00D+00 EMaxC= 1.00D-01 BMatC= 6.58D-07 BMatP= 7.61D-07
 IDIUse=1 WtCom= 1.00D+00 WtEn= 0.00D+00
 Coeff-Com:  0.204D-03-0.423D-02-0.182D-02 0.281D-01 0.778D-01 0.361D-01
 Coeff-Com: -0.232D+00-0.562D+00-0.976D-01 0.176D+01
 Coeff:      0.204D-03-0.423D-02-0.182D-02 0.281D-01 0.778D-01 0.361D-01
 Coeff:     -0.232D+00-0.562D+00-0.976D-01 0.176D+01
 Gap=     0.276 Goal=   None    Shift=    0.000
 Gap=     0.147 Goal=   None    Shift=    0.000
 RMSDP=3.88D-05 MaxDP=4.11D-03 DE=-3.58D-06 OVMax= 3.53D-03

 Cycle  11  Pass 1  IDiag  1:
 RMSU=  2.31D-05    CP:  1.09D+00  1.10D+00  9.59D-01  1.04D+00  1.01D+00
                    CP:  2.80D+00  3.00D+00  3.00D+00  3.00D+00  3.00D+00
 E= -732.219235021553     Delta-E=       -0.000005433380 Rises=F Damp=F
 DIIS: error= 2.60D-05 at cycle  11 NSaved=  11.
 NSaved=11 IEnMin=11 EnMin= -732.219235021553     IErMin=11 ErrMin= 2.60D-05
 ErrMax= 2.60D-05  0.00D+00 EMaxC= 1.00D-01 BMatC= 6.01D-07 BMatP= 6.58D-07
 IDIUse=1 WtCom= 1.00D+00 WtEn= 0.00D+00
 Coeff-Com:  0.136D-03-0.118D-02-0.249D-02-0.770D-02 0.607D-02 0.131D+00
 Coeff-Com:  0.165D+00-0.279D+00-0.873D+00 0.563D+00 0.130D+01
 Coeff:      0.136D-03-0.118D-02-0.249D-02-0.770D-02 0.607D-02 0.131D+00
 Coeff:      0.165D+00-0.279D+00-0.873D+00 0.563D+00 0.130D+01
 Gap=     0.276 Goal=   None    Shift=    0.000
 Gap=     0.147 Goal=   None    Shift=    0.000
 RMSDP=3.31D-05 MaxDP=3.16D-03 DE=-5.43D-06 OVMax= 2.85D-03

 Cycle  12  Pass 1  IDiag  1:
 RMSU=  9.90D-06    CP:  1.09D+00  1.10D+00  9.57D-01  1.04D+00  1.05D+00
                    CP:  3.00D+00  3.00D+00  3.00D+00  3.00D+00  3.00D+00
                    CP:  2.18D+00
 E= -732.219239731355     Delta-E=       -0.000004709801 Rises=F Damp=F
 DIIS: error= 2.64D-05 at cycle  12 NSaved=  12.
 NSaved=12 IEnMin=12 EnMin= -732.219239731355     IErMin=11 ErrMin= 2.60D-05
 ErrMax= 2.64D-05  0.00D+00 EMaxC= 1.00D-01 BMatC= 5.66D-07 BMatP= 6.01D-07
 IDIUse=1 WtCom= 1.00D+00 WtEn= 0.00D+00
 Coeff-Com: -0.115D-03 0.298D-02-0.192D-03-0.240D-01-0.572D-01 0.922D-02
 Coeff-Com:  0.272D+00 0.370D+00-0.478D+00-0.975D+00 0.539D+00 0.134D+01
 Coeff:     -0.115D-03 0.298D-02-0.192D-03-0.240D-01-0.572D-01 0.922D-02
 Coeff:      0.272D+00 0.370D+00-0.478D+00-0.975D+00 0.539D+00 0.134D+01
 Gap=     0.276 Goal=   None    Shift=    0.000
 Gap=     0.147 Goal=   None    Shift=    0.000
 RMSDP=3.69D-05 MaxDP=3.02D-03 DE=-4.71D-06 OVMax= 3.55D-03

 Cycle  13  Pass 1  IDiag  1:
 RMSU=  1.29D-05    CP:  1.09D+00  1.11D+00  9.56D-01  1.03D+00  1.09D+00
                    CP:  3.00D+00  3.00D+00  3.00D+00  3.00D+00  3.00D+00
                    CP:  3.00D+00  2.48D+00
 E= -732.219245057715     Delta-E=       -0.000005326361 Rises=F Damp=F
 DIIS: error= 2.61D-05 at cycle  13 NSaved=  13.
 NSaved=13 IEnMin=13 EnMin= -732.219245057715     IErMin=11 ErrMin= 2.60D-05
 ErrMax= 2.61D-05  0.00D+00 EMaxC= 1.00D-01 BMatC= 5.37D-07 BMatP= 5.66D-07
 IDIUse=1 WtCom= 1.00D+00 WtEn= 0.00D+00
 Coeff-Com: -0.680D-04 0.110D-02 0.451D-03-0.303D-02-0.147D-01-0.408D-01
 Coeff-Com:  0.214D-01 0.202D+00 0.150D+00-0.383D+00-0.367D+00 0.354D+00
 Coeff-Com:  0.108D+01
 Coeff:     -0.680D-04 0.110D-02 0.451D-03-0.303D-02-0.147D-01-0.408D-01
 Coeff:      0.214D-01 0.202D+00 0.150D+00-0.383D+00-0.367D+00 0.354D+00
 Coeff:      0.108D+01
 Gap=     0.276 Goal=   None    Shift=    0.000
 Gap=     0.147 Goal=   None    Shift=    0.000
 RMSDP=1.79D-05 MaxDP=1.22D-03 DE=-5.33D-06 OVMax= 2.05D-03

 Cycle  14  Pass 1  IDiag  1:
 RMSU=  5.94D-06    CP:  1.09D+00  1.11D+00  9.56D-01  1.03D+00  1.12D+00
                    CP:  3.00D+00  3.00D+00  3.00D+00  3.00D+00  3.00D+00
                    CP:  3.00D+00  3.00D+00  2.07D+00
 E= -732.219247922779     Delta-E=       -0.000002865064 Rises=F Damp=F
 DIIS: error= 2.57D-05 at cycle  14 NSaved=  14.
 NSaved=14 IEnMin=14 EnMin= -732.219247922779     IErMin=14 ErrMin= 2.57D-05
 ErrMax= 2.57D-05  0.00D+00 EMaxC= 1.00D-01 BMatC= 5.31D-07 BMatP= 5.37D-07
 IDIUse=1 WtCom= 1.00D+00 WtEn= 0.00D+00
 Coeff-Com:  0.269D-04-0.917D-03 0.245D-03 0.849D-02 0.190D-01-0.161D-01
 Coeff-Com: -0.108D+00-0.994D-01 0.231D+00 0.328D+00-0.378D+00-0.482D+00
 Coeff-Com:  0.407D+00 0.109D+01
 Coeff:      0.269D-04-0.917D-03 0.245D-03 0.849D-02 0.190D-01-0.161D-01
 Coeff:     -0.108D+00-0.994D-01 0.231D+00 0.328D+00-0.378D+00-0.482D+00
 Coeff:      0.407D+00 0.109D+01
 Gap=     0.276 Goal=   None    Shift=    0.000
 Gap=     0.147 Goal=   None    Shift=    0.000
 RMSDP=1.85D-05 MaxDP=1.26D-03 DE=-2.87D-06 OVMax= 2.16D-03

 Cycle  15  Pass 1  IDiag  1:
 RMSU=  4.95D-06    CP:  1.09D+00  1.11D+00  9.57D-01  1.03D+00  1.14D+00
                    CP:  3.00D+00  3.00D+00  3.00D+00  3.00D+00  3.00D+00
                    CP:  3.00D+00  3.00D+00  3.00D+00  2.55D+00
 E= -732.219250906792     Delta-E=       -0.000002984013 Rises=F Damp=F
 DIIS: error= 2.51D-05 at cycle  15 NSaved=  15.
 NSaved=15 IEnMin=15 EnMin= -732.219250906792     IErMin=15 ErrMin= 2.51D-05
 ErrMax= 2.51D-05  0.00D+00 EMaxC= 1.00D-01 BMatC= 5.28D-07 BMatP= 5.31D-07
 IDIUse=1 WtCom= 1.00D+00 WtEn= 0.00D+00
 Coeff-Com:  0.231D-04-0.387D-03 0.156D-04 0.110D-02 0.552D-02 0.155D-01
 Coeff-Com: -0.520D-02-0.567D-01-0.338D-01 0.978D-01 0.612D-01-0.715D-01
 Coeff-Com: -0.249D+00 0.716D-01 0.116D+01
 Coeff:      0.231D-04-0.387D-03 0.156D-04 0.110D-02 0.552D-02 0.155D-01
 Coeff:     -0.520D-02-0.567D-01-0.338D-01 0.978D-01 0.612D-01-0.715D-01
 Coeff:     -0.249D+00 0.716D-01 0.116D+01
 Gap=     0.276 Goal=   None    Shift=    0.000
 Gap=     0.147 Goal=   None    Shift=    0.000
 RMSDP=1.27D-05 MaxDP=8.68D-04 DE=-2.98D-06 OVMax= 1.56D-03

 Cycle  16  Pass 1  IDiag  1:
 RMSU=  8.13D-06    CP:  1.09D+00  1.11D+00  9.58D-01  1.02D+00  1.16D+00
                    CP:  3.00D+00  3.00D+00  3.00D+00  3.00D+00  3.00D+00
                    CP:  3.00D+00  3.00D+00  3.00D+00  3.00D+00  2.38D+00
 E= -732.219253046459     Delta-E=       -0.000002139667 Rises=F Damp=F
 DIIS: error= 2.48D-05 at cycle  16 NSaved=  16.
 NSaved=16 IEnMin=16 EnMin= -732.219253046459     IErMin=16 ErrMin= 2.48D-05
 ErrMax= 2.48D-05  0.00D+00 EMaxC= 1.00D-01 BMatC= 5.28D-07 BMatP= 5.28D-07
 IDIUse=1 WtCom= 1.00D+00 WtEn= 0.00D+00
 Coeff-Com:  0.594D-05-0.892D-05 0.317D-04-0.136D-02-0.133D-02 0.121D-01
 Coeff-Com:  0.203D-01-0.948D-02-0.597D-01-0.283D-01 0.104D+00 0.794D-01
 Coeff-Com: -0.226D+00-0.136D+00 0.541D+00 0.707D+00
 Coeff:      0.594D-05-0.892D-05 0.317D-04-0.136D-02-0.133D-02 0.121D-01
 Coeff:      0.203D-01-0.948D-02-0.597D-01-0.283D-01 0.104D+00 0.794D-01
 Coeff:     -0.226D+00-0.136D+00 0.541D+00 0.707D+00
 Gap=     0.276 Goal=   None    Shift=    0.000
 Gap=     0.147 Goal=   None    Shift=    0.000
 RMSDP=7.64D-06 MaxDP=5.19D-04 DE=-2.14D-06 OVMax= 9.44D-04

 Error on total polarization charges =  0.04588
 SCF Done:  E(UM062X) =  -732.219253046     A.U. after   16 cycles
            NFock= 16  Conv=0.76D-05     -V/T= 2.0641
 <Sx>= 0.0000 <Sy>= 0.0000 <Sz>= 1.5000 <S**2>= 4.7490 S= 1.7358
 <L.S>=  0.00000000000    
 KE= 6.880818367628D+02 PE=-3.325278301872D+03 EE= 1.072198649440D+03
 SMD-CDS (non-electrostatic) energy       (kcal/mol) =       6.70
 (included in total energy above)
 Annihilation of the first spin contaminant:
 S**2 before annihilation     4.7490,   after     3.7852
 Leave Link  502 at Wed May 31 23:05:25 2023, MaxMem=  2684354560 cpu:             829.8 elap:              83.3
 (Enter /home/xut/apps/g16/l701.exe)
 ... and contract with generalized density number  0.
 Compute integral first derivatives.
   1 Symmetry operations used in ECPInt.
 ECPInt:  NShTT=    6105 NPrTT=   23469 LenC2=    5802 LenP2D=   15780.
 LDataN:  DoStor=T MaxTD1= 5 Len=  102
 D1PCM: PCM CHGder 1st derivatives, ID1Alg=3 FixD1E=F DoIter=F DoCFld=F I1PDM=0.
 GePol: Maximum number of non-zero 1st derivatives   =     185
 Leave Link  701 at Wed May 31 23:05:26 2023, MaxMem=  2684354560 cpu:              10.1 elap:               1.0
 (Enter /home/xut/apps/g16/l702.exe)
 L702 exits ... SP integral derivatives will be done elsewhere.
 Leave Link  702 at Wed May 31 23:05:26 2023, MaxMem=  2684354560 cpu:               0.2 elap:               0.0
 (Enter /home/xut/apps/g16/l703.exe)
 Integral derivatives from FoFJK, PRISM(SPDF).
 Compute integral first derivatives, UseDBF=F ICtDFT=           0.
 Calling FoFJK, ICntrl=      2127 FMM=F ISym2X=0 I1Cent= 0 IOpClX= 1 NMat=1 NMatS=1 NMatT=0.
 FoFJK:  IHMeth= 1 ICntrl=    2127 DoSepK=F KAlg= 0 I1Cent=           0 FoldK=F
 IRaf=         0 NMat=       1 IRICut=       1 DoRegI=T DoRafI=F ISym2E= 0 IDoP0=0 IntGTp=1.
 FoFCou: FMM=F IPFlag=           0 FMFlag=      100000 FMFlg1=         800
         NFxFlg=           0 DoJE=F BraDBF=F KetDBF=F FulRan=T
         wScrn=  0.000000 ICntrl=      2127 IOpCl=  1 I1Cent=           0 NGrid=           0
         NMat0=    1 NMatS0=      1 NMatT0=    0 NMatD0=    1 NMtDS0=    0 NMtDT0=    0
 Symmetry not used in FoFCou.
 Leave Link  703 at Wed May 31 23:05:38 2023, MaxMem=  2684354560 cpu:             117.2 elap:              11.8
 (Enter /home/xut/apps/g16/l716.exe)
 Dipole        = 1.57838615D+01-1.07591015D+00 3.53329228D-02
 ***** Axes restored to original set *****
 -------------------------------------------------------------------
 Center     Atomic                   Forces (Hartrees/Bohr)
 Number     Number              X              Y              Z
 -------------------------------------------------------------------
      1        6           0.000199359   -0.013933248    0.001863249
      2        6           0.008557000    0.003865948   -0.000338552
      3        6           0.003992373   -0.004867732   -0.000427904
      4        6          -0.019373516   -0.000804682    0.000204358
      5        6          -0.000612803    0.002497878   -0.000873023
      6        6          -0.003698356    0.006983282   -0.003298966
      7        1           0.001681986   -0.002070776    0.000166590
      8        1          -0.003002515    0.002291639   -0.000178230
      9        6           0.006061390   -0.003449769    0.001162686
     10        8          -0.000530393   -0.010763555   -0.000440026
     11        1          -0.001383911   -0.000055451   -0.000406563
     12        8          -0.011912669    0.014105132    0.000039154
     13        8           0.014748603   -0.000622601    0.000430993
     14        1          -0.001955507   -0.004798140    0.000818793
     15        8           0.001084139    0.007757296    0.003717277
     16        1           0.001029264   -0.001613482   -0.002587080
     17        8          -0.005271308    0.004178357   -0.000469352
     18        1           0.003577631    0.001645822    0.000010691
     19       24           0.006809233   -0.000345918    0.000605906
 -------------------------------------------------------------------
 Cartesian Forces:  Max     0.019373516 RMS     0.005544323
 Leave Link  716 at Wed May 31 23:05:38 2023, MaxMem=  2684354560 cpu:               0.2 elap:               0.0
 (Enter /home/xut/apps/g16/l103.exe)

 GradGradGradGradGradGradGradGradGradGradGradGradGradGradGradGradGradGrad
 Berny optimization.
 Using GEDIIS/GDIIS optimizer.
 FormGI is forming the generalized inverse of G from B-inverse, IUseBI=4.
 Internal  Forces:  Max     0.020900397 RMS     0.004920141
 Search for a local minimum.
 Step number   3 out of a maximum of   94
 All quantities printed in internal units (Hartrees-Bohrs-Radians)
 RMS Force = .49201D-02 SwitMx=.10000D-02 MixMth= 1
 Mixed Optimization -- RFO/linear search
 Update second derivatives using D2CorX and points    1    2    3
 DE= -3.40D-03 DEPred=-5.37D-03 R= 6.33D-01
 TightC=F SS=  1.41D+00  RLast= 3.07D-01 DXNew= 8.4853D-01 9.2250D-01
 Trust test= 6.33D-01 RLast= 3.07D-01 DXMaxT set to 8.49D-01
 ITU=  1  1  0
 Use linear search instead of GDIIS.
     Eigenvalues ---    0.00236   0.01098   0.01153   0.01275   0.01346
     Eigenvalues ---    0.01676   0.01757   0.01765   0.01973   0.02021
     Eigenvalues ---    0.02284   0.02386   0.02438   0.02990   0.02997
     Eigenvalues ---    0.03001   0.07653   0.15433   0.15998   0.15999
     Eigenvalues ---    0.16000   0.16055   0.16406   0.22254   0.23039
     Eigenvalues ---    0.23466   0.23931   0.24996   0.24998   0.25000
     Eigenvalues ---    0.25000   0.25850   0.28564   0.34196   0.36247
     Eigenvalues ---    0.37141   0.37721   0.39406   0.42515   0.43639
     Eigenvalues ---    0.47581   0.50980   0.53924   0.55198   0.55473
     Eigenvalues ---    0.55476   0.55981   0.65261   0.66847   0.68311
     Eigenvalues ---    0.84942
 RFO step:  Lambda=-3.55885879D-03 EMin= 2.36343589D-03
 Quartic linear search produced a step of -0.29461.
 Iteration  1 RMS(Cart)=  0.07903251 RMS(Int)=  0.00437309
 Iteration  2 RMS(Cart)=  0.00518273 RMS(Int)=  0.00045160
 Iteration  3 RMS(Cart)=  0.00001671 RMS(Int)=  0.00045140
 Iteration  4 RMS(Cart)=  0.00000001 RMS(Int)=  0.00045140
 ITry= 1 IFail=0 DXMaxC= 3.84D-01 DCOld= 1.00D+10 DXMaxT= 8.49D-01 DXLimC= 3.00D+00 Rises=F
 Variable       Old X    -DE/DX   Delta X   Delta X   Delta X     New X
                                 (Linear)    (Quad)   (Total)
    R1        2.70752  -0.00489  -0.00576  -0.00095  -0.00669   2.70083
    R2        2.62353  -0.00735  -0.00636  -0.00153  -0.00787   2.61566
    R3        2.49545   0.00472  -0.00593   0.01147   0.00554   2.50099
    R4        2.65126   0.00230  -0.00054   0.00340   0.00286   2.65412
    R5        2.05606  -0.00267  -0.00347  -0.00025  -0.00372   2.05234
    R6        2.59628  -0.00425  -0.00500   0.00121  -0.00382   2.59246
    R7        2.82205   0.00784   0.01041   0.00425   0.01466   2.83671
    R8        2.68265   0.02090   0.02619   0.01330   0.03947   2.72212
    R9        2.05348  -0.00148  -0.00495   0.00351  -0.00144   2.05204
   R10        2.63508   0.00849   0.00447   0.00725   0.01172   2.64680
   R11        2.44828   0.01177  -0.00108   0.01251   0.01143   2.45971
   R12        2.54698   0.00960   0.02246  -0.01228   0.01017   2.55716
   R13        2.49204   0.01041  -0.00733   0.01850   0.01118   2.50322
   R14        2.26249   0.01849   0.01365  -0.00101   0.01263   2.27513
   R15        1.82957  -0.00100  -0.00164   0.00082  -0.00083   1.82875
   R16        1.84530  -0.00307  -0.00631   0.00377  -0.00254   1.84277
   R17        1.84314  -0.00226  -0.00340   0.00145  -0.00195   1.84119
   R18        4.35710   0.00635  -0.01434   0.07345   0.05911   4.41621
   R19        1.83787  -0.00155  -0.00316   0.00195  -0.00120   1.83666
    A1        2.08662   0.00539   0.00424   0.00624   0.01049   2.09712
    A2        2.15285  -0.00377  -0.00994   0.00417  -0.00583   2.14701
    A3        2.04357  -0.00163   0.00574  -0.01082  -0.00516   2.03841
    A4        2.10431   0.00464  -0.00007   0.01075   0.01073   2.11504
    A5        2.07091  -0.00246   0.00235  -0.00925  -0.00692   2.06399
    A6        2.10785  -0.00218  -0.00227  -0.00148  -0.00377   2.10409
    A7        2.08227  -0.00283   0.00413  -0.01321  -0.00908   2.07319
    A8        2.01137   0.00418   0.00861  -0.00036   0.00824   2.01961
    A9        2.18954  -0.00135  -0.01273   0.01358   0.00085   2.19039
   A10        2.09932  -0.00123  -0.00325   0.00242  -0.00091   2.09841
   A11        2.19195  -0.00307  -0.01219   0.00375  -0.00847   2.18349
   A12        1.99181   0.00429   0.01547  -0.00644   0.00900   2.00081
   A13        2.11216  -0.00216  -0.00809   0.00679  -0.00131   2.11085
   A14        1.99872   0.00601   0.00519   0.00707   0.01225   2.01096
   A15        2.17229  -0.00385   0.00290  -0.01382  -0.01093   2.16136
   A16        2.08123  -0.00382   0.00314  -0.01356  -0.01052   2.07071
   A17        2.12518  -0.00682  -0.02132   0.00931  -0.01217   2.11301
   A18        2.07663   0.01066   0.01820   0.00472   0.02276   2.09939
   A19        2.10020  -0.00438   0.00447  -0.01679  -0.01231   2.08789
   A20        2.09465   0.00409  -0.00400   0.01550   0.01150   2.10615
   A21        2.08833   0.00029  -0.00047   0.00128   0.00081   2.08914
   A22        1.99636   0.00202   0.01716  -0.01626   0.00090   1.99725
   A23        1.93828   0.00800   0.02651  -0.00570   0.02081   1.95909
   A24        1.90565  -0.00126  -0.00924   0.01582   0.00424   1.90989
   A25        2.58388   0.00597   0.00967   0.00910   0.01644   2.60032
   A26        1.78261  -0.00447  -0.00526  -0.00235  -0.00994   1.77267
   A27        1.92651   0.00690   0.02392  -0.00665   0.01727   1.94378
    D1       -0.01727  -0.00005   0.00365  -0.01320  -0.00974  -0.02700
    D2        3.13987  -0.00039   0.00147  -0.01483  -0.01341   3.12646
    D3       -3.14023   0.00026  -0.00219   0.01390   0.01145  -3.12879
    D4        0.01690  -0.00008  -0.00437   0.01227   0.00777   0.02467
    D5       -0.00583   0.00008  -0.00062   0.00374   0.00311  -0.00272
    D6        3.11716   0.00138   0.00083   0.03348   0.03401  -3.13201
    D7        3.11828  -0.00024   0.00486  -0.02154  -0.01680   3.10148
    D8       -0.04191   0.00106   0.00631   0.00820   0.01409  -0.02781
    D9        0.00565  -0.00001  -0.00047  -0.00191  -0.00226   0.00340
   D10       -3.11774   0.00022  -0.00618   0.02440   0.01810  -3.09964
   D11        0.01840  -0.00020  -0.00269   0.00367   0.00096   0.01936
   D12       -3.11988  -0.00047  -0.00340  -0.00021  -0.00356  -3.12344
   D13       -3.13906   0.00014  -0.00045   0.00527   0.00469  -3.13437
   D14        0.00584  -0.00012  -0.00115   0.00139   0.00018   0.00602
   D15        0.00323   0.00030  -0.00124   0.01472   0.01350   0.01673
   D16        3.12895  -0.00006   0.00196  -0.00771  -0.00562   3.12333
   D17        3.14115   0.00060  -0.00044   0.01899   0.01850  -3.12353
   D18       -0.01632   0.00024   0.00275  -0.00343  -0.00061  -0.01693
   D19        3.09972  -0.00031   0.00930  -0.14230  -0.13302   2.96671
   D20       -0.04453  -0.00007   0.01206  -0.14534  -0.13328  -0.17781
   D21       -0.03833  -0.00059   0.00853  -0.14639  -0.13785  -0.17619
   D22        3.10060  -0.00035   0.01130  -0.14943  -0.13812   2.96248
   D23       -0.02671  -0.00012   0.00443  -0.02450  -0.02010  -0.04681
   D24        3.12073  -0.00067   0.00187  -0.03225  -0.03058   3.09015
   D25        3.12903   0.00025   0.00165  -0.00460  -0.00275   3.12628
   D26       -0.00672  -0.00029  -0.00090  -0.01235  -0.01323  -0.01995
   D27        0.02763  -0.00010  -0.00342   0.01466   0.01119   0.03882
   D28       -3.09589  -0.00118  -0.00451  -0.01431  -0.01909  -3.11497
   D29       -3.12042   0.00054  -0.00060   0.02329   0.02269  -3.09772
   D30        0.03925  -0.00054  -0.00169  -0.00568  -0.00758   0.03167
   D31       -3.12217   0.00087  -0.00005   0.01915   0.01913  -3.10303
   D32        0.02550   0.00029  -0.00272   0.01102   0.00827   0.03377
   D33        0.40077  -0.00235   0.03008  -0.22017  -0.19023   0.21054
   D34       -2.94901  -0.00116  -0.00780  -0.00928  -0.01718  -2.96620
   D35       -2.75938  -0.00120   0.03140  -0.19069  -0.15918  -2.91856
   D36        0.17403  -0.00001  -0.00648   0.02020   0.01387   0.18789
   D37       -0.01232  -0.00019   0.00369  -0.01403  -0.01034  -0.02266
   D38        3.13192  -0.00044   0.00093  -0.01102  -0.01009   3.12183
         Item               Value     Threshold  Converged?
 Maximum Force            0.020900     0.000450     NO 
 RMS     Force            0.004920     0.000300     NO 
 Maximum Displacement     0.383550     0.001800     NO 
 RMS     Displacement     0.079229     0.001200     NO 
 Predicted change in Energy=-2.181265D-03
 Lowest energy point so far.  Saving SCF results.
 GradGradGradGradGradGradGradGradGradGradGradGradGradGradGradGradGradGrad

 Leave Link  103 at Wed May 31 23:05:38 2023, MaxMem=  2684354560 cpu:               0.2 elap:               0.0
 (Enter /home/xut/apps/g16/l202.exe)
                          Input orientation:                          
 ---------------------------------------------------------------------
 Center     Atomic      Atomic             Coordinates (Angstroms)
 Number     Number       Type             X           Y           Z
 ---------------------------------------------------------------------
      1          6           0       -0.252207    1.418538    0.004975
      2          6           0       -1.661675    1.181942    0.014404
      3          6           0       -2.179866   -0.123392    0.028747
      4          6           0       -1.306166   -1.180695    0.056926
      5          6           0        0.114733   -0.946622    0.092181
      6          6           0        0.631798    0.354107    0.042201
      7          1           0       -2.327212    2.040037   -0.001151
      8          1           0       -1.593376   -2.227503    0.086299
      9          6           0       -3.677116   -0.230003    0.012919
     10          8           0       -4.247604   -1.410537   -0.175689
     11          1           0       -3.625061   -2.138601   -0.313038
     12          8           0       -4.364057    0.745713    0.172836
     13          8           0        0.851117   -2.016521    0.177475
     14          1           0        1.801854   -1.806899    0.232951
     15          8           0        1.969648    0.557252    0.045124
     16          1           0        2.154012    1.499525    0.210715
     17          8           0        0.275247    2.632357    0.005615
     18          1           0       -0.413660    3.317866    0.016265
     19         24           0        4.129066   -0.319888   -0.124878
 ---------------------------------------------------------------------
                    Distance matrix (angstroms):
                    1          2          3          4          5
     1  C    0.000000
     2  C    1.429219   0.000000
     3  C    2.468599   1.404502   0.000000
     4  C    2.805270   2.389613   1.371873   0.000000
     5  C    2.395044   2.773529   2.438630   1.440481   0.000000
     6  C    1.384147   2.438463   2.851954   2.472152   1.400625
     7  H    2.166089   1.086051   2.168647   3.379204   3.859007
     8  H    3.885739   3.410887   2.185078   1.085891   2.135024
     9  C    3.801020   2.460812   1.501124   2.554830   3.859786
    10  O    4.898928   3.666621   2.444192   2.959560   4.395105
    11  H    4.912282   3.871448   2.503292   2.536086   3.946020
    12  O    4.169913   2.741945   2.355163   3.615962   4.788534
    13  O    3.612024   4.070735   3.576719   2.316681   1.301623
    14  H    3.830742   4.580062   4.327815   3.175359   1.899018
    15  O    2.383289   3.684791   4.204998   3.708309   2.388422
    16  H    2.416357   3.833910   4.631358   4.379505   3.186902
    17  O    1.323467   2.419803   3.690836   4.128300   3.583623
    18  H    1.906211   2.473806   3.868062   4.586422   4.297770
    19  Cr   4.715352   5.983944   6.313861   5.505978   4.068757
                    6          7          8          9         10
     6  C    0.000000
     7  H    3.405874   0.000000
     8  H    3.408527   4.331058   0.000000
     9  C    4.348423   2.641121   2.887449   0.000000
    10  O    5.193265   3.952826   2.789443   1.324647   0.000000
    11  H    4.945770   4.386651   2.072466   1.936932   0.967730
    12  O    5.012882   2.419563   4.064994   1.203944   2.187338
    13  O    2.384592   5.156486   2.455275   4.870690   5.146736
    14  H    2.464826   5.648265   3.424325   5.705622   6.076185
    15  O    1.353188   4.545745   4.522355   5.701469   6.524965
    16  H    1.912463   4.518673   5.286694   6.085429   7.042617
    17  O    2.306271   2.669022   5.207351   4.879993   6.069106
    18  H    3.142852   2.301050   5.669899   4.820532   6.090465
    19  Cr   3.565540   6.875179   6.035722   7.807916   8.447526
                   11         12         13         14         15
    11  H    0.000000
    12  O    3.016862   0.000000
    13  O    4.504628   5.901525   0.000000
    14  H    5.464387   6.673672   0.975151   0.000000
    15  O    6.220665   6.337795   2.809437   2.377529   0.000000
    16  H    6.848939   6.561623   3.749830   3.325199   0.974315
    17  O    6.170574   5.011041   4.687561   4.699915   2.679294
    18  H    6.339919   4.716579   5.484646   5.587367   3.647188
    19  Cr   7.966782   8.564887   3.703368   2.784809   2.336956
                   16         17         18         19
    16  H    0.000000
    17  O    2.203436   0.000000
    18  H    3.152319   0.971921   0.000000
    19  Cr   2.706239   4.856408   5.821473   0.000000
 Stoichiometry    C7H6CrO5(3+,4)
 Framework group  C1[X(C7H6CrO5)]
 Deg. of freedom    51
 Full point group                 C1      NOp   1
 RotChk:  IX=2 Diff= 1.32D-02
 Largest Abelian subgroup         C1      NOp   1
 Largest concise Abelian subgroup C1      NOp   1
                         Standard orientation:                         
 ---------------------------------------------------------------------
 Center     Atomic      Atomic             Coordinates (Angstroms)
 Number     Number       Type             X           Y           Z
 ---------------------------------------------------------------------
      1          6           0       -0.263146    1.418842   -0.011596
      2          6           0       -1.672274    1.180081   -0.015663
      3          6           0       -2.188611   -0.125957    0.001330
      4          6           0       -1.313659   -1.181680    0.045397
      5          6           0        0.106429   -0.945146    0.094282
      6          6           0        0.622025    0.356063    0.041671
      7          1           0       -2.338907    2.037009   -0.043650
      8          1           0       -1.599579   -2.228738    0.078258
      9          6           0       -3.685444   -0.235031   -0.029737
     10          8           0       -4.252105   -1.417618   -0.217014
     11          1           0       -3.627035   -2.145539   -0.343189
     12          8           0       -4.375524    0.740575    0.116773
     13          8           0        0.843484   -2.013327    0.194079
     14          1           0        1.793258   -1.801859    0.258342
     15          8           0        1.959459    0.561338    0.057538
     16          1           0        2.140624    1.504915    0.219187
     17          8           0        0.262432    2.633474   -0.012937
     18          1           0       -0.427587    3.317946   -0.013891
     19         24           0        4.121889   -0.313430   -0.084028
 ---------------------------------------------------------------------
 Rotational constants (GHZ):           1.5299022           0.2713974           0.2310121
 Leave Link  202 at Wed May 31 23:05:38 2023, MaxMem=  2684354560 cpu:               0.1 elap:               0.0
 (Enter /home/xut/apps/g16/l301.exe)
 Basis read from rwf:  (5D, 7F)
 Pseudo-potential data read from rwf file.
 There are   342 symmetry adapted cartesian basis functions of A   symmetry.
 There are   328 symmetry adapted basis functions of A   symmetry.
   328 basis functions,   538 primitive gaussians,   342 cartesian basis functions
    51 alpha electrons       48 beta electrons
       nuclear repulsion energy       828.5343362305 Hartrees.
 IExCor= 4336 DFT=T Ex+Corr=M062X ExCW=0 ScaHFX=  0.540000
 ScaDFX=  1.000000  1.000000  1.000000  1.000000 ScalE2=  1.000000  1.000000
 IRadAn=      5 IRanWt=     -1 IRanGd=            0 ICorTp=0 IEmpDi=  4
 NAtoms=   19 NActive=   19 NUniq=   19 SFac= 1.00D+00 NAtFMM=   60 NAOKFM=F Big=F
 Integral buffers will be    131072 words long.
 Raffenetti 2 integral format.
 Two-electron integral symmetry is turned on.
 No density basis found on file   724.
 ------------------------------------------------------------------------------
 Polarizable Continuum Model (PCM)
 =================================
 Model                : PCM.
 Atomic radii         : SMD-Coulomb.
 Polarization charges : Total charges.
 Charge compensation  : None.
 Solution method      : On-the-fly selection.
 Cavity type          : VdW (van der Waals Surface) (Alpha=1.000).
 Cavity algorithm     : GePol (No added spheres)
                        Default sphere list used, NSphG=   19.
                        Lebedev-Laikov grids with approx.  5.0 points / Ang**2.
                        Smoothing algorithm: York/Karplus (Gamma=1.0000).
                        Polarization charges: spherical gaussians, with
                                              point-specific exponents (IZeta= 3).
                        Self-potential: point-specific (ISelfS= 7).
                        Self-field    : sphere-specific E.n sum rule (ISelfD= 2).
 1st derivatives      : Analytical E(r).r(x)/FMM algorithm (CHGder, D1EAlg=3).
                        Cavity 1st derivative terms included.
 Solvent              : Water, Eps=  78.355300 Eps(inf)=   1.777849
 ------------------------------------------------------------------------------
 Spheres list:
 ISph  on   Nord     Re0    Alpha      Xe            Ye            Ze
    1   C      1    1.8500  1.000     -0.263146      1.418842     -0.011596
    2   C      2    1.8500  1.000     -1.672274      1.180081     -0.015663
    3   C      3    1.8500  1.000     -2.188611     -0.125957      0.001330
    4   C      4    1.8500  1.000     -1.313659     -1.181680      0.045397
    5   C      5    1.8500  1.000      0.106429     -0.945146      0.094282
    6   C      6    1.8500  1.000      0.622025      0.356063      0.041671
    7   H      7    1.2000  1.000     -2.338907      2.037009     -0.043650
    8   H      8    1.2000  1.000     -1.599579     -2.228738      0.078258
    9   C      9    1.8500  1.000     -3.685444     -0.235031     -0.029737
   10   O     10    1.5200  1.000     -4.252105     -1.417618     -0.217014
   11   H     11    1.2000  1.000     -3.627035     -2.145539     -0.343189
   12   O     12    1.5200  1.000     -4.375524      0.740575      0.116773
   13   O     13    1.5200  1.000      0.843484     -2.013327      0.194079
   14   H     14    1.2000  1.000      1.793258     -1.801859      0.258342
   15   O     15    1.5200  1.000      1.959459      0.561338      0.057538
   16   H     16    1.2000  1.000      2.140624      1.504915      0.219187
   17   O     17    1.5200  1.000      0.262432      2.633474     -0.012937
   18   H     18    1.2000  1.000     -0.427587      3.317946     -0.013891
   19  Cr     19    1.5115  1.000      4.121889     -0.313430     -0.084028
 ------------------------------------------------------------------------------
 GePol: Number of generator spheres                  =      19
 GePol: Total number of spheres                      =      19
 GePol: Number of exposed spheres                    =      19 (100.00%)
 GePol: Number of points                             =    1482
 GePol: Average weight of points                     =       0.13
 GePol: Minimum weight of points                     =   0.39D-08
 GePol: Maximum weight of points                     =    0.21991
 GePol: Number of points with low weight             =      71
 GePol: Fraction of low-weight points (<1% of avg)   =       4.79%
 GePol: Cavity surface area                          =    190.475 Ang**2
 GePol: Cavity volume                                =    155.930 Ang**3
 ------------------------------------------------------------------------------
 Atomic radii for non-electrostatic terms: SMD-CDS.
 ------------------------------------------------------------------------------
 PCM non-electrostatic energy =         0.0106231339 Hartrees.
 Nuclear repulsion after PCM non-electrostatic terms =      828.5449593645 Hartrees.
 Leave Link  301 at Wed May 31 23:05:38 2023, MaxMem=  2684354560 cpu:               0.6 elap:               0.1
 (Enter /home/xut/apps/g16/l302.exe)
 NPDir=0 NMtPBC=     1 NCelOv=     1 NCel=       1 NClECP=     1 NCelD=      1
         NCelK=      1 NCelE2=     1 NClLst=     1 CellRange=     0.0.
 One-electron integrals computed using PRISM.
 One-electron integral symmetry used in STVInt
   1 Symmetry operations used in ECPInt.
 ECPInt:  NShTT=    6105 NPrTT=   23469 LenC2=    5792 LenP2D=   15747.
 LDataN:  DoStor=T MaxTD1= 4 Len=   56
 NBasis=   328 RedAO= T EigKep=  1.58D-06  NBF=   328
 NBsUse=   327 1.00D-06 EigRej=  5.97D-07 NBFU=   327
 Precomputing XC quadrature grid using
 IXCGrd= 4 IRadAn=           5 IRanWt=          -1 IRanGd=           0 AccXCQ= 0.00D+00.
 Generated NRdTot=       0 NPtTot=           0 NUsed=           0 NTot=          32
 NSgBfM=   342   342   342   342   342 MxSgAt=    19 MxSgA2=    19.
 Leave Link  302 at Wed May 31 23:05:38 2023, MaxMem=  2684354560 cpu:               2.5 elap:               0.3
 (Enter /home/xut/apps/g16/l303.exe)
 DipDrv:  MaxL=1.
 Leave Link  303 at Wed May 31 23:05:38 2023, MaxMem=  2684354560 cpu:               0.3 elap:               0.0
 (Enter /home/xut/apps/g16/l401.exe)
 Initial guess from the checkpoint file:  "149-91-7-para15-Cr.chk"
 B after Tr=    -0.000000   -0.000000    0.000000
         Rot=    0.999998   -0.001162    0.000146    0.001661 Ang=  -0.23 deg.
 Guess basis will be translated and rotated to current coordinates.
 JPrj=2 DoOrth=T DoCkMO=T.
 Initial guess <Sx>= 0.0000 <Sy>= 0.0000 <Sz>= 1.5000 <S**2>= 4.7491 S= 1.7359
 Generating alternative initial guess.
 ExpMin= 1.90D-02 ExpMax= 8.59D+03 ExpMxC= 1.30D+03 IAcc=3 IRadAn=         5 AccDes= 0.00D+00
 Harris functional with IExCor= 1009 and IRadAn=       5 diagonalized for initial guess.
 HarFok:  IExCor= 1009 AccDes= 0.00D+00 IRadAn=         5 IDoV= 1 UseB2=F ITyADJ=14
 ICtDFT=  3500011 ScaDFX=  1.000000  1.000000  1.000000  1.000000
 FoFCou: FMM=F IPFlag=           0 FMFlag=      100000 FMFlg1=           0
         NFxFlg=           0 DoJE=T BraDBF=F KetDBF=T FulRan=T
         wScrn=  0.000000 ICntrl=       500 IOpCl=  0 I1Cent=   200000004 NGrid=           0
         NMat0=    1 NMatS0=      1 NMatT0=    0 NMatD0=    1 NMtDS0=    0 NMtDT0=    0
 Petite list used in FoFCou.
 Harris En= -732.139508998904    
 Leave Link  401 at Wed May 31 23:05:40 2023, MaxMem=  2684354560 cpu:              11.4 elap:               1.2
 (Enter /home/xut/apps/g16/l502.exe)
 Integral symmetry usage will be decided dynamically.
 UHF open shell SCF:
 Using DIIS extrapolation, IDIIS=  1040.
 NGot=  2684354560 LenX=  2684113999 LenY=  2683996594
 Requested convergence on RMS density matrix=1.00D-05 within 128 cycles.
 Requested convergence on MAX density matrix=1.00D-03.
 Requested convergence on             energy=1.00D-03.
 No special actions if energy rises.
 Fock matrices will be formed incrementally for  20 cycles.

 Cycle   1  Pass 1  IDiag  1:
 FoFJK:  IHMeth= 1 ICntrl=       0 DoSepK=F KAlg= 0 I1Cent=           0 FoldK=F
 IRaf= 910000000 NMat=       1 IRICut=       1 DoRegI=T DoRafI=F ISym2E= 0 IDoP0=0 IntGTp=1.
 FoFCou: FMM=F IPFlag=           0 FMFlag=      100000 FMFlg1=           0
         NFxFlg=           0 DoJE=F BraDBF=F KetDBF=F FulRan=T
         wScrn=  0.000000 ICntrl=         0 IOpCl=  1 I1Cent=           0 NGrid=           0
         NMat0=    1 NMatS0=      1 NMatT0=    0 NMatD0=    1 NMtDS0=    0 NMtDT0=    0
 Symmetry not used in FoFCou.
 Inv3:  Mode=1 IEnd=     6588972.
 Iteration    1 A*A^-1 deviation from unit magnitude is 3.11D-15 for   1143.
 Iteration    1 A*A^-1 deviation from orthogonality  is 1.33D-15 for   1356   1148.
 Iteration    1 A^-1*A deviation from unit magnitude is 3.33D-15 for   1143.
 Iteration    1 A^-1*A deviation from orthogonality  is 1.41D-15 for    460    112.
 E= -732.192557274645    
 DIIS: error= 6.03D-03 at cycle   1 NSaved=   1.
 NSaved= 1 IEnMin= 1 EnMin= -732.192557274645     IErMin= 1 ErrMin= 6.03D-03
 ErrMax= 6.03D-03  0.00D+00 EMaxC= 1.00D-01 BMatC= 7.37D-02 BMatP= 7.37D-02
 IDIUse=3 WtCom= 9.40D-01 WtEn= 6.03D-02
 Coeff-Com:  0.100D+01
 Coeff-En:   0.100D+01
 Coeff:      0.100D+01
 Gap=     0.460 Goal=   None    Shift=    0.000
 Gap=     0.451 Goal=   None    Shift=    0.000
 GapD=    0.451 DampG=2.000 DampE=1.000 DampFc=2.0000 IDamp=-1.
 RMSDP=1.18D-02 MaxDP=1.31D+00              OVMax= 3.96D-02

 Cycle   2  Pass 1  IDiag  1:
 RMSU=  1.01D-02    CP:  9.29D-01
 E= -732.220145110720     Delta-E=       -0.027587836075 Rises=F Damp=F
 DIIS: error= 1.34D-03 at cycle   2 NSaved=   2.
 NSaved= 2 IEnMin= 2 EnMin= -732.220145110720     IErMin= 2 ErrMin= 1.34D-03
 ErrMax= 1.34D-03  0.00D+00 EMaxC= 1.00D-01 BMatC= 2.81D-03 BMatP= 7.37D-02
 IDIUse=3 WtCom= 9.87D-01 WtEn= 1.34D-02
 Coeff-Com: -0.120D+00 0.112D+01
 Coeff-En:   0.000D+00 0.100D+01
 Coeff:     -0.118D+00 0.112D+01
 Gap=     0.277 Goal=   None    Shift=    0.000
 Gap=     0.148 Goal=   None    Shift=    0.000
 RMSDP=1.82D-03 MaxDP=2.05D-01 DE=-2.76D-02 OVMax= 1.20D-02

 Cycle   3  Pass 1  IDiag  1:
 RMSU=  1.10D-03    CP:  9.15D-01  1.09D+00
 E= -732.221270040536     Delta-E=       -0.001124929816 Rises=F Damp=F
 DIIS: error= 7.19D-04 at cycle   3 NSaved=   3.
 NSaved= 3 IEnMin= 3 EnMin= -732.221270040536     IErMin= 3 ErrMin= 7.19D-04
 ErrMax= 7.19D-04  0.00D+00 EMaxC= 1.00D-01 BMatC= 1.30D-03 BMatP= 2.81D-03
 IDIUse=3 WtCom= 9.93D-01 WtEn= 7.19D-03
 Coeff-Com: -0.745D-01 0.495D+00 0.579D+00
 Coeff-En:   0.000D+00 0.000D+00 0.100D+01
 Coeff:     -0.739D-01 0.492D+00 0.582D+00
 Gap=     0.276 Goal=   None    Shift=    0.000
 Gap=     0.147 Goal=   None    Shift=    0.000
 RMSDP=3.76D-04 MaxDP=4.03D-02 DE=-1.12D-03 OVMax= 8.87D-03

 Cycle   4  Pass 1  IDiag  1:
 RMSU=  3.08D-04    CP:  9.17D-01  1.09D+00  8.69D-01
 E= -732.221536626656     Delta-E=       -0.000266586121 Rises=F Damp=F
 DIIS: error= 2.44D-04 at cycle   4 NSaved=   4.
 NSaved= 4 IEnMin= 4 EnMin= -732.221536626656     IErMin= 4 ErrMin= 2.44D-04
 ErrMax= 2.44D-04  0.00D+00 EMaxC= 1.00D-01 BMatC= 1.16D-04 BMatP= 1.30D-03
 IDIUse=3 WtCom= 9.98D-01 WtEn= 2.44D-03
 Coeff-Com:  0.105D-02-0.617D-01 0.193D+00 0.867D+00
 Coeff-En:   0.000D+00 0.000D+00 0.000D+00 0.100D+01
 Coeff:      0.104D-02-0.615D-01 0.193D+00 0.868D+00
 Gap=     0.276 Goal=   None    Shift=    0.000
 Gap=     0.148 Goal=   None    Shift=    0.000
 RMSDP=1.77D-04 MaxDP=2.87D-02 DE=-2.67D-04 OVMax= 2.26D-03

 Cycle   5  Pass 1  IDiag  1:
 RMSU=  7.01D-05    CP:  9.16D-01  1.09D+00  9.56D-01  8.59D-01
 E= -732.221573332862     Delta-E=       -0.000036706206 Rises=F Damp=F
 DIIS: error= 6.82D-05 at cycle   5 NSaved=   5.
 NSaved= 5 IEnMin= 5 EnMin= -732.221573332862     IErMin= 5 ErrMin= 6.82D-05
 ErrMax= 6.82D-05  0.00D+00 EMaxC= 1.00D-01 BMatC= 6.44D-06 BMatP= 1.16D-04
 IDIUse=1 WtCom= 1.00D+00 WtEn= 0.00D+00
 Coeff-Com:  0.448D-02-0.485D-01 0.270D-01 0.250D+00 0.768D+00
 Coeff:      0.448D-02-0.485D-01 0.270D-01 0.250D+00 0.768D+00
 Gap=     0.276 Goal=   None    Shift=    0.000
 Gap=     0.148 Goal=   None    Shift=    0.000
 RMSDP=3.57D-05 MaxDP=2.27D-03 DE=-3.67D-05 OVMax= 2.32D-03

 Cycle   6  Pass 1  IDiag  1:
 RMSU=  3.35D-05    CP:  9.16D-01  1.09D+00  9.61D-01  8.44D-01  1.12D+00
 E= -732.221578505859     Delta-E=       -0.000005172997 Rises=F Damp=F
 DIIS: error= 6.26D-05 at cycle   6 NSaved=   6.
 NSaved= 6 IEnMin= 6 EnMin= -732.221578505859     IErMin= 6 ErrMin= 6.26D-05
 ErrMax= 6.26D-05  0.00D+00 EMaxC= 1.00D-01 BMatC= 1.97D-06 BMatP= 6.44D-06
 IDIUse=1 WtCom= 1.00D+00 WtEn= 0.00D+00
 Coeff-Com:  0.109D-02-0.651D-02-0.116D-01-0.483D-01 0.209D+00 0.856D+00
 Coeff:      0.109D-02-0.651D-02-0.116D-01-0.483D-01 0.209D+00 0.856D+00
 Gap=     0.276 Goal=   None    Shift=    0.000
 Gap=     0.148 Goal=   None    Shift=    0.000
 RMSDP=2.23D-05 MaxDP=2.73D-03 DE=-5.17D-06 OVMax= 2.44D-03

 Cycle   7  Pass 1  IDiag  1:
 RMSU=  1.25D-05    CP:  9.16D-01  1.09D+00  9.65D-01  8.37D-01  1.27D+00
                    CP:  1.35D+00
 E= -732.221582241920     Delta-E=       -0.000003736060 Rises=F Damp=F
 DIIS: error= 5.42D-05 at cycle   7 NSaved=   7.
 NSaved= 7 IEnMin= 7 EnMin= -732.221582241920     IErMin= 7 ErrMin= 5.42D-05
 ErrMax= 5.42D-05  0.00D+00 EMaxC= 1.00D-01 BMatC= 1.28D-06 BMatP= 1.97D-06
 IDIUse=1 WtCom= 1.00D+00 WtEn= 0.00D+00
 Coeff-Com: -0.656D-03 0.865D-02-0.349D-02-0.762D-01-0.101D+00 0.272D+00
 Coeff-Com:  0.901D+00
 Coeff:     -0.656D-03 0.865D-02-0.349D-02-0.762D-01-0.101D+00 0.272D+00
 Coeff:      0.901D+00
 Gap=     0.276 Goal=   None    Shift=    0.000
 Gap=     0.148 Goal=   None    Shift=    0.000
 RMSDP=2.35D-05 MaxDP=3.60D-03 DE=-3.74D-06 OVMax= 2.53D-03

 Cycle   8  Pass 1  IDiag  1:
 RMSU=  6.68D-06    CP:  9.15D-01  1.08D+00  9.74D-01  8.25D-01  1.37D+00
                    CP:  1.58D+00  2.07D+00
 E= -732.221585758128     Delta-E=       -0.000003516208 Rises=F Damp=F
 DIIS: error= 4.91D-05 at cycle   8 NSaved=   8.
 NSaved= 8 IEnMin= 8 EnMin= -732.221585758128     IErMin= 8 ErrMin= 4.91D-05
 ErrMax= 4.91D-05  0.00D+00 EMaxC= 1.00D-01 BMatC= 1.03D-06 BMatP= 1.28D-06
 IDIUse=1 WtCom= 1.00D+00 WtEn= 0.00D+00
 Coeff-Com: -0.730D-03 0.585D-02 0.921D-02-0.129D-01-0.117D+00-0.258D+00
 Coeff-Com:  0.198D+00 0.118D+01
 Coeff:     -0.730D-03 0.585D-02 0.921D-02-0.129D-01-0.117D+00-0.258D+00
 Coeff:      0.198D+00 0.118D+01
 Gap=     0.276 Goal=   None    Shift=    0.000
 Gap=     0.148 Goal=   None    Shift=    0.000
 RMSDP=2.96D-05 MaxDP=4.23D-03 DE=-3.52D-06 OVMax= 3.35D-03

 Cycle   9  Pass 1  IDiag  1:
 RMSU=  8.02D-06    CP:  9.15D-01  1.08D+00  9.85D-01  8.11D-01  1.47D+00
                    CP:  1.90D+00  3.00D+00  2.21D+00
 E= -732.221590133793     Delta-E=       -0.000004375665 Rises=F Damp=F
 DIIS: error= 4.07D-05 at cycle   9 NSaved=   9.
 NSaved= 9 IEnMin= 9 EnMin= -732.221590133793     IErMin= 9 ErrMin= 4.07D-05
 ErrMax= 4.07D-05  0.00D+00 EMaxC= 1.00D-01 BMatC= 8.25D-07 BMatP= 1.03D-06
 IDIUse=1 WtCom= 1.00D+00 WtEn= 0.00D+00
 Coeff-Com:  0.446D-03-0.768D-02 0.128D-01 0.641D-01 0.698D-01-0.339D+00
 Coeff-Com: -0.982D+00 0.232D+00 0.195D+01
 Coeff:      0.446D-03-0.768D-02 0.128D-01 0.641D-01 0.698D-01-0.339D+00
 Coeff:     -0.982D+00 0.232D+00 0.195D+01
 Gap=     0.276 Goal=   None    Shift=    0.000
 Gap=     0.148 Goal=   None    Shift=    0.000
 RMSDP=6.33D-05 MaxDP=9.27D-03 DE=-4.38D-06 OVMax= 7.17D-03

 Cycle  10  Pass 1  IDiag  1:
 RMSU=  2.84D-05    CP:  9.15D-01  1.08D+00  1.01D+00  7.81D-01  1.68D+00
                    CP:  2.53D+00  3.00D+00  3.00D+00  3.00D+00
 E= -732.221598285148     Delta-E=       -0.000008151355 Rises=F Damp=F
 DIIS: error= 2.22D-05 at cycle  10 NSaved=  10.
 NSaved=10 IEnMin=10 EnMin= -732.221598285148     IErMin=10 ErrMin= 2.22D-05
 ErrMax= 2.22D-05  0.00D+00 EMaxC= 1.00D-01 BMatC= 6.65D-07 BMatP= 8.25D-07
 IDIUse=1 WtCom= 1.00D+00 WtEn= 0.00D+00
 Coeff-Com:  0.732D-03-0.832D-02 0.243D-02 0.366D-01 0.119D+00 0.201D-01
 Coeff-Com: -0.700D+00-0.772D+00 0.126D+01 0.104D+01
 Coeff:      0.732D-03-0.832D-02 0.243D-02 0.366D-01 0.119D+00 0.201D-01
 Coeff:     -0.700D+00-0.772D+00 0.126D+01 0.104D+01
 Gap=     0.276 Goal=   None    Shift=    0.000
 Gap=     0.148 Goal=   None    Shift=    0.000
 RMSDP=5.02D-05 MaxDP=6.76D-03 DE=-8.15D-06 OVMax= 5.54D-03

 Cycle  11  Pass 1  IDiag  1:
 RMSU=  9.32D-06    CP:  9.15D-01  1.08D+00  1.03D+00  7.59D-01  1.84D+00
                    CP:  3.00D+00  3.00D+00  3.00D+00  3.00D+00  2.24D+00
 E= -732.221603806677     Delta-E=       -0.000005521529 Rises=F Damp=F
 DIIS: error= 2.39D-05 at cycle  11 NSaved=  11.
 NSaved=11 IEnMin=11 EnMin= -732.221603806677     IErMin=10 ErrMin= 2.22D-05
 ErrMax= 2.39D-05  0.00D+00 EMaxC= 1.00D-01 BMatC= 5.08D-07 BMatP= 6.65D-07
 IDIUse=1 WtCom= 1.00D+00 WtEn= 0.00D+00
 Coeff-Com:  0.555D-04 0.387D-03-0.326D-02-0.137D-01 0.575D-02 0.142D+00
 Coeff-Com:  0.152D+00-0.312D+00-0.305D+00 0.161D+00 0.117D+01
 Coeff:      0.555D-04 0.387D-03-0.326D-02-0.137D-01 0.575D-02 0.142D+00
 Coeff:      0.152D+00-0.312D+00-0.305D+00 0.161D+00 0.117D+01
 Gap=     0.276 Goal=   None    Shift=    0.000
 Gap=     0.148 Goal=   None    Shift=    0.000
 RMSDP=2.58D-05 MaxDP=2.82D-03 DE=-5.52D-06 OVMax= 2.53D-03

 Cycle  12  Pass 1  IDiag  1:
 RMSU=  9.92D-06    CP:  9.15D-01  1.08D+00  1.03D+00  7.47D-01  1.92D+00
                    CP:  3.00D+00  3.00D+00  3.00D+00  3.00D+00  2.88D+00
                    CP:  1.84D+00
 E= -732.221606958917     Delta-E=       -0.000003152240 Rises=F Damp=F
 DIIS: error= 2.36D-05 at cycle  12 NSaved=  12.
 NSaved=12 IEnMin=12 EnMin= -732.221606958917     IErMin=10 ErrMin= 2.22D-05
 ErrMax= 2.36D-05  0.00D+00 EMaxC= 1.00D-01 BMatC= 4.82D-07 BMatP= 5.08D-07
 IDIUse=1 WtCom= 1.00D+00 WtEn= 0.00D+00
 Coeff-Com: -0.260D-03 0.344D-02-0.221D-02-0.204D-01-0.445D-01 0.626D-01
 Coeff-Com:  0.338D+00 0.167D+00-0.596D+00-0.364D+00 0.563D+00 0.894D+00
 Coeff:     -0.260D-03 0.344D-02-0.221D-02-0.204D-01-0.445D-01 0.626D-01
 Coeff:      0.338D+00 0.167D+00-0.596D+00-0.364D+00 0.563D+00 0.894D+00
 Gap=     0.276 Goal=   None    Shift=    0.000
 Gap=     0.148 Goal=   None    Shift=    0.000
 RMSDP=1.17D-05 MaxDP=7.77D-04 DE=-3.15D-06 OVMax= 1.45D-03

 Cycle  13  Pass 1  IDiag  1:
 RMSU=  4.95D-06    CP:  9.15D-01  1.08D+00  1.03D+00  7.45D-01  1.95D+00
                    CP:  3.00D+00  3.00D+00  3.00D+00  3.00D+00  3.00D+00
                    CP:  2.40D+00  1.62D+00
 E= -732.221608793911     Delta-E=       -0.000001834994 Rises=F Damp=F
 DIIS: error= 2.27D-05 at cycle  13 NSaved=  13.
 NSaved=13 IEnMin=13 EnMin= -732.221608793911     IErMin=10 ErrMin= 2.22D-05
 ErrMax= 2.27D-05  0.00D+00 EMaxC= 1.00D-01 BMatC= 4.67D-07 BMatP= 4.82D-07
 IDIUse=1 WtCom= 1.00D+00 WtEn= 0.00D+00
 Coeff-Com:  0.233D-04-0.671D-03 0.114D-02 0.837D-02 0.376D-02-0.565D-01
 Coeff-Com: -0.111D+00 0.642D-01 0.190D+00 0.735D-02-0.519D+00-0.167D+00
 Coeff-Com:  0.158D+01
 Coeff:      0.233D-04-0.671D-03 0.114D-02 0.837D-02 0.376D-02-0.565D-01
 Coeff:     -0.111D+00 0.642D-01 0.190D+00 0.735D-02-0.519D+00-0.167D+00
 Coeff:      0.158D+01
 Gap=     0.276 Goal=   None    Shift=    0.000
 Gap=     0.148 Goal=   None    Shift=    0.000
 RMSDP=1.83D-05 MaxDP=1.23D-03 DE=-1.83D-06 OVMax= 2.28D-03

 Cycle  14  Pass 1  IDiag  1:
 RMSU=  4.78D-06    CP:  9.15D-01  1.08D+00  1.03D+00  7.45D-01  1.99D+00
                    CP:  3.00D+00  3.00D+00  3.00D+00  3.00D+00  3.00D+00
                    CP:  3.00D+00  2.62D+00  3.00D+00
 E= -732.221611673987     Delta-E=       -0.000002880076 Rises=F Damp=F
 DIIS: error= 2.17D-05 at cycle  14 NSaved=  14.
 NSaved=14 IEnMin=14 EnMin= -732.221611673987     IErMin=14 ErrMin= 2.17D-05
 ErrMax= 2.17D-05  0.00D+00 EMaxC= 1.00D-01 BMatC= 4.63D-07 BMatP= 4.67D-07
 IDIUse=1 WtCom= 1.00D+00 WtEn= 0.00D+00
 Coeff-Com:  0.136D-03-0.201D-02 0.152D-02 0.143D-01 0.240D-01-0.579D-01
 Coeff-Com: -0.226D+00-0.339D-01 0.392D+00 0.200D+00-0.541D+00-0.593D+00
 Coeff-Com:  0.908D+00 0.915D+00
 Coeff:      0.136D-03-0.201D-02 0.152D-02 0.143D-01 0.240D-01-0.579D-01
 Coeff:     -0.226D+00-0.339D-01 0.392D+00 0.200D+00-0.541D+00-0.593D+00
 Coeff:      0.908D+00 0.915D+00
 Gap=     0.276 Goal=   None    Shift=    0.000
 Gap=     0.148 Goal=   None    Shift=    0.000
 RMSDP=1.20D-05 MaxDP=8.69D-04 DE=-2.88D-06 OVMax= 1.65D-03

 Cycle  15  Pass 1  IDiag  1:
 RMSU=  8.60D-06    CP:  9.15D-01  1.08D+00  1.03D+00  7.47D-01  2.01D+00
                    CP:  3.00D+00  3.00D+00  3.00D+00  3.00D+00  3.00D+00
                    CP:  3.00D+00  3.00D+00  3.00D+00  1.94D+00
 E= -732.221613737072     Delta-E=       -0.000002063085 Rises=F Damp=F
 DIIS: error= 2.09D-05 at cycle  15 NSaved=  15.
 NSaved=15 IEnMin=15 EnMin= -732.221613737072     IErMin=15 ErrMin= 2.09D-05
 ErrMax= 2.09D-05  0.00D+00 EMaxC= 1.00D-01 BMatC= 4.58D-07 BMatP= 4.63D-07
 IDIUse=1 WtCom= 1.00D+00 WtEn= 0.00D+00
 Coeff-Com:  0.176D-04 0.772D-04-0.114D-02-0.345D-02 0.478D-02 0.381D-01
 Coeff-Com:  0.390D-01-0.787D-01-0.109D+00 0.770D-01 0.358D+00-0.945D-01
 Coeff-Com: -0.101D+01-0.274D+00 0.205D+01
 Coeff:      0.176D-04 0.772D-04-0.114D-02-0.345D-02 0.478D-02 0.381D-01
 Coeff:      0.390D-01-0.787D-01-0.109D+00 0.770D-01 0.358D+00-0.945D-01
 Coeff:     -0.101D+01-0.274D+00 0.205D+01
 Gap=     0.276 Goal=   None    Shift=    0.000
 Gap=     0.148 Goal=   None    Shift=    0.000
 RMSDP=2.74D-05 MaxDP=1.98D-03 DE=-2.06D-06 OVMax= 3.67D-03

 Cycle  16  Pass 1  IDiag  1:
 RMSU=  1.18D-05    CP:  9.15D-01  1.08D+00  1.03D+00  7.49D-01  2.06D+00
                    CP:  3.00D+00  3.00D+00  3.00D+00  3.00D+00  3.00D+00
                    CP:  3.00D+00  3.00D+00  3.00D+00  3.00D+00  3.00D+00
 E= -732.221618368133     Delta-E=       -0.000004631061 Rises=F Damp=F
 DIIS: error= 2.01D-05 at cycle  16 NSaved=  16.
 NSaved=16 IEnMin=16 EnMin= -732.221618368133     IErMin=16 ErrMin= 2.01D-05
 ErrMax= 2.01D-05  0.00D+00 EMaxC= 1.00D-01 BMatC= 4.55D-07 BMatP= 4.58D-07
 IDIUse=1 WtCom= 1.00D+00 WtEn= 0.00D+00
 Coeff-Com: -0.790D-04 0.114D-02-0.947D-03-0.714D-02-0.136D-01 0.230D-01
 Coeff-Com:  0.126D+00 0.354D-01-0.229D+00-0.950D-01 0.254D+00 0.267D+00
 Coeff-Com: -0.172D+00-0.813D+00-0.127D+00 0.175D+01
 Coeff:     -0.790D-04 0.114D-02-0.947D-03-0.714D-02-0.136D-01 0.230D-01
 Coeff:      0.126D+00 0.354D-01-0.229D+00-0.950D-01 0.254D+00 0.267D+00
 Coeff:     -0.172D+00-0.813D+00-0.127D+00 0.175D+01
 Gap=     0.276 Goal=   None    Shift=    0.000
 Gap=     0.148 Goal=   None    Shift=    0.000
 RMSDP=2.85D-05 MaxDP=2.08D-03 DE=-4.63D-06 OVMax= 3.83D-03

 Cycle  17  Pass 1  IDiag  1:
 RMSU=  1.61D-05    CP:  9.15D-01  1.08D+00  1.02D+00  7.51D-01  2.11D+00
                    CP:  3.00D+00  3.00D+00  3.00D+00  3.00D+00  3.00D+00
                    CP:  3.00D+00  3.00D+00  3.00D+00  3.00D+00  3.00D+00
                    CP:  2.87D+00
 E= -732.221623238466     Delta-E=       -0.000004870333 Rises=F Damp=F
 DIIS: error= 1.97D-05 at cycle  17 NSaved=  17.
 NSaved=17 IEnMin=17 EnMin= -732.221623238466     IErMin=17 ErrMin= 1.97D-05
 ErrMax= 1.97D-05  0.00D+00 EMaxC= 1.00D-01 BMatC= 4.53D-07 BMatP= 4.55D-07
 IDIUse=1 WtCom= 1.00D+00 WtEn= 0.00D+00
 Coeff-Com: -0.231D-04 0.983D-04 0.556D-03 0.186D-02-0.506D-02-0.280D-01
 Coeff-Com: -0.435D-02 0.623D-01 0.314D-01-0.482D-01-0.246D+00 0.667D-01
 Coeff-Com:  0.965D+00-0.247D+00-0.166D+01 0.859D+00 0.125D+01
 Coeff:     -0.231D-04 0.983D-04 0.556D-03 0.186D-02-0.506D-02-0.280D-01
 Coeff:     -0.435D-02 0.623D-01 0.314D-01-0.482D-01-0.246D+00 0.667D-01
 Coeff:      0.965D+00-0.247D+00-0.166D+01 0.859D+00 0.125D+01
 Gap=     0.276 Goal=   None    Shift=    0.000
 Gap=     0.148 Goal=   None    Shift=    0.000
 RMSDP=2.76D-05 MaxDP=2.02D-03 DE=-4.87D-06 OVMax= 3.71D-03

 Cycle  18  Pass 1  IDiag  1:
 RMSU=  1.98D-05    CP:  9.14D-01  1.08D+00  1.02D+00  7.53D-01  2.16D+00
                    CP:  3.00D+00  3.00D+00  3.00D+00  3.00D+00  3.00D+00
                    CP:  3.00D+00  3.00D+00  3.00D+00  3.00D+00  3.00D+00
                    CP:  3.00D+00  1.98D+00
 E= -732.221627966674     Delta-E=       -0.000004728208 Rises=F Damp=F
 DIIS: error= 1.98D-05 at cycle  18 NSaved=  18.
 NSaved=18 IEnMin=18 EnMin= -732.221627966674     IErMin=17 ErrMin= 1.97D-05
 ErrMax= 1.98D-05  0.00D+00 EMaxC= 1.00D-01 BMatC= 4.51D-07 BMatP= 4.53D-07
 IDIUse=1 WtCom= 1.00D+00 WtEn= 0.00D+00
 Coeff-Com:  0.388D-04-0.681D-03 0.743D-03 0.553D-02 0.713D-02-0.295D-01
 Coeff-Com: -0.850D-01 0.866D-02 0.156D+00 0.446D-01-0.287D+00-0.171D+00
 Coeff-Com:  0.633D+00 0.313D+00-0.633D+00-0.694D+00 0.505D+00 0.123D+01
 Coeff:      0.388D-04-0.681D-03 0.743D-03 0.553D-02 0.713D-02-0.295D-01
 Coeff:     -0.850D-01 0.866D-02 0.156D+00 0.446D-01-0.287D+00-0.171D+00
 Coeff:      0.633D+00 0.313D+00-0.633D+00-0.694D+00 0.505D+00 0.123D+01
 Gap=     0.276 Goal=   None    Shift=    0.000
 Gap=     0.148 Goal=   None    Shift=    0.000
 RMSDP=2.68D-05 MaxDP=1.95D-03 DE=-4.73D-06 OVMax= 3.61D-03

 Cycle  19  Pass 1  IDiag  1:
 RMSU=  6.62D-07    CP:  9.14D-01  1.08D+00  1.02D+00  7.54D-01  2.21D+00
                    CP:  3.00D+00  3.00D+00  3.00D+00  3.00D+00  3.00D+00
                    CP:  3.00D+00  3.00D+00  3.00D+00  3.00D+00  3.00D+00
                    CP:  3.00D+00  2.92D+00  2.05D+00
 E= -732.221632560217     Delta-E=       -0.000004593543 Rises=F Damp=F
 DIIS: error= 2.00D-05 at cycle  19 NSaved=  19.
 NSaved=19 IEnMin=19 EnMin= -732.221632560217     IErMin=17 ErrMin= 1.97D-05
 ErrMax= 2.00D-05  0.00D+00 EMaxC= 1.00D-01 BMatC= 4.50D-07 BMatP= 4.51D-07
 IDIUse=1 WtCom= 1.00D+00 WtEn= 0.00D+00
 Coeff-Com:  0.261D-04-0.444D-03 0.429D-03 0.351D-02 0.510D-02-0.176D-01
 Coeff-Com: -0.553D-01 0.216D-02 0.997D-01 0.336D-01-0.175D+00-0.122D+00
 Coeff-Com:  0.372D+00 0.191D+00-0.305D+00-0.451D+00 0.234D+00 0.750D+00
 Coeff-Com:  0.435D+00
 Coeff:      0.261D-04-0.444D-03 0.429D-03 0.351D-02 0.510D-02-0.176D-01
 Coeff:     -0.553D-01 0.216D-02 0.997D-01 0.336D-01-0.175D+00-0.122D+00
 Coeff:      0.372D+00 0.191D+00-0.305D+00-0.451D+00 0.234D+00 0.750D+00
 Coeff:      0.435D+00
 Gap=     0.276 Goal=   None    Shift=    0.000
 Gap=     0.148 Goal=   None    Shift=    0.000
 RMSDP=3.50D-06 MaxDP=2.43D-04 DE=-4.59D-06 OVMax= 4.79D-04

 Error on total polarization charges =  0.04618
 SCF Done:  E(UM062X) =  -732.221632560     A.U. after   19 cycles
            NFock= 19  Conv=0.35D-05     -V/T= 2.0644
 <Sx>= 0.0000 <Sy>= 0.0000 <Sz>= 1.5000 <S**2>= 4.7535 S= 1.7369
 <L.S>=  0.00000000000    
 KE= 6.879305982595D+02 PE=-3.316978759220D+03 EE= 1.068281569036D+03
 SMD-CDS (non-electrostatic) energy       (kcal/mol) =       6.67
 (included in total energy above)
 Annihilation of the first spin contaminant:
 S**2 before annihilation     4.7535,   after     3.7862
 Leave Link  502 at Wed May 31 23:07:17 2023, MaxMem=  2684354560 cpu:             966.5 elap:              97.0
 (Enter /home/xut/apps/g16/l701.exe)
 ... and contract with generalized density number  0.
 Compute integral first derivatives.
   1 Symmetry operations used in ECPInt.
 ECPInt:  NShTT=    6105 NPrTT=   23469 LenC2=    5792 LenP2D=   15747.
 LDataN:  DoStor=T MaxTD1= 5 Len=  102
 D1PCM: PCM CHGder 1st derivatives, ID1Alg=3 FixD1E=F DoIter=F DoCFld=F I1PDM=0.
 GePol: Maximum number of non-zero 1st derivatives   =     185
 Leave Link  701 at Wed May 31 23:07:18 2023, MaxMem=  2684354560 cpu:              10.2 elap:               1.0
 (Enter /home/xut/apps/g16/l702.exe)
 L702 exits ... SP integral derivatives will be done elsewhere.
 Leave Link  702 at Wed May 31 23:07:18 2023, MaxMem=  2684354560 cpu:               0.1 elap:               0.0
 (Enter /home/xut/apps/g16/l703.exe)
 Integral derivatives from FoFJK, PRISM(SPDF).
 Compute integral first derivatives, UseDBF=F ICtDFT=           0.
 Calling FoFJK, ICntrl=      2127 FMM=F ISym2X=0 I1Cent= 0 IOpClX= 1 NMat=1 NMatS=1 NMatT=0.
 FoFJK:  IHMeth= 1 ICntrl=    2127 DoSepK=F KAlg= 0 I1Cent=           0 FoldK=F
 IRaf=         0 NMat=       1 IRICut=       1 DoRegI=T DoRafI=F ISym2E= 0 IDoP0=0 IntGTp=1.
 FoFCou: FMM=F IPFlag=           0 FMFlag=      100000 FMFlg1=         800
         NFxFlg=           0 DoJE=F BraDBF=F KetDBF=F FulRan=T
         wScrn=  0.000000 ICntrl=      2127 IOpCl=  1 I1Cent=           0 NGrid=           0
         NMat0=    1 NMatS0=      1 NMatT0=    0 NMatD0=    1 NMtDS0=    0 NMtDT0=    0
 Symmetry not used in FoFCou.
 Leave Link  703 at Wed May 31 23:07:29 2023, MaxMem=  2684354560 cpu:             110.3 elap:              11.1
 (Enter /home/xut/apps/g16/l716.exe)
 Dipole        = 1.60444486D+01-1.06958062D+00-2.54333983D-01
 ***** Axes restored to original set *****
 -------------------------------------------------------------------
 Center     Atomic                   Forces (Hartrees/Bohr)
 Number     Number              X              Y              Z
 -------------------------------------------------------------------
      1        6          -0.003841074   -0.008914493    0.003169936
      2        6           0.007190246    0.004243237   -0.000758405
      3        6           0.002569151   -0.003935979   -0.001941252
      4        6          -0.005491176   -0.000257935    0.001272011
      5        6          -0.002500174   -0.001615035   -0.000620815
      6        6           0.000504785    0.006499575   -0.002005789
      7        1           0.000455579   -0.000899302    0.000102049
      8        1          -0.001391331    0.001550726   -0.000056579
      9        6           0.002217101   -0.000350686    0.001782352
     10        8           0.000095895   -0.004734754   -0.000237600
     11        1          -0.000615301    0.000396184   -0.000769036
     12        8          -0.002349174    0.003361463    0.000100702
     13        8           0.004430986    0.002197880   -0.000091819
     14        1           0.001747780   -0.000344161   -0.000384393
     15        8          -0.002923514    0.002416763    0.000574273
     16        1           0.000274189   -0.001243849   -0.000319172
     17        8          -0.002979269    0.004599338   -0.001317137
     18        1           0.002496262    0.000458397   -0.000199038
     19       24           0.000109040   -0.003427368    0.001699710
 -------------------------------------------------------------------
 Cartesian Forces:  Max     0.008914493 RMS     0.002775739
 Leave Link  716 at Wed May 31 23:07:29 2023, MaxMem=  2684354560 cpu:               0.2 elap:               0.0
 (Enter /home/xut/apps/g16/l103.exe)

 GradGradGradGradGradGradGradGradGradGradGradGradGradGradGradGradGradGrad
 Berny optimization.
 Using GEDIIS/GDIIS optimizer.
 FormGI is forming the generalized inverse of G from B-inverse, IUseBI=4.
 Internal  Forces:  Max     0.010707457 RMS     0.002822336
 Search for a local minimum.
 Step number   4 out of a maximum of   94
 All quantities printed in internal units (Hartrees-Bohrs-Radians)
 RMS Force = .28223D-02 SwitMx=.10000D-02 MixMth= 1
 Mixed Optimization -- RFO/linear search
 Update second derivatives using D2CorX and points    2    3    4
 DE= -2.38D-03 DEPred=-2.18D-03 R= 1.09D+00
 TightC=F SS=  1.41D+00  RLast= 3.89D-01 DXNew= 1.4270D+00 1.1659D+00
 Trust test= 1.09D+00 RLast= 3.89D-01 DXMaxT set to 1.17D+00
 ITU=  1  1  1  0
 Use linear search instead of GDIIS.
     Eigenvalues ---    0.00187   0.00769   0.01110   0.01148   0.01408
     Eigenvalues ---    0.01668   0.01739   0.01762   0.01973   0.01999
     Eigenvalues ---    0.02269   0.02386   0.02502   0.02969   0.02999
     Eigenvalues ---    0.03038   0.06996   0.15809   0.15995   0.15999
     Eigenvalues ---    0.16040   0.16052   0.16551   0.22689   0.23022
     Eigenvalues ---    0.23681   0.24299   0.24988   0.24998   0.25000
     Eigenvalues ---    0.25011   0.25631   0.28587   0.30492   0.37120
     Eigenvalues ---    0.37288   0.38559   0.41586   0.42835   0.44440
     Eigenvalues ---    0.50208   0.53802   0.54713   0.55228   0.55473
     Eigenvalues ---    0.55496   0.59215   0.65020   0.66846   0.72317
     Eigenvalues ---    0.84928
 RFO step:  Lambda=-3.34518519D-03 EMin= 1.86774022D-03
 Quartic linear search produced a step of  0.13782.
 Iteration  1 RMS(Cart)=  0.09369993 RMS(Int)=  0.00570118
 Iteration  2 RMS(Cart)=  0.00766218 RMS(Int)=  0.00026339
 Iteration  3 RMS(Cart)=  0.00004847 RMS(Int)=  0.00026081
 Iteration  4 RMS(Cart)=  0.00000001 RMS(Int)=  0.00026081
 ITry= 1 IFail=0 DXMaxC= 4.53D-01 DCOld= 1.00D+10 DXMaxT= 1.17D+00 DXLimC= 3.00D+00 Rises=F
 Variable       Old X    -DE/DX   Delta X   Delta X   Delta X     New X
                                 (Linear)    (Quad)   (Total)
    R1        2.70083  -0.00474  -0.00092  -0.01275  -0.01367   2.68717
    R2        2.61566  -0.00336  -0.00108  -0.00722  -0.00827   2.60739
    R3        2.50099   0.00446   0.00076   0.01547   0.01623   2.51722
    R4        2.65412   0.00418   0.00039   0.01117   0.01153   2.66565
    R5        2.05234  -0.00099  -0.00051  -0.00151  -0.00202   2.05032
    R6        2.59246  -0.00435  -0.00053  -0.00617  -0.00673   2.58573
    R7        2.83671   0.00077   0.00202   0.00359   0.00561   2.84233
    R8        2.72212   0.00222   0.00544   0.01465   0.02009   2.74221
    R9        2.05204  -0.00113  -0.00020  -0.00097  -0.00117   2.05087
   R10        2.64680  -0.00033   0.00162   0.00965   0.01130   2.65810
   R11        2.45971   0.00195   0.00157   0.01054   0.01211   2.47182
   R12        2.55716  -0.00285   0.00140  -0.01669  -0.01528   2.54187
   R13        2.50322   0.00417   0.00154   0.01868   0.02022   2.52344
   R14        2.27513   0.00412   0.00174   0.00260   0.00434   2.27946
   R15        1.82875  -0.00064  -0.00011  -0.00004  -0.00015   1.82859
   R16        1.84277   0.00158  -0.00035   0.00384   0.00349   1.84626
   R17        1.84119  -0.00124  -0.00027  -0.00057  -0.00084   1.84034
   R18        4.41621   0.00128   0.00815   0.08417   0.09232   4.50853
   R19        1.83666  -0.00147  -0.00017  -0.00114  -0.00130   1.83536
    A1        2.09712  -0.00119   0.00145  -0.00101   0.00059   2.09771
    A2        2.14701  -0.00052  -0.00080   0.00198   0.00106   2.14808
    A3        2.03841   0.00172  -0.00071  -0.00114  -0.00195   2.03646
    A4        2.11504   0.00113   0.00148   0.01160   0.01312   2.12816
    A5        2.06399  -0.00038  -0.00095  -0.00836  -0.00943   2.05456
    A6        2.10409  -0.00074  -0.00052  -0.00302  -0.00366   2.10043
    A7        2.07319   0.00078  -0.00125  -0.00387  -0.00521   2.06798
    A8        2.01961   0.00268   0.00114   0.00645   0.00739   2.02700
    A9        2.19039  -0.00345   0.00012  -0.00261  -0.00268   2.18771
   A10        2.09841  -0.00275  -0.00013  -0.00887  -0.00897   2.08945
   A11        2.18349  -0.00043  -0.00117  -0.00147  -0.00277   2.18071
   A12        2.00081   0.00318   0.00124   0.00974   0.01084   2.01165
   A13        2.11085   0.00085  -0.00018   0.00749   0.00744   2.11829
   A14        2.01096   0.00643   0.00169   0.02026   0.02184   2.03280
   A15        2.16136  -0.00728  -0.00151  -0.02779  -0.02940   2.13197
   A16        2.07071   0.00122  -0.00145  -0.00502  -0.00683   2.06388
   A17        2.11301   0.00948  -0.00168   0.02798   0.02556   2.13857
   A18        2.09939  -0.01071   0.00314  -0.02359  -0.02109   2.07831
   A19        2.08789  -0.00188  -0.00170  -0.01540  -0.01716   2.07073
   A20        2.10615   0.00092   0.00158   0.01190   0.01342   2.11957
   A21        2.08914   0.00096   0.00011   0.00355   0.00360   2.09274
   A22        1.99725   0.00052   0.00012  -0.00745  -0.00733   1.98992
   A23        1.95909   0.00130   0.00287   0.00659   0.00945   1.96855
   A24        1.90989   0.00500   0.00058   0.01937   0.01911   1.92901
   A25        2.60032  -0.00904   0.00227  -0.02347  -0.02205   2.57827
   A26        1.77267   0.00400  -0.00137   0.00501   0.00280   1.77547
   A27        1.94378   0.00386   0.00238   0.01732   0.01970   1.96348
    D1       -0.02700   0.00017  -0.00134   0.00117  -0.00009  -0.02709
    D2        3.12646  -0.00027  -0.00185  -0.01963  -0.02151   3.10495
    D3       -3.12879  -0.00010   0.00158   0.00650   0.00828  -3.12051
    D4        0.02467  -0.00054   0.00107  -0.01430  -0.01314   0.01154
    D5       -0.00272   0.00034   0.00043   0.00939   0.00978   0.00706
    D6       -3.13201   0.00145   0.00469   0.06768   0.07298  -3.05903
    D7        3.10148   0.00055  -0.00232   0.00446   0.00200   3.10348
    D8       -0.02781   0.00166   0.00194   0.06275   0.06520   0.03738
    D9        0.00340   0.00006  -0.00031   0.00448   0.00413   0.00752
   D10       -3.09964  -0.00014   0.00250   0.00964   0.01217  -3.08746
   D11        0.01936  -0.00042   0.00013  -0.00945  -0.00944   0.00992
   D12       -3.12344  -0.00085  -0.00049  -0.03950  -0.04017   3.11958
   D13       -3.13437   0.00004   0.00065   0.01179   0.01250  -3.12187
   D14        0.00602  -0.00040   0.00002  -0.01826  -0.01823  -0.01222
   D15        0.01673   0.00014   0.00186   0.00681   0.00855   0.02528
   D16        3.12333   0.00014  -0.00077  -0.01485  -0.01551   3.10782
   D17       -3.12353   0.00062   0.00255   0.04007   0.04237  -3.08116
   D18       -0.01693   0.00062  -0.00008   0.01840   0.01831   0.00138
   D19        2.96671  -0.00017  -0.01833  -0.11387  -0.13217   2.83453
   D20       -0.17781   0.00009  -0.01837  -0.09232  -0.11062  -0.28843
   D21       -0.17619  -0.00063  -0.01900  -0.14622  -0.16529  -0.34147
   D22        2.96248  -0.00038  -0.01904  -0.12467  -0.14374   2.81875
   D23       -0.04681   0.00039  -0.00277   0.00384   0.00120  -0.04561
   D24        3.09015   0.00030  -0.00421  -0.00645  -0.01062   3.07953
   D25        3.12628   0.00045  -0.00038   0.02351   0.02323  -3.13368
   D26       -0.01995   0.00035  -0.00182   0.01322   0.01140  -0.00855
   D27        0.03882  -0.00056   0.00154  -0.01188  -0.01045   0.02837
   D28       -3.11497  -0.00152  -0.00263  -0.06932  -0.07108   3.09713
   D29       -3.09772  -0.00050   0.00313  -0.00081   0.00190  -3.09582
   D30        0.03167  -0.00145  -0.00105  -0.05825  -0.05873  -0.02706
   D31       -3.10303  -0.00056   0.00264   0.00332   0.00586  -3.09718
   D32        0.03377  -0.00064   0.00114  -0.00719  -0.00595   0.02782
   D33        0.21054  -0.00062  -0.02622  -0.18843  -0.21475  -0.00422
   D34       -2.96620  -0.00277  -0.00237  -0.13547  -0.13795  -3.10415
   D35       -2.91856   0.00043  -0.02194  -0.12933  -0.15115  -3.06971
   D36        0.18789  -0.00173   0.00191  -0.07637  -0.07436   0.11354
   D37       -0.02266  -0.00055  -0.00142  -0.02080  -0.02227  -0.04493
   D38        3.12183  -0.00080  -0.00139  -0.04215  -0.04350   3.07833
         Item               Value     Threshold  Converged?
 Maximum Force            0.010707     0.000450     NO 
 RMS     Force            0.002822     0.000300     NO 
 Maximum Displacement     0.453471     0.001800     NO 
 RMS     Displacement     0.095931     0.001200     NO 
 Predicted change in Energy=-1.907145D-03
 Lowest energy point so far.  Saving SCF results.
 GradGradGradGradGradGradGradGradGradGradGradGradGradGradGradGradGradGrad

 Leave Link  103 at Wed May 31 23:07:29 2023, MaxMem=  2684354560 cpu:               0.2 elap:               0.0
 (Enter /home/xut/apps/g16/l202.exe)
                          Input orientation:                          
 ---------------------------------------------------------------------
 Center     Atomic      Atomic             Coordinates (Angstroms)
 Number     Number       Type             X           Y           Z
 ---------------------------------------------------------------------
      1          6           0       -0.262734    1.423473   -0.035739
      2          6           0       -1.662448    1.175217   -0.000849
      3          6           0       -2.187333   -0.133460    0.039912
      4          6           0       -1.313968   -1.186644    0.057588
      5          6           0        0.115281   -0.935840    0.066137
      6          6           0        0.629615    0.371780    0.001891
      7          1           0       -2.327126    2.032756    0.002687
      8          1           0       -1.601178   -2.231441    0.118640
      9          6           0       -3.685965   -0.244635    0.103483
     10          8           0       -4.255209   -1.411037   -0.210558
     11          1           0       -3.628656   -2.090517   -0.497061
     12          8           0       -4.374273    0.696924    0.411236
     13          8           0        0.890877   -1.985309    0.155645
     14          1           0        1.838925   -1.752838    0.196688
     15          8           0        1.960752    0.554506    0.065001
     16          1           0        2.174892    1.504487    0.074972
     17          8           0        0.257981    2.649442   -0.050984
     18          1           0       -0.422160    3.342416   -0.028904
     19         24           0        4.132203   -0.432602    0.115088
 ---------------------------------------------------------------------
                    Distance matrix (angstroms):
                    1          2          3          4          5
     1  C    0.000000
     2  C    1.421987   0.000000
     3  C    2.476660   1.410603   0.000000
     4  C    2.815407   2.388146   1.368312   0.000000
     5  C    2.391576   2.760683   2.438552   1.451113   0.000000
     6  C    1.379769   2.428801   2.862152   2.491848   1.406605
     7  H    2.152769   1.084981   2.171041   3.375507   3.844729
     8  H    3.895339   3.409304   2.179748   1.085273   2.151179
     9  C    3.810574   2.474164   1.504094   2.552617   3.863759
    10  O    4.899476   3.668119   2.443573   2.961951   4.404947
    11  H    4.887778   3.844115   2.489141   2.546056   3.958224
    12  O    4.199097   2.784344   2.368570   3.610867   4.789688
    13  O    3.603782   4.066065   3.594178   2.347088   1.308031
    14  H    3.815750   4.568603   4.342547   3.206346   1.911930
    15  O    2.389381   3.676574   4.204823   3.708834   2.372108
    16  H    2.441484   3.852187   4.659733   4.406204   3.193317
    17  O    1.332057   2.421549   3.705721   4.147092   3.590032
    18  H    1.925566   2.497169   3.899011   4.616837   4.312928
    19  Cr   4.773179   6.014691   6.327059   5.498424   4.048618
                    6          7          8          9         10
     6  C    0.000000
     7  H    3.391336   0.000000
     8  H    3.430282   4.327104   0.000000
     9  C    4.360564   2.653887   2.879924   0.000000
    10  O    5.204333   3.952555   2.797377   1.335348   0.000000
    11  H    4.944162   4.352598   2.123585   1.941962   0.967650
    12  O    5.031121   2.478341   4.043636   1.206240   2.200978
    13  O    2.376503   5.150125   2.504453   4.896952   5.190963
    14  H    2.452423   5.632436   3.474113   5.727806   6.117283
    15  O    1.345101   4.535968   4.522358   5.703115   6.525141
    16  H    1.917354   4.533482   5.312040   6.116362   7.065976
    17  O    2.308387   2.658187   5.225731   4.894308   6.073042
    18  H    3.151485   2.311948   5.699099   4.851483   6.109057
    19  Cr   3.595548   6.914735   6.008951   7.820436   8.450566
                   11         12         13         14         15
    11  H    0.000000
    12  O    3.025025   0.000000
    13  O    4.567633   5.914516   0.000000
    14  H    5.521752   6.682155   0.976997   0.000000
    15  O    6.209150   6.346078   2.757446   2.314308   0.000000
    16  H    6.850726   6.607329   3.719393   3.276867   0.973868
    17  O    6.145904   5.048143   4.682326   4.684101   2.702155
    18  H    6.325942   4.776144   5.490244   5.578979   3.668723
    19  Cr   7.959544   8.586249   3.594265   2.647415   2.385810
                   16         17         18         19
    16  H    0.000000
    17  O    2.236367   0.000000
    18  H    3.183308   0.971232   0.000000
    19  Cr   2.754086   4.953400   5.917239   0.000000
 Stoichiometry    C7H6CrO5(3+,4)
 Framework group  C1[X(C7H6CrO5)]
 Deg. of freedom    51
 Full point group                 C1      NOp   1
 RotChk:  IX=0 Diff= 3.19D-02
 Largest Abelian subgroup         C1      NOp   1
 Largest concise Abelian subgroup C1      NOp   1
                         Standard orientation:                         
 ---------------------------------------------------------------------
 Center     Atomic      Atomic             Coordinates (Angstroms)
 Number     Number       Type             X           Y           Z
 ---------------------------------------------------------------------
      1          6           0       -0.292144    1.443828   -0.093499
      2          6           0       -1.687823    1.174860   -0.051266
      3          6           0       -2.193105   -0.141505   -0.010352
      4          6           0       -1.304211   -1.181713    0.000158
      5          6           0        0.121208   -0.909852    0.001203
      6          6           0        0.615823    0.405350   -0.063139
      7          1           0       -2.365050    2.022483   -0.042158
      8          1           0       -1.575626   -2.230760    0.060590
      9          6           0       -3.689550   -0.274926    0.061411
     10          8           0       -4.243292   -1.448958   -0.251916
     11          1           0       -3.608412   -2.118523   -0.543392
     12          8           0       -4.389922    0.655733    0.375044
     13          8           0        0.912696   -1.947936    0.084102
     14          1           0        1.857428   -1.701577    0.120308
     15          8           0        1.944454    0.607580   -0.007128
     16          1           0        2.144609    1.560597    0.003670
     17          8           0        0.210332    2.677380   -0.109052
     18          1           0       -0.479822    3.360189   -0.081664
     19         24           0        4.130481   -0.347460    0.028631
 ---------------------------------------------------------------------
 Rotational constants (GHZ):           1.5137638           0.2702127           0.2301539
 Leave Link  202 at Wed May 31 23:07:29 2023, MaxMem=  2684354560 cpu:               0.1 elap:               0.0
 (Enter /home/xut/apps/g16/l301.exe)
 Basis read from rwf:  (5D, 7F)
 Pseudo-potential data read from rwf file.
 There are   342 symmetry adapted cartesian basis functions of A   symmetry.
 There are   328 symmetry adapted basis functions of A   symmetry.
   328 basis functions,   538 primitive gaussians,   342 cartesian basis functions
    51 alpha electrons       48 beta electrons
       nuclear repulsion energy       826.8341614573 Hartrees.
 IExCor= 4336 DFT=T Ex+Corr=M062X ExCW=0 ScaHFX=  0.540000
 ScaDFX=  1.000000  1.000000  1.000000  1.000000 ScalE2=  1.000000  1.000000
 IRadAn=      5 IRanWt=     -1 IRanGd=            0 ICorTp=0 IEmpDi=  4
 NAtoms=   19 NActive=   19 NUniq=   19 SFac= 1.00D+00 NAtFMM=   60 NAOKFM=F Big=F
 Integral buffers will be    131072 words long.
 Raffenetti 2 integral format.
 Two-electron integral symmetry is turned on.
 No density basis found on file   724.
 ------------------------------------------------------------------------------
 Polarizable Continuum Model (PCM)
 =================================
 Model                : PCM.
 Atomic radii         : SMD-Coulomb.
 Polarization charges : Total charges.
 Charge compensation  : None.
 Solution method      : On-the-fly selection.
 Cavity type          : VdW (van der Waals Surface) (Alpha=1.000).
 Cavity algorithm     : GePol (No added spheres)
                        Default sphere list used, NSphG=   19.
                        Lebedev-Laikov grids with approx.  5.0 points / Ang**2.
                        Smoothing algorithm: York/Karplus (Gamma=1.0000).
                        Polarization charges: spherical gaussians, with
                                              point-specific exponents (IZeta= 3).
                        Self-potential: point-specific (ISelfS= 7).
                        Self-field    : sphere-specific E.n sum rule (ISelfD= 2).
 1st derivatives      : Analytical E(r).r(x)/FMM algorithm (CHGder, D1EAlg=3).
                        Cavity 1st derivative terms included.
 Solvent              : Water, Eps=  78.355300 Eps(inf)=   1.777849
 ------------------------------------------------------------------------------
 Spheres list:
 ISph  on   Nord     Re0    Alpha      Xe            Ye            Ze
    1   C      1    1.8500  1.000     -0.292144      1.443828     -0.093499
    2   C      2    1.8500  1.000     -1.687823      1.174860     -0.051266
    3   C      3    1.8500  1.000     -2.193105     -0.141505     -0.010352
    4   C      4    1.8500  1.000     -1.304211     -1.181713      0.000158
    5   C      5    1.8500  1.000      0.121208     -0.909852      0.001203
    6   C      6    1.8500  1.000      0.615823      0.405350     -0.063139
    7   H      7    1.2000  1.000     -2.365050      2.022483     -0.042158
    8   H      8    1.2000  1.000     -1.575626     -2.230760      0.060590
    9   C      9    1.8500  1.000     -3.689550     -0.274926      0.061411
   10   O     10    1.5200  1.000     -4.243292     -1.448958     -0.251916
   11   H     11    1.2000  1.000     -3.608412     -2.118523     -0.543392
   12   O     12    1.5200  1.000     -4.389922      0.655733      0.375044
   13   O     13    1.5200  1.000      0.912696     -1.947936      0.084102
   14   H     14    1.2000  1.000      1.857428     -1.701577      0.120308
   15   O     15    1.5200  1.000      1.944454      0.607580     -0.007128
   16   H     16    1.2000  1.000      2.144609      1.560597      0.003670
   17   O     17    1.5200  1.000      0.210332      2.677380     -0.109052
   18   H     18    1.2000  1.000     -0.479822      3.360189     -0.081664
   19  Cr     19    1.5115  1.000      4.130481     -0.347460      0.028631
 ------------------------------------------------------------------------------
 GePol: Number of generator spheres                  =      19
 GePol: Total number of spheres                      =      19
 GePol: Number of exposed spheres                    =      19 (100.00%)
 GePol: Number of points                             =    1495
 GePol: Average weight of points                     =       0.13
 GePol: Minimum weight of points                     =   0.99D-11
 GePol: Maximum weight of points                     =    0.21991
 GePol: Number of points with low weight             =      76
 GePol: Fraction of low-weight points (<1% of avg)   =       5.08%
 GePol: Cavity surface area                          =    191.016 Ang**2
 GePol: Cavity volume                                =    156.449 Ang**3
 ------------------------------------------------------------------------------
 Atomic radii for non-electrostatic terms: SMD-CDS.
 ------------------------------------------------------------------------------
 PCM non-electrostatic energy =         0.0105118597 Hartrees.
 Nuclear repulsion after PCM non-electrostatic terms =      826.8446733170 Hartrees.
 Leave Link  301 at Wed May 31 23:07:29 2023, MaxMem=  2684354560 cpu:               0.5 elap:               0.1
 (Enter /home/xut/apps/g16/l302.exe)
 NPDir=0 NMtPBC=     1 NCelOv=     1 NCel=       1 NClECP=     1 NCelD=      1
         NCelK=      1 NCelE2=     1 NClLst=     1 CellRange=     0.0.
 One-electron integrals computed using PRISM.
 One-electron integral symmetry used in STVInt
   1 Symmetry operations used in ECPInt.
 ECPInt:  NShTT=    6105 NPrTT=   23469 LenC2=    5789 LenP2D=   15734.
 LDataN:  DoStor=T MaxTD1= 4 Len=   56
 NBasis=   328 RedAO= T EigKep=  1.88D-06  NBF=   328
 NBsUse=   327 1.00D-06 EigRej=  6.05D-07 NBFU=   327
 Precomputing XC quadrature grid using
 IXCGrd= 4 IRadAn=           5 IRanWt=          -1 IRanGd=           0 AccXCQ= 0.00D+00.
 Generated NRdTot=       0 NPtTot=           0 NUsed=           0 NTot=          32
 NSgBfM=   342   342   342   342   342 MxSgAt=    19 MxSgA2=    19.
 Leave Link  302 at Wed May 31 23:07:29 2023, MaxMem=  2684354560 cpu:               2.2 elap:               0.2
 (Enter /home/xut/apps/g16/l303.exe)
 DipDrv:  MaxL=1.
 Leave Link  303 at Wed May 31 23:07:29 2023, MaxMem=  2684354560 cpu:               0.3 elap:               0.0
 (Enter /home/xut/apps/g16/l401.exe)
 Initial guess from the checkpoint file:  "149-91-7-para15-Cr.chk"
 B after Tr=    -0.000000   -0.000000   -0.000000
         Rot=    0.999995   -0.000091   -0.000084   -0.003169 Ang=  -0.36 deg.
 Guess basis will be translated and rotated to current coordinates.
 JPrj=2 DoOrth=T DoCkMO=T.
 Initial guess <Sx>= 0.0000 <Sy>= 0.0000 <Sz>= 1.5000 <S**2>= 4.7542 S= 1.7370
 Generating alternative initial guess.
 ExpMin= 1.90D-02 ExpMax= 8.59D+03 ExpMxC= 1.30D+03 IAcc=3 IRadAn=         5 AccDes= 0.00D+00
 Harris functional with IExCor= 1009 and IRadAn=       5 diagonalized for initial guess.
 HarFok:  IExCor= 1009 AccDes= 0.00D+00 IRadAn=         5 IDoV= 1 UseB2=F ITyADJ=14
 ICtDFT=  3500011 ScaDFX=  1.000000  1.000000  1.000000  1.000000
 FoFCou: FMM=F IPFlag=           0 FMFlag=      100000 FMFlg1=           0
         NFxFlg=           0 DoJE=T BraDBF=F KetDBF=T FulRan=T
         wScrn=  0.000000 ICntrl=       500 IOpCl=  0 I1Cent=   200000004 NGrid=           0
         NMat0=    1 NMatS0=      1 NMatT0=    0 NMatD0=    1 NMtDS0=    0 NMtDT0=    0
 Petite list used in FoFCou.
 Harris En= -732.136925673762    
 Leave Link  401 at Wed May 31 23:07:30 2023, MaxMem=  2684354560 cpu:              10.7 elap:               1.1
 (Enter /home/xut/apps/g16/l502.exe)
 Integral symmetry usage will be decided dynamically.
 UHF open shell SCF:
 Using DIIS extrapolation, IDIIS=  1040.
 NGot=  2684354560 LenX=  2684113999 LenY=  2683996594
 Requested convergence on RMS density matrix=1.00D-05 within 128 cycles.
 Requested convergence on MAX density matrix=1.00D-03.
 Requested convergence on             energy=1.00D-03.
 No special actions if energy rises.
 Fock matrices will be formed incrementally for  20 cycles.

 Cycle   1  Pass 1  IDiag  1:
 FoFJK:  IHMeth= 1 ICntrl=       0 DoSepK=F KAlg= 0 I1Cent=           0 FoldK=F
 IRaf= 910000000 NMat=       1 IRICut=       1 DoRegI=T DoRafI=F ISym2E= 0 IDoP0=0 IntGTp=1.
 FoFCou: FMM=F IPFlag=           0 FMFlag=      100000 FMFlg1=           0
         NFxFlg=           0 DoJE=F BraDBF=F KetDBF=F FulRan=T
         wScrn=  0.000000 ICntrl=         0 IOpCl=  1 I1Cent=           0 NGrid=           0
         NMat0=    1 NMatS0=      1 NMatT0=    0 NMatD0=    1 NMtDS0=    0 NMtDT0=    0
 Symmetry not used in FoFCou.
 Inv3:  Mode=1 IEnd=     6705075.
 Iteration    1 A*A^-1 deviation from unit magnitude is 2.89D-15 for    362.
 Iteration    1 A*A^-1 deviation from orthogonality  is 1.67D-15 for   1279    279.
 Iteration    1 A^-1*A deviation from unit magnitude is 3.11D-15 for    228.
 Iteration    1 A^-1*A deviation from orthogonality  is 1.26D-15 for    652    126.
 E= -732.174982606205    
 DIIS: error= 6.81D-03 at cycle   1 NSaved=   1.
 NSaved= 1 IEnMin= 1 EnMin= -732.174982606205     IErMin= 1 ErrMin= 6.81D-03
 ErrMax= 6.81D-03  0.00D+00 EMaxC= 1.00D-01 BMatC= 1.13D-01 BMatP= 1.13D-01
 IDIUse=3 WtCom= 9.32D-01 WtEn= 6.81D-02
 Coeff-Com:  0.100D+01
 Coeff-En:   0.100D+01
 Coeff:      0.100D+01
 Gap=     0.461 Goal=   None    Shift=    0.000
 Gap=     0.452 Goal=   None    Shift=    0.000
 GapD=    0.452 DampG=2.000 DampE=1.000 DampFc=2.0000 IDamp=-1.
 RMSDP=2.14D-02 MaxDP=2.60D+00              OVMax= 4.75D-02

 Cycle   2  Pass 1  IDiag  1:
 RMSU=  1.55D-02    CP:  8.18D-01
 E= -732.220240700451     Delta-E=       -0.045258094246 Rises=F Damp=F
 DIIS: error= 1.98D-03 at cycle   2 NSaved=   2.
 NSaved= 2 IEnMin= 2 EnMin= -732.220240700451     IErMin= 2 ErrMin= 1.98D-03
 ErrMax= 1.98D-03  0.00D+00 EMaxC= 1.00D-01 BMatC= 3.60D-03 BMatP= 1.13D-01
 IDIUse=3 WtCom= 9.80D-01 WtEn= 1.98D-02
 Coeff-Com: -0.128D+00 0.113D+01
 Coeff-En:   0.000D+00 0.100D+01
 Coeff:     -0.126D+00 0.113D+01
 Gap=     0.276 Goal=   None    Shift=    0.000
 Gap=     0.147 Goal=   None    Shift=    0.000
 RMSDP=2.01D-03 MaxDP=2.49D-01 DE=-4.53D-02 OVMax= 1.40D-02

 Cycle   3  Pass 1  IDiag  1:
 RMSU=  8.66D-04    CP:  8.01D-01  1.08D+00
 E= -732.222055451363     Delta-E=       -0.001814750911 Rises=F Damp=F
 DIIS: error= 7.56D-04 at cycle   3 NSaved=   3.
 NSaved= 3 IEnMin= 3 EnMin= -732.222055451363     IErMin= 3 ErrMin= 7.56D-04
 ErrMax= 7.56D-04  0.00D+00 EMaxC= 1.00D-01 BMatC= 9.68D-04 BMatP= 3.60D-03
 IDIUse=3 WtCom= 9.92D-01 WtEn= 7.56D-03
 Coeff-Com: -0.597D-01 0.408D+00 0.652D+00
 Coeff-En:   0.000D+00 0.000D+00 0.100D+01
 Coeff:     -0.592D-01 0.405D+00 0.655D+00
 Gap=     0.276 Goal=   None    Shift=    0.000
 Gap=     0.148 Goal=   None    Shift=    0.000
 RMSDP=3.01D-04 MaxDP=1.91D-02 DE=-1.81D-03 OVMax= 1.16D-02

 Cycle   4  Pass 1  IDiag  1:
 RMSU=  2.69D-04    CP:  8.03D-01  1.08D+00  1.04D+00
 E= -732.222256325494     Delta-E=       -0.000200874131 Rises=F Damp=F
 DIIS: error= 4.09D-04 at cycle   4 NSaved=   4.
 NSaved= 4 IEnMin= 4 EnMin= -732.222256325494     IErMin= 4 ErrMin= 4.09D-04
 ErrMax= 4.09D-04  0.00D+00 EMaxC= 1.00D-01 BMatC= 2.88D-04 BMatP= 9.68D-04
 IDIUse=3 WtCom= 9.96D-01 WtEn= 4.09D-03
 Coeff-Com:  0.227D-02-0.746D-01 0.337D+00 0.735D+00
 Coeff-En:   0.000D+00 0.000D+00 0.253D-01 0.975D+00
 Coeff:      0.226D-02-0.743D-01 0.336D+00 0.736D+00
 Gap=     0.276 Goal=   None    Shift=    0.000
 Gap=     0.148 Goal=   None    Shift=    0.000
 RMSDP=1.31D-04 MaxDP=1.49D-02 DE=-2.01D-04 OVMax= 5.89D-03

 Cycle   5  Pass 1  IDiag  1:
 RMSU=  9.04D-05    CP:  8.02D-01  1.08D+00  1.12D+00  8.92D-01
 E= -732.222338925460     Delta-E=       -0.000082599967 Rises=F Damp=F
 DIIS: error= 1.46D-04 at cycle   5 NSaved=   5.
 NSaved= 5 IEnMin= 5 EnMin= -732.222338925460     IErMin= 5 ErrMin= 1.46D-04
 ErrMax= 1.46D-04  0.00D+00 EMaxC= 1.00D-01 BMatC= 1.90D-05 BMatP= 2.88D-04
 IDIUse=3 WtCom= 9.99D-01 WtEn= 1.46D-03
 Coeff-Com:  0.450D-02-0.575D-01 0.107D+00 0.278D+00 0.668D+00
 Coeff-En:   0.000D+00 0.000D+00 0.000D+00 0.000D+00 0.100D+01
 Coeff:      0.450D-02-0.574D-01 0.107D+00 0.278D+00 0.668D+00
 Gap=     0.276 Goal=   None    Shift=    0.000
 Gap=     0.148 Goal=   None    Shift=    0.000
 RMSDP=5.33D-05 MaxDP=4.89D-03 DE=-8.26D-05 OVMax= 4.83D-03

 Cycle   6  Pass 1  IDiag  1:
 RMSU=  4.28D-05    CP:  8.02D-01  1.08D+00  1.12D+00  9.20D-01  1.33D+00
 E= -732.222357243890     Delta-E=       -0.000018318430 Rises=F Damp=F
 DIIS: error= 1.54D-04 at cycle   6 NSaved=   6.
 NSaved= 6 IEnMin= 6 EnMin= -732.222357243890     IErMin= 5 ErrMin= 1.46D-04
 ErrMax= 1.54D-04  0.00D+00 EMaxC= 1.00D-01 BMatC= 7.32D-06 BMatP= 1.90D-05
 IDIUse=3 WtCom= 9.99D-01 WtEn= 1.46D-03
 Coeff-Com:  0.113D-02-0.552D-02-0.194D-01-0.821D-01 0.161D+00 0.944D+00
 Coeff-En:   0.000D+00 0.000D+00 0.000D+00 0.000D+00 0.000D+00 0.100D+01
 Coeff:      0.113D-02-0.551D-02-0.193D-01-0.820D-01 0.161D+00 0.945D+00
 Gap=     0.276 Goal=   None    Shift=    0.000
 Gap=     0.148 Goal=   None    Shift=    0.000
 RMSDP=4.80D-05 MaxDP=6.87D-03 DE=-1.83D-05 OVMax= 7.32D-03

 Cycle   7  Pass 1  IDiag  1:
 RMSU=  2.51D-05    CP:  8.02D-01  1.08D+00  1.12D+00  9.32D-01  1.61D+00
                    CP:  1.67D+00
 E= -732.222377432610     Delta-E=       -0.000020188720 Rises=F Damp=F
 DIIS: error= 1.29D-04 at cycle   7 NSaved=   7.
 NSaved= 7 IEnMin= 7 EnMin= -732.222377432610     IErMin= 7 ErrMin= 1.29D-04
 ErrMax= 1.29D-04  0.00D+00 EMaxC= 1.00D-01 BMatC= 6.17D-06 BMatP= 7.32D-06
 IDIUse=3 WtCom= 9.99D-01 WtEn= 1.29D-03
 Coeff-Com: -0.143D-02 0.190D-01-0.208D-01-0.135D+00-0.261D+00 0.388D+00
 Coeff-Com:  0.101D+01
 Coeff-En:   0.000D+00 0.000D+00 0.000D+00 0.000D+00 0.000D+00 0.000D+00
 Coeff-En:   0.100D+01
 Coeff:     -0.143D-02 0.189D-01-0.208D-01-0.135D+00-0.261D+00 0.387D+00
 Coeff:      0.101D+01
 Gap=     0.276 Goal=   None    Shift=    0.000
 Gap=     0.148 Goal=   None    Shift=    0.000
 RMSDP=6.55D-05 MaxDP=8.96D-03 DE=-2.02D-05 OVMax= 8.30D-03

 Cycle   8  Pass 1  IDiag  1:
 RMSU=  1.59D-05    CP:  8.01D-01  1.08D+00  1.12D+00  9.29D-01  2.00D+00
                    CP:  2.61D+00  2.01D+00
 E= -732.222398461825     Delta-E=       -0.000021029215 Rises=F Damp=F
 DIIS: error= 1.12D-04 at cycle   8 NSaved=   8.
 NSaved= 8 IEnMin= 8 EnMin= -732.222398461825     IErMin= 8 ErrMin= 1.12D-04
 ErrMax= 1.12D-04  0.00D+00 EMaxC= 1.00D-01 BMatC= 4.06D-06 BMatP= 6.17D-06
 IDIUse=3 WtCom= 9.99D-01 WtEn= 1.12D-03
 Coeff-Com: -0.194D-02 0.156D-01 0.263D-01-0.160D-01-0.359D+00-0.483D+00
 Coeff-Com: -0.355D-01 0.185D+01
 Coeff-En:   0.000D+00 0.000D+00 0.000D+00 0.000D+00 0.000D+00 0.000D+00
 Coeff-En:   0.000D+00 0.100D+01
 Coeff:     -0.194D-02 0.156D-01 0.263D-01-0.159D-01-0.359D+00-0.482D+00
 Coeff:     -0.355D-01 0.185D+01
 Gap=     0.276 Goal=   None    Shift=    0.000
 Gap=     0.148 Goal=   None    Shift=    0.000
 RMSDP=1.30D-04 MaxDP=1.77D-02 DE=-2.10D-05 OVMax= 1.75D-02

 Cycle   9  Pass 1  IDiag  1:
 RMSU=  7.10D-05    CP:  8.01D-01  1.08D+00  1.11D+00  8.89D-01  2.71D+00
                    CP:  3.00D+00  3.00D+00  3.00D+00
 E= -732.222432975858     Delta-E=       -0.000034514033 Rises=F Damp=F
 DIIS: error= 7.01D-05 at cycle   9 NSaved=   9.
 NSaved= 9 IEnMin= 9 EnMin= -732.222432975858     IErMin= 9 ErrMin= 7.01D-05
 ErrMax= 7.01D-05  0.00D+00 EMaxC= 1.00D-01 BMatC= 2.59D-06 BMatP= 4.06D-06
 IDIUse=1 WtCom= 1.00D+00 WtEn= 0.00D+00
 Coeff-Com:  0.774D-03-0.136D-01 0.338D-01 0.927D-01 0.104D+00-0.281D+00
 Coeff-Com: -0.139D+01 0.877D+00 0.157D+01
 Coeff:      0.774D-03-0.136D-01 0.338D-01 0.927D-01 0.104D+00-0.281D+00
 Coeff:     -0.139D+01 0.877D+00 0.157D+01
 Gap=     0.277 Goal=   None    Shift=    0.000
 Gap=     0.148 Goal=   None    Shift=    0.000
 RMSDP=1.64D-04 MaxDP=2.28D-02 DE=-3.45D-05 OVMax= 2.13D-02

 Cycle  10  Pass 1  IDiag  1:
 RMSU=  7.15D-05    CP:  8.00D-01  1.08D+00  1.11D+00  8.32D-01  3.00D+00
                    CP:  3.00D+00  3.00D+00  3.00D+00  2.68D+00
 E= -732.222458987497     Delta-E=       -0.000026011639 Rises=F Damp=F
 DIIS: error= 3.69D-05 at cycle  10 NSaved=  10.
 NSaved=10 IEnMin=10 EnMin= -732.222458987497     IErMin=10 ErrMin= 3.69D-05
 ErrMax= 3.69D-05  0.00D+00 EMaxC= 1.00D-01 BMatC= 1.13D-06 BMatP= 2.59D-06
 IDIUse=1 WtCom= 1.00D+00 WtEn= 0.00D+00
 Coeff-Com:  0.632D-03-0.802D-02 0.779D-02 0.340D-01 0.110D+00 0.713D-02
 Coeff-Com: -0.592D+00 0.551D-01 0.585D+00 0.801D+00
 Coeff:      0.632D-03-0.802D-02 0.779D-02 0.340D-01 0.110D+00 0.713D-02
 Coeff:     -0.592D+00 0.551D-01 0.585D+00 0.801D+00
 Gap=     0.277 Goal=   None    Shift=    0.000
 Gap=     0.148 Goal=   None    Shift=    0.000
 RMSDP=3.55D-05 MaxDP=4.22D-03 DE=-2.60D-05 OVMax= 4.33D-03

 Cycle  11  Pass 1  IDiag  1:
 RMSU=  7.78D-06    CP:  8.00D-01  1.08D+00  1.10D+00  8.17D-01  3.00D+00
                    CP:  3.00D+00  3.00D+00  3.00D+00  3.00D+00  1.30D+00
 E= -732.222463378086     Delta-E=       -0.000004390589 Rises=F Damp=F
 DIIS: error= 3.53D-05 at cycle  11 NSaved=  11.
 NSaved=11 IEnMin=11 EnMin= -732.222463378086     IErMin=11 ErrMin= 3.53D-05
 ErrMax= 3.53D-05  0.00D+00 EMaxC= 1.00D-01 BMatC= 9.14D-07 BMatP= 1.13D-06
 IDIUse=1 WtCom= 1.00D+00 WtEn= 0.00D+00
 Coeff-Com: -0.129D-03 0.278D-02-0.739D-02-0.221D-01-0.176D-01 0.907D-01
 Coeff-Com:  0.282D+00-0.187D+00-0.417D+00 0.868D-01 0.119D+01
 Coeff:     -0.129D-03 0.278D-02-0.739D-02-0.221D-01-0.176D-01 0.907D-01
 Coeff:      0.282D+00-0.187D+00-0.417D+00 0.868D-01 0.119D+01
 Gap=     0.277 Goal=   None    Shift=    0.000
 Gap=     0.148 Goal=   None    Shift=    0.000
 RMSDP=1.98D-05 MaxDP=1.50D-03 DE=-4.39D-06 OVMax= 1.92D-03

 Cycle  12  Pass 1  IDiag  1:
 RMSU=  1.09D-05    CP:  8.00D-01  1.08D+00  1.10D+00  8.14D-01  3.00D+00
                    CP:  3.00D+00  3.00D+00  3.00D+00  3.00D+00  1.44D+00
                    CP:  2.54D+00
 E= -732.222467013182     Delta-E=       -0.000003635096 Rises=F Damp=F
 DIIS: error= 3.41D-05 at cycle  12 NSaved=  12.
 NSaved=12 IEnMin=12 EnMin= -732.222467013182     IErMin=12 ErrMin= 3.41D-05
 ErrMax= 3.41D-05  0.00D+00 EMaxC= 1.00D-01 BMatC= 8.37D-07 BMatP= 9.14D-07
 IDIUse=1 WtCom= 1.00D+00 WtEn= 0.00D+00
 Coeff-Com: -0.251D-03 0.334D-02-0.279D-02-0.164D-01-0.489D-01 0.214D-01
 Coeff-Com:  0.219D+00-0.108D-01-0.283D+00-0.354D+00 0.252D+00 0.122D+01
 Coeff:     -0.251D-03 0.334D-02-0.279D-02-0.164D-01-0.489D-01 0.214D-01
 Coeff:      0.219D+00-0.108D-01-0.283D+00-0.354D+00 0.252D+00 0.122D+01
 Gap=     0.277 Goal=   None    Shift=    0.000
 Gap=     0.148 Goal=   None    Shift=    0.000
 RMSDP=2.19D-05 MaxDP=1.70D-03 DE=-3.64D-06 OVMax= 2.27D-03

 Cycle  13  Pass 1  IDiag  1:
 RMSU=  1.09D-05    CP:  8.00D-01  1.08D+00  1.10D+00  8.11D-01  3.00D+00
                    CP:  3.00D+00  3.00D+00  3.00D+00  3.00D+00  1.58D+00
                    CP:  3.00D+00  2.12D+00
 E= -732.222471055129     Delta-E=       -0.000004041947 Rises=F Damp=F
 DIIS: error= 3.21D-05 at cycle  13 NSaved=  13.
 NSaved=13 IEnMin=13 EnMin= -732.222471055129     IErMin=13 ErrMin= 3.21D-05
 ErrMax= 3.21D-05  0.00D+00 EMaxC= 1.00D-01 BMatC= 7.85D-07 BMatP= 8.37D-07
 IDIUse=1 WtCom= 1.00D+00 WtEn= 0.00D+00
 Coeff-Com:  0.894D-04-0.166D-02 0.350D-02 0.115D-01 0.133D-01-0.426D-01
 Coeff-Com: -0.149D+00 0.684D-01 0.218D+00-0.146D-02-0.615D+00-0.392D-01
 Coeff-Com:  0.153D+01
 Coeff:      0.894D-04-0.166D-02 0.350D-02 0.115D-01 0.133D-01-0.426D-01
 Coeff:     -0.149D+00 0.684D-01 0.218D+00-0.146D-02-0.615D+00-0.392D-01
 Coeff:      0.153D+01
 Gap=     0.277 Goal=   None    Shift=    0.000
 Gap=     0.148 Goal=   None    Shift=    0.000
 RMSDP=2.61D-05 MaxDP=1.84D-03 DE=-4.04D-06 OVMax= 2.96D-03

 Cycle  14  Pass 1  IDiag  1:
 RMSU=  6.37D-06    CP:  8.00D-01  1.08D+00  1.10D+00  8.12D-01  3.00D+00
                    CP:  3.00D+00  3.00D+00  3.00D+00  3.00D+00  1.71D+00
                    CP:  3.00D+00  3.00D+00  2.66D+00
 E= -732.222476111330     Delta-E=       -0.000005056201 Rises=F Damp=F
 DIIS: error= 3.07D-05 at cycle  14 NSaved=  14.
 NSaved=14 IEnMin=14 EnMin= -732.222476111330     IErMin=14 ErrMin= 3.07D-05
 ErrMax= 3.07D-05  0.00D+00 EMaxC= 1.00D-01 BMatC= 7.59D-07 BMatP= 7.85D-07
 IDIUse=1 WtCom= 1.00D+00 WtEn= 0.00D+00
 Coeff-Com:  0.151D-03-0.210D-02 0.827D-03 0.134D-01 0.364D-01-0.405D-01
 Coeff-Com: -0.109D+00-0.903D-02 0.224D+00 0.217D+00-0.327D+00-0.945D+00
 Coeff-Com:  0.434D+00 0.151D+01
 Coeff:      0.151D-03-0.210D-02 0.827D-03 0.134D-01 0.364D-01-0.405D-01
 Coeff:     -0.109D+00-0.903D-02 0.224D+00 0.217D+00-0.327D+00-0.945D+00
 Coeff:      0.434D+00 0.151D+01
 Gap=     0.277 Goal=   None    Shift=    0.000
 Gap=     0.148 Goal=   None    Shift=    0.000
 RMSDP=3.18D-05 MaxDP=2.14D-03 DE=-5.06D-06 OVMax= 3.89D-03

 Cycle  15  Pass 1  IDiag  1:
 RMSU=  2.25D-05    CP:  8.00D-01  1.08D+00  1.10D+00  8.15D-01  3.00D+00
                    CP:  3.00D+00  3.00D+00  3.00D+00  3.00D+00  1.80D+00
                    CP:  3.00D+00  3.00D+00  3.00D+00  3.00D+00
 E= -732.222482698262     Delta-E=       -0.000006586932 Rises=F Damp=F
 DIIS: error= 2.91D-05 at cycle  15 NSaved=  15.
 NSaved=15 IEnMin=15 EnMin= -732.222482698262     IErMin=15 ErrMin= 2.91D-05
 ErrMax= 2.91D-05  0.00D+00 EMaxC= 1.00D-01 BMatC= 7.25D-07 BMatP= 7.59D-07
 IDIUse=1 WtCom= 1.00D+00 WtEn= 0.00D+00
 Coeff-Com:  0.512D-04-0.981D-04-0.402D-02 0.156D-02 0.240D-01 0.868D-03
 Coeff-Com:  0.107D+00-0.122D+00-0.500D-01 0.185D+00 0.502D+00-0.750D+00
 Coeff-Com: -0.165D+01 0.106D+01 0.170D+01
 Coeff:      0.512D-04-0.981D-04-0.402D-02 0.156D-02 0.240D-01 0.868D-03
 Coeff:      0.107D+00-0.122D+00-0.500D-01 0.185D+00 0.502D+00-0.750D+00
 Coeff:     -0.165D+01 0.106D+01 0.170D+01
 Gap=     0.277 Goal=   None    Shift=    0.000
 Gap=     0.148 Goal=   None    Shift=    0.000
 RMSDP=6.14D-05 MaxDP=4.18D-03 DE=-6.59D-06 OVMax= 7.51D-03

 Cycle  16  Pass 1  IDiag  1:
 RMSU=  2.65D-05    CP:  8.00D-01  1.08D+00  1.10D+00  8.23D-01  3.00D+00
                    CP:  3.00D+00  3.00D+00  3.00D+00  3.00D+00  1.94D+00
                    CP:  3.00D+00  3.00D+00  3.00D+00  3.00D+00  3.00D+00
 E= -732.222494912248     Delta-E=       -0.000012213987 Rises=F Damp=F
 DIIS: error= 2.81D-05 at cycle  16 NSaved=  16.
 NSaved=16 IEnMin=16 EnMin= -732.222494912248     IErMin=16 ErrMin= 2.81D-05
 ErrMax= 2.81D-05  0.00D+00 EMaxC= 1.00D-01 BMatC= 6.63D-07 BMatP= 7.25D-07
 IDIUse=1 WtCom= 1.00D+00 WtEn= 0.00D+00
 Coeff-Com: -0.112D-03 0.177D-02-0.243D-02-0.111D-01-0.251D-01 0.316D-01
 Coeff-Com:  0.133D+00-0.834D-01-0.198D+00-0.132D+00 0.457D+00 0.971D+00
 Coeff-Com: -0.830D+00-0.173D+01 0.216D+00 0.220D+01
 Coeff:     -0.112D-03 0.177D-02-0.243D-02-0.111D-01-0.251D-01 0.316D-01
 Coeff:      0.133D+00-0.834D-01-0.198D+00-0.132D+00 0.457D+00 0.971D+00
 Coeff:     -0.830D+00-0.173D+01 0.216D+00 0.220D+01
 Gap=     0.277 Goal=   None    Shift=    0.000
 Gap=     0.148 Goal=   None    Shift=    0.000
 RMSDP=1.04D-04 MaxDP=7.15D-03 DE=-1.22D-05 OVMax= 1.26D-02

 Cycle  17  Pass 1  IDiag  1:
 RMSU=  7.28D-05    CP:  7.99D-01  1.08D+00  1.10D+00  8.31D-01  3.00D+00
                    CP:  3.00D+00  3.00D+00  3.00D+00  3.00D+00  2.22D+00
                    CP:  3.00D+00  3.00D+00  3.00D+00  3.00D+00  3.00D+00
                    CP:  3.00D+00
 E= -732.222514012419     Delta-E=       -0.000019100171 Rises=F Damp=F
 DIIS: error= 3.17D-05 at cycle  17 NSaved=  17.
 NSaved=17 IEnMin=17 EnMin= -732.222514012419     IErMin=16 ErrMin= 2.81D-05
 ErrMax= 3.17D-05  0.00D+00 EMaxC= 1.00D-01 BMatC= 6.06D-07 BMatP= 6.63D-07
 IDIUse=1 WtCom= 1.00D+00 WtEn= 0.00D+00
 Coeff-Com: -0.583D-04 0.425D-03 0.130D-02-0.696D-03-0.173D-01-0.110D-01
 Coeff-Com:  0.212D-01 0.166D-01 0.223D-01-0.131D+00-0.246D+00 0.552D+00
 Coeff-Com:  0.767D+00-0.777D+00-0.842D+00 0.205D+00 0.144D+01
 Coeff:     -0.583D-04 0.425D-03 0.130D-02-0.696D-03-0.173D-01-0.110D-01
 Coeff:      0.212D-01 0.166D-01 0.223D-01-0.131D+00-0.246D+00 0.552D+00
 Coeff:      0.767D+00-0.777D+00-0.842D+00 0.205D+00 0.144D+01
 Gap=     0.277 Goal=   None    Shift=    0.000
 Gap=     0.148 Goal=   None    Shift=    0.000
 RMSDP=6.48D-05 MaxDP=4.50D-03 DE=-1.91D-05 OVMax= 7.79D-03

 Cycle  18  Pass 1  IDiag  1:
 RMSU=  3.34D-05    CP:  7.99D-01  1.08D+00  1.10D+00  8.41D-01  3.00D+00
                    CP:  3.00D+00  3.00D+00  3.00D+00  3.00D+00  2.31D+00
                    CP:  3.00D+00  3.00D+00  3.00D+00  3.00D+00  3.00D+00
                    CP:  3.00D+00  1.73D+00
 E= -732.222525286647     Delta-E=       -0.000011274228 Rises=F Damp=F
 DIIS: error= 3.33D-05 at cycle  18 NSaved=  18.
 NSaved=18 IEnMin=18 EnMin= -732.222525286647     IErMin=16 ErrMin= 2.81D-05
 ErrMax= 3.33D-05  0.00D+00 EMaxC= 1.00D-01 BMatC= 5.74D-07 BMatP= 6.06D-07
 IDIUse=1 WtCom= 1.00D+00 WtEn= 0.00D+00
 Coeff-Com:  0.115D-03-0.204D-02 0.370D-02 0.146D-01 0.193D-01-0.545D-01
 Coeff-Com: -0.152D+00 0.687D-01 0.266D+00 0.670D-01-0.587D+00-0.437D+00
 Coeff-Com:  0.111D+01 0.881D+00-0.619D+00-0.158D+01 0.658D+00 0.134D+01
 Coeff:      0.115D-03-0.204D-02 0.370D-02 0.146D-01 0.193D-01-0.545D-01
 Coeff:     -0.152D+00 0.687D-01 0.266D+00 0.670D-01-0.587D+00-0.437D+00
 Coeff:      0.111D+01 0.881D+00-0.619D+00-0.158D+01 0.658D+00 0.134D+01
 Gap=     0.277 Goal=   None    Shift=    0.000
 Gap=     0.148 Goal=   None    Shift=    0.000
 RMSDP=6.50D-05 MaxDP=4.56D-03 DE=-1.13D-05 OVMax= 7.79D-03

 Cycle  19  Pass 1  IDiag  1:
 RMSU=  6.76D-06    CP:  7.99D-01  1.07D+00  1.09D+00  8.49D-01  3.00D+00
                    CP:  3.00D+00  3.00D+00  3.00D+00  3.00D+00  2.45D+00
                    CP:  3.00D+00  3.00D+00  3.00D+00  3.00D+00  3.00D+00
                    CP:  3.00D+00  2.46D+00  1.96D+00
 E= -732.222536164055     Delta-E=       -0.000010877408 Rises=F Damp=F
 DIIS: error= 3.45D-05 at cycle  19 NSaved=  19.
 NSaved=19 IEnMin=19 EnMin= -732.222536164055     IErMin=16 ErrMin= 2.81D-05
 ErrMax= 3.45D-05  0.00D+00 EMaxC= 1.00D-01 BMatC= 5.49D-07 BMatP= 5.74D-07
 IDIUse=1 WtCom= 1.00D+00 WtEn= 0.00D+00
 Coeff-Com: -0.908D-05 0.131D-03-0.449D-03-0.170D-03 0.269D-02 0.120D-03
 Coeff-Com:  0.150D-01-0.195D-02-0.648D-02 0.163D-01 0.213D-01-0.212D+00
 Coeff-Com: -0.183D+00 0.448D+00 0.232D+00-0.343D+00-0.423D+00 0.241D+00
 Coeff-Com:  0.119D+01
 Coeff:     -0.908D-05 0.131D-03-0.449D-03-0.170D-03 0.269D-02 0.120D-03
 Coeff:      0.150D-01-0.195D-02-0.648D-02 0.163D-01 0.213D-01-0.212D+00
 Coeff:     -0.183D+00 0.448D+00 0.232D+00-0.343D+00-0.423D+00 0.241D+00
 Coeff:      0.119D+01
 Gap=     0.277 Goal=   None    Shift=    0.000
 Gap=     0.148 Goal=   None    Shift=    0.000
 RMSDP=3.36D-05 MaxDP=2.49D-03 DE=-1.09D-05 OVMax= 3.94D-03

 Cycle  20  Pass 1  IDiag  1:
 RMSU=  4.50D-06    CP:  7.99D-01  1.07D+00  1.09D+00  8.56D-01  3.00D+00
                    CP:  3.00D+00  3.00D+00  3.00D+00  3.00D+00  2.49D+00
                    CP:  3.00D+00  3.00D+00  3.00D+00  3.00D+00  3.00D+00
                    CP:  3.00D+00  2.84D+00  2.47D+00  1.36D+00
 E= -732.222541906425     Delta-E=       -0.000005742369 Rises=F Damp=F
 DIIS: error= 3.45D-05 at cycle  20 NSaved=  20.
 NSaved=20 IEnMin=20 EnMin= -732.222541906425     IErMin=16 ErrMin= 2.81D-05
 ErrMax= 3.45D-05  0.00D+00 EMaxC= 1.00D-01 BMatC= 5.42D-07 BMatP= 5.49D-07
 IDIUse=1 WtCom= 1.00D+00 WtEn= 0.00D+00
 Coeff-Com:  0.326D-04-0.448D-03 0.906D-03 0.959D-03 0.464D-02 0.955D-02
 Coeff-Com: -0.604D-01 0.223D-01 0.267D-01 0.200D-01 0.391D-01 0.619D-01
 Coeff-Com: -0.152D+00-0.227D+00 0.738D-01 0.452D+00-0.137D+00-0.506D+00
 Coeff-Com:  0.504D-02 0.137D+01
 Coeff:      0.326D-04-0.448D-03 0.906D-03 0.959D-03 0.464D-02 0.955D-02
 Coeff:     -0.604D-01 0.223D-01 0.267D-01 0.200D-01 0.391D-01 0.619D-01
 Coeff:     -0.152D+00-0.227D+00 0.738D-01 0.452D+00-0.137D+00-0.506D+00
 Coeff:      0.504D-02 0.137D+01
 Gap=     0.277 Goal=   None    Shift=    0.000
 Gap=     0.148 Goal=   None    Shift=    0.000
 RMSDP=2.31D-05 MaxDP=1.90D-03 DE=-5.74D-06 OVMax= 2.59D-03

 Cycle  21  Pass 1  IDiag  1:
 Restarting incremental Fock formation.
 E= -732.222546005027     Delta-E=       -0.000004098603 Rises=F Damp=F
 DIIS: error= 3.42D-05 at cycle  21 NSaved=  20.
 NSaved=20 IEnMin=20 EnMin= -732.222546005027     IErMin=15 ErrMin= 2.81D-05
 ErrMax= 3.42D-05  0.00D+00 EMaxC= 1.00D-01 BMatC= 5.38D-07 BMatP= 5.42D-07
 IDIUse=1 WtCom= 1.00D+00 WtEn= 0.00D+00
 Coeff-Com:  0.371D-03-0.968D-03-0.500D-02-0.618D-02 0.243D-01 0.338D-01
 Coeff-Com: -0.173D-01-0.929D-01-0.210D-01 0.160D+00 0.140D+00-0.607D-01
 Coeff-Com: -0.332D+00-0.988D-01 0.377D+00 0.515D+00-0.647D+00-0.158D+01
 Coeff-Com:  0.911D+00 0.170D+01
 Coeff:      0.371D-03-0.968D-03-0.500D-02-0.618D-02 0.243D-01 0.338D-01
 Coeff:     -0.173D-01-0.929D-01-0.210D-01 0.160D+00 0.140D+00-0.607D-01
 Coeff:     -0.332D+00-0.988D-01 0.377D+00 0.515D+00-0.647D+00-0.158D+01
 Coeff:      0.911D+00 0.170D+01
 Gap=     0.277 Goal=   None    Shift=    0.000
 Gap=     0.148 Goal=   None    Shift=    0.000
 RMSDP=4.52D-05 MaxDP=3.85D-03 DE=-4.10D-06 OVMax= 5.02D-03

 Cycle  22  Pass 1  IDiag  1:
 RMSU=  4.39D-05    CP:  1.00D+00
 E= -732.222554169355     Delta-E=       -0.000008164328 Rises=F Damp=F
 DIIS: error= 3.34D-05 at cycle  22 NSaved=  20.
 NSaved=20 IEnMin=20 EnMin= -732.222554169355     IErMin=14 ErrMin= 2.81D-05
 ErrMax= 3.34D-05  0.00D+00 EMaxC= 1.00D-01 BMatC= 5.28D-07 BMatP= 5.38D-07
 IDIUse=1 WtCom= 1.00D+00 WtEn= 0.00D+00
 Coeff-Com: -0.426D-04 0.146D-02-0.111D-02-0.168D-01 0.379D-01 0.818D-02
 Coeff-Com: -0.151D-01-0.357D-01-0.114D+00-0.214D+00 0.507D+00 0.503D+00
 Coeff-Com: -0.259D+00-0.107D+01 0.505D+00 0.990D+00-0.475D+00-0.232D+01
 Coeff-Com:  0.176D+00 0.280D+01
 Coeff:     -0.426D-04 0.146D-02-0.111D-02-0.168D-01 0.379D-01 0.818D-02
 Coeff:     -0.151D-01-0.357D-01-0.114D+00-0.214D+00 0.507D+00 0.503D+00
 Coeff:     -0.259D+00-0.107D+01 0.505D+00 0.990D+00-0.475D+00-0.232D+01
 Coeff:      0.176D+00 0.280D+01
 Gap=     0.277 Goal=   None    Shift=    0.000
 Gap=     0.148 Goal=   None    Shift=    0.000
 RMSDP=1.05D-04 MaxDP=9.04D-03 DE=-8.16D-06 OVMax= 1.15D-02

 Cycle  23  Pass 1  IDiag  1:
 RMSU=  1.48D-05    CP:  9.99D-01  3.00D+00
 E= -732.222573049761     Delta-E=       -0.000018880406 Rises=F Damp=F
 DIIS: error= 3.13D-05 at cycle  23 NSaved=  20.
 NSaved=20 IEnMin=20 EnMin= -732.222573049761     IErMin=13 ErrMin= 2.81D-05
 ErrMax= 3.13D-05  0.00D+00 EMaxC= 1.00D-01 BMatC= 5.14D-07 BMatP= 5.28D-07
 IDIUse=1 WtCom= 1.00D+00 WtEn= 0.00D+00
 Coeff-Com:  0.129D-02 0.253D-02-0.992D-02 0.808D-02 0.162D-01 0.492D-02
 Coeff-Com: -0.193D-02-0.205D-01-0.225D+00-0.111D-01 0.458D+00 0.202D+00
 Coeff-Com: -0.552D+00-0.511D+00 0.782D+00 0.121D+01-0.180D+01-0.968D+00
 Coeff-Com:  0.125D+01 0.116D+01
 Coeff:      0.129D-02 0.253D-02-0.992D-02 0.808D-02 0.162D-01 0.492D-02
 Coeff:     -0.193D-02-0.205D-01-0.225D+00-0.111D-01 0.458D+00 0.202D+00
 Coeff:     -0.552D+00-0.511D+00 0.782D+00 0.121D+01-0.180D+01-0.968D+00
 Coeff:      0.125D+01 0.116D+01
 Gap=     0.277 Goal=   None    Shift=    0.000
 Gap=     0.148 Goal=   None    Shift=    0.000
 RMSDP=7.13D-05 MaxDP=6.10D-03 DE=-1.89D-05 OVMax= 7.74D-03

 Cycle  24  Pass 1  IDiag  1:
 RMSU=  4.19D-05    CP:  9.99D-01  3.00D+00  3.00D+00
 E= -732.222585668136     Delta-E=       -0.000012618374 Rises=F Damp=F
 DIIS: error= 2.98D-05 at cycle  24 NSaved=  20.
 NSaved=20 IEnMin=20 EnMin= -732.222585668136     IErMin=12 ErrMin= 2.81D-05
 ErrMax= 2.98D-05  0.00D+00 EMaxC= 1.00D-01 BMatC= 5.06D-07 BMatP= 5.14D-07
 IDIUse=1 WtCom= 1.00D+00 WtEn= 0.00D+00
 Coeff-Com:  0.341D-02 0.953D-02 0.810D-02-0.555D-02-0.435D-01 0.141D-01
 Coeff-Com:  0.185D+00-0.624D-01-0.565D+00 0.747D-01 0.501D+00 0.334D+00
 Coeff-Com: -0.869D+00-0.954D-01 0.129D+01-0.110D+00-0.517D+00-0.600D+00
 Coeff-Com:  0.227D+00 0.122D+01
 Coeff:      0.341D-02 0.953D-02 0.810D-02-0.555D-02-0.435D-01 0.141D-01
 Coeff:      0.185D+00-0.624D-01-0.565D+00 0.747D-01 0.501D+00 0.334D+00
 Coeff:     -0.869D+00-0.954D-01 0.129D+01-0.110D+00-0.517D+00-0.600D+00
 Coeff:      0.227D+00 0.122D+01
 Gap=     0.277 Goal=   None    Shift=    0.000
 Gap=     0.148 Goal=   None    Shift=    0.000
 RMSDP=4.63D-05 MaxDP=3.90D-03 DE=-1.26D-05 OVMax= 4.94D-03

 Cycle  25  Pass 1  IDiag  1:
 RMSU=  1.06D-05    CP:  9.99D-01  3.00D+00  3.00D+00  2.04D+00
 E= -732.222593778623     Delta-E=       -0.000008110487 Rises=F Damp=F
 DIIS: error= 2.93D-05 at cycle  25 NSaved=  20.
 NSaved=20 IEnMin=20 EnMin= -732.222593778623     IErMin=11 ErrMin= 2.81D-05
 ErrMax= 2.93D-05  0.00D+00 EMaxC= 1.00D-01 BMatC= 4.99D-07 BMatP= 5.06D-07
 IDIUse=1 WtCom= 1.00D+00 WtEn= 0.00D+00
 Coeff-Com:  0.373D-02-0.578D-02 0.179D-03-0.670D-02 0.638D-02 0.455D-01
 Coeff-Com:  0.315D-01-0.102D+00-0.116D+00 0.397D-01 0.205D+00-0.314D-01
 Coeff-Com: -0.128D+00-0.427D-01 0.110D+00 0.234D+00-0.223D+00-0.669D+00
 Coeff-Com:  0.162D+00 0.149D+01
 Coeff:      0.373D-02-0.578D-02 0.179D-03-0.670D-02 0.638D-02 0.455D-01
 Coeff:      0.315D-01-0.102D+00-0.116D+00 0.397D-01 0.205D+00-0.314D-01
 Coeff:     -0.128D+00-0.427D-01 0.110D+00 0.234D+00-0.223D+00-0.669D+00
 Coeff:      0.162D+00 0.149D+01
 Gap=     0.277 Goal=   None    Shift=    0.000
 Gap=     0.148 Goal=   None    Shift=    0.000
 RMSDP=6.37D-05 MaxDP=5.31D-03 DE=-8.11D-06 OVMax= 6.85D-03

 Cycle  26  Pass 1  IDiag  1:
 RMSU=  1.94D-05    CP:  9.99D-01  3.00D+00  3.00D+00  3.00D+00  2.48D+00
 E= -732.222604907935     Delta-E=       -0.000011129312 Rises=F Damp=F
 DIIS: error= 2.87D-05 at cycle  26 NSaved=  20.
 NSaved=20 IEnMin=20 EnMin= -732.222604907935     IErMin=10 ErrMin= 2.81D-05
 ErrMax= 2.87D-05  0.00D+00 EMaxC= 1.00D-01 BMatC= 4.96D-07 BMatP= 4.99D-07
 IDIUse=1 WtCom= 1.00D+00 WtEn= 0.00D+00
 Coeff-Com:  0.310D-02 0.252D-02-0.161D-02-0.189D-01-0.396D-01 0.307D-02
 Coeff-Com:  0.197D+00 0.451D-01-0.141D+00-0.205D+00 0.286D+00-0.181D-02
 Coeff-Com: -0.615D+00-0.639D-01 0.340D+00 0.704D+00-0.173D+00-0.879D+00
 Coeff-Com: -0.173D+00 0.173D+01
 Coeff:      0.310D-02 0.252D-02-0.161D-02-0.189D-01-0.396D-01 0.307D-02
 Coeff:      0.197D+00 0.451D-01-0.141D+00-0.205D+00 0.286D+00-0.181D-02
 Coeff:     -0.615D+00-0.639D-01 0.340D+00 0.704D+00-0.173D+00-0.879D+00
 Coeff:     -0.173D+00 0.173D+01
 Gap=     0.277 Goal=   None    Shift=    0.000
 Gap=     0.148 Goal=   None    Shift=    0.000
 RMSDP=3.19D-05 MaxDP=2.51D-03 DE=-1.11D-05 OVMax= 3.39D-03

 Cycle  27  Pass 1  IDiag  1:
 RMSU=  6.37D-06    CP:  9.99D-01  3.00D+00  3.00D+00  3.00D+00  3.00D+00
                    CP:  2.50D+00
 E= -732.222610437275     Delta-E=       -0.000005529340 Rises=F Damp=F
 DIIS: error= 2.83D-05 at cycle  27 NSaved=  20.
 NSaved=20 IEnMin=20 EnMin= -732.222610437275     IErMin= 9 ErrMin= 2.81D-05
 ErrMax= 2.83D-05  0.00D+00 EMaxC= 1.00D-01 BMatC= 4.96D-07 BMatP= 4.96D-07
 IDIUse=1 WtCom= 1.00D+00 WtEn= 0.00D+00
 Coeff-Com:  0.353D-02 0.403D-02-0.104D-01-0.410D-01-0.589D-01 0.152D+00
 Coeff-Com:  0.160D+00-0.776D-01-0.278D+00 0.159D+00 0.761D-01-0.293D+00
 Coeff-Com: -0.128D+00 0.121D+00 0.460D+00 0.236D+00-0.529D+00-0.877D+00
 Coeff-Com:  0.127D+01 0.645D+00
 Coeff:      0.353D-02 0.403D-02-0.104D-01-0.410D-01-0.589D-01 0.152D+00
 Coeff:      0.160D+00-0.776D-01-0.278D+00 0.159D+00 0.761D-01-0.293D+00
 Coeff:     -0.128D+00 0.121D+00 0.460D+00 0.236D+00-0.529D+00-0.877D+00
 Coeff:      0.127D+01 0.645D+00
 Gap=     0.277 Goal=   None    Shift=    0.000
 Gap=     0.148 Goal=   None    Shift=    0.000
 RMSDP=1.40D-05 MaxDP=1.21D-03 DE=-5.53D-06 OVMax= 1.52D-03

 Cycle  28  Pass 1  IDiag  1:
 RMSU=  4.24D-06    CP:  9.99D-01  3.00D+00  3.00D+00  3.00D+00  3.00D+00
                    CP:  3.00D+00  1.60D+00
 E= -732.222612909010     Delta-E=       -0.000002471736 Rises=F Damp=F
 DIIS: error= 2.82D-05 at cycle  28 NSaved=  20.
 NSaved=20 IEnMin=20 EnMin= -732.222612909010     IErMin= 8 ErrMin= 2.81D-05
 ErrMax= 2.82D-05  0.00D+00 EMaxC= 1.00D-01 BMatC= 4.95D-07 BMatP= 4.96D-07
 IDIUse=1 WtCom= 1.00D+00 WtEn= 0.00D+00
 Coeff-Com:  0.703D-02 0.324D-03-0.348D-01-0.873D-01 0.107D+00 0.190D+00
 Coeff-Com: -0.340D-01-0.249D+00 0.387D-01 0.978D-01-0.396D-01-0.108D+00
 Coeff-Com: -0.126D-02 0.142D+00 0.417D+00-0.135D+00-0.109D+01 0.724D+00
 Coeff-Com: -0.539D+00 0.159D+01
 Coeff:      0.703D-02 0.324D-03-0.348D-01-0.873D-01 0.107D+00 0.190D+00
 Coeff:     -0.340D-01-0.249D+00 0.387D-01 0.978D-01-0.396D-01-0.108D+00
 Coeff:     -0.126D-02 0.142D+00 0.417D+00-0.135D+00-0.109D+01 0.724D+00
 Coeff:     -0.539D+00 0.159D+01
 Gap=     0.277 Goal=   None    Shift=    0.000
 Gap=     0.148 Goal=   None    Shift=    0.000
 RMSDP=2.44D-05 MaxDP=2.14D-03 DE=-2.47D-06 OVMax= 2.66D-03

 Cycle  29  Pass 1  IDiag  1:
 RMSU=  1.62D-05    CP:  9.99D-01  3.00D+00  3.00D+00  3.00D+00  3.00D+00
                    CP:  3.00D+00  2.69D+00  3.00D+00
 E= -732.222617243469     Delta-E=       -0.000004334458 Rises=F Damp=F
 DIIS: error= 2.80D-05 at cycle  29 NSaved=  20.
 NSaved=20 IEnMin=20 EnMin= -732.222617243469     IErMin=20 ErrMin= 2.80D-05
 ErrMax= 2.80D-05  0.00D+00 EMaxC= 1.00D-01 BMatC= 4.94D-07 BMatP= 4.95D-07
 IDIUse=1 WtCom= 1.00D+00 WtEn= 0.00D+00
 Coeff-Com: -0.126D-01 0.386D-01 0.226D+00 0.276D-01-0.491D+00-0.143D+00
 Coeff-Com:  0.537D+00 0.213D+00-0.504D+00-0.111D+01 0.831D+00 0.933D+00
 Coeff-Com:  0.155D+00-0.153D+01-0.758D+00 0.247D+01 0.110D+01-0.814D+01
 Coeff-Com:  0.192D+01 0.524D+01
 Coeff:     -0.126D-01 0.386D-01 0.226D+00 0.276D-01-0.491D+00-0.143D+00
 Coeff:      0.537D+00 0.213D+00-0.504D+00-0.111D+01 0.831D+00 0.933D+00
 Coeff:      0.155D+00-0.153D+01-0.758D+00 0.247D+01 0.110D+01-0.814D+01
 Coeff:      0.192D+01 0.524D+01
 Gap=     0.277 Goal=   None    Shift=    0.000
 Gap=     0.148 Goal=   None    Shift=    0.000
 RMSDP=1.39D-04 MaxDP=1.19D-02 DE=-4.33D-06 OVMax= 1.51D-02

 Cycle  30  Pass 1  IDiag  1:
 RMSU=  1.05D-04    CP:  9.98D-01  3.00D+00  3.00D+00  3.00D+00  3.00D+00
                    CP:  3.00D+00  3.00D+00  3.00D+00  3.00D+00
 E= -732.222641916125     Delta-E=       -0.000024672656 Rises=F Damp=F
 DIIS: error= 2.76D-05 at cycle  30 NSaved=  20.
 NSaved=20 IEnMin=20 EnMin= -732.222641916125     IErMin=20 ErrMin= 2.76D-05
 ErrMax= 2.76D-05  0.00D+00 EMaxC= 1.00D-01 BMatC= 4.90D-07 BMatP= 4.94D-07
 IDIUse=1 WtCom= 1.00D+00 WtEn= 0.00D+00
 Coeff-Com: -0.608D-01 0.180D+00 0.360D+00-0.455D+00-0.361D+00 0.246D+00
 Coeff-Com:  0.633D+00-0.245D+00-0.176D+01 0.260D+00 0.113D+01 0.150D+01
 Coeff-Com: -0.211D+01-0.194D+01 0.338D+01 0.130D+01-0.491D+01-0.942D+00
 Coeff-Com:  0.345D+01 0.135D+01
 Coeff:     -0.608D-01 0.180D+00 0.360D+00-0.455D+00-0.361D+00 0.246D+00
 Coeff:      0.633D+00-0.245D+00-0.176D+01 0.260D+00 0.113D+01 0.150D+01
 Coeff:     -0.211D+01-0.194D+01 0.338D+01 0.130D+01-0.491D+01-0.942D+00
 Coeff:      0.345D+01 0.135D+01
 Gap=     0.277 Goal=   None    Shift=    0.000
 Gap=     0.148 Goal=   None    Shift=    0.000
 RMSDP=1.39D-04 MaxDP=1.19D-02 DE=-2.47D-05 OVMax= 1.51D-02

 Cycle  31  Pass 1  IDiag  1:
 RMSU=  1.41D-05    CP:  9.97D-01  3.00D+00  3.00D+00  3.00D+00  3.00D+00
                    CP:  3.00D+00  3.00D+00  3.00D+00  3.00D+00  2.27D+00
 E= -732.222666426950     Delta-E=       -0.000024510825 Rises=F Damp=F
 DIIS: error= 2.68D-05 at cycle  31 NSaved=  20.
 NSaved=20 IEnMin=20 EnMin= -732.222666426950     IErMin=20 ErrMin= 2.68D-05
 ErrMax= 2.68D-05  0.00D+00 EMaxC= 1.00D-01 BMatC= 4.95D-07 BMatP= 4.90D-07
 IDIUse=1 WtCom= 1.00D+00 WtEn= 0.00D+00
 Coeff-Com:  0.180D-01 0.127D+00-0.113D+00-0.944D-01-0.360D-03 0.224D+00
 Coeff-Com:  0.776D-01-0.763D+00-0.499D+00 0.535D+00 0.147D+01-0.128D+01
 Coeff-Com: -0.139D+01 0.238D+01-0.206D+00-0.207D+01 0.142D+00 0.134D+01
 Coeff-Com:  0.210D+00 0.902D+00
 Coeff:      0.180D-01 0.127D+00-0.113D+00-0.944D-01-0.360D-03 0.224D+00
 Coeff:      0.776D-01-0.763D+00-0.499D+00 0.535D+00 0.147D+01-0.128D+01
 Coeff:     -0.139D+01 0.238D+01-0.206D+00-0.207D+01 0.142D+00 0.134D+01
 Coeff:      0.210D+00 0.902D+00
 Gap=     0.277 Goal=   None    Shift=    0.000
 Gap=     0.148 Goal=   None    Shift=    0.000
 RMSDP=4.82D-05 MaxDP=4.03D-03 DE=-2.45D-05 OVMax= 5.17D-03

 Cycle  32  Pass 1  IDiag  1:
 RMSU=  4.62D-06    CP:  9.97D-01  3.00D+00  3.00D+00  3.00D+00  3.00D+00
                    CP:  3.00D+00  3.00D+00  3.00D+00  3.00D+00  2.71D+00
                    CP:  1.35D+00
 E= -732.222674803589     Delta-E=       -0.000008376639 Rises=F Damp=F
 DIIS: error= 2.68D-05 at cycle  32 NSaved=  20.
 NSaved=20 IEnMin=20 EnMin= -732.222674803589     IErMin=20 ErrMin= 2.68D-05
 ErrMax= 2.68D-05  0.00D+00 EMaxC= 1.00D-01 BMatC= 4.87D-07 BMatP= 4.90D-07
 IDIUse=1 WtCom= 1.00D+00 WtEn= 0.00D+00
 Coeff-Com:  0.131D+00-0.159D+00-0.102D+00 0.103D+00 0.599D-01 0.635D-01
 Coeff-Com: -0.274D+00-0.365D+00 0.344D+00 0.591D+00-0.836D+00-0.500D+00
 Coeff-Com:  0.215D+01-0.721D+00-0.325D+01 0.160D+01 0.154D+01-0.127D+01
 Coeff-Com: -0.847D+00 0.274D+01
 Coeff:      0.131D+00-0.159D+00-0.102D+00 0.103D+00 0.599D-01 0.635D-01
 Coeff:     -0.274D+00-0.365D+00 0.344D+00 0.591D+00-0.836D+00-0.500D+00
 Coeff:      0.215D+01-0.721D+00-0.325D+01 0.160D+01 0.154D+01-0.127D+01
 Coeff:     -0.847D+00 0.274D+01
 Gap=     0.277 Goal=   None    Shift=    0.000
 Gap=     0.148 Goal=   None    Shift=    0.000
 RMSDP=1.95D-04 MaxDP=1.65D-02 DE=-8.38D-06 OVMax= 2.12D-02

 Cycle  33  Pass 1  IDiag  1:
 RMSU=  1.56D-04    CP:  9.97D-01  3.00D+00  3.00D+00  3.00D+00  3.00D+00
                    CP:  3.00D+00  3.00D+00  3.00D+00  3.00D+00  3.00D+00
                    CP:  2.83D+00  2.96D+00
 E= -732.222708681916     Delta-E=       -0.000033878327 Rises=F Damp=F
 DIIS: error= 2.66D-05 at cycle  33 NSaved=  20.
 NSaved=20 IEnMin=20 EnMin= -732.222708681916     IErMin=20 ErrMin= 2.66D-05
 ErrMax= 2.66D-05  0.00D+00 EMaxC= 1.00D-01 BMatC= 5.31D-07 BMatP= 4.87D-07
 IDIUse=1 WtCom= 1.00D+00 WtEn= 0.00D+00
 Coeff-Com: -0.111D+00 0.202D-02 0.313D+00-0.238D+00-0.196D+00-0.146D+00
 Coeff-Com:  0.207D+00 0.524D+00-0.798D-01-0.689D+00 0.416D-02 0.124D+01
 Coeff-Com: -0.143D+01-0.770D+01 0.603D+01 0.421D+01-0.171D+01-0.292D+01
 Coeff-Com:  0.224D+01 0.145D+01
 Coeff:     -0.111D+00 0.202D-02 0.313D+00-0.238D+00-0.196D+00-0.146D+00
 Coeff:      0.207D+00 0.524D+00-0.798D-01-0.689D+00 0.416D-02 0.124D+01
 Coeff:     -0.143D+01-0.770D+01 0.603D+01 0.421D+01-0.171D+01-0.292D+01
 Coeff:      0.224D+01 0.145D+01
 Gap=     0.277 Goal=   None    Shift=    0.000
 Gap=     0.148 Goal=   None    Shift=    0.000
 RMSDP=8.84D-05 MaxDP=6.80D-03 DE=-3.39D-05 OVMax= 9.03D-03

 Cycle  34  Pass 1  IDiag  1:
 RMSU=  2.46D-05    CP:  9.96D-01  3.00D+00  3.00D+00  3.00D+00  3.00D+00
                    CP:  3.00D+00  3.00D+00  3.00D+00  3.00D+00  3.00D+00
                    CP:  3.00D+00  3.00D+00  1.51D+00
 E= -732.222723081856     Delta-E=       -0.000014399940 Rises=F Damp=F
 DIIS: error= 2.73D-05 at cycle  34 NSaved=  20.
 NSaved=20 IEnMin=20 EnMin= -732.222723081856     IErMin=19 ErrMin= 2.66D-05
 ErrMax= 2.73D-05  0.00D+00 EMaxC= 1.00D-01 BMatC= 4.74D-07 BMatP= 4.87D-07
 IDIUse=1 WtCom= 1.00D+00 WtEn= 0.00D+00
 Coeff-Com:  0.159D-01 0.322D-01-0.750D-01 0.105D+00-0.306D+00-0.308D+00
 Coeff-Com:  0.263D+00 0.749D+00-0.691D+00-0.629D+00 0.131D+01-0.374D+00
 Coeff-Com: -0.296D+01 0.154D+01 0.182D+01 0.793D-01-0.748D+00-0.641D+00
 Coeff-Com:  0.888D+00 0.935D+00
 Coeff:      0.159D-01 0.322D-01-0.750D-01 0.105D+00-0.306D+00-0.308D+00
 Coeff:      0.263D+00 0.749D+00-0.691D+00-0.629D+00 0.131D+01-0.374D+00
 Coeff:     -0.296D+01 0.154D+01 0.182D+01 0.793D-01-0.748D+00-0.641D+00
 Coeff:      0.888D+00 0.935D+00
 Gap=     0.277 Goal=   None    Shift=    0.000
 Gap=     0.148 Goal=   None    Shift=    0.000
 RMSDP=9.23D-05 MaxDP=7.83D-03 DE=-1.44D-05 OVMax= 9.92D-03

 Cycle  35  Pass 1  IDiag  1:
 RMSU=  7.37D-06    CP:  9.96D-01  3.00D+00  3.00D+00  3.00D+00  3.00D+00
                    CP:  3.00D+00  3.00D+00  3.00D+00  3.00D+00  3.00D+00
                    CP:  3.00D+00  3.00D+00  2.08D+00  1.48D+00
 E= -732.222738805059     Delta-E=       -0.000015723203 Rises=F Damp=F
 DIIS: error= 2.74D-05 at cycle  35 NSaved=  20.
 NSaved=20 IEnMin=20 EnMin= -732.222738805059     IErMin=18 ErrMin= 2.66D-05
 ErrMax= 2.74D-05  0.00D+00 EMaxC= 1.00D-01 BMatC= 4.74D-07 BMatP= 4.74D-07
 IDIUse=1 WtCom= 1.00D+00 WtEn= 0.00D+00
 Coeff-Com:  0.102D+00-0.670D-01 0.103D+00-0.436D+00-0.295D+00 0.333D+00
 Coeff-Com:  0.820D+00-0.689D+00-0.716D+00 0.789D+00-0.127D+00-0.139D+01
 Coeff-Com:  0.910D+00 0.101D+01 0.108D+01 0.774D+00-0.312D+01 0.284D+00
 Coeff-Com: -0.983D-01 0.173D+01
 Coeff:      0.102D+00-0.670D-01 0.103D+00-0.436D+00-0.295D+00 0.333D+00
 Coeff:      0.820D+00-0.689D+00-0.716D+00 0.789D+00-0.127D+00-0.139D+01
 Coeff:      0.910D+00 0.101D+01 0.108D+01 0.774D+00-0.312D+01 0.284D+00
 Coeff:     -0.983D-01 0.173D+01
 Gap=     0.277 Goal=   None    Shift=    0.000
 Gap=     0.148 Goal=   None    Shift=    0.000
 RMSDP=2.84D-05 MaxDP=1.87D-03 DE=-1.57D-05 OVMax= 8.77D-04

 Cycle  36  Pass 1  IDiag  1:
 RMSU=  6.78D-06    CP:  9.96D-01  3.00D+00  3.00D+00  3.00D+00  3.00D+00
                    CP:  3.00D+00  3.00D+00  3.00D+00  3.00D+00  3.00D+00
                    CP:  3.00D+00  3.00D+00  2.11D+00  2.52D+00  2.44D-01
 E= -732.222739336238     Delta-E=       -0.000000531179 Rises=F Damp=F
 DIIS: error= 3.08D-05 at cycle  36 NSaved=  20.
 NSaved=20 IEnMin=20 EnMin= -732.222739336238     IErMin=17 ErrMin= 2.66D-05
 ErrMax= 3.08D-05  0.00D+00 EMaxC= 1.00D-01 BMatC= 7.15D-07 BMatP= 4.74D-07
 IDIUse=1 WtCom= 1.00D+00 WtEn= 0.00D+00
 Coeff-Com:  0.114D+00 0.229D+00-0.705D+00-0.657D+00 0.398D+00 0.149D+01
 Coeff-Com: -0.110D+01-0.121D+01 0.159D+01-0.287D+00-0.906D+00 0.348D+00
 Coeff-Com:  0.820D+00 0.167D+01 0.125D+01-0.405D+01-0.242D+00 0.120D+01
 Coeff-Com:  0.144D+01-0.406D+00
 Coeff:      0.114D+00 0.229D+00-0.705D+00-0.657D+00 0.398D+00 0.149D+01
 Coeff:     -0.110D+01-0.121D+01 0.159D+01-0.287D+00-0.906D+00 0.348D+00
 Coeff:      0.820D+00 0.167D+01 0.125D+01-0.405D+01-0.242D+00 0.120D+01
 Coeff:      0.144D+01-0.406D+00
 Gap=     0.277 Goal=   None    Shift=    0.000
 Gap=     0.148 Goal=   None    Shift=    0.000
 RMSDP=5.48D-05 MaxDP=4.70D-03 DE=-5.31D-07 OVMax= 5.94D-03

 Cycle  37  Pass 1  IDiag  1:
 RMSU=  2.87D-06    CP:  9.96D-01  3.00D+00  3.00D+00  3.00D+00  3.00D+00
                    CP:  3.00D+00  3.00D+00  3.00D+00  3.00D+00  3.00D+00
                    CP:  3.00D+00  3.00D+00  1.77D+00  2.26D+00 -1.56D-01
                    CP:  8.90D-01
 E= -732.222729870143     Delta-E=        0.000009466095 Rises=F Damp=F
 DIIS: error= 3.21D-05 at cycle  37 NSaved=  20.
 NSaved=20 IEnMin=19 EnMin= -732.222739336238     IErMin=16 ErrMin= 2.66D-05
 ErrMax= 3.21D-05  0.00D+00 EMaxC= 1.00D-01 BMatC= 7.57D-07 BMatP= 4.74D-07
 IDIUse=1 WtCom= 1.00D+00 WtEn= 0.00D+00
 Coeff-Com:  0.334D+00-0.395D+00-0.799D+00 0.197D+00 0.137D+01-0.955D+00
 Coeff-Com: -0.102D+01 0.160D+01-0.534D+00-0.195D+00 0.113D+00 0.236D+00
 Coeff-Com:  0.147D+01 0.149D+01-0.370D+01-0.369D+00 0.609D+00 0.192D+01
 Coeff-Com: -0.156D+01 0.119D+01
 Coeff:      0.334D+00-0.395D+00-0.799D+00 0.197D+00 0.137D+01-0.955D+00
 Coeff:     -0.102D+01 0.160D+01-0.534D+00-0.195D+00 0.113D+00 0.236D+00
 Coeff:      0.147D+01 0.149D+01-0.370D+01-0.369D+00 0.609D+00 0.192D+01
 Coeff:     -0.156D+01 0.119D+01
 Gap=     0.277 Goal=   None    Shift=    0.000
 Gap=     0.148 Goal=   None    Shift=    0.000
 RMSDP=1.25D-05 MaxDP=9.58D-04 DE= 9.47D-06 OVMax= 1.14D-03

 Cycle  38  Pass 1  IDiag  1:
 RMSU=  7.41D-07    CP:  9.96D-01  3.00D+00  3.00D+00  3.00D+00  3.00D+00
                    CP:  3.00D+00  3.00D+00  3.00D+00  3.00D+00  3.00D+00
                    CP:  3.00D+00  3.00D+00  1.71D+00  2.05D+00  1.46D-01
                    CP:  6.17D-01  1.93D+00
 E= -732.222728134436     Delta-E=        0.000001735707 Rises=F Damp=F
 DIIS: error= 2.81D-05 at cycle  38 NSaved=  20.
 NSaved=20 IEnMin=18 EnMin= -732.222739336238     IErMin=15 ErrMin= 2.66D-05
 ErrMax= 2.81D-05  0.00D+00 EMaxC= 1.00D-01 BMatC= 6.58D-07 BMatP= 4.74D-07
 IDIUse=1 WtCom= 1.00D+00 WtEn= 0.00D+00
 Coeff-Com: -0.324D+00-0.120D+00 0.351D+00 0.678D+00-0.904D+00-0.735D+00
 Coeff-Com:  0.126D+01-0.286D+00-0.222D+01 0.135D+01 0.140D+01 0.910D+00
 Coeff-Com:  0.458D+00-0.264D+01 0.792D-01 0.486D+00 0.163D+01-0.110D+01
 Coeff-Com:  0.133D+01-0.596D+00
 Coeff:     -0.324D+00-0.120D+00 0.351D+00 0.678D+00-0.904D+00-0.735D+00
 Coeff:      0.126D+01-0.286D+00-0.222D+01 0.135D+01 0.140D+01 0.910D+00
 Coeff:      0.458D+00-0.264D+01 0.792D-01 0.486D+00 0.163D+01-0.110D+01
 Coeff:      0.133D+01-0.596D+00
 Gap=     0.277 Goal=   None    Shift=    0.000
 Gap=     0.148 Goal=   None    Shift=    0.000
 RMSDP=2.39D-05 MaxDP=1.87D-03 DE= 1.74D-06 OVMax= 2.80D-03

 Cycle  39  Pass 1  IDiag  1:
 RMSU=  2.96D-06    CP:  9.96D-01  3.00D+00  3.00D+00  3.00D+00  3.00D+00
                    CP:  3.00D+00  3.00D+00  3.00D+00  3.00D+00  3.00D+00
                    CP:  3.00D+00  3.00D+00  1.85D+00  2.09D+00  7.75D-01
                    CP:  2.23D-01  2.40D+00  2.13D+00
 E= -732.222732234476     Delta-E=       -0.000004100039 Rises=F Damp=F
 DIIS: error= 2.76D-05 at cycle  39 NSaved=  20.
 NSaved=20 IEnMin=17 EnMin= -732.222739336238     IErMin=14 ErrMin= 2.66D-05
 ErrMax= 2.76D-05  0.00D+00 EMaxC= 1.00D-01 BMatC= 5.78D-07 BMatP= 4.74D-07
 IDIUse=1 WtCom= 1.00D+00 WtEn= 0.00D+00
 Coeff-Com: -0.289D+00 0.136D+00 0.572D+00-0.689D+00-0.515D+00 0.102D+01
 Coeff-Com: -0.651D+00-0.129D+01 0.137D+01 0.728D+00 0.738D+00 0.650D+00
 Coeff-Com: -0.249D+01-0.121D-01 0.255D+00 0.173D+01-0.122D+01 0.135D+01
 Coeff-Com: -0.561D+00 0.157D+00
 Coeff:     -0.289D+00 0.136D+00 0.572D+00-0.689D+00-0.515D+00 0.102D+01
 Coeff:     -0.651D+00-0.129D+01 0.137D+01 0.728D+00 0.738D+00 0.650D+00
 Coeff:     -0.249D+01-0.121D-01 0.255D+00 0.173D+01-0.122D+01 0.135D+01
 Coeff:     -0.561D+00 0.157D+00
 Gap=     0.277 Goal=   None    Shift=    0.000
 Gap=     0.148 Goal=   None    Shift=    0.000
 RMSDP=7.04D-06 MaxDP=5.33D-04 DE=-4.10D-06 OVMax= 8.36D-04

 Error on total polarization charges =  0.04639
 SCF Done:  E(UM062X) =  -732.222732234     A.U. after   39 cycles
            NFock= 39  Conv=0.70D-05     -V/T= 2.0646
 <Sx>= 0.0000 <Sy>= 0.0000 <Sz>= 1.5000 <S**2>= 4.7611 S= 1.7385
 <L.S>=  0.00000000000    
 KE= 6.878199226516D+02 PE=-3.313492966391D+03 EE= 1.066605638188D+03
 SMD-CDS (non-electrostatic) energy       (kcal/mol) =       6.60
 (included in total energy above)
 Annihilation of the first spin contaminant:
 S**2 before annihilation     4.7611,   after     3.7873
 Leave Link  502 at Wed May 31 23:10:42 2023, MaxMem=  2684354560 cpu:            1912.5 elap:             191.9
 (Enter /home/xut/apps/g16/l701.exe)
 ... and contract with generalized density number  0.
 Compute integral first derivatives.
   1 Symmetry operations used in ECPInt.
 ECPInt:  NShTT=    6105 NPrTT=   23469 LenC2=    5789 LenP2D=   15734.
 LDataN:  DoStor=T MaxTD1= 5 Len=  102
 D1PCM: PCM CHGder 1st derivatives, ID1Alg=3 FixD1E=F DoIter=F DoCFld=F I1PDM=0.
 GePol: Maximum number of non-zero 1st derivatives   =     183
 Leave Link  701 at Wed May 31 23:10:43 2023, MaxMem=  2684354560 cpu:               9.8 elap:               1.0
 (Enter /home/xut/apps/g16/l702.exe)
 L702 exits ... SP integral derivatives will be done elsewhere.
 Leave Link  702 at Wed May 31 23:10:43 2023, MaxMem=  2684354560 cpu:               0.1 elap:               0.0
 (Enter /home/xut/apps/g16/l703.exe)
 Integral derivatives from FoFJK, PRISM(SPDF).
 Compute integral first derivatives, UseDBF=F ICtDFT=           0.
 Calling FoFJK, ICntrl=      2127 FMM=F ISym2X=0 I1Cent= 0 IOpClX= 1 NMat=1 NMatS=1 NMatT=0.
 FoFJK:  IHMeth= 1 ICntrl=    2127 DoSepK=F KAlg= 0 I1Cent=           0 FoldK=F
 IRaf=         0 NMat=       1 IRICut=       1 DoRegI=T DoRafI=F ISym2E= 0 IDoP0=0 IntGTp=1.
 FoFCou: FMM=F IPFlag=           0 FMFlag=      100000 FMFlg1=         800
         NFxFlg=           0 DoJE=F BraDBF=F KetDBF=F FulRan=T
         wScrn=  0.000000 ICntrl=      2127 IOpCl=  1 I1Cent=           0 NGrid=           0
         NMat0=    1 NMatS0=      1 NMatT0=    0 NMatD0=    1 NMtDS0=    0 NMtDT0=    0
 Symmetry not used in FoFCou.
 Leave Link  703 at Wed May 31 23:10:54 2023, MaxMem=  2684354560 cpu:             110.2 elap:              11.1
 (Enter /home/xut/apps/g16/l716.exe)
 Dipole        = 1.62501618D+01-1.10344374D+00-4.04183194D-01
 ***** Axes restored to original set *****
 -------------------------------------------------------------------
 Center     Atomic                   Forces (Hartrees/Bohr)
 Number     Number              X              Y              Z
 -------------------------------------------------------------------
      1        6          -0.005922121   -0.001493320    0.002020993
      2        6           0.006889262    0.005106486   -0.000754179
      3        6           0.003635816   -0.002541807   -0.000527686
      4        6           0.002127022   -0.001071413    0.002032506
      5        6          -0.001890608   -0.009639353    0.000038762
      6        6          -0.000587131    0.003971422    0.003035641
      7        1          -0.000582886   -0.000374456   -0.000193882
      8        1          -0.001432887    0.000878019   -0.000542766
      9        6          -0.001426850   -0.003102176   -0.003292178
     10        8           0.001841654    0.003116443    0.002530448
     11        1           0.000915727    0.000358934   -0.000602362
     12        8           0.002811988   -0.002519003    0.000052850
     13        8          -0.004159689    0.006112488   -0.000345383
     14        1          -0.005209154   -0.003131542   -0.000643660
     15        8          -0.002977592    0.003808931   -0.002189610
     16        1          -0.000522160   -0.000861109    0.000651747
     17        8          -0.000659013    0.002941112   -0.001153703
     18        1           0.000955012   -0.001571553   -0.000183662
     19       24           0.006193611    0.000011896    0.000066123
 -------------------------------------------------------------------
 Cartesian Forces:  Max     0.009639353 RMS     0.002968404
 Leave Link  716 at Wed May 31 23:10:54 2023, MaxMem=  2684354560 cpu:               0.2 elap:               0.0
 (Enter /home/xut/apps/g16/l103.exe)

 GradGradGradGradGradGradGradGradGradGradGradGradGradGradGradGradGradGrad
 Berny optimization.
 Using GEDIIS/GDIIS optimizer.
 FormGI is forming the generalized inverse of G from B-inverse, IUseBI=4.
 Internal  Forces:  Max     0.009907611 RMS     0.003377311
 Search for a local minimum.
 Step number   5 out of a maximum of   94
 All quantities printed in internal units (Hartrees-Bohrs-Radians)
 RMS Force = .33773D-02 SwitMx=.10000D-02 MixMth= 1
 Mixed Optimization -- RFO/linear search
 Update second derivatives using D2CorX and points    4    5
 DE= -1.10D-03 DEPred=-1.91D-03 R= 5.77D-01
 TightC=F SS=  1.41D+00  RLast= 4.62D-01 DXNew= 1.9608D+00 1.3873D+00
 Trust test= 5.77D-01 RLast= 4.62D-01 DXMaxT set to 1.39D+00
 ITU=  1  1  1  1  0
 Use linear search instead of GDIIS.
     Eigenvalues ---    0.00210   0.00833   0.01115   0.01195   0.01369
     Eigenvalues ---    0.01653   0.01752   0.01780   0.01973   0.02080
     Eigenvalues ---    0.02285   0.02347   0.02416   0.02952   0.02998
     Eigenvalues ---    0.03014   0.06449   0.15416   0.15815   0.15991
     Eigenvalues ---    0.16041   0.16060   0.16186   0.22676   0.23040
     Eigenvalues ---    0.23292   0.24106   0.24648   0.24982   0.24997
     Eigenvalues ---    0.25025   0.25769   0.28558   0.35185   0.37007
     Eigenvalues ---    0.37271   0.38272   0.41085   0.42586   0.43689
     Eigenvalues ---    0.51222   0.53061   0.54526   0.55321   0.55470
     Eigenvalues ---    0.55487   0.63323   0.66827   0.69988   0.84514
     Eigenvalues ---    0.91513
 RFO step:  Lambda=-1.70674930D-03 EMin= 2.09549169D-03
 Quartic linear search produced a step of -0.25363.
 Iteration  1 RMS(Cart)=  0.03883084 RMS(Int)=  0.00074470
 Iteration  2 RMS(Cart)=  0.00084242 RMS(Int)=  0.00018222
 Iteration  3 RMS(Cart)=  0.00000043 RMS(Int)=  0.00018222
 ITry= 1 IFail=0 DXMaxC= 1.46D-01 DCOld= 1.00D+10 DXMaxT= 1.39D+00 DXLimC= 3.00D+00 Rises=F
 Variable       Old X    -DE/DX   Delta X   Delta X   Delta X     New X
                                 (Linear)    (Quad)   (Total)
    R1        2.68717  -0.00750   0.00347  -0.02072  -0.01721   2.66995
    R2        2.60739   0.00087   0.00210  -0.00392  -0.00181   2.60558
    R3        2.51722   0.00141  -0.00412   0.01005   0.00593   2.52315
    R4        2.66565   0.00169  -0.00292   0.00966   0.00677   2.67242
    R5        2.05032   0.00006   0.00051  -0.00187  -0.00136   2.04896
    R6        2.58573  -0.00619   0.00171  -0.01329  -0.01160   2.57413
    R7        2.84233  -0.00396  -0.00142  -0.00603  -0.00745   2.83488
    R8        2.74221  -0.00705  -0.00510  -0.00503  -0.01017   2.73204
    R9        2.05087  -0.00050   0.00030  -0.00202  -0.00172   2.04914
   R10        2.65810   0.00991  -0.00287   0.01865   0.01575   2.67385
   R11        2.47182  -0.00800  -0.00307  -0.00204  -0.00511   2.46671
   R12        2.54187   0.00299   0.00388  -0.00302   0.00085   2.54273
   R13        2.52344  -0.00476  -0.00513   0.00561   0.00048   2.52392
   R14        2.27946  -0.00350  -0.00110   0.00059  -0.00051   2.27895
   R15        1.82859   0.00043   0.00004   0.00002   0.00006   1.82865
   R16        1.84626  -0.00587  -0.00088  -0.00463  -0.00551   1.84075
   R17        1.84034  -0.00099   0.00021  -0.00239  -0.00218   1.83817
   R18        4.50853   0.00566  -0.02341   0.08497   0.06156   4.57008
   R19        1.83536  -0.00184   0.00033  -0.00359  -0.00326   1.83210
    A1        2.09771   0.00022  -0.00015   0.00019  -0.00012   2.09759
    A2        2.14808  -0.00063  -0.00027  -0.00166  -0.00209   2.14598
    A3        2.03646   0.00046   0.00049   0.00276   0.00308   2.03954
    A4        2.12816  -0.00148  -0.00333   0.00098  -0.00231   2.12585
    A5        2.05456   0.00139   0.00239   0.00176   0.00416   2.05872
    A6        2.10043   0.00008   0.00093  -0.00279  -0.00185   2.09857
    A7        2.06798   0.00434   0.00132   0.00871   0.01000   2.07798
    A8        2.02700   0.00188  -0.00187   0.01289   0.01103   2.03803
    A9        2.18771  -0.00622   0.00068  -0.02227  -0.02156   2.16615
   A10        2.08945  -0.00078   0.00227  -0.00900  -0.00690   2.08254
   A11        2.18071  -0.00127   0.00070  -0.00880  -0.00812   2.17259
   A12        2.01165   0.00209  -0.00275   0.01872   0.01596   2.02762
   A13        2.11829  -0.00104  -0.00189   0.00373   0.00167   2.11996
   A14        2.03280  -0.00836  -0.00554  -0.00500  -0.01052   2.02229
   A15        2.13197   0.00940   0.00746   0.00149   0.00897   2.14094
   A16        2.06388  -0.00125   0.00173  -0.00330  -0.00154   2.06234
   A17        2.13857  -0.00827  -0.00648   0.00266  -0.00368   2.13490
   A18        2.07831   0.00959   0.00535   0.00075   0.00622   2.08453
   A19        2.07073  -0.00137   0.00435  -0.01432  -0.01078   2.05995
   A20        2.11957  -0.00039  -0.00340   0.00705   0.00284   2.12241
   A21        2.09274   0.00178  -0.00091   0.00840   0.00668   2.09942
   A22        1.98992  -0.00155   0.00186  -0.00971  -0.00785   1.98208
   A23        1.96855   0.00334  -0.00240   0.01953   0.01713   1.98568
   A24        1.92901  -0.00404  -0.00485   0.00495  -0.00003   1.92898
   A25        2.57827   0.00762   0.00559  -0.00074   0.00473   2.58299
   A26        1.77547  -0.00357  -0.00071  -0.00346  -0.00430   1.77117
   A27        1.96348  -0.00070  -0.00500   0.01191   0.00691   1.97039
    D1       -0.02709   0.00012   0.00002   0.01078   0.01077  -0.01632
    D2        3.10495   0.00051   0.00545   0.00441   0.00980   3.11475
    D3       -3.12051  -0.00110  -0.00210  -0.02235  -0.02447   3.13820
    D4        0.01154  -0.00071   0.00333  -0.02872  -0.02544  -0.01391
    D5        0.00706  -0.00002  -0.00248   0.00687   0.00434   0.01140
    D6       -3.05903  -0.00152  -0.01851   0.00519  -0.01355  -3.07258
    D7        3.10348   0.00109  -0.00051   0.03782   0.03735   3.14083
    D8        0.03738  -0.00041  -0.01654   0.03614   0.01947   0.05685
    D9        0.00752   0.00044  -0.00105   0.01581   0.01479   0.02231
   D10       -3.08746  -0.00073  -0.00309  -0.01617  -0.01928  -3.10675
   D11        0.00992   0.00018   0.00239  -0.00439  -0.00194   0.00798
   D12        3.11958   0.00011   0.01019  -0.02665  -0.01665   3.10293
   D13       -3.12187  -0.00023  -0.00317   0.00212  -0.00098  -3.12286
   D14       -0.01222  -0.00030   0.00462  -0.02014  -0.01569  -0.02790
   D15        0.02528  -0.00038  -0.00217  -0.01867  -0.02087   0.00441
   D16        3.10782   0.00050   0.00393   0.00155   0.00525   3.11307
   D17       -3.08116  -0.00049  -0.01075   0.00505  -0.00572  -3.08688
   D18        0.00138   0.00039  -0.00464   0.02528   0.02039   0.02177
   D19        2.83453   0.00061   0.03352  -0.02666   0.00680   2.84133
   D20       -0.28843  -0.00087   0.02806  -0.09669  -0.06863  -0.35706
   D21       -0.34147   0.00077   0.04192  -0.04995  -0.00803  -0.34951
   D22        2.81875  -0.00071   0.03646  -0.11997  -0.08346   2.73529
   D23       -0.04561   0.00053  -0.00031   0.03700   0.03661  -0.00899
   D24        3.07953   0.00099   0.00269   0.05170   0.05427   3.13380
   D25       -3.13368  -0.00017  -0.00589   0.01948   0.01334  -3.12034
   D26       -0.00855   0.00029  -0.00289   0.03418   0.03100   0.02245
   D27        0.02837  -0.00023   0.00265  -0.03008  -0.02748   0.00088
   D28        3.09713   0.00044   0.01803  -0.02837  -0.01056   3.08658
   D29       -3.09582  -0.00054  -0.00048  -0.04557  -0.04617   3.14120
   D30       -0.02706   0.00013   0.01490  -0.04385  -0.02924  -0.05630
   D31       -3.09718  -0.00064  -0.00149  -0.02550  -0.02697  -3.12415
   D32        0.02782  -0.00029   0.00151  -0.01065  -0.00916   0.01866
   D33       -0.00422   0.00108   0.05447  -0.04422   0.01030   0.00608
   D34       -3.10415   0.00084   0.03499  -0.07953  -0.04448   3.13455
   D35       -3.06971   0.00003   0.03834  -0.04575  -0.00748  -3.07719
   D36        0.11354  -0.00021   0.01886  -0.08106  -0.06226   0.05128
   D37       -0.04493  -0.00116   0.00565  -0.06285  -0.05723  -0.10215
   D38        3.07833   0.00027   0.01103   0.00606   0.01712   3.09546
         Item               Value     Threshold  Converged?
 Maximum Force            0.009908     0.000450     NO 
 RMS     Force            0.003377     0.000300     NO 
 Maximum Displacement     0.145976     0.001800     NO 
 RMS     Displacement     0.039017     0.001200     NO 
 Predicted change in Energy=-1.045205D-03
 Lowest energy point so far.  Saving SCF results.
 GradGradGradGradGradGradGradGradGradGradGradGradGradGradGradGradGradGrad

 Leave Link  103 at Wed May 31 23:10:54 2023, MaxMem=  2684354560 cpu:               0.2 elap:               0.0
 (Enter /home/xut/apps/g16/l202.exe)
                          Input orientation:                          
 ---------------------------------------------------------------------
 Center     Atomic      Atomic             Coordinates (Angstroms)
 Number     Number       Type             X           Y           Z
 ---------------------------------------------------------------------
      1          6           0       -0.264975    1.430741   -0.028935
      2          6           0       -1.656670    1.187854   -0.008560
      3          6           0       -2.183699   -0.123632    0.037994
      4          6           0       -1.325347   -1.180747    0.073374
      5          6           0        0.099547   -0.936226    0.068040
      6          6           0        0.623329    0.377167    0.016014
      7          1           0       -2.322237    2.043730   -0.019692
      8          1           0       -1.632262   -2.218907    0.135550
      9          6           0       -3.676933   -0.249711    0.107365
     10          8           0       -4.221832   -1.430591   -0.196666
     11          1           0       -3.582463   -2.078755   -0.524537
     12          8           0       -4.371448    0.662186    0.482133
     13          8           0        0.859527   -1.996569    0.112511
     14          1           0        1.812736   -1.796283    0.123049
     15          8           0        1.954859    0.560952    0.077353
     16          1           0        2.167904    1.509974    0.089568
     17          8           0        0.257429    2.658571   -0.076581
     18          1           0       -0.416516    3.355521   -0.075438
     19         24           0        4.158526   -0.428599    0.192335
 ---------------------------------------------------------------------
                    Distance matrix (angstroms):
                    1          2          3          4          5
     1  C    0.000000
     2  C    1.412878   0.000000
     3  C    2.470234   1.414186   0.000000
     4  C    2.820412   2.393065   1.362172   0.000000
     5  C    2.396834   2.757151   2.423721   1.445733   0.000000
     6  C    1.378812   2.419961   2.851436   2.495541   1.414940
     7  H    2.146664   1.084263   2.172551   3.376345   3.840946
     8  H    3.900828   3.409895   2.168819   1.084361   2.156152
     9  C    3.805778   2.482235   1.500151   2.529415   3.838574
    10  O    4.885906   3.670381   2.432528   2.919755   4.357612
    11  H    4.854678   3.826962   2.468904   2.501696   3.900476
    12  O    4.208917   2.808403   2.366646   3.583604   4.766150
    13  O    3.609842   4.060351   3.574167   2.332546   1.305325
    14  H    3.841050   4.578119   4.333185   3.198268   1.917744
    15  O    2.386523   3.666542   4.194981   3.713931   2.384075
    16  H    2.437052   3.839369   4.648416   4.409427   3.203507
    17  O    1.335194   2.414832   3.703092   4.155482   3.601167
    18  H    1.931296   2.498246   3.903884   4.628806   4.325043
    19  Cr   4.803485   6.039022   6.351429   5.536492   4.092487
                    6          7          8          9         10
     6  C    0.000000
     7  H    3.384533   0.000000
     8  H    3.441160   4.320907   0.000000
     9  C    4.346673   2.666686   2.838874   0.000000
    10  O    5.175791   3.963671   2.727212   1.335601   0.000000
    11  H    4.900248   4.340267   2.063647   1.937428   0.967682
    12  O    5.024569   2.521856   3.990483   1.205968   2.205191
    13  O    2.387410   5.144425   2.501794   4.861173   5.122122
    14  H    2.479926   5.644827   3.470847   5.703384   6.054086
    15  O    1.345553   4.527869   4.538550   5.689917   6.495602
    16  H    1.916865   4.523074   5.324277   6.104008   7.039714
    17  O    2.312414   2.652535   5.235048   4.896033   6.066255
    18  H    3.155983   2.314233   5.709361   4.864301   6.115717
    19  Cr   3.630147   6.939572   6.061489   7.837961   8.449007
                   11         12         13         14         15
    11  H    0.000000
    12  O    3.024671   0.000000
    13  O    4.488191   5.879514   0.000000
    14  H    5.441261   6.664618   0.974081   0.000000
    15  O    6.163786   6.340052   2.782428   2.361958   0.000000
    16  H    6.806086   6.605753   3.742755   3.325447   0.972717
    17  O    6.114547   5.071905   4.697723   4.722770   2.702771
    18  H    6.305256   4.817305   5.505313   5.616943   3.668294
    19  Cr   7.947316   8.604316   3.653532   2.716265   2.418384
                   16         17         18         19
    16  H    0.000000
    17  O    2.235351   0.000000
    18  H    3.180016   0.969506   0.000000
    19  Cr   2.780504   4.982117   5.943255   0.000000
 Stoichiometry    C7H6CrO5(3+,4)
 Framework group  C1[X(C7H6CrO5)]
 Deg. of freedom    51
 Full point group                 C1      NOp   1
 RotChk:  IX=0 Diff= 8.84D-03
 Largest Abelian subgroup         C1      NOp   1
 Largest concise Abelian subgroup C1      NOp   1
                         Standard orientation:                         
 ---------------------------------------------------------------------
 Center     Atomic      Atomic             Coordinates (Angstroms)
 Number     Number       Type             X           Y           Z
 ---------------------------------------------------------------------
      1          6           0       -0.295679    1.452824   -0.100275
      2          6           0       -1.684060    1.193051   -0.066505
      3          6           0       -2.194759   -0.124915   -0.020938
      4          6           0       -1.323430   -1.171745    0.000183
      5          6           0        0.098284   -0.910009   -0.018888
      6          6           0        0.605655    0.409851   -0.069883
      7          1           0       -2.359952    2.040870   -0.066402
      8          1           0       -1.617165   -2.213824    0.060418
      9          6           0       -3.685553   -0.269353    0.063470
     10          8           0       -4.219390   -1.455243   -0.240688
     11          1           0       -3.575767   -2.094043   -0.578466
     12          8           0       -4.386991    0.632264    0.450029
     13          8           0        0.871388   -1.961299    0.012340
     14          1           0        1.822177   -1.749569    0.013870
     15          8           0        1.935452    0.609405   -0.021606
     16          1           0        2.137186    1.560860   -0.006914
     17          8           0        0.211389    2.687090   -0.147301
     18          1           0       -0.470839    3.375836   -0.135625
     19         24           0        4.151951   -0.354004    0.065331
 ---------------------------------------------------------------------
 Rotational constants (GHZ):           1.4973650           0.2695253           0.2295303
 Leave Link  202 at Wed May 31 23:10:54 2023, MaxMem=  2684354560 cpu:               0.1 elap:               0.0
 (Enter /home/xut/apps/g16/l301.exe)
 Basis read from rwf:  (5D, 7F)
 Pseudo-potential data read from rwf file.
 There are   342 symmetry adapted cartesian basis functions of A   symmetry.
 There are   328 symmetry adapted basis functions of A   symmetry.
   328 basis functions,   538 primitive gaussians,   342 cartesian basis functions
    51 alpha electrons       48 beta electrons
       nuclear repulsion energy       826.2842360127 Hartrees.
 IExCor= 4336 DFT=T Ex+Corr=M062X ExCW=0 ScaHFX=  0.540000
 ScaDFX=  1.000000  1.000000  1.000000  1.000000 ScalE2=  1.000000  1.000000
 IRadAn=      5 IRanWt=     -1 IRanGd=            0 ICorTp=0 IEmpDi=  4
 NAtoms=   19 NActive=   19 NUniq=   19 SFac= 1.00D+00 NAtFMM=   60 NAOKFM=F Big=F
 Integral buffers will be    131072 words long.
 Raffenetti 2 integral format.
 Two-electron integral symmetry is turned on.
 No density basis found on file   724.
 ------------------------------------------------------------------------------
 Polarizable Continuum Model (PCM)
 =================================
 Model                : PCM.
 Atomic radii         : SMD-Coulomb.
 Polarization charges : Total charges.
 Charge compensation  : None.
 Solution method      : On-the-fly selection.
 Cavity type          : VdW (van der Waals Surface) (Alpha=1.000).
 Cavity algorithm     : GePol (No added spheres)
                        Default sphere list used, NSphG=   19.
                        Lebedev-Laikov grids with approx.  5.0 points / Ang**2.
                        Smoothing algorithm: York/Karplus (Gamma=1.0000).
                        Polarization charges: spherical gaussians, with
                                              point-specific exponents (IZeta= 3).
                        Self-potential: point-specific (ISelfS= 7).
                        Self-field    : sphere-specific E.n sum rule (ISelfD= 2).
 1st derivatives      : Analytical E(r).r(x)/FMM algorithm (CHGder, D1EAlg=3).
                        Cavity 1st derivative terms included.
 Solvent              : Water, Eps=  78.355300 Eps(inf)=   1.777849
 ------------------------------------------------------------------------------
 Spheres list:
 ISph  on   Nord     Re0    Alpha      Xe            Ye            Ze
    1   C      1    1.8500  1.000     -0.295679      1.452824     -0.100275
    2   C      2    1.8500  1.000     -1.684060      1.193051     -0.066505
    3   C      3    1.8500  1.000     -2.194759     -0.124915     -0.020938
    4   C      4    1.8500  1.000     -1.323430     -1.171745      0.000183
    5   C      5    1.8500  1.000      0.098284     -0.910009     -0.018888
    6   C      6    1.8500  1.000      0.605655      0.409851     -0.069883
    7   H      7    1.2000  1.000     -2.359952      2.040870     -0.066402
    8   H      8    1.2000  1.000     -1.617165     -2.213824      0.060418
    9   C      9    1.8500  1.000     -3.685553     -0.269353      0.063470
   10   O     10    1.5200  1.000     -4.219390     -1.455243     -0.240688
   11   H     11    1.2000  1.000     -3.575767     -2.094043     -0.578466
   12   O     12    1.5200  1.000     -4.386991      0.632264      0.450029
   13   O     13    1.5200  1.000      0.871388     -1.961299      0.012340
   14   H     14    1.2000  1.000      1.822177     -1.749569      0.013870
   15   O     15    1.5200  1.000      1.935452      0.609405     -0.021606
   16   H     16    1.2000  1.000      2.137186      1.560860     -0.006914
   17   O     17    1.5200  1.000      0.211389      2.687090     -0.147301
   18   H     18    1.2000  1.000     -0.470839      3.375836     -0.135625
   19  Cr     19    1.5115  1.000      4.151951     -0.354004      0.065331
 ------------------------------------------------------------------------------
 GePol: Number of generator spheres                  =      19
 GePol: Total number of spheres                      =      19
 GePol: Number of exposed spheres                    =      19 (100.00%)
 GePol: Number of points                             =    1508
 GePol: Average weight of points                     =       0.13
 GePol: Minimum weight of points                     =   0.61D-08
 GePol: Maximum weight of points                     =    0.21991
 GePol: Number of points with low weight             =      89
 GePol: Fraction of low-weight points (<1% of avg)   =       5.90%
 GePol: Cavity surface area                          =    191.448 Ang**2
 GePol: Cavity volume                                =    156.340 Ang**3
 ------------------------------------------------------------------------------
 Atomic radii for non-electrostatic terms: SMD-CDS.
 ------------------------------------------------------------------------------
 PCM non-electrostatic energy =         0.0105089541 Hartrees.
 Nuclear repulsion after PCM non-electrostatic terms =      826.2947449668 Hartrees.
 Leave Link  301 at Wed May 31 23:10:54 2023, MaxMem=  2684354560 cpu:               0.5 elap:               0.1
 (Enter /home/xut/apps/g16/l302.exe)
 NPDir=0 NMtPBC=     1 NCelOv=     1 NCel=       1 NClECP=     1 NCelD=      1
         NCelK=      1 NCelE2=     1 NClLst=     1 CellRange=     0.0.
 One-electron integrals computed using PRISM.
 One-electron integral symmetry used in STVInt
   1 Symmetry operations used in ECPInt.
 ECPInt:  NShTT=    6105 NPrTT=   23469 LenC2=    5792 LenP2D=   15739.
 LDataN:  DoStor=T MaxTD1= 4 Len=   56
 NBasis=   328 RedAO= T EigKep=  1.95D-06  NBF=   328
 NBsUse=   327 1.00D-06 EigRej=  5.78D-07 NBFU=   327
 Precomputing XC quadrature grid using
 IXCGrd= 4 IRadAn=           5 IRanWt=          -1 IRanGd=           0 AccXCQ= 0.00D+00.
 Generated NRdTot=       0 NPtTot=           0 NUsed=           0 NTot=          32
 NSgBfM=   342   342   342   342   342 MxSgAt=    19 MxSgA2=    19.
 Leave Link  302 at Wed May 31 23:10:55 2023, MaxMem=  2684354560 cpu:               2.2 elap:               0.2
 (Enter /home/xut/apps/g16/l303.exe)
 DipDrv:  MaxL=1.
 Leave Link  303 at Wed May 31 23:10:55 2023, MaxMem=  2684354560 cpu:               0.3 elap:               0.1
 (Enter /home/xut/apps/g16/l401.exe)
 Initial guess from the checkpoint file:  "149-91-7-para15-Cr.chk"
 B after Tr=    -0.000000   -0.000000   -0.000000
         Rot=    1.000000   -0.000653    0.000050    0.000476 Ang=  -0.09 deg.
 Guess basis will be translated and rotated to current coordinates.
 JPrj=2 DoOrth=T DoCkMO=T.
 Initial guess <Sx>= 0.0000 <Sy>= 0.0000 <Sz>= 1.5000 <S**2>= 4.7611 S= 1.7386
 Generating alternative initial guess.
 ExpMin= 1.90D-02 ExpMax= 8.59D+03 ExpMxC= 1.30D+03 IAcc=3 IRadAn=         5 AccDes= 0.00D+00
 Harris functional with IExCor= 1009 and IRadAn=       5 diagonalized for initial guess.
 HarFok:  IExCor= 1009 AccDes= 0.00D+00 IRadAn=         5 IDoV= 1 UseB2=F ITyADJ=14
 ICtDFT=  3500011 ScaDFX=  1.000000  1.000000  1.000000  1.000000
 FoFCou: FMM=F IPFlag=           0 FMFlag=      100000 FMFlg1=           0
         NFxFlg=           0 DoJE=T BraDBF=F KetDBF=T FulRan=T
         wScrn=  0.000000 ICntrl=       500 IOpCl=  0 I1Cent=   200000004 NGrid=           0
         NMat0=    1 NMatS0=      1 NMatT0=    0 NMatD0=    1 NMtDS0=    0 NMtDT0=    0
 Petite list used in FoFCou.
 Harris En= -732.138572748529    
 Leave Link  401 at Wed May 31 23:10:56 2023, MaxMem=  2684354560 cpu:              10.3 elap:               1.1
 (Enter /home/xut/apps/g16/l502.exe)
 Integral symmetry usage will be decided dynamically.
 UHF open shell SCF:
 Using DIIS extrapolation, IDIIS=  1040.
 NGot=  2684354560 LenX=  2684113999 LenY=  2683996594
 Requested convergence on RMS density matrix=1.00D-05 within 128 cycles.
 Requested convergence on MAX density matrix=1.00D-03.
 Requested convergence on             energy=1.00D-03.
 No special actions if energy rises.
 Fock matrices will be formed incrementally for  20 cycles.

 Cycle   1  Pass 1  IDiag  1:
 FoFJK:  IHMeth= 1 ICntrl=       0 DoSepK=F KAlg= 0 I1Cent=           0 FoldK=F
 IRaf= 910000000 NMat=       1 IRICut=       1 DoRegI=T DoRafI=F ISym2E= 0 IDoP0=0 IntGTp=1.
 FoFCou: FMM=F IPFlag=           0 FMFlag=      100000 FMFlg1=           0
         NFxFlg=           0 DoJE=F BraDBF=F KetDBF=F FulRan=T
         wScrn=  0.000000 ICntrl=         0 IOpCl=  1 I1Cent=           0 NGrid=           0
         NMat0=    1 NMatS0=      1 NMatT0=    0 NMatD0=    1 NMtDS0=    0 NMtDT0=    0
 Symmetry not used in FoFCou.
 Inv3:  Mode=1 IEnd=     6822192.
 Iteration    1 A*A^-1 deviation from unit magnitude is 2.44D-15 for     39.
 Iteration    1 A*A^-1 deviation from orthogonality  is 1.62D-15 for    550    190.
 Iteration    1 A^-1*A deviation from unit magnitude is 3.11D-15 for    241.
 Iteration    1 A^-1*A deviation from orthogonality  is 2.90D-15 for    692    241.
 E= -732.216216807375    
 DIIS: error= 3.07D-03 at cycle   1 NSaved=   1.
 NSaved= 1 IEnMin= 1 EnMin= -732.216216807375     IErMin= 1 ErrMin= 3.07D-03
 ErrMax= 3.07D-03  0.00D+00 EMaxC= 1.00D-01 BMatC= 1.78D-02 BMatP= 1.78D-02
 IDIUse=3 WtCom= 9.69D-01 WtEn= 3.07D-02
 Coeff-Com:  0.100D+01
 Coeff-En:   0.100D+01
 Coeff:      0.100D+01
 Gap=     0.461 Goal=   None    Shift=    0.000
 Gap=     0.453 Goal=   None    Shift=    0.000
 GapD=    0.453 DampG=2.000 DampE=1.000 DampFc=2.0000 IDamp=-1.
 RMSDP=7.71D-03 MaxDP=6.29D-01              OVMax= 1.86D-02

 Cycle   2  Pass 1  IDiag  1:
 RMSU=  7.59D-03    CP:  9.79D-01
 E= -732.223013983542     Delta-E=       -0.006797176167 Rises=F Damp=F
 DIIS: error= 7.05D-04 at cycle   2 NSaved=   2.
 NSaved= 2 IEnMin= 2 EnMin= -732.223013983542     IErMin= 2 ErrMin= 7.05D-04
 ErrMax= 7.05D-04  0.00D+00 EMaxC= 1.00D-01 BMatC= 7.66D-04 BMatP= 1.78D-02
 IDIUse=3 WtCom= 9.93D-01 WtEn= 7.05D-03
 Coeff-Com: -0.115D+00 0.112D+01
 Coeff-En:   0.000D+00 0.100D+01
 Coeff:     -0.114D+00 0.111D+01
 Gap=     0.277 Goal=   None    Shift=    0.000
 Gap=     0.148 Goal=   None    Shift=    0.000
 RMSDP=9.30D-04 MaxDP=6.11D-02 DE=-6.80D-03 OVMax= 6.07D-03

 Cycle   3  Pass 1  IDiag  1:
 RMSU=  4.94D-04    CP:  9.76D-01  1.10D+00
 E= -732.223328953850     Delta-E=       -0.000314970308 Rises=F Damp=F
 DIIS: error= 4.04D-04 at cycle   3 NSaved=   3.
 NSaved= 3 IEnMin= 3 EnMin= -732.223328953850     IErMin= 3 ErrMin= 4.04D-04
 ErrMax= 4.04D-04  0.00D+00 EMaxC= 1.00D-01 BMatC= 3.68D-04 BMatP= 7.66D-04
 IDIUse=3 WtCom= 9.96D-01 WtEn= 4.04D-03
 Coeff-Com: -0.734D-01 0.488D+00 0.585D+00
 Coeff-En:   0.000D+00 0.000D+00 0.100D+01
 Coeff:     -0.731D-01 0.486D+00 0.587D+00
 Gap=     0.276 Goal=   None    Shift=    0.000
 Gap=     0.148 Goal=   None    Shift=    0.000
 RMSDP=1.46D-04 MaxDP=9.67D-03 DE=-3.15D-04 OVMax= 8.54D-03

 Cycle   4  Pass 1  IDiag  1:
 RMSU=  1.24D-04    CP:  9.76D-01  1.09D+00  9.09D-01
 E= -732.223417035056     Delta-E=       -0.000088081206 Rises=F Damp=F
 DIIS: error= 1.57D-04 at cycle   4 NSaved=   4.
 NSaved= 4 IEnMin= 4 EnMin= -732.223417035056     IErMin= 4 ErrMin= 1.57D-04
 ErrMax= 1.57D-04  0.00D+00 EMaxC= 1.00D-01 BMatC= 5.67D-05 BMatP= 3.68D-04
 IDIUse=3 WtCom= 9.98D-01 WtEn= 1.57D-03
 Coeff-Com: -0.442D-02-0.325D-01 0.256D+00 0.781D+00
 Coeff-En:   0.000D+00 0.000D+00 0.000D+00 0.100D+01
 Coeff:     -0.442D-02-0.324D-01 0.256D+00 0.781D+00
 Gap=     0.276 Goal=   None    Shift=    0.000
 Gap=     0.148 Goal=   None    Shift=    0.000
 RMSDP=8.40D-05 MaxDP=8.52D-03 DE=-8.81D-05 OVMax= 5.89D-03

 Cycle   5  Pass 1  IDiag  1:
 RMSU=  5.04D-05    CP:  9.76D-01  1.09D+00  1.03D+00  1.06D+00
 E= -732.223444811741     Delta-E=       -0.000027776685 Rises=F Damp=F
 DIIS: error= 1.49D-04 at cycle   5 NSaved=   5.
 NSaved= 5 IEnMin= 5 EnMin= -732.223444811741     IErMin= 5 ErrMin= 1.49D-04
 ErrMax= 1.49D-04  0.00D+00 EMaxC= 1.00D-01 BMatC= 9.97D-06 BMatP= 5.67D-05
 IDIUse=3 WtCom= 9.99D-01 WtEn= 1.49D-03
 Coeff-Com:  0.418D-02-0.598D-01 0.986D-01 0.319D+00 0.638D+00
 Coeff-En:   0.000D+00 0.000D+00 0.000D+00 0.000D+00 0.100D+01
 Coeff:      0.417D-02-0.597D-01 0.985D-01 0.318D+00 0.639D+00
 Gap=     0.276 Goal=   None    Shift=    0.000
 Gap=     0.148 Goal=   None    Shift=    0.000
 RMSDP=4.27D-05 MaxDP=4.32D-03 DE=-2.78D-05 OVMax= 4.22D-03

 Cycle   6  Pass 1  IDiag  1:
 RMSU=  2.02D-05    CP:  9.76D-01  1.09D+00  1.08D+00  1.14D+00  1.48D+00
 E= -732.223456700251     Delta-E=       -0.000011888510 Rises=F Damp=F
 DIIS: error= 1.44D-04 at cycle   6 NSaved=   6.
 NSaved= 6 IEnMin= 6 EnMin= -732.223456700251     IErMin= 6 ErrMin= 1.44D-04
 ErrMax= 1.44D-04  0.00D+00 EMaxC= 1.00D-01 BMatC= 5.16D-06 BMatP= 9.97D-06
 IDIUse=3 WtCom= 9.99D-01 WtEn= 1.44D-03
 Coeff-Com:  0.279D-02-0.130D-01-0.276D-02-0.178D+00 0.139D-01 0.118D+01
 Coeff-En:   0.000D+00 0.000D+00 0.000D+00 0.000D+00 0.000D+00 0.100D+01
 Coeff:      0.279D-02-0.130D-01-0.275D-02-0.178D+00 0.139D-01 0.118D+01
 Gap=     0.277 Goal=   None    Shift=    0.000
 Gap=     0.148 Goal=   None    Shift=    0.000
 RMSDP=5.10D-05 MaxDP=6.07D-03 DE=-1.19D-05 OVMax= 7.68D-03

 Cycle   7  Pass 1  IDiag  1:
 RMSU=  1.68D-05    CP:  9.76D-01  1.09D+00  1.13D+00  1.21D+00  2.10D+00
                    CP:  1.98D+00
 E= -732.223473832810     Delta-E=       -0.000017132558 Rises=F Damp=F
 DIIS: error= 1.17D-04 at cycle   7 NSaved=   7.
 NSaved= 7 IEnMin= 7 EnMin= -732.223473832810     IErMin= 7 ErrMin= 1.17D-04
 ErrMax= 1.17D-04  0.00D+00 EMaxC= 1.00D-01 BMatC= 4.56D-06 BMatP= 5.16D-06
 IDIUse=3 WtCom= 9.99D-01 WtEn= 1.17D-03
 Coeff-Com: -0.269D-02 0.348D-01 0.521D-02-0.244D+00-0.628D+00 0.501D+00
 Coeff-Com:  0.133D+01
 Coeff-En:   0.000D+00 0.000D+00 0.000D+00 0.000D+00 0.000D+00 0.000D+00
 Coeff-En:   0.100D+01
 Coeff:     -0.268D-02 0.347D-01 0.520D-02-0.243D+00-0.628D+00 0.501D+00
 Coeff:      0.133D+01
 Gap=     0.277 Goal=   None    Shift=    0.000
 Gap=     0.148 Goal=   None    Shift=    0.000
 RMSDP=7.97D-05 MaxDP=9.48D-03 DE=-1.71D-05 OVMax= 1.10D-02

 Cycle   8  Pass 1  IDiag  1:
[truncated: 1,587,623 more chars]
