# Supplementary material for: Characterization of the binding process between gallic acid and trivalent chromium in tannery wastewater: a spectroscopic perspective
Source: Royal Society of Chemistry journal article supplement (doi:10.1039/d4em00621f), 2025-01-01
Supplement: d4em00621f7.pdf [file d4em00621f7.pdf]

1 **Supplementary material**

2 **Characterization of the binding process between gallic acid and trivalent**  
3 **chromium in tannery wastewater: A spectroscopic perspective**

4 Situ Mu<sup>a,b,1</sup>, Qi Yang<sup>a,1</sup>, Chenxu Yan<sup>a</sup>, Tong Xu<sup>a,b</sup>, Jing Zhang<sup>a,b</sup>, Junjun Ma<sup>a,b</sup>, Chun Liu<sup>a,b\*</sup>

5 <sup>a</sup> School of Environmental Science and Engineering, Hebei University of Science and  
6 Technology, Shijiazhuang 050018, China

7 <sup>b</sup> Pollution Prevention Biotechnology Laboratory of Hebei Province, Hebei University of  
8 Science and Technology, Shijiazhuang 050018, China

9

10

11

12

13

14

15

---

16 \*Corresponding author, E-mail: [liuchun@hebust.edu.cn](mailto:liuchun@hebust.edu.cn)

17 <sup>1</sup> These authors contributed equally to this work.

18

19

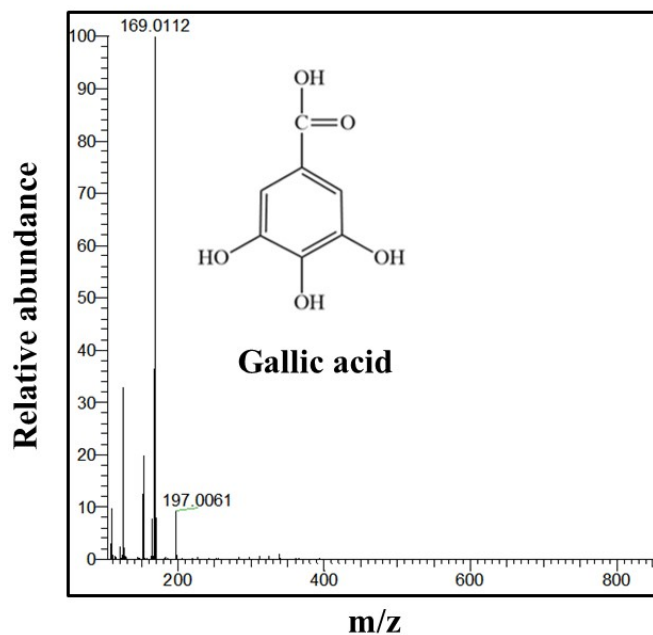

20

21

22

**Fig S1. The mass spectra of GA.**

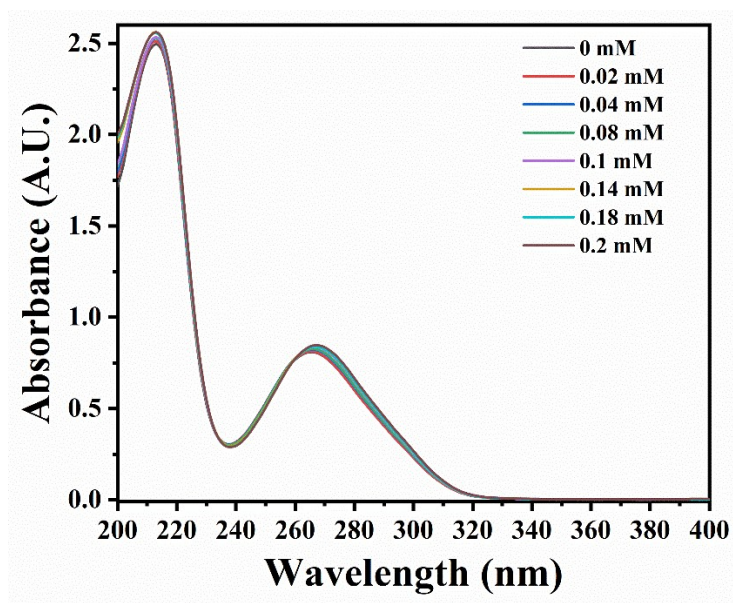

23

**Fig S2. UV-vis spectra of the interaction of different concentrations of Cr<sup>3+</sup> ions with**

25

**GA.**

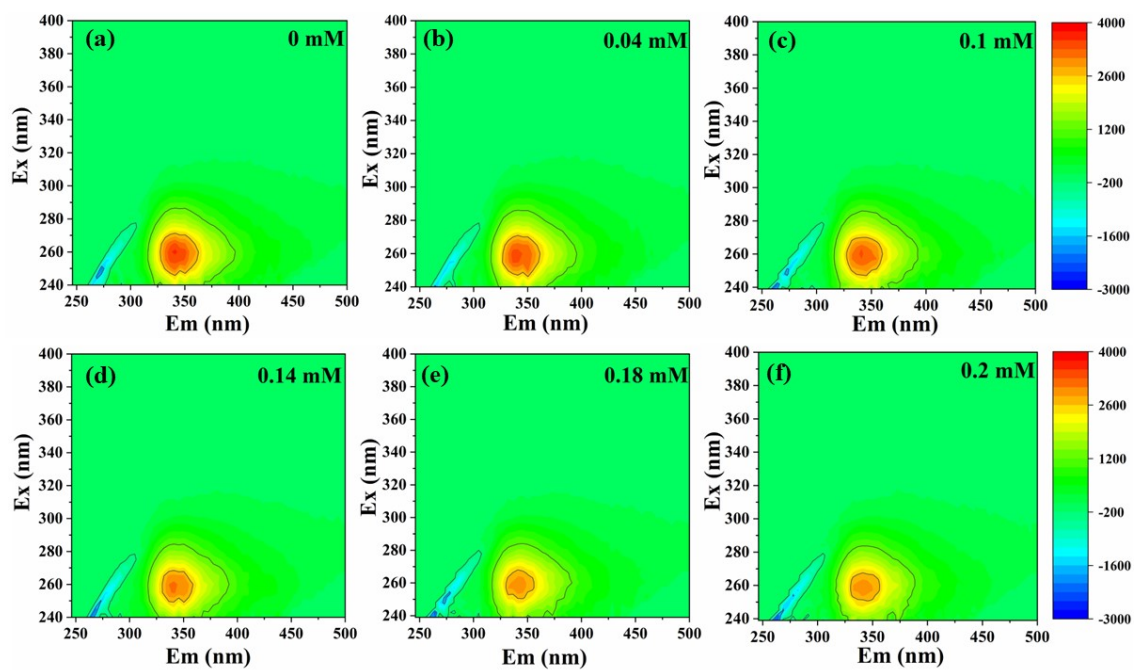

26

27

**Fig S3. Fluorescence EEM results of GA with different concentrations of Cr<sup>3+</sup> ions.**

28

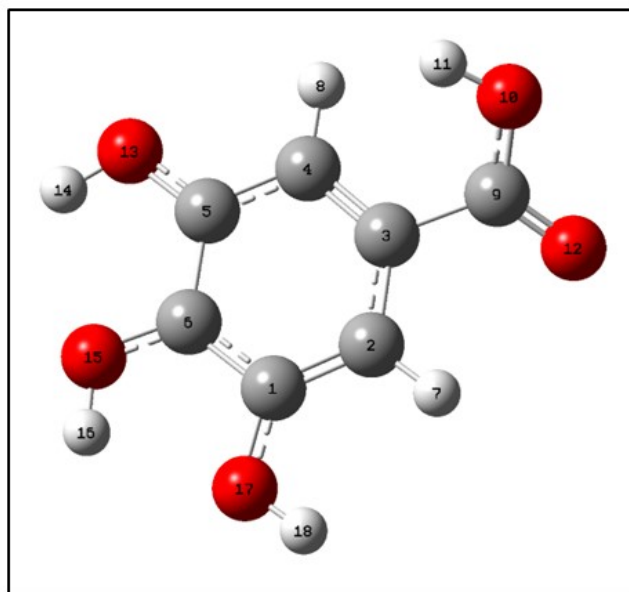

29

30

**Fig S4. The optimized structure of GA.**

31
